# Supplementary material
Source: Research Square preprint supplement (doi:10.21203/rs.3.rs-9577216/v1)
Supplement: Supplementary file 1 [file 0b0229945242d6143b96c03b.xlsx]

## Sheet: Primary_Screening
Supplementary Table 1. Primary screening: determination of cell viability of senescent MM27 cells (P5091 + compound library)
MM27 cells | P5091 (5 µM, 48 h) + compound library (1 µM, 72 h) | Cell viability normalized to DMSO (CyQUANT)
Mean and SD of duplicate measurements per compound. Viability ≤ 0.45 defined as primary hit threshold (n = 79 compounds, indicated in orange).
Compound number	Compound name	Mean viability (P5091 + compound)	SD
1	Kinetin	0.8855	0.3797
2	PHA-680632	0.368	0.116
3	Salvinorin A	0.854	0.413
4	Hieracin	0.924	0.3338
5	Oleanoic acid	0.852	0.3196
6	6alpha-Methylprednisolone Acetate	0.8635	0.3217
7	Tanshinone IIA	0.6885	0.244
8	Digoxigenin	0.786	0.3592
9	GNX_5086	0.7825	0.2878
10	Mimosine	0.8515	0.3345
11	Hesperetin	0.713	0.239
12	Lupanine perchlorate	0.853	0.4738
13	10-Hydroxycamptothecin	0.0885	0.0262
14	Baicalein	0.6865	0.3825
15	Cholic acid	0.8055	0.3571
16	Strophanthidin	0.282	0.1386
17	Bisabolol	0.7925	0.3543
18	Alpha-amanitin	0.0595	0.0148
19	Chlorogenic acid	0.7405	0.2835
20	Sclareol	0.6155	0.152
21	Huperzine A	0.7125	0.2609
22	Tetrandrine	0.7455	0.1803
23	Diplosalsalate	0.6475	0.1025
24	Aesculin	0.7695	0.4632
25	Sclareolide	0.6975	0.3316
26	4-Hydroxyantipyrine	0.6765	0.3316
27	KU-60019	0.672	0.2234
28	Physcion	0.652	0.2857
29	Epiandrosterone	0.696	0.1273
30	Curcumin	0.5575	0.2397
31	Palmatine chloride	0.6775	0.2666
32	Peruvoside	0.044	0.0127
33	Menaquinone-4	0.7065	0.1619
34	Cyclocreatine	0.6975	0.2623
35	Secnidazole	0.6965	0.3104
36	RI-1	0.8105	0.2934
37	ENMD-2076 L-(+)-Tartaric acid	0.2315	0.1138
38	Epigallocatechin-3-monogallate	0.6615	0.2143
39	Picropodophyllin	0.0915	0.0318
40	Salidroside	0.701	0.099
41	Palmatine	0.695	0.2249
42	Alpha-Hydroxydeoxycolic acid	0.668	0.0849
43	Trimethylcolchicinic acid	0.7255	0.1153
44	Pyrromycin	0.7155	0.2298
45	TH588 hydrochloride	0.1835	0.0643
46	Ruxolitinib (INCB018424)	0.665	0.1598
47	Nobiletin	0.7125	0.3246
48	Betulinic acid	0.675	0.3564
49	Anisomycin	0.0605	0.0134
50	3.3'-Diindolylmethane	0.7135	0.3147
51	Biochanin A	0.78	0.3536
52	Trolox	0.881	0.4016
53	Lucitanib	0.745	0.3309
54	PIP-199	0.3315	0.1252
55	Pyridostatin trifluoroacetate	0.328	0.0042
56	GSK J1	0.537	0.0792
57	Scriptaid	0.128	0.0042
58	Artemisinin	0.6365	0.07
59	Hydroquinidine	0.66	0.0113
60	Cepharanthine	0.7245	0.0205
61	Bisacodyl	0.6795	0.0247
62	Busulfan	0.5945	0.0049
63	M344	0.126	0.0226
64	Aphidicolin	0.1975	0.0247
65	CPI-169	0.673	0.0071
66	BI-7273	0.636	0.0792
67	Bergapten	0.524	0.0453
68	Benfotiamine	0.644	0.0608
69	Ornithine	0.526	0.0141
70	Amprolium	0.582	0.0622
71	Antipyrine	0.545	0.0523
72	Tofacitinib (cp-690550,tasocitinib)	0.621	0.0311
73	NU7441	0.5225	0.1025
74	SP2509	0.092	0.0028
75	ITSA-1	0.544	0.0099
76	Ellagic acid	0.514	0.0976
77	Sulmazole	0.514	0.0311
78	Cetylpyridinium chloride	0.4845	0.0403
79	Carisoprodol	0.568	0.0933
80	Aminosalicylate sodium	0.5665	0.1237
81	Sirtinol	0.584	0.1117
82	THZ1	0.023	0.0014
83	OF-1	0.606	0.1739
84	Carboplatin	0.4335	0.0997
85	Sulfanilamide	0.5665	0.0035
86	Guanidine hydrochloride	0.552	0.0368
87	Allopurinol	0.57	0.041
88	Chloramphenicol	0.59	0.0735
89	Benzocaine	0.5505	0.0445
90	CEP-33779	0.4765	0.0445
91	MG149	0.622	0.0481
92	I-BRD9	0.5255	0.0615
93	Nedaplatin	0.414	0.0198
94	Dipyrocetyl	0.5845	0.0247
95	Ajmaline	0.6105	0.0898
96	Amoxicillin	0.6135	0.1209
97	Dactinomycin	0.028	0.0028
98	Capreomycin sulfate	0.6355	0.0983
99	RG108	0.623	0.1075
100	GSK-LSD1 2HCL	0.462	0.0014
101	SMI-4a	0.581	0.0764
102	APTSTAT3-9R	0.5745	0.0587
103	Pantethine	0.6225	0.0021
104	Fendiline hydrochloride	0.624	0.0778
105	Chloramphenicol palmitate	0.7	0.0141
106	Mitomycin C	0.156	0.017
107	TG101209	0.253	0.017
108	SGC 0946	0.651	0.0976
109	Zebularine	0.6825	0.0785
110	Ml324	0.586	0.0127
111	Altretamine	0.628	0.1032
112	Antozoline Hydrochloride	0.694	0.0141
113	Opipramol Dihydrochloride	0.6615	0.07
114	Riboflavin	0.573	0.1032
115	Tilorone	0.666	0.1188
116	Zolmitriptan	0.593	0.0651
117	Warfarin	0.7005	0.0163
118	RGFP966	0.5885	0.0092
119	PJ34 HCl	0.59	0.0523
120	N-(4-Amino-2-chlorophenyl)phthalimide	0.548	0.0184
121	Tracazolate	0.564	0.0141
122	8-Bromo-cGMP sodium	0.727	0.0693
123	Flumethasone	0.614	0.0198
124	Aztreonam	0.6695	0.1138
125	Flurandrenolide	0.6115	0.0431
126	Iodipamide	0.552	0.0537
127	Bromosporine	0.4225	0.0318
128	CPI-203	0.1635	0.0276
129	Fulvestrant	0.607	0.0438
130	Indirubin-3'-oxime	0.6985	0.0417
131	TBBz	0.647	0.0679
132	Folic acid	0.5705	0.0615
133	Mycophenolate mofetil	0.176	0.0198
134	Ampiroxicam	0.5815	0.0573
135	Monobenzone	0.5945	0.0841
136	SGC-CBP30	0.742	0.0665
137	N-Acetyl-L-Cysteine	0.559	0.075
138	(?)-p-Aminoglutethimide	0.5205	0.0106
139	S(-)-Atenolol	0.516	0.0297
140	Thiopental sodium	0.61	0.0424
141	Artesunate	0.3945	0.0247
142	Tranexamic acid	0.592	0.0764
143	Vidarabine	0.649	0.058
144	Cholecalciferol	0.6175	0.0884
145	MM-102	0.675	0.0099
146	Amiloride hydrochloride	0.559	0.0976
147	Amsacrine hydrochloride	0.183	0.0127
148	Alaproclate hydrochloride	0.6435	0.0304
149	Finasteride	0.6275	0.0219
150	Penfluridol	0.511	0.0693
151	Omeprazole	0.533	0.0255
152	Ouabain	0.075	0.0226
153	Allantoin	0.614	0.0721
154	PFI-2	0.714	0.0608
155	Chlormethiazole hydrochloride	0.63	0.0198
156	Paroxetine hydrochloride hemihydrate	0.503	0
157	AS-252424	0.6485	0.0785
158	Carbenoxolone sodium	0.595	0.1004
159	Vardenafil hydrochloride	0.6385	0.0092
160	Sulconazole nitrate	0.6055	0.0629
161	Triamcinolone acetonide	0.5875	0.1039
162	Cimetidine	0.7005	0.0955
163	Phenylmercuric acetate	0.0325	0.0007
164	Vancomycin hydrochloride	0.519	0.0113
165	(?)-CPP	0.4805	0.0092
166	Droperidol	0.548	0.017
167	Dequalinium chloride hydrate	0.355	0.0212
168	Paliperidone	0.482	0.0721
169	1,3,5-tris(4-hydroxyphenyl)-4-propyl-1H-pyrazole	0.458	0.0127
170	BNTX maleate salt hydrate	0.28	0.075
171	Oxyquinoline hemisulfate	0.4595	0.0389
172	Aminacrine	0.312	0
173	Butamben	0.46	0.0566
174	(?)-CGP-12177A hydrochloride	0.49	0.0184
175	D-ribofuranosylbenzimidazole	0.453	0.0438
176	N^G,N^G-Dimethylarginine hydrochloride	0.495	0.0651
177	Hydralazine hydrochloride	0.458	0.0905
178	JS-K	0.47	0.0368
179	Ibudilast	0.5045	0.07
180	Piperazine	0.494	0.0311
181	Nizatidine	0.4745	0.0559
182	Dehydrocholic acid	0.404	0.0608
183	Y-27632 dihydrochloride	0.5435	0.0559
184	Sant-1	0.4705	0.0233
185	1,7-dimethylxanthine	0.487	0.0608
186	Bendamustine hydrochloride	0.404	0.0057
187	Retinoic acid p-hydroxyanilide	0.4175	0.0219
188	CPNQ	0.4305	0.029
189	Probenecid	0.469	0.0679
190	Bekanamycin sulfate	0.434	0.0113
191	Camptothecin	0.0805	0.0007
192	CGS-15943	0.3005	0.0361
193	Dextromethorphan hydrobromide monohydrate	0.48	0.0283
194	2,3-Dimethoxy-1,4-naphthoquinone	0.4535	0.0672
195	Hydroxytacrine maleate	0.495	0.0269
196	ABT-702 dihydrochloride	0.412	0.024
197	NSC 95397	0.3655	0.0841
198	Pyrantel pamoate	0.439	0.0127
199	Piperine	0.514	0.0028
200	CK2 inhibitor 2	0.528	0.075
201	Tocainide hydrochloride	0.456	0.0339
202	Carvedilol	0.465	0.0368
203	Guanabenz acetate	0.4685	0.0346
204	Hydrocortisone	0.4355	0.0219
205	Hydroxyurea	0.458	0.0028
206	Imazodan	0.2935	0.0276
207	Streptozosin	0.477	0.024
208	Mycophenolic acid	0.1695	0.0247
209	Ebastine	0.5165	0.0191
210	2'.3'-didehydro-3'-deoxythymidine	0.5155	0.0742
211	Diphenyleneiodonium chloride	0.3535	0.0092
212	JFD00244	0.5445	0.0007
213	SB 218795	0.479	0.0283
214	MNS	0.448	0.0976
215	Idarubicin	0.04	0.0014
216	Rifampin	0.5155	0.0799
217	Auranofin	0.0585	0.0219
218	N-Oleoyldopamine	0.726	0.0863
219	Pheniramine	0.6635	0.0601
220	Propantheline	0.596	0.0537
221	1-Phenylbiguanide	0.5815	0.0276
222	SU 6656	0.6565	0.0205
223	5-Bromo-2'-deoxyuridine	0.245	0.0127
224	BTCP hydrochloride	0.556	0.0071
225	Caffeic Acid	0.5545	0.0728
226	SR 57227A	0.6275	0.1252
227	D-Serine	0.58	0.0014
228	Primidone	0.5655	0.0488
229	Paromomycin sulfate	0.4835	0.0658
230	SID7969543	0.569	0.082
231	Quinidine sulfate	0.616	0.0382
232	BAY 11-7085	0.35	0.0396
233	DAPH	0.5595	0.0035
234	Cilostazol	0.568	0.0071
235	Spermidine trihydrochloride	0.6125	0.0346
236	SB 205384	0.495	0.0028
237	Phentolamine mesylate	0.4905	0.0134
238	Propentofylline	0.5915	0.0247
239	Pirenperone	0.561	0.0509
240	(?)-Quinpirole dihydrochloride	0.4595	0.0573
241	Betamethasone	0.5155	0.046
242	Chlorambucil	0.5745	0.0672
243	ML-9	0.584	0.0283
244	Spermine tetrahydrochloride	0.4155	0.029
245	Succinylcholine	0.5375	0.0021
246	Prazosin hydrochloride	0.4675	0.0219
247	Ziprasidone hydrochloride monohydrate	0.482	0.0057
248	IC 261	0.2295	0.0007
249	O6-benzylguanine	0.536	0.0509
250	Buspirone hydrochloride	0.5245	0.0573
251	Ciprofibrate	0.524	0.0919
252	Chlorpropamide	0.5845	0.0134
253	AGK2	0.5465	0.0912
254	SU 5416	0.4875	0.0573
255	Pargyline hydrochloride	0.5455	0.0064
256	R(+)-3PPP hydrochloride	0.571	0.0891
257	BAY 11-7082	0.527	0.0184
258	L-Buthionine-sulfoximine	0.601	0.0297
259	Benserazide hydrochloride	0.5385	0.0417
260	Carmustine	0.4895	0.0021
261	1-(4-Chlorobenzyl)-5-methoxy-2-methylindole-3-acetic acid	0.63	0.1117
262	Stattic	0.268	0.0721
263	Phenelzine sulfate	0.543	0.1513
264	Phenylbutazone	0.5305	0.0771
265	Bicalutamide (CDX)	0.614	0.0509
266	PD 98,059	0.652	0.024
267	Bumetanide	0.6265	0.0841
268	Bestatin hydrochloride	0.631	0.0339
269	PK 11195	0.566	0.0113
270	BTO-1	0.6145	0.0559
271	Digitoxin	0.041	0.0042
272	Equilin	0.634	0.1018
273	Erythromycin ethylsuccinate	0.6965	0.1435
274	Estradiol cypionate	0.6305	0.0757
275	Tioconazole	0.629	0.0594
276	Etomidate	0.631	0.1584
277	Diloxanide furoate	0.5645	0.0106
278	Ml-7	0.7145	0.012
279	Imiloxan hydrochloride	0.643	0.0608
280	Emetine	0.0655	0.0035
281	Ergocalciferol	0.627	0.1669
282	Ciclopirox olamine	0.4315	0.1407
283	Epirubicin hydrochloride	0.059	0.0028
284	Aliskiren hemifumarate	0.5055	0.0191
285	Ticlopidine hydrochloride	0.577	0.0438
286	Fludarabine phosphate	0.581	0.0071
287	(?)-Ibotenic acid	0.6675	0.1987
288	M-Iodobenzylguanidine hemisulfate	0.6425	0.0474
289	Clomiphene citrate	0.6415	0.145
290	Cyclophosphamide hydrate	0.529	0.1146
291	Dienestrol	0.567	0.0566
292	Levocarnitine	0.6345	0.1747
293	Florfenicol	0.612	0.0622
294	Ticarcillin disodium	0.5835	0.0884
295	Pyridoxine	0.63	0.099
296	Isotharine mesylate	0.5705	0.1421
297	SB-525334	0.647	0.0255
298	Cromolyn sodium	0.593	0.0778
299	Dicumarol	0.605	0.0566
300	Colistimethate sodium	0.612	0.0269
301	Doxorubicin	0.02	0.0014
302	Anagrelide hydrochloride	0.236	0.0863
303	Bisoprolol fumarate	0.6125	0.1237
304	Ifosfamide1	0.5685	0.186
305	Idazoxan hydrochloride	0.5575	0.0841
306	1,5-Isoquinolinediol	0.627	0.0368
307	Daunorubicin	0.669	0.0368
308	Doxepin hydrochloride	0.621	0.1174
309	Cytarabine	0.0815	0.0191
310	Rolitetracycline	0.559	0.1047
311	Ethoxzolamide	0.679	0.0085
312	Tolmetin sodium	0.6055	0.1704
313	Tadalafil	0.709	0.1853
314	Cibenzoline succinate	0.6645	0.0884
315	Molindone hydrochloride	0.6035	0.152
316	Digoxin	0.2615	0.0559
317	Cloxyquin	0.5875	0.0955
318	Deferoxamine mesylate	0.6355	0.053
319	Thiamine	0.5965	0.0361
320	Nithiamide	0.677	0.0156
321	Prednisolone hemisuccinate	0.613	0.0396
322	Toremiphene citrate	0.69	0.0552
323	Ivermectin	0.7375	0.0361
324	Ib-meca	0.689	0.2121
325	Trequinsin hydrochloride	0.5218	0.0374
326	Tyrphostin AG 1478	0.5216	0.0242
327	Tyrphostin AG 555	0.6412	0.0777
328	Triamcinolone	0.6311	0.0048
329	Risperidone	0.5984	0.0753
330	Valganciclovir hydrochloride	0.5747	0.1105
331	Ritonavir	0.5895	0.0379
332	Phensuccimide	0.5463	0.0688
333	Diaveridine	0.6322	0
334	Tyrphostin AG 879	0.5568	0.0218
335	Tetrahydrozoline hydrochloride	0.5034	0.0699
336	Tyrphostin AG 698	0.5612	0.1059
337	S(-)-timolol	0.515	0.0358
338	Tiletamine hydrochloride	0.5307	0.0624
339	Ecamsule triethanolamine	0.5766	0.0664
340	Docetaxel	0.08	0.0169
341	Mercaptopurine	0.5475	0.0054
342	Isradipine	0.5123	0.0309
343	Trimipramine	0.4823	0.0132
344	Tyrphostin AG 494	0.5115	0.0503
345	NSC348884 hydrate	0.5756	0.0285
346	Triprolidine hydrochloride	0.4937	0.0723
347	Methyclothiazide	0.549	0.0446
348	Vinorelbine	0.0846	0.004
349	Nelarabin	0.5459	0.0527
350	Dasatinib	0.456	0.0686
351	Metyrapone	0.5935	0.043
352	Tyrphostin AG 490	0.5887	0.0218
353	cDPCP	0.6125	0.0672
354	Tulobuterol hydrochloride	0.5209	0.0215
355	Tyrphostin AG 112	0.568	0.0194
356	Capecitabine	0.534	0.0626
357	Candesartan	0.5536	0.0339
358	Naftifine hydrochloride	0.5245	0.0444
359	Propoxycaine hydrochloride	0.6119	0.0261
360	Guanadrel sulfate	0.5771	0.0215
361	TTNPB	0.5328	0.0288
362	BIX 01294 trihydrochloride hydrate	0.1555	0
363	Trazodone hydrochloride	0.5513	0.0005
364	Tyrphostin 1	0.5596	0.0274
365	Tandutinib	0.4766	0.0164
366	Quinethazone	0.4977	0.014
367	Gefitinib	0.5024	0.0056
368	Mometasone furoate	0.5237	0.0922
369	Anisindione	0.4781	0.039
370	Triamterene	0.6895	0.1309
371	Tyrphostin AG 537	0.6199	0.0513
372	BAY 61-3606 hydrochloride hydrate	0.5925	0.0589
373	Tyrphostin 23	0.5359	0.0465
374	Nevirapine	0.5939	0.0876
375	Cefepime hydrochloride	0.6127	0.0524
376	Temozolomide	0.5585	0.0317
377	Abacavir sulfate	0.5811	0.0976
378	Anastrozole	0.6271	0.1583
379	Lomustine	0.6295	0.1464
380	Algestone acetophenide	0.6575	0.1775
381	Vorinostat	0.2385	0.0191
382	Vandetanib	0.5805	0.0474
383	PD 0332991 (Palbociclib) HCl	0.249	0.0368
384	Ponatinib (AP24534)	0.0345	0.0035
385	Dabrafenib (GSK2118436)	0.0325	0.0007
386	LY2090314	0.275	0.0212
387	Losmapimod	0.633	0.0127
388	Thonzonium bromide	0.6205	0.0177
389	Balsalazide disodium	0.5515	0.0799
390	Axitinib	0.333	0.0255
391	Olaparib (AZD2281)	0.4005	0.0841
392	Everolimus (RAD001)	0.626	0.0594
393	Pomalidomide	0.5415	0.0148
394	Carfilzomib (PR-171)	0.024	0.0042
395	AZD1208	0.4895	0.0403
396	Poziotinib (HM781-36B)	0.47	0.0184
397	Mesoridazine besylate	0.6	0.0354
398	Terconazole	0.469	0.0509
399	Bosutinib (SKI-606)	0.325	0.0014
400	Crizotinib (PF-02341066)	0.3055	0.0106
401	E7080 (Lenvatinib)	0.596	0.0311
402	Cal-101 (gs-1101)	0.5315	0.0742
403	Cabazitaxel (Jevtana)	0.1455	0.0092
404	GLPG0634	0.725	0.2065
405	HO-3867	0.591	0.0071
406	Piperacetazine	0.667	0.082
407	Dacarbazine	0.5805	0.0247
408	Lenalidomide	0.4935	0.0643
409	Vismodegib (GDC-0449)	0.536	0.0424
410	Regorafenib (BAY 73-4506)	0.5645	0.1011
411	Abiraterone acetate	0.6385	0.0361
412	Cabozantinib malate	0.7075	0.0148
413	LGK-974	0.5415	0.0262
414	Afuresertib (GSK2110183)	0.548	0.1018
415	Lamivudine	0.5555	0.0559
416	Clofarabine	0.136	0.024
417	Panobinostat	0.014	0.0014
418	Belinostat (PXD101)	0.0965	0.0035
419	MDV3100 (Enzalutamide)	0.5725	0.1223
420	GSK1120212 (Trametinib)	0.0265	0.0078
421	LCL161	0.6125	0.0064
422	Glasdegib (PF-04449913)	0.484	0.0467
423	EW-7197	0.5565	0.0332
424	Oxaliplatin	0.592	0.0636
425	Repaglinide	0.54	0.0283
426	Pazopanib HCl	0.622	0.0467
427	RDEA119 (BAY 869766)	0.035	0.0085
428	Vemurafenib (PLX4032)	0.132	0.0184
429	Ibrutinib	0.5865	0.0148
430	Xl019	0.5545	0.0771
431	Idasanutlin (RG-7388)	0.4945	0.0573
432	GDC-0994	0.065	0.017
433	4SC-202	0.28	0.0438
434	LDC1267	0.5795	0.0021
435	CH5183284 (Debio-1347)	0.5905	0.0559
436	Erlotinib	0.46	0.0863
437	Cyclo (-RGDfK)	0.5515	0.012
438	AT13148	0.3825	0.0219
439	Pilaralisib (XL147)	0.566	0.099
440	Salirasib	0.526	0.0948
441	SRT2104 (GSK2245840)	0.5545	0.0346
442	LY3009120	0.051	0.0028
443	Filgotinib	0.5775	0.1308
444	MI-773 (SAR405838)	0.0605	0.0049
445	LY2584702 tosylate	0.4815	0.0134
446	Pexmetinib (ARRY-614)	0.7115	0.0742
447	Pacritinib (SB1518)	0.5035	0.0247
448	PI-3065	0.541	0.0339
449	PND-1186 (VS-4718)	0.3405	0.0318
450	Dovitinib (TKI258) lactate	0.1105	0.0163
451	AT7519 HCl	0.0395	0.0021
452	Bardoxolone methyl	0.0495	0.0064
453	Cerdulatinib (PRT062070, PRT2070)	0.347	0.0156
454	Defactinib (VS-6063, PF-04554878)	0.4155	0.029
455	Sunitinib	0.258	0.0212
456	Afatinib (BIBW2992) dimaleate	0.303	0.0651
457	DTP3	0.6055	0.0035
458	CB-839	0.501	0.0057
459	Combretastatin A4	0.1	0.017
460	MHY1485	0.574	0.0269
Orange bold = primary hit (mean viability ≤ 0.45)
