# Supplementary material
Source: Research Square preprint supplement (doi:10.21203/rs.3.rs-9577216/v1)
Supplement: Supplementary file 2 [file 1ed22f6ed428685be3cafbf5.xlsx]

## Sheet: INDEX
Supplementary Table 10. MM27/MM13 Common DEGs - EnrichR Pathway Analysis (Auranofin vs DMSO)
Sheet	Database	Direction	Total pathways	Significant (adj.p<0.05)
Common_DEG_UP	Common DEG list	Upregulated	87
Common_DEG_DN	Common DEG list	Downregulated	41
Reactome_UP	Reactome Pathways 2024	Upregulated	351	29
WikiPathways_UP	WikiPathways 2024 Human	Upregulated	207	36
KEGG_UP	KEGG 2021 Human	Upregulated	103	12
MSigDB_Hallmark_UP	MSigDB Hallmark 2020	Upregulated	34	11
NCI_Nature_DN	NCI-Nature 2016	Downregulated	23	6
KEA_DN	KEA 2015	Downregulated	38	4
GO_BioProcess_DN	GO Biological Process 2025	Downregulated	469	20
ARCHS4_Kinases_DN	ARCHS4 Kinases Coexpression	Downregulated	255	24

## Sheet: Common_DEG_UP
MM27/MM13 Common Upregulated DEGs Auranofin vs DMSO | log2FC > 1
Total common genes: 87 | Sorted by MM27 log2FC
Gene	MM27 log2FC	MM27 Adj P-value	MM13 log2FC	MM13 Adj P-value
ANXA10	7.3098	1.29467e-16	2.3496	0.000580536
HMOX1	6.3548	1.54591e-212	5.0592	1e-197
AKR1C3	6.3401	3.88679e-12	1.3849	9.49932e-13
AKR1C7P	6.3201	1.37964e-19	2.0054	1.18936e-16
AKR1B10	5.9035	4.16764e-70	2.2674	0.0226749
AKR1C1	4.9524	7.24733e-14	3.0233	7.40679e-80
LINC00942	4.3778	1.13143e-05	4.1086	6.60592e-08
AFP	4.3052	1.93181e-19	1.8232	4.07945e-07
LUCAT1	4.1005	4.38206e-65	1.8909	1.02173e-06
CLU	4.0325	3.09412e-58	1.0443	2.00696e-18
CXCL8	3.5342	2.04956e-51	3.729	3.14076e-72
CCL26	3.4299	1.19201e-06	1.8992	1.65723e-13
UCHL1	3.3462	5.16401e-10	5.3902	0.000397346
AP1M2	3.2643	3.63498e-14	1.0088	0.380168
STYK1	3.1558	3.6455e-19	1.9305	1.8543e-16
GCLM	3.1406	0	2.0195	3.29597e-123
LOC105374811	3.0714	2.11949e-08	2.9009	8.312e-20
GCNT3	3.0308	1.23467e-46	3.6403	1.4161e-25
SLC7A11	3.0033	1.08355e-201	3.5158	1.2493e-232
BIRC3	2.9768	1.3447e-28	2.4504	1.95955e-45
HTRA3	2.9759	1.03608e-13	1.8068	0.00389655
AQP3	2.9426	2.3809e-06	1.9813	0.0289849
TUBA4A	2.8453	5.87527e-38	2.169	5.17423e-33
SLC12A8	2.821	1.17346e-26	1.3194	9.68634e-06
TFEC	2.515	1.60523e-09	2.3479	9.76457e-09
MYBPC1	2.4981	5.03113e-05	1.3411	0.18435
MIR193BHG	2.4891	1.66118e-38	1.896	1.48428e-05
SRXN1	2.4847	4.56869e-148	1.2631	3.34418e-48
SLC7A11-AS1	2.2864	2.38541e-08	2.1899	0.00869009
LINC02535	2.2406	1.52845e-09	1.1365	7.03034e-17
LOC105371967	2.24	3.48667e-17	3.1503	0.00121848
NMRAL2P	2.2025	3.16971e-64	4.3398	7.68184e-29
CYP19A1	2.1943	1.12622e-06	1.4906	0.0255569
LOC105374027	2.1766	8.56982e-11	2.8961	0.000603891
ABCC2	2.1444	9.69318e-42	1.1222	9.40955e-08
KYNU	2.0817	8.43864e-73	1.9449	7.56675e-55
PTHLH	2.0481	9.90194e-08	1.6175	0.0040304
TRIM16L	2.0296	4.83351e-34	2.6329	1.21274e-82
HECW1	2.0123	8.52524e-10	1.0702	0.275913
TXN	2.0072	2.7779e-13	1.1157	3.09507e-07
GLA	1.9535	1.1766e-52	1.6807	5.75713e-32
LINC02806	1.9414	7.75767e-05	2.6895	0.00138106
LOC107985423	1.9212	1.06981e-18	2.5631	0.00190802
TM4SF19	1.8967	0.000308032	1.3106	3.70077e-08
LURAP1L-AS1	1.8679	0.000108059	2.7664	1.08179e-07
UNKL	1.8471	1.18768e-25	1.4534	8.32994e-10
TRIM16	1.824	3.23545e-34	2.1333	6.59257e-96
KCNE4	1.788	3.47898e-59	1.8144	4.64921e-30
CXCL2	1.7616	0.0011427	1.1806	0.277208
IL13RA2	1.74	4.35115e-07	1.6743	2.2317e-15
CLIC2	1.7286	0.000321122	1.8019	7.31996e-05
LY96	1.6975	8.28568e-10	1.2445	6.87848e-06
LOC105377621	1.6032	7.82956e-08	1.122	0.275847
SPP1	1.5952	2.36543e-49	2.0287	7.12481e-67
DNAJB4	1.5631	1.03007e-21	1.7019	2.40014e-16
HSPB8	1.56	1.37974e-59	1.665	1.71302e-08
LOC105375924	1.5454	0.000551157	1.0743	0.058591
PHEX	1.5442	9.0741e-32	1.3535	1.77705e-09
MLLT11	1.5412	5.59932e-52	2.4898	3.27163e-42
CCL20	1.5392	8.92377e-05	1.1601	0.0881388
TXNRD1	1.4697	2.30787e-109	1.1709	1.09732e-46
PRNP	1.4535	1.1228e-69	1.0286	4.07403e-35
CRISPLD2	1.4514	0.000411558	1.7511	1.69191e-09
NFKB2	1.4196	1.78319e-10	1.3321	1.00465e-17
VSIG10L	1.4104	7.93721e-10	1.2225	0.127552
GSR	1.396	1.03286e-91	1.0059	4.92376e-28
SQSTM1	1.3884	4.73799e-11	1.0505	6.52735e-22
GAB3	1.3021	8.89081e-14	1.1297	0.000445054
RAB5IF	1.2935	5.27522e-13	1.1977	5.41855e-13
C2CD4D-AS1	1.2781	0.000345575	1.4088	0.152943
ABHD3	1.2585	1.18928e-20	1.1611	3.08241e-09
GLRX	1.2435	2.10515e-12	1.3038	1.44154e-20
AMIGO2	1.2417	7.54873e-26	1.4684	0.00123141
LINC00520	1.2333	2.37416e-10	1.2708	1.39027e-28
PTPRR	1.2163	2.80631e-08	1.4821	1.59897e-08
NRCAM	1.2025	7.94727e-13	2.6537	6.426e-09
GABARAPL1	1.1936	4.314e-33	1.1614	1.98262e-17
IFRD1	1.1645	1.1002e-27	1.5129	4.39961e-30
NQO1	1.1534	2.40806e-24	1.3745	4.89071e-43
LOC107986820	1.1511	4.65837e-05	1.9656	1.70932e-74
SNORA2C	1.1199	0.00990325	1.6485	0.000266991
RELB	1.0971	5.47908e-06	1.8036	2.28531e-08
SLC6A6	1.0748	8.84683e-13	1.1221	1.03755e-10
MAP3K14	1.0729	0.000601103	1.0609	0.00062629
RNFT1-DT	1.0615	0.0237534	1.2054	0.135554
TFPI2	1.0508	6.40285e-15	1.9704	7.56675e-55
POPDC3	1.0412	9.36938e-23	1.2151	1.15919e-13

## Sheet: Common_DEG_DN
MM27/MM13 Common Downregulated DEGs Auranofin vs DMSO | log2FC < -1
Total common genes: 41 | Sorted by MM27 log2FC
Gene	MM27 log2FC	MM27 Adj P-value	MM13 log2FC	MM13 Adj P-value
NEURL1B	-3.3742	2.40525e-17	-3.2164	2.9351e-24
MKI67	-2.3364	9.19369e-07	-1.9941	0.0001324
MTSS1	-2.1025	8.1538e-13	-1.2116	1.0369e-06
PLCXD3	-1.9383	2.64008e-08	-1.2435	4.8483e-13
PIGAP1	-1.9356	8.59567e-09	-1.7121	0.00424599
PLK1	-1.845	2.97966e-14	-2.2477	4.118e-24
BMF	-1.8234	5.12756e-17	-1.0476	6.4282e-06
KIF20A	-1.7643	1.50756e-63	-2.3737	6.9393e-67
ADCY1	-1.7348	5.42481e-13	-1.7533	0.070192
TRIM63	-1.7293	3.51701e-15	-1.6961	0.0982392
CXCL14	-1.7149	0.000265049	-1.3498	0.224739
E2F8	-1.5987	2.2498e-13	-2.5136	9.4925e-10
SORL1	-1.592	4.29183e-21	-2.0831	0.00022071
GDPD5	-1.5593	0.0003849	-1.1156	0.00998559
MOB3B	-1.5561	6.84758e-12	-1.1069	0.197344
LOC105369151	-1.4904	5.89328e-10	-1.0593	0.100455
GTSE1	-1.4704	5.48536e-16	-1.7555	1.855e-42
CELSR2	-1.4644	6.68278e-05	-1.0126	0.0379058
CCNF	-1.4552	3.30173e-12	-1.748	1.1689e-27
CENPF	-1.4288	1.60085e-30	-1.4751	2.2211e-37
FOXD3	-1.4169	2.79743e-12	-1.2925	0.331981
GLI3	-1.3667	0.00341761	-1.1031	0.00992483
FAM167B	-1.3661	0.00604387	-1.3373	0.0103575
SAPCD2	-1.3635	4.63515e-05	-1.5015	1.2546e-07
STARD4-AS1	-1.3497	2.76011e-07	-1.149	0.0152354
IGFBP5	-1.3316	3.129e-14	-1.334	4.731e-09
NREP	-1.2623	3.95032e-46	-1.2149	2.7839e-17
CYFIP2	-1.2532	3.40833e-13	-1.0296	0.00014246
SELENON	-1.2518	6.92295e-05	-1.0759	0.0605884
CENPA	-1.2491	3.62127e-29	-1.7425	5.6483e-32
LRATD2	-1.2402	8.49052e-20	-1.2023	9.1435e-38
MYB	-1.2002	0.000356606	-2.298	1.1918e-05
PTTG2	-1.0873	0.00136983	-1.3845	2.049e-05
TPX2	-1.0675	1.9197e-14	-1.3396	2.4578e-19
ST8SIA1	-1.063	1.2154e-11	-1.1938	0.0481814
PSRC1	-1.0493	3.21958e-10	-1.1413	5.3388e-15
CDCA8	-1.0447	8.18121e-16	-1.7212	9.4307e-13
KIT	-1.0351	1.66734e-06	-3.1372	7.187e-21
MATN2	-1.033	2.83988e-26	-1.2513	1.2513e-08
EDIL3-DT	-1.033	0.00992163	-1.089	0.278206
NAT8L	-1.0287	0.00165349	-2.698	0.00279352

## Sheet: Reactome_UP
Reactome Pathways 2024 | Common Upregulated DEGs (MM27 Aur & MM13 Aur) | Sorted by Adjusted P-value | Bold = shown in figure
Top 20 sig. → orange | Other sig. → yellow | Bold = in figure (6) | Significant (adj.p<0.05): 29/351
Term	Overlap	Overlap (%)	P-value	Adjusted P-value	Odds Ratio	Combined Score	Genes
NFE2L2 Regulating Anti-Oxidant Detoxification Enzymes	8/19	42.11	6.6979e-15	2.35096e-12	183.218	5979.67	NQO1;SRXN1;TXNRD1;GSR;HMOX1;SLC7A11;TXN;GCLM
Nuclear Events Mediated by NFE2L2	9/87	10.34	1.41923e-10	2.49076e-08	29.3417	665.345	NQO1;SRXN1;TXNRD1;GSR;HMOX1;SLC7A11;TXN;GCLM;SQSTM1
KEAP1-NFE2L2 Pathway	9/119	7.56	2.39131e-09	2.79783e-07	20.7724	412.361	NQO1;SRXN1;TXNRD1;GSR;HMOX1;SLC7A11;TXN;GCLM;SQSTM1
Cellular Response to Chemical Stress	9/202	4.46	2.37724e-07	2.08603e-05	11.7896	179.816	NQO1;SRXN1;TXNRD1;GSR;HMOX1;SLC7A11;TXN;GCLM;SQSTM1
Interconversion of Nucleotide Di- and Triphosphates	4/30	13.33	8.39489e-06	0.000589321	36.8619	430.838	TXNRD1;GSR;GLRX;TXN
Cellular Responses to Stress	13/787	1.65	3.41251e-05	0.00199632	4.344	44.6801	NQO1;CXCL8;SRXN1;HSPB8;TXNRD1;GSR;LY96;SLC7A11;TXN;TUBA4A;HMOX1;GCLM;SQSTM1
The NLRP3 Inflammasome	3/17	17.65	5.17292e-05	0.00259385	50.7628	501.002	HMOX1;TXN;NFKB2
Cellular Responses to Stimuli	13/887	1.47	0.000114993	0.00504533	3.8269	34.7122	NQO1;CXCL8;SRXN1;HSPB8;TXNRD1;GSR;LY96;SLC7A11;TXN;TUBA4A;HMOX1;GCLM;SQSTM1
Cytokine Signaling in Immune System	12/776	1.55	0.000131197	0.00506357	4.0103	35.847	CXCL8;CCL20;HMOX1;GAB3;IL13RA2;CXCL2;SQSTM1;MAP3K14;TUBA4A;BIRC3;RELB;NFKB2
Nucleotide-binding Domain, Leucine Rich Repeat Containing Receptor (NLR) Signaling Pathways	4/61	6.56	0.000144261	0.00506357	16.788	148.471	HMOX1;TXN;BIRC3;NFKB2
Inflammasomes	3/25	12	0.00017062	0.00544432	32.2906	280.156	HMOX1;TXN;NFKB2
Cell Recruitment (Pro-Inflammatory Response)	3/27	11.11	0.000215625	0.00582186	29.5967	249.855	HMOX1;TXN;NFKB2
Purinergic Signaling in Leishmaniasis Infection	3/27	11.11	0.000215625	0.00582186	29.5967	249.855	HMOX1;TXN;NFKB2
Detoxification of Reactive Oxygen Species	3/36	8.33	0.000511681	0.0128286	21.5152	163.038	TXNRD1;GSR;TXN
TNFR2 Non-Canonical NF-kB Pathway	4/88	4.55	0.000589641	0.0137976	11.3764	84.5946	MAP3K14;BIRC3;RELB;NFKB2
Metabolism of Nucleotides	4/98	4.08	0.000883789	0.0191112	10.161	71.4449	TXNRD1;GSR;GLRX;TXN
Retinoid Metabolism and Transport	3/44	6.82	0.000925612	0.0191112	17.3101	120.912	AKR1B10;AKR1C1;AKR1C3
NIK-->noncanonical NF-kB Signaling	3/46	6.52	0.00105429	0.0194767	16.5033	113.128	MAP3K14;RELB;NFKB2
Interleukin-10 Signaling	3/46	6.52	0.00105429	0.0194767	16.5033	113.128	CXCL8;CCL20;CXCL2
Metabolism of Fat-Soluble Vitamins	3/48	6.25	0.00119376	0.0209504	15.7683	106.131	AKR1B10;AKR1C1;AKR1C3
Dectin-1 Mediated Noncanonical NF-kB Signaling	3/49	6.12	0.00126763	0.0211876	15.4247	102.892	MAP3K14;RELB;NFKB2
Synthesis of Bile Acids and Bile Salts via 24-Hydroxycholesterol	2/13	15.38	0.00141426	0.0225639	42.5711	279.315	AKR1C1;AKR1C3
Synthesis of Bile Acids and Bile Salts via 27-Hydroxycholesterol	2/14	14.29	0.00164532	0.025109	39.0216	250.121	AKR1C1;AKR1C3
Immune System	19/2150	0.88	0.00195053	0.0275667	2.3315	14.548	CXCL8;CCL20;LY96;GAB3;TXN;CLU;CXCL2;TUBA4A;RELB;NFKB2;CRISPLD2;HMOX1;IL13RA2;UNKL;SQSTM1;GLA;MAP3K14;AP1M2;BIRC3
Chemokine Receptors Bind Chemokines	3/57	5.26	0.00196344	0.0275667	13.1343	81.8666	CXCL8;CCL20;CXCL2
Heme Degradation	2/16	12.5	0.00215742	0.0291252	33.4437	205.305	ABCC2;HMOX1
TNF Receptor Superfamily (TNFSF) Members Mediating Non-Canonical NF-kB Pathway	2/17	11.76	0.00243818	0.0316964	31.2125	187.79	MAP3K14;BIRC3
Signaling by Interleukins	7/452	1.55	0.0035524	0.0445319	3.828	21.5903	CXCL8;CCL20;HMOX1;IL13RA2;CXCL2;SQSTM1;NFKB2
Insertion of Tail-Anchored Proteins Into the Endoplasmic Reticulum Membrane	2/22	9.09	0.00408331	0.0494221	23.4035	128.739	PRNP;HMOX1
IKK Complex Recruitment Mediated by RIP1	2/23	8.7	0.00445961	0.0504942	22.288	120.638	LY96;BIRC3
Synthesis of Bile Acids and Bile Salts via 7Alpha-Hydroxycholesterol	2/23	8.7	0.00445961	0.0504942	22.288	120.638	AKR1C1;AKR1C3
TP53 Regulates Metabolic Genes	3/86	3.49	0.00627378	0.0678235	8.5327	43.2725	TXNRD1;GSR;TXN
CLEC7A (Dectin-1) Signaling	3/87	3.45	0.00647768	0.0678235	8.4307	42.4856	MAP3K14;RELB;NFKB2
Metabolism of Porphyrins	2/28	7.14	0.0065698	0.0678235	17.9973	90.4412	ABCC2;HMOX1
Amino Acid Transport Across the Plasma Membrane	2/33	6.06	0.00904875	0.0876075	15.0907	71.0037	SLC6A6;SLC7A11
Synthesis of Bile Acids and Bile Salts	2/33	6.06	0.00904875	0.0876075	15.0907	71.0037	AKR1C1;AKR1C3
Visual Phototransduction	3/99	3.03	0.00923498	0.0876075	7.3724	34.5379	AKR1B10;AKR1C1;AKR1C3
Metabolic Disorders of Biological Oxidation Enzymes	2/34	5.88	0.00958733	0.0885566	14.6184	67.9362	GCLM;CYP19A1
Diseases Associated With the TLR Signaling Cascade	2/35	5.71	0.0101399	0.0889773	14.1747	65.08	LY96;NFKB2
Diseases of Immune System	2/35	5.71	0.0101399	0.0889773	14.1747	65.08	LY96;NFKB2
MyD88-independent TLR4 Cascade	3/110	2.73	0.0122814	0.102637	6.6108	29.0854	LY96;BIRC3;NFKB2
TRIF (TICAM1)-mediated TLR4 Signaling	3/110	2.73	0.0122814	0.102637	6.6108	29.0854	LY96;BIRC3;NFKB2
Interleukin-4 and Interleukin-13 Signaling	3/112	2.68	0.0128899	0.105218	6.4889	28.235	CXCL8;HMOX1;IL13RA2
Bile Acid and Bile Salt Metabolism	2/44	4.55	0.0157198	0.125401	11.1322	46.2302	AKR1C1;AKR1C3
Heme Signaling	2/47	4.26	0.017813	0.138941	10.3885	41.8431	LY96;HMOX1
C-type Lectin Receptors (CLRs)	3/131	2.29	0.0195274	0.149002	5.5204	21.7278	MAP3K14;RELB;NFKB2
Regulation of HMOX1 Expression and Activity	1/5	20	0.0215636	0.161039	57.875	222.052	HMOX1
Macroautophagy	3/143	2.1	0.0245268	0.171002	5.0441	18.7036	GABARAPL1;SQSTM1;TUBA4A
Metabolism	16/2181	0.73	0.0249549	0.171002	1.8474	6.8181	NQO1;ABCC2;ABHD3;AKR1C1;TXNRD1;GSR;AKR1C3;GLRX;TXN;CYP19A1;AKR1B10;KYNU;HMOX1;GCLM;GLA;RAB5IF
Estrogen Biosynthesis	1/6	16.67	0.0258208	0.171002	46.2977	169.291	CYP19A1
Protein Repair	1/6	16.67	0.0258208	0.171002	46.2977	169.291	TXN
RUNX3 Regulates Immune Response and Cell Migration	1/6	16.67	0.0258208	0.171002	46.2977	169.291	SPP1
Uptake and Function of Diphtheria Toxin	1/6	16.67	0.0258208	0.171002	46.2977	169.291	TXNRD1
Toll Like Receptor 4 (TLR4) Cascade	3/148	2.03	0.0267952	0.174165	4.869	17.6234	LY96;BIRC3;NFKB2
Innate Immune System	10/1149	0.87	0.0272908	0.174165	2.1406	7.7089	CRISPLD2;LY96;HMOX1;TXN;CLU;GLA;MAP3K14;BIRC3;RELB;NFKB2
Neurofascin Interactions	1/7	14.29	0.0300598	0.176399	38.5795	135.204	NRCAM
NrCAM Interactions	1/7	14.29	0.0300598	0.176399	38.5795	135.204	NRCAM
IkBA Variant Leads to EDA-ID	1/7	14.29	0.0300598	0.176399	38.5795	135.204	NFKB2
DEx H-box Helicases Activate Type I IFN and Inflammatory Cytokines Production	1/7	14.29	0.0300598	0.176399	38.5795	135.204	NFKB2
Metabolism of Steroids	3/155	1.94	0.0301536	0.176399	4.6431	16.2576	AKR1C1;AKR1C3;CYP19A1
Autophagy	3/158	1.9	0.0316579	0.182163	4.5525	15.7188	GABARAPL1;SQSTM1;TUBA4A
Terminal Pathway of Complement	1/8	12.5	0.0342805	0.194072	33.0664	111.539	CLU
Atorvastatin ADME	1/9	11.11	0.038483	0.20466	28.9317	94.2461	ABCC2
Phase 3 - Rapid Repolarisation	1/9	11.11	0.038483	0.20466	28.9317	94.2461	KCNE4
Interleukin-1 Processing	1/9	11.11	0.038483	0.20466	28.9317	94.2461	NFKB2
TRIF-mediated Programmed Cell Death	1/9	11.11	0.038483	0.20466	28.9317	94.2461	LY96
Toll-like Receptor Cascades	3/174	1.72	0.0403332	0.211298	4.1232	13.2379	LY96;BIRC3;NFKB2
Prednisone ADME	1/10	10	0.0426675	0.217048	25.7158	81.1157	AKR1C1
Regulation of FOXO Transcriptional Activity by Acetylation	1/10	10	0.0426675	0.217048	25.7158	81.1157	TXN
Nef Mediated Downregulation of MHC Class I Complex Cell Surface Expression	1/11	9.09	0.046834	0.231531	23.143	70.8442	AP1M2
Pexophagy	1/11	9.09	0.046834	0.231531	23.143	70.8442	SQSTM1
SUMOylation of Immune Response Proteins	1/12	8.33	0.0509825	0.24854	21.0381	62.615	NFKB2
NF-kB Is Activated and Signals Survival	1/13	7.69	0.0551132	0.249103	19.2839	55.8918	SQSTM1
p75NTR Recruits Signalling Complexes	1/13	7.69	0.0551132	0.249103	19.2839	55.8918	SQSTM1
Glutathione Synthesis and Recycling	1/13	7.69	0.0551132	0.249103	19.2839	55.8918	GCLM
Passive Transport by Aquaporins	1/13	7.69	0.0551132	0.249103	19.2839	55.8918	AQP3
Peptide Ligand-Binding Receptors	3/198	1.52	0.0553563	0.249103	3.6114	10.4511	CXCL8;CCL20;CXCL2
Metabolism of Vitamins and Cofactors	3/198	1.52	0.0553563	0.249103	3.6114	10.4511	AKR1B10;AKR1C1;AKR1C3
Selective Autophagy	2/89	2.25	0.0574254	0.254587	5.362	15.3207	SQSTM1;TUBA4A
Tryptophan Catabolism	1/14	7.14	0.0592261	0.254587	17.7996	50.3088	KYNU
Regulation of TBK1, IKK? (IKBKE)-mediated Activation of IRF3, IRF7	1/14	7.14	0.0592261	0.254587	17.7996	50.3088	LY96
Muscle Contraction	3/204	1.47	0.0594762	0.254587	3.5025	9.8846	MYBPC1;KCNE4;CLIC2
Phase 2 - Plateau Phase	1/15	6.67	0.0633213	0.26148	16.5274	45.6079	KCNE4
IRAK2 Mediated Activation of TAK1 Complex Upon TLR7 8 or 9 Stimulation	1/15	6.67	0.0633213	0.26148	16.5274	45.6079	LY96
Synthesis of Prostaglandins (PG) and Thromboxanes (TX)	1/15	6.67	0.0633213	0.26148	16.5274	45.6079	AKR1C3
p75NTR Signals via NF-kB	1/16	6.25	0.0673989	0.26883	15.4248	41.6026	SQSTM1
NRIF Signals Cell Death From the Nucleus	1/16	6.25	0.0673989	0.26883	15.4248	41.6026	SQSTM1
TRAF6-mediated Induction of TAK1 Complex Within TLR4 Complex	1/16	6.25	0.0673989	0.26883	15.4248	41.6026	LY96
Metabolism of Amino Acids and Derivatives	4/358	1.12	0.0708861	0.271009	2.6627	7.0474	NQO1;KYNU;TXNRD1;GSR
RIP-mediated NFkB Activation via ZBP1	1/17	5.88	0.071459	0.271009	14.46	38.1547	NFKB2
Interleukin-1 Signaling	2/102	1.96	0.0728827	0.271009	4.6619	12.209	SQSTM1;NFKB2
TRAF6 Mediated Induction of NFkB and MAP Kinases Upon TLR7 8 or 9 Activation	2/102	1.96	0.0728827	0.271009	4.6619	12.209	LY96;NFKB2
MyD88 Dependent Cascade Initiated on Endosome	2/103	1.94	0.0741223	0.271009	4.6155	12.0097	LY96;NFKB2
Activation of IRF3, IRF7 Mediated by TBK1, IKK? (IKBKE)	1/18	5.56	0.0755016	0.271009	13.6088	35.1596	LY96
Caspase Activation via Death Receptors in the Presence of Ligand	1/18	5.56	0.0755016	0.271009	13.6088	35.1596	LY96
Toll Like Receptor 3 (TLR3) Cascade	2/106	1.89	0.0778815	0.271009	4.4817	11.4398	BIRC3;NFKB2
Post-translational Protein Phosphorylation	2/107	1.87	0.0791478	0.271009	4.4388	11.2587	SPP1;AFP
Toll Like Receptor 7 8 (TLR7 8) Cascade	2/107	1.87	0.0791478	0.271009	4.4388	11.2587	LY96;NFKB2
Transport of Inorganic Cations Anions and Amino Acids Oligopeptides	2/107	1.87	0.0791478	0.271009	4.4388	11.2587	SLC6A6;SLC7A11
MyD88 Deficiency (TLR2 4)	1/19	5.26	0.0795268	0.271009	12.8521	32.5371	LY96
Na+ Cl- Dependent Neurotransmitter Transporters	1/19	5.26	0.0795268	0.271009	12.8521	32.5371	SLC6A6
TICAM1, RIP1-mediated IKK Complex Recruitment	1/19	5.26	0.0795268	0.271009	12.8521	32.5371	BIRC3
Microtubule-dependent Trafficking of Connexons From Golgi to the Plasma Membrane	1/19	5.26	0.0795268	0.271009	12.8521	32.5371	TUBA4A
Drug ADME	2/109	1.83	0.0816998	0.274025	4.3554	10.9089	ABCC2;AKR1C1
Toll Like Receptor 9 (TLR9) Cascade	2/110	1.82	0.0829853	0.274025	4.3148	10.74	LY96;NFKB2
IRAK4 Deficiency (TLR2 4)	1/20	5	0.0835346	0.274025	12.175	30.2244	LY96
Transport of Connexons to the Plasma Membrane	1/20	5	0.0835346	0.274025	12.175	30.2244	TUBA4A
ZBP1(DAI) Mediated Induction of Type I IFNs	1/21	4.76	0.0875252	0.274496	11.5657	28.1721	NFKB2
CD209 (DC-SIGN) Signaling	1/21	4.76	0.0875252	0.274496	11.5657	28.1721	RELB
MyD88 MAL(TIRAP) Cascade Initiated on Plasma Membrane	2/115	1.74	0.0895052	0.274496	4.1229	9.9503	LY96;NFKB2
Toll Like Receptor TLR6 TLR2 Cascade	2/115	1.74	0.0895052	0.274496	4.1229	9.9503	LY96;NFKB2
Parasitic Infection Pathways	3/245	1.22	0.0912485	0.274496	2.903	6.9504	HMOX1;TXN;NFKB2
Leishmania Infection	3/245	1.22	0.0912485	0.274496	2.903	6.9504	HMOX1;TXN;NFKB2
Nef-mediates Down Modulation of Cell Surface Receptors by Recruiting Them to Clathrin Adapters	1/22	4.55	0.0914987	0.274496	11.0144	26.3402	AP1M2
Post-chaperonin Tubulin Folding Pathway	1/22	4.55	0.0914987	0.274496	11.0144	26.3402	TUBA4A
RA Biosynthesis Pathway	1/22	4.55	0.0914987	0.274496	11.0144	26.3402	AKR1C3
Regulation of TLR by Endogenous Ligand	1/22	4.55	0.0914987	0.274496	11.0144	26.3402	LY96
Toll Like Receptor 2 (TLR2) Cascade	2/118	1.69	0.0934881	0.275751	4.0156	9.5167	LY96;NFKB2
Toll Like Receptor TLR1 TLR2 Cascade	2/118	1.69	0.0934881	0.275751	4.0156	9.5167	LY96;NFKB2
Transport of Small Molecules	6/724	0.83	0.0954729	0.278978	1.9803	4.6515	SLC6A6;ABCC2;HMOX1;SLC7A11;CLIC2;AQP3
L1CAM Interactions	2/120	1.67	0.0961718	0.278978	3.9472	9.2427	NRCAM;TUBA4A
Selenoamino Acid Metabolism	2/122	1.64	0.0988774	0.283637	3.881	8.9801	TXNRD1;GSR
CD28 Dependent PI3K Akt Signaling	1/24	4.17	0.0993943	0.283637	10.0556	23.215	MAP3K14
Regulation of IGF Transport and Uptake by Insulin-like Growth Factor Binding Proteins (IGFBPs)	2/124	1.61	0.101605	0.285544	3.817	8.7281	SPP1;AFP
Formation of Tubulin Folding Intermediates by CCT TriC	1/25	4	0.103317	0.285544	9.6361	21.8736	TUBA4A
Basigin Interactions	1/25	4	0.103317	0.285544	9.6361	21.8736	SLC7A11
TRAF6 Mediated NF-kB Activation	1/25	4	0.103317	0.285544	9.6361	21.8736	NFKB2
MHC Class II Antigen Presentation	2/126	1.59	0.104352	0.286154	3.755	8.4863	TUBA4A;AP1M2
Platelet Degranulation	2/128	1.56	0.107121	0.28729	3.6951	8.254	CLU;TUBA4A
Endogenous Sterols	1/26	3.85	0.107222	0.28729	9.2502	20.6544	CYP19A1
TNFR1-induced Proapoptotic Signaling	1/26	3.85	0.107222	0.28729	9.2502	20.6544	BIRC3
Cardiac Conduction	2/130	1.54	0.109909	0.290352	3.6369	8.0308	KCNE4;CLIC2
Prefoldin Mediated Transfer of Substrate to CCT TriC	1/27	3.7	0.111111	0.290352	8.894	19.5422	TUBA4A
Metabolism of Lipids	6/758	0.79	0.112361	0.290352	1.8874	4.1259	ABHD3;AKR1C1;TXNRD1;AKR1C3;CYP19A1;GLA
Response to Elevated Platelet Cytosolic Ca2+	2/133	1.5	0.114127	0.290352	3.5531	7.7119	CLU;TUBA4A
ATF4 Activates Genes in Response to Endoplasmic Reticulum Stress	1/28	3.57	0.114983	0.290352	8.5642	18.5241	CXCL8
Activation of AMPK Downstream of NMDARs	1/28	3.57	0.114983	0.290352	8.5642	18.5241	TUBA4A
Caspase Activation via Extrinsic Apoptotic Signalling Pathway	1/28	3.57	0.114983	0.290352	8.5642	18.5241	LY96
Synthesis of PC	1/28	3.57	0.114983	0.290352	8.5642	18.5241	ABHD3
The Role of Nef in HIV-1 Replication and Disease Pathogenesis	1/29	3.45	0.118838	0.297943	8.2579	17.5893	AP1M2
Paracetamol ADME	1/30	3.33	0.122676	0.304116	7.9727	16.7284	ABCC2
Interleukin-1 Family Signaling	2/140	1.43	0.124127	0.304116	3.3717	7.0349	SQSTM1;NFKB2
Sealing of the Nuclear Envelope (NE) by ESCRT-III	1/31	3.23	0.126498	0.304116	7.7066	15.9336	TUBA4A
Signaling by CSF1 (M-CSF) in Myeloid Cells	1/31	3.23	0.126498	0.304116	7.7066	15.9336	GAB3
Interaction Between L1 and Ankyrins	1/31	3.23	0.126498	0.304116	7.7066	15.9336	NRCAM
RHO GTPases Activate IQGAPs	1/31	3.23	0.126498	0.304116	7.7066	15.9336	TUBA4A
Respiratory Syncytial Virus (RSV) Attachment and Entry	1/32	3.12	0.130304	0.304912	7.4576	15.1978	LY96
PINK1-PRKN Mediated Mitophagy	1/32	3.12	0.130304	0.304912	7.4576	15.1978	SQSTM1
Cooperation of Prefoldin and TriC CCT in Actin and Tubulin Folding	1/32	3.12	0.130304	0.304912	7.4576	15.1978	TUBA4A
Regulation of Necroptotic Cell Death	1/32	3.12	0.130304	0.304912	7.4576	15.1978	BIRC3
PERK Regulates Gene Expression	1/33	3.03	0.134093	0.30965	7.2242	14.515	CXCL8
TNFR1-induced NF-kappa-B Signaling Pathway	1/33	3.03	0.134093	0.30965	7.2242	14.515	BIRC3
RIPK1-mediated Regulated Necrosis	1/34	2.94	0.137866	0.316281	7.0049	13.8801	BIRC3
CD28 Co-Stimulation	1/35	2.86	0.141623	0.320707	6.7986	13.2884	MAP3K14
Lysosome Vesicle Biogenesis	1/35	2.86	0.141623	0.320707	6.7986	13.2884	AP1M2
Striated Muscle Contraction	1/36	2.78	0.145363	0.321326	6.604	12.7359	MYBPC1
Metabolism of Steroid Hormones	1/36	2.78	0.145363	0.321326	6.604	12.7359	CYP19A1
GPCR Ligand Binding	4/467	0.86	0.14608	0.321326	2.0245	3.8944	CXCL8;CCL20;CXCL2;PTHLH
NOD1 2 Signaling Pathway	1/37	2.7	0.149088	0.321326	6.4202	12.2191	BIRC3
Gap Junction Assembly	1/37	2.7	0.149088	0.321326	6.4202	12.2191	TUBA4A
Glutathione Conjugation	1/37	2.7	0.149088	0.321326	6.4202	12.2191	GCLM
HSF1-dependent Transactivation	1/37	2.7	0.149088	0.321326	6.4202	12.2191	HSPB8
Death Receptor Signaling	2/157	1.27	0.14922	0.321326	2.9993	5.7057	SQSTM1;BIRC3
Regulation of Ornithine Decarboxylase (ODC)	1/38	2.63	0.152796	0.327021	6.2464	11.7348	NQO1
Mitophagy	1/39	2.56	0.156488	0.330888	6.0817	11.2802	SQSTM1
Glycosphingolipid Catabolism	1/39	2.56	0.156488	0.330888	6.0817	11.2802	GLA
G Alpha (I) Signalling Events	3/316	0.95	0.15886	0.333892	2.2364	4.1144	CXCL8;CCL20;CXCL2
Protein Localization	2/164	1.22	0.159833	0.333938	2.8687	5.2601	PRNP;HMOX1
Signaling by Retinoic Acid	1/41	2.44	0.163825	0.339489	5.777	10.4504	AKR1C3
Cellular Senescence	2/167	1.2	0.164425	0.339489	2.8161	5.0839	CXCL8;TXN
NCAM1 Interactions	1/42	2.38	0.16747	0.343177	5.6358	10.071	PRNP
Aggrephagy	1/43	2.33	0.171099	0.343177	5.5014	9.7128	TUBA4A
Aspirin ADME	1/43	2.33	0.171099	0.343177	5.5014	9.7128	ABCC2
Assembly and Cell Surface Presentation of NMDA Receptors	1/43	2.33	0.171099	0.343177	5.5014	9.7128	TUBA4A
Vasopressin Regulates Renal Water Homeostasis via Aquaporins	1/43	2.33	0.171099	0.343177	5.5014	9.7128	AQP3
Degradation of DVL	1/44	2.27	0.174713	0.346465	5.3732	9.3741	HECW1
Uptake and Actions of Bacterial Toxins	1/44	2.27	0.174713	0.346465	5.3732	9.3741	TXNRD1
Class A 1 (Rhodopsin-like Receptors)	3/333	0.9	0.176892	0.347706	2.1194	3.6712	CXCL8;CCL20;CXCL2
Carboxyterminal Post-Translational Modifications of Tubulin	1/45	2.22	0.178311	0.347706	5.2508	9.0536	TUBA4A
TAK1-dependent IKK and NF-kappa-B Activation	1/45	2.22	0.178311	0.347706	5.2508	9.0536	NFKB2
PKMTs Methylate Histone Lysines	1/46	2.17	0.181893	0.350794	5.1339	8.7498	NFKB2
Metabolism of Polyamines	1/46	2.17	0.181893	0.350794	5.1339	8.7498	NQO1
Gap Junction Trafficking	1/48	2.08	0.189012	0.358612	4.9149	8.1879	TUBA4A
Complex IV Assembly	1/48	2.08	0.189012	0.358612	4.9149	8.1879	RAB5IF
Recycling Pathway of L1	1/48	2.08	0.189012	0.358612	4.9149	8.1879	TUBA4A
Regulation of TNFR1 Signaling	1/50	2	0.196069	0.370001	4.7138	7.6802	BIRC3
Gap Junction Trafficking and Regulation	1/51	1.96	0.199575	0.372611	4.6193	7.4443	TUBA4A
Transcriptional and Post-Translational Regulation of MITF-M Expression and Activity	1/51	1.96	0.199575	0.372611	4.6193	7.4443	TFEC
Aquaporin-mediated Transport	1/52	1.92	0.203066	0.375137	4.5285	7.2195	AQP3
COPI-independent Golgi-to-ER Retrograde Traffic	1/52	1.92	0.203066	0.375137	4.5285	7.2195	TUBA4A
Intraflagellar Transport	1/53	1.89	0.206541	0.37956	4.4412	7.0049	TUBA4A
Transcriptional Regulation by TP53	3/362	0.83	0.208863	0.381827	1.9453	3.0465	TXNRD1;GSR;TXN
Ion Homeostasis	1/54	1.85	0.210002	0.381921	4.3572	6.8	CLIC2
Golgi Associated Vesicle Biogenesis	1/56	1.79	0.216879	0.390382	4.1983	6.4168	AP1M2
HSP90 Chaperone Cycle for Steroid Hormone Receptors (SHR) in the Presence of Ligand	1/56	1.79	0.216879	0.390382	4.1983	6.4168	TUBA4A
Programmed Cell Death	2/202	0.99	0.219398	0.392902	2.3192	3.5179	LY96;BIRC3
Signaling by PDGF	1/58	1.72	0.223696	0.394585	4.0506	6.0656	SPP1
Glycosphingolipid Metabolism	1/58	1.72	0.223696	0.394585	4.0506	6.0656	GLA
Arachidonate Metabolism	1/59	1.69	0.227083	0.394585	3.9806	5.9009	AKR1C3
TNF Signaling	1/59	1.69	0.227083	0.394585	3.9806	5.9009	BIRC3
Cytoprotection by HMOX1	1/59	1.69	0.227083	0.394585	3.9806	5.9009	HMOX1
Iron Uptake and Transport	1/59	1.69	0.227083	0.394585	3.9806	5.9009	HMOX1
Regulated Necrosis	1/61	1.64	0.233813	0.404277	3.8475	5.5913	BIRC3
Kinesins	1/62	1.61	0.237156	0.408048	3.7842	5.4456	TUBA4A
NCAM Signaling for Neurite Out-Growth	1/63	1.59	0.240485	0.411757	3.723	5.3056	PRNP
Cytosolic Sensors of Pathogen-Associated DNA	1/64	1.56	0.243799	0.413008	3.6637	5.171	NFKB2
ABC Transporter Disorders	1/65	1.54	0.247099	0.413008	3.6063	5.0415	ABCC2
O-linked Glycosylation of Mucins	1/65	1.54	0.247099	0.413008	3.6063	5.0415	GCNT3
Cytochrome P450 - Arranged by Substrate Type	1/65	1.54	0.247099	0.413008	3.6063	5.0415	CYP19A1
The Role of GTSE1 in G2 M Progression After G2 Checkpoint	1/65	1.54	0.247099	0.413008	3.6063	5.0415	TUBA4A
Biological Oxidations	2/222	0.9	0.251513	0.418394	2.1062	2.9071	GCLM;CYP19A1
FOXO-mediated Transcription	1/67	1.49	0.253656	0.419969	3.4967	4.7966	TXN
Loss of Nlp From Mitotic Centrosomes	1/69	1.45	0.260157	0.426707	3.3935	4.5692	TUBA4A
Loss of Proteins Required for Interphase Microtubule Organization From the Centrosome	1/69	1.45	0.260157	0.426707	3.3935	4.5692	TUBA4A
Translocation of SLC2A4 (GLUT4) to the Plasma Membrane	1/71	1.41	0.266602	0.435244	3.2962	4.3575	TUBA4A
AURKA Activation by TPX2	1/72	1.39	0.269804	0.436411	3.2496	4.2572	TUBA4A
trans-Golgi Network Vesicle Budding	1/72	1.39	0.269804	0.436411	3.2496	4.2572	AP1M2
Nuclear Envelope (NE) Reassembly	1/75	1.33	0.279326	0.449741	3.1174	3.9758	TUBA4A
Cell Death Signalling via NRAGE, NRIF and NADE	1/76	1.32	0.282473	0.452731	3.0757	3.8882	SQSTM1
Costimulation by the CD28 Family	1/78	1.28	0.288726	0.458769	2.9955	3.7212	MAP3K14
PKR-mediated Signaling	1/80	1.25	0.294925	0.458769	2.9193	3.5646	TUBA4A
Post NMDA Receptor Activation Events	1/80	1.25	0.294925	0.458769	2.9193	3.5646	TUBA4A
ER-Phagosome Pathway	1/80	1.25	0.294925	0.458769	2.9193	3.5646	LY96
SLC-mediated Transmembrane Transport	2/249	0.8	0.295039	0.458769	1.8734	2.2868	SLC6A6;SLC7A11
GPCR Downstream Signalling	4/633	0.63	0.296703	0.458769	1.4775	1.7952	CXCL8;CCL20;CXCL2;PTHLH
Senescence-Associated Secretory Phenotype (SASP)	1/81	1.23	0.298004	0.458769	2.8827	3.4899	CXCL8
Centrosome Maturation	1/81	1.23	0.298004	0.458769	2.8827	3.4899	TUBA4A
Recruitment of Mitotic Centrosome Proteins and Complexes	1/81	1.23	0.298004	0.458769	2.8827	3.4899	TUBA4A
Post-translational Protein Modification	8/1457	0.55	0.299719	0.459394	1.2904	1.5548	UCHL1;SPP1;GCNT3;AFP;SQSTM1;TUBA4A;BIRC3;NFKB2
UCH Proteinases	1/82	1.22	0.30107	0.459459	2.847	3.4175	UCHL1
Transport of Bile Salts and Organic Acids, Metal Ions and Amine Compounds	1/84	1.19	0.307163	0.466728	2.7781	3.2792	SLC6A6
Integrin Cell Surface Interactions	1/85	1.18	0.310189	0.468301	2.7449	3.2131	SPP1
DDX58 IFIH1-mediated Induction of Interferon-Alpha Beta	1/86	1.16	0.313203	0.468301	2.7124	3.1489	NFKB2
Transcriptional Regulation by RUNX3	1/86	1.16	0.313203	0.468301	2.7124	3.1489	SPP1
Adaptive Immune System	5/854	0.59	0.314268	0.468301	1.3692	1.5848	LY96;UNKL;MAP3K14;TUBA4A;AP1M2
Platelet Activation, Signaling and Aggregation	2/262	0.76	0.31591	0.468301	1.7786	2.0494	CLU;TUBA4A
Regulation of PLK1 Activity at G2 M Transition	1/87	1.15	0.316203	0.468301	2.6808	3.0866	TUBA4A
Diseases of Metabolism	2/264	0.76	0.319111	0.470621	1.7648	2.0158	GCLM;CYP19A1
Disease	11/2131	0.52	0.320931	0.471325	1.2148	1.3806	ABCC2;TXNRD1;LY96;HMOX1;TXN;GCLM;SQSTM1;CYP19A1;TUBA4A;AP1M2;NFKB2
ABC-family Proteins Mediated Transport	1/90	1.11	0.325127	0.472109	2.59	2.91	ABCC2
Deubiquitination	2/268	0.75	0.325502	0.472109	1.7379	1.9506	UCHL1;BIRC3
Chaperonin-mediated Protein Folding	1/91	1.1	0.328076	0.472109	2.5611	2.8544	TUBA4A
Activation of NMDA Receptors and Postsynaptic Events	1/93	1.08	0.333936	0.472109	2.5052	2.7477	TUBA4A
Signaling by ALK Fusions and Activated Point Mutants	1/93	1.08	0.333936	0.472109	2.5052	2.7477	SQSTM1
Signaling by ALK in Cancer	1/93	1.08	0.333936	0.472109	2.5052	2.7477	SQSTM1
Oxidative Stress Induced Senescence	1/94	1.06	0.336847	0.472109	2.4781	2.6965	TXN
Class B 2 (Secretin Family Receptors)	1/94	1.06	0.336847	0.472109	2.4781	2.6965	PTHLH
RAC3 GTPase Cycle	1/94	1.06	0.336847	0.472109	2.4781	2.6965	AMIGO2
Recruitment of NuMA to Mitotic Centrosomes	1/94	1.06	0.336847	0.472109	2.4781	2.6965	TUBA4A
Antimicrobial Peptides	1/95	1.05	0.339745	0.472109	2.4516	2.6467	CLU
Unfolded Protein Response (UPR)	1/95	1.05	0.339745	0.472109	2.4516	2.6467	CXCL8
Antigen processing-Cross Presentation	1/96	1.04	0.342631	0.472109	2.4257	2.5982	LY96
Infectious Disease	7/1311	0.53	0.344259	0.472109	1.2487	1.3316	TXNRD1;LY96;HMOX1;TXN;TUBA4A;AP1M2;NFKB2
Anchoring of the Basal Body to the Plasma Membrane	1/97	1.03	0.345504	0.472109	2.4003	2.5509	TUBA4A
Protein Folding	1/97	1.03	0.345504	0.472109	2.4003	2.5509	TUBA4A
MyD88 Cascade Initiated on Plasma Membrane	1/98	1.02	0.348365	0.472109	2.3754	2.5049	NFKB2
P75 NTR Receptor-Mediated Signalling	1/98	1.02	0.348365	0.472109	2.3754	2.5049	SQSTM1
Toll Like Receptor 10 (TLR10) Cascade	1/98	1.02	0.348365	0.472109	2.3754	2.5049	NFKB2
Toll Like Receptor 5 (TLR5) Cascade	1/98	1.02	0.348365	0.472109	2.3754	2.5049	NFKB2
Hedgehog 'Off' State	1/99	1.01	0.351214	0.474138	2.3511	2.4601	TUBA4A
COPI-dependent Golgi-to-ER Retrograde Traffic	1/101	0.99	0.356874	0.476284	2.3038	2.3738	TUBA4A
COPI-mediated Anterograde Transport	1/101	0.99	0.356874	0.476284	2.3038	2.3738	TUBA4A
Cellular Response to Heat Stress	1/101	0.99	0.356874	0.476284	2.3038	2.3738	HSPB8
Phase I - Functionalization of Compounds	1/105	0.95	0.368048	0.488717	2.2148	2.2138	CYP19A1
Signaling by GPCR	4/706	0.57	0.368975	0.488717	1.3188	1.3149	CXCL8;CCL20;CXCL2;PTHLH
Sphingolipid Metabolism	1/107	0.93	0.373563	0.491089	2.1728	2.1395	GLA
Stimuli-sensing Channels	1/107	0.93	0.373563	0.491089	2.1728	2.1395	CLIC2
RSV-host Interactions	1/109	0.92	0.379031	0.496417	2.1323	2.0686	LY96
Phase II - Conjugation of Compounds	1/111	0.9	0.384451	0.501644	2.0933	2.0011	GCLM
O-linked Glycosylation	1/114	0.88	0.392494	0.510242	2.0375	1.9055	GCNT3
EML4 and NUDC in Mitotic Spindle Formation	1/116	0.86	0.397798	0.515229	2.0018	1.8453	TUBA4A
PPARA Activates Gene Expression	1/117	0.85	0.400433	0.516735	1.9845	1.8162	TXNRD1
Regulation of Lipid Metabolism by PPARalpha	1/119	0.84	0.405668	0.521574	1.9506	1.7599	TXNRD1
Axon Guidance	3/541	0.55	0.419515	0.537408	1.2862	1.1172	PRNP;NRCAM;TUBA4A
Resolution of Sister Chromatid Cohesion	1/126	0.79	0.42364	0.538759	1.8407	1.581	TUBA4A
Host Interactions of HIV Factors	1/126	0.79	0.42364	0.538759	1.8407	1.581	AP1M2
Glycerophospholipid Biosynthesis	1/128	0.78	0.428675	0.54124	1.8116	1.5345	ABHD3
Regulation of Complement Cascade	1/128	0.78	0.428675	0.54124	1.8116	1.5345	CLU
Respiratory Syncytial Virus Infection Pathway	1/133	0.75	0.441073	0.554899	1.7425	1.4263	LY96
Golgi-to-ER Retrograde Transport	1/135	0.74	0.445958	0.557544	1.7163	1.386	TUBA4A
Signaling by Hedgehog	1/136	0.74	0.448384	0.557544	1.7035	1.3664	TUBA4A
MITF-M-regulated Melanocyte Development	1/136	0.74	0.448384	0.557544	1.7035	1.3664	TFEC
Nervous System Development	3/567	0.53	0.44953	0.557544	1.2252	0.9796	PRNP;NRCAM;TUBA4A
Complement Cascade	1/139	0.72	0.455601	0.561108	1.6662	1.3099	CLU
RHO GTPases Activate Formins	1/139	0.72	0.455601	0.561108	1.6662	1.3099	TUBA4A
Degradation of the Extracellular Matrix	1/140	0.71	0.457986	0.562073	1.6542	1.2918	SPP1
Bacterial Infection Pathways	1/143	0.7	0.465078	0.568789	1.619	1.2394	TXNRD1
Class I MHC Mediated Antigen Processing & Presentation	2/373	0.54	0.484624	0.590636	1.2394	0.8978	LY96;UNKL
ER to Golgi Anterograde Transport	1/155	0.65	0.492541	0.598002	1.4919	1.0565	TUBA4A
Respiratory Electron Transport	1/158	0.63	0.499187	0.598002	1.4632	1.0166	RAB5IF
Factors Involved in Megakaryocyte Development and Platelet Production	1/158	0.63	0.499187	0.598002	1.4632	1.0166	TUBA4A
Antiviral Mechanism by IFN-stimulated Genes	1/158	0.63	0.499187	0.598002	1.4632	1.0166	TUBA4A
G Alpha (S) Signalling Events	1/158	0.63	0.499187	0.598002	1.4632	1.0166	PTHLH
Disorders of Transmembrane Transporters	1/164	0.61	0.51222	0.611528	1.4089	0.9426	ABCC2
Apoptosis	1/168	0.6	0.520722	0.619571	1.3749	0.8972	LY96
SUMO E3 Ligases SUMOylate Target Proteins	1/170	0.59	0.524918	0.622453	1.3585	0.8756	NFKB2
Sensory Perception	3/640	0.47	0.530177	0.626572	1.0807	0.6858	AKR1B10;AKR1C1;AKR1C3
Fatty Acid Metabolism	1/176	0.57	0.537289	0.63073	1.3115	0.8147	AKR1C3
SUMOylation	1/176	0.57	0.537289	0.63073	1.3115	0.8147	NFKB2
Separation of Sister Chromatids	1/177	0.56	0.53932	0.631004	1.304	0.8051	TUBA4A
Metabolism of Proteins	9/2067	0.44	0.550673	0.638831	1.0011	0.5973	UCHL1;SPP1;GCNT3;AFP;TXN;SQSTM1;TUBA4A;BIRC3;NFKB2
G2 M Transition	1/184	0.54	0.55329	0.638831	1.2537	0.742	TUBA4A
RAC1 GTPase Cycle	1/184	0.54	0.55329	0.638831	1.2537	0.742	AMIGO2
Ion Channel Transport	1/184	0.54	0.55329	0.638831	1.2537	0.742	CLIC2
Mitotic G2-G2 M Phases	1/186	0.54	0.557204	0.639145	1.24	0.7252	TUBA4A
Transport to the Golgi and Subsequent Modification	1/186	0.54	0.557204	0.639145	1.24	0.7252	TUBA4A
TCF Dependent Signaling in Response to WNT	1/189	0.53	0.563011	0.643703	1.22	0.7008	HECW1
Ub-specific Processing Proteases	1/190	0.53	0.56493	0.6438	1.2135	0.693	BIRC3
Cilium Assembly	1/200	0.5	0.583668	0.663002	1.1519	0.6202	TUBA4A
Mitotic Prometaphase	1/203	0.49	0.589132	0.664588	1.1346	0.6003	TUBA4A
Neurotransmitter Receptors and Postsynaptic Signal Transmission	1/204	0.49	0.590938	0.664588	1.129	0.5939	TUBA4A
Intra-Golgi and Retrograde Golgi-to-ER Traffic	1/204	0.49	0.590938	0.664588	1.129	0.5939	TUBA4A
HCMV Early Events	1/205	0.49	0.592736	0.664588	1.1234	0.5875	TUBA4A
Signal Transduction	11/2613	0.42	0.594531	0.664588	0.9629	0.5007	CXCL8;CCL20;HECW1;AMIGO2;SPP1;AKR1C3;CXCL2;SQSTM1;TUBA4A;PTHLH;BIRC3
Hemostasis	3/707	0.42	0.598232	0.666601	0.9745	0.5007	SLC7A11;CLU;TUBA4A
Phospholipid Metabolism	1/211	0.47	0.603359	0.670187	1.091	0.5512	ABHD3
Neutrophil Degranulation	2/478	0.42	0.61903	0.684537	0.9608	0.4608	CRISPLD2;GLA
Mitotic Anaphase	1/221	0.45	0.62046	0.684537	1.0409	0.4968	TUBA4A
Mitotic Metaphase and Anaphase	1/222	0.45	0.622129	0.684537	1.0361	0.4917	TUBA4A
HIV Infection	1/227	0.44	0.630368	0.691435	1.0129	0.4674	AP1M2
Cell Surface Interactions at the Vascular Wall	1/233	0.43	0.640021	0.699389	0.9864	0.4402	SLC7A11
Neddylation	1/234	0.43	0.641605	0.699389	0.9821	0.4359	SQSTM1
Chromatin Modifying Enzymes	1/238	0.42	0.647874	0.701863	0.9654	0.419	NFKB2
Chromatin Organization	1/238	0.42	0.647874	0.701863	0.9654	0.419	NFKB2
HCMV Infection	1/259	0.39	0.679049	0.732646	0.8858	0.3429	TUBA4A
Aerobic Respiration and Respiratory Electron Transport	1/260	0.38	0.680464	0.732646	0.8824	0.3397	RAB5IF
Transmission Across Chemical Synapses	1/269	0.37	0.692919	0.742957	0.8524	0.3127	TUBA4A
Signaling by Nuclear Receptors	1/270	0.37	0.694273	0.742957	0.8491	0.3098	AKR1C3
Interferon Signaling	1/280	0.36	0.707493	0.754803	0.8183	0.2832	TUBA4A
Signaling by WNT	1/287	0.35	0.716409	0.761999	0.798	0.2661	HECW1
RHO GTPase Effectors	1/291	0.34	0.721383	0.764971	0.7868	0.257	TUBA4A
Antigen Processing Ubiquitination & Proteasome Degradation	1/296	0.34	0.727479	0.76807	0.7733	0.246	UNKL
Organelle Biogenesis and Maintenance	1/297	0.34	0.728682	0.76807	0.7706	0.2439	TUBA4A
Extracellular Matrix Organization	1/300	0.33	0.73226	0.769531	0.7628	0.2377	SPP1
Asparagine N-linked Glycosylation	1/306	0.33	0.739278	0.774586	0.7475	0.2258	TUBA4A
Membrane Trafficking	2/633	0.32	0.766483	0.800701	0.719	0.1912	TUBA4A;AP1M2
Generic Transcription Pathway	4/1230	0.33	0.790374	0.823209	0.7346	0.1728	TXNRD1;GSR;SPP1;TXN
Signaling by Rho GTPases	2/672	0.3	0.794871	0.825443	0.6758	0.1551	AMIGO2;TUBA4A
M Phase	1/372	0.27	0.805435	0.831685	0.6125	0.1325	TUBA4A
Signaling by Rho GTPases, Miro GTPases and RHOBTB3	2/688	0.29	0.80562	0.831685	0.6595	0.1425	AMIGO2;TUBA4A
Viral Infection Pathways	3/1029	0.29	0.83171	0.856101	0.6574	0.1211	LY96;TUBA4A;AP1M2
Neuronal System	1/411	0.24	0.836412	0.858423	0.5531	0.0988	TUBA4A
Vesicle-mediated Transport	2/752	0.27	0.843823	0.863504	0.6012	0.1021	TUBA4A;AP1M2
RNA Polymerase II Transcription	4/1360	0.29	0.851146	0.868466	0.6595	0.1063	TXNRD1;GSR;SPP1;TXN
Developmental Biology	4/1385	0.29	0.860982	0.873066	0.6467	0.0968	PRNP;TFEC;NRCAM;TUBA4A
RHO GTPase Cycle	1/450	0.22	0.862505	0.873066	0.5041	0.0746	AMIGO2
Diseases of Signal Transduction by Growth Factor Receptors and Second Messengers	1/451	0.22	0.863117	0.873066	0.5029	0.074	SQSTM1
Cell Cycle, Mitotic	1/516	0.19	0.897615	0.905353	0.438	0.0473	TUBA4A
Signaling by Receptor Tyrosine Kinases	1/536	0.19	0.906385	0.911579	0.4212	0.0414	SPP1
Gene Expression (Transcription)	4/1615	0.25	0.928384	0.931037	0.5475	0.0407	TXNRD1;GSR;SPP1;TXN
Cell Cycle	1/649	0.15	0.943653	0.943653	0.3457	0.02	TUBA4A

## Sheet: WikiPathways_UP
WikiPathways 2024 Human | Common Upregulated DEGs (MM27 Aur & MM13 Aur) | Sorted by Adjusted P-value | Bold = shown in figure
Top 20 sig. → orange | Other sig. → yellow | Bold = in figure (4) | Significant (adj.p<0.05): 36/207
Term	Overlap	Overlap (%)	P-value	Adjusted P-value	Odds Ratio	Combined Score	Genes
Nuclear Receptors Meta Pathway WP2882	15/314	4.78	5.91462e-12	1.22433e-09	13.6664	353.325	NQO1;ABCC2;SRXN1;CCL20;TXNRD1;AMIGO2;GSR;SLC7A11;TXN;NFKB2;SLC6A6;HMOX1;GCLM;SQSTM1;BIRC3
NRF2 Pathway WP2884	11/141	7.8	2.55406e-11	2.64345e-09	22.0256	537.221	NQO1;SLC6A6;ABCC2;SRXN1;TXNRD1;GSR;HMOX1;SLC7A11;TXN;GCLM;SQSTM1
Ferroptosis WP4313	7/65	10.77	1.30822e-08	9.02672e-07	29.9537	543.719	PRNP;TXNRD1;AKR1C1;AKR1C3;HMOX1;SLC7A11;GCLM
Photodynamic Therapy Induced NFE2L2 NRF2 Survival Signaling WP3612	5/23	21.74	4.38555e-08	2.26952e-06	67.395	1141.83	NQO1;ABCC2;SRXN1;HMOX1;GCLM
Antiviral And Anti-Inflam Effects Of Nrf2 On SARS CoV 2 Pathway WP5113	5/31	16.13	2.15479e-07	8.92083e-06	46.6393	715.932	NQO1;CXCL8;HMOX1;SLC7A11;GCLM
Photodynamic Therapy Induced NF kB Survival Signaling WP3617	5/35	14.29	4.06107e-07	1.29958e-05	40.4126	594.738	CXCL8;CXCL2;RELB;NFKB2;BIRC3
Transcriptional Activation By NRF2 In Response To Phytochemicals WP3	4/15	26.67	4.39473e-07	1.29958e-05	87.1939	1276.32	NQO1;HMOX1;SLC7A11;GCLM
NRF2 ARE Regulation WP4357	4/23	17.39	2.77625e-06	6.38537e-05	50.4604	645.611	NQO1;HMOX1;SLC7A11;GCLM
Ebstein Barr Virus LMP1 Signaling WP262	4/23	17.39	2.77625e-06	6.38537e-05	50.4604	645.611	CXCL8;CCL20;MAP3K14;NFKB2
Oxidative Stress Response WP408	4/33	12.12	1.24108e-05	0.000256904	33.0436	373.292	NQO1;TXNRD1;GSR;HMOX1
TNF Related Weak Inducer Of Apoptosis TWEAK Signaling WP2036	4/38	10.53	2.20197e-05	0.000414371	28.1772	302.16	MAP3K14;RELB;NFKB2;BIRC3
Selenium Micronutrient Network WP15	5/86	5.81	3.66097e-05	0.000631517	14.9292	152.505	KYNU;TXNRD1;GSR;TXN;NFKB2
FGF23 Signaling In Hypophosphatemic Rickets Related Disorders WP4790	3/23	13.04	0.000132206	0.00210512	35.5232	317.263	SPP1;PHEX;NFKB2
Lung Fibrosis WP3624	4/63	6.35	0.00016358	0.00241865	16.2173	141.386	CXCL8;SPP1;HMOX1;CXCL2
Glucocorticoid Receptor Pathway WP2880	4/70	5.71	0.000246037	0.00323376	14.4922	120.43	CCL20;AMIGO2;BIRC3;NFKB2
Overview Of Proinflammatory And Profibrotic Mediators WP5095	5/129	3.88	0.000249953	0.00323376	9.731	80.7114	CXCL8;CCL20;SPP1;CXCL2;CCL26
miRNA Role In Immune Response In Sepsis WP4329	3/37	8.11	0.000555086	0.00675899	20.8813	156.534	CXCL8;RELB;NFKB2
TNF Alpha Signaling WP231	4/89	4.49	0.000615357	0.0070766	11.242	83.1153	TXN;MAP3K14;BIRC3;NFKB2
Benzo A Pyrene Metabolism WP696	2/9	22.22	0.000660165	0.00719232	66.9109	489.99	AKR1C1;AKR1C3
Metapathway Biotransformation Phase I And II WP702	5/183	2.73	0.00122397	0.012198	6.7604	45.333	AKR1B10;AKR1C1;GSR;AKR1C3;CYP19A1
Hepatitis C And Hepatocellular Carcinoma WP3646	3/49	6.12	0.00126763	0.012198	15.4247	102.892	UCHL1;CXCL8;BIRC3
RANKL RANK Signaling WP2018	3/50	6	0.00134433	0.012198	15.0957	99.8109	SQSTM1;RELB;NFKB2
Male Steroid Hormones In Cardiomyocyte Energy Metabolism WP5320	2/13	15.38	0.00141426	0.012198	42.5711	279.315	AKR1C3;CYP19A1
Osteopontin Signaling WP1434	2/13	15.38	0.00141426	0.012198	42.5711	279.315	SPP1;MAP3K14
Mineralocorticoid Biosynthesis WP5279	2/14	14.29	0.00164532	0.0130993	39.0216	250.121	AKR1C1;AKR1C3
Glucocorticoid Biosynthesis WP5280	2/14	14.29	0.00164532	0.0130993	39.0216	250.121	AKR1C1;AKR1C3
Glutathione Metabolism WP100	2/19	10.53	0.0030484	0.0225364	27.5377	159.53	GSR;GCLM
Overview Of Nanoparticle Effects WP3287	2/19	10.53	0.0030484	0.0225364	27.5377	159.53	CXCL8;HMOX1
Non Genomic Actions Of 1 25 Dihydroxyvitamin D3 WP4341	3/76	3.95	0.00444584	0.0307713	9.7065	52.5681	CXCL8;RELB;NFKB2
LDL Influence On CD14 And TLR4 WP5272	2/23	8.7	0.00445961	0.0307713	22.288	120.638	RELB;NFKB2
Estrogen Metabolism WP5276	2/24	8.33	0.00485133	0.0321299	21.2738	113.358	AKR1C3;CYP19A1
Network Map Of SARS CoV 2 Signaling WP5115	5/254	1.97	0.00503866	0.0321299	4.8154	25.4762	CXCL8;CCL20;CXCL2;NFKB2;CCL26
Cytokine Cytokine Receptor Interaction WP5473	5/255	1.96	0.00512216	0.0321299	4.7959	25.2942	CXCL8;CCL20;IL13RA2;CXCL2;CCL26
Toll Like Receptor Signaling Related To MyD88 WP3858	2/31	6.45	0.00801399	0.0474454	16.1331	77.8673	RELB;NFKB2
Toll Like Receptor Signaling WP75	3/95	3.16	0.00825138	0.0474454	7.6945	36.9133	CXCL8;SPP1;LY96
Complement System WP2806	3/95	3.16	0.00825138	0.0474454	7.6945	36.9133	PRNP;SPP1;TXN
Neovascularization Processes WP4331	2/37	5.41	0.0112863	0.0614806	13.3634	59.9235	RELB;NFKB2
Thymic Stromal Lymphopoietin TSLP Signaling WP2203	2/37	5.41	0.0112863	0.0614806	13.3634	59.9235	RELB;NFKB2
Immune Infiltration In Pancreatic Cancer WP5285	2/39	5.13	0.012487	0.0662773	12.6397	55.4008	CXCL8;CCL20
Catabolism Of Skeletal Muscle In Cachexia WP5474	2/40	5	0.0131074	0.067831	12.3065	53.3435	RELB;NFKB2
Prostaglandin Synthesis And Regulation WP98	2/45	4.44	0.016405	0.0828253	10.8728	44.6889	AKR1C1;AKR1C3
IL26 Signaling WP5347	2/48	4.17	0.0185356	0.091354	10.1621	40.5273	CXCL8;CCL20
Osteoarthritic Chondrocyte Hypertrophy WP5373	2/50	4	0.0200173	0.0963624	9.7377	38.0859	SPP1;RELB
Apoptosis Related Network Due To Altered Notch3 Ovarian Cancer WP2864	2/53	3.77	0.0223296	0.100003	9.1636	34.8384	NQO1;SQSTM1
NRP1 Triggered Signaling In Pancreatic Cancer WP5144	2/53	3.77	0.0223296	0.100003	9.1636	34.8384	RELB;NFKB2
MAPK Signaling WP382	4/246	1.63	0.0224682	0.100003	3.9174	14.8689	PTPRR;MAP3K14;RELB;NFKB2
IL1 Signaling WP195	2/54	3.7	0.0231238	0.100003	8.9869	33.8526	SQSTM1;MAP3K14
Cancer Pathways WP5434	6/507	1.18	0.023189	0.100003	2.8701	10.8033	NQO1;CXCL8;TXNRD1;HMOX1;BIRC3;NFKB2
Pathogenic Escherichia Coli Infection WP2272	2/55	3.64	0.0239296	0.10109	8.8169	32.9102	LY96;TUBA4A
Benzene Metabolism WP3891	1/6	16.67	0.0258208	0.106898	46.2977	169.291	NQO1
mRNA Protein And Metabolite Inducation Pathway By Cyclosporin A WP3953	1/7	14.29	0.0300598	0.11798	38.5795	135.204	SLC7A11
Amino Acid Metabolism In Triple Negative Breast Cancer Cells WP5213	1/7	14.29	0.0300598	0.11798	38.5795	135.204	SLC7A11
Endochondral Ossification WP474	2/63	3.17	0.0307775	0.11798	7.6575	26.6555	SPP1;PTHLH
Endochondral Ossification With Skeletal Dysplasias WP4808	2/63	3.17	0.0307775	0.11798	7.6575	26.6555	SPP1;PTHLH
SARS CoV 2 Innate Immunity Evasion And Cell Immune Response WP5039	2/66	3.03	0.0335225	0.124492	7.2974	24.7787	CXCL8;CXCL2
ApoE And miR 146 In Inflammation And Atherosclerosis WP3926	1/8	12.5	0.0342805	0.124492	33.0664	111.539	NFKB2
NAD Biosynthesis II From Tryptophan WP2485	1/8	12.5	0.0342805	0.124492	33.0664	111.539	KYNU
Trans Sulfuration One Carbon Metabolism And Related Pathways WP2525	2/69	2.9	0.0363595	0.129766	6.9696	23.0994	GSR;GCLM
Steroid Hormone Precursor Biosynthesis WP5277	1/9	11.11	0.038483	0.135017	28.9317	94.2461	AKR1C1
Trans Sulfuration Pathway WP2333	1/10	10	0.0426675	0.14479	25.7158	81.1157	GCLM
Interleukin 1 Induced Activation Of NF kB WP3656	1/10	10	0.0426675	0.14479	25.7158	81.1157	SQSTM1
Inclusion Body Myositis WP5120	1/11	9.09	0.046834	0.153883	23.143	70.8442	NFKB2
IDO Metabolic Pathway WP5414	1/11	9.09	0.046834	0.153883	23.143	70.8442	KYNU
MAPK And NFkB Signaling Inhibited By Yersinia YopJ WP3849	1/12	8.33	0.0509825	0.157513	21.0381	62.615	MAP3K14
Irinotecan Pathway WP229	1/12	8.33	0.0509825	0.157513	21.0381	62.615	ABCC2
Enterohepatic Circulation Of Bile Acids WP5396	1/12	8.33	0.0509825	0.157513	21.0381	62.615	ABCC2
IL10 Anti Inflammatory Signaling WP4495	1/12	8.33	0.0509825	0.157513	21.0381	62.615	HMOX1
Vitamin K Metabolism And Activation Of Dependent Proteins WP5186	1/13	7.69	0.0551132	0.161834	19.2839	55.8918	NQO1
Dopamine Metabolism WP2436	1/13	7.69	0.0551132	0.161834	19.2839	55.8918	NQO1
EDA Signaling In Hair Follicle Development WP3930	1/13	7.69	0.0551132	0.161834	19.2839	55.8918	RELB
Focal Adhesion WP306	3/199	1.51	0.0560331	0.161834	3.5927	10.3536	STYK1;SPP1;BIRC3
Orexin Receptor Pathway WP5094	2/88	2.27	0.05629	0.161834	5.4246	15.6079	CXCL8;CXCL2
Apoptosis Modulation And Signaling WP1772	2/89	2.25	0.0574254	0.162659	5.362	15.3207	MAP3K14;BIRC3
Codeine And Morphine Metabolism WP1604	1/14	7.14	0.0592261	0.162659	17.7996	50.3088	ABCC2
Sulfatase And Aromatase Pathway WP5368	1/14	7.14	0.0592261	0.162659	17.7996	50.3088	CYP19A1
Amino Acid Metabolism WP3925	2/91	2.2	0.0597203	0.162659	5.241	14.7695	GSR;GCLM
Pro Survival Signaling Of Neuroprotectin D1 WP5182	1/15	6.67	0.0633213	0.168045	16.5274	45.6079	BIRC3
COVID 19 Adverse Outcome Pathway WP4891	1/15	6.67	0.0633213	0.168045	16.5274	45.6079	CXCL8
Classcl Pathway Steroidogenesis W Glucocort Mineralocort Metab WP4523	1/16	6.25	0.0673989	0.168091	15.4248	41.6026	CYP19A1
Osteoclast Signaling WP12	1/16	6.25	0.0673989	0.168091	15.4248	41.6026	SPP1
Tryptophan Catabolism Leading To NAD Production WP4210	1/16	6.25	0.0673989	0.168091	15.4248	41.6026	KYNU
8Q11 23 RB1CC1 Copy Number Variation WP5412	1/16	6.25	0.0673989	0.168091	15.4248	41.6026	GABARAPL1
Sulfation Biotransformation Reaction WP692	1/16	6.25	0.0673989	0.168091	15.4248	41.6026	GSR
Cells And Molecules Involved In Acute Inflammatory Response WP4493	1/17	5.88	0.071459	0.172	14.46	38.1547	CXCL8
Degradation Pathway Of Sphingolipids Including Diseases WP4153	1/17	5.88	0.071459	0.172	14.46	38.1547	GLA
Drug Induction Of Bile Acid Pathway WP2289	1/17	5.88	0.071459	0.172	14.46	38.1547	ABCC2
Interactions Between LOXL4 And Oxidative Stress Pathway WP3670	1/18	5.56	0.0755016	0.1776	13.6088	35.1596	NQO1
Estrogen Metabolism WP697	1/18	5.56	0.0755016	0.1776	13.6088	35.1596	NQO1
Extracellular Vesicles In The Crosstalk Of Cardiac Cells WP4300	1/19	5.26	0.0795268	0.180902	12.8521	32.5371	SPP1
Cholestasis WP5238	1/19	5.26	0.0795268	0.180902	12.8521	32.5371	ABCC2
LTF Danger Signal Response Pathway WP4478	1/19	5.26	0.0795268	0.180902	12.8521	32.5371	CXCL8
Macrophage Stimulating Protein MSP Signaling WP5353	2/108	1.85	0.0804206	0.180946	4.3967	11.0817	CXCL8;CXCL2
CAMKK2 Pathway WP4874	2/110	1.82	0.0829853	0.182018	4.3148	10.74	HMOX1;SQSTM1
Autophagy In Pancreatic Ductal Adenocarcinoma WP5331	1/20	5	0.0835346	0.182018	12.175	30.2244	SQSTM1
Hypertrophy Model WP516	1/20	5	0.0835346	0.182018	12.175	30.2244	IFRD1
HDAC6 Interactions In The Central Nervous System WP5426	2/112	1.79	0.085575	0.183007	4.2359	10.4135	SQSTM1;TUBA4A
Glycosphingolipid Metabolism WP5292	1/21	4.76	0.0875252	0.183007	11.5657	28.1721	GLA
Pathogenesis Of SARS CoV 2 Mediated By Nsp9 Nsp10 Complex WP4884	1/21	4.76	0.0875252	0.183007	11.5657	28.1721	CXCL8
FOXA2 Pathway WP5066	1/21	4.76	0.0875252	0.183007	11.5657	28.1721	ABCC2
Gastrin Signaling WP4659	2/115	1.74	0.0895052	0.185276	4.1229	9.9503	CXCL8;BIRC3
Methionine De Novo And Salvage Pathway WP3580	1/22	4.55	0.0914987	0.187527	11.0144	26.3402	TXN
Spinal Cord Injury WP2431	2/119	1.68	0.0948271	0.189992	3.9811	9.3783	CXCL8;CXCL2
Post COVID Neuroinflammation WP5485	1/23	4.35	0.095455	0.189992	10.5132	24.6966	CXCL8
Eicosanoid Synthesis WP167	1/23	4.35	0.095455	0.189992	10.5132	24.6966	AKR1C3
Regulation Of Apoptosis By Parathyroid Hormone Related Protein WP3872	1/24	4.17	0.0993943	0.1941	10.0556	23.215	PTHLH
Kynurenine Pathway And Links To Cell Senescence WP5044	1/24	4.17	0.0993943	0.1941	10.0556	23.215	KYNU
Relationship Between Inflammation COX 2 And EGFR WP4483	1/25	4	0.103317	0.199874	9.6361	21.8736	CYP19A1
Cytokines And Inflammatory Response WP530	1/26	3.85	0.107222	0.205509	9.2502	20.6544	CXCL2
Ebola Virus Infection In Host WP4217	2/129	1.55	0.108512	0.206074	3.6658	8.1413	RELB;NFKB2
FGFR3 Signal Chondrocyte Proliferation Terminal Differentiation WP4767	1/27	3.7	0.111111	0.207206	8.894	19.5422	PTHLH
Intracellular Trafficking Proteins Involved In CMT Neuropathy WP4856	1/27	3.7	0.111111	0.207206	8.894	19.5422	HSPB8
TLR4 Signaling And Tolerance WP3851	1/28	3.57	0.114983	0.210632	8.5642	18.5241	CXCL8
Interactions Immune Cells And miRNAs In Tumor Microenvironment WP4559	1/28	3.57	0.114983	0.210632	8.5642	18.5241	NFKB2
Disorders Of Bile Acid Synthesis And Biliary Transport WP5176	1/29	3.45	0.118838	0.213908	8.2579	17.5893	ABCC2
One Carbon Metabolism WP241	1/29	3.45	0.118838	0.213908	8.2579	17.5893	GLRX
Oligodendrocyte Differentiation Leading To Myelin For CNS WP4304	1/30	3.33	0.122676	0.218562	7.9727	16.7284	CXCL2
Constitutive Androstane Receptor Pathway WP2875	1/31	3.23	0.126498	0.218562	7.7066	15.9336	ABCC2
Pregnane X Receptor Pathway WP2876	1/32	3.12	0.130304	0.218562	7.4576	15.1978	ABCC2
Prion Disease Pathway WP3995	1/32	3.12	0.130304	0.218562	7.4576	15.1978	PRNP
IL17 Signaling WP2112	1/32	3.12	0.130304	0.218562	7.4576	15.1978	MAP3K14
Male Infertility WP4673	2/145	1.38	0.131396	0.218562	3.253	6.6021	NQO1;CLU
Prostaglandin Signaling WP5088	1/33	3.03	0.134093	0.218562	7.2242	14.515	CXCL8
Tryptophan Metabolism WP465	1/33	3.03	0.134093	0.218562	7.2242	14.515	KYNU
Nuclear Receptors In Lipid Metabolism And Toxicity WP299	1/33	3.03	0.134093	0.218562	7.2242	14.515	ABCC2
Mitochondrial Immune Response To SARS CoV 2 WP5038	1/33	3.03	0.134093	0.218562	7.2242	14.515	NFKB2
Resistin As A Regulator Of Inflammation WP4481	1/33	3.03	0.134093	0.218562	7.2242	14.515	CXCL8
Signal Transduction Through IL1R WP4496	1/33	3.03	0.134093	0.218562	7.2242	14.515	MAP3K14
Influence Of Laminopathies On Wnt Signaling WP4844	1/35	2.86	0.141623	0.229031	6.7986	13.2884	SPP1
Vitamin D Sensitive Calcium Signaling In Depression WP4698	1/36	2.78	0.145363	0.233258	6.604	12.7359	GSR
Sudden Infant Death Syndrome SIDS Susceptibility Pathways WP706	2/157	1.27	0.14922	0.237604	2.9993	5.7057	CXCL8;NFKB2
Striated Muscle Contraction Pathway WP383	1/38	2.63	0.152796	0.239612	6.2464	11.7348	MYBPC1
Parkinson 39 S Disease Pathway WP2371	1/38	2.63	0.152796	0.239612	6.2464	11.7348	UCHL1
Ovarian Infertility WP34	1/39	2.56	0.156488	0.243557	6.0817	11.2802	CYP19A1
Bladder Cancer WP2828	1/40	2.5	0.160165	0.247419	5.9255	10.8528	CXCL8
Chemokine Signaling WP3929	2/165	1.21	0.161361	0.247421	2.851	5.2005	CCL20;CCL26
Fibrin Complement Receptor 3 Signaling WP4136	1/43	2.33	0.171099	0.260423	5.5014	9.7128	LY96
Perturbations Host Cell Autophagy Induced By SARS CoV 2 Prots WP4936	1/44	2.27	0.174713	0.262069	5.3732	9.3741	SQSTM1
Vasopressin Regulated Water Reabsorption WP5085	1/44	2.27	0.174713	0.262069	5.3732	9.3741	AQP3
Aryl Hydrocarbon Receptor Pathway WP2873	1/45	2.22	0.178311	0.265542	5.2508	9.0536	NQO1
Aryl Hydrocarbon Receptor Pathway WP2586	1/46	2.17	0.181893	0.268942	5.1339	8.7498	NQO1
Selenium Metabolism And Selenoproteins WP28	1/47	2.13	0.18546	0.272271	5.022	8.4616	TXNRD1
Pancreatic Cancer Subtypes WP5390	1/48	2.08	0.189012	0.273604	4.9149	8.1879	ANXA10
Omega 6 Fatty Acids In Senescence WP5424	1/48	2.08	0.189012	0.273604	4.9149	8.1879	AKR1C3
IL3 Signaling WP286	1/49	2.04	0.192548	0.274879	4.8123	7.9278	CXCL8
Interleukin 1 IL 1 Structural Pathway WP2637	1/49	2.04	0.192548	0.274879	4.8123	7.9278	MAP3K14
Vitamin D Receptor Pathway WP2877	2/186	1.08	0.193998	0.275052	2.5229	4.1373	SPP1;PTHLH
Copper Homeostasis WP3286	1/51	1.96	0.199575	0.281034	4.6193	7.4443	PRNP
TGF Beta Receptor Signaling WP560	1/54	1.85	0.210002	0.291748	4.3572	6.8	SPP1
Vitamin B12 Metabolism WP1533	1/54	1.85	0.210002	0.291748	4.3572	6.8	NFKB2
Cardiac Hypertrophic Response WP2795	1/55	1.82	0.213448	0.292607	4.2763	6.6041	MAP3K14
Overlap Between Signal Transduction Pathways LMNA Laminopathies WP4879	1/55	1.82	0.213448	0.292607	4.2763	6.6041	SPP1
ADHD And Autism ASD Pathways WP5420	3/370	0.81	0.217908	0.296756	1.9021	2.8982	KYNU;AKR1C1;AKR1C3
Proximal Tubule Transport WP4917	1/57	1.75	0.220295	0.296828	4.1231	6.2374	ABCC2
Pre Implantation Embryo WP3527	1/58	1.72	0.223696	0.296828	4.0506	6.0656	AQP3
TGF Beta Receptor Signaling In Skeletal Dysplasias WP4816	1/58	1.72	0.223696	0.296828	4.0506	6.0656	SPP1
Complement And Coagulation Cascades WP558	1/58	1.72	0.223696	0.296828	4.0506	6.0656	CLU
Dengue 2 Interactions With Complement And Coagulation Cascades WP3896	1/59	1.69	0.227083	0.299403	3.9806	5.9009	CLU
Novel Intracellular Components Of RIG I Like Receptor Pathway WP3865	1/60	1.67	0.230455	0.301173	3.9129	5.7429	CXCL8
Modulators Of TCR Signaling And T Cell Activation WP5072	1/61	1.64	0.233813	0.301173	3.8475	5.5913	MAP3K14
T Cell Antigen Receptor TCR Pathway During Staph A. Infection WP3863	1/62	1.61	0.237156	0.301173	3.7842	5.4456	MAP3K14
Proteasome Degradation WP183	1/62	1.61	0.237156	0.301173	3.7842	5.4456	UCHL1
TAR Syndrome WP5362	1/62	1.61	0.237156	0.301173	3.7842	5.4456	TXN
TYROBP Causal Network In Microglia WP3945	1/62	1.61	0.237156	0.301173	3.7842	5.4456	SPP1
Oxidation By Cytochrome P450 WP43	1/63	1.59	0.240485	0.303539	3.723	5.3056	CYP19A1
3Q29 Copy Number Variation Syndrome WP4906	1/64	1.56	0.243799	0.305857	3.6637	5.171	TM4SF19
Folate Metabolism WP176	1/69	1.45	0.260157	0.32247	3.3935	4.5692	NFKB2
Urotensin II Mediated Signaling WP5158	1/69	1.45	0.260157	0.32247	3.3935	4.5692	HMOX1
Parkin Ubiquitin Proteasomal System Pathway WP2359	1/71	1.41	0.266602	0.328492	3.2962	4.3575	TUBA4A
Head And Neck Squamous Cell Carcinoma WP4674	1/73	1.37	0.272992	0.334306	3.2043	4.1602	NFKB2
Affected Pathways In Duchenne Muscular Dystrophy WP5356	1/74	1.35	0.276166	0.334306	3.1602	4.0665	SPP1
Burn Wound Healing WP5055	1/74	1.35	0.276166	0.334306	3.1602	4.0665	CXCL8
T Cell Receptor Signaling WP69	1/75	1.33	0.279326	0.336166	3.1174	3.9758	MAP3K14
VEGFA VEGFR2 Signaling WP3888	3/430	0.7	0.287839	0.344408	1.6298	2.0297	CXCL8;DNAJB4;TXN
Clock Controlled Autophagy In Bone Metabolism WP5205	1/80	1.25	0.294925	0.350859	2.9193	3.5646	SQSTM1
MicroRNAs In Cardiomyocyte Hypertrophy WP1544	1/83	1.2	0.304123	0.359734	2.8121	3.3473	MAP3K14
Apoptosis WP254	1/84	1.19	0.307163	0.360726	2.7781	3.2792	BIRC3
Acute Viral Myocarditis WP4298	1/85	1.18	0.310189	0.360726	2.7449	3.2131	NFKB2
Clear Cell Renal Cell Carcinoma Pathways WP4018	1/85	1.18	0.310189	0.360726	2.7449	3.2131	SQSTM1
Allograft Rejection WP2328	1/90	1.11	0.325127	0.375985	2.59	2.91	CXCL8
P53 Transcriptional Gene Network WP4963	1/91	1.1	0.328076	0.377287	2.5611	2.8544	SLC7A11
Corticotropin Releasing Hormone Signaling WP2355	1/92	1.09	0.331012	0.378561	2.5328	2.8003	CXCL8
Small Cell Lung Cancer WP4658	1/95	1.05	0.339745	0.386413	2.4516	2.6467	BIRC3
Neural Crest Differentiation WP2064	1/101	0.99	0.356874	0.403677	2.3038	2.3738	NFKB2
7Q11 23 Copy Number Variation Syndrome WP4932	1/104	0.96	0.365273	0.410932	2.2364	2.2523	SQSTM1
Complement System In Neuronal Development And Plasticity WP5090	1/106	0.94	0.370812	0.414908	2.1936	2.1762	CLU
DNA Damage Response Only ATM Dependent WP710	1/109	0.92	0.379031	0.421825	2.1323	2.0686	NFKB2
Senescence Associated Secretory Phenotype SASP WP3391	1/113	0.88	0.389825	0.431517	2.0558	1.9366	CXCL8
Angiopoietin Like Protein 8 Regulatory Pathway WP3915	1/132	0.76	0.438615	0.482943	1.7559	1.4471	MAP3K14
Primary Ovarian Insufficiency WP5461	1/136	0.74	0.448384	0.485945	1.7035	1.3664	CYP19A1
Measles Virus Infection WP4630	1/136	0.74	0.448384	0.485945	1.7035	1.3664	NFKB2
2Q37 Copy Number Variation Syndrome WP5224	1/136	0.74	0.448384	0.485945	1.7035	1.3664	GABARAPL1
Brain Derived Neurotrophic Factor BDNF Signaling WP2380	1/137	0.73	0.4508	0.486019	1.6909	1.3472	SQSTM1
Endoderm Differentiation WP2853	1/140	0.71	0.457986	0.488675	1.6542	1.2918	PTHLH
Neuroinflammation And Glutamatergic Signaling WP5083	1/140	0.71	0.457986	0.488675	1.6542	1.2918	NFKB2
Hepatitis B Infection WP4666	1/151	0.66	0.483545	0.513302	1.532	1.1132	CXCL8
Breast Cancer Pathway WP4262	1/154	0.65	0.490307	0.515196	1.5017	1.0703	NFKB2
Nonalcoholic Fatty Liver Disease WP4396	1/154	0.65	0.490307	0.515196	1.5017	1.0703	CXCL8
Smith Magenis And Potocki Lupski Syndrome Copy Number Variation WP5381	1/156	0.64	0.494766	0.517255	1.4822	1.043	MAP3K14
EGF EGFR Signaling WP437	1/159	0.63	0.501382	0.521194	1.4539	1.0037	PTPRR
Insulin Signaling WP481	1/160	0.62	0.503569	0.521194	1.4446	0.9911	MAP3K14
Primary Ovarian Insufficiency WP5316	1/170	0.59	0.524918	0.540587	1.3585	0.8756	CYP19A1
Circadian Rhythm Genes WP3594	1/201	0.5	0.585497	0.59999	1.1461	0.6135	RELB
Ciliary Landscape WP4352	1/215	0.47	0.610289	0.622314	1.0704	0.5286	GLA
Alzheimer 39 S Disease WP5124	1/261	0.38	0.681872	0.688524	0.8789	0.3366	TUBA4A
Alzheimer 39 S Disease And miRNA Effects WP2059	1/261	0.38	0.681872	0.688524	0.8789	0.3366	TUBA4A
Focal Adhesion PI3K Akt mTOR Signaling WP3932	1/303	0.33	0.735792	0.739364	0.7551	0.2317	SPP1
PI3K Akt Signaling WP4172	1/338	0.3	0.773744	0.773744	0.6755	0.1733	SPP1

## Sheet: KEGG_UP
KEGG 2021 Human | Common Upregulated DEGs (MM27 Aur & MM13 Aur) | Sorted by Adjusted P-value | Bold = shown in figure
Top 20 sig. → orange | Other sig. → yellow | Bold = in figure (6) | Significant (adj.p<0.05): 12/103
Term	Overlap	Overlap (%)	P-value	Adjusted P-value	Odds Ratio	Combined Score	Genes
NF-kappa B signaling pathway	7/104	6.73	3.48218e-07	3.58665e-05	17.8753	265.813	CXCL8;LY96;CXCL2;MAP3K14;BIRC3;RELB;NFKB2
Ferroptosis	4/41	9.76	2.9911e-05	0.00154042	25.8886	269.689	PRNP;HMOX1;SLC7A11;GCLM
Viral protein interaction with cytokine and cytokine receptor	4/100	4	0.000953077	0.0298931	9.9483	69.1985	CXCL8;CCL20;CXCL2;CCL26
NOD-like receptor signaling pathway	5/181	2.76	0.00116568	0.0298931	6.8379	46.1864	GABARAPL1;CXCL8;TXN;CXCL2;BIRC3
TNF signaling pathway	4/112	3.57	0.00145112	0.0298931	8.8376	57.7572	CCL20;CXCL2;MAP3K14;BIRC3
Legionellosis	3/57	5.26	0.00196344	0.0307075	13.1343	81.8666	CXCL8;CXCL2;NFKB2
Osteoclast differentiation	4/127	3.15	0.0022985	0.0307075	7.7539	47.1091	SQSTM1;MAP3K14;RELB;NFKB2
Steroid hormone biosynthesis	3/61	4.92	0.00238505	0.0307075	12.226	73.827	AKR1C1;AKR1C3;CYP19A1
Fluid shear stress and atherosclerosis	4/139	2.88	0.00318414	0.0363296	7.0604	40.5944	NQO1;HMOX1;TXN;SQSTM1
Epithelial cell signaling in Helicobacter pylori infection	3/70	4.29	0.00352715	0.0363296	10.5789	59.7418	CXCL8;CXCL2;MAP3K14
Salmonella infection	5/249	2.01	0.00463562	0.0434063	4.9153	26.4147	CXCL8;LY96;TXN;TUBA4A;BIRC3
Folate biosynthesis	2/26	7.69	0.00568053	0.0487579	19.499	100.824	AKR1B10;AKR1C3
Rheumatoid arthritis	3/93	3.23	0.00778396	0.0550408	7.8663	38.1962	CXCL8;CCL20;CXCL2
Galactose metabolism	2/31	6.45	0.00801399	0.0550408	16.1331	77.8673	AKR1B10;GLA
IL-17 signaling pathway	3/94	3.19	0.00801565	0.0550408	7.7794	37.5463	CXCL8;CCL20;CXCL2
Cytokine-cytokine receptor interaction	5/295	1.69	0.0093285	0.0572304	4.1259	19.2875	CXCL8;CCL20;IL13RA2;CXCL2;CCL26
Chemokine signaling pathway	4/192	2.08	0.00986643	0.0572304	5.0564	23.3536	CXCL8;CCL20;CXCL2;CCL26
Toll-like receptor signaling pathway	3/104	2.88	0.0105571	0.0572304	7.0057	31.8825	CXCL8;SPP1;LY96
C-type lectin receptor signaling pathway	3/104	2.88	0.0105571	0.0572304	7.0057	31.8825	MAP3K14;RELB;NFKB2
Ovarian steroidogenesis	2/51	3.92	0.0207762	0.106998	9.5385	36.9518	AKR1C3;CYP19A1
Apoptosis	3/142	2.11	0.0240862	0.118137	5.0807	18.9312	MAP3K14;TUBA4A;BIRC3
Glutathione metabolism	2/57	3.51	0.0255752	0.119739	8.4954	31.1453	GSR;GCLM
Pathways in cancer	6/531	1.13	0.0282486	0.124459	2.7355	9.7568	NQO1;CXCL8;TXNRD1;HMOX1;BIRC3;NFKB2
Glycerolipid metabolism	2/61	3.28	0.0290001	0.124459	7.9178	28.0328	AKR1B10;GLA
Mitophagy	2/68	2.94	0.0354038	0.145864	7.0756	23.6391	GABARAPL1;SQSTM1
Hepatocellular carcinoma	3/168	1.79	0.036952	0.146387	4.2745	14.0977	NQO1;TXNRD1;HMOX1
MAPK signaling pathway	4/294	1.36	0.0394221	0.150388	3.261	10.5442	PTPRR;MAP3K14;RELB;NFKB2
Pertussis	2/76	2.63	0.0433218	0.159362	6.3081	19.8018	CXCL8;LY96
Ubiquinone and other terpenoid-quinone biosynthesis	1/11	9.09	0.046834	0.166341	23.143	70.8442	NQO1
Kaposi sarcoma-associated herpesvirus infection	3/193	1.55	0.0520325	0.178645	3.7073	10.9585	GABARAPL1;CXCL8;CXCL2
Pathways of neurodegeneration	5/475	1.05	0.0561886	0.186691	2.5224	7.2622	PRNP;UCHL1;GABARAPL1;SQSTM1;TUBA4A
Epstein-Barr virus infection	3/202	1.49	0.0580871	0.186968	3.538	10.0686	MAP3K14;RELB;NFKB2
Lipid and atherosclerosis	3/215	1.4	0.067393	0.208525	3.3189	8.9518	CXCL8;LY96;CXCL2
Human T-cell leukemia virus 1 infection	3/219	1.37	0.0703858	0.208525	3.2568	8.6427	MAP3K14;RELB;NFKB2
Selenocompound metabolism	1/17	5.88	0.071459	0.208525	14.46	38.1547	TXNRD1
Amoebiasis	2/102	1.96	0.0728827	0.208525	4.6619	12.209	CXCL8;CXCL2
Toxoplasmosis	2/112	1.79	0.085575	0.238222	4.2359	10.4135	LY96;BIRC3
Shigellosis	3/246	1.22	0.0920977	0.249633	2.8909	6.8946	GABARAPL1;CXCL8;SQSTM1
Parkinson disease	3/249	1.2	0.0946649	0.250013	2.8553	6.731	UCHL1;TXN;TUBA4A
Lysosome	2/128	1.56	0.107121	0.275836	3.6951	8.254	GLA;AP1M2
Apelin signaling pathway	2/137	1.46	0.119815	0.293832	3.4471	7.3142	GABARAPL1;SPP1
Autophagy	2/137	1.46	0.119815	0.293832	3.4471	7.3142	GABARAPL1;SQSTM1
Fructose and mannose metabolism	1/33	3.03	0.134093	0.3212	7.2242	14.515	AKR1B10
Pentose and glucuronate interconversions	1/34	2.94	0.137866	0.322732	7.0049	13.8801	AKR1B10
Mucin type O-glycan biosynthesis	1/36	2.78	0.145363	0.330755	6.604	12.7359	GCNT3
Cellular senescence	2/156	1.28	0.147716	0.330755	3.0189	5.7736	CXCL8;SQSTM1
Necroptosis	2/159	1.26	0.152237	0.333626	2.9608	5.5732	SQSTM1;BIRC3
Hippo signaling pathway	2/163	1.23	0.158308	0.339703	2.8867	5.3207	AFP;BIRC3
Bladder cancer	1/41	2.44	0.163825	0.340111	5.777	10.4504	CXCL8
Tryptophan metabolism	1/42	2.38	0.16747	0.340111	5.6358	10.071	KYNU
Porphyrin and chlorophyll metabolism	1/43	2.33	0.171099	0.340111	5.5014	9.7128	HMOX1
Vasopressin-regulated water reabsorption	1/44	2.27	0.174713	0.340111	5.3732	9.3741	AQP3
ABC transporters	1/45	2.22	0.178311	0.340111	5.2508	9.0536	ABCC2
Glycosphingolipid biosynthesis	1/45	2.22	0.178311	0.340111	5.2508	9.0536	GLA
Intestinal immune network for IgA production	1/48	2.08	0.189012	0.348192	4.9149	8.1879	MAP3K14
Sphingolipid metabolism	1/49	2.04	0.192548	0.348192	4.8123	7.9278	GLA
Cysteine and methionine metabolism	1/50	2	0.196069	0.348192	4.7138	7.6802	GCLM
Malaria	1/50	2	0.196069	0.348192	4.7138	7.6802	CXCL8
Transcriptional misregulation in cancer	2/192	1.04	0.203481	0.35523	2.4425	3.8889	CXCL8;BIRC3
Amyotrophic lateral sclerosis	3/364	0.82	0.211116	0.356995	1.9343	3.0085	GABARAPL1;SQSTM1;TUBA4A
Pathogenic Escherichia coli infection	2/197	1.02	0.211424	0.356995	2.3792	3.6971	CXCL8;TUBA4A
Focal adhesion	2/201	1	0.217801	0.361831	2.3309	3.5528	SPP1;BIRC3
Mineral absorption	1/60	1.67	0.230455	0.376293	3.9129	5.7429	HMOX1
Arachidonic acid metabolism	1/61	1.64	0.233813	0.376293	3.8475	5.5913	AKR1C3
GnRH secretion	1/64	1.56	0.243799	0.386328	3.6637	5.171	SPP1
RIG-I-like receptor signaling pathway	1/70	1.43	0.263387	0.411043	3.3441	4.4615	CXCL8
Thyroid hormone synthesis	1/75	1.33	0.279326	0.427863	3.1174	3.9758	GSR
Metabolism of xenobiotics by cytochrome P450	1/76	1.32	0.282473	0.427863	3.0757	3.8882	AKR1C1
Complement and coagulation cascades	1/85	1.18	0.310189	0.457964	2.7449	3.2131	CLU
ECM-receptor interaction	1/88	1.14	0.319191	0.457964	2.6498	3.026	SPP1
Gap junction	1/88	1.14	0.319191	0.457964	2.6498	3.026	TUBA4A
GABAergic synapse	1/89	1.12	0.322165	0.457964	2.6196	2.9672	GABARAPL1
Bile secretion	1/90	1.11	0.325127	0.457964	2.59	2.91	ABCC2
Small cell lung cancer	1/92	1.09	0.331012	0.457964	2.5328	2.8003	BIRC3
Prion disease	2/273	0.73	0.333469	0.457964	1.7054	1.8729	PRNP;TUBA4A
AGE-RAGE signaling pathway in diabetic complications	1/100	1	0.35405	0.479831	2.3272	2.4164	CXCL8
Chagas disease	1/102	0.98	0.359686	0.481138	2.2809	2.3323	CXCL8
T cell receptor signaling pathway	1/104	0.96	0.365273	0.482347	2.2364	2.2523	MAP3K14
Parathyroid hormone synthesis, secretion and action	1/106	0.94	0.370812	0.483463	2.1936	2.1762	PTHLH
HIF-1 signaling pathway	1/109	0.92	0.379031	0.488002	2.1323	2.0686	HMOX1
FoxO signaling pathway	1/131	0.76	0.436146	0.554606	1.7695	1.4683	GABARAPL1
Yersinia infection	1/137	0.73	0.4508	0.566249	1.6909	1.3472	CXCL8
Ubiquitin mediated proteolysis	1/140	0.71	0.457986	0.568344	1.6542	1.2918	BIRC3
Breast cancer	1/147	0.68	0.474392	0.570926	1.5743	1.174	NFKB2
Cell adhesion molecules	1/148	0.68	0.476695	0.570926	1.5635	1.1584	NRCAM
Phospholipase D signaling pathway	1/148	0.68	0.476695	0.570926	1.5635	1.1584	CXCL8
Phagosome	1/152	0.66	0.485809	0.575153	1.5218	1.0986	TUBA4A
Non-alcoholic fatty liver disease	1/155	0.65	0.492541	0.576497	1.4919	1.0565	CXCL8
Hepatitis B	1/162	0.62	0.507913	0.581278	1.4265	0.9664	CXCL8
JAK-STAT signaling pathway	1/162	0.62	0.507913	0.581278	1.4265	0.9664	IL13RA2
Tight junction	1/169	0.59	0.522824	0.591768	1.3666	0.8863	TUBA4A
Influenza A	1/172	0.58	0.529077	0.592337	1.3424	0.8546	CXCL8
Viral carcinogenesis	1/203	0.49	0.589132	0.645538	1.1346	0.6003	NFKB2
Diabetic cardiomyopathy	1/203	0.49	0.589132	0.645538	1.1346	0.6003	GSR
Human immunodeficiency virus 1 infection	1/212	0.47	0.605103	0.656059	1.0857	0.5454	AP1M2
Human cytomegalovirus infection	1/225	0.44	0.627094	0.67282	1.0221	0.477	CXCL8
Coronavirus disease	1/232	0.43	0.63843	0.67792	0.9907	0.4446	CXCL8
Huntington disease	1/306	0.33	0.739278	0.773909	0.7475	0.2258	TUBA4A
MicroRNAs in cancer	1/310	0.32	0.743855	0.773909	0.7377	0.2183	HMOX1
Human papillomavirus infection	1/331	0.3	0.766611	0.78961	0.69	0.1834	SPP1
PI3K-Akt signaling pathway	1/354	0.28	0.789247	0.804875	0.6443	0.1525	SPP1
Alzheimer disease	1/369	0.27	0.802825	0.810696	0.6176	0.1356	TUBA4A
Herpes simplex virus 1 infection	1/498	0.2	0.889031	0.889031	0.4543	0.0534	BIRC3

## Sheet: MSigDB_Hallmark_UP
MSigDB Hallmark 2020 | Common Upregulated DEGs (MM27 Aur & MM13 Aur) | Sorted by Adjusted P-value | Bold = shown in figure
Top 20 sig. → orange | Other sig. → yellow | Bold = in figure (5) | Significant (adj.p<0.05): 11/34
Term	Overlap	Overlap (%)	P-value	Adjusted P-value	Odds Ratio	Combined Score	Genes
Reactive Oxygen Species Pathway	8/49	16.33	3.59692e-11	1.22295e-09	49.0818	1180.34	NQO1;PRNP;SRXN1;TXNRD1;GSR;GLRX;TXN;GCLM
mTORC1 Signaling	10/200	5	1.63632e-08	2.78175e-07	13.4812	241.694	MLLT11;SLC6A6;TXNRD1;IFRD1;GSR;GLRX;SLC7A11;SQSTM1;GLA;TUBA4A
TNF-alpha Signaling via NF-kB	8/200	4	2.58396e-06	2.19636e-05	10.4014	133.826	CCL20;KYNU;DNAJB4;CXCL2;SQSTM1;BIRC3;RELB;NFKB2
Xenobiotic Metabolism	8/200	4	2.58396e-06	2.19636e-05	10.4014	133.826	NQO1;SLC6A6;GABARAPL1;ABCC2;KYNU;GSR;AKR1C3;HMOX1
KRAS Signaling Up	7/200	3.5	2.67552e-05	0.000181935	8.9404	94.1317	PTPRR;CCL20;SPP1;LY96;ANXA10;GLRX;BIRC3
UV Response Up	5/158	3.16	0.000633519	0.00335034	7.875	57.9934	HMOX1;AQP3;CXCL2;SQSTM1;TUBA4A
Apoptosis	5/161	3.11	0.000689776	0.00335034	7.7224	56.2125	GSR;HMOX1;CLU;SQSTM1;BIRC3
Myogenesis	5/200	2.5	0.00181025	0.00769356	6.1657	38.9322	PRNP;NQO1;HSPB8;IFRD1;CLU
Complement	4/200	2	0.0113321	0.0350266	4.848	21.7198	KYNU;TFPI2;CLU;PHEX
Epithelial Mesenchymal Transition	4/200	2	0.0113321	0.0350266	4.848	21.7198	CXCL8;TFPI2;SPP1;PTHLH
heme Metabolism	4/200	2	0.0113321	0.0350266	4.848	21.7198	SLC7A11;CLIC2;GCLM;AQP3
IL-2/STAT5 Signaling	3/199	1.51	0.0560331	0.128551	3.5927	10.3536	PRNP;GABARAPL1;SPP1
Hypoxia	3/200	1.5	0.0567138	0.128551	3.5743	10.2574	SLC6A6;HMOX1;GLRX
Estrogen Response Early	3/200	1.5	0.0567138	0.128551	3.5743	10.2574	HSPB8;AQP3;GLA
Estrogen Response Late	3/200	1.5	0.0567138	0.128551	3.5743	10.2574	HSPB8;TFPI2;GLA
Coagulation	2/138	1.45	0.121248	0.257652	3.4216	7.2194	TFPI2;CLU
Hedgehog Signaling	1/36	2.78	0.145363	0.274575	6.604	12.7359	NRCAM
Angiogenesis	1/36	2.78	0.145363	0.274575	6.604	12.7359	SPP1
Inflammatory Response	2/200	1	0.216205	0.350047	2.3428	3.5881	CXCL8;CCL20
Glycolysis	2/200	1	0.216205	0.350047	2.3428	3.5881	GLRX;TXN
p53 Pathway	2/200	1	0.216205	0.350047	2.3428	3.5881	HMOX1;SLC7A11
Cholesterol Homeostasis	1/74	1.35	0.276166	0.426802	3.1602	4.0665	CLU
IL-6/JAK/STAT3 Signaling	1/87	1.15	0.316203	0.467431	2.6808	3.0866	HMOX1
Protein Secretion	1/96	1.04	0.342631	0.481294	2.4257	2.5982	GLA
Androgen Response	1/100	1	0.35405	0.481294	2.3272	2.4164	GSR
PI3K/AKT/mTOR Signaling	1/105	0.95	0.368048	0.481294	2.2148	2.2138	SQSTM1
Bile Acid Metabolism	1/112	0.89	0.387144	0.487514	2.0744	1.9685	GCLM
Spermatogenesis	1/135	0.74	0.445958	0.54152	1.7163	1.386	IL13RA2
Fatty Acid Metabolism	1/158	0.63	0.499187	0.583668	1.4632	1.0166	GABARAPL1
Mitotic Spindle	1/199	0.5	0.581831	0.583668	1.1578	0.627	TUBA4A
Adipogenesis	1/200	0.5	0.583668	0.583668	1.1519	0.6202	HSPB8
Apical Junction	1/200	0.5	0.583668	0.583668	1.1519	0.6202	AMIGO2
Myc Targets V1	1/200	0.5	0.583668	0.583668	1.1519	0.6202	IFRD1
KRAS Signaling Dn	1/200	0.5	0.583668	0.583668	1.1519	0.6202	AKR1B10

## Sheet: NCI_Nature_DN
NCI-Nature 2016 | Common Downregulated DEGs (MM27 Aur & MM13 Aur) | Sorted by Adjusted P-value | Bold = shown in figure
Top 20 sig. → blue | Other sig. → grey | Bold = in figure (2) | Significant (adj.p<0.05): 6/23
Term	Overlap	Overlap (%)	P-value	Adjusted P-value	Odds Ratio	Combined Score	Genes
Aurora B signaling Homo sapiens 304a75af-618c-11e5-8ac5-06603eb7f303	3/39	7.69	6.94202e-05	0.000861835	43.6908	418.354	CDCA8;KIF20A;CENPA
FOXM1 transcription factor network Homo sapiens c51cda49-6192-11e5-8ac5-06603eb7f303	3/40	7.5	7.49422e-05	0.000861835	42.5078	403.773	CENPF;PLK1;CENPA
PLK1 signaling events Homo sapiens e5e87977-6194-11e5-8ac5-06603eb7f303	3/46	6.52	0.000114165	0.000875269	36.5655	331.936	TPX2;PLK1;KIF20A
Aurora A signaling Homo sapiens f131cf8e-618b-11e5-8ac5-06603eb7f303	2/31	6.45	0.00183609	0.0105575	35.2431	222.036	TPX2;CENPA
Hedgehog signaling events mediated by Gli proteins Homo sapiens 153b6970-6193-11e5-8ac5-06603eb7f303	2/47	4.26	0.0041809	0.0192322	22.694	124.3	GLI3;MTSS1
C-MYB transcription factor network Homo sapiens 61020228-618e-11e5-8ac5-06603eb7f303	2/82	2.44	0.0122771	0.0470623	12.7429	56.0692	MYB;KIT
LPA4-mediated signaling events Homo sapiens 53b0602f-6194-11e5-8ac5-06603eb7f303	1/15	6.67	0.0303229	0.0996324	35.6161	124.508	ADCY1
IL2 signaling events mediated by PI3K Homo sapiens 8bbf39aa-6193-11e5-8ac5-06603eb7f303	1/35	2.86	0.0693617	0.150975	14.6507	39.0943	MYB
E-cadherin signaling in the nascent adherens junction Homo sapiens aef0d8c2-6191-11e5-8ac5-06603eb7f303	1/39	2.56	0.0769833	0.150975	13.1059	33.6058	CYFIP2
ATR signaling pathway Homo sapiens 8991cbac-618b-11e5-8ac5-06603eb7f303	1/39	2.56	0.0769833	0.150975	13.1059	33.6058	PLK1
Stabilization and expansion of the E-cadherin adherens junction Homo sapiens f1a6cd94-6195-11e5-8ac5-06603eb7f303	1/41	2.44	0.0807713	0.150975	12.4494	31.3243	CYFIP2
FoxO family signaling Homo sapiens d06dbbda-6192-11e5-8ac5-06603eb7f303	1/48	2.08	0.09391	0.150975	10.5915	25.0533	PLK1
Notch-mediated HES/HEY network Homo sapiens 8ee56389-6194-11e5-8ac5-06603eb7f303	1/48	2.08	0.09391	0.150975	10.5915	25.0533	MYB
Signaling events mediated by Stem cell factor receptor (c-Kit) Homo sapiens c6b6861c-6195-11e5-8ac5-06603eb7f303	1/52	1.92	0.101335	0.150975	9.7588	22.3411	KIT
Validated transcriptional targets of TAp63 isoforms Homo sapiens 82e8ee19-6196-11e5-8ac5-06603eb7f303	1/53	1.89	0.103183	0.150975	9.5707	21.7374	PLK1
RAC1 signaling pathway Homo sapiens faffa4fc-6194-11e5-8ac5-06603eb7f303	1/54	1.85	0.105026	0.150975	9.3896	21.16	CYFIP2
IL4-mediated signaling events Homo sapiens cff33f50-6193-11e5-8ac5-06603eb7f303	1/60	1.67	0.116009	0.151389	8.4322	18.1637	MYB
Endothelins Homo sapiens dfb9dc47-6191-11e5-8ac5-06603eb7f303	1/63	1.59	0.121451	0.151389	8.023	16.9144	ADCY1
LPA receptor mediated events Homo sapiens 4b994cde-6194-11e5-8ac5-06603eb7f303	1/65	1.54	0.12506	0.151389	7.7715	16.1566	ADCY1
AP-1 transcription factor network Homo sapiens 3ce2f9c5-6189-11e5-8ac5-06603eb7f303	1/69	1.45	0.132237	0.152072	7.3129	14.7951	MYB
p73 transcription factor network Homo sapiens a88c505e-6194-11e5-8ac5-06603eb7f303	1/78	1.28	0.148174	0.162286	6.4552	12.3253	PLK1
ErbB1 downstream signaling Homo sapiens 30d60550-6192-11e5-8ac5-06603eb7f303	1/105	0.95	0.194291	0.203123	4.7728	7.8198	CYFIP2
PDGFR-beta signaling pathway Homo sapiens c901a3e4-6194-11e5-8ac5-06603eb7f303	1/128	0.78	0.231648	0.231648	3.9039	5.7097	CYFIP2

## Sheet: KEA_DN
KEA 2015 | Common Downregulated DEGs (MM27 Aur & MM13 Aur) | Sorted by Adjusted P-value | Bold = shown in figure
Top 20 sig. → blue | Other sig. → grey | Bold = in figure (2) | Significant (adj.p<0.05): 4/38
Term	Overlap	Overlap (%)	P-value	Adjusted P-value	Odds Ratio	Combined Score	Genes
AURKB	3/77	3.9	0.000526434	0.0200045	21.2144	160.156	CDCA8;MKI67;CENPA
AURKA	2/36	5.56	0.00247154	0.0410805	30.0528	180.404	PLK1;CENPA
CDK1	5/494	1.01	0.0032432	0.0410805	5.53	31.6935	TPX2;PTTG2;MYB;MKI67;CENPA
MAPK1	4/326	1.23	0.00436463	0.041464	6.5929	35.8274	TPX2;MYB;BMF;GTSE1
MATK	1/5	20	0.010209	0.0581331	124.719	571.772	KIT
PLK1	2/77	2.6	0.0108868	0.0581331	13.5959	61.4563	PLK1;GTSE1
KIT	1/6	16.67	0.0122385	0.0581331	99.77	439.304	KIT
STK10	1/6	16.67	0.0122385	0.0581331	99.77	439.304	PLK1
TTK	1/8	12.5	0.0162855	0.068761	71.2571	293.4	CDCA8
PRKG1	2/106	1.89	0.0199477	0.0758012	9.7904	38.326	PLK1;KIT
GSK3B	4/527	0.76	0.0223634	0.0772553	4.0176	15.2681	TPX2;MYB;MKI67;GTSE1
CDK2	4/553	0.72	0.0261191	0.0827104	3.8222	13.9322	TPX2;CENPF;MYB;MKI67
CSNK1E	2/128	1.56	0.0283247	0.0827953	8.072	28.7689	MYB;GTSE1
MAP3K8	1/19	5.26	0.0382563	0.103839	27.6958	90.3839	PLK1
MAPK14	3/396	0.76	0.0472084	0.1142	3.9305	12.0005	TPX2;MYB;MKI67
ROCK2	1/24	4.17	0.0480841	0.1142	21.6696	65.7629	SORL1
MAPK4	1/34	2.94	0.0674467	0.150763	15.0955	40.7037	MYB
PRKCE	1/46	2.17	0.0901749	0.170327	11.0633	26.6184	NREP
MAPKAPK2	1/47	2.13	0.0920444	0.170327	10.8223	25.8164	PLK1
PAK1	1/48	2.08	0.09391	0.170327	10.5915	25.0533	PLK1
PRKCZ	1/50	2	0.0976302	0.170327	10.1582	23.6337	NREP
SRC	2/259	0.77	0.0986106	0.170327	3.9314	9.1073	KIT;MTSS1
CSNK1D	1/72	1.39	0.137581	0.227308	7.0028	13.8904	MTSS1
LYN	1/82	1.22	0.155165	0.245678	6.1352	11.4315	KIT
IGF1R	1/86	1.16	0.1621	0.246393	5.8453	10.6357	KIT
LCK	1/96	1.04	0.179196	0.261902	5.2274	8.9873	KIT
PRKACB	1/111	0.9	0.204204	0.27615	4.5111	7.1666	KIT
INSR	1/113	0.88	0.207482	0.27615	4.4301	6.9673	KIT
FYN	1/115	0.87	0.210746	0.27615	4.352	6.7765	KIT
PRKCA	2/442	0.45	0.229302	0.29045	2.2749	3.3503	TPX2;KIT
CHEK1	1/137	0.73	0.245801	0.301304	3.6439	5.1133	MKI67
MAPK3	1/202	0.5	0.340731	0.404618	2.4575	2.6459	MYB
MAPK8	1/225	0.44	0.371444	0.420952	2.2026	2.1813	BMF
CSNK2A2	1/229	0.44	0.376641	0.420952	2.1635	2.1126	MYB
PRKCB	1/250	0.4	0.403245	0.437809	1.9789	1.7973	KIT
CSNK2A1	1/286	0.35	0.446297	0.471091	1.7258	1.3923	MYB
RPS6KA3	1/332	0.3	0.496919	0.510349	1.4825	1.0367	TPX2
PRKACA	1/393	0.25	0.557136	0.557136	1.2479	0.73	GLI3

## Sheet: GO_BioProcess_DN
GO Biological Process 2025 | Common Downregulated DEGs (MM27 Aur & MM13 Aur) | Sorted by Adjusted P-value | Bold = shown in figure
Top 20 sig. → blue | Other sig. → grey | Bold = in figure (1) | Significant (adj.p<0.05): 20/469
Term	Overlap	Overlap (%)	P-value	Adjusted P-value	Odds Ratio	Combined Score	Genes
Mitotic Cytokinesis (GO:0000281)	4/62	6.45	7.77846e-06	0.0036481	37.0941	436.381	PLK1;CDCA8;KIF20A;CENPA
Cytoskeleton-Dependent Cytokinesis (GO:0061640)	4/84	4.76	2.60434e-05	0.00539899	26.8635	283.565	PLK1;CDCA8;KIF20A;CENPA
Establishment of Mitotic Spindle Orientation (GO:0000132)	3/31	9.68	3.45351e-05	0.00539899	56.1964	577.336	SAPCD2;PLK1;CENPA
Establishment of Mitotic Spindle Localization (GO:0040001)	3/36	8.33	5.44677e-05	0.00573135	47.6699	468.018	SAPCD2;PLK1;CENPA
Establishment of Spindle Orientation (GO:0051294)	3/40	7.5	7.49422e-05	0.00573135	42.5078	403.773	SAPCD2;PLK1;CENPA
Regulation of Mitotic Spindle Organization (GO:0060236)	3/41	7.32	8.07438e-05	0.00573135	41.3871	390.042	TPX2;PSRC1;PLK1
Regulation of Protein Localization to Cell Cortex (GO:1904776)	2/7	28.57	8.55426e-05	0.00573135	204.656	1916.91	SAPCD2;PLK1
Mitotic Sister Chromatid Segregation (GO:0000070)	4/120	3.33	0.000105131	0.0061633	18.493	169.402	TPX2;PSRC1;PLK1;CDCA8
Microtubule Bundle Formation (GO:0001578)	3/53	5.66	0.000174437	0.00909009	31.4353	272.039	PSRC1;PLK1;KIF20A
Metaphase Chromosome Alignment (GO:0051310)	3/55	5.45	0.000194799	0.00913606	30.2232	258.213	CENPF;PSRC1;CDCA8
Regulation of Cytokinesis (GO:0032465)	3/81	3.7	0.00061054	0.0260312	20.1225	148.93	PLK1;KIF20A;E2F8
Regulation of Smooth Muscle Cell Migration (GO:0014910)	2/19	10.53	0.000685796	0.0268032	60.1569	438.238	IGFBP5;SORL1
Regulation of Spindle Organization (GO:0090224)	2/20	10	0.000761008	0.0274548	56.812	407.959	TPX2;PSRC1
Mitotic Spindle Organization (GO:0007052)	3/90	3.33	0.000830002	0.0278051	18.0327	127.925	TPX2;PLK1;CDCA8
Myeloid Cell Development (GO:0061515)	2/26	7.69	0.00129163	0.0362994	42.5962	283.343	MYB;KIT
Mitotic Spindle Assembly Checkpoint Signaling (GO:0007094)	2/27	7.41	0.00139316	0.0362994	40.8903	268.902	CENPF;PLK1
Mitotic Spindle Checkpoint Signaling (GO:0071174)	2/27	7.41	0.00139316	0.0362994	40.8903	268.902	CENPF;PLK1
Spindle Assembly Checkpoint Signaling (GO:0071173)	2/27	7.41	0.00139316	0.0362994	40.8903	268.902	CENPF;PLK1
Negative Regulation of Mitotic Metaphase/Anaphase Transition (GO:0045841)	2/29	6.9	0.00160728	0.0396745	37.8575	243.546	CENPF;PLK1
Protein Localization to Chromatin (GO:0071168)	2/33	6.06	0.00207945	0.0487632	32.9661	203.587	PLK1;CENPA
Regulation of Cell Cycle Process (GO:0010564)	3/146	2.05	0.00331585	0.0714508	10.94	62.457	PLK1;KIF20A;MKI67
Digestive Tract Development (GO:0048565)	2/42	4.76	0.00335164	0.0714508	25.5372	145.519	KIT;GLI3
T Cell Differentiation (GO:0030217)	2/46	4.35	0.00400817	0.0817018	23.211	128.111	KIT;GLI3
Mitotic Spindle Assembly (GO:0090307)	2/47	4.26	0.0041809	0.0817018	22.694	124.3	TPX2;CDCA8
Erythrocyte Differentiation (GO:0030218)	2/48	4.17	0.00435704	0.0817381	22.1996	120.676	MYB;KIT
Protein Localization to Chromosome (GO:0034502)	2/49	4.08	0.00453658	0.0818329	21.7261	117.225	PLK1;CENPA
Positive Regulation of Proteolysis (GO:0045862)	2/52	3.85	0.00509542	0.0885094	20.4195	107.803	CYFIP2;PLK1
Regulation of Proteolysis (GO:0030162)	2/53	3.77	0.0052884	0.0885807	20.0181	104.94	CYFIP2;PLK1
Mitotic Metaphase Chromosome Alignment (GO:0007080)	2/56	3.57	0.00588725	0.0933014	18.9031	97.067	PSRC1;CDCA8
Myeloid Cell Differentiation (GO:0030099)	2/57	3.51	0.00609345	0.0933014	18.5585	94.6584	MYB;KIT
Positive Regulation of Protein Metabolic Process (GO:0051247)	3/202	1.49	0.00816119	0.0933014	7.8392	37.6937	CYFIP2;PLK1;SORL1
Spindle Assembly (GO:0051225)	2/73	2.74	0.00982853	0.0933014	14.3648	66.4006	TPX2;CDCA8
Embryonic Organ Development (GO:0048568)	2/73	2.74	0.00982853	0.0933014	14.3648	66.4006	KIT;GLI3
Negative Regulation of Cytokinesis (GO:0032466)	1/5	20	0.010209	0.0933014	124.719	571.772	E2F8
Epithelial Cell Differentiation Involved in Kidney Development (GO:0035850)	1/5	20	0.010209	0.0933014	124.719	571.772	MTSS1
Erythropoietin-Mediated Signaling Pathway (GO:0038162)	1/5	20	0.010209	0.0933014	124.719	571.772	KIT
Negative Regulation of Insulin-Like Growth Factor Receptor Signaling Pathway (GO:0043569)	1/5	20	0.010209	0.0933014	124.719	571.772	IGFBP5
Nephron Tubule Development (GO:0072080)	1/5	20	0.010209	0.0933014	124.719	571.772	MTSS1
Positive Regulation of Vascular Associated Smooth Muscle Cell Differentiation (GO:1905065)	1/5	20	0.010209	0.0933014	124.719	571.772	KIT
Metaphase/Anaphase Transition of Mitotic Cell Cycle (GO:0007091)	1/5	20	0.010209	0.0933014	124.719	571.772	PLK1
Diet Induced Thermogenesis (GO:0002024)	1/5	20	0.010209	0.0933014	124.719	571.772	SORL1
Regulation of Neuron Differentiation (GO:0045664)	2/76	2.63	0.0106177	0.0933014	13.7803	62.6348	NREP;GDPD5
Adherens Junction Maintenance (GO:0034334)	1/6	16.67	0.0122385	0.0933014	99.77	439.304	MTSS1
Metaphase/Anaphase Transition of Cell Cycle (GO:0044784)	1/6	16.67	0.0122385	0.0933014	99.77	439.304	PLK1
Regulation of Vascular Associated Smooth Muscle Cell Differentiation (GO:1905063)	1/6	16.67	0.0122385	0.0933014	99.77	439.304	KIT
Positive Regulation of Cyclin-Dependent Protein Serine/Threonine Kinase Activity (GO:0045737)	1/6	16.67	0.0122385	0.0933014	99.77	439.304	PSRC1
Regulation of Cell Division (GO:0051302)	2/85	2.35	0.0131467	0.0933014	12.2805	53.194	PLK1;KIF20A
Regulation of Mitotic Cell Cycle Phase Transition (GO:1901990)	2/88	2.27	0.0140425	0.0933014	11.8503	50.5495	CENPF;PLK1
Negative Regulation of Hematopoietic Progenitor Cell Differentiation (GO:1901533)	1/7	14.29	0.014264	0.0933014	83.1375	353.336	MYB
Regulation of Mitotic Cytokinesis (GO:1902412)	1/7	14.29	0.014264	0.0933014	83.1375	353.336	CDCA8
Positive Regulation of Smooth Muscle Cell Differentiation (GO:0051152)	1/7	14.29	0.014264	0.0933014	83.1375	353.336	KIT
Nose Development (GO:0043584)	1/7	14.29	0.014264	0.0933014	83.1375	353.336	GLI3
Regulation of Striated Muscle Tissue Development (GO:0016202)	1/7	14.29	0.014264	0.0933014	83.1375	353.336	CENPF
Cellular Response to Erythropoietin (GO:0036018)	1/7	14.29	0.014264	0.0933014	83.1375	353.336	KIT
Mitotic Nuclear Membrane Disassembly (GO:0007077)	1/7	14.29	0.014264	0.0933014	83.1375	353.336	PLK1
Positive Regulation of Adipose Tissue Development (GO:1904179)	1/7	14.29	0.014264	0.0933014	83.1375	353.336	SORL1
Positive Regulation of Attachment of Mitotic Spindle Microtubules to Kinetochore (GO:1902425)	1/7	14.29	0.014264	0.0933014	83.1375	353.336	CDCA8
Positive Regulation of Cyclin-Dependent Protein Kinase Activity (GO:1904031)	1/7	14.29	0.014264	0.0933014	83.1375	353.336	PSRC1
Double-Strand Break Repair via Alternative Nonhomologous End Joining (GO:0097681)	1/7	14.29	0.014264	0.0933014	83.1375	353.336	PLK1
Positive Regulation of Dendritic Cell Cytokine Production (GO:0002732)	1/7	14.29	0.014264	0.0933014	83.1375	353.336	KIT
Positive Regulation of Endocytic Recycling (GO:2001137)	1/7	14.29	0.014264	0.0933014	83.1375	353.336	SORL1
Positive Regulation of Cellular Component Biogenesis (GO:0044089)	2/93	2.15	0.0155927	0.0933014	11.1964	46.5877	BMF;MTSS1
Negative Regulation of DNA-templated Transcription (GO:0045892)	6/1006	0.6	0.0159018	0.0933014	3.2501	13.4598	FOXD3;CENPF;MYB;PLK1;GLI3;E2F8
T Cell Apoptotic Process (GO:0070231)	1/8	12.5	0.0162855	0.0933014	71.2571	293.4	GLI3
Anoikis (GO:0043276)	1/8	12.5	0.0162855	0.0933014	71.2571	293.4	BMF
Positive Regulation of Ubiquitin Protein Ligase Activity (GO:1904668)	1/8	12.5	0.0162855	0.0933014	71.2571	293.4	PLK1
Positive Regulation of Vascular Associated Smooth Muscle Cell Migration (GO:1904754)	1/8	12.5	0.0162855	0.0933014	71.2571	293.4	IGFBP5
Sensory Organ Morphogenesis (GO:0090596)	1/8	12.5	0.0162855	0.0933014	71.2571	293.4	GLI3
Negative Regulation of Alpha-Beta T Cell Differentiation (GO:0046639)	1/8	12.5	0.0162855	0.0933014	71.2571	293.4	GLI3
Negative Regulation of Transcription by RNA Polymerase II (GO:0000122)	5/732	0.68	0.0163376	0.0933014	3.6742	15.1165	FOXD3;MYB;PLK1;GLI3;E2F8
Positive Regulation of Supramolecular Fiber Organization (GO:1902905)	2/98	2.04	0.017213	0.0933014	10.6106	43.1011	PSRC1;MTSS1
Hemopoiesis (GO:0030097)	2/101	1.98	0.0182183	0.0933014	10.2875	41.2048	MYB;KIT
Positive Regulation of Protein Exit From Endoplasmic Reticulum (GO:0070863)	1/9	11.11	0.0183029	0.0933014	62.3469	249.431	SORL1
Positive Regulation of Protein Localization to Early Endosome (GO:1902966)	1/9	11.11	0.0183029	0.0933014	62.3469	249.431	SORL1
Positive Regulation of Protein Localization to Endosome (GO:1905668)	1/9	11.11	0.0183029	0.0933014	62.3469	249.431	SORL1
Negative Regulation of Triglyceride Metabolic Process (GO:0090209)	1/9	11.11	0.0183029	0.0933014	62.3469	249.431	SORL1
Neuron Projection Regeneration (GO:0031102)	1/9	11.11	0.0183029	0.0933014	62.3469	249.431	NREP
Axon Regeneration (GO:0031103)	1/9	11.11	0.0183029	0.0933014	62.3469	249.431	NREP
Regulation of Protein Exit From Endoplasmic Reticulum (GO:0070861)	1/9	11.11	0.0183029	0.0933014	62.3469	249.431	SORL1
Regulation of Protein Localization to Early Endosome (GO:1902965)	1/9	11.11	0.0183029	0.0933014	62.3469	249.431	SORL1
Regulation of ER to Golgi Vesicle-Mediated Transport (GO:0060628)	1/9	11.11	0.0183029	0.0933014	62.3469	249.431	SORL1
Regulation of Attachment of Mitotic Spindle Microtubules to Kinetochore (GO:1902423)	1/9	11.11	0.0183029	0.0933014	62.3469	249.431	CDCA8
Negative Regulation of Inclusion Body Assembly (GO:0090084)	1/10	10	0.0203163	0.0933014	55.4167	215.922	SORL1
Positive Regulation of Mitotic Cell Cycle Spindle Assembly Checkpoint (GO:0090267)	1/10	10	0.0203163	0.0933014	55.4167	215.922	CDCA8
Aspartate Family Amino Acid Metabolic Process (GO:0009066)	1/10	10	0.0203163	0.0933014	55.4167	215.922	NAT8L
Kinetochore Assembly (GO:0051382)	1/10	10	0.0203163	0.0933014	55.4167	215.922	CENPF
Nuclear Membrane Disassembly (GO:0051081)	1/10	10	0.0203163	0.0933014	55.4167	215.922	PLK1
Protein Localization to Nuclear Envelope (GO:0090435)	1/10	10	0.0203163	0.0933014	55.4167	215.922	PLK1
Mast Cell Activation Involved in Immune Response (GO:0002279)	1/10	10	0.0203163	0.0933014	55.4167	215.922	KIT
Mast Cell Degranulation (GO:0043303)	1/10	10	0.0203163	0.0933014	55.4167	215.922	KIT
Megakaryocyte Development (GO:0035855)	1/10	10	0.0203163	0.0933014	55.4167	215.922	KIT
Melanocyte Differentiation (GO:0030318)	1/10	10	0.0203163	0.0933014	55.4167	215.922	KIT
Regulation of Triglyceride Catabolic Process (GO:0010896)	1/10	10	0.0203163	0.0933014	55.4167	215.922	SORL1
Mitotic Spindle Elongation (GO:0000022)	1/10	10	0.0203163	0.0933014	55.4167	215.922	CDCA8
Mitotic Spindle Midzone Assembly (GO:0051256)	1/10	10	0.0203163	0.0933014	55.4167	215.922	CDCA8
Positive Regulation of Attachment of Spindle Microtubules to Kinetochore (GO:0051987)	1/10	10	0.0203163	0.0933014	55.4167	215.922	CDCA8
Regulation of Animal Organ Morphogenesis (GO:2000027)	1/10	10	0.0203163	0.0933014	55.4167	215.922	SAPCD2
Detection of Mechanical Stimulus Involved in Sensory Perception of Sound (GO:0050910)	1/10	10	0.0203163	0.0933014	55.4167	215.922	KIT
Negative Regulation of Cell Division (GO:0051782)	1/10	10	0.0203163	0.0933014	55.4167	215.922	E2F8
Negative Regulation of Centrosome Duplication (GO:0010826)	1/10	10	0.0203163	0.0933014	55.4167	215.922	CCNF
Negative Regulation of Glycolytic Process (GO:0045820)	1/11	9.09	0.0223256	0.0933014	49.8725	189.616	TRIM63
Golgi Inheritance (GO:0048313)	1/11	9.09	0.0223256	0.0933014	49.8725	189.616	PLK1
Positive Regulation of Mitotic Cytokinesis (GO:1903490)	1/11	9.09	0.0223256	0.0933014	49.8725	189.616	CDCA8
Negative Regulation of Purine Nucleotide Catabolic Process (GO:0033122)	1/11	9.09	0.0223256	0.0933014	49.8725	189.616	TRIM63
Positive Regulation of Spindle Checkpoint (GO:0090232)	1/11	9.09	0.0223256	0.0933014	49.8725	189.616	CDCA8
Kinetochore Organization (GO:0051383)	1/11	9.09	0.0223256	0.0933014	49.8725	189.616	CENPF
Mast Cell Mediated Immunity (GO:0002448)	1/11	9.09	0.0223256	0.0933014	49.8725	189.616	KIT
Positive Regulation of DNA-templated DNA Replication (GO:2000105)	1/11	9.09	0.0223256	0.0933014	49.8725	189.616	E2F8
Regulation of Adipose Tissue Development (GO:1904177)	1/11	9.09	0.0223256	0.0933014	49.8725	189.616	SORL1
Skeletal Muscle Fiber Development (GO:0048741)	1/11	9.09	0.0223256	0.0933014	49.8725	189.616	SELENON
Negative Regulation of Alpha-Beta T Cell Activation (GO:0046636)	1/11	9.09	0.0223256	0.0933014	49.8725	189.616	GLI3
Regulation of Chromatin Organization (GO:1902275)	1/11	9.09	0.0223256	0.0933014	49.8725	189.616	MKI67
Mitotic Cell Cycle Phase Transition (GO:0044772)	2/113	1.77	0.0224799	0.0933014	9.1698	34.8006	CCNF;PLK1
Epithelial Cell-Cell Adhesion (GO:0090136)	1/12	8.33	0.024331	0.0967053	45.3364	168.47	KIT
Positive Regulation of Insulin Receptor Signaling Pathway (GO:0046628)	1/12	8.33	0.024331	0.0967053	45.3364	168.47	SORL1
Regulation of Mitotic Sister Chromatid Separation (GO:0010965)	1/12	8.33	0.024331	0.0967053	45.3364	168.47	CDCA8
Proteinogenic Amino Acid Metabolic Process (GO:0170039)	1/12	8.33	0.024331	0.0967053	45.3364	168.47	NAT8L
Cellular Response to Fluid Shear Stress (GO:0071498)	1/12	8.33	0.024331	0.0967053	45.3364	168.47	MTSS1
Positive Regulation of Cell Cycle Process (GO:0090068)	2/119	1.68	0.0247506	0.0975465	8.6969	32.169	CDCA8;E2F8
Regulation of Vascular Associated Smooth Muscle Cell Migration (GO:1904752)	1/13	7.69	0.0263323	0.0984191	41.5562	151.138	IGFBP5
Positive Regulation of Alpha-Beta T Cell Differentiation (GO:0046638)	1/13	7.69	0.0263323	0.0984191	41.5562	151.138	GLI3
Negative Regulation of T Cell Differentiation (GO:0045581)	1/13	7.69	0.0263323	0.0984191	41.5562	151.138	GLI3
Positive Regulation of Cellular Response to Insulin Stimulus (GO:1900078)	1/13	7.69	0.0263323	0.0984191	41.5562	151.138	SORL1
Positive Regulation of Chromosome Separation (GO:1905820)	1/13	7.69	0.0263323	0.0984191	41.5562	151.138	CDCA8
Embryonic Hemopoiesis (GO:0035162)	1/13	7.69	0.0263323	0.0984191	41.5562	151.138	KIT
Regulation of Mitotic Cell Cycle (GO:0007346)	2/124	1.61	0.0267117	0.0984191	8.3384	30.207	PLK1;MKI67
Regulation of Protein-Containing Complex Assembly (GO:0043254)	2/126	1.59	0.0275134	0.0984191	8.2031	29.4743	BMF;SORL1
Regulation of Endocytic Recycling (GO:2001135)	1/14	7.14	0.0283296	0.0984191	38.3577	136.701	SORL1
L-amino Acid Metabolic Process (GO:0170033)	1/14	7.14	0.0283296	0.0984191	38.3577	136.701	NAT8L
T Cell Differentiation in Thymus (GO:0033077)	1/14	7.14	0.0283296	0.0984191	38.3577	136.701	GLI3
Negative Regulation of Smooth Muscle Cell Migration (GO:0014912)	1/14	7.14	0.0283296	0.0984191	38.3577	136.701	IGFBP5
Regulation of Response to Oxidative Stress (GO:1902882)	1/14	7.14	0.0283296	0.0984191	38.3577	136.701	SELENON
Cell-Cell Junction Maintenance (GO:0045217)	1/14	7.14	0.0283296	0.0984191	38.3577	136.701	MTSS1
Myotube Cell Development (GO:0014904)	1/14	7.14	0.0283296	0.0984191	38.3577	136.701	SELENON
Negative Regulation of ATP Metabolic Process (GO:1903579)	1/14	7.14	0.0283296	0.0984191	38.3577	136.701	TRIM63
Positive Regulation of Mitotic Sister Chromatid Separation (GO:1901970)	1/15	6.67	0.0303229	0.103054	35.6161	124.508	CDCA8
Centromere Complex Assembly (GO:0034508)	1/15	6.67	0.0303229	0.103054	35.6161	124.508	CENPF
Digestive System Development (GO:0055123)	1/15	6.67	0.0303229	0.103054	35.6161	124.508	KIT
+ Reg of Myeloid Leukocyte Cytokine Production Inv in Imm Resp (GO:0061081)	1/16	6.25	0.0323122	0.103749	33.24	114.09	KIT
Regulation of Ryanodine-Sensitive Calcium-Release Channel Activity (GO:0060314)	1/16	6.25	0.0323122	0.103749	33.24	114.09	SELENON
Mitotic Chromosome Condensation (GO:0007076)	1/16	6.25	0.0323122	0.103749	33.24	114.09	PLK1
Negative Regulation of Amyloid-Beta Formation (GO:1902430)	1/16	6.25	0.0323122	0.103749	33.24	114.09	SORL1
Membraneless Organelle Assembly (GO:0140694)	2/139	1.44	0.0329561	0.103749	7.4198	25.3206	CENPF;CENPA
Epithelial Cell Migration (GO:0010631)	1/17	5.88	0.0342976	0.103749	31.1609	105.096	KIT
Regulation of Hematopoietic Progenitor Cell Differentiation (GO:1901532)	1/17	5.88	0.0342976	0.103749	31.1609	105.096	MYB
Immune Response-Regulating Cell Surface Receptor Signaling Pathway (GO:0002768)	1/17	5.88	0.0342976	0.103749	31.1609	105.096	KIT
Positive Regulation of Smooth Muscle Cell Migration (GO:0014911)	1/17	5.88	0.0342976	0.103749	31.1609	105.096	IGFBP5
Regulation of Ubiquitin Protein Ligase Activity (GO:1904666)	1/17	5.88	0.0342976	0.103749	31.1609	105.096	PLK1
Regulation of Ubiquitin-Protein Transferase Activity (GO:0051438)	1/17	5.88	0.0342976	0.103749	31.1609	105.096	PLK1
Negative Regulation of Amyloid Precursor Protein Catabolic Process (GO:1902992)	1/17	5.88	0.0342976	0.103749	31.1609	105.096	SORL1
Negative Regulation of Protein Metabolic Process (GO:0051248)	2/146	1.37	0.0360479	0.103749	7.0566	23.4485	IGFBP5;SORL1
Establishment of Chromosome Localization (GO:0051303)	1/18	5.56	0.0362789	0.103749	29.3265	97.2618	CENPF
Negative Regulation of Nervous System Development (GO:0051961)	1/18	5.56	0.0362789	0.103749	29.3265	97.2618	SORL1
Positive Regulation of Ubiquitin-Protein Transferase Activity (GO:0051443)	1/18	5.56	0.0362789	0.103749	29.3265	97.2618	PLK1
Nuclear Chromosome Segregation (GO:0098813)	1/18	5.56	0.0362789	0.103749	29.3265	97.2618	CENPF
Protein Localization to Chromosome, Centromeric Region (GO:0071459)	1/18	5.56	0.0362789	0.103749	29.3265	97.2618	CENPA
Megakaryocyte Differentiation (GO:0030219)	1/18	5.56	0.0362789	0.103749	29.3265	97.2618	KIT
Receptor Recycling (GO:0001881)	1/18	5.56	0.0362789	0.103749	29.3265	97.2618	SORL1
Response to Axon Injury (GO:0048678)	1/18	5.56	0.0362789	0.103749	29.3265	97.2618	NREP
Positive Regulation of Alpha-Beta T Cell Activation (GO:0046635)	1/18	5.56	0.0362789	0.103749	29.3265	97.2618	GLI3
Regulation of Amyloid Precursor Protein Catabolic Process (GO:1902991)	1/18	5.56	0.0362789	0.103749	29.3265	97.2618	SORL1
Detection of Mechanical Stimulus Involved in Sensory Perception (GO:0050974)	1/18	5.56	0.0362789	0.103749	29.3265	97.2618	KIT
Regulation of Calcium Ion Transmembrane Transporter Activity (GO:1901019)	1/18	5.56	0.0362789	0.103749	29.3265	97.2618	SELENON
Embryonic Digit Morphogenesis (GO:0042733)	1/18	5.56	0.0362789	0.103749	29.3265	97.2618	GLI3
Negative Regulation of Lipid Catabolic Process (GO:0050995)	1/19	5.26	0.0382563	0.104925	27.6958	90.3839	SORL1
Regulation of Insulin-Like Growth Factor Receptor Signaling Pathway (GO:0043567)	1/19	5.26	0.0382563	0.104925	27.6958	90.3839	IGFBP5
Regulation of Megakaryocyte Differentiation (GO:0045652)	1/19	5.26	0.0382563	0.104925	27.6958	90.3839	MYB
Regulation of Nuclear Division (GO:0051783)	1/19	5.26	0.0382563	0.104925	27.6958	90.3839	MKI67
Limb Morphogenesis (GO:0035108)	1/19	5.26	0.0382563	0.104925	27.6958	90.3839	GLI3
Cell Projection Organization (GO:0030030)	1/19	5.26	0.0382563	0.104925	27.6958	90.3839	CYFIP2
Embryonic Digestive Tract Development (GO:0048566)	1/19	5.26	0.0382563	0.104925	27.6958	90.3839	GLI3
Regulation of Mitotic Cell Cycle Spindle Assembly Checkpoint (GO:0090266)	1/20	5	0.0402298	0.107816	26.2368	84.3028	CDCA8
Positive Regulation of Release of Cytochrome C From Mitochondria (GO:0090200)	1/20	5	0.0402298	0.107816	26.2368	84.3028	BMF
Regulation of Cell Cycle G2/M Phase Transition (GO:1902749)	1/20	5	0.0402298	0.107816	26.2368	84.3028	CENPF
Regulation of Cellular Response to Transforming Growth Factor Beta Stimulus (GO:1903844)	1/20	5	0.0402298	0.107816	26.2368	84.3028	NREP
N-glycan Processing (GO:0006491)	1/21	4.76	0.0421993	0.109953	24.9237	78.8924	ST8SIA1
Homologous Chromosome Segregation (GO:0045143)	1/21	4.76	0.0421993	0.109953	24.9237	78.8924	PTTG2
Positive Regulation of Vascular Associated Smooth Muscle Cell Proliferation (GO:1904707)	1/21	4.76	0.0421993	0.109953	24.9237	78.8924	IGFBP5
Midbody Abscission (GO:0061952)	1/21	4.76	0.0421993	0.109953	24.9237	78.8924	KIF20A
Negative Regulation of Amide Metabolic Process (GO:0034249)	1/21	4.76	0.0421993	0.109953	24.9237	78.8924	SORL1
Negative Regulation of Microtubule Depolymerization (GO:0007026)	1/22	4.55	0.0441648	0.112572	23.7357	74.0513	TPX2
Negative Regulation of Myeloid Cell Differentiation (GO:0045638)	1/22	4.55	0.0441648	0.112572	23.7357	74.0513	MYB
Regulation of Mitotic Spindle Assembly (GO:1901673)	1/22	4.55	0.0441648	0.112572	23.7357	74.0513	PLK1
Negative Regulation of Cell Development (GO:0010721)	1/22	4.55	0.0441648	0.112572	23.7357	74.0513	SORL1
T-helper Cell Differentiation (GO:0042093)	1/23	4.35	0.0461264	0.115071	22.6557	69.6972	MYB
Negative Regulation of Smoothened Signaling Pathway (GO:0045879)	1/23	4.35	0.0461264	0.115071	22.6557	69.6972	GLI3
Positive Regulation of Tyrosine Phosphorylation of STAT Protein (GO:0042531)	1/23	4.35	0.0461264	0.115071	22.6557	69.6972	KIT
Placenta Development (GO:0001890)	1/23	4.35	0.0461264	0.115071	22.6557	69.6972	E2F8
Negative Regulation of Double-Strand Break Repair via Homologous Recombination (GO:2000042)	1/24	4.17	0.0480841	0.117456	21.6696	65.7629	PLK1
Negative Regulation of Protein Localization to Cell Periphery (GO:1904376)	1/24	4.17	0.0480841	0.117456	21.6696	65.7629	SAPCD2
Protein Targeting to Lysosome (GO:0006622)	1/24	4.17	0.0480841	0.117456	21.6696	65.7629	SORL1
Mitotic Cytokinetic Process (GO:1902410)	1/24	4.17	0.0480841	0.117456	21.6696	65.7629	KIF20A
Negative Regulation of Protein Depolymerization (GO:1901880)	1/25	4	0.0500379	0.120348	20.7656	62.1925	TPX2
Lamellipodium Assembly (GO:0030032)	1/25	4	0.0500379	0.120348	20.7656	62.1925	KIT
Meiosis I (GO:0007127)	1/25	4	0.0500379	0.120348	20.7656	62.1925	PTTG2
Limb Development (GO:0060173)	1/26	3.85	0.0519878	0.123143	19.934	58.9398	GLI3
Microtubule Nucleation (GO:0007020)	1/26	3.85	0.0519878	0.123143	19.934	58.9398	TPX2
Regulation of Actin Filament Bundle Assembly (GO:0032231)	1/26	3.85	0.0519878	0.123143	19.934	58.9398	MTSS1
Negative Regulation of Neurogenesis (GO:0050768)	1/27	3.7	0.0539337	0.124605	19.1663	55.9657	SORL1
Wnt Signaling Pathway, Planar Cell Polarity Pathway (GO:0060071)	1/27	3.7	0.0539337	0.124605	19.1663	55.9657	CELSR2
in Utero Embryonic Development (GO:0001701)	1/27	3.7	0.0539337	0.124605	19.1663	55.9657	FOXD3
Regulation of Protein Localization to Cell Periphery (GO:1904375)	1/27	3.7	0.0539337	0.124605	19.1663	55.9657	PLK1
Regulation of Cation Channel Activity (GO:2001257)	1/27	3.7	0.0539337	0.124605	19.1663	55.9657	SELENON
Positive Regulation of Microtubule Polymerization or Depolymerization (GO:0031112)	1/28	3.57	0.0558758	0.125386	18.4556	53.2374	PSRC1
Hematopoietic Progenitor Cell Differentiation (GO:0002244)	1/28	3.57	0.0558758	0.125386	18.4556	53.2374	KIT
Regulation of Microtubule Depolymerization (GO:0031114)	1/28	3.57	0.0558758	0.125386	18.4556	53.2374	TPX2
Nuclear Membrane Organization (GO:0071763)	1/28	3.57	0.0558758	0.125386	18.4556	53.2374	PLK1
Regulation of Transmembrane Receptor Protein Serine/Threonine Kinase Signaling Pathway (GO:0090092)	1/28	3.57	0.0558758	0.125386	18.4556	53.2374	NREP
Regulation of Tyrosine Phosphorylation of STAT Protein (GO:0042509)	1/28	3.57	0.0558758	0.125386	18.4556	53.2374	KIT
Regulation of Long-Term Synaptic Potentiation (GO:1900271)	1/29	3.45	0.0578139	0.129118	17.7955	50.7266	ADCY1
Fc Receptor Signaling Pathway (GO:0038093)	1/30	3.33	0.0597482	0.130334	17.181	48.4096	KIT
Positive Regulation of Microtubule Polymerization (GO:0031116)	1/30	3.33	0.0597482	0.130334	17.181	48.4096	PSRC1
Glycosphingolipid Biosynthetic Process (GO:0006688)	1/30	3.33	0.0597482	0.130334	17.181	48.4096	ST8SIA1
Lamellipodium Organization (GO:0097581)	1/30	3.33	0.0597482	0.130334	17.181	48.4096	KIT
Mitotic G2 DNA Damage Checkpoint Signaling (GO:0007095)	1/30	3.33	0.0597482	0.130334	17.181	48.4096	PLK1
Regulation of Spindle Assembly (GO:0090169)	1/31	3.23	0.0616786	0.132088	16.6075	46.2655	PLK1
Chromosome Condensation (GO:0030261)	1/31	3.23	0.0616786	0.132088	16.6075	46.2655	PLK1
Negative Regulation of Carbohydrate Metabolic Process (GO:0045912)	1/31	3.23	0.0616786	0.132088	16.6075	46.2655	TRIM63
Regulation of Centrosome Duplication (GO:0010824)	1/31	3.23	0.0616786	0.132088	16.6075	46.2655	CCNF
DNA Damage Response, Signal Transduction by P53 Class Mediator (GO:0030330)	1/32	3.12	0.0636052	0.133173	16.071	44.2765	GTSE1
Regulation of Metaphase/Anaphase Transition of Cell Cycle (GO:1902099)	1/32	3.12	0.0636052	0.133173	16.071	44.2765	PLK1
Regulation of Postsynapse Organization (GO:0099175)	1/32	3.12	0.0636052	0.133173	16.071	44.2765	CYFIP2
Protein Localization to Golgi Apparatus (GO:0034067)	1/32	3.12	0.0636052	0.133173	16.071	44.2765	SORL1
Protein Targeting to Vacuole (GO:0006623)	1/32	3.12	0.0636052	0.133173	16.071	44.2765	SORL1
Epithelial Tube Morphogenesis (GO:0060562)	1/33	3.03	0.0655278	0.135985	15.568	42.4271	MTSS1
Regulation of Amyloid-Beta Formation (GO:1902003)	1/33	3.03	0.0655278	0.135985	15.568	42.4271	SORL1
Negative Regulation of Microtubule Polymerization or Depolymerization (GO:0031111)	1/34	2.94	0.0674467	0.138133	15.0955	40.7037	TPX2
Liver Development (GO:0001889)	1/34	2.94	0.0674467	0.138133	15.0955	40.7037	E2F8
Regulation of Cell Cycle Phase Transition (GO:1901987)	1/34	2.94	0.0674467	0.138133	15.0955	40.7037	PLK1
Adherens Junction Organization (GO:0034332)	1/35	2.86	0.0693617	0.138197	14.6507	39.0943	MTSS1
Protein Localization to Lysosome (GO:0061462)	1/35	2.86	0.0693617	0.138197	14.6507	39.0943	SORL1
Cellular Response to cAMP (GO:0071320)	1/35	2.86	0.0693617	0.138197	14.6507	39.0943	IGFBP5
Dendrite Morphogenesis (GO:0048813)	1/35	2.86	0.0693617	0.138197	14.6507	39.0943	CELSR2
Smoothened Signaling Pathway (GO:0007224)	1/35	2.86	0.0693617	0.138197	14.6507	39.0943	GLI3
Positive Regulation of Cytokine Production Involved in Immune Response (GO:0002720)	1/35	2.86	0.0693617	0.138197	14.6507	39.0943	KIT
Regulation of RNA Biosynthetic Process (GO:2001141)	3/465	0.65	0.0695405	0.138197	3.3317	8.8818	MYB;CELSR2;GLI3
Negative Regulation of Double-Strand Break Repair (GO:2000780)	1/36	2.78	0.0712728	0.138216	14.2314	37.5886	PLK1
Negative Regulation of Smooth Muscle Cell Proliferation (GO:0048662)	1/36	2.78	0.0712728	0.138216	14.2314	37.5886	IGFBP5
Sister Chromatid Segregation (GO:0000819)	1/36	2.78	0.0712728	0.138216	14.2314	37.5886	PLK1
Embryonic Limb Morphogenesis (GO:0030326)	1/36	2.78	0.0712728	0.138216	14.2314	37.5886	GLI3
Negative Regulation of Cell Cycle Process (GO:0010948)	1/36	2.78	0.0712728	0.138216	14.2314	37.5886	E2F8
Negative Regulation of RNA Biosynthetic Process (GO:1902679)	3/470	0.64	0.0713182	0.138216	3.2952	8.7012	CENPF;MYB;GLI3
Regulation of Release of Cytochrome C From Mitochondria (GO:0090199)	1/37	2.7	0.0731801	0.140088	13.8354	36.1773	BMF
Microtubule Polymerization (GO:0046785)	1/37	2.7	0.0731801	0.140088	13.8354	36.1773	TPX2
Regulation of G2/M Transition of Mitotic Cell Cycle (GO:0010389)	1/37	2.7	0.0731801	0.140088	13.8354	36.1773	CENPF
Regulation of Cell Migration (GO:0030334)	3/479	0.63	0.0745702	0.141993	3.2314	8.3887	IGFBP5;KIT;SORL1
Positive Regulation of Receptor Signaling Pathway via JAK-STAT (GO:0046427)	1/38	2.63	0.0750836	0.141993	13.4608	34.8521	KIT
Regulation of Vascular Associated Smooth Muscle Cell Proliferation (GO:1904705)	1/38	2.63	0.0750836	0.141993	13.4608	34.8521	IGFBP5
SCF-dependent Proteasomal Ubiquitin-Dependent Protein Catabolic Process (GO:0031146)	1/39	2.56	0.0769833	0.143845	13.1059	33.6058	CCNF
Glycosphingolipid Metabolic Process (GO:0006687)	1/39	2.56	0.0769833	0.143845	13.1059	33.6058	ST8SIA1
Positive Regulation of Transferase Activity (GO:0051347)	1/39	2.56	0.0769833	0.143845	13.1059	33.6058	PLK1
G2/M Transition of Mitotic Cell Cycle (GO:0000086)	1/40	2.5	0.0788792	0.146223	12.7692	32.4318	PLK1
Positive Regulation of Cytokinesis (GO:0032467)	1/40	2.5	0.0788792	0.146223	12.7692	32.4318	CDCA8
Regulation of Hippo Signaling (GO:0035330)	1/41	2.44	0.0807713	0.147404	12.4494	31.3243	MOB3B
Apoptotic Process (GO:0006915)	2/232	0.86	0.0818208	0.147404	4.3989	11.0114	CYFIP2;BMF
Regulation of Glycolytic Process (GO:0006110)	1/42	2.38	0.0826595	0.147404	12.1451	30.2781	TRIM63
Positive Regulation of Neuron Differentiation (GO:0045666)	1/42	2.38	0.0826595	0.147404	12.1451	30.2781	GDPD5
Positive Regulation of Receptor Signaling Pathway via STAT (GO:1904894)	1/42	2.38	0.0826595	0.147404	12.1451	30.2781	KIT
Protein Destabilization (GO:0031648)	1/42	2.38	0.0826595	0.147404	12.1451	30.2781	PLK1
Lysosome Localization (GO:0032418)	1/42	2.38	0.0826595	0.147404	12.1451	30.2781	KIT
Response to cAMP (GO:0051591)	1/42	2.38	0.0826595	0.147404	12.1451	30.2781	IGFBP5
Negative Regulation of DNA Recombination (GO:0045910)	1/42	2.38	0.0826595	0.147404	12.1451	30.2781	PLK1
Skeletal Muscle Tissue Development (GO:0007519)	1/42	2.38	0.0826595	0.147404	12.1451	30.2781	SELENON
Non-Canonical Wnt Signaling Pathway (GO:0035567)	1/43	2.33	0.084544	0.149627	11.8554	29.2885	CELSR2
Cell Cycle G2/M Phase Transition (GO:0044839)	1/43	2.33	0.084544	0.149627	11.8554	29.2885	PLK1
Cellular Response to Ketone (GO:1901655)	1/45	2.22	0.0883017	0.155107	11.3153	27.4623	ADCY1
Negative Regulation of BMP Signaling Pathway (GO:0030514)	1/45	2.22	0.0883017	0.155107	11.3153	27.4623	SORL1
Regulation of Cyclin-Dependent Protein Serine/Threonine Kinase Activity (GO:0000079)	1/46	2.17	0.0901749	0.156059	11.0633	26.6184	PSRC1
Male Gonad Development (GO:0008584)	1/46	2.17	0.0901749	0.156059	11.0633	26.6184	KIT
Development of Primary Male Sexual Characteristics (GO:0046546)	1/46	2.17	0.0901749	0.156059	11.0633	26.6184	KIT
Regulation of Cell-Cell Adhesion (GO:0022407)	1/46	2.17	0.0901749	0.156059	11.0633	26.6184	CELSR2
Positive Regulation of miRNA Transcription (GO:1902895)	1/47	2.13	0.0920444	0.156409	10.8223	25.8164	MYB
Mitotic Nuclear Division (GO:0140014)	1/47	2.13	0.0920444	0.156409	10.8223	25.8164	PLK1
Chromosome Organization (GO:0051276)	1/47	2.13	0.0920444	0.156409	10.8223	25.8164	CDCA8
Double-Strand Break Repair via Nonhomologous End Joining (GO:0006303)	1/47	2.13	0.0920444	0.156409	10.8223	25.8164	PLK1
Stem Cell Differentiation (GO:0048863)	1/47	2.13	0.0920444	0.156409	10.8223	25.8164	KIT
Oligosaccharide Metabolic Process (GO:0009311)	1/48	2.08	0.09391	0.158431	10.5915	25.0533	ST8SIA1
Mitotic G2/M Transition Checkpoint (GO:0044818)	1/48	2.08	0.09391	0.158431	10.5915	25.0533	PLK1
Positive Regulation of Intracellular Transport (GO:0032388)	1/49	2.04	0.095772	0.15928	10.3703	24.3265	SORL1
Regulation of Insulin Receptor Signaling Pathway (GO:0046626)	1/49	2.04	0.095772	0.15928	10.3703	24.3265	SORL1
Activation of Protein Kinase Activity (GO:0032147)	1/49	2.04	0.095772	0.15928	10.3703	24.3265	TPX2
Positive Regulation of Smooth Muscle Cell Proliferation (GO:0048661)	1/49	2.04	0.095772	0.15928	10.3703	24.3265	IGFBP5
Regulation of Mitotic Metaphase/Anaphase Transition (GO:0030071)	1/51	1.96	0.0994847	0.163713	9.9545	22.9725	PLK1
Macromolecule Glycosylation (GO:0043413)	1/51	1.96	0.0994847	0.163713	9.9545	22.9725	ST8SIA1
Positive Regulation of Actin Filament Bundle Assembly (GO:0032233)	1/51	1.96	0.0994847	0.163713	9.9545	22.9725	MTSS1
Inflammatory Response (GO:0006954)	2/261	0.77	0.0998911	0.163807	3.9006	8.9857	KIT;ADCY1
Glycoprotein Metabolic Process (GO:0009100)	1/52	1.92	0.101335	0.165022	9.7588	22.3411	ST8SIA1
Signal Transduction by P53 Class Mediator (GO:0072331)	1/52	1.92	0.101335	0.165022	9.7588	22.3411	GTSE1
B Cell Differentiation (GO:0030183)	1/53	1.89	0.103183	0.165162	9.5707	21.7374	KIT
Positive Regulation of miRNA Metabolic Process (GO:2000630)	1/53	1.89	0.103183	0.165162	9.5707	21.7374	MYB
Regulation of Microtubule Polymerization (GO:0031113)	1/53	1.89	0.103183	0.165162	9.5707	21.7374	PSRC1
Regulation of Release of Sequestered Calcium Ion Into Cytosol (GO:0051279)	1/53	1.89	0.103183	0.165162	9.5707	21.7374	SELENON
Regulation of Smoothened Signaling Pathway (GO:0008589)	1/53	1.89	0.103183	0.165162	9.5707	21.7374	GLI3
Positive Regulation of RNA Biosynthetic Process (GO:1902680)	3/555	0.54	0.104561	0.166409	2.7756	6.2673	PSRC1;MYB;GLI3
Gonad Development (GO:0008406)	1/54	1.85	0.105026	0.166409	9.3896	21.16	KIT
Regulation of Smooth Muscle Cell Proliferation (GO:0048660)	1/54	1.85	0.105026	0.166409	9.3896	21.16	IGFBP5
Glycolipid Biosynthetic Process (GO:0009247)	1/55	1.82	0.106866	0.168188	9.2153	20.6071	ST8SIA1
Regulation of Receptor Signaling Pathway via JAK-STAT (GO:0046425)	1/55	1.82	0.106866	0.168188	9.2153	20.6071	KIT
Regulation of Protein Localization to Nucleus (GO:1900180)	1/56	1.79	0.108702	0.169372	9.0473	20.0772	PLK1
Cellular Response to Alcohol (GO:0097306)	1/56	1.79	0.108702	0.169372	9.0473	20.0772	ADCY1
Response to Peptide Hormone (GO:0043434)	1/56	1.79	0.108702	0.169372	9.0473	20.0772	IGFBP5
Negative Regulation of Signal Transduction (GO:0009968)	2/277	0.72	0.110303	0.170732	3.6707	8.0921	IGFBP5;GLI3
Plasma Membrane Bounded Cell Projection Assembly (GO:0120031)	2/277	0.72	0.110303	0.170732	3.6707	8.0921	KIT;MTSS1
Regulation of Mitotic Nuclear Division (GO:0007088)	1/58	1.72	0.112362	0.172199	8.7289	19.0817	MKI67
Sprouting Angiogenesis (GO:0002040)	1/58	1.72	0.112362	0.172199	8.7289	19.0817	E2F8
Negative Regulation of Protein-Containing Complex Assembly (GO:0031333)	1/59	1.69	0.114187	0.172199	8.578	18.6136	SORL1
Homophilic Cell Adhesion via Plasma Membrane Adhesion Molecules (GO:0007156)	1/59	1.69	0.114187	0.172199	8.578	18.6136	CELSR2
Cellular Response to Calcium Ion (GO:0071277)	1/59	1.69	0.114187	0.172199	8.578	18.6136	ADCY1
Microtubule Cytoskeleton Organization Involved in Mitosis (GO:1902850)	1/59	1.69	0.114187	0.172199	8.578	18.6136	PLK1
Renal System Development (GO:0072001)	1/59	1.69	0.114187	0.172199	8.578	18.6136	CENPF
Mitotic DNA Damage Checkpoint Signaling (GO:0044773)	1/59	1.69	0.114187	0.172199	8.578	18.6136	PLK1
Positive Regulation of Cell Cycle (GO:0045787)	1/60	1.67	0.116009	0.174385	8.4322	18.1637	PSRC1
Positive Regulation of DNA-templated Transcription (GO:0045893)	5/1274	0.39	0.1174	0.175912	2.0456	4.382	FOXD3;PSRC1;MYB;GLI3;E2F8
post-Golgi Vesicle-Mediated Transport (GO:0006892)	1/61	1.64	0.117826	0.175989	8.2912	17.7312	SORL1
Cellular Response to Light Stimulus (GO:0071482)	1/62	1.61	0.11964	0.178131	8.1549	17.3151	BMF
Positive Regulation of Peptidyl-Tyrosine Phosphorylation (GO:0050731)	1/63	1.59	0.121451	0.180254	8.023	16.9144	KIT
Cell Surface Receptor Protein Tyrosine Kinase Signaling Pathway (GO:0007169)	2/296	0.68	0.123023	0.180649	3.4301	7.1875	KIT;MTSS1
G1/S Transition of Mitotic Cell Cycle (GO:0000082)	1/64	1.56	0.123257	0.180649	7.8952	16.5285	CCNF
Regulation of Synapse Assembly (GO:0051963)	1/64	1.56	0.123257	0.180649	7.8952	16.5285	CYFIP2
Positive Regulation of T Cell Differentiation (GO:0045582)	1/64	1.56	0.123257	0.180649	7.8952	16.5285	GLI3
Anterior/Posterior Pattern Specification (GO:0009952)	1/65	1.54	0.12506	0.182153	7.7715	16.1566	CELSR2
Negative Regulation of Autophagy (GO:0010507)	1/65	1.54	0.12506	0.182153	7.7715	16.1566	BMF
Regulation of miRNA Transcription (GO:1902893)	1/66	1.52	0.12686	0.183069	7.6515	15.7979	MYB
Regulation of Neurogenesis (GO:0050767)	1/66	1.52	0.12686	0.183069	7.6515	15.7979	SORL1
Cell Cycle G1/S Phase Transition (GO:0044843)	1/66	1.52	0.12686	0.183069	7.6515	15.7979	CCNF
Chordate Embryonic Development (GO:0043009)	1/67	1.49	0.128656	0.185091	7.5352	15.4518	FOXD3
Protein Transport (GO:0015031)	2/308	0.65	0.131237	0.188227	3.2936	6.6885	NEURL1B;CENPF
Positive Regulation of Intracellular Protein Transport (GO:0090316)	1/69	1.45	0.132237	0.189082	7.3129	14.7951	SORL1
Lysosomal Transport (GO:0007041)	1/70	1.43	0.134022	0.190473	7.2065	14.4833	SORL1
Peptidyl-Serine Phosphorylation (GO:0018105)	1/70	1.43	0.134022	0.190473	7.2065	14.4833	PLK1
Positive Regulation of Proteasomal Ubiquitin-Dependent Protein Catabolic Process (GO:0032436)	1/71	1.41	0.135803	0.191843	7.1032	14.1819	PLK1
Positive Regulation of Protein Polymerization (GO:0032273)	1/71	1.41	0.135803	0.191843	7.1032	14.1819	PSRC1
Protein Modification by Small Protein Conjugation (GO:0032446)	2/316	0.63	0.136784	0.192648	3.2084	6.3826	CCNF;PLK1
Kidney Development (GO:0001822)	1/72	1.39	0.137581	0.19319	7.0028	13.8904	CENPF
Regulation of Cell Cycle (GO:0051726)	2/318	0.63	0.138179	0.193366	3.1878	6.3092	CCNF;PLK1
Negative Regulation of Epithelial Cell Proliferation (GO:0050680)	1/73	1.37	0.139355	0.193366	6.9052	13.6083	MTSS1
Neuropeptide Signaling Pathway (GO:0007218)	1/73	1.37	0.139355	0.193366	6.9052	13.6083	SORL1
Negative Regulation of Cellular Response to Growth Factor Stimulus (GO:0090288)	1/73	1.37	0.139355	0.193366	6.9052	13.6083	SORL1
Positive Regulation of Transcription by RNA Polymerase II (GO:0045944)	4/983	0.41	0.140819	0.193691	2.0959	4.1086	FOXD3;MYB;GLI3;E2F8
Myeloid Leukocyte Differentiation (GO:0002573)	1/74	1.35	0.141126	0.193691	6.8103	13.3352	KIT
Positive Regulation of Cytoskeleton Organization (GO:0051495)	1/74	1.35	0.141126	0.193691	6.8103	13.3352	MTSS1
Protein-Containing Complex Assembly (GO:0065003)	2/323	0.62	0.141681	0.193691	3.1373	6.1309	CENPF;CENPA
Regulation of DNA-templated Transcription (GO:0006355)	7/2139	0.33	0.142699	0.193691	1.7215	3.3518	FOXD3;CENPF;PSRC1;MYB;CELSR2;GLI3;E2F8
Positive Regulation of Protein Localization to Nucleus (GO:1900182)	1/75	1.33	0.142894	0.193691	6.7179	13.0707	PLK1
Positive Regulation of Protein Serine/Threonine Kinase Activity (GO:0071902)	1/75	1.33	0.142894	0.193691	6.7179	13.0707	PSRC1
Peptidyl-Serine Modification (GO:0018209)	1/75	1.33	0.142894	0.193691	6.7179	13.0707	PLK1
Glycoprotein Biosynthetic Process (GO:0009101)	1/76	1.32	0.144657	0.193841	6.628	12.8145	ST8SIA1
Positive Regulation of Protein Ubiquitination (GO:0031398)	1/76	1.32	0.144657	0.193841	6.628	12.8145	PLK1
Negative Regulation of Supramolecular Fiber Organization (GO:1902904)	1/76	1.32	0.144657	0.193841	6.628	12.8145	TPX2
Lymphocyte Differentiation (GO:0030098)	1/76	1.32	0.144657	0.193841	6.628	12.8145	KIT
Cellular Response to UV (GO:0034644)	1/77	1.3	0.146417	0.195084	6.5405	12.5661	BMF
Regulation of BMP Signaling Pathway (GO:0030510)	1/77	1.3	0.146417	0.195084	6.5405	12.5661	SORL1
Cell Chemotaxis (GO:0060326)	1/78	1.28	0.148174	0.196866	6.4552	12.3253	KIT
Regulation of Double-Strand Break Repair via Homologous Recombination (GO:0010569)	1/80	1.25	0.151677	0.199821	6.2911	11.8651	PLK1
Signal Transduction in Response to DNA Damage (GO:0042770)	1/80	1.25	0.151677	0.199821	6.2911	11.8651	GTSE1
Negative Regulation of Cellular Component Organization (GO:0051129)	1/80	1.25	0.151677	0.199821	6.2911	11.8651	SORL1
Positive Regulation of Organelle Organization (GO:0010638)	1/81	1.23	0.153423	0.201555	6.2122	11.6451	BMF
Wnt Signaling Pathway (GO:0016055)	1/83	1.2	0.156904	0.204981	6.0601	11.224	CELSR2
Sphingolipid Biosynthetic Process (GO:0030148)	1/83	1.2	0.156904	0.204981	6.0601	11.224	ST8SIA1
Monoatomic Cation Homeostasis (GO:0055080)	1/84	1.19	0.15864	0.206672	5.9867	11.0223	SELENON
Carbohydrate Metabolic Process (GO:0005975)	1/85	1.18	0.160372	0.207775	5.9152	10.8263	ST8SIA1
Cell Morphogenesis Involved in Neuron Differentiation (GO:0048667)	1/85	1.18	0.160372	0.207775	5.9152	10.8263	CELSR2
Positive Regulation of Protein Kinase Activity (GO:0045860)	1/88	1.14	0.165547	0.213301	5.7103	10.2701	TPX2
Positive Regulation of Ubiquitin-Dependent Protein Catabolic Process (GO:2000060)	1/88	1.14	0.165547	0.213301	5.7103	10.2701	PLK1
Establishment of Protein Localization to Organelle (GO:0072594)	1/90	1.11	0.16898	0.217128	5.5815	9.9237	NEURL1B
Positive Regulation of Response to Stimulus (GO:0048584)	1/92	1.09	0.172399	0.220916	5.4582	9.5953	SELENON
Regulation of Epithelial Cell Proliferation (GO:0050678)	1/93	1.08	0.174104	0.222492	5.3986	9.4374	MTSS1
Protein Ubiquitination (GO:0016567)	2/369	0.54	0.174727	0.222682	2.7377	4.7759	CCNF;PLK1
Response to Calcium Ion (GO:0051592)	1/95	1.05	0.177502	0.22459	5.2832	9.1335	ADCY1
Retrograde Transport, Endosome to Golgi (GO:0042147)	1/95	1.05	0.177502	0.22459	5.2832	9.1335	SORL1
Protein Phosphorylation (GO:0006468)	2/373	0.54	0.177661	0.22459	2.7076	4.6784	PLK1;KIT
B Cell Activation (GO:0042113)	1/96	1.04	0.179196	0.225317	5.2274	8.9873	KIT
Sensory Perception of Sound (GO:0007605)	1/96	1.04	0.179196	0.225317	5.2274	8.9873	KIT
Negative Regulation of Cell Population Proliferation (GO:0008285)	2/379	0.53	0.182077	0.228327	2.6637	4.5371	IGFBP5;MTSS1
Positive Regulation of Proteasomal Protein Catabolic Process (GO:1901800)	1/98	1.02	0.182574	0.22834	5.1191	8.7055	PLK1
Positive Regulation of Protein Catabolic Process (GO:0045732)	1/99	1.01	0.184258	0.229223	5.0666	8.5697	SORL1
Cytosolic Transport (GO:0016482)	1/99	1.01	0.184258	0.229223	5.0666	8.5697	SORL1
Response to UV (GO:0009411)	1/100	1	0.185939	0.230702	5.0152	8.4372	BMF
Positive Regulation of Protein Localization (GO:1903829)	1/102	0.98	0.18929	0.233624	4.9153	8.1815	PLK1
Negative Regulation of Translation (GO:0017148)	1/102	0.98	0.18929	0.233624	4.9153	8.1815	IGFBP5
Positive Regulation of Protein-Containing Complex Assembly (GO:0031334)	1/105	0.95	0.194291	0.238541	4.7728	7.8198	BMF
Calcium Ion Homeostasis (GO:0055074)	1/105	0.95	0.194291	0.238541	4.7728	7.8198	SELENON
Axon Development (GO:0061564)	1/107	0.93	0.197609	0.241981	4.6823	7.5922	NREP
Regulation of Proteasomal Ubiquitin-Dependent Protein Catabolic Process (GO:0032434)	1/109	0.92	0.200913	0.245386	4.5951	7.3747	PLK1
External Encapsulating Structure Organization (GO:0045229)	1/111	0.9	0.204204	0.247472	4.5111	7.1666	MATN2
Extracellular Structure Organization (GO:0043062)	1/111	0.9	0.204204	0.247472	4.5111	7.1666	MATN2
Positive Regulation of Cellular Component Organization (GO:0051130)	1/111	0.9	0.204204	0.247472	4.5111	7.1666	BMF
Cellular Response to Metal Ion (GO:0071248)	1/112	0.89	0.205844	0.248817	4.4703	7.0659	ADCY1
T Cell Activation (GO:0042110)	1/114	0.88	0.209116	0.252121	4.3907	6.8709	KIT
Negative Regulation of Growth (GO:0045926)	1/115	0.87	0.210746	0.253436	4.352	6.7765	PSRC1
Antimicrobial Humoral Immune Response Mediated by Antimicrobial Peptide (GO:0061844)	1/116	0.86	0.212373	0.25474	4.3139	6.684	CXCL14
Negative Regulation of Canonical Wnt Signaling Pathway (GO:0090090)	1/117	0.85	0.213998	0.256033	4.2765	6.5935	GLI3
Regulation of Transforming Growth Factor Beta Receptor Signaling Pathway (GO:0017015)	1/120	0.83	0.21885	0.260509	4.1681	6.3328	NREP
Negative Regulation of Catabolic Process (GO:0009895)	1/120	0.83	0.21885	0.260509	4.1681	6.3328	BMF
Enzyme-Linked Receptor Protein Signaling Pathway (GO:0007167)	1/121	0.83	0.220461	0.261102	4.1331	6.2494	MTSS1
Negative Regulation of Cell Growth (GO:0030308)	1/121	0.83	0.220461	0.261102	4.1331	6.2494	PSRC1
- Reg of Transmembrane Receptor Prot Serine/Threonine Kinase Sgnlng Pway (GO:0090101)	1/122	0.82	0.222069	0.262343	4.0988	6.1677	SORL1
Protein Localization to Nucleus (GO:0034504)	1/127	0.79	0.230059	0.2711	3.9351	5.7823	PLK1
Golgi Organization (GO:0007030)	1/128	0.78	0.231648	0.272288	3.9039	5.7097	PLK1
Regulation of Protein Catabolic Process (GO:0042176)	1/129	0.78	0.233233	0.273466	3.8732	5.6383	SORL1
Epithelial Cell Differentiation (GO:0030855)	1/132	0.76	0.23797	0.277631	3.784	5.4323	E2F8
Neuron Projection Guidance (GO:0097485)	1/132	0.76	0.23797	0.277631	3.784	5.4323	CYFIP2
Protein Targeting (GO:0006605)	1/136	0.74	0.244241	0.283537	3.6711	5.1748	SORL1
Receptor-Mediated Endocytosis (GO:0006898)	1/136	0.74	0.244241	0.283537	3.6711	5.1748	SORL1
Negative Regulation of Cell Motility (GO:2000146)	1/139	0.72	0.248911	0.288245	3.5908	4.9935	IGFBP5
Protein Autophosphorylation (GO:0046777)	1/140	0.71	0.250462	0.289327	3.5647	4.9352	KIT
Regulation of Cell Adhesion (GO:0030155)	1/142	0.7	0.253553	0.292178	3.5138	4.8216	CELSR2
Protein Glycosylation (GO:0006486)	1/145	0.69	0.258168	0.296766	3.4401	4.6584	ST8SIA1
Negative Regulation of Wnt Signaling Pathway (GO:0030178)	1/146	0.68	0.259699	0.297797	3.4162	4.6058	GLI3
Antimicrobial Humoral Response (GO:0019730)	1/147	0.68	0.261228	0.29818	3.3926	4.5541	CXCL14
Positive Regulation of Cell Population Proliferation (GO:0008284)	2/484	0.41	0.261305	0.29818	2.0722	2.7811	SAPCD2;KIT
Protein Localization to Organelle (GO:0033365)	1/151	0.66	0.267313	0.304295	3.3015	4.3558	SORL1
Axon Guidance (GO:0007411)	1/152	0.66	0.268826	0.305277	3.2795	4.3082	CYFIP2
Adenylate Cyclase-Activating G Protein-Coupled Receptor Signaling Pathway (GO:0007189)	1/153	0.65	0.270336	0.306251	3.2577	4.2614	ADCY1
Neuron Projection Morphogenesis (GO:0048812)	1/157	0.64	0.276348	0.312306	3.1736	4.0815	CELSR2
Regulation of Cellular Component Organization (GO:0051128)	1/159	0.63	0.279335	0.314923	3.1331	3.9957	MKI67
+ Reg of Phosphatidylinositol 3-Kinase/Prot Kinase B Signal Transduction (GO:0051897)	1/162	0.62	0.283794	0.319183	3.0742	3.872	KIT
Cellular Response to Nitrogen Compound (GO:1901699)	1/169	0.59	0.294093	0.329975	2.9451	3.6044	IGFBP5
Brain Development (GO:0007420)	1/170	0.59	0.295552	0.330821	2.9275	3.5684	CENPF
Cell-Cell Adhesion via Plasma-Membrane Adhesion Molecules (GO:0098742)	1/171	0.58	0.297009	0.33166	2.9101	3.5329	CELSR2
Nitrogen Compound Transport (GO:0071705)	1/172	0.58	0.298462	0.332491	2.893	3.4979	CENPF
Membrane Organization (GO:0061024)	1/173	0.58	0.299913	0.333315	2.876	3.4635	KIF20A
Positive Regulation of DNA-binding Transcription Factor Activity (GO:0051091)	1/174	0.57	0.30136	0.334132	2.8592	3.4295	KIT
Double-Strand Break Repair (GO:0006302)	1/176	0.57	0.304247	0.336537	2.8263	3.363	PLK1
Protein Modification Process (GO:0036211)	2/545	0.37	0.30789	0.339766	1.8337	2.1601	ST8SIA1;PLK1
Extracellular Matrix Organization (GO:0030198)	1/182	0.55	0.312837	0.344415	2.7318	3.1745	MATN2
Positive Regulation of Catabolic Process (GO:0009896)	1/183	0.55	0.314259	0.34517	2.7166	3.1446	SORL1
Negative Regulation of Cell Migration (GO:0030336)	1/184	0.54	0.315678	0.345918	2.7016	3.1151	IGFBP5
Axonogenesis (GO:0007409)	1/200	0.5	0.337992	0.369283	2.4824	2.6928	CYFIP2
Regulation of Translation (GO:0006417)	1/201	0.5	0.339363	0.369283	2.4699	2.6692	IGFBP5
Regulation of Cell Differentiation (GO:0045595)	1/201	0.5	0.339363	0.369283	2.4699	2.6692	NREP
Adenylate Cyclase-Modulating G Protein-Coupled Receptor Signaling Pathway (GO:0007188)	1/202	0.5	0.340731	0.369914	2.4575	2.6459	ADCY1
Regulation of Signal Transduction (GO:0009966)	1/211	0.47	0.35292	0.382262	2.3511	2.4487	IGFBP5
Regulation of Canonical Wnt Signaling Pathway (GO:0060828)	1/216	0.46	0.359596	0.388596	2.2958	2.3481	GLI3
Regulation of Phosphatidylinositol 3-Kinase/Protein Kinase B Signal Transduction (GO:0051896)	1/219	0.46	0.363569	0.391986	2.2639	2.2906	KIT
Negative Regulation of Cell Differentiation (GO:0045596)	1/220	0.45	0.364888	0.392506	2.2534	2.2718	MYB
Positive Regulation of Cellular Process (GO:0048522)	2/622	0.32	0.365956	0.392754	1.5996	1.608	SAPCD2;KIT
Regulation of Cell Growth (GO:0001558)	1/222	0.45	0.367519	0.39353	2.2328	2.235	PSRC1
Regulation of Autophagy (GO:0010506)	1/230	0.43	0.377934	0.403761	2.1539	2.0959	BMF
Cellular Response to Lipid (GO:0071396)	1/234	0.43	0.383078	0.408327	2.1165	2.0308	ADCY1
Positive Regulation of Developmental Process (GO:0051094)	1/245	0.41	0.397013	0.42222	2.02	1.866	SORL1
Positive Regulation of Programmed Cell Death (GO:0043068)	1/248	0.4	0.40076	0.425241	1.9951	1.8243	BMF
Positive Regulation of Cell Motility (GO:2000147)	1/249	0.4	0.402004	0.425598	1.987	1.8107	KIT
Regulation of Gene Expression (GO:0010468)	3/1127	0.27	0.409125	0.431495	1.3229	1.1823	MYB;CELSR2;GLI3
Cytokine-Mediated Signaling Pathway (GO:0019221)	1/255	0.39	0.409414	0.431495	1.9395	1.732	KIT
Positive Regulation of Signal Transduction (GO:0009967)	1/256	0.39	0.410641	0.431817	1.9318	1.7193	SORL1
Regulation of MAPK Cascade (GO:0043408)	1/260	0.38	0.415521	0.435972	1.9015	1.67	KIT
Regulation of Apoptotic Process (GO:0042981)	2/704	0.28	0.425832	0.445793	1.4067	1.201	PLK1;BMF
Cellular Component Assembly (GO:0022607)	1/277	0.36	0.435827	0.45524	1.7829	1.4807	CYFIP2
Cellular Response to Cytokine Stimulus (GO:0071345)	1/289	0.35	0.449745	0.468734	1.7076	1.3645	KIT
Positive Regulation of Cell Differentiation (GO:0045597)	1/297	0.34	0.458836	0.477149	1.6607	1.2938	GDPD5
Phosphorylation (GO:0016310)	1/298	0.34	0.459963	0.477262	1.6551	1.2853	PLK1
DNA Repair (GO:0006281)	1/302	0.33	0.464444	0.479789	1.6327	1.2522	PLK1
Regulation of Intracellular Signal Transduction (GO:1902531)	1/302	0.33	0.464444	0.479789	1.6327	1.2522	MOB3B
Regulation of Cell Population Proliferation (GO:0042127)	2/769	0.26	0.471292	0.485793	1.2832	0.9653	SAPCD2;KIT
Positive Regulation of Apoptotic Process (GO:0043065)	1/313	0.32	0.476582	0.490169	1.5743	1.1667	BMF
Positive Regulation of Cytokine Production (GO:0001819)	1/325	0.31	0.489518	0.502372	1.515	1.0822	SORL1
Regulation of Transcription by RNA Polymerase II (GO:0006357)	5/2250	0.22	0.496042	0.507956	1.0959	0.7683	FOXD3;MYB;PLK1;GLI3;E2F8
Proteasome-Mediated Ubiquitin-Dependent Protein Catabolic Process (GO:0043161)	1/340	0.29	0.505249	0.516257	1.4469	0.9878	CCNF
Positive Regulation of Cell Migration (GO:0030335)	1/344	0.29	0.509364	0.51933	1.4297	0.9645	KIT
Positive Regulation of MAPK Cascade (GO:0043410)	1/362	0.28	0.52747	0.536623	1.3572	0.8682	KIT
Negative Regulation of Gene Expression (GO:0010629)	1/364	0.27	0.529441	0.537463	1.3496	0.8582	IGFBP5
Negative Regulation of Programmed Cell Death (GO:0043069)	1/382	0.26	0.546823	0.55391	1.2846	0.7755	PLK1
Cellular Response to Oxygen-Containing Compound (GO:1901701)	1/384	0.26	0.548716	0.554628	1.2778	0.7669	IGFBP5
Positive Regulation of Multicellular Organismal Process (GO:0051240)	1/407	0.25	0.56993	0.574833	1.204	0.6769	SORL1
Organelle Organization (GO:0006996)	1/437	0.23	0.596144	0.599982	1.1194	0.5791	CDCA8
Negative Regulation of Apoptotic Process (GO:0043066)	1/475	0.21	0.627119	0.629805	1.0277	0.4795	PLK1
Negative Regulation of Cellular Process (GO:0048523)	1/531	0.19	0.668583	0.670012	0.9165	0.369	PSRC1
Positive Regulation of Intracellular Signal Transduction (GO:1902533)	1/652	0.15	0.743404	0.743404	0.7415	0.2199	KIT

[truncated: 1 more sheets: ARCHS4_Kinases_DN]
