# Supplementary material
Source: Research Square preprint supplement (doi:10.21203/rs.3.rs-9577216/v1)
Supplement: Supplementary file 3 [file 6dbcf06b66017fde09ca571e.docx]

***Supplementary Figures and Tables Legends***

***Supplementary Figure 1. Validation of senolytic candidates and dose-response profiling.***

***A.*** *Quantification of cytotoxicity (CellTox, normalized to CyQUANT) in MM27 cells treated with vehicle (DMSO), P5091(5 µM), auranofin (1 µM) or their combination, showing a marked increase in cytotoxicity upon combination treatment.* ***B.*** *Quantification of cell viability (CyQUANT, normalized to DMSO) in MM27 cells treated with vehicle (DMSO), P5091(5 µM), LY2090314 (1 µM) or their combination, showing a marked decrease in viability upon combination treatment.* ***C.*** *Quantification of cytotoxicity (CellTox, normalized to CyQUANT) in MM27 cells treated with vehicle (DMSO), P5091(5 µM), LY209031 (1 µM) or their combination, showing a mild increase in cytotoxicity upon combination treatment* ***D.*** *Dose-response analysis of auranofin in the presence or absence of P5091, showing a concentration-dependent increase in cytotoxicity selectively in P5091-treated cells.* ***E.*** *Dose-response analysis of LY2090314 (72 h) in the presence or absence of P5091, assessed by CyQUANT (viability) and CellTox (cytotoxicity).* ***F.*** *Dose- response analysis of LY2090313 on cytotoxicity, showing moderate induction of cell death with partial enhancement in P5091-treated cells. Data represent mean ± SD of ≥3 independent biological replicates. Statistical analysis was performed using one-way ANOVA with multiple comparisons (Tukey’s correction) (***P < 0.001, ****P < 0.0001; ns, not significant).*

***Supplementary Figure 2. Optimization of senescence-inducing conditions and cell-cycle profiling in MM27 cells.***

***A.*** *Dose-response analysis of senescence-inducing agents assessed by CyQUANT viability assay after 5 days of treatment. MM27 cells were treated with increasing concentrations of volasertib (12.5-25-50 nM), palbociclib (62.5-125-250 nM, everolimus (62.5-125-250 nM) and temozolomide (10-30-100 µM). Doses inducing ~50% reduction in cell viability were selected for subsequent experiments.* ***B.*** *Representative BrdU/PI flow cytometry profiles of MM27 cells treated for 24 h with vehicle (DMSO), volasertib (25 nM), palbociclib (62.5 nM), everolimus (62.5 nM) or temozolomide (100 µM). Data represent mean ± SD of ≥3 independent biological replicates. Statistical analysis was performed using one-way ANOVA with multiple comparisons (***P < 0.001, ****P < 0.0001; ns, not significant).*

***Supplementary Figure 3. Volasertib response and characterization of melanoma PDX models.***

***A.*** *Unsupervised hierarchical clustering of gene-wise z-score–normalized expression values [log2(TPM+1)] for genes included in Tsoi et al. (2018) and Belote et al. (2021) transcriptional signatures across PDX models (MM27, MM13, MM16). Clustering was performed using Spearman correlation distance with average linkage (UPGMA). Color scale represents relative gene expression as z-scores, with negative values shown in blue, baseline (0) in white, and positive values in red.* ***B.*** *MITF-AXL index across PDX models.* *MITF–AXL index calculated as log2(TPM+1)_MITF – log2(TPM+1)_AXL for each PDX model. Positive values indicate relative enrichment of MITF-associated differentiation programs, whereas negative values indicate relative enrichment of AXL-associated invasive programs.* ***C.*** *Immunoblot analysis of MITF and AXL expression in MM27, MM13 and MM16 cells. Vinculin was used as loading control.* ***D.*** *Clustered heatmap of 30-gene mitotic signature across PDX models. Gene expression values (log2(TPM+1)) were standardized as row-wise z-scores and genes were hierarchically clustered using Spearman correlation distance and average linkage. Red indicates relatively higher expression and blue relatively lower expression. The analysis reveals coordinated enrichment of mitotic regulators in MM13 and MM27 relative to MM16.* ***E.*** *Dose response curves and IC50 determination for volasertib after 72 h treatment in melanoma PDXs with distinct genetic backgrounds: MM27 (BRAFmut); MM13 and MM16 (NRASmut).* ***F.*** *Representative density plots of MM27, MM13 and MM16 cells treated with vehicle (DMSO) or volasertib (25 nM for MM27; 50 nM for MM13 and MM16) for 72 h, showing G2/M accumulation. Data are presented as mean ± SD of ≥3 independent biological replicates. Statistical analysis was performed using one-way or two-way ANOVA with multiple comparisons (***P < 0.001, ****P < 0.0001; ns, not significant).*

***Supplementary Figure 4. In vivo characterization of treatment response and tolerability.***

***A.*** *Tumor volumes of MM27 and MM13 xenografts at treatment initiation (~100 mm³).* ***B.*** *Body weight monitoring during treatment, indicating absence of overt toxicity.* ***C.*** *Representative images of MM27 tumors collected after 1 week of volasertib treatment and stained for SA-β-gal. Quantification of SA-β-gal signal intensity (violin plot) confirms senescence induction in vivo. Data are presented as mean ± SD. Statistical significance was determined using one-way ANOVA with multiple comparisons (*P < 0.05, **P < 0.01, ***P < 0.001, ****P < 0.0001; ns, not significant).*

***Supplementary Figure 5. Transcriptomic characterization of treatment responses in melanoma PDX models.***

***A.*** *Principal component analysis (PCA) of MM27 and MM13 samples showing separation by model and treatment condition (DMSO, volasertib, auranofin, combination).* ***B.*** *PCA plots for each PDX model highlighting treatment-specific clustering.* ***C.*** *Volcano plots of differentially expressed genes following single-agent and combination treatments in MM27 and MM13 cells. Selected genes are indicated.* ***D.*** *Venn diagrams showing overlap of upregulated and downregulated DEGs between MM27 and MM13.* ***E.*** *RT-qPCR validation of selected genes (HMOX1, SLC7A11) in MM27 and MM13 following combination treatment.* ***F.*** *Pathway enrichment analysis of auranofin-treated cells highlighting oxidative stress and ferroptosis-related programs.* ***G.*** *GSEA plots showing enrichment of senescence-associated pathways following volasertib treatment. Normalized Enrichment Score (NES) and False Discovery Rate (FDR) are indicated.**Data are presented as mean ± SD from at least three independent biological replicates unless otherwise indicated. Statistical significance was determined using one-way ANOVA with multiple comparisons (*P < 0.05, **P < 0.01, ***P < 0.001, ****P < 0.0001; ns, not significant).*

***Supplementary Figure 6. Validation of oxidative stress, metabolic alterations, and DNA damage induced by combination treatment.***

***A.*** *Representative histograms for intracellular iron levels (FerroOrange) in MM27 cells following sequential treatment with DMSO, volasertib, auranofin or the combination.* ***B.*** *Relative ROS level in MM13 supernatants, assessed by ROS-Glo™. Cells were sequentially treated with volasertib (48 h) followed by auranofin (72 h) and readout was normalized on live cell density (CyQUANT) and DMSO.* ***C.*** *Split-channel images of MM27, MM13 and MM16 cells showing nuclei (DAPI) and γH2AX (AF647), across indicated treatment conditions. Scale bars, 20 µm.* ***D.*** *Box plots showing cell area per nucleus (phalloidin-based, µm²) in MM27, MM13 and MM16 across treatment conditions, quantified using a custom Fiji macro (Supplementary_Macro_CellArea.ijm).* ***E.*** *Stacked bar plots showing the distribution of cells with 0, 1, or >1 micronuclei per nucleus in MM27, MM13 and MM16 across treatment conditions. Micronuclei were quantified by automated segmentation with subsequent manual curation using a custom Fiji macro (Supplementary_Macro_Micronuclei.ijm).* ***F.*** *γH2AX mean fluorescence intensity (MFI, AF647) per nucleus across treatment conditions in MM27, MM13 and MM16, quantified using the custom Fiji macro (Supplementary_Macro_yH2AX.ijm). For all conditions at least 4 fields per biological replicate were quantified across 3 independent biological replicates. Full details of the image analysis pipeline are provided in the Supplementary Materials and Methods. Unless otherwise stated, data are presented as mean ± SD and statistical significance was determined using one-way or two-way ANOVA with multiple comparisons (Tukey’s correction). For panel E, differences in micronuclei distribution were assessed by chi-square test of independence; pairwise comparisons were corrected for multiple testing using the Holm–Bonferroni method (*P < 0.05, **P < 0.01, ***P < 0.001, ****P < 0.0001; ns, not significant).*

***Supplementary Table 1.*** *Primary screening: determination of cell viability of senescent MM27 cells (P5091 + compound library)*

***Supplementary Table 2.*** *Validation screening: determination of cell viability with and without P5091 (79 compounds)*

***Supplementary Table 3****. Synergy index of 54 validation screening hits*

***Supplementary Table 4.*** *Transcriptome-wide gene expression across MM27, MM13 and MM16 PDX models*

***Supplementary Table 5.*** *Melanoma transcriptional cell-state signatures across PDX models*

***Supplementary Table 6.*** *Drug vulnerability and mitotic dependency indices across PDX models*

***Supplementary Table 7.*** *MM27: EnrichR analysis + DEG lists (Vol+Aur vs DMSO)*

***Supplementary Table 8.*** *MM13: DEGs lists and EnrichR analysis (Vol+Aur vs DMSO)*

***Supplementary Table 9.*** *MM27/MM13 common DEG: EnrichR pathway analysis (Vol+Aur vs DMSO)*

***Supplementary Table 10.*** *MM27/MM13 common DEGs: EnrichR pathway analysis (Auranofin vs DMSO)*

***Supplementary Table 11.*** *GSEA results | MM27 and MM13 | Aur vs DMSO, Vol vs DMSO, Vol+Aur vs DMSO*

***Supplementary Table 12****. Stress-response gene signatures: expression and enrichment across MM27, MM13 and MM16 PDX models*
