# Supplementary material
Source: Research Square preprint supplement (doi:10.21203/rs.3.rs-9577216/v1)
Supplement: Supplementary file 3 [file 292e237fc1546bb789603222.xlsx]

## Sheet: Expression_Table
Supplementary Table 4. Transcriptome-wide gene expression across MM27, MM13 and MM16 PDX models
13,888 genes (TPM > 0 in ≥1 model)
TPM = Transcripts Per Million. log₂(TPM+1) = log₂-transformed expression. Transcriptome z-score = within-sample standardization across all genes (population SD). Raw expression data derived from sequencing data deposited in Bossi et al., Cancer Discovery (2016).
Gene	MM27 TPM	MM13 TPM	MM16 TPM	MM27 log₂(TPM+1)	MM13 log₂(TPM+1)	MM16 log₂(TPM+1)	MM27 transcriptome z	MM13 transcriptome z	MM16 transcriptome z
A1BG	7.43	3.57	24.48	3.0755	2.1922	4.6713	-0.5625	-0.8198	0.1381
A1BG-AS1	0.96	0.59	3.08	0.9709	0.669	2.0286	-1.4999	-1.4824	-1.0132
A2LD1	3.57	8.96	4.35	2.1922	3.3161	2.4195	-0.9559	-0.3309	-0.8429
A2M	61.18	0.64	280.09	5.9584	0.7137	8.1349	0.7215	-1.463	1.6469
A4GALT	17.62	0.54	0.06	4.2188	0.6229	0.0841	-0.0533	-1.5025	-1.8603
AAAS	72.25	62.72	54.1	6.1948	5.9937	5.784	0.8268	0.8339	0.6228
AACS	34.06	33.41	40.67	5.1318	5.1048	5.3809	0.3534	0.4472	0.4472
AADAT	17.96	4.93	19.74	4.2449	2.568	4.3743	-0.0416	-0.6563	0.0087
AAGAB	75.59	66.64	53.76	6.2591	6.0798	5.7751	0.8555	0.8714	0.6189
AAK1	8.94	8.63	10.55	3.3132	3.2675	3.5298	-0.4566	-0.352	-0.3592
AAMP	168.9	137.84	142.08	7.4085	7.1173	7.1607	1.3674	1.3227	1.2225
AARS	272.58	107.02	215.68	8.0958	6.7552	7.7594	1.6736	1.1651	1.4834
AARS2	44.68	31.42	24.88	5.5135	5.0188	4.6938	0.5234	0.4098	0.1479
AARSD1	30.16	18.53	33.29	4.9616	4.2876	5.0997	0.2776	0.0917	0.3247
AASDH	10.32	6.34	12.72	3.5008	2.8758	3.7782	-0.373	-0.5224	-0.251
AASDHPPT	70.05	92	84.67	6.1508	6.5392	6.4207	0.8072	1.0712	0.9002
AASS	19.33	8.44	12.5	4.3455	3.2388	3.7549	0.0032	-0.3645	-0.2611
AATF	123.58	85.23	149.96	6.9609	6.4301	7.238	1.1681	1.0237	1.2562
AATK	18.09	0.24	17.37	4.2547	0.3103	4.1993	-0.0372	-1.6385	-0.0675
ABAT	1.62	0.77	0.67	1.3896	0.8237	0.7398	-1.3134	-1.4151	-1.5746
ABCA1	5.45	29.72	5.96	2.6893	4.9411	2.7991	-0.7345	0.376	-0.6775
ABCA10	0.68	0.23	0.91	0.7485	0.2987	0.9336	-1.5989	-1.6435	-1.4902
ABCA11P	8.41	5.06	5.73	3.2342	2.5993	2.7506	-0.4918	-0.6427	-0.6986
ABCA13	1.33	0.29	0.01	1.2203	0.3674	0.0144	-1.3887	-1.6136	-1.8906
ABCA2	13.54	14.69	19.41	3.862	3.9718	4.3512	-0.2122	-0.0457	-0.0014
ABCA3	0.41	0.26	0.79	0.4957	0.3334	0.84	-1.7115	-1.6284	-1.531
ABCA5	12.03	3.03	14	3.7038	2.0108	3.9069	-0.2826	-0.8987	-0.1949
ABCA6	1.49	0.07	0.26	1.3161	0.0976	0.3334	-1.3461	-1.731	-1.7517
ABCA7	6.38	6.67	9.06	2.8836	2.9392	3.3306	-0.6479	-0.4948	-0.446
ABCA8	12.15	0.08	18.37	3.717	0.111	4.2758	-0.2767	-1.7252	-0.0342
ABCA9	4.62	0.04	1.11	2.4906	0.0566	1.0772	-0.823	-1.7488	-1.4276
ABCB1	1.12	0.16	0.98	1.0841	0.2141	0.9855	-1.4494	-1.6803	-1.4676
ABCB10	31.2	17.67	34.91	5.009	4.2227	5.1663	0.2987	0.0635	0.3537
ABCB4	13.59	0.34	9.55	3.8669	0.4222	3.3992	-0.21	-1.5898	-0.4161
ABCB5	10.69	0.18	15.41	3.5472	0.2388	4.0365	-0.3524	-1.6696	-0.1385
ABCB6	79.77	22.93	36.74	6.3357	4.5807	5.238	0.8896	0.2192	0.385
ABCB7	30.12	21.85	20.51	4.9598	4.5141	4.4269	0.2768	0.1903	0.0316
ABCB8	34.25	14.11	21.69	5.1396	3.9174	4.504	0.3568	-0.0693	0.0652
ABCB9	9.23	21.51	20.61	3.3547	4.4925	4.4336	-0.4381	0.1809	0.0345
ABCC1	35.8	40.68	41.74	5.2016	5.3813	5.4175	0.3845	0.5675	0.4632
ABCC10	17.82	24.44	44.94	4.2342	4.669	5.5217	-0.0464	0.2576	0.5085
ABCC2	3.25	6.4	34.13	2.0875	2.8875	5.1346	-1.0025	-0.5173	0.3399
ABCC3	0.19	8.67	0.92	0.251	3.2735	0.9411	-1.8205	-0.3494	-1.4869
ABCC4	20.83	11.82	24.15	4.4482	3.6803	4.6525	0.0489	-0.1725	0.1299
ABCC5	10.3	14.78	23.89	3.4983	3.98	4.6375	-0.3742	-0.0421	0.1234
ABCC9	4.13	6.22	2.64	2.359	2.852	1.8639	-0.8816	-0.5328	-1.0849
ABCD1	67.93	14.37	41.39	6.1071	3.942	5.4057	0.7878	-0.0586	0.458
ABCD2	0.23	0.18	0.2	0.2987	0.2388	0.263	-1.7993	-1.6696	-1.7823
ABCD3	41.34	43.1	83.2	5.4039	5.4627	6.3957	0.4746	0.6029	0.8893
ABCD4	25.59	28.13	27.58	4.7328	4.8644	4.8369	0.1757	0.3427	0.2102
ABCE1	92.76	56.35	100.26	6.5509	5.8417	6.6619	0.9855	0.7678	1.0053
ABCF1	19.06	15.96	30.14	4.3262	4.0841	4.9607	-0.0054	0.0032	0.2642
ABCF2	75.08	66.65	67.11	6.2494	6.08	6.0898	0.8512	0.8714	0.756
ABCF3	25.95	60.63	77.98	4.7522	5.9456	6.3034	0.1843	0.813	0.8491
ABCG2	0.94	4.99	6.03	0.9561	2.5826	2.8135	-1.5065	-0.65	-0.6712
ABCG4	0.33	0.2	1.16	0.4114	0.263	1.111	-1.749	-1.659	-1.4129
ABHD10	34.03	25.56	34.16	5.1305	4.7312	5.1359	0.3528	0.2847	0.3405
ABHD11	30.63	23.99	32.42	4.9832	4.6433	5.0626	0.2872	0.2464	0.3086
ABHD12	112.4	64.95	63.31	6.8253	6.0433	6.007	1.1077	0.8555	0.72
ABHD13	26.81	14.88	15.92	4.7975	3.9891	4.0807	0.2045	-0.0381	-0.1192
ABHD14A	17.93	12.47	23.95	4.2426	3.7517	4.641	-0.0426	-0.1414	0.1249
ABHD14B	53.28	143.72	120.68	5.7623	7.1771	6.9269	0.6342	1.3487	1.1207
ABHD15	17.9	12.71	40.54	4.2403	3.7772	5.3764	-0.0437	-0.1303	0.4453
ABHD16A	7.99	4.94	9.54	3.1683	2.5705	3.3978	-0.5211	-0.6553	-0.4167
ABHD16B	6.8	9.99	2.61	2.9635	3.4581	1.852	-0.6124	-0.2691	-1.0901
ABHD2	29.93	76.88	38.21	4.9509	6.2832	5.2931	0.2728	0.9598	0.409
ABHD3	23.17	10.78	27.07	4.5951	3.5583	4.811	0.1144	-0.2256	0.1989
ABHD4	27.53	80.16	35.7	4.8344	6.3427	5.1977	0.2209	0.9857	0.3674
ABHD5	7.78	57.6	20.57	3.1342	5.8728	4.431	-0.5363	0.7813	0.0334
ABHD6	11.36	15.81	18.65	3.6276	4.0712	4.2965	-0.3166	-0.0024	-0.0252
ABHD8	7.92	17.11	9.88	3.157	4.1787	3.4436	-0.5261	0.0444	-0.3967
ABI1	36.97	54.09	104.74	5.2468	5.7837	6.7244	0.4046	0.7426	1.0325
ABI2	48.4	25.57	30.32	5.6264	4.7317	4.969	0.5737	0.2849	0.2678
ABI3BP	0.07	0.71	0.48	0.0976	0.774	0.5656	-1.8888	-1.4368	-1.6505
ABL1	60.11	100.78	55.46	5.9333	6.6693	5.8192	0.7104	1.1278	0.6381
ABL2	32.03	53.89	102.58	5.0457	5.7785	6.6946	0.3151	0.7403	1.0195
ABLIM1	10.56	12.35	0.39	3.5311	3.7388	0.4751	-0.3596	-0.147	-1.6899
ABLIM3	13.44	38.66	103.02	3.852	5.3096	6.7007	-0.2166	0.5363	1.0222
ABR	62.74	17.47	67.16	5.9941	4.2071	6.0909	0.7375	0.0567	0.7565
ABT1	38.43	73.97	66.74	5.3012	6.2282	6.0819	0.4289	0.9359	0.7526
ABTB1	6.08	39.71	22.91	2.8237	5.3473	4.5795	-0.6746	0.5527	0.0981
ABTB2	39.44	14.36	24.86	5.3377	3.9411	4.6927	0.4451	-0.059	0.1474
ACAA1	63.14	51.88	62.26	6.0032	5.7247	5.9832	0.7415	0.7169	0.7096
ACAA2	36.08	25.73	91.35	5.2126	4.7404	6.529	0.3894	0.2887	0.9474
ACACA	48.04	25.63	58.74	5.6159	4.735	5.9006	0.569	0.2863	0.6736
ACACB	6.15	1.88	5.67	2.8379	1.5261	2.7377	-0.6683	-1.1096	-0.7043
ACAD10	20.07	14.31	26.98	4.3971	3.9364	4.8063	0.0262	-0.0611	0.1969
ACAD11	1.61	2.68	2.6	1.384	1.8797	1.848	-1.3158	-0.9558	-1.0918
ACAD8	21.91	15.79	32.6	4.5179	4.0695	5.0704	0.08	-0.0031	0.3119
ACAD9	37.58	29.19	30.28	5.2698	4.916	4.9672	0.4149	0.3651	0.267
ACADM	45.48	38.14	78.31	5.5385	5.2906	6.3094	0.5346	0.528	0.8517
ACADS	31.83	15.94	17.33	5.0369	4.0824	4.1961	0.3111	0.0024	-0.0689
ACADSB	17.66	11.56	7.36	4.2219	3.6508	3.0635	-0.0519	-0.1853	-0.5623
ACADVL	288.89	65.9	115.78	8.1794	6.0639	6.8676	1.7108	0.8645	1.0949
ACAP2	28.76	25.85	33.53	4.8953	4.7469	5.1098	0.2481	0.2915	0.3291
ACAP3	55.42	20	72.31	5.8181	4.3923	6.1959	0.6591	0.1373	0.8023
ACAT1	106	38.71	67.59	6.7415	5.3114	6.0999	1.0703	0.5371	0.7604
ACAT2	263.23	135.54	30.58	8.0457	7.0932	4.9809	1.6512	1.3122	0.273
ACBD3	59.88	46.14	112.47	5.9279	5.5589	6.8262	0.708	0.6447	1.0768
ACBD4	6.67	6.51	9.62	2.9392	2.9088	3.4087	-0.6232	-0.5081	-0.4119
ACBD5	24.87	22.77	44.85	4.6932	4.5711	5.5188	0.1581	0.215	0.5073
ACBD6	87.23	60.87	94.45	6.4632	5.9512	6.5767	0.9464	0.8154	0.9681
ACBD7	1.17	0.69	0.22	1.1177	0.757	0.2869	-1.4345	-1.4441	-1.7719
ACCN2	10.94	5.56	17.43	3.5777	2.7137	4.204	-0.3388	-0.593	-0.0655
ACCN3	1.78	2.43	3.78	1.4751	1.7782	2.257	-1.2753	-0.9999	-0.9137
ACCN4	3.4	0.09	0.68	2.1375	0.1243	0.7485	-0.9802	-1.7194	-1.5708
ACCS	11.1	6.41	8.17	3.5969	2.8895	3.1969	-0.3302	-0.5165	-0.5042
ACD	21.28	30.07	27.64	4.4777	4.9575	4.84	0.0621	0.3831	0.2116
ACER2	0.6	7.26	0.8	0.6781	3.0461	0.848	-1.6303	-0.4483	-1.5275
ACER3	28.34	25.21	19.93	4.8748	4.712	4.3875	0.2389	0.2764	0.0145
ACHE	1.81	0.25	0.49	1.4906	0.3219	0.5753	-1.2684	-1.6334	-1.6463
ACIN1	99.04	73.18	107.79	6.6444	6.213	6.7654	1.0271	0.9293	1.0503
ACLY	341.33	153.23	511.73	8.4192	7.2689	9.0021	1.8176	1.3886	2.0247
ACN9	28.44	12.22	20.15	4.8797	3.7247	4.4026	0.2411	-0.1532	0.021
ACO1	46.37	87.38	25.25	5.5659	6.4656	4.7142	0.5467	1.0392	0.1568
ACO2	211.87	57.74	123.06	7.7338	5.8763	6.9549	1.5123	0.7828	1.1329
ACOT1	3.37	9.26	12.62	2.1276	3.359	3.7677	-0.9846	-0.3123	-0.2556
ACOT11	3.82	0.24	2.15	2.269	0.3103	1.6554	-0.9217	-1.6385	-1.1758
ACOT13	21.73	28.8	24.84	4.5065	4.8972	4.6915	0.0749	0.3569	0.1469
ACOT2	22.11	20.32	29.53	4.5304	4.4141	4.9322	0.0856	0.1468	0.2517
ACOT4	0.37	5.04	1.71	0.4542	2.5945	1.4383	-1.73	-0.6448	-1.2703
ACOT7	213.96	68.37	80.02	7.7479	6.1162	6.3402	1.5186	0.8872	0.8651
ACOT8	31.79	33.52	30.38	5.0352	5.1094	4.9718	0.3104	0.4492	0.269
ACOT9	94.53	159.18	70.81	6.5779	7.3236	6.1661	0.9975	1.4124	0.7893
ACOX1	15.4	10.68	23.56	4.0356	3.546	4.6182	-0.1348	-0.2309	0.115
ACOX2	0.89	3.66	6.46	0.9184	2.2203	2.8992	-1.5232	-0.8076	-0.6339
ACOX3	13.37	9.28	18.51	3.845	3.3618	4.2861	-0.2197	-0.311	-0.0297
ACP1	130.19	117.32	110.31	7.0355	6.8866	6.7984	1.2013	1.2223	1.0647
ACP2	44.38	27.43	50.62	5.504	4.8293	5.6899	0.5192	0.3274	0.5818
ACP5	136.66	2.52	71.15	7.105	1.8156	6.1729	1.2322	-0.9837	0.7922
ACP6	36.92	15.84	21.29	5.2449	4.0738	4.4783	0.4038	-0.0013	0.054
ACPL2	8.48	12.91	9.11	3.2449	3.7981	3.3377	-0.487	-0.1212	-0.4429
ACPP	0.08	0.56	1.89	0.111	0.6415	1.5311	-1.8828	-1.4944	-1.2299
ACRC	1.12	1.12	0.92	1.0841	1.0841	0.9411	-1.4494	-1.3019	-1.4869
ACSBG1	27.75	0.32	2.07	4.8455	0.4005	1.6182	0.2259	-1.5992	-1.1919
ACSF2	10.16	9.15	16.83	3.4803	3.3434	4.1562	-0.3822	-0.319	-0.0863
ACSF3	14.2	11.92	15.39	3.926	3.6915	4.0347	-0.1837	-0.1676	-0.1392
ACSL1	97.41	26.52	35.34	6.6207	4.7824	5.1835	1.0166	0.307	0.3612
ACSL3	672.09	120.83	152.84	9.3947	6.9287	7.2653	2.252	1.2407	1.2681
ACSL4	153.03	101.36	62.74	7.2671	6.6775	5.9941	1.3044	1.1314	0.7144
ACSL5	1.49	1.29	0.25	1.3161	1.1953	0.3219	-1.3461	-1.2535	-1.7567
ACSS1	40.46	0.25	65.26	5.3736	0.3219	6.0501	0.4611	-1.6334	0.7387
ACSS2	53.83	59.73	27	5.7769	5.9243	4.8074	0.6407	0.8037	0.1974
ACSS3	0.13	13.74	0.33	0.1763	3.8817	0.4114	-1.8537	-0.0849	-1.7177
ACTA2	29.31	63.18	77.31	4.9217	6.0041	6.2911	0.2598	0.8384	0.8437
ACTB	7634.31	8030.3	4953.88	12.8985	12.9714	12.2746	3.8126	3.8693	3.4504
ACTG1	6132.93	3349.13	5110.84	12.5826	11.71	12.3196	3.6719	3.3206	3.47
ACTG2	1.57	29.5	3.09	1.3618	4.9307	2.0321	-1.3257	0.3715	-1.0116
ACTL10	0.76	1.77	3.4	0.8156	1.4699	2.1375	-1.569	-1.134	-0.9657
ACTL6A	70.94	100.94	99.38	6.1687	6.6716	6.6493	0.8152	1.1288	0.9998
ACTL8	1.1	0.06	0.32	1.0704	0.0841	0.4005	-1.4555	-1.7369	-1.7224
ACTN1	125.97	446.42	274.22	6.9883	8.8055	8.1044	1.1803	2.0571	1.6337
ACTN2	0.04	0.36	0.14	0.0566	0.4436	0.189	-1.9071	-1.5805	-1.8146
ACTN4	615.17	729.98	262.51	9.2672	9.5137	8.0417	2.1953	2.3652	1.6064
ACTR10	55.58	68.35	87	5.8222	6.1158	6.4594	0.6609	0.887	0.9171
ACTR1A	102.64	160.23	102.95	6.6954	7.333	6.6997	1.0498	1.4165	1.0217
ACTR1B	47.06	87.18	19.7	5.5868	6.4624	4.3716	0.556	1.0378	0.0075
ACTR2	307.9	275.86	312.2	8.271	8.113	8.2909	1.7516	1.7558	1.7149
ACTR3	226.61	296.23	332.93	7.8304	8.2154	8.3834	1.5553	1.8004	1.7552
ACTR3B	10.83	10.25	4.39	3.5644	3.4919	2.4303	-0.3447	-0.2544	-0.8382
ACTR5	14.56	9.49	12.2	3.9598	3.3909	3.7225	-0.1686	-0.2983	-0.2753
ACTR6	48.47	21.88	32.33	5.6285	4.516	5.0587	0.5746	0.1911	0.3069
ACTR8	20.81	17.54	31.01	4.4469	4.2126	5.0005	0.0484	0.0591	0.2815
ACVR1	59.94	43.98	90.14	5.9293	5.4912	6.51	0.7086	0.6153	0.9391
ACVR1B	22.98	15.73	24.91	4.5838	4.0644	4.6954	0.1093	-0.0054	0.1486
ACVR1C	2.59	0.33	5.32	1.844	0.4114	2.6599	-1.111	-1.5945	-0.7381
ACVR2A	3.61	4.66	8.18	2.2048	2.5008	3.1985	-0.9503	-0.6856	-0.5035
ACVR2B	2.38	2.68	4.53	1.757	1.8797	2.4673	-1.1497	-0.9558	-0.8221
ACVRL1	1.87	0.03	10.11	1.5211	0.0426	3.4738	-1.2548	-1.7549	-0.3836
ACY1	6.34	4.95	5.77	2.8758	2.5729	2.7592	-0.6514	-0.6542	-0.6949
ACYP1	37.75	10.66	26.9	5.2761	3.5435	4.8022	0.4177	-0.232	0.1951
ACYP2	4.44	3.72	8.62	2.4436	2.2388	3.266	-0.8439	-0.7995	-0.4741
ADA	42.32	6.82	34.44	5.437	2.9672	5.1473	0.4893	-0.4827	0.3454
ADAL	15.41	11.21	8.03	4.0365	3.61	3.1747	-0.1344	-0.2031	-0.5139
ADAM1	4.44	1.77	3.13	2.4436	1.4699	2.0461	-0.8439	-1.134	-1.0055
ADAM10	139.72	59.44	133.72	7.1367	5.9174	7.0738	1.2464	0.8007	1.1847
ADAM11	4.08	0.68	2.02	2.3448	0.7485	1.5945	-0.8879	-1.4479	-1.2023
ADAM12	0.66	15.69	2.81	0.7312	4.0609	1.9298	-1.6066	-0.0069	-1.0562
ADAM15	148.94	94.64	150	7.2282	6.5795	7.2384	1.2871	1.0888	1.2564
ADAM17	79.05	33.89	56.66	6.3228	5.1247	5.8495	0.8839	0.4559	0.6513
ADAM19	15.64	84.41	36.64	4.0566	6.4163	5.2342	-0.1255	1.0178	0.3833
ADAM22	1.08	0.24	2.64	1.0566	0.3103	1.8639	-1.4617	-1.6385	-1.0849
ADAM23	79.67	11.32	169.59	6.334	3.6229	7.4144	0.8888	-0.1974	1.3331
ADAM32	0.39	0.56	0.11	0.4751	0.6415	0.1506	-1.7207	-1.4944	-1.8313
ADAM8	0.35	39.27	0.17	0.433	5.3316	0.2265	-1.7394	0.5459	-1.7982
ADAM9	188.43	164.4	330.66	7.5655	7.3698	8.3736	1.4374	1.4325	1.7509
ADAMTS1	35.56	199.92	67.26	5.1922	7.6505	6.093	0.3803	1.5546	0.7574
ADAMTS13	1.19	2.69	4.46	1.1309	1.8836	2.4489	-1.4286	-0.9541	-0.8301
ADAMTS14	0.3	4.6	0.73	0.3785	2.4854	0.7908	-1.7637	-0.6923	-1.5524
ADAMTS15	7.92	0.33	2.52	3.157	0.4114	1.8156	-0.5261	-1.5945	-1.106
ADAMTS16	0.14	1.03	0.19	0.189	1.0215	0.251	-1.8481	-1.3291	-1.7876
ADAMTS17	2.79	0.49	3.56	1.9222	0.5753	2.189	-1.0761	-1.5232	-0.9433
ADAMTS3	0.57	0.38	8.54	0.6508	0.4647	3.254	-1.6424	-1.5713	-0.4793
ADAMTS4	20.64	0.29	42.29	4.4356	0.3674	5.436	0.0433	-1.6136	0.4712
ADAMTS5	0.05	0.42	0.48	0.0704	0.5059	0.5656	-1.9009	-1.5534	-1.6505
ADAMTS6	2.08	8.78	0.75	1.6229	3.2898	0.8074	-1.2094	-0.3423	-1.5452
ADAMTS7	31.33	18.9	17.13	5.0148	4.3147	4.1803	0.3013	0.1035	-0.0758
ADAMTS9	6.01	0.07	4.02	2.8094	0.0976	2.3277	-0.681	-1.731	-0.8829
ADAMTSL1	0.21	37.99	0.18	0.275	5.285	0.2388	-1.8098	0.5256	-1.7929
ADAMTSL4	4.63	18.8	4.11	2.4931	4.3074	2.3533	-0.8218	0.1003	-0.8717
ADAMTSL5	0.63	17.64	3.83	0.7049	4.2203	2.272	-1.6183	0.0625	-0.9071
ADAP1	11.1	0.8	18.14	3.5969	0.848	4.2585	-0.3302	-1.4046	-0.0417
ADAR	125.98	87.33	167.04	6.9885	6.4648	7.3927	1.1803	1.0388	1.3236
ADARB1	29.62	2.92	9.7	4.9364	1.9709	3.4195	0.2664	-0.9161	-0.4072
ADAT1	24.38	15.52	24.41	4.6656	4.0461	4.6673	0.1458	-0.0133	0.1364
ADAT2	6.09	4.4	2.7	2.8258	2.433	1.8875	-0.6737	-0.7151	-1.0746
ADAT3	4.81	2.25	5.88	2.5385	1.7004	2.7824	-0.8016	-1.0337	-0.6848
ADC	9.33	2.93	6.93	3.3688	1.9745	2.9873	-0.4318	-0.9145	-0.5955
ADCK1	12.03	7.7	13.34	3.7038	3.121	3.842	-0.2826	-0.4158	-0.2232
ADCK2	26.57	27.14	30.33	4.785	4.8146	4.9695	0.1989	0.321	0.268
ADCK3	17.98	13.12	44.33	4.2464	3.8197	5.5024	-0.041	-0.1118	0.5001
ADCK4	36.44	11.32	20.01	5.2265	3.6229	4.393	0.3956	-0.1974	0.0168
ADCK5	9.96	13.82	29.38	3.4542	3.8895	4.925	-0.3938	-0.0815	0.2486
ADCY1	44.17	0.69	1.62	5.4973	0.757	1.3896	0.5162	-1.4441	-1.2916
ADCY3	38.25	15.84	49	5.2946	4.0738	5.6439	0.4259	-0.0013	0.5618
ADCY6	30.57	19.6	62.45	4.9805	4.3646	5.9875	0.286	0.1252	0.7115
ADCY7	9.36	32.37	18.57	3.373	5.0605	4.2906	-0.43	0.4279	-0.0278
ADCY9	26.4	8.06	32.54	4.7761	3.1795	5.0678	0.195	-0.3903	0.3108
ADD1	165.87	146.8	244.57	7.3826	7.2075	7.94	1.3559	1.3619	1.562
ADD2	9.27	0.11	0.27	3.3604	0.1506	0.3448	-0.4356	-1.708	-1.7467
ADD3	149.43	21.05	107.02	7.2329	4.4627	6.7552	1.2892	0.1679	1.0459
ADH5	112.62	91.24	196.77	6.8281	6.5273	7.6277	1.1089	1.066	1.426
ADHFE1	2.03	6.57	5.98	1.5993	2.9203	2.8032	-1.2199	-0.5031	-0.6757
ADI1	127.41	89.11	163.1	7.0046	6.4936	7.3584	1.1875	1.0514	1.3087
ADIPOR1	201.42	116.49	211.28	7.6612	6.8764	7.7298	1.48	1.2179	1.4705
ADIPOR2	151.28	60.9	106.19	7.2506	5.9519	6.744	1.2971	0.8157	1.041
ADK	17.34	87.64	17.28	4.1969	6.4699	4.1922	-0.063	1.041	-0.0706
ADM	1.81	26.53	70.98	1.4906	4.7829	6.1695	-1.2684	0.3072	0.7908
ADM2	1.24	0.18	4.79	1.1635	0.2388	2.5336	-1.4141	-1.6696	-0.7932
ADNP	84.7	68.06	87.4	6.4212	6.1098	6.466	0.9277	0.8844	0.9199
ADNP2	23.91	24.64	14.59	4.6387	4.6803	3.9625	0.1338	0.2626	-0.1707
ADO	45.7	55.08	22.56	5.5454	5.8094	4.5583	0.5376	0.7537	0.0888
ADORA1	0.38	2.1	1.08	0.4647	1.6323	1.0566	-1.7253	-1.0634	-1.4366
ADORA2A	1.81	0.33	0.31	1.4906	0.4114	0.3896	-1.2684	-1.5945	-1.7272
ADORA2B	4.56	30.23	1.76	2.4751	4.9649	1.4647	-0.8299	0.3863	-1.2588
ADPGK	58.26	75.32	64.37	5.889	6.254	6.0306	0.6906	0.9471	0.7302
ADPRH	4.39	5.81	17.94	2.4303	2.7677	4.2434	-0.8498	-0.5695	-0.0483
ADPRHL1	1.25	2.12	0.74	1.1699	1.6415	0.7991	-1.4112	-1.0594	-1.5488
ADPRHL2	50.97	22.17	33.21	5.6996	4.5342	5.0963	0.6063	0.199	0.3232
ADRA1B	0.91	5.03	0.19	0.9336	2.5922	0.251	-1.5165	-0.6458	-1.7876
ADRA2A	5.11	0.02	1.32	2.6112	0.0286	1.2141	-0.7693	-1.761	-1.368
ADRA2C	15.59	0.43	14.54	4.0522	0.516	3.9579	-0.1274	-1.549	-0.1727
ADRB2	0.43	30.39	3.98	0.516	4.9722	2.3161	-1.7024	0.3895	-0.8879
ADRBK1	39.13	71.02	41.5	5.3266	6.1703	5.4094	0.4402	0.9107	0.4596
ADRBK2	7.53	0.12	24.5	3.0925	0.1635	4.6724	-0.5549	-1.7023	0.1386
ADRM1	298.18	188.33	223.05	8.2249	7.5648	7.8077	1.731	1.5173	1.5044
ADSL	216.54	129.53	111.94	7.7651	7.0282	6.8194	1.5263	1.2839	1.0739
ADSS	104.19	57.26	124.6	6.7169	5.8644	6.9727	1.0594	0.7777	1.1407
ADSSL1	8.18	4.13	29.39	3.1985	2.359	4.9255	-0.5077	-0.7473	0.2488
ADTRP	0.19	82.28	1.41	0.251	6.3799	1.269	-1.8205	1.0019	-1.3441
AEBP1	387.63	88.5	807.77	8.6023	6.4838	9.6596	1.8991	1.0471	2.3112
AEBP2	24.67	15.79	19.64	4.682	4.0695	4.3674	0.1531	-0.0031	0.0057
AEN	92.34	145.15	76.94	6.5444	7.1913	6.2843	0.9826	1.3549	0.8408
AES	240.62	295	342.63	7.9166	8.2095	8.4247	1.5937	1.7978	1.7732
AFAP1	25.04	54.06	31.8	4.7027	5.7829	5.0356	0.1623	0.7422	0.2968
AFAP1L1	23.2	22.62	80.21	4.5969	4.5619	6.3436	0.1152	0.2111	0.8666
AFAP1L2	73.1	6.68	3.33	6.2114	2.9411	2.1144	0.8342	-0.494	-0.9758
AFF1	29.65	12.65	24.7	4.9378	3.7708	4.6837	0.267	-0.1331	0.1435
AFF2	0	0.18	0.79	0	0.2388	0.84	-1.9323	-1.6696	-1.531
AFF3	9.43	11.41	0.24	3.3827	3.6334	0.3103	-0.4257	-0.1929	-1.7617
AFF4	54.79	47.57	73.88	5.8019	5.602	6.2265	0.6519	0.6635	0.8156
AFG3L1P	15.69	9.36	10.19	4.0609	3.373	3.4841	-0.1236	-0.3062	-0.3791
AFG3L2	127.44	82.44	155.48	7.005	6.3827	7.2898	1.1877	1.0031	1.2788
AFMID	23.24	5.23	32.69	4.5993	2.6392	5.0742	0.1162	-0.6253	0.3136
AFTPH	25.4	25.2	21.47	4.7225	4.7115	4.4899	0.1711	0.2761	0.0591
AGA	56.29	19.93	32.07	5.8402	4.3875	5.0475	0.6689	0.1352	0.3019
AGAP1	22	12.04	21.59	4.5236	3.7049	4.4976	0.0825	-0.1618	0.0624
AGAP11	0.51	0.47	0.59	0.5945	0.5558	0.669	-1.6675	-1.5317	-1.6055
AGAP2	0.22	0.07	0.17	0.2869	0.0976	0.2265	-1.8045	-1.731	-1.7982
AGAP3	80.72	36.12	81.15	6.3526	5.2141	6.3602	0.8971	0.4948	0.8738
AGAP4	0.81	1.13	0.74	0.856	1.0909	0.7991	-1.551	-1.2989	-1.5488
AGAP5	1.53	3.25	1.53	1.3391	2.0875	1.3391	-1.3358	-0.8654	-1.3135
AGAP6	10.08	8.15	2.9	3.4699	3.1938	1.9635	-0.3868	-0.3841	-1.0415
AGAP8	0.4	1.27	0.13	0.4854	1.1827	0.1763	-1.7161	-1.259	-1.8201
AGBL2	0.31	0.49	0.54	0.3896	0.5753	0.6229	-1.7588	-1.5232	-1.6255
AGBL3	0.27	0.29	0.49	0.3448	0.3674	0.5753	-1.7787	-1.6136	-1.6463
AGBL5	36.27	36.19	24.31	5.2199	5.2168	4.6616	0.3927	0.496	0.1339
AGER	0.59	1.33	0.58	0.669	1.2203	0.6599	-1.6343	-1.2426	-1.6094
AGFG1	66.88	31.76	34.01	6.0849	5.0339	5.1297	0.7779	0.4164	0.3378
AGFG2	13.53	10.67	17.43	3.861	3.5447	4.204	-0.2126	-0.2314	-0.0655
AGGF1	25.82	27.1	43.35	4.7452	4.8125	5.4709	0.1812	0.3201	0.4864
AGK	53.73	22.88	32.11	5.7743	4.5777	5.0492	0.6395	0.2179	0.3027
AGL	14.26	8.18	17.32	3.9317	3.1985	4.1953	-0.1811	-0.3821	-0.0693
AGMAT	0.82	1.53	0.34	0.8639	1.3391	0.4222	-1.5475	-1.1909	-1.713
AGMO	4.29	0.07	18.46	2.4033	0.0976	4.2824	-0.8619	-1.731	-0.0313
AGPAT1	35.7	19.91	43.1	5.1977	4.3861	5.4627	0.3828	0.1346	0.4828
AGPAT2	47.25	112.15	79.74	5.5925	6.8221	6.3352	0.5586	1.1943	0.8629
AGPAT3	49.41	44.36	57.79	5.6556	5.5033	5.8775	0.5867	0.6206	0.6635
AGPAT4	5.37	3.95	0.08	2.6713	2.3074	0.111	-0.7425	-0.7697	-1.8485
AGPAT5	33.9	28.2	68.8	5.1252	4.8679	6.1252	0.3504	0.3442	0.7714
AGPAT6	96.52	46.58	433.03	6.6076	5.5723	8.7617	1.0107	0.6506	1.92
AGPAT9	29.96	24.01	1.74	4.9523	4.6444	1.4542	0.2735	0.2469	-1.2634
AGPHD1	7.46	7.61	7	3.0807	3.106	3	-0.5602	-0.4223	-0.59
AGPS	74.15	33.65	30.96	6.2317	5.1148	4.9982	0.8433	0.4516	0.2805
AGRN	62	66.17	73.61	5.9773	6.0697	6.2213	0.73	0.867	0.8133
AGT	27.54	5.02	26.45	4.8349	2.5898	4.7787	0.2212	-0.6469	0.1849
AGTPBP1	12.76	37.6	8.05	3.7824	5.2705	3.1779	-0.2476	0.5193	-0.5125
AGTRAP	75.28	49.12	82.03	6.2532	5.6473	6.3756	0.8529	0.6832	0.8805
AGXT2L2	10.05	9.59	11.32	3.466	3.4046	3.6229	-0.3885	-0.2924	-0.3186
AHCTF1	41.47	33.02	45.51	5.4084	5.0883	5.5395	0.4766	0.44	0.5163
AHCY	220.72	106.67	127.61	7.7926	6.7505	7.0069	1.5385	1.1631	1.1555
AHCYL1	46.04	59.79	84.31	5.5558	5.9258	6.4146	0.5423	0.8043	0.8975
AHCYL2	31.08	8.57	53.26	5.0036	3.2585	5.7618	0.2963	-0.3559	0.6132
AHDC1	17.02	8.22	18.78	4.1715	3.2048	4.306	-0.0743	-0.3793	-0.0211
AHI1	13.89	9.02	3.72	3.8963	3.3248	2.2388	-0.1969	-0.3271	-0.9216
AHNAK	37.43	127.15	67.69	5.2642	7.0017	6.102	0.4124	1.2724	0.7614
AHNAK2	2.01	127.42	1.83	1.5898	7.0047	1.5008	-1.2242	1.2737	-1.2431
AHR	62.3	41.58	38.5	5.9841	5.4121	5.3038	0.733	0.5809	0.4136
AHRR	10.27	5.72	45.29	3.4944	2.7485	5.5326	-0.3759	-0.5778	0.5133
AHSA1	217.99	215.64	209.62	7.7747	7.7592	7.7185	1.5305	1.6019	1.4656
AHSA2	24.93	24.85	20.79	4.6966	4.6921	4.4456	0.1595	0.2677	0.0398
AIDA	79.73	130.61	111.24	6.335	7.0401	6.8104	0.8893	1.2891	1.07
AIF1L	55.25	1.18	25.79	5.8138	1.1243	4.7436	0.6571	-1.2844	0.1696
AIFM1	109.04	41.41	71.98	6.7819	5.4063	6.1894	1.0883	0.5784	0.7994
AIFM2	29.56	18.73	18.9	4.9336	4.3023	4.3147	0.2651	0.0981	-0.0173
AIFM3	1.27	0.73	1.45	1.1827	0.7908	1.2928	-1.4055	-1.4295	-1.3337
AIG1	16.12	19.6	14.35	4.0976	4.3646	3.9402	-0.1072	0.1252	-0.1804
AIM1	0.33	2.05	0.25	0.4114	1.6088	0.3219	-1.749	-1.0736	-1.7567
AIM2	0.88	48.33	0.59	0.9107	5.6244	0.669	-1.5266	0.6732	-1.6055
AIMP1	49.75	28.55	48.7	5.6653	4.8851	5.6352	0.591	0.3516	0.558
AIMP2	78.29	66.44	49.29	6.3091	6.0755	5.6522	0.8777	0.8695	0.5654
AIP	73.24	75.18	124.2	6.2141	6.2513	6.9681	0.8355	0.946	1.1386
AJUBA	5.33	81.45	20.7	2.6622	6.3654	4.4396	-0.7465	0.9956	0.0372
AK1	40.64	161.57	35.04	5.3799	7.3449	5.1715	0.4639	1.4217	0.356
AK2	129.26	28.53	92.48	7.0253	4.8841	6.5466	1.1967	0.3512	0.955
AK3	50.84	39.87	26.68	5.696	5.353	4.7908	0.6047	0.5552	0.1901
AK4	6.31	29.19	7.77	2.8699	4.916	3.1326	-0.6541	0.3651	-0.5322
AK5	0.93	10.63	3.68	0.9486	3.5398	2.2265	-1.5098	-0.2336	-0.927
AK8	0.56	1.05	0.32	0.6415	1.0356	0.4005	-1.6465	-1.3229	-1.7224
AKAP1	47.11	26.73	70.6	5.5883	4.7934	6.1619	0.5567	0.3117	0.7874
AKAP10	35.64	22.08	14.83	5.1953	4.5286	3.9846	0.3817	0.1965	-0.1611
AKAP11	23.77	21.81	15.6	4.6305	4.5116	4.0531	0.1301	0.1892	-0.1312
AKAP12	113.33	175.37	85.29	6.8371	7.4625	6.4311	1.1129	1.4728	0.9047
AKAP13	13.56	25.1	11.38	3.8639	4.706	3.6299	-0.2113	0.2737	-0.3156
AKAP2	0.29	2.64	0.17	0.3674	1.8639	0.2265	-1.7686	-0.9626	-1.7982
AKAP3	0.4	0.29	1.75	0.4854	0.3674	1.4594	-1.7161	-1.6136	-1.2611
AKAP5	0.64	0.63	0.66	0.7137	0.7049	0.7312	-1.6144	-1.4668	-1.5784
AKAP6	5.7	0.87	21.23	2.7442	0.903	4.4744	-0.71	-1.3806	0.0523
AKAP7	11.73	3.47	3.58	3.6702	2.1603	2.1953	-0.2976	-0.8337	-0.9405
AKAP8	28.1	25.26	43.43	4.8629	4.7148	5.4735	0.2337	0.2776	0.4875
AKAP8L	55.53	52.11	95.16	5.8209	5.7309	6.5874	0.6603	0.7196	0.9728
AKAP9	20.26	11.14	11.47	4.4101	3.6017	3.6404	0.0319	-0.2067	-0.311
AKD1	2.39	1.62	0.65	1.7613	1.3896	0.7225	-1.1478	-1.169	-1.5822
AKIP1	28.21	53.31	58.88	4.8684	5.7631	5.904	0.2361	0.7336	0.6751
AKIRIN1	79.6	29.82	94.75	6.3327	4.9458	6.5812	0.8883	0.378	0.9701
AKIRIN2	81.46	65.5	33.05	6.3656	6.0553	5.0896	0.9029	0.8607	0.3203
AKIRIN2-AS1	4.48	4.63	1.45	2.4542	2.4931	1.2928	-0.8392	-0.6889	-1.3337
AKNA	4.67	8.18	5.1	2.5033	3.1985	2.6088	-0.8173	-0.3821	-0.7604
AKR1A1	67.66	191.14	36.28	6.1014	7.586	5.2203	0.7852	1.5266	0.3773
AKR1B1	245.95	249.14	175.07	7.9481	7.9666	7.46	1.6077	1.6921	1.3529
AKR1B10	1.32	0.33	1.12	1.2141	0.4114	1.0841	-1.3915	-1.5945	-1.4246
AKR1C1	0.08	2.83	1.52	0.111	1.9373	1.3334	-1.8828	-0.9307	-1.316
AKR1C3	0.07	17.68	0.88	0.0976	4.2234	0.9107	-1.8888	0.0638	-1.5002
AKR1E2	0.15	3.57	4.96	0.2016	2.1922	2.5753	-1.8425	-0.8198	-0.775
AKR7A2	64.88	26.5	48.36	6.0418	4.7814	5.6253	0.7587	0.3065	0.5537
AKR7A3	0.95	0.53	0.79	0.9635	0.6135	0.84	-1.5031	-1.5066	-1.531
AKT1	174.54	119.51	303.75	7.4557	6.913	8.2515	1.3884	1.2338	1.6977
AKT1S1	75.96	67.47	71.37	6.266	6.0974	6.1773	0.8586	0.879	0.7942
AKT2	72.36	45.42	65.69	6.1969	5.5367	6.0594	0.8278	0.6351	0.7428
AKT3	63.55	23.91	76.02	6.0123	4.6387	6.2672	0.7456	0.2444	0.8333
AKTIP	21.5	16.56	17.36	4.4919	4.1342	4.1985	0.0684	0.025	-0.0679
ALAD	39.27	68.85	36.79	5.3316	6.1262	5.2399	0.4424	0.8915	0.3858
ALAS1	69.22	68.19	63.31	6.1338	6.1125	6.007	0.7997	0.8856	0.72
ALCAM	22.04	81	136.24	4.5261	6.3576	7.1006	0.0836	0.9922	1.1964
ALDH16A1	19.28	17.18	17.44	4.342	4.1843	4.2048	0.0016	0.0468	-0.0652
ALDH18A1	58.13	41.87	37.53	5.8858	5.4219	5.2679	0.6892	0.5852	0.398
ALDH1A1	246.12	1.11	132.55	7.9491	1.0772	7.0612	1.6082	-1.3048	1.1792
ALDH1A3	28.14	171.15	79.74	4.8649	7.4275	6.3352	0.2345	1.4576	0.8629
ALDH1B1	103.74	17.1	9.83	6.7107	4.1779	3.437	1.0566	0.044	-0.3996
ALDH1L2	0.39	0.79	14.33	0.4751	0.84	3.9383	-1.7207	-1.4081	-0.1812
ALDH2	53.33	0.36	29.17	5.7637	0.4436	4.915	0.6348	-1.5805	0.2443
ALDH3A2	90.76	54.93	9.56	6.5198	5.8056	3.4005	0.9716	0.7521	-0.4155
ALDH3B1	7.68	124.5	15.31	3.1177	6.9715	4.0277	-0.5437	1.2593	-0.1423
ALDH4A1	36.92	8.66	20.72	5.2449	3.272	4.441	0.4038	-0.3501	0.0377
ALDH5A1	11.69	4.54	9.54	3.6656	2.4699	3.3978	-0.2996	-0.699	-0.4167
ALDH6A1	16.61	11.47	11.15	4.1383	3.6404	3.6029	-0.0891	-0.1898	-0.3274
ALDH7A1	20.66	24.59	53.5	4.437	4.6775	5.7682	0.0439	0.2613	0.6159
ALDH9A1	105.58	84.26	87.22	6.7358	6.4138	6.463	1.0678	1.0166	0.9186
ALDOA	1457.6	871.25	1204.48	10.5104	9.7686	10.2354	2.749	2.476	2.562
ALDOC	107.6	1.1	13.71	6.7629	1.0704	3.8787	1.0799	-1.3078	-0.2072
ALG1	19.2	12.9	23.41	4.3363	3.797	4.6094	-0.0009	-0.1217	0.1111
ALG10	5.74	5.78	5.06	2.7527	2.7613	2.5993	-0.7062	-0.5723	-0.7645
ALG10B	9.35	4.37	4.89	3.3716	2.4249	2.5583	-0.4306	-0.7186	-0.7824
ALG11	16.16	7.3	13	4.101	3.0531	3.8074	-0.1057	-0.4453	-0.2383
ALG12	54.6	17.66	44.1	5.797	4.2219	5.4951	0.6497	0.0631	0.4969
ALG13	16	11.05	11.53	4.0875	3.591	3.6473	-0.1117	-0.2113	-0.308
ALG14	23.76	19.37	25.13	4.6299	4.3484	4.7076	0.1299	0.1182	0.1539
ALG2	29.17	85.73	26.03	4.915	6.4385	4.7565	0.2569	1.0274	0.1752
ALG3	69.14	74.95	100.19	6.1322	6.247	6.6609	0.799	0.9441	1.0048
ALG5	133.56	56.6	90.51	7.0721	5.848	6.5159	1.2176	0.7705	0.9416
ALG6	29.64	9.65	32.8	4.9373	3.4128	5.079	0.2668	-0.2888	0.3157
ALG8	71.79	58.31	91.32	6.1857	5.8902	6.5286	0.8228	0.7889	0.9472
ALG9	11.19	6.41	15.98	3.6076	2.8895	4.0858	-0.3255	-0.5165	-0.117
ALK	1.83	0.21	0.33	1.5008	0.275	0.4114	-1.2638	-1.6538	-1.7177
ALKBH1	12.44	11.06	11.61	3.7485	3.5922	3.6565	-0.2627	-0.2108	-0.304
ALKBH2	32.58	19.37	47.09	5.0695	4.3484	5.5877	0.3257	0.1182	0.5373
ALKBH3	34.87	40.06	42.45	5.1647	5.3597	5.4413	0.3681	0.5581	0.4735
ALKBH4	15.83	10.85	16.84	4.073	3.5668	4.157	-0.1182	-0.2218	-0.0859
ALKBH5	88.27	70.82	57.04	6.4801	6.1663	5.859	0.9539	0.909	0.6555
ALKBH6	29.44	26.12	22.49	4.9279	4.7613	4.554	0.2626	0.2978	0.087
ALKBH7	35.07	47.15	60.78	5.1727	5.5895	5.9491	0.3716	0.6581	0.6947
ALKBH8	6.18	8.91	13.87	2.844	3.3089	3.8943	-0.6656	-0.334	-0.2004
ALMS1	7.8	5.22	5.2	3.1375	2.6369	2.6323	-0.5348	-0.6264	-0.7502
ALOX12	0.52	0.76	0.39	0.6041	0.8156	0.4751	-1.6632	-1.4187	-1.6899
ALPK1	3.39	2.27	6.38	2.1342	1.7093	2.8836	-0.9817	-1.0299	-0.6407
ALPK3	0.64	0.47	0.27	0.7137	0.5558	0.3448	-1.6144	-1.5317	-1.7467
ALPL	2.52	0.18	2.38	1.8156	0.2388	1.757	-1.1236	-1.6696	-1.1315
ALS2	26.88	29.19	20.97	4.8012	4.916	4.4575	0.2061	0.3651	0.0449
ALS2CL	0.27	28.62	3.23	0.3448	4.8885	2.0807	-1.7787	0.3531	-0.9905
ALS2CR11	0.5	0.33	2.66	0.585	0.4114	1.8718	-1.6717	-1.5945	-1.0815
ALS2CR12	0.35	0.49	1.85	0.433	0.5753	1.511	-1.7394	-1.5232	-1.2387
ALS2CR8	2.07	3.12	2.17	1.6182	2.0426	1.6645	-1.2115	-0.8849	-1.1718
ALX1	100.35	27.47	108.04	6.6632	4.8314	6.7687	1.0355	0.3283	1.0518
ALX3	1.37	3.16	2.85	1.2449	2.0566	1.9449	-1.3778	-0.8788	-1.0497
ALX4	0.36	0.02	0.35	0.4436	0.0286	0.433	-1.7347	-1.761	-1.7083
ALYREF	202.71	113.05	196.8	7.6704	6.8335	7.6279	1.4841	1.1992	1.4261
AMACR	3.31	1.92	2.27	2.1077	1.546	1.7093	-0.9935	-1.1009	-1.1523
AMBRA1	6.91	15.65	27.97	2.9837	4.0575	4.8565	-0.6034	-0.0084	0.2188
AMD1	202.51	94.35	57.29	7.669	6.5752	5.8652	1.4834	1.0868	0.6582
AMDHD2	31.96	39.06	50.67	5.0426	5.3241	5.6913	0.3137	0.5426	0.5824
AMFR	98.4	77.69	128.23	6.6352	6.2981	7.0138	1.023	0.9663	1.1586
AMIGO1	1.12	4.19	2.21	1.0841	2.3757	1.6826	-1.4494	-0.74	-1.1639
AMIGO2	17.47	0.56	0.03	4.2071	0.6415	0.0426	-0.0585	-1.4944	-1.8783
AMIGO3	4.95	1.29	6.83	2.5729	1.1953	2.969	-0.7863	-1.2535	-0.6035
AMMECR1	24.95	10.33	11.54	4.6977	3.5021	3.6485	0.16	-0.25	-0.3075
AMMECR1L	61.08	23.49	59.82	5.9561	4.6141	5.9265	0.7205	0.2338	0.6849
AMN1	15.71	3.87	8.42	4.0626	2.2839	3.2357	-0.1228	-0.7799	-0.4873
AMOT	30.97	0.22	13.68	4.9986	0.2869	3.8758	0.2941	-1.6487	-0.2085
AMOTL1	29.36	71.66	45.33	4.9241	6.1831	5.5339	0.2609	0.9163	0.5139
AMOTL2	31.41	83.24	32.34	5.0184	6.3964	5.0592	0.3029	1.0091	0.3071
AMPD2	23.71	27.16	37.2	4.627	4.8156	5.2555	0.1286	0.3214	0.3926
AMPD3	0.4	14.71	0.59	0.4854	3.9736	0.669	-1.7161	-0.0449	-1.6055
AMT	1.64	3.43	13.82	1.4005	2.1473	3.8895	-1.3085	-0.8393	-0.2025
AMY2B	0.35	6.85	2.72	0.433	2.9727	1.8953	-1.7394	-0.4803	-1.0712
AMZ1	0.27	0.49	0.14	0.3448	0.5753	0.189	-1.7787	-1.5232	-1.8146
AMZ2	115.18	134.95	149.57	6.8602	7.0869	7.2343	1.1232	1.3095	1.2546
AMZ2P1	14.89	3.37	19.6	3.99	2.1276	4.3646	-0.1551	-0.8479	0.0045
ANAPC1	34.84	24.34	14.4	5.1635	4.6633	3.9449	0.3675	0.2552	-0.1784
ANAPC10	14.29	6.75	13.47	3.9345	2.9542	3.855	-0.1799	-0.4883	-0.2175
ANAPC11	119.24	116.06	220.19	6.9098	6.8711	7.7891	1.1453	1.2156	1.4963
ANAPC13	47.63	114.28	91.59	5.6038	6.849	6.5328	0.5636	1.206	0.949
ANAPC16	44.65	21.66	23.75	5.5125	4.5021	4.6294	0.523	0.185	0.1198
ANAPC2	21.49	55.46	20.96	4.4912	5.8192	4.4568	0.0681	0.758	0.0446
ANAPC4	26.27	26.36	28.16	4.7692	4.774	4.8659	0.1919	0.3033	0.2229
ANAPC5	218.2	97.05	149.23	7.7761	6.6154	7.231	1.5312	1.1044	1.2532
ANAPC7	52.21	38.68	42.12	5.7336	5.3103	5.4303	0.6214	0.5366	0.4687
ANG	6.23	3.53	5.1	2.854	2.1795	2.6088	-0.6611	-0.8253	-0.7604
ANGEL1	34.03	11.56	29.8	5.1305	3.6508	4.9449	0.3528	-0.1853	0.2573
ANGEL2	20.55	13.13	22.52	4.4296	3.8207	4.5558	0.0406	-0.1114	0.0878
ANGPT1	4.14	2.53	0.53	2.3618	1.8197	0.6135	-0.8804	-0.9819	-1.6296
ANGPT2	2.89	0.1	41.14	1.9598	0.1375	5.3971	-1.0594	-1.7136	0.4543
ANGPTL1	0.88	0.07	3.38	0.9107	0.0976	2.1309	-1.5266	-1.731	-0.9686
ANGPTL2	12.54	95.79	9.21	3.7592	6.5968	3.3519	-0.258	1.0963	-0.4367
ANGPTL4	0.8	1.1	112.95	0.848	1.0704	6.8323	-1.5546	-1.3078	1.0795
ANK2	13.94	2.56	14.19	3.9011	1.8319	3.925	-0.1947	-0.9766	-0.187
ANK3	3.59	0.42	0	2.1985	0.5059	0	-0.9531	-1.5534	-1.8969
ANKAR	1.08	0.82	0.3	1.0566	0.8639	0.3785	-1.4617	-1.3976	-1.732
ANKDD1A	14.46	1.68	4.52	3.9505	1.4222	2.4647	-0.1728	-1.1548	-0.8232
ANKFY1	41.62	30.25	25.23	5.4135	4.9658	4.7131	0.4788	0.3867	0.1563
ANKH	27.65	21.11	0.97	4.8405	4.4666	0.9782	0.2236	0.1696	-1.4708
ANKHD1	1.96	3.23	2.58	1.5656	2.0807	1.84	-1.235	-0.8683	-1.0954
ANKHD1-EIF4EBP3	0.46	0.92	0.88	0.546	0.9411	0.9107	-1.6891	-1.3641	-1.5002
ANKIB1	34.15	32.8	43.35	5.1355	5.079	5.4709	0.355	0.436	0.4864
ANKLE1	0.98	3.81	2.18	0.9855	2.266	1.669	-1.4933	-0.7877	-1.1698
ANKLE2	58.99	50.91	49.02	5.9067	5.6979	5.6444	0.6985	0.7052	0.562
ANKMY1	4.72	6.3	6.24	2.516	2.8679	2.856	-0.8117	-0.5259	-0.6527
ANKMY2	27.22	26.77	25.69	4.8186	4.7955	4.7382	0.2139	0.3126	0.1672
ANKRA2	14.75	19.07	28.34	3.9773	4.327	4.8748	-0.1608	0.1088	0.2267
ANKRD10	85.36	50.02	51.84	6.4323	5.673	5.7236	0.9326	0.6944	0.5965
ANKRD11	66.36	66.14	57.3	6.0738	6.0691	5.8654	0.773	0.8667	0.6583
ANKRD12	8.69	14.21	17.6	3.2765	3.9269	4.2172	-0.4729	-0.0652	-0.0597
ANKRD13A	39.78	49.02	52.44	5.3498	5.6444	5.7398	0.4505	0.682	0.6036
ANKRD13B	17.75	10.21	39.67	4.2288	3.4867	5.3459	-0.0488	-0.2567	0.432
ANKRD13C	15.93	20.13	21.86	4.0815	4.4012	4.5148	-0.1144	0.1411	0.0699
ANKRD13D	19.12	56.86	30.17	4.3306	5.8545	4.9621	-0.0035	0.7733	0.2648
ANKRD16	6.53	7.03	7.61	2.9126	3.0054	3.106	-0.635	-0.4661	-0.5438
ANKRD17	53.72	18.86	61.23	5.774	4.3118	5.9595	0.6394	0.1022	0.6993
ANKRD18B	2.78	2.07	0.03	1.9184	1.6182	0.0426	-1.0778	-1.0695	-1.8783
ANKRD20A5P	0.78	1.08	0.24	0.8319	1.0566	0.3103	-1.5618	-1.3138	-1.7617
ANKRD20A9P	0.6	0.47	0.49	0.6781	0.5558	0.5753	-1.6303	-1.5317	-1.6463
ANKRD23	6.55	1.46	4.07	2.9165	1.2987	2.342	-0.6333	-1.2085	-0.8766
ANKRD24	0.39	0.87	0.82	0.4751	0.903	0.8639	-1.7207	-1.3806	-1.5205
ANKRD26	6.19	9.85	6.32	2.846	3.4396	2.8718	-0.6647	-0.2772	-0.6458
ANKRD27	29.69	38.8	42.92	4.9397	5.3147	5.4568	0.2678	0.5385	0.4803
ANKRD28	139.14	61.06	74.09	7.1307	5.9556	6.2305	1.2437	0.8173	0.8173
ANKRD29	0.3	34.47	0.13	0.3785	5.1485	0.1763	-1.7637	0.4662	-1.8201
ANKRD30B	0.73	0.48	0.58	0.7908	0.5656	0.6599	-1.5801	-1.5274	-1.6094
ANKRD32	9.57	7.92	6.89	3.4019	3.157	2.98	-0.4171	-0.4001	-0.5987
ANKRD33B	1.98	1.29	0.05	1.5753	1.1953	0.0704	-1.2306	-1.2535	-1.8662
ANKRD34A	2.32	2.39	4.62	1.7312	1.7613	2.4906	-1.1612	-1.0073	-0.8119
ANKRD36	4.8	4.39	1.72	2.5361	2.4303	1.4436	-0.8027	-0.7162	-1.268
ANKRD36B	3.08	3.79	1.49	2.0286	2.26	1.3161	-1.0288	-0.7903	-1.3235
ANKRD36BP1	20.46	7.78	14.89	4.4236	3.1342	3.99	0.038	-0.41	-0.1587
ANKRD37	4.85	1.73	10.04	2.5484	1.4489	3.4647	-0.7972	-1.1432	-0.3876
ANKRD39	65.62	20.86	36.82	6.0579	4.4502	5.2411	0.7659	0.1625	0.3863
ANKRD40	69.93	56.24	113.3	6.1483	5.839	6.8367	0.8062	0.7666	1.0814
ANKRD42	2.49	11.45	4.24	1.8032	3.6381	2.3896	-1.1291	-0.1908	-0.8559
ANKRD44	24.18	3.92	13.19	4.6542	2.2987	3.8268	0.1407	-0.7735	-0.2298
ANKRD45	3.34	0.39	1.34	2.1177	0.4751	1.2265	-0.9891	-1.5668	-1.3626
ANKRD46	19.97	5.29	23.06	4.3903	2.6531	4.5886	0.0231	-0.6193	0.102
ANKRD49	15.12	22.15	14.34	4.0108	4.5329	3.9392	-0.1459	0.1984	-0.1808
ANKRD5	0.24	4.84	0.14	0.3103	2.546	0.189	-1.794	-0.6659	-1.8146
ANKRD50	35.3	6.69	77.74	5.1819	2.943	6.299	0.3757	-0.4932	0.8472
ANKRD52	50.73	41.41	48.04	5.6929	5.4063	5.6159	0.6033	0.5784	0.5496
ANKRD53	0.1	3.43	3.11	0.1375	2.1473	2.0391	-1.871	-0.8393	-1.0086
ANKRD54	84.7	29.1	58.54	6.4212	4.9117	5.8958	0.9277	0.3632	0.6715
ANKRD6	8.04	1.08	3.81	3.1763	1.0566	2.266	-0.5176	-1.3138	-0.9097
ANKRD7	1.55	2	0.23	1.3505	1.585	0.2987	-1.3308	-1.084	-1.7668
ANKRD9	32.05	42.97	31.81	5.0466	5.4584	5.0361	0.3154	0.6011	0.297
ANKS1A	51.73	15.65	72.78	5.7206	4.0575	6.2052	0.6156	-0.0084	0.8063
ANKS1B	3.87	0.05	6.9	2.2839	0.0704	2.9819	-0.915	-1.7428	-0.5979
ANKS3	11.71	6.36	14.64	3.6679	2.8797	3.9672	-0.2986	-0.5207	-0.1687
ANKS6	10.31	41.28	7.85	3.4995	5.4019	3.1457	-0.3736	0.5765	-0.5265
ANKZF1	26.88	26.49	27.84	4.8012	4.7808	4.85	0.2061	0.3063	0.2159
ANLN	91.1	164.76	52.98	6.5251	7.373	5.7544	0.974	1.4339	0.6099
ANO1	0.2	0.57	0.02	0.263	0.6508	0.0286	-1.8151	-1.4904	-1.8845
ANO10	21.78	54.08	60.03	4.5097	5.7835	5.9314	0.0763	0.7424	0.687
ANO4	23.32	0.9	3.6	4.6041	0.926	2.2016	0.1184	-1.3706	-0.9378
ANO5	1.15	0.11	0.23	1.1043	0.1506	0.2987	-1.4404	-1.708	-1.7668
ANO6	47.51	49.68	82.31	5.6002	5.6633	6.3804	0.562	0.6902	0.8826
ANO7	1.82	1.54	1.06	1.4957	1.3448	1.0426	-1.2661	-1.1884	-1.4427
ANO8	4.6	9.29	7.75	2.4854	3.3632	3.1293	-0.8253	-0.3104	-0.5337
ANP32A	156.54	96.7	173.03	7.2996	6.6103	7.4432	1.3189	1.1021	1.3456
ANP32A-IT1	0.32	0.1	0.2	0.4005	0.1375	0.263	-1.7539	-1.7136	-1.7823
ANP32B	265.62	610.69	195.11	8.0586	9.2567	7.6155	1.657	2.2533	1.4207
ANP32E	129.07	57.95	126.43	7.0231	5.8814	6.9936	1.1958	0.7851	1.1497
ANPEP	2.64	195.91	1.23	1.8639	7.6214	1.157	-1.1021	1.542	-1.3929
ANTXR1	79.25	46.13	72.62	6.3264	5.5586	6.202	0.8855	0.6446	0.8049
ANTXR2	7.58	31.5	13.56	3.101	5.0224	3.8639	-0.5511	0.4114	-0.2136
ANXA1	83.44	3000.99	327.38	6.3999	11.5517	8.3592	0.9182	3.2517	1.7447
ANXA11	98.15	231.45	76.69	6.6315	7.8608	6.2797	1.0214	1.6461	0.8387
ANXA13	2.77	0.05	0.7	1.9146	0.0704	0.7655	-1.0795	-1.7428	-1.5634
ANXA2	1581.59	2978.18	2444.47	10.6281	11.5407	11.2559	2.8014	3.2469	3.0066
ANXA2P1	0.96	0.43	0.53	0.9709	0.516	0.6135	-1.4999	-1.549	-1.6296
ANXA2P2	58.37	111.36	108.78	5.8917	6.812	6.7785	0.6918	1.1899	1.056
ANXA4	70.27	100.85	104.74	6.1552	6.6703	6.7244	0.8092	1.1282	1.0325
ANXA5	1829.29	717.83	3009.97	10.8379	9.4895	11.556	2.8948	2.3546	3.1373
ANXA6	156.84	152.31	289.64	7.3023	7.2603	8.1831	1.3201	1.3849	1.6679
ANXA7	132.98	139.93	57.9	7.0659	7.1388	5.8802	1.2148	1.3321	0.6647
ANXA9	4.52	1.22	1.81	2.4647	1.1506	1.4906	-0.8345	-1.2729	-1.2476
AOC2	2.74	2.06	1.44	1.903	1.6135	1.2869	-1.0847	-1.0715	-1.3363
AOC3	1.01	0.33	0.79	1.0072	0.4114	0.84	-1.4837	-1.5945	-1.531
AP1AR	21.57	17.67	33.7	4.4963	4.2227	5.1169	0.0704	0.0635	0.3322
AP1B1	165.89	73.35	63.66	7.3828	6.2163	6.0148	1.356	0.9307	0.7234
AP1G1	67.59	42.46	57.7	6.0999	5.4416	5.8753	0.7846	0.5937	0.6626
AP1G2	16.62	9.49	33.4	4.1391	3.3909	5.1043	-0.0887	-0.2983	0.3267
AP1M1	71.49	91.49	93.18	6.1797	6.5312	6.5573	0.8201	1.0677	0.9597
AP1S1	193.42	184.82	147.21	7.603	7.5378	7.2115	1.4541	1.5056	1.2447
AP1S2	514.79	129.12	473.58	9.0106	7.0237	8.8905	2.081	1.282	1.9761
AP1S3	7.73	6.72	2.33	3.126	2.9486	1.7355	-0.54	-0.4908	-1.1408
AP2A1	115.91	102.38	126.13	6.8693	6.6918	6.9902	1.1272	1.1376	1.1483
AP2A2	37.44	43.51	51.5	5.2645	5.4761	5.7142	0.4125	0.6087	0.5924
AP2B1	126.17	120.73	237.01	6.9906	6.9275	7.8949	1.1813	1.2401	1.5424
AP2M1	337.26	572.35	578.45	8.402	9.1633	9.1785	1.8099	2.2127	2.1016
AP2S1	488.29	272.05	262.96	8.9345	8.093	8.0442	2.0471	1.7471	1.6074
AP3B1	33.68	76.57	74.38	5.116	6.2774	6.2361	0.3464	0.9573	0.8198
AP3B2	1.33	3.38	0.93	1.2203	2.1309	0.9486	-1.3887	-0.8465	-1.4837
AP3D1	119.27	117.8	147.58	6.9101	6.8924	7.2151	1.1455	1.2248	1.2463
AP3M1	42.57	41.57	30.29	5.4453	5.4118	4.9676	0.493	0.5807	0.2672
AP3M2	44.64	17.79	113.78	5.5122	4.2319	6.8427	0.5228	0.0675	1.084
AP3S1	81.35	211.35	166.61	6.3637	7.7303	7.389	0.9021	1.5893	1.322
AP3S2	2.31	1.75	1.45	1.7268	1.4594	1.2928	-1.1632	-1.1386	-1.3337
AP4B1	8.23	10.48	13.08	3.2063	3.5211	3.8156	-0.5042	-0.2417	-0.2347
AP4E1	12.44	12.05	8.45	3.7485	3.706	3.2403	-0.2627	-0.1613	-0.4853
AP4M1	20.3	20.03	26.84	4.4128	4.3944	4.7991	0.0332	0.1382	0.1938
AP4S1	1.51	2.89	3.09	1.3277	1.9598	2.0321	-1.3409	-0.9209	-1.0116
AP5B1	22.04	17.17	26.91	4.5261	4.1835	4.8027	0.0836	0.0464	0.1953
APAF1	22.42	10.16	13.39	4.5497	3.4803	3.847	0.0941	-0.2595	-0.221
APBA1	1.59	6.64	0.95	1.373	2.9336	0.9635	-1.3208	-0.4973	-1.4772
APBA2	36.07	11.05	49.64	5.2122	3.591	5.6622	0.3892	-0.2113	0.5698
APBA3	7.33	10.43	15.13	3.0583	3.5148	4.0117	-0.5701	-0.2445	-0.1493
APBB1	51.27	50.03	72.82	5.7079	5.6733	6.2059	0.61	0.6945	0.8066
APBB2	10.19	23.93	9.54	3.4841	4.6398	3.3978	-0.3805	0.2449	-0.4167
APBB3	7.52	18.03	16.38	3.0909	4.2502	4.1194	-0.5556	0.0755	-0.1024
APC	15.22	15.53	21.26	4.0197	4.047	4.4764	-0.1419	-0.0129	0.0532
APC2	0.46	0.21	0.73	0.546	0.275	0.7908	-1.6891	-1.6538	-1.5524
APCDD1	10.11	0.06	6.66	3.4738	0.0841	2.9373	-0.3851	-1.7369	-0.6173
APEH	104.62	124.2	87.06	6.7227	6.9681	6.4604	1.062	1.2578	0.9175
APEX1	233.83	276.71	326.34	7.8755	8.1174	8.3546	1.5754	1.7578	1.7427
APEX2	49.63	37.56	46	5.6619	5.269	5.5546	0.5895	0.5187	0.5229
APH1A	219.47	161.62	279.71	7.7844	7.3454	8.1329	1.5349	1.4219	1.6461
APH1B	8.18	12.16	25.55	3.1985	3.7181	4.7306	-0.5077	-0.156	0.1639
API5	107.75	121.57	114.84	6.7649	6.9375	6.856	1.0808	1.2445	1.0898
APIP	56.3	34.87	44.39	5.8405	5.1647	5.5043	0.669	0.4733	0.501
APITD1	9.74	4.93	7.28	3.4249	2.568	3.0496	-0.4068	-0.6563	-0.5684
APLF	2.85	1.52	4.37	1.9449	1.3334	2.4249	-1.066	-1.1934	-0.8405
APLN	1.28	10.57	1	1.189	3.5323	1	-1.4027	-0.2368	-1.4613
APLP1	8.22	2.22	2.81	3.2048	1.6871	1.9298	-0.5049	-1.0396	-1.0562
APLP2	241.18	123.51	478.74	7.9199	6.9601	8.9061	1.5952	1.2543	1.9829
APOA1BP	225.21	142.65	288.03	7.8215	7.1664	8.1751	1.5514	1.344	1.6645
APOBEC3B	19.35	31.51	15.64	4.347	5.0228	4.0566	0.0038	0.4115	-0.1297
APOBEC3C	146.75	112.74	87.89	7.207	6.8296	6.4739	1.2777	1.1975	0.9234
APOBEC3D	2.86	6.07	5.54	1.9486	2.8217	2.7093	-1.0644	-0.546	-0.7166
APOBEC3F	3.42	3.19	2.28	2.144	2.067	1.7137	-0.9773	-0.8743	-1.1504
APOBEC3G	5.79	3.18	10.79	2.7634	2.0635	3.5595	-0.7015	-0.8758	-0.3463
APOBEC3H	5.04	1.12	0.45	2.5945	1.0841	0.5361	-0.7767	-1.3019	-1.6634
APOC1	235.06	8.54	22.02	7.883	3.254	4.5248	1.5788	-0.3579	0.0743
APOD	892.26	6.12	188.79	9.8029	2.8319	7.5683	2.4339	-0.5415	1.4001
APOE	815.42	8.79	794.06	9.6732	3.2913	9.6349	2.3761	-0.3417	2.3004
APOL1	1.91	18.86	1.05	1.541	4.3118	1.0356	-1.2459	0.1022	-1.4457
APOL2	16.95	25.23	21.3	4.1659	4.7131	4.479	-0.0768	0.2768	0.0543
APOL3	0.15	2.41	0.73	0.2016	1.7698	0.7908	-1.8425	-1.0036	-1.5524
APOL4	0.25	0.28	0.71	0.3219	0.3561	0.774	-1.7889	-1.6185	-1.5597
APOL6	1.1	5.27	5.32	1.0704	2.6485	2.6599	-1.4555	-0.6213	-0.7381
APOLD1	32.25	1.4	4.77	5.0553	1.263	2.5286	0.3193	-1.224	-0.7954
APOM	0.36	0.46	0.23	0.4436	0.546	0.2987	-1.7347	-1.536	-1.7668
APOO	130.34	24.84	41.98	7.0372	4.6915	5.4256	1.202	0.2674	0.4667
APOOL	19.59	9.83	7.7	4.3639	3.437	3.121	0.0114	-0.2783	-0.5373
APOPT1	36.61	47.99	49.98	5.233	5.6144	5.6719	0.3985	0.6689	0.574
APP	1000.23	433.48	1107.15	9.9676	8.7631	10.1139	2.5072	2.0387	2.5091
APPBP2	35.04	16.46	44.48	5.1715	4.126	5.5072	0.3711	0.0214	0.5022
APPL1	25.36	31.66	37.39	4.7203	5.0295	5.2627	0.1701	0.4144	0.3957
APPL2	65.03	40.34	46.04	6.045	5.3695	5.5558	0.7602	0.5623	0.5234
APRT	231.38	211.79	171.43	7.8603	7.7333	7.4299	1.5687	1.5906	1.3398
APTX	33.87	32.8	20.52	5.1239	5.079	4.4276	0.3499	0.436	0.0319
AQP1	0.24	0.91	5.41	0.3103	0.9336	2.6803	-1.794	-1.3673	-0.7293
AQP11	1.81	7.67	2.65	1.4906	3.116	1.8679	-1.2684	-0.4179	-1.0832
AQP3	0.71	0.84	1.91	0.774	0.8797	1.541	-1.5875	-1.3908	-1.2256
AQR	38.47	25.97	25.86	5.3027	4.7533	4.7474	0.4295	0.2943	0.1712
AR	0.23	5.4	0.32	0.2987	2.6781	0.4005	-1.7993	-0.6085	-1.7224
ARAF	54.08	30.46	39.92	5.7835	4.9754	5.3547	0.6436	0.3909	0.4358
ARAP1	52.79	75.72	64.21	5.7493	6.2615	6.027	0.6284	0.9504	0.7287
ARAP2	4.31	2.2	0.99	2.4087	1.6781	0.9928	-0.8594	-1.0435	-1.4644
ARAP3	16.43	19.1	34.62	4.1235	4.3291	5.1546	-0.0957	0.1098	0.3486
ARC	0.96	7.62	5.43	0.9709	3.1077	2.6848	-1.4999	-0.4216	-0.7273
ARCN1	138.83	70.02	178.76	7.1275	6.1502	7.4899	1.2423	0.902	1.366
ARF1	617.58	362.31	713.71	9.2728	8.5051	9.4812	2.1978	1.9264	2.2335
ARF3	227.8	155.92	185.43	7.8379	7.2939	7.5425	1.5587	1.3995	1.3889
ARF4	282.64	435.08	452.99	8.1479	8.7684	8.8265	1.6968	2.041	1.9482
ARF5	234.8	210.66	235.93	7.8814	7.7256	7.8883	1.5781	1.5873	1.5395
ARF6	76.8	133.25	140.75	6.2817	7.0688	7.1472	0.8656	1.3016	1.2167
ARFGAP1	119.17	73.57	83.48	6.9089	6.2205	6.4005	1.1449	0.9326	0.8914
ARFGAP2	61.26	58.5	77.05	5.9602	5.8948	6.2863	0.7224	0.7909	0.8416
ARFGAP3	71.61	46.9	54.71	6.1821	5.582	5.7999	0.8212	0.6548	0.6297
ARFGEF1	23.29	33.64	67.64	4.6023	5.1144	6.101	0.1176	0.4514	0.7609
ARFGEF2	57.31	30.52	37.01	5.8657	4.9782	5.2483	0.6803	0.3921	0.3894
ARFIP1	41.65	18.23	53.57	5.4145	4.2653	5.77	0.4793	0.082	0.6167
ARFIP2	25.99	39.51	38.66	4.7544	5.3402	5.3096	0.1853	0.5496	0.4162
ARFRP1	33.89	21.34	33.79	5.1247	4.4816	5.1206	0.3503	0.1761	0.3338
ARG2	31.15	7.33	13.95	5.0067	3.0583	3.9021	0.2977	-0.443	-0.197
ARGLU1	147.69	96.57	149.32	7.2162	6.6084	7.2319	1.2818	1.1013	1.2536
ARHGAP1	37.29	91.26	137.23	5.2589	6.5276	7.1109	0.41	1.0662	1.2009
ARHGAP10	10.76	18.7	21.17	3.5558	4.3001	4.4705	-0.3485	0.0972	0.0506
ARHGAP11A	44.26	43.5	25.57	5.5002	5.4757	4.7317	0.5175	0.6086	0.1644
ARHGAP11B	8.4	3.83	3.24	3.2327	2.272	2.0841	-0.4925	-0.7851	-0.989
ARHGAP12	29.36	48.56	53.64	4.9241	5.6311	5.7719	0.2609	0.6762	0.6175
ARHGAP15	6.94	0.06	2.72	2.9891	0.0841	1.8953	-0.6009	-1.7369	-1.0712
ARHGAP17	54.87	76.83	57.11	5.804	6.2823	5.8607	0.6528	0.9594	0.6562
ARHGAP18	62.02	66.84	14.27	5.9777	6.0841	3.9326	0.7302	0.8732	-0.1837
ARHGAP19	13.33	4.52	4.32	3.841	2.4647	2.4114	-0.2215	-0.7013	-0.8464
ARHGAP20	9.96	0.54	1.12	3.4542	0.6229	1.0841	-0.3938	-1.5025	-1.4246
ARHGAP21	48.12	70.25	62.74	5.6182	6.1548	5.9941	0.5701	0.904	0.7144
ARHGAP22	0.51	21.45	0.38	0.5945	4.4886	0.4647	-1.6675	0.1792	-1.6945
ARHGAP23	14.83	32.76	64.72	3.9846	5.0772	6.0383	-0.1576	0.4352	0.7336
ARHGAP24	6.26	1.56	10.37	2.86	1.3561	3.5072	-0.6585	-1.1835	-0.3691
ARHGAP25	10.19	0.12	1.01	3.4841	0.1635	1.0072	-0.3805	-1.7023	-1.4581
ARHGAP26	19.48	2.15	2.33	4.3561	1.6554	1.7355	0.0079	-1.0534	-1.1408
ARHGAP27	2.18	5.13	1.33	1.669	2.6159	1.2203	-1.1889	-0.6355	-1.3653
ARHGAP29	1.97	68.05	0.58	1.5705	6.1096	0.6599	-1.2328	0.8843	-1.6094
ARHGAP30	0.81	0.15	0.71	0.856	0.2016	0.774	-1.551	-1.6857	-1.5597
ARHGAP31	29.49	1.54	26.83	4.9303	1.3448	4.7986	0.2636	-1.1884	0.1935
ARHGAP32	28.1	3.25	13.44	4.8629	2.0875	3.852	0.2337	-0.8654	-0.2188
ARHGAP33	13.13	6.92	10.53	3.8207	2.9855	3.5273	-0.2306	-0.4747	-0.3603
ARHGAP35	47.99	42.6	45.65	5.6144	5.4463	5.5438	0.5684	0.5958	0.5182
ARHGAP39	9.03	7.2	24.39	3.3262	3.0356	4.6662	-0.4508	-0.4529	0.1359
ARHGAP4	3.54	2.35	2.93	2.1827	1.7442	1.9745	-0.9601	-1.0147	-1.0367
ARHGAP42	24.98	8.01	39.77	4.6993	3.1715	5.3494	0.1608	-0.3938	0.4335
ARHGAP5	57.12	52.88	94.23	5.861	5.7517	6.5733	0.6782	0.7286	0.9667
ARHGAP5-AS1	47.14	12.73	41.51	5.5892	3.7793	5.4097	0.5571	-0.1294	0.4598
ARHGAP6	3.03	0.26	0.04	2.0108	0.3334	0.0566	-1.0367	-1.6284	-1.8723
ARHGDIA	583.74	480.53	570.72	9.1917	8.9115	9.1592	2.1616	2.1032	2.0932
ARHGDIB	400.59	35.81	170.48	8.6496	5.202	7.4219	1.9202	0.4895	1.3363
ARHGEF1	100.45	68.2	96.96	6.6646	6.1127	6.6141	1.0361	0.8857	0.9844
ARHGEF10	34.39	35.52	60.97	5.1453	5.1906	5.9535	0.3594	0.4845	0.6967
ARHGEF10L	19.58	8.29	36.77	4.3632	3.2157	5.2392	0.0111	-0.3746	0.3855
ARHGEF11	63.56	34.68	190.32	6.0126	5.157	7.5798	0.7457	0.4699	1.4052
ARHGEF12	47.85	22.7	64.98	5.6103	4.5668	6.044	0.5665	0.2132	0.7361
ARHGEF16	11.53	0.55	1.01	3.6473	0.6323	1.0072	-0.3078	-1.4984	-1.4581
ARHGEF17	11.52	26.18	18.16	3.6462	4.7645	4.26	-0.3083	0.2992	-0.0411
ARHGEF18	17.09	19.17	22.08	4.1771	4.3341	4.5286	-0.0718	0.112	0.0759
ARHGEF19	9.86	2.71	21.4	3.441	1.8914	4.4854	-0.3997	-0.9507	0.0571
ARHGEF2	108.19	48.84	109.06	6.7707	5.6392	6.7821	1.0834	0.6797	1.0576
ARHGEF25	12.38	10.74	21.41	3.742	3.5534	4.4861	-0.2656	-0.2277	0.0574
ARHGEF26	13.13	1.86	6.95	3.8207	1.516	2.991	-0.2306	-1.114	-0.5939
ARHGEF26-AS1	1.21	0.19	0.61	1.144	0.251	0.6871	-1.4227	-1.6643	-1.5976
ARHGEF3	11.52	12.74	11.87	3.6462	3.7803	3.6859	-0.3083	-0.129	-0.2912
ARHGEF35	5.06	0.24	16.87	2.5993	0.3103	4.1595	-0.7746	-1.6385	-0.0849
ARHGEF37	1.7	2.27	0.64	1.433	1.7093	0.7137	-1.294	-1.0299	-1.586
ARHGEF40	69.12	30.28	80.38	6.1318	4.9672	6.3466	0.7988	0.3873	0.8679
ARHGEF5	3.25	0.02	16.77	2.0875	0.0286	4.1514	-1.0025	-1.761	-0.0884
ARHGEF6	18.92	16.78	34.68	4.3161	4.1522	5.157	-0.0099	0.0328	0.3497
ARHGEF7	50.39	17.21	22.72	5.6834	4.1867	4.568	0.5991	0.0478	0.0931
ARHGEF9	16.05	12.19	10.2	4.0917	3.7214	3.4854	-0.1099	-0.1546	-0.3785
ARID1A	52.87	15.32	50.79	5.7514	4.0286	5.6946	0.6294	-0.021	0.5839
ARID1B	34.52	16.45	19.14	5.1506	4.1252	4.332	0.3618	0.0211	-0.0097
ARID2	16.95	8.4	10.77	4.1659	3.2327	3.557	-0.0768	-0.3672	-0.3473
ARID3A	6.29	10.48	10.5	2.8659	3.5211	3.5236	-0.6558	-0.2417	-0.3619
ARID3B	7.26	5.24	2.19	3.0461	2.6415	1.6736	-0.5755	-0.6243	-1.1678
ARID4A	9.78	9.34	13.13	3.4303	3.3702	3.8207	-0.4044	-0.3074	-0.2325
ARID4B	20.69	17.35	36.76	4.439	4.1977	5.2388	0.0448	0.0526	0.3853
ARID5A	12.35	24.5	9.25	3.7388	4.6724	3.3576	-0.267	0.2591	-0.4342
ARID5B	16.61	13.51	11.71	4.1383	3.859	3.6679	-0.0891	-0.0947	-0.299
ARIH1	58.15	34.21	58.51	5.8863	5.1379	5.8951	0.6894	0.4616	0.6712
ARIH2	79.81	54.86	82.2	6.3365	5.8037	6.3785	0.8899	0.7513	0.8818
ARL1	73.47	62.76	79.47	6.2186	5.9946	6.3304	0.8374	0.8343	0.8608
ARL10	2.55	6.8	9.91	1.8278	2.9635	3.4476	-1.1182	-0.4843	-0.395
ARL13B	9.62	11.04	8.56	3.4087	3.5898	3.257	-0.4141	-0.2119	-0.478
ARL15	16.78	8.83	18.89	4.1522	3.2972	4.314	-0.0829	-0.3391	-0.0176
ARL16	35.6	42.04	107.08	5.1938	5.4276	6.756	0.381	0.5876	1.0462
ARL17A	0.4	0.38	0.39	0.4854	0.4647	0.4751	-1.7161	-1.5713	-1.6899
ARL2	100.58	142.33	161.56	6.6665	7.1632	7.3448	1.0369	1.3426	1.3028
ARL2BP	129.84	113.73	91.91	7.0317	6.8421	6.5378	1.1996	1.203	0.9512
ARL3	14.44	14.23	5.51	3.9486	3.9288	2.7027	-0.1736	-0.0643	-0.7195
ARL4A	21.27	65.21	11.03	4.477	6.049	3.5886	0.0618	0.8579	-0.3336
ARL4C	7.85	134.33	17.1	3.1457	7.0803	4.1779	-0.5312	1.3066	-0.0769
ARL4D	11.48	32.6	65.97	3.6415	5.0704	6.0654	-0.3104	0.4322	0.7454
ARL5A	54.75	39.74	64.07	5.8009	5.3484	6.0239	0.6514	0.5532	0.7273
ARL5B	15.9	13.9	12.35	4.079	3.8972	3.7388	-0.1155	-0.0781	-0.2682
ARL6	4.53	5.02	4.36	2.4673	2.5898	2.4222	-0.8334	-0.6469	-0.8417
ARL6IP1	347.9	372.79	321.22	8.4467	8.5461	8.3319	1.8298	1.9442	1.7328
ARL6IP4	271.24	119.92	229.93	8.0887	6.9179	7.8513	1.6704	1.2359	1.5234
ARL6IP5	117.98	226.77	314.74	6.8946	7.8314	8.3026	1.1385	1.6333	1.72
ARL6IP6	27.86	19.84	19.14	4.851	4.3813	4.332	0.2283	0.1325	-0.0097
ARL8A	64.38	57.91	116.52	6.0308	5.8804	6.8768	0.7538	0.7846	1.0989
ARL8B	84.02	167.98	156.22	6.4097	7.4007	7.2966	0.9226	1.446	1.2818
ARMC1	47.45	45.87	113.4	5.5984	5.5506	6.8379	0.5612	0.6411	1.082
ARMC10	72.97	24.56	36.6	6.2089	4.6758	5.2327	0.8331	0.2606	0.3826
ARMC2	3.24	1.49	1.24	2.0841	1.3161	1.1635	-1.004	-1.2009	-1.39
ARMC5	14.21	5.89	8.61	3.9269	2.7845	3.2645	-0.1832	-0.5622	-0.4748
ARMC6	31.64	34.32	52.47	5.0286	5.1424	5.7407	0.3074	0.4636	0.6039
ARMC7	15.6	9.73	29.71	4.0531	3.4236	4.9406	-0.127	-0.2841	0.2554
ARMC8	16.01	21.03	20.45	4.0883	4.4614	4.4229	-0.1114	0.1673	0.0299
ARMC9	36.61	24.48	133.19	5.233	4.6713	7.0681	0.3985	0.2586	1.1822
ARMCX1	41.75	50.89	61.93	5.4179	5.6974	5.9757	0.4808	0.705	0.7063
ARMCX2	0.38	1.26	13.55	0.4647	1.1763	3.8629	-1.7253	-1.2617	-0.2141
ARMCX3	75.81	49.65	98.02	6.2632	5.6625	6.6296	0.8573	0.6898	0.9912
ARMCX4	2.91	3.1	10.79	1.9672	2.0356	3.5595	-1.0561	-0.8879	-0.3463
ARMCX5	29.67	11.18	29.73	4.9388	3.6064	4.9416	0.2674	-0.2046	0.2558
ARMCX5-GPRASP2	0.87	0.42	0.62	0.903	0.5059	0.696	-1.5301	-1.5534	-1.5937
ARMCX6	27.17	35.07	60.93	4.8161	5.1727	5.9526	0.2128	0.4768	0.6962
ARNT	33.4	23.16	42.95	5.1043	4.5945	5.4578	0.3412	0.2252	0.4807
ARNT2	147.72	6.47	26.75	7.2165	2.9011	4.7944	1.2819	-0.5114	0.1917
ARNTL	9.02	15.62	11.04	3.3248	4.0548	3.5898	-0.4514	-0.0095	-0.3331
ARNTL2	2.4	15.63	0.14	1.7655	4.0557	0.189	-1.1459	-0.0092	-1.8146
ARPC1A	415.22	354.85	361.9	8.7012	8.4751	8.5034	1.9432	1.9134	1.8075
ARPC1B	1084.65	377.06	625.18	10.0843	8.5625	9.2904	2.5592	1.9514	2.1503
ARPC2	475.66	540.13	546.95	8.8968	9.0798	9.0979	2.0303	2.1764	2.0665
ARPC3	576.45	629.41	576.1	9.1736	9.3001	9.1727	2.1536	2.2723	2.099
ARPC4	118.39	134.77	151.28	6.8995	7.085	7.2506	1.1407	1.3086	1.2617
ARPC5	300.32	358.02	289.73	8.2352	8.4879	8.1835	1.7356	1.9189	1.6681
ARPC5L	77.53	162.02	39.22	6.2952	7.3489	5.3298	0.8716	1.4234	0.425
ARPM1	0.36	5.74	2.02	0.4436	2.7527	1.5945	-1.7347	-0.576	-1.2023
ARPP19	127.76	143.7	135.97	7.0085	7.1769	7.0977	1.1893	1.3486	1.1951
ARRB1	12.59	8.58	30.39	3.7645	3.26	4.9722	-0.2556	-0.3553	0.2692
ARRB2	44.97	15.89	10.07	5.5226	4.0781	3.4686	0.5275	0.0006	-0.3859
ARRDC1	13.18	62.05	14.5	3.8258	5.9784	3.9542	-0.2283	0.8273	-0.1743
ARRDC2	8.41	10.22	25.48	3.2342	3.488	4.7268	-0.4918	-0.2561	0.1623
ARRDC3	42.51	49.55	83.17	5.4433	5.6596	6.3952	0.4921	0.6886	0.8891
ARRDC4	26.79	10	43.26	4.7965	3.4594	5.4679	0.2041	-0.2685	0.4851
ARSA	35.77	20.72	42.58	5.2005	4.441	5.4456	0.384	0.1584	0.4754
ARSB	13.91	8.96	23.33	3.8982	3.3161	4.6047	-0.196	-0.3309	0.1091
ARSD	10.05	8.32	22.51	3.466	3.2203	4.5552	-0.3885	-0.3726	0.0875
ARSE	14.73	0.22	5.49	3.9754	0.2869	2.6982	-0.1616	-1.6487	-0.7215
ARSG	3.72	6.3	0.53	2.2388	2.8679	0.6135	-0.9351	-0.5259	-1.6296
ARSI	1.92	0.06	36.2	1.546	0.0841	5.2172	-1.2437	-1.7369	0.3759
ARSJ	5.78	1.48	2.5	2.7613	1.3103	1.8074	-0.7024	-1.2034	-1.1096
ARSK	7.56	8.98	12.52	3.0976	3.319	3.757	-0.5526	-0.3296	-0.2602
ART3	20.78	0.21	3.44	4.4449	0.275	2.1506	0.0475	-1.6538	-0.96
ARTN	0.17	1.22	0.79	0.2265	1.1506	0.84	-1.8314	-1.2729	-1.531
ARV1	53.56	39.34	52.48	5.7698	5.3341	5.7409	0.6375	0.547	0.6041
ARVCF	6.56	10.43	10.3	2.9184	3.5148	3.4983	-0.6324	-0.2445	-0.3729
ASAH1	553.58	127.6	1450.18	9.1153	7.0067	10.503	2.1276	1.2746	2.6786
ASAP1	69.58	86.07	135.65	6.1412	6.4441	7.0943	0.803	1.0298	1.1936
ASAP2	48.47	78.67	56.82	5.6285	6.316	5.8535	0.5746	0.9741	0.6531
ASAP3	8.8	5.98	13.2	3.2928	2.8032	3.8278	-0.4657	-0.554	-0.2294
ASB1	14.76	16.06	17.65	3.9782	4.0925	4.2211	-0.1604	0.0069	-0.058
ASB11	1.02	0	4.78	1.0144	0	2.5311	-1.4805	-1.7735	-0.7943
ASB13	14.36	24.33	38.47	3.9411	4.6628	5.3027	-0.1769	0.2549	0.4131
ASB14	0.36	0.43	0.53	0.4436	0.516	0.6135	-1.7347	-1.549	-1.6296
ASB16	1.38	1.06	2.25	1.251	1.0426	1.7004	-1.3751	-1.3199	-1.1561
ASB2	7.87	1.47	9.5	3.1489	1.3045	3.3923	-0.5298	-1.206	-0.4191
ASB3	2.03	1.03	1.74	1.5993	1.0215	1.4542	-1.2199	-1.3291	-1.2634
ASB4	33.78	0.09	0.19	5.1202	0.1243	0.251	0.3482	-1.7194	-1.7876
ASB6	23.22	38.14	13.64	4.5981	5.2906	3.8718	0.1157	0.528	-0.2102
ASB7	15.1	19.88	12.28	4.009	4.384	3.7312	-0.1467	0.1337	-0.2715
ASB8	29.8	20.79	48.31	4.9449	4.4456	5.6238	0.2701	0.1604	0.553
ASB9	137.29	7.53	32.34	7.1116	3.0925	5.0592	1.2352	-0.4281	0.3071
ASCC1	18.26	4.34	11.3	4.2675	2.4168	3.6206	-0.0315	-0.7221	-0.3196
ASCC2	124.64	71.42	79.93	6.9732	6.1783	6.3386	1.1735	0.9142	0.8644
ASCC3	41.49	20.72	11.88	5.4091	4.441	3.6871	0.4769	0.1584	-0.2907
ASF1A	35.34	37.96	16.35	5.1835	5.2839	4.1169	0.3764	0.5251	-0.1034
ASF1B	54.03	62.98	33.3	5.7821	5.9995	5.1001	0.6431	0.8364	0.3249
ASH1L	20.25	14.95	30.31	4.4094	3.9955	4.9686	0.0316	-0.0354	0.2676
ASH2L	72.61	29.59	158.11	6.2018	4.935	7.3139	0.83	0.3733	1.2893
ASL	30.07	43.77	40.85	4.9575	5.4845	5.3872	0.2757	0.6124	0.4499
ASNA1	106.02	247.49	203.12	6.7417	7.957	7.6733	1.0705	1.688	1.4459
ASNS	27.59	10.1	41	4.8374	3.4725	5.3923	0.2223	-0.2629	0.4522
ASNSD1	53.92	54.97	61.06	5.7793	5.8066	5.9556	0.6418	0.7525	0.6976
ASPA	9.62	2.89	18.99	3.4087	1.9598	4.3212	-0.4141	-0.9209	-0.0144
ASPH	71.94	52.16	142.32	6.1886	5.7323	7.1631	0.8241	0.7202	1.2236
ASPHD1	5.62	9.92	7.71	2.7268	3.4489	3.1227	-0.7178	-0.2731	-0.5366
ASPHD2	5.24	3.88	3.83	2.6415	2.2869	2.272	-0.7557	-0.7786	-0.9071
ASPM	17.95	28.66	17.73	4.2441	4.8904	4.2273	-0.042	0.354	-0.0553
ASPSCR1	33.68	30.88	48.51	5.116	4.9946	5.6296	0.3464	0.3993	0.5556
ASRGL1	13.73	0.12	4.01	3.8807	0.1635	2.3248	-0.2038	-1.7023	-0.8841
ASS1	0.89	0.81	3.97	0.9184	0.856	2.3132	-1.5232	-1.4011	-0.8892
ASTE1	4.69	7.59	12.99	2.5084	3.1027	3.8063	-0.815	-0.4238	-0.2387
ASTN2	3.8	5.41	2.92	2.263	2.6803	1.9709	-0.9243	-0.6075	-1.0383
ASUN	54.4	30.45	35.15	5.7918	4.975	5.1759	0.6474	0.3907	0.3579
ASXL1	43.57	30.15	41.2	5.478	4.9612	5.3992	0.5076	0.3847	0.4552
ASXL2	26.89	17.75	14.44	4.8017	4.2288	3.9486	0.2064	0.0661	-0.1768
ATAD1	122.33	48.59	0.92	6.9464	5.632	0.9411	1.1616	0.6765	-1.4869
ATAD2	47.57	35.43	62.38	5.602	5.1871	5.986	0.5628	0.483	0.7108
ATAD2B	8.74	2.93	6.35	3.2839	1.9745	2.8777	-0.4696	-0.9145	-0.6433
ATAD3A	78.93	15.89	41.02	6.3207	4.0781	5.393	0.8829	0.0006	0.4525
ATAD3B	60.67	11.99	28.25	5.9465	3.6993	4.8704	0.7163	-0.1642	0.2248
ATAD3C	0.34	0.04	0.55	0.4222	0.0566	0.6323	-1.7442	-1.7488	-1.6215
ATAD5	10.26	6.94	6.23	3.4931	2.9891	2.854	-0.3765	-0.4731	-0.6536
ATAT1	1.8	0.46	3.44	1.4854	0.546	2.1506	-1.2707	-1.536	-0.96
ATE1	19.24	15.02	14.22	4.3391	4.0018	3.9279	0.0004	-0.0326	-0.1858
ATF1	27.52	31.13	22.84	4.8339	5.0058	4.5753	0.2207	0.4042	0.0963
ATF2	29.29	23.77	36.72	4.9208	4.6305	5.2373	0.2594	0.2409	0.3846
ATF3	20.02	16.54	31.17	4.3937	4.1326	5.0076	0.0246	0.0243	0.2846
ATF4	628.49	396.18	592.6	9.298	8.6336	9.2133	2.209	1.9823	2.1168
ATF5	32.89	31.89	25.94	5.0828	5.0396	4.7517	0.3316	0.4188	0.1731
ATF6	45.55	24.55	40.92	5.5407	4.6753	5.3896	0.5355	0.2604	0.451
ATF6B	23.68	26.48	56.06	4.6253	4.7803	5.8344	0.1278	0.3061	0.6448
ATF7	23.18	12.57	17.3	4.5957	3.7623	4.1938	0.1146	-0.1368	-0.0699
ATF7IP	29.31	31.62	25.33	4.9217	5.0277	4.7186	0.2598	0.4137	0.1587
ATF7IP2	2.79	0.01	2.06	1.9222	0.0144	1.6135	-1.0761	-1.7672	-1.194
ATG10	6.45	6.45	11.24	2.8972	2.8972	3.6135	-0.6419	-0.5131	-0.3227
ATG12	24.48	40.01	35.01	4.6713	5.3579	5.1703	0.1483	0.5573	0.3555
ATG13	30.19	43.64	39.04	4.963	5.4803	5.3234	0.2782	0.6105	0.4221
ATG14	16.26	17.39	35.1	4.1094	4.2008	5.1739	-0.102	0.054	0.357
ATG16L1	30.92	54.29	31.13	4.9964	5.7889	5.0058	0.2931	0.7448	0.2838
ATG16L2	5.84	16.26	9.98	2.774	4.1094	3.4568	-0.6968	0.0142	-0.391
ATG2A	16.61	40.77	18.99	4.1383	5.3844	4.3212	-0.0891	0.5688	-0.0144
ATG2B	19.36	15.65	13.9	4.3477	4.0575	3.8972	0.0041	-0.0084	-0.1991
ATG3	109.47	128.89	131.12	6.7875	7.0211	7.0457	1.0908	1.2809	1.1725
ATG4A	18.38	11.69	14.62	4.2765	3.6656	3.9653	-0.0275	-0.1789	-0.1695
ATG4B	57.04	41.55	52.32	5.859	5.4111	5.7366	0.6773	0.5805	0.6022
ATG4C	12.44	11.64	20.93	3.7485	3.6599	4.4548	-0.2627	-0.1813	0.0438
ATG4D	27.12	21.36	29	4.8135	4.4828	4.9069	0.2116	0.1767	0.2407
ATG5	38.69	43.46	18.28	5.3107	5.4744	4.269	0.4331	0.608	-0.0372
ATG7	7.31	21.33	9.93	3.0548	4.4809	3.4502	-0.5717	0.1758	-0.3939
ATG9A	87.37	58.03	92.64	6.4655	5.8834	6.5491	0.9474	0.7859	0.9561
ATG9B	0.44	0.04	0.36	0.5261	0.0566	0.4436	-1.698	-1.7488	-1.7037
ATHL1	17.58	27.64	36.06	4.2157	4.84	5.2118	-0.0546	0.332	0.3735
ATIC	142.23	169.67	118.74	7.1622	7.4151	6.9038	1.2577	1.4522	1.1106
ATL1	1.82	5.89	0.78	1.4957	2.7845	0.8319	-1.2661	-0.5622	-1.5345
ATL2	57.77	31.35	38.27	5.877	5.0157	5.2954	0.6853	0.4085	0.4099
ATL3	31.72	61.43	43.7	5.0321	5.9642	5.4822	0.309	0.8211	0.4913
ATM	25.31	9.05	30.07	4.7175	3.3291	4.9575	0.1689	-0.3252	0.2627
ATMIN	56.42	45.37	57.02	5.8435	5.5351	5.8585	0.6704	0.6344	0.6553
ATN1	138.37	94.08	141.67	7.1228	6.5711	7.1565	1.2402	1.0851	1.2207
ATOH8	2.95	1.74	3.6	1.9819	1.4542	2.2016	-1.0496	-1.1409	-0.9378
ATOX1	227.95	280.1	324.21	7.8389	8.1349	8.3452	1.5591	1.7654	1.7386
ATP10A	8.38	0.03	12.82	3.2296	0.0426	3.7887	-0.4938	-1.7549	-0.2464
ATP10B	19.63	0.06	5.58	4.3667	0.0841	2.7181	0.0126	-1.7369	-0.7128
ATP10D	5.67	16.57	7.98	2.7377	4.135	3.1667	-0.7129	0.0254	-0.5174
ATP11A	39.77	11.6	12.84	5.3494	3.6554	3.7908	0.4503	-0.1833	-0.2455
ATP11B	20.24	26.49	18.47	4.4087	4.7808	4.2832	0.0313	0.3063	-0.031
ATP11C	13.46	9	19.8	3.854	3.3219	4.3785	-0.2157	-0.3284	0.0105
ATP13A1	82.05	53.04	92.63	6.3759	5.756	6.5489	0.9075	0.7305	0.956
ATP13A2	69.41	15.58	48.85	6.1377	4.0514	5.6395	0.8014	-0.011	0.5599
ATP13A3	34.08	97.01	51.26	5.1326	6.6149	5.7076	0.3537	1.1041	0.5895
ATP1A1	1064.61	469.03	867.31	10.0575	8.8766	9.7621	2.5473	2.088	2.3558
ATP1A1OS	1.47	4.77	3.61	1.3045	2.5286	2.2048	-1.3513	-0.6735	-0.9364
ATP1A2	0.29	0.07	4.53	0.3674	0.0976	2.4673	-1.7686	-1.731	-0.8221
ATP1A3	0.37	0.13	0.59	0.4542	0.1763	0.669	-1.73	-1.6968	-1.6055
ATP1B1	256.52	111.29	97.96	8.0085	6.8111	6.6288	1.6347	1.1895	0.9908
ATP1B2	2.49	0.04	1.1	1.8032	0.0566	1.0704	-1.1291	-1.7488	-1.4306
ATP1B3	331.2	166.45	325.01	8.3759	7.3876	8.3488	1.7983	1.4403	1.7401
ATP2A1	2.98	1.15	0.72	1.9928	1.1043	0.7824	-1.0447	-1.2931	-1.5561
ATP2A2	335.23	100.82	244.2	8.3933	6.6699	7.9378	1.806	1.128	1.5611
ATP2B1	50.2	65.17	43.9	5.6781	6.0481	5.4886	0.5967	0.8576	0.4941
ATP2B4	72.37	84.22	103.76	6.1971	6.4131	6.7109	0.8279	1.0164	1.0266
ATP2C1	39.3	43.94	117.33	5.3327	5.4899	6.8867	0.4429	0.6148	1.1032
ATP5A1	794.72	655.47	672.8	9.6361	9.3586	9.3962	2.3596	2.2977	2.1964
ATP5B	2045.52	762.22	1486.47	10.999	9.576	10.5386	2.9666	2.3922	2.6941
ATP5C1	470.61	395.24	486.77	8.8815	8.6302	8.9301	2.0235	1.9808	1.9934
ATP5D	133.38	207.19	103.4	7.0702	7.7018	6.706	1.2167	1.5769	1.0245
ATP5E	718.8	615.1	665.97	9.4915	9.267	9.3815	2.2952	2.2578	2.19
ATP5F1	183.73	242.5	265.85	7.5293	7.9278	8.0599	1.4212	1.6753	1.6143
ATP5G1	536.33	182.38	343.78	9.0697	7.5187	8.4295	2.1073	1.4973	1.7753
ATP5G2	551.3	466.28	453.67	9.1093	8.8681	8.8287	2.125	2.0843	1.9492
ATP5G3	376.87	147.2	278.45	8.5617	7.2114	8.1264	1.8811	1.3636	1.6433
ATP5H	510.97	632.94	693.08	8.9999	9.3082	9.439	2.0762	2.2758	2.215
ATP5I	595.16	379.9	447.25	9.2196	8.5733	8.8082	2.1741	1.9561	1.9402
ATP5J	318.75	190.29	164.12	8.3208	7.5796	7.3674	1.7738	1.5238	1.3126
ATP5J2	754.01	407.11	506.22	9.5604	8.6728	8.9865	2.3258	1.9994	2.0179
ATP5L	252.5	106.05	251.24	7.9858	6.7421	7.9787	1.6246	1.1595	1.5789
ATP5O	612.16	398.8	391.62	9.2601	8.6431	8.617	2.1921	1.9864	1.857
ATP5S	7.01	16.51	8.08	3.0018	4.1301	3.1827	-0.5953	0.0232	-0.5104
ATP5SL	57.68	44.01	64.22	5.8748	5.4922	6.0272	0.6843	0.6157	0.7288
ATP6AP1	318.87	115.04	281	8.3213	6.8585	8.1396	1.774	1.2101	1.649
ATP6AP1L	1.24	1.42	2.33	1.1635	1.275	1.7355	-1.4141	-1.2188	-1.1408
ATP6AP2	414.85	220.32	366.87	8.6999	7.79	8.5231	1.9426	1.6153	1.816
ATP6V0A1	80.67	27.01	100.06	6.3517	4.8079	6.6591	0.8967	0.318	1.004
ATP6V0A2	16.64	9.72	13.8	4.1408	3.4222	3.8875	-0.088	-0.2847	-0.2034
ATP6V0A4	16	3.24	2.59	4.0875	2.0841	1.844	-0.1117	-0.8669	-1.0936
ATP6V0B	293.67	103.56	303.41	8.203	6.7082	8.2499	1.7213	1.1447	1.697
ATP6V0C	409.52	273.3	406.37	8.6813	8.0996	8.6702	1.9343	1.75	1.8801
ATP6V0D1	183	186.99	251.87	7.5236	7.5545	7.9823	1.4187	1.5129	1.5805
ATP6V0E1	248.52	518.85	697.49	7.963	9.022	9.4481	1.6144	2.1512	2.219
ATP6V0E2	76.25	1.32	10.34	6.2715	1.2141	3.5033	0.861	-1.2453	-0.3707
ATP6V1A	78.99	58.96	108.9	6.3217	5.9059	6.78	0.8834	0.7957	1.0567
ATP6V1B1	2.3	0.32	1.82	1.7225	0.4005	1.4957	-1.1651	-1.5992	-1.2453
ATP6V1B2	279.72	229.92	999.08	8.133	7.8512	9.9659	1.6901	1.642	2.4446
ATP6V1C1	65.48	73.8	180.03	6.0548	6.225	7.5001	0.7645	0.9345	1.3704
ATP6V1C2	2.87	0.54	1.48	1.9523	0.6229	1.3103	-1.0627	-1.5025	-1.3261
ATP6V1D	88.73	118.51	106.12	6.4875	6.901	6.7431	0.9572	1.2286	1.0406
ATP6V1E1	532.33	298	332.94	9.0589	8.224	8.3834	2.1025	1.8041	1.7552
ATP6V1E2	5.04	2.12	4.94	2.5945	1.6415	2.5705	-0.7767	-1.0594	-0.7771
ATP6V1F	310.95	239.03	297.11	8.2852	7.9071	8.2197	1.7579	1.6662	1.6839
ATP6V1G1	173.81	435.11	161.44	7.4496	8.7685	7.3438	1.3857	2.041	1.3023
ATP6V1G2	0.1	0.22	1.18	0.1375	0.2869	1.1243	-1.871	-1.6487	-1.4071
ATP6V1H	83.24	93.4	247.4	6.3964	6.5607	7.9565	0.9167	1.0806	1.5692
ATP7A	21.18	5.21	49.48	4.4712	2.6346	5.6576	0.0592	-0.6274	0.5678
ATP7B	9.53	3.51	10.89	3.3964	2.1731	3.5717	-0.4195	-0.8281	-0.341
ATP8A1	0.46	0.11	1.03	0.546	0.1506	1.0215	-1.6891	-1.708	-1.4519
ATP8A2	0.15	0.54	0.05	0.2016	0.6229	0.0704	-1.8425	-1.5025	-1.8662
ATP8B1	0.26	21.99	7.42	0.3334	4.5229	3.0738	-1.7838	0.1941	-0.5578
ATP8B2	65.13	42.62	85.69	6.0472	5.4469	6.4378	0.7611	0.596	0.9076
ATP8B3	0.18	1.32	2.2	0.2388	1.2141	1.6781	-1.8259	-1.2453	-1.1659
ATP9A	33.95	15.5	24.03	5.1272	4.0444	4.6456	0.3514	-0.0141	0.1269
ATP9B	8.09	7.75	14.03	3.1843	3.1293	3.9098	-0.514	-0.4122	-0.1937
ATPAF1	36.57	57.77	52.73	5.2315	5.877	5.7477	0.3978	0.7831	0.607
ATPAF2	30.8	21.59	14.31	4.991	4.4976	3.9364	0.2907	0.1831	-0.1821
ATPBD4	8.61	7.35	11.84	3.2645	3.0618	3.6826	-0.4783	-0.4415	-0.2926
ATPIF1	75.31	34.37	58.08	6.2538	5.1445	5.8846	0.8531	0.4645	0.6666
ATR	10.29	15.66	13.83	3.497	4.0583	3.8904	-0.3747	-0.008	-0.2021
ATRIP	9.59	13.89	15.35	3.4046	3.8963	4.0312	-0.4159	-0.0785	-0.1408
ATRN	39.18	25.35	54.97	5.3284	4.7197	5.8066	0.441	0.2797	0.6327
ATRNL1	5.89	0.26	1.53	2.7845	0.3334	1.3391	-0.6921	-1.6284	-1.3135
ATRX	31.61	13.85	31.54	5.0272	3.8924	5.0241	0.3068	-0.0802	0.2918
ATXN1	9.33	13.94	15.3	3.3688	3.9011	4.0268	-0.4318	-0.0764	-0.1427
ATXN10	187.87	93.38	119.04	7.5612	6.5604	6.9074	1.4355	1.0804	1.1122
ATXN1L	34.54	22.54	35.32	5.1514	4.557	5.1827	0.3621	0.2089	0.3609
ATXN2	39.88	29.93	35.88	5.3533	4.9509	5.2048	0.4521	0.3803	0.3705
ATXN2L	117.98	115.85	136.08	6.8946	6.8685	7.0989	1.1385	1.2145	1.1956
ATXN3	5.62	7.22	6.37	2.7268	3.0391	2.8817	-0.7178	-0.4514	-0.6415
ATXN7	7.22	10.23	11.44	3.0391	3.4893	3.6369	-0.5787	-0.2556	-0.3125
ATXN7L1	3.61	3.55	3.6	2.2048	2.1859	2.2016	-0.9503	-0.8226	-0.9378
ATXN7L2	4.64	3.81	6.65	2.4957	2.266	2.9355	-0.8207	-0.7877	-0.6181
ATXN7L3	60.52	45.7	94.74	5.943	5.5454	6.581	0.7147	0.6389	0.97
ATXN7L3B	149.86	72.79	163.92	7.2371	6.2054	7.3656	1.2911	0.926	1.3118
AUH	19.42	16.48	5.89	4.3519	4.1276	2.7845	0.006	0.0221	-0.6839
AUP1	331.13	141.78	251.92	8.3756	7.1577	7.9825	1.7982	1.3402	1.5806
AURKA	74.89	54.14	41.33	6.2458	5.785	5.4036	0.8496	0.7431	0.4571
AURKAIP1	261.66	103.66	183.58	8.0371	6.7096	7.5281	1.6474	1.1453	1.3826
AURKAPS1	3.23	3.13	3.15	2.0807	2.0461	2.0531	-1.0056	-0.8834	-1.0025
AURKB	78.76	83.59	23.35	6.3176	6.4024	4.6058	0.8815	1.0117	0.1096
AUTS2	12.15	6.86	17.04	3.717	2.9745	4.1731	-0.2767	-0.4795	-0.0789
AVEN	12.68	20.64	18.13	3.774	4.4356	4.2578	-0.2514	0.1561	-0.0421
AVIL	0.26	1.68	0.68	0.3334	1.4222	0.7485	-1.7838	-1.1548	-1.5708
AVL9	51.77	47.4	37.29	5.7216	5.5969	5.2589	0.6161	0.6613	0.3941
AVPI1	96.87	77.23	6.97	6.6128	6.2897	2.9946	1.013	0.9626	-0.5924
AXIN1	35.45	27.11	46.9	5.1878	4.813	5.582	0.3784	0.3203	0.5348
AXIN2	6.54	4.04	5.26	2.9146	2.3334	2.6462	-0.6341	-0.7584	-0.7441
AXL	4.94	469.83	21.73	2.5705	8.8791	4.5065	-0.7874	2.0891	0.0663
AZGP1	121.11	0.81	31.88	6.932	0.856	5.0391	1.1552	-1.4011	0.2983
AZI1	26.49	12.31	26.56	4.7808	3.7344	4.7845	0.1971	-0.1489	0.1874
AZI2	26.12	35.16	38.2	4.7613	5.1763	5.2928	0.1884	0.4783	0.4088
AZIN1	133.16	81.29	299.45	7.0678	6.3626	8.231	1.2157	0.9944	1.6888
B2M	1444.52	2467.91	1673.33	10.4974	11.2697	10.7094	2.7432	3.129	2.7685
B3GALNT1	2.85	6.93	15.67	1.9449	2.9873	4.0592	-1.066	-0.4739	-0.1286
B3GALNT2	26.25	20.32	25.84	4.7682	4.4141	4.7463	0.1914	0.1468	0.1708
B3GALT1	5.51	0.98	7.35	2.7027	0.9855	3.0618	-0.7285	-1.3447	-0.5631
B3GALT2	2.46	0.07	13.71	1.7908	0.0976	3.8787	-1.1347	-1.731	-0.2072
B3GALT4	0.78	0.93	5.37	0.8319	0.9486	2.6713	-1.5618	-1.3608	-0.7332
B3GALT6	42.11	10.7	40.67	5.43	3.5484	5.3809	0.4862	-0.2298	0.4472
B3GALTL	24.68	17.76	30.23	4.6826	4.2296	4.9649	0.1533	0.0665	0.266
B3GAT3	91.71	13.26	168.66	6.5347	3.8339	7.4065	0.9782	-0.1056	1.3296
B3GNT1	48.16	72.94	74.36	5.6194	6.2083	6.2357	0.5706	0.9272	0.8196
B3GNT2	41.44	25.43	38.26	5.4074	4.7241	5.295	0.4761	0.2816	0.4098
B3GNT5	9.25	48.33	9.04	3.3576	5.6244	3.3277	-0.4368	0.6732	-0.4472
B3GNT7	0.25	14.68	29.09	0.3219	3.9709	4.9112	-1.7889	-0.0461	0.2426
B3GNT9	3.53	32.32	3.11	2.1795	5.0583	2.0391	-0.9615	0.427	-1.0086
B3GNTL1	11.6	3.89	13.98	3.6554	2.2898	3.905	-0.3042	-0.7773	-0.1958
B4GALNT1	24.62	0.09	1.45	4.6792	0.1243	1.2928	0.1518	-1.7194	-1.3337
B4GALNT3	18.44	0.12	3.43	4.281	0.1635	2.1473	-0.0256	-1.7023	-0.9615
B4GALNT4	17.39	5.34	22.41	4.2008	2.6645	4.5491	-0.0612	-0.6144	0.0848
B4GALT1	32.91	80.93	29.59	5.0836	6.3563	4.935	0.3319	0.9916	0.253
B4GALT2	30.02	32.8	85.79	4.9551	5.079	6.4395	0.2747	0.436	0.9084
B4GALT3	53.86	25.44	87.77	5.7777	4.7247	6.472	0.6411	0.2818	0.9225
B4GALT4	39.9	26.97	47.84	5.354	4.8058	5.61	0.4524	0.3171	0.547
B4GALT5	53.83	42.99	79.88	5.7769	5.4591	6.3377	0.6407	0.6013	0.864
B4GALT6	23.56	18.61	36.51	4.6182	4.2935	5.2292	0.1247	0.0943	0.3811
B4GALT7	28.43	34.25	48.8	4.8792	5.1396	5.6381	0.2409	0.4623	0.5592
B7H6	7.22	3.45	3.05	3.0391	2.1538	2.0179	-0.5787	-0.8365	-1.0178
B9D1	23.73	14.72	4.93	4.6282	3.9745	2.568	0.1291	-0.0445	-0.7782
B9D2	5.86	5.74	6.35	2.7782	2.7527	2.8777	-0.6949	-0.576	-0.6433
BAALC	37.55	1.67	96.74	5.2687	1.4168	6.6109	0.4144	-1.1571	0.983
BABAM1	108.65	137.07	115.97	6.7768	7.1093	6.87	1.0861	1.3192	1.0959
BACE1	21.92	12.78	44.69	4.5185	3.7845	5.5138	0.0803	-0.1271	0.5051
BACE1-AS	2.49	2.37	5.07	1.8032	1.7527	2.6017	-1.1291	-1.011	-0.7635
BACE2	282.51	76.78	255.44	8.1473	6.2813	8.0025	1.6965	0.959	1.5893
BACH1	28.46	39.48	25.13	4.8807	5.3391	4.7076	0.2416	0.5492	0.1539
BACH2	2.72	1.06	0.45	1.8953	1.0426	0.5361	-1.0881	-1.3199	-1.6634
BAD	51.62	67	72.74	5.7175	6.0875	6.2044	0.6143	0.8747	0.8059
BAG1	30.68	17.87	11.55	4.9855	4.238	3.6496	0.2882	0.0702	-0.307
BAG2	40.98	22.64	16.59	5.3916	4.5632	4.1367	0.4691	0.2116	-0.0948
BAG3	53.19	137.11	39.92	5.76	7.1097	5.3547	0.6332	1.3194	0.4358
BAG4	18.6	16.55	42.89	4.2928	4.1334	5.4558	-0.0203	0.0246	0.4798
BAG5	29.13	37.29	36.7	4.9131	5.2589	5.2365	0.256	0.5142	0.3843
BAG6	22.57	27.61	30.33	4.5589	4.8384	4.9695	0.0982	0.3313	0.268
BAHCC1	32.43	0.17	34.28	5.0631	0.2265	5.1408	0.3228	-1.6749	0.3426
BAHD1	35.03	21.82	35.87	5.1711	4.5122	5.2044	0.3709	0.1894	0.3703
BAI1	0.62	0.05	14.3	0.696	0.0704	3.9355	-1.6223	-1.7428	-0.1825
BAI2	13.54	6.29	17.83	3.862	2.8659	4.235	-0.2122	-0.5267	-0.052
BAI3	0.57	0.01	1.93	0.6508	0.0144	1.5509	-1.6424	-1.7672	-1.2213
BAIAP2	21.64	51.11	42.95	4.5008	5.7035	5.4578	0.0724	0.7077	0.4807
BAIAP2L1	3.17	20.47	10	2.06	4.4243	3.4594	-1.0147	0.1512	-0.3899
BAIAP2L2	3.46	1.61	14.18	2.157	1.384	3.9241	-0.9715	-1.1714	-0.1874
BAIAP3	0.36	0.18	0.21	0.4436	0.2388	0.275	-1.7347	-1.6696	-1.7771
BAK1	74.68	68.57	67.39	6.2418	6.1204	6.0957	0.8478	0.889	0.7586
BAMBI	307.22	3.05	102.92	8.2678	2.0179	6.6993	1.7502	-0.8956	1.0216
BANF1	210.16	442.28	296.48	7.7222	8.7921	8.2166	1.5071	2.0512	1.6826
BANP	8.82	6.43	14.7	3.2957	2.8934	3.9727	-0.4644	-0.5148	-0.1663
BAP1	61.35	67.86	100.71	5.9623	6.1056	6.6683	0.7233	0.8826	1.0081
BARD1	12.64	10.9	7.42	3.7698	3.5729	3.0738	-0.2532	-0.2192	-0.5578
BASP1	0.41	143.33	3.98	0.4957	7.1732	2.3161	-1.7115	1.347	-0.8879
BATF	7.2	2.66	0.58	3.0356	1.8718	0.6599	-0.5802	-0.9592	-1.6094
BATF2	16.99	6.21	17.6	4.1691	2.85	4.2172	-0.0754	-0.5337	-0.0597
BATF3	1.87	4.9	1.89	1.5211	2.5607	1.5311	-1.2548	-0.6595	-1.2299
BAX	198.08	243.41	136.51	7.6372	7.9332	7.1034	1.4693	1.6776	1.1976
BAZ1A	25.17	23.83	49.98	4.7098	4.634	5.6719	0.1655	0.2424	0.574
BAZ1B	95.6	63.31	69.12	6.594	6.007	6.1318	1.0046	0.8397	0.7743
BAZ2A	50.38	44.51	43.05	5.6831	5.5081	5.4611	0.599	0.6227	0.4821
BAZ2B	19.58	4.32	7.63	4.3632	2.4114	3.1094	0.0111	-0.7244	-0.5424
BBC3	11.51	33.72	38.78	3.645	5.1177	5.314	-0.3088	0.4528	0.4181
BBIP1	10.04	8.87	6.41	3.4647	3.3031	2.8895	-0.3891	-0.3366	-0.6381
BBS1	9.38	23.49	23.34	3.3757	4.6141	4.6053	-0.4287	0.2338	0.1093
BBS10	22.18	22.39	12.76	4.5348	4.5478	3.7824	0.0875	0.2049	-0.2491
BBS12	6.54	4.55	7.53	2.9146	2.4725	3.0925	-0.6341	-0.6979	-0.5497
BBS2	46.47	46.03	32.59	5.5689	5.5555	5.07	0.5481	0.6433	0.3118
BBS4	31.69	25.4	30.49	5.0308	4.7225	4.9768	0.3084	0.2809	0.2712
BBS5	31.95	18.6	24.77	5.0422	4.2928	4.6876	0.3135	0.094	0.1452
BBS7	11.58	5.91	10.6	3.6531	2.7887	3.5361	-0.3052	-0.5603	-0.3565
BBS9	16.45	5.87	10.4	4.1252	2.7803	3.511	-0.095	-0.564	-0.3674
BBX	54.73	39.14	39.14	5.8004	5.327	5.327	0.6512	0.5439	0.4237
BCAM	22.24	31.55	15.24	4.5385	5.0246	4.0215	0.0892	0.4123	-0.145
BCAN	222.53	2.36	562.88	7.8043	1.7485	9.1392	1.5437	-1.0128	2.0845
BCAP29	57.99	25.95	30.55	5.8824	4.7522	4.9796	0.6877	0.2938	0.2724
BCAP31	399.57	167.97	280.48	8.6459	7.4006	8.1369	1.9186	1.4459	1.6478
BCAR1	29.06	29.37	59.73	4.9098	4.9246	5.9243	0.2545	0.3688	0.684
BCAR3	34.81	82.2	40.53	5.1623	6.3785	5.3761	0.367	1.0013	0.4451
BCAS2	92	64.53	69.64	6.5392	6.0341	6.1424	0.9802	0.8515	0.779
BCAS3	166.42	9.51	57.76	7.3873	3.3937	5.8768	1.358	-0.2971	0.6632
BCAS4	13.18	5.75	0.34	3.8258	2.7549	0.4222	-0.2283	-0.575	-1.713
BCAT1	0.45	1.56	0.06	0.5361	1.3561	0.0841	-1.6935	-1.1835	-1.8603
BCAT2	22.52	26.71	18.95	4.5558	4.7923	4.3183	0.0969	0.3113	-0.0157
BCCIP	37.85	45.01	20.89	5.2798	5.5239	4.4522	0.4193	0.6295	0.0426
BCDIN3D	4.64	1.49	5.29	2.4957	1.3161	2.6531	-0.8207	-1.2009	-0.7411
BCHE	98.21	14.39	462.19	6.6324	3.9439	8.8555	1.0218	-0.0578	1.9609
BCKDHA	42.66	15.08	30.32	5.4482	4.0072	4.969	0.4943	-0.0303	0.2678
BCKDHB	24.18	9.55	8.71	4.6542	3.3992	3.2795	0.1407	-0.2948	-0.4682
BCKDK	64.23	61.28	72.52	6.0275	5.9607	6.2001	0.7523	0.8195	0.8041
BCL10	9.42	33.52	21.3	3.3813	5.1094	4.479	-0.4263	0.4492	0.0543
BCL2	5.34	0.82	10.01	2.6645	0.8639	3.4607	-0.7455	-1.3976	-0.3893
BCL2A1	37.48	5.84	323.63	5.266	2.774	8.3427	0.4132	-0.5667	1.7375
BCL2L1	57.07	337.55	69.17	5.8597	8.4032	6.1328	0.6776	1.8821	0.7748
BCL2L11	33.63	4.29	13.17	5.114	2.4033	3.8248	0.3454	-0.728	-0.2307
BCL2L12	32.66	27.78	30.77	5.073	4.847	4.9896	0.3272	0.3351	0.2767
BCL2L13	125.96	73.13	90.59	6.9882	6.212	6.5171	1.1802	0.9289	0.9422
BCL2L2	27.36	26.57	39.3	4.8258	4.785	5.3327	0.2171	0.3081	0.4262
BCL3	13.01	35.35	30.9	3.8084	5.1839	4.9955	-0.236	0.4816	0.2793
BCL6	9.1	26.59	19.29	3.3363	4.7861	4.3427	-0.4463	0.3086	-0.0051
BCL7A	24.42	7.46	25.15	4.6679	3.0807	4.7087	0.1468	-0.4333	0.1544
BCL7B	62.64	59.02	74.17	5.9919	5.9074	6.2321	0.7365	0.7963	0.818
BCL7C	70.56	54.45	121.53	6.1611	5.7931	6.937	0.8118	0.7466	1.1251
BCL9	37.05	14.05	47.66	5.2498	3.9117	5.6047	0.406	-0.0718	0.5447
BCL9L	19.33	41.84	34.95	4.3455	5.4209	5.1679	0.0032	0.5847	0.3544
BCLAF1	82.83	90.54	46.7	6.3894	6.5163	5.5759	0.9135	1.0613	0.5322
BCO2	1.17	0.06	0.62	1.1177	0.0841	0.696	-1.4345	-1.7369	-1.5937
BCOR	35.95	17.95	36.97	5.2075	4.2441	5.2468	0.3871	0.0728	0.3888
BCORL1	9.22	1.67	7.17	3.3533	1.4168	3.0303	-0.4387	-1.1571	-0.5768
BCR	23.16	24.09	21.99	4.5945	4.649	4.5229	0.1141	0.249	0.0735
BCRP2	1.11	0.04	0.68	1.0772	0.0566	0.7485	-1.4525	-1.7488	-1.5708
BCS1L	50.88	30.53	51.35	5.6971	4.9787	5.7101	0.6052	0.3923	0.5906
BCYRN1	36.91	4.5	5.08	5.2445	2.4594	2.6041	0.4036	-0.7036	-0.7625
BDH1	13.45	9.6	2.7	3.853	3.406	1.8875	-0.2162	-0.2918	-1.0746
BDH2	31.54	12.75	49.1	5.0241	3.7814	5.6467	0.3054	-0.1285	0.563
BDKRB2	0.34	0.01	0.66	0.4222	0.0144	0.7312	-1.7442	-1.7672	-1.5784
BDNF	2.43	14.09	0.54	1.7782	3.9155	0.6229	-1.1403	-0.0701	-1.6255
BDNF-AS1	1.18	0.28	2.51	1.1243	0.3561	1.8115	-1.4315	-1.6185	-1.1078
BDP1	12.59	13.9	14.72	3.7645	3.8972	3.9745	-0.2556	-0.0781	-0.1655
BEAN1	0.26	0.65	3.04	0.3334	0.7225	2.0144	-1.7838	-1.4592	-1.0194
BECN1	129.09	61.93	124.1	7.0234	5.9757	6.9669	1.1959	0.8261	1.1381
BEGAIN	3.32	0.27	3.31	2.111	0.3448	2.1077	-0.992	-1.6235	-0.9787
BEND3	5.82	2.33	4.09	2.7698	1.7355	2.3477	-0.6986	-1.0185	-0.8742
BEND5	1.81	0	7.96	1.4906	0	3.1635	-1.2684	-1.7735	-0.5188
BEND6	3.66	4.7	3.53	2.2203	2.511	2.1795	-0.9434	-0.6811	-0.9474
BEND7	0.46	6.71	0.17	0.546	2.9467	0.2265	-1.6891	-0.4916	-1.7982
BEST1	61.88	0.44	27.56	5.9745	0.5261	4.8359	0.7287	-1.5446	0.2098
BET1	19.63	22.44	18.22	4.3667	4.5509	4.2645	0.0126	0.2063	-0.0391
BET1L	53.29	81.79	81.18	5.7626	6.3714	6.3607	0.6344	0.9982	0.8741
BEX1	4.11	295.89	0.91	2.3533	8.2138	0.9336	-0.8841	1.7997	-1.4902
BEX2	1.7	11.57	3	1.433	3.6519	2	-1.294	-0.1848	-1.0256
BEX4	0.3	73.85	38.01	0.3785	6.2259	5.2858	-1.7637	0.9349	0.4058
BFAR	99.54	71.43	90.68	6.6516	6.1785	6.5185	1.0303	0.9143	0.9428
BFSP1	43.34	1.06	2.32	5.4705	1.0426	1.7312	0.5043	-1.3199	-1.1427
BGN	22.36	0.51	259.44	4.546	0.5945	8.0248	0.0925	-1.5148	1.599
BHLHB9	2.05	1.21	1.05	1.6088	1.144	1.0356	-1.2157	-1.2758	-1.4457
BHLHE40	100.23	202.58	166.97	6.6615	7.6695	7.3921	1.0347	1.5629	1.3233
BHLHE41	42.77	12.96	3.15	5.4519	3.8032	2.0531	0.496	-0.119	-1.0025
BICC1	3.15	4.39	0.67	2.0531	2.4303	0.7398	-1.0178	-0.7162	-1.5746
BICD1	32.97	6.41	6.09	5.0862	2.8895	2.8258	0.3331	-0.5165	-0.6659
BICD2	32.03	56.97	25.02	5.0457	5.8572	4.7015	0.3151	0.7745	0.1513
BID	37.28	12.88	20.5	5.2585	3.7949	4.4263	0.4098	-0.1226	0.0313
BIK	1.64	1.01	0.18	1.4005	1.0072	0.2388	-1.3085	-1.3353	-1.7929
BIN1	60.06	28.74	65.12	5.9322	4.8943	6.047	0.7099	0.3557	0.7374
BIN3	173.22	32.57	128.32	7.4448	5.0691	7.0148	1.3836	0.4317	1.159
BIRC2	30.85	94.36	113.85	4.9932	6.5753	6.8436	0.2917	1.0869	1.0844
BIRC3	0.49	3.32	0.95	0.5753	2.111	0.9635	-1.676	-0.8551	-1.4772
BIRC5	86.01	59.75	60.78	6.4431	5.9248	5.9491	0.9374	0.8039	0.6947
BIRC6	18.06	16.8	18.16	4.2525	4.1538	4.26	-0.0382	0.0335	-0.0411
BIRC7	26.71	5.9	54.7	4.7923	2.7866	5.7996	0.2022	-0.5612	0.6296
BIVM	20.62	19.29	18.53	4.4343	4.3427	4.2876	0.0427	0.1157	-0.0291
BK250D10.8	0.88	0.06	0.97	0.9107	0.0841	0.9782	-1.5266	-1.7369	-1.4708
BLCAP	64.16	68.2	82.83	6.0259	6.1127	6.3894	0.7516	0.8857	0.8865
BLM	20.83	20.61	9.45	4.4482	4.4336	3.3854	0.0489	0.1552	-0.4221
BLMH	78.25	53.44	144.17	6.3083	5.7666	7.1816	0.8774	0.7351	1.2317
BLOC1S1	69.21	32.31	39.53	6.1336	5.0579	5.3409	0.7996	0.4268	0.4298
BLOC1S2	21.21	53.41	19.19	4.4731	5.7658	4.3356	0.06	0.7348	-0.0082
BLOC1S3	13.71	20.54	26.39	3.8787	4.4289	4.7756	-0.2047	0.1532	0.1835
BLVRA	69.02	64.06	66.55	6.1297	6.0237	6.0779	0.7979	0.8469	0.7508
BLVRB	211.42	171.38	159.63	7.7308	7.4294	7.3276	1.511	1.4585	1.2953
BLZF1	21.05	32.67	34.99	4.4627	5.0734	5.1695	0.0554	0.4336	0.3551
BMF	23.91	12.81	36.8	4.6387	3.7876	5.2403	0.1338	-0.1258	0.386
BMI1	3.62	2.08	4.54	2.2079	1.6229	2.4699	-0.9489	-1.0675	-0.8209
BMP1	41.06	31.28	164.64	5.3944	5.0126	7.3719	0.4703	0.4071	1.3146
BMP2K	14.79	17.08	22.62	3.9809	4.1763	4.5619	-0.1592	0.0433	0.0904
BMP4	0.37	6.89	9.42	0.4542	2.98	3.3813	-1.73	-0.4771	-0.4239
BMP6	2.36	0.1	0.4	1.7485	0.1375	0.4854	-1.1535	-1.7136	-1.6854
BMP8B	14.27	0.95	5.79	3.9326	0.9635	2.7634	-0.1807	-1.3543	-0.6931
BMPR1A	38.17	23.18	30.27	5.2917	4.5957	4.9667	0.4246	0.2258	0.2668
BMPR1B	0.77	0.09	1.05	0.8237	0.1243	1.0356	-1.5654	-1.7194	-1.4457
BMPR2	17.04	19.29	31.15	4.1731	4.3427	5.0067	-0.0736	0.1157	0.2842
BMS1	24.96	23.91	15.26	4.6982	4.6387	4.0233	0.1603	0.2444	-0.1442
BMS1P4	4.17	3.67	2.27	2.3702	2.2234	1.7093	-0.8766	-0.8062	-1.1523
BNC2	18.13	10.14	6.74	4.2578	3.4777	2.9523	-0.0359	-0.2606	-0.6108
BNIP1	19.82	16.84	19.59	4.3799	4.157	4.3639	0.0185	0.0349	0.0042
BNIP2	113.93	65.53	97.22	6.8446	6.0559	6.6179	1.1163	0.861	0.9861
BNIP3	111.57	124.27	90.66	6.8147	6.9689	6.5182	1.1029	1.2581	0.9427
BNIP3L	92.35	168	287.29	6.5446	7.4009	8.1714	0.9826	1.446	1.6628
BOC	1.32	5.29	4.43	1.2141	2.6531	2.441	-1.3915	-0.6193	-0.8335
BOD1	44.9	97.77	92.74	5.5204	6.626	6.5506	0.5265	1.109	0.9568
BOD1L	30.89	33.85	22.24	4.995	5.1231	4.5385	0.2925	0.4552	0.0802
BOK	4.87	25.71	0.85	2.5534	4.7393	0.8875	-0.795	0.2882	-1.5103
BOLA1	18.97	15.53	49.76	4.3198	4.047	5.6656	-0.0083	-0.0129	0.5712
BOLA3	108.68	103.91	107.73	6.7772	6.713	6.7646	1.0862	1.1468	1.05
BOLA3-AS1	2.24	3.45	9.82	1.696	2.1538	3.4356	-1.1769	-0.8365	-0.4002
BOP1	74.08	44.38	236.74	6.2304	5.504	7.8932	0.8427	0.6209	1.5417
BORA	18.45	13.67	7.02	4.2817	3.8748	3.0036	-0.0252	-0.0879	-0.5884
BPGM	31.77	16.84	27.69	5.0343	4.157	4.8425	0.31	0.0349	0.2127
BPHL	28.23	26.11	35.02	4.8694	4.7608	5.1707	0.2365	0.2975	0.3557
BPNT1	43.48	22.75	82.53	5.4751	4.5699	6.3842	0.5063	0.2145	0.8843
BPTF	27.85	21.16	36.8	4.8505	4.4699	5.2403	0.2281	0.171	0.386
BRAF	8.69	8.42	10.44	3.2765	3.2357	3.516	-0.4729	-0.3659	-0.3652
BRAP	27.44	21.46	22.39	4.8298	4.4893	4.5478	0.2189	0.1795	0.0843
BRAT1	58.5	58.07	48.66	5.8948	5.8844	5.634	0.6932	0.7863	0.5575
BRCA1	18.29	11.53	19.53	4.2698	3.6473	4.3597	-0.0305	-0.1868	0.0023
BRCA2	7.37	4.73	2.65	3.0652	2.5185	1.8679	-0.567	-0.6779	-1.0832
BRCC3	30.37	21.74	20.15	4.9713	4.5072	4.4026	0.2819	0.1872	0.021
BRD1	34.21	15.98	28.32	5.1379	4.0858	4.8738	0.3561	0.0039	0.2263
BRD2	24.99	21.37	31.09	4.6999	4.4835	5.0041	0.161	0.1769	0.283
BRD3	15.49	29.48	14.54	4.0435	4.9298	3.9579	-0.1313	0.3711	-0.1727
BRD4	27.93	26.08	42.92	4.8545	4.7592	5.4568	0.2299	0.2969	0.4803
BRD7	92.56	72.9	99.23	6.5478	6.2075	6.6472	0.9841	0.9269	0.9988
BRD8	27.96	36.52	34.86	4.856	5.2296	5.1643	0.2306	0.5015	0.3529
BRD9	45.21	17.31	53.22	5.5301	4.1946	5.7608	0.5308	0.0512	0.6127
BRE	47.29	43.89	40.95	5.5937	5.4883	5.3906	0.5591	0.6141	0.4514
BRF1	18.88	13.47	22.89	4.3132	3.855	4.5783	-0.0112	-0.0965	0.0976
BRF2	30.83	11.12	60.1	4.9923	3.5993	5.9331	0.2913	-0.2077	0.6878
BRI3	158.32	429.68	216.44	7.3158	8.7505	7.7645	1.3261	2.0331	1.4856
BRI3BP	26.92	12.24	19.57	4.8032	3.7268	4.3625	0.2071	-0.1522	0.0035
BRIP1	8.13	8.8	8.02	3.1906	3.2928	3.1731	-0.5112	-0.341	-0.5146
BRIX1	148.24	73	85.99	7.2215	6.2095	6.4428	1.2841	0.9278	0.9098
BRK1	149.35	307.55	306.69	7.2322	8.2694	8.2653	1.2889	1.8238	1.7038
BRMS1	76.38	200.09	88.86	6.2739	7.6517	6.4896	0.8621	1.5552	0.9302
BRMS1L	14.55	11.64	15.28	3.9588	3.6599	4.025	-0.169	-0.1813	-0.1435
BROX	31.04	48.62	84.14	5.0018	5.6328	6.4118	0.2955	0.6769	0.8963
BRP44	40.95	36.07	52.52	5.3906	5.2122	5.742	0.4687	0.4939	0.6045
BRP44L	82.53	50.68	54.22	6.3842	5.6915	5.7871	0.9112	0.7025	0.6242
BRPF1	16.96	25.18	24.31	4.1667	4.7104	4.6616	-0.0764	0.2756	0.1339
BRPF3	20.21	23.89	50.87	4.4067	4.6375	5.6968	0.0304	0.2439	0.5848
BRSK1	8.47	2.94	18.65	3.2434	1.9782	4.2965	-0.4877	-0.9129	-0.0252
BRSK2	0.45	0.11	0.6	0.5361	0.1506	0.6781	-1.6935	-1.708	-1.6015
BRWD1	10.97	7.38	7.9	3.5814	3.067	3.1538	-0.3372	-0.4393	-0.523
BRWD1-IT2	1.43	0.63	0.54	1.281	0.7049	0.6229	-1.3617	-1.4668	-1.6255
BRWD3	8.69	8.09	7.96	3.2765	3.1843	3.1635	-0.4729	-0.3882	-0.5188
BSCL2	6.85	2.15	5.87	2.9727	1.6554	2.7803	-0.6083	-1.0534	-0.6857
BSDC1	59.51	21.64	71.19	5.9191	4.5008	6.1737	0.7041	0.1845	0.7926
BSG	665.61	506.82	850.09	9.3807	8.9882	9.7332	2.2458	2.1365	2.3432
BSN	0.69	0.4	0.88	0.757	0.4854	0.9107	-1.5951	-1.5623	-1.5002
BST1	14.65	5.7	47.23	3.9681	2.7442	5.5919	-0.1649	-0.5797	0.5391
BST2	59.73	0.37	58.26	5.9243	0.4542	5.889	0.7064	-1.5759	0.6686
BTAF1	25.83	25.94	12.5	4.7458	4.7517	3.7549	0.1815	0.2936	-0.2611
BTBD1	135.75	110.53	131.38	7.0954	6.8013	7.0485	1.228	1.1852	1.1737
BTBD10	22.02	44.79	39.91	4.5248	5.517	5.3544	0.0831	0.6265	0.4357
BTBD19	6.43	9.91	6.76	2.8934	3.4476	2.9561	-0.6436	-0.2737	-0.6091
BTBD2	51.64	62.66	96.64	5.7181	5.9923	6.6094	0.6145	0.8333	0.9824
BTBD3	89.66	20.39	104.61	6.5024	4.4189	6.7226	0.9639	0.1488	1.0317
BTBD6	23	57.44	48.89	4.585	5.8689	5.6407	0.1098	0.7796	0.5604
BTBD7	13.25	13.97	15.69	3.8329	3.904	4.0609	-0.2251	-0.0752	-0.1278
BTBD8	1.14	1.6	0.65	1.0976	1.3785	0.7225	-1.4434	-1.1738	-1.5822
BTBD9	6.89	6.42	11.97	2.98	2.8914	3.6971	-0.605	-0.5156	-0.2863
BTD	31.22	14.22	22.52	5.0099	3.9279	4.5558	0.2991	-0.0648	0.0878
BTF3	673.36	1378.67	648.71	9.3974	10.4301	9.3437	2.2533	2.7638	2.1735
BTF3L4	27.18	39.34	37.61	4.8166	5.3341	5.2709	0.213	0.547	0.3993
BTG1	93.57	185.45	89.96	6.5633	7.5426	6.5072	0.991	1.5077	0.9379
BTG2	13.29	19.35	27.53	3.8369	4.347	4.8344	-0.2233	0.1175	0.2091
BTG3	130.67	70.47	78.86	7.0408	6.1593	6.3194	1.2036	0.9059	0.8561
BTK	1.04	0.08	3.44	1.0286	0.111	2.1506	-1.4742	-1.7252	-0.96
BTN2A1	37.02	47.34	66.85	5.2487	5.5951	6.0843	0.4055	0.6605	0.7536
BTN2A2	39.47	32.11	29.2	5.3388	5.0492	4.9165	0.4456	0.423	0.2449
BTN2A3P	4.77	5.81	4.26	2.5286	2.7677	2.3951	-0.8061	-0.5695	-0.8535
BTN3A1	8.26	14.4	19.41	3.211	3.9449	4.3512	-0.5021	-0.0574	-0.0014
BTN3A2	20.89	19.4	25.87	4.4522	4.3505	4.7479	0.0507	0.1191	0.1715
BTN3A3	5.61	20.05	11.25	2.7247	4.3957	3.6147	-0.7187	0.1388	-0.3222
BTRC	9.11	11.96	7.22	3.3377	3.696	3.0391	-0.4457	-0.1656	-0.5729
BUB1	63.12	53.18	36.79	6.0027	5.7597	5.2399	0.7413	0.7321	0.3858
BUB1B	72.98	35.75	27.94	6.2091	5.1997	4.855	0.8332	0.4885	0.2181
BUB3	87.2	159.07	51.34	6.4627	7.3226	5.7098	0.9462	1.412	0.5905
BUD13	19.6	11.7	23.03	4.3646	3.6668	4.5868	0.0117	-0.1784	0.1013
BUD31	114.43	93.95	115.34	6.8509	6.5691	6.8622	1.1191	1.0842	1.0925
BVES	37.12	7.46	9.71	5.2525	3.0807	3.4209	0.4071	-0.4333	-0.4066
BYSL	62.79	45.69	78.66	5.9953	5.545	6.3158	0.738	0.6387	0.8545
BZRAP1	0.12	4.9	0.54	0.1635	2.5607	0.6229	-1.8595	-0.6595	-1.6255
BZW1	271.54	603.31	224.25	8.0903	9.2391	7.8154	1.6711	2.2457	1.5078
BZW2	327.91	131.74	222.27	8.3615	7.0525	7.8026	1.7919	1.2945	1.5022
C10orf10	6.51	64.49	11.96	2.9088	6.0332	3.696	-0.6367	0.8511	-0.2868
C10orf11	23.36	13.46	7.01	4.6064	3.854	3.0018	0.1194	-0.0969	-0.5892
C10orf114	0.98	0.91	4.71	0.9855	0.9336	2.5135	-1.4933	-1.3673	-0.8019
C10orf116	0.7	2.89	1.01	0.7655	1.9598	1.0072	-1.5913	-0.9209	-1.4581
C10orf118	8.11	6.93	2.88	3.1875	2.9873	1.9561	-0.5126	-0.4739	-1.0448
C10orf12	4.52	3.12	1.44	2.4647	2.0426	1.2869	-0.8345	-0.8849	-1.3363
C10orf125	6.83	3.32	5.78	2.969	2.111	2.7613	-0.6099	-0.8551	-0.694
C10orf137	13.84	7.19	6.39	3.8914	3.0339	2.8856	-0.1991	-0.4537	-0.6398
C10orf140	0.27	0.2	0.49	0.3448	0.263	0.5753	-1.7787	-1.659	-1.6463
C10orf2	28.38	17.15	14.07	4.8768	4.1819	3.9136	0.2398	0.0457	-0.192
C10orf25	1.27	4.09	1.73	1.1827	2.3477	1.4489	-1.4055	-0.7522	-1.2657
C10orf26	19.94	22.69	18.86	4.3882	4.5662	4.3118	0.0222	0.2129	-0.0185
C10orf28	15.66	12.39	11.23	4.0583	3.7431	3.6124	-0.1247	-0.1452	-0.3232
C10orf32	9.79	20.1	10.4	3.4316	4.3992	3.511	-0.4038	0.1403	-0.3674
C10orf35	1.69	20.88	2.63	1.4276	4.4515	1.86	-1.2964	0.163	-1.0866
C10orf46	23.06	38.56	12.29	4.5886	5.306	3.7323	0.1114	0.5347	-0.271
C10orf47	4.81	22.18	6.52	2.5385	4.5348	2.9107	-0.8016	0.1993	-0.6289
C10orf54	2.56	4.13	0.69	1.8319	2.359	0.757	-1.1164	-0.7473	-1.5671
C10orf58	119.8	7.99	50.74	6.9165	3.1683	5.6932	1.1483	-0.3952	0.5833
C10orf76	17.75	16.01	15.32	4.2288	4.0883	4.0286	-0.0488	0.005	-0.1419
C10orf81	0.19	0.45	0.37	0.251	0.5361	0.4542	-1.8205	-1.5403	-1.699
C10orf88	8.22	9.01	7.03	3.2048	3.3234	3.0054	-0.5049	-0.3277	-0.5876
C10orf90	23.42	1.08	16.1	4.61	1.0566	4.0959	0.121	-1.3138	-0.1126
C11orf1	24.11	18.77	20.78	4.6502	4.3052	4.4449	0.1389	0.0994	0.0395
C11orf10	290.3	94.59	280.8	8.1864	6.5788	8.1385	1.7139	1.0884	1.6485
C11orf2	46.77	71.68	54.14	5.578	6.1835	5.785	0.5521	0.9165	0.6233
C11orf24	83.66	107.9	140.01	6.4036	6.7669	7.1397	0.9199	1.1702	1.2134
C11orf30	8.89	19.17	12.56	3.306	4.3341	3.7613	-0.4598	0.112	-0.2584
C11orf31	76.86	158.07	125.12	6.2828	7.3135	6.9787	0.866	1.408	1.1432
C11orf35	1.76	4.28	2.18	1.4647	2.4005	1.669	-1.2799	-0.7292	-1.1698
C11orf41	21.6	7.78	14.1	4.4983	3.1342	3.9165	0.0712	-0.41	-0.1907
C11orf45	1.13	6.62	0.74	1.0909	2.9298	0.7991	-1.4464	-0.499	-1.5488
C11orf46	27.96	29.39	45.15	4.856	4.9255	5.5283	0.2306	0.3692	0.5114
C11orf48	60.01	44.81	69.7	5.931	5.5176	6.1436	0.7093	0.6268	0.7795
C11orf49	22.03	9.56	17.32	4.5254	3.4005	4.1953	0.0833	-0.2942	-0.0693
C11orf51	18.82	36.35	22.93	4.3089	5.223	4.5807	-0.0131	0.4986	0.0986
C11orf54	10.78	11.93	9.27	3.5583	3.6927	3.3604	-0.3474	-0.1671	-0.433
C11orf57	21.73	14.57	36.83	4.5065	3.9607	5.2415	0.0749	-0.0505	0.3865
C11orf58	95.21	194.21	165.53	6.5881	7.6089	7.3796	1.002	1.5365	1.3179
C11orf61	7.85	4.53	10.62	3.1457	2.4673	3.5385	-0.5312	-0.7002	-0.3554
C11orf63	3.6	2.92	6.61	2.2016	1.9709	2.9279	-0.9517	-0.9161	-0.6214
C11orf67	34.77	57.7	64.65	5.1607	5.8753	6.0367	0.3663	0.7824	0.7329
C11orf68	27.72	289.9	104.02	4.844	8.1844	6.7145	0.2252	1.7869	1.0282
C11orf71	6.51	1.72	4.67	2.9088	1.4436	2.5033	-0.6367	-1.1455	-0.8064
C11orf73	39.62	70.8	46.44	5.3441	6.1659	5.568	0.448	0.9088	0.5287
C11orf74	27.77	33.82	37.01	4.8465	5.1218	5.2483	0.2263	0.4546	0.3894
C11orf75	5.16	12.33	2.44	2.6229	3.7366	1.7824	-0.764	-0.148	-1.1204
C11orf80	6	18.5	3.24	2.8074	4.2854	2.0841	-0.6819	0.0908	-0.989
C11orf82	16.51	18.53	11.34	4.1301	4.2876	3.6253	-0.0927	0.0917	-0.3176
C11orf83	23.09	10.35	17.88	4.5904	3.5046	4.2388	0.1122	-0.2489	-0.0503
C11orf84	30.6	34.49	56.81	4.9819	5.1493	5.8532	0.2866	0.4666	0.653
C11orf9	13.56	0.16	2.93	3.8639	0.2141	1.9745	-0.2113	-1.6803	-1.0367
C11orf91	0.42	2.61	3.23	0.5059	1.852	2.0807	-1.707	-0.9678	-0.9905
C11orf93	1.82	0.09	2.98	1.4957	0.1243	1.9928	-1.2661	-1.7194	-1.0288
C11orf95	12.11	12.4	30.92	3.7126	3.7442	4.9964	-0.2787	-0.1447	0.2797
C11orf96	20.47	1.08	7.71	4.4243	1.0566	3.1227	0.0383	-1.3138	-0.5366
C12orf10	73.29	84.27	54.79	6.2151	6.414	5.8019	0.8359	1.0167	0.6306
C12orf23	76.31	53.59	95.82	6.2726	5.7706	6.5972	0.8615	0.7368	0.9771
C12orf26	5.08	4.55	5.71	2.6041	2.4725	2.7463	-0.7724	-0.6979	-0.7005
C12orf29	26.1	22.72	12.98	4.7602	4.568	3.8053	0.1879	0.2137	-0.2392
C12orf32	50.84	37.46	57.11	5.696	5.2653	5.8607	0.6047	0.517	0.6562
C12orf34	17.9	2.66	22.71	4.2403	1.8718	4.5674	-0.0437	-0.9592	0.0928
C12orf35	17.17	17.19	18.99	4.1835	4.1851	4.3212	-0.069	0.0471	-0.0144
C12orf4	23.32	18.27	24	4.6041	4.2683	4.6439	0.1184	0.0833	0.1261
C12orf43	28.85	16.42	17.18	4.8997	4.1227	4.1843	0.25	0.02	-0.0741
C12orf44	110.85	67.01	116.29	6.8054	6.0877	6.8739	1.0988	0.8748	1.0976
C12orf45	39.43	52.17	32.6	5.3374	5.7325	5.0704	0.4449	0.7203	0.3119
C12orf47	27.04	12.21	18.51	4.8094	3.7236	4.2861	0.2098	-0.1536	-0.0297
C12orf49	56.13	64.54	46.7	5.8362	6.0343	5.5759	0.6671	0.8516	0.5322
C12orf5	18.7	14.74	11.85	4.3001	3.9764	3.6837	-0.017	-0.0437	-0.2922
C12orf51	12.39	9.38	12	3.7431	3.3757	3.7004	-0.2651	-0.305	-0.2849
C12orf52	55.68	56.87	39.31	5.8248	5.8547	5.3331	0.662	0.7735	0.4264
C12orf57	262.58	194.87	318.47	8.0421	7.6138	8.3195	1.6496	1.5386	1.7274
C12orf60	8.39	3.54	3.08	3.2311	2.1827	2.0286	-0.4932	-0.824	-1.0132
C12orf61	1.52	0.6	1.08	1.3334	0.6781	1.0566	-1.3384	-1.4785	-1.4366
C12orf65	18.42	13.29	12.83	4.2795	3.8369	3.7897	-0.0262	-0.1043	-0.246
C12orf66	14.75	8.43	6.23	3.9773	3.2373	2.854	-0.1608	-0.3652	-0.6536
C12orf68	0.83	0.07	1.29	0.8718	0.0976	1.1953	-1.544	-1.731	-1.3762
C12orf69	0.99	0.2	0.81	0.9928	0.263	0.856	-1.4901	-1.659	-1.524
C12orf73	15.78	7.07	8.46	4.0687	3.0126	3.2418	-0.1201	-0.4629	-0.4846
C12orf75	19.14	154.65	39.35	4.332	7.2822	5.3345	-0.0028	1.3944	0.427
C12orf76	12.17	10.84	9.37	3.7192	3.5656	3.3743	-0.2758	-0.2224	-0.4269
C14orf1	124.44	66.56	99.24	6.9709	6.0781	6.6473	1.1725	0.8706	0.9989
C14orf101	14.54	13.61	16.93	3.9579	3.8689	4.1643	-0.1694	-0.0904	-0.0828
C14orf102	11.57	7.49	11.34	3.6519	3.0858	3.6253	-0.3057	-0.4311	-0.3176
C14orf109	32.53	32.65	34.25	5.0674	5.0725	5.1396	0.3247	0.4332	0.3421
C14orf118	19.34	15.84	26.39	4.3462	4.0738	4.7756	0.0035	-0.0013	0.1835
C14orf119	43.35	88.94	53.88	5.4709	6.4909	5.7782	0.5044	1.0502	0.6203
C14orf126	22.75	21.62	26.72	4.5699	4.4995	4.7929	0.1031	0.1839	0.191
C14orf129	22.04	25.87	34.54	4.5261	4.7479	5.1514	0.0836	0.292	0.3472
C14orf132	0.96	16.82	13.11	0.9709	4.1554	3.8186	-1.4999	0.0342	-0.2334
C14orf133	26.14	9.02	28.74	4.7623	3.3248	4.8943	0.1888	-0.3271	0.2352
C14orf135	27.07	75.48	64.02	4.811	6.257	6.0228	0.2105	0.9484	0.7269
C14orf142	15.48	19.9	17.81	4.0426	4.3854	4.2334	-0.1317	0.1343	-0.0527
C14orf149	29.06	47.59	19.65	4.9098	5.6026	4.3681	0.2545	0.6638	0.006
C14orf159	14.62	15.78	8.98	3.9653	4.0687	3.319	-0.1661	-0.0035	-0.451
C14orf166	310.92	351.09	267.23	8.285	8.4598	8.0673	1.7578	1.9067	1.6175
C14orf167	15.07	18.67	26.84	4.0063	4.2979	4.7991	-0.1479	0.0962	0.1938
C14orf169	31.35	23.03	38.14	5.0157	4.5868	5.2906	0.3017	0.2219	0.4079
C14orf176	1.54	0.75	1.71	1.3448	0.8074	1.4383	-1.3333	-1.4222	-1.2703
C14orf182	0.88	0.82	0.23	0.9107	0.8639	0.2987	-1.5266	-1.3976	-1.7668
C14orf2	223.03	189.68	212.13	7.8075	7.575	7.7356	1.5452	1.5218	1.473
C14orf21	24.02	22.6	24.92	4.645	4.5607	4.696	0.1366	0.2105	0.1488
C14orf28	1.57	5.02	3.75	1.3618	2.5898	2.2479	-1.3257	-0.6469	-0.9176
C14orf37	4.63	8.72	4.14	2.4931	3.281	2.3618	-0.8218	-0.3462	-0.868
C14orf43	20.92	15.31	21.62	4.4542	4.0277	4.4995	0.0516	-0.0213	0.0633
C14orf45	2.4	1.94	2.39	1.7655	1.5558	1.7613	-1.1459	-1.0967	-1.1296
C14orf49	1.69	4.98	7.99	1.4276	2.5801	3.1683	-1.2964	-0.6511	-0.5167
C14orf79	7.57	14.74	8.89	3.0993	3.9764	3.306	-0.5519	-0.0437	-0.4567
C14orf80	15.14	15.35	12.37	4.0126	4.0312	3.7409	-0.1451	-0.0198	-0.2672
C14orf93	7.93	7.58	7.91	3.1587	3.101	3.1554	-0.5254	-0.4245	-0.5223
C15orf17	30.83	36.27	36.96	4.9923	5.2199	5.2464	0.2913	0.4973	0.3886
C15orf23	50.19	73.27	21.45	5.6778	6.2147	4.4886	0.5966	0.93	0.0585
C15orf24	259.96	108.21	245.01	8.0277	6.771	7.9426	1.6432	1.172	1.5632
C15orf29	26.01	27.46	19.81	4.7554	4.8309	4.3792	0.1858	0.328	0.0108
C15orf33	1.58	1.26	1.53	1.3674	1.1763	1.3391	-1.3233	-1.2617	-1.3135
C15orf34	0.57	0.34	5.79	0.6508	0.4222	2.7634	-1.6424	-1.5898	-0.6931
C15orf37	7.88	4.36	6.32	3.1506	2.4222	2.8718	-0.529	-0.7197	-0.6458
C15orf38	5.98	26.51	16.29	2.8032	4.7819	4.1119	-0.6837	0.3067	-0.1056
C15orf39	70.91	30.27	21.15	6.1681	4.9667	4.4692	0.815	0.3871	0.0501
C15orf40	19.08	25.98	14.64	4.3277	4.7538	3.9672	-0.0047	0.2945	-0.1687
C15orf41	16.28	11.7	25.49	4.111	3.6668	4.7274	-0.1012	-0.1784	0.1625
C15orf42	15.93	11.29	5.65	4.0815	3.6194	2.7334	-0.1144	-0.199	-0.7062
C15orf44	61.15	40.85	58.64	5.9577	5.3872	5.8982	0.7212	0.57	0.6726
C15orf52	13.61	116.12	45.01	3.8689	6.8718	5.5239	-0.2091	1.2159	0.5095
C15orf54	10.48	0.04	0.23	3.5211	0.0566	0.2987	-0.364	-1.7488	-1.7668
C15orf57	28.91	24.09	34.42	4.9026	4.649	5.1465	0.2513	0.249	0.3451
C15orf58	4.33	3.72	4.22	2.4141	2.2388	2.384	-0.857	-0.7995	-0.8583
C15orf59	3.97	3.43	10.05	2.3132	2.1473	3.466	-0.902	-0.8393	-0.387
C15orf61	13.61	11.01	14.7	3.8689	3.5862	3.9727	-0.2091	-0.2134	-0.1663
C15orf62	1.26	0.89	1.81	1.1763	0.9184	1.4906	-1.4083	-1.3739	-1.2476
C16orf13	122.58	129.92	82.4	6.9493	7.0325	6.382	1.1629	1.2858	0.8833
C16orf3	1.72	1.44	1.11	1.4436	1.2869	1.0772	-1.2893	-1.2136	-1.4276
C16orf42	86.58	101.13	109.21	6.4525	6.6743	6.7841	0.9416	1.13	1.0585
C16orf45	2.48	16.01	6.95	1.7991	4.0883	2.991	-1.131	0.005	-0.5939
C16orf46	4.66	0.99	1.78	2.5008	0.9928	1.4751	-0.8184	-1.3416	-1.2543
C16orf48	11.04	48.38	19.19	3.5898	5.6259	4.3356	-0.3334	0.6739	-0.0082
C16orf5	28.97	4.86	32.02	4.9054	2.5509	5.0453	0.2526	-0.6638	0.301
C16orf52	25.91	25.2	18.03	4.7501	4.7115	4.2502	0.1834	0.2761	-0.0454
C16orf53	22.57	19.45	26.25	4.5589	4.354	4.7682	0.0982	0.1206	0.1803
C16orf55	3.32	8.84	2.45	2.111	3.2987	1.7866	-0.992	-0.3385	-1.1186
C16orf57	53	37.85	36.57	5.7549	5.2798	5.2315	0.6309	0.5234	0.3821
C16orf58	86.76	51.51	98.02	6.4555	5.7145	6.6296	0.943	0.7125	0.9912
C16orf59	33.75	22.94	17.33	5.1189	4.5814	4.1961	0.3477	0.2195	-0.0689
C16orf62	40.38	44.84	49.6	5.3709	5.5185	5.6611	0.4599	0.6272	0.5693
C16orf7	14.46	17.26	14.53	3.9505	4.1906	3.957	-0.1728	0.0495	-0.1731
C16orf70	24.42	22.55	24.22	4.6679	4.5577	4.6565	0.1468	0.2092	0.1316
C16orf71	0.23	0.29	0.45	0.2987	0.3674	0.5361	-1.7993	-1.6136	-1.6634
C16orf72	41.97	41.29	49.37	5.4253	5.4022	5.6545	0.4841	0.5766	0.5664
C16orf74	16.89	32.11	24.79	4.1611	5.0492	4.6887	-0.079	0.423	0.1457
C16orf79	8.54	4.3	3.22	3.254	2.406	2.0772	-0.483	-0.7268	-0.992
C16orf80	119.86	50.89	88.92	6.9172	5.6974	6.4906	1.1486	0.705	0.9306
C16orf86	1.77	5.39	4.34	1.4699	2.6758	2.4168	-1.2776	-0.6094	-0.844
C16orf87	31.96	9.75	19.67	5.0426	3.4263	4.3695	0.3137	-0.283	0.0066
C16orf88	57.59	27.8	43.65	5.8726	4.848	5.4806	0.6833	0.3355	0.4906
C16orf91	12.88	7.82	11.41	3.7949	3.1408	3.6334	-0.242	-0.4072	-0.314
C16orf93	0.54	0.37	0.35	0.6229	0.4542	0.433	-1.6548	-1.5759	-1.7083
C16orf95	6.08	3.91	7.57	2.8237	2.2957	3.0993	-0.6746	-0.7748	-0.5467
C17orf100	6.94	1.08	2.83	2.9891	1.0566	1.9373	-0.6009	-1.3138	-1.0529
C17orf101	21.17	10.13	24.74	4.4705	3.4764	4.6859	0.0589	-0.2612	0.1445
C17orf103	9.46	12.21	10.54	3.3868	3.7236	3.5286	-0.4238	-0.1536	-0.3597
C17orf104	0.8	0.4	0.59	0.848	0.4854	0.669	-1.5546	-1.5623	-1.6055
C17orf107	0.36	0.44	0.17	0.4436	0.5261	0.2265	-1.7347	-1.5446	-1.7982
C17orf108	21.78	3.58	20.45	4.5097	2.1953	4.4229	0.0763	-0.8184	0.0299
C17orf109	0.18	0.28	2.54	0.2388	0.3561	1.8237	-1.8259	-1.6185	-1.1024
C17orf39	13.77	16.4	6.14	3.8846	4.121	2.8359	-0.2021	0.0193	-0.6615
C17orf48	8.21	14.72	8.95	3.2032	3.9745	3.3147	-0.5056	-0.0445	-0.4529
C17orf49	6.87	3.54	6.35	2.9764	2.1827	2.8777	-0.6066	-0.824	-0.6433
C17orf51	9.47	10.31	3.22	3.3882	3.4995	2.0772	-0.4232	-0.2511	-0.992
C17orf53	10.64	10.3	8.83	3.541	3.4983	3.2972	-0.3551	-0.2517	-0.4605
C17orf56	23	25.23	37.62	4.585	4.7131	5.2713	0.1098	0.2768	0.3995
C17orf57	2.14	2.49	2.71	1.6508	1.8032	1.8914	-1.197	-0.989	-1.0729
C17orf58	40.77	9.91	35.52	5.3844	3.4476	5.1906	0.4659	-0.2737	0.3643
C17orf59	14.74	18.6	9.37	3.9764	4.2928	3.3743	-0.1612	0.094	-0.4269
C17orf61	177.58	82.84	46.96	7.4804	6.3896	5.5838	1.3995	1.0061	0.5356
C17orf62	28.21	29.99	72.48	4.8684	4.9537	6.1993	0.2361	0.3815	0.8037
C17orf63	24.83	12.82	31.03	4.691	3.7887	5.0014	0.1571	-0.1253	0.2819
C17orf65	11.32	8.87	22.6	3.6229	3.3031	4.5607	-0.3186	-0.3366	0.0899
C17orf69	0.81	0.17	2.79	0.856	0.2265	1.9222	-1.551	-1.6749	-1.0595
C17orf70	30.48	25.58	47.09	4.9764	4.7323	5.5877	0.2842	0.2852	0.5373
C17orf72	0.04	0.45	0.36	0.0566	0.5361	0.4436	-1.9071	-1.5403	-1.7037
C17orf75	13.22	11.03	5.15	3.8298	3.5886	2.6206	-0.2265	-0.2124	-0.7553
C17orf76-AS1	523.63	1065.29	154.4	9.0352	10.0584	7.2798	2.0919	2.6021	1.2745
C17orf79	114.52	320.98	154.32	6.852	8.3308	7.2791	1.1196	1.8506	1.2741
C17orf80	29.06	16.41	56.1	4.9098	4.1218	5.8354	0.2545	0.0196	0.6452
C17orf81	45.36	28.5	21.33	5.5348	4.8826	4.4809	0.5329	0.3506	0.0551
C17orf82	1.32	1.53	2.56	1.2141	1.3391	1.8319	-1.3915	-1.1909	-1.0989
C17orf85	27.06	13.44	9.87	4.8104	3.852	3.4423	0.2103	-0.0978	-0.3973
C17orf89	171.05	167.3	259.57	7.4267	7.3949	8.0255	1.3755	1.4434	1.5993
C17orf90	49.75	46.99	71.05	5.6653	5.5847	6.1709	0.591	0.656	0.7914
C17orf96	10.22	3.85	20.9	3.488	2.278	4.4529	-0.3787	-0.7825	0.0429
C17orf97	2.36	19.04	1.57	1.7485	4.3248	1.3618	-1.1535	0.1079	-1.3037
C18orf1	6.89	0.12	0.86	2.98	0.1635	0.8953	-0.605	-1.7023	-1.5069
C18orf21	23.85	32.03	29.64	4.6352	5.0457	4.9373	0.1322	0.4215	0.254
C18orf25	22.45	23.88	24.98	4.5515	4.6369	4.6993	0.0949	0.2437	0.1503
C18orf32	6.01	4.45	8.94	2.8094	2.4463	3.3132	-0.681	-0.7093	-0.4535
C18orf54	4.97	8.34	6.04	2.5777	3.2234	2.8156	-0.7842	-0.3712	-0.6703
C18orf56	6.36	9.75	5.68	2.8797	3.4263	2.7398	-0.6497	-0.283	-0.7033
C18orf8	24.92	25.25	27.55	4.696	4.7142	4.8354	0.1593	0.2773	0.2096
C19orf10	389.72	177.27	271.7	8.61	7.4779	8.0912	1.9026	1.4796	1.6279
C19orf12	23.22	14.28	27.18	4.5981	3.9336	4.8166	0.1157	-0.0623	0.2014
C19orf24	86.63	79	120.37	6.4534	6.3219	6.9233	0.942	0.9767	1.1191
C19orf25	15.97	29.09	29.1	4.0849	4.9112	4.9117	-0.1129	0.363	0.2428
C19orf26	5.29	4.74	10.46	2.6531	2.5211	3.5185	-0.7506	-0.6768	-0.3641
C19orf29	15.02	18.6	26.99	4.0018	4.2928	4.8068	-0.1499	0.094	0.1971
C19orf29-AS1	0.43	0.4	0.9	0.516	0.4854	0.926	-1.7024	-1.5623	-1.4935
C19orf40	6.51	6.79	10.01	2.9088	2.9616	3.4607	-0.6367	-0.4851	-0.3893
C19orf42	56.36	55.07	98.79	5.842	5.8092	6.6408	0.6697	0.7536	0.9961
C19orf43	209.47	280.81	239.23	7.7175	8.1386	7.9083	1.505	1.767	1.5482
C19orf44	3.47	3.93	6.64	2.1603	2.3016	2.9336	-0.9701	-0.7722	-0.6189
C19orf47	21.89	15.79	21.47	4.5166	4.0695	4.4899	0.0794	-0.0031	0.0591
C19orf48	94.48	96.2	84.09	6.5771	6.6029	6.4109	0.9971	1.0989	0.8959
C19orf51	3.3	3.13	0.6	2.1043	2.0461	0.6781	-0.995	-0.8834	-1.6015
C19orf52	21.02	24.61	33.03	4.4607	4.6786	5.0887	0.0545	0.2618	0.3199
C19orf53	174.1	161.64	211.21	7.452	7.3455	7.7293	1.3868	1.422	1.4703
C19orf54	22.08	14.94	12.13	4.5286	3.9946	3.7148	0.0847	-0.0358	-0.2786
C19orf55	7.29	10.97	7.73	3.0514	3.5814	3.126	-0.5732	-0.2155	-0.5351
C19orf57	2.88	0.52	2.28	1.9561	0.6041	1.7137	-1.0611	-1.5107	-1.1504
C19orf6	116.72	137.71	175.24	6.8792	7.1159	7.4614	1.1317	1.3221	1.3536
C19orf60	62.24	59.47	144.82	5.9828	5.9181	7.188	0.7324	0.801	1.2345
C19orf63	229.68	55.06	119.12	7.8497	5.8089	6.9083	1.564	0.7535	1.1126
C19orf66	6.97	12.84	37.32	2.9946	3.7908	5.26	-0.5985	-0.1244	0.3946
C19orf70	76.05	104.11	157.69	6.2677	6.7158	7.3101	0.8593	1.148	1.2876
C19orf71	6.33	6.02	175.32	2.8738	2.8115	7.4621	-0.6523	-0.5504	1.3538
C19orf73	1.54	1.32	2.01	1.3448	1.2141	1.5898	-1.3333	-1.2453	-1.2043
C19orf76	4.9	1.84	1.01	2.5607	1.5059	1.0072	-0.7917	-1.1184	-1.4581
C19orf79	90.27	114.78	115.5	6.5121	6.8552	6.8642	0.9682	1.2087	1.0934
C1D	54.27	39.97	57.42	5.7884	5.3565	5.8684	0.6459	0.5567	0.6596
C1GALT1	20.23	19.46	18.59	4.408	4.3547	4.292	0.031	0.1209	-0.0271
C1GALT1C1	44.79	46.19	29.78	5.517	5.5604	4.9439	0.5249	0.6454	0.2568
C1QBP	530.34	306.63	139.5	9.0535	8.2651	7.1344	2.1001	1.822	1.2111
C1QL1	11.64	3.27	4.34	3.6599	2.0942	2.4168	-0.3022	-0.8624	-0.844
C1QL3	1.54	0.14	1.71	1.3448	0.189	1.4383	-1.3333	-1.6912	-1.2703
C1QTNF1	44.91	6.78	4.94	5.5207	2.9598	2.5705	0.5266	-0.4859	-0.7771
C1QTNF3	5.99	0.25	7.9	2.8053	0.3219	3.1538	-0.6828	-1.6334	-0.523
C1QTNF6	46.6	15.54	38.98	5.5729	4.0479	5.3212	0.5499	-0.0126	0.4212
C1QTNF9B-AS1	2.78	1.79	0.21	1.9184	1.4803	0.275	-1.0778	-1.1295	-1.7771
C1R	7.8	22.13	19.33	3.1375	4.5317	4.3455	-0.5348	0.1979	-0.0038
C1RL	7.31	12.44	1.61	3.0548	3.7485	1.384	-0.5717	-0.1428	-1.294
C1S	40.43	27.43	27.89	5.3726	4.8293	4.8525	0.4606	0.3274	0.217
C1orf109	19.08	6.71	17.53	4.3277	2.9467	4.2118	-0.0047	-0.4916	-0.0621
C1orf112	13.28	11.35	11.19	3.8359	3.6264	3.6076	-0.2238	-0.1959	-0.3253
C1orf114	8.98	3.63	5.48	3.319	2.211	2.696	-0.454	-0.8116	-0.7224
C1orf115	5.66	11.11	4.24	2.7355	3.5981	2.3896	-0.7139	-0.2082	-0.8559
C1orf116	1.99	0.1	1.62	1.5801	0.1375	1.3896	-1.2285	-1.7136	-1.2916
C1orf122	35.72	19.38	79.18	5.1985	4.3491	6.3252	0.3831	0.1185	0.8586
C1orf123	51.31	60.38	69.22	5.709	5.9397	6.1338	0.6105	0.8104	0.7752
C1orf124	15.14	9.33	18.2	4.0126	3.3688	4.263	-0.1451	-0.308	-0.0398
C1orf131	30.3	15.63	40.33	4.9681	4.0557	5.3691	0.2805	-0.0092	0.4421
C1orf133	5.22	21.57	0.38	2.6369	4.4963	0.4647	-0.7578	0.1825	-1.6945
C1orf135	13.77	1.7	6.08	3.8846	1.433	2.8237	-0.2021	-1.1501	-0.6668
C1orf144	164.07	41.95	139.94	7.3669	5.4246	7.1389	1.3489	0.5863	1.2131
C1orf159	19.28	8.94	19.04	4.342	3.3132	4.3248	0.0016	-0.3321	-0.0129
C1orf170	0.23	1	2.52	0.2987	1	1.8156	-1.7993	-1.3384	-1.106
C1orf174	44.53	22.11	45.82	5.5087	4.5304	5.5491	0.5213	0.1974	0.5205
C1orf182	1.25	1.18	0.6	1.1699	1.1243	0.6781	-1.4112	-1.2844	-1.6015
C1orf192	2.56	3.76	3.56	1.8319	2.251	2.189	-1.1164	-0.7943	-0.9433
C1orf198	68.12	24.8	85.09	6.111	4.6893	6.4278	0.7895	0.2665	0.9033
C1orf201	9	9.63	11.95	3.3219	3.4101	3.6949	-0.4527	-0.29	-0.2873
C1orf204	0.72	2.23	1.51	0.7824	1.6915	1.3277	-1.5838	-1.0376	-1.3185
C1orf21	44.96	10.76	54.51	5.5223	3.5558	5.7947	0.5273	-0.2266	0.6275
C1orf212	21.73	9.67	22.81	4.5065	3.4155	4.5735	0.0749	-0.2877	0.0955
C1orf213	1.5	0.86	1.11	1.3219	0.8953	1.0772	-1.3435	-1.384	-1.4276
C1orf216	38.99	15.19	53.7	5.3216	4.017	5.7735	0.4379	-0.026	0.6182
C1orf220	0.83	1.43	1.03	0.8718	1.281	1.0215	-1.544	-1.2162	-1.4519
C1orf226	2.48	8	0.22	1.7991	3.1699	0.2869	-1.131	-0.3945	-1.7719
C1orf228	0.93	1.48	1.29	0.9486	1.3103	1.1953	-1.5098	-1.2034	-1.3762
C1orf229	0.23	0.5	0.58	0.2987	0.585	0.6599	-1.7993	-1.519	-1.6094
C1orf233	18.75	8.75	30.08	4.3038	3.2854	4.9579	-0.0154	-0.3443	0.2629
C1orf27	25.41	23.17	36.18	4.723	4.5951	5.2165	0.1713	0.2255	0.3756
C1orf31	100.24	80.84	92.69	6.6616	6.3547	6.5498	1.0348	0.991	0.9564
C1orf35	35.99	28.66	52.52	5.2091	4.8904	5.742	0.3878	0.354	0.6045
C1orf38	5.5	4.08	4.4	2.7004	2.3448	2.433	-0.7295	-0.7534	-0.837
C1orf43	284.49	167.67	461.77	8.1573	7.3981	8.8542	1.7009	1.4448	1.9603
C1orf50	9.57	6.62	17.9	3.4019	2.9298	4.2403	-0.4171	-0.499	-0.0497
C1orf51	0.9	0.67	1.53	0.926	0.7398	1.3391	-1.5198	-1.4516	-1.3135
C1orf52	12.57	14.68	21.13	3.7623	3.9709	4.4679	-0.2565	-0.0461	0.0495
C1orf53	6.03	4.13	11.11	2.8135	2.359	3.5981	-0.6791	-0.7473	-0.3294
C1orf54	14.72	0.88	40.9	3.9745	0.9107	5.3889	-0.162	-1.3773	0.4507
C1orf55	46.16	19.94	37.66	5.5595	4.3882	5.2728	0.5439	0.1355	0.4001
C1orf56	8.53	5.42	4.95	3.2525	2.6826	2.5729	-0.4836	-0.6065	-0.7761
C1orf63	23.06	17.66	47.62	4.5886	4.2219	5.6035	0.1114	0.0631	0.5442
C1orf74	10.73	7.09	10.95	3.5521	3.0161	3.5789	-0.3502	-0.4614	-0.3378
C1orf85	162.39	134.22	302.95	7.3522	7.0792	8.2477	1.3423	1.3061	1.6961
C1orf86	33.43	17.03	43.1	5.1056	4.1723	5.4627	0.3417	0.0416	0.4828
C1orf88	0.28	2.04	1.58	0.3561	1.6041	1.3674	-1.7736	-1.0757	-1.3012
C1orf9	62.2	36.16	136.29	5.9819	5.2157	7.1011	0.732	0.4954	1.1966
C1orf96	22.48	6.16	11.75	4.5534	2.84	3.6724	0.0958	-0.538	-0.2971
C2	1.6	2.79	0.68	1.3785	1.9222	0.7485	-1.3183	-0.9373	-1.5708
C20orf11	50.75	26.26	46.65	5.6935	4.7687	5.5744	0.6036	0.301	0.5315
C20orf111	43	51.28	36.82	5.4594	5.7082	5.2411	0.4993	0.7097	0.3863
C20orf112	38.42	8.2	14.13	5.3009	3.2016	3.9193	0.4287	-0.3807	-0.1895
C20orf132	0.93	1.66	0.49	0.9486	1.4114	0.5753	-1.5098	-1.1595	-1.6463
C20orf194	15.76	10.65	20.12	4.067	3.5423	4.4005	-0.1209	-0.2325	0.0201
C20orf196	6	3.95	3.48	2.8074	2.3074	2.1635	-0.6819	-0.7697	-0.9544
C20orf20	49.57	49.12	52.6	5.6602	5.6473	5.7442	0.5887	0.6832	0.6055
C20orf24	83.87	55.41	49.29	6.4072	5.8179	5.6522	0.9214	0.7574	0.5654
C20orf27	95.39	61.83	114.67	6.5908	5.9734	6.8539	1.0032	0.8251	1.0889
C20orf29	25.24	18.28	31.78	4.7137	4.269	5.0347	0.1672	0.0836	0.2964
C20orf3	234.8	71.17	208.01	7.8814	6.1733	7.7074	1.5781	0.912	1.4607
C20orf30	250.4	224.1	290.65	7.9738	7.8144	8.1881	1.6192	1.6259	1.6701
C20orf4	58.89	30.41	65.99	5.9042	4.9732	6.0659	0.6974	0.3899	0.7456
C20orf43	203.27	127.12	205.33	7.6743	7.0014	7.6888	1.4858	1.2722	1.4526
C20orf7	23.82	9.19	14.22	4.6334	3.3491	3.9279	0.1314	-0.3166	-0.1858
C20orf72	55.8	62.54	57.42	5.8278	5.9896	5.8684	0.6634	0.8321	0.6596
C20orf94	4.94	2.93	2.92	2.5705	1.9745	1.9709	-0.7874	-0.9145	-1.0383
C20orf96	30.18	10.57	24.9	4.9625	3.5323	4.6949	0.278	-0.2368	0.1484
C21orf119	13.94	7.86	9.02	3.9011	3.1473	3.3248	-0.1947	-0.4043	-0.4485
C21orf15	3.16	0.02	1.52	2.0566	0.0286	1.3334	-1.0163	-1.761	-1.316
C21orf2	26.26	8.74	26.75	4.7687	3.2839	4.7944	0.1917	-0.3449	0.1917
C21orf33	140.57	108.9	106.43	7.1454	6.78	6.7473	1.2502	1.176	1.0424
C21orf56	8.73	9.01	23.76	3.2824	3.3234	4.6299	-0.4703	-0.3277	0.1201
C21orf58	12.26	4.81	6.4	3.729	2.5385	2.8875	-0.2714	-0.6692	-0.639
C21orf59	105.06	76.59	67.16	6.7287	6.2778	6.0909	1.0647	0.9575	0.7565
C21orf62	0.25	0.16	0.16	0.3219	0.2141	0.2141	-1.7889	-1.6803	-1.8036
C21orf63	1.2	5.58	2.14	1.1375	2.7181	1.6508	-1.4256	-0.591	-1.1778
C21orf67	3.66	0.28	7.5	2.2203	0.3561	3.0875	-0.9434	-1.6185	-0.5519
C21orf7	1.48	7.57	0.76	1.3103	3.0993	0.8156	-1.3487	-0.4252	-1.5416
C21orf91	18.35	8.39	19.83	4.2743	3.2311	4.3806	-0.0285	-0.3679	0.0114
C22orf13	131.56	79.51	96.91	7.0505	6.3311	6.6134	1.208	0.9807	0.9841
C22orf23	10.47	19.06	11.66	3.5198	4.3262	3.6622	-0.3646	0.1085	-0.3015
C22orf25	52.89	34.49	78.45	5.7519	5.1493	6.312	0.6296	0.4666	0.8528
C22orf26	1.81	0.68	0.84	1.4906	0.7485	0.8797	-1.2684	-1.4479	-1.5137
C22orf28	233.9	108.47	131.92	7.8759	6.7744	7.0544	1.5756	1.1735	1.1763
C22orf29	12.86	13.43	10.94	3.7929	3.851	3.5777	-0.243	-0.0982	-0.3383
C22orf32	57.54	41.97	34.34	5.8714	5.4253	5.1432	0.6828	0.5866	0.3437
C22orf39	24.87	20.25	26.96	4.6932	4.4094	4.8053	0.1581	0.1447	0.1965
C22orf40	20	15.15	24.43	4.3923	4.0135	4.6685	0.024	-0.0275	0.1368
C22orf43	0.24	1.06	0.66	0.3103	1.0426	0.7312	-1.794	-1.3199	-1.5784
C22orf46	12.61	10.98	23.29	3.7666	3.5826	4.6023	-0.2547	-0.215	0.108
C2CD2	13.2	13.52	1.14	3.8278	3.86	1.0976	-0.2274	-0.0943	-1.4187
C2CD2L	17.61	6.58	19.69	4.218	2.9222	4.3709	-0.0536	-0.5023	0.0072
C2CD3	9.02	10.32	9.06	3.3248	3.5008	3.3306	-0.4514	-0.2506	-0.446
C2CD4D	1.46	0.5	0.26	1.2987	0.585	0.3334	-1.3539	-1.519	-1.7517
C2orf15	1.29	0.38	0.92	1.1953	0.4647	0.9411	-1.3999	-1.5713	-1.4869
C2orf16	1.07	0.46	0.87	1.0496	0.546	0.903	-1.4648	-1.536	-1.5035
C2orf18	55.89	59.7	52.87	5.8301	5.9236	5.7514	0.6644	0.8034	0.6086
C2orf27A	0.53	1.87	1.65	0.6135	1.5211	1.406	-1.659	-1.1118	-1.2844
C2orf28	205.56	163.56	203.28	7.6904	7.3625	7.6744	1.493	1.4293	1.4463
C2orf29	81.72	64.07	84.95	6.3702	6.0239	6.4254	0.905	0.847	0.9022
C2orf42	8.17	7.76	12.54	3.1969	3.1309	3.7592	-0.5084	-0.4115	-0.2593
C2orf43	43.5	22.61	22.1	5.4757	4.5613	4.5298	0.5066	0.2108	0.0765
C2orf44	16.52	11.75	13.23	4.1309	3.6724	3.8309	-0.0924	-0.1759	-0.228
C2orf47	41.03	28.93	25.66	5.3933	4.9035	4.7366	0.4699	0.3597	0.1665
C2orf49	32.6	33.87	26.71	5.0704	5.1239	4.7923	0.326	0.4555	0.1908
C2orf55	0.17	0.33	0.33	0.2265	0.4114	0.4114	-1.8314	-1.5945	-1.7177
C2orf56	22.8	19.36	15.3	4.5729	4.3477	4.0268	0.1045	0.1178	-0.1427
C2orf63	1.35	0.65	1.04	1.2327	0.7225	1.0286	-1.3833	-1.4592	-1.4488
C2orf68	13.38	16.28	16.02	3.846	4.111	4.0892	-0.2193	0.0149	-0.1155
C2orf69	22.92	20.19	16.29	4.5801	4.4053	4.1119	0.1077	0.1429	-0.1056
C2orf72	2.33	0.05	2.23	1.7355	0.0704	1.6915	-1.1593	-1.7428	-1.16
C2orf74	40.83	7.23	55.93	5.3865	3.0409	5.8311	0.4668	-0.4506	0.6433
C2orf76	11.85	6.58	12.84	3.6837	2.9222	3.7908	-0.2916	-0.5023	-0.2455
C2orf81	2.01	0.89	6.82	1.5898	0.9184	2.9672	-1.2242	-1.3739	-0.6043
C2orf88	4.46	2	30.63	2.4489	1.585	4.9832	-0.8415	-1.084	0.274
C3	0.3	64.53	0.2	0.3785	6.0341	0.263	-1.7637	0.8515	-1.7823
C3AR1	5.12	1.29	1.37	2.6135	1.1953	1.2449	-0.7682	-1.2535	-1.3546
C3orf14	28.1	89.07	67.04	4.8629	6.493	6.0883	0.2337	1.0511	0.7554
C3orf17	21.63	29.85	27.05	4.5002	4.9472	4.8099	0.0721	0.3787	0.1985
C3orf18	0.36	0.73	17.78	0.4436	0.7908	4.2311	-1.7347	-1.4295	-0.0537
C3orf19	13.71	13.39	21.77	3.8787	3.847	4.5091	-0.2047	-0.1	0.0674
C3orf23	9.18	8.75	7.05	3.3477	3.2854	3.009	-0.4412	-0.3443	-0.5861
C3orf26	51.12	53.88	57.66	5.7038	5.7782	5.8743	0.6081	0.7402	0.6622
C3orf32	0.44	0.31	0.45	0.5261	0.3896	0.5361	-1.698	-1.604	-1.6634
C3orf33	7.57	5.13	4.39	3.0993	2.6159	2.4303	-0.5519	-0.6355	-0.8382
C3orf37	53.34	40.11	63.49	5.7639	5.3614	6.011	0.6349	0.5588	0.7217
C3orf38	14.38	24.6	28.89	3.943	4.6781	4.9016	-0.1761	0.2616	0.2384
C3orf39	20.68	17.35	45.6	4.4383	4.1977	5.5423	0.0445	0.0526	0.5175
C3orf52	5.64	8.51	2.44	2.7312	3.2494	1.7824	-0.7158	-0.3599	-1.1204
C3orf58	7.64	7.2	12.66	3.111	3.0356	3.7719	-0.5466	-0.4529	-0.2537
C3orf62	3.11	2.8	4.17	2.0391	1.926	2.3702	-1.0241	-0.9356	-0.8644
C3orf64	12.46	23.94	31.19	3.7506	4.6404	5.0085	-0.2618	0.2452	0.285
C3orf67	11.89	4.3	6.8	3.6882	2.406	2.9635	-0.2896	-0.7268	-0.6059
C3orf70	13.99	2.53	12.73	3.9059	1.8197	3.7793	-0.1926	-0.9819	-0.2505
C3orf71	1.34	1.38	3.24	1.2265	1.251	2.0841	-1.386	-1.2293	-0.989
C3orf75	38.99	36.28	53.59	5.3216	5.2203	5.7706	0.4379	0.4975	0.617
C3orf78	49.77	79.29	43.51	5.6659	6.3271	5.4761	0.5913	0.979	0.4887
C4orf19	10.63	0.4	5.98	3.5398	0.4854	2.8032	-0.3557	-1.5623	-0.6757
C4orf21	5.36	2.94	4.26	2.669	1.9782	2.3951	-0.7435	-0.9129	-0.8535
C4orf27	42.14	30.01	62.8	5.431	4.9547	5.9955	0.4866	0.3819	0.7149
C4orf29	6.12	2.64	4.08	2.8319	1.8639	2.3448	-0.671	-0.9626	-0.8754
C4orf3	58.79	43.86	114.78	5.9018	5.4874	6.8552	0.6964	0.6136	1.0895
C4orf32	1.83	3.54	38	1.5008	2.1827	5.2854	-1.2638	-0.824	0.4056
C4orf33	12.74	4.47	14.06	3.7803	2.4515	3.9126	-0.2485	-0.707	-0.1924
C4orf34	13.55	26.89	15.18	3.8629	4.8017	4.0161	-0.2117	0.3153	-0.1473
C4orf38	0.76	0.42	0.88	0.8156	0.5059	0.9107	-1.569	-1.5534	-1.5002
C4orf42	12.12	8.72	15.31	3.7137	3.281	4.0277	-0.2782	-0.3462	-0.1423
C4orf43	32.69	16.23	29.95	5.0742	4.1069	4.9519	0.3278	0.0131	0.2603
C4orf46	17.78	11.05	16.42	4.2311	3.591	4.1227	-0.0478	-0.2113	-0.1009
C4orf48	89.07	74.48	100.45	6.493	6.238	6.6646	0.9597	0.9402	1.0064
C4orf52	63.7	35.36	66.47	6.0157	5.1843	6.0762	0.7471	0.4818	0.7501
C5	1.42	3.54	0.8	1.275	2.1827	0.848	-1.3644	-0.824	-1.5275
C5orf15	176.71	88.31	209.35	7.4734	6.4807	7.7166	1.3963	1.0458	1.4647
C5orf22	56.83	26.52	34.97	5.8537	4.7824	5.1687	0.6749	0.307	0.3548
C5orf24	38.56	39.05	55.71	5.306	5.3237	5.8255	0.431	0.5425	0.6409
C5orf25	6.64	6.04	15.42	2.9336	2.8156	4.0374	-0.6257	-0.5486	-0.1381
C5orf28	14.88	10.89	18.57	3.9891	3.5717	4.2906	-0.1555	-0.2197	-0.0278
C5orf30	33.14	11.82	131.88	5.0934	3.6803	7.054	0.3363	-0.1725	1.1761
C5orf34	6.11	6.89	3.75	2.8298	2.98	2.2479	-0.6719	-0.4771	-0.9176
C5orf39	1.36	1.9	1.07	1.2388	1.5361	1.0496	-1.3805	-1.1052	-1.4396
C5orf4	25.09	6.68	22.58	4.7054	2.9411	4.5595	0.1635	-0.494	0.0894
C5orf41	3.59	9.56	10.22	2.1985	3.4005	3.488	-0.9531	-0.2942	-0.3774
C5orf42	8.54	5.37	6.59	3.254	2.6713	2.9241	-0.483	-0.6114	-0.6231
C5orf43	53.72	74.65	89.32	5.774	6.2413	6.497	0.6394	0.9416	0.9334
C5orf44	16.67	17.44	17.73	4.1432	4.2048	4.2273	-0.0869	0.0557	-0.0553
C5orf45	5.84	4.92	7.68	2.774	2.5656	3.1177	-0.6968	-0.6574	-0.5387
C5orf51	42.73	43.2	40.28	5.4506	5.466	5.3674	0.4954	0.6043	0.4413
C5orf54	4.65	18.68	3.36	2.4983	4.2987	2.1243	-0.8196	0.0965	-0.9715
C5orf55	7.62	5.32	4.87	3.1077	2.6599	2.5534	-0.5481	-0.6163	-0.7846
C5orf56	1.64	3.04	1.57	1.4005	2.0144	1.3618	-1.3085	-0.8972	-1.3037
C5orf62	6.77	18.13	8.2	2.9579	4.2578	3.2016	-0.6148	0.0787	-0.5022
C5orf63	3.22	0.38	1.28	2.0772	0.4647	1.189	-1.0071	-1.5713	-1.3789
C5orf65	0.19	0.2	1.28	0.251	0.263	1.189	-1.8205	-1.659	-1.3789
C6orf1	62.72	134.74	130.97	5.9937	7.0847	7.0441	0.7373	1.3085	1.1717
C6orf106	115.02	79.07	136.98	6.8582	6.3232	7.1083	1.1223	0.9772	1.1997
C6orf108	141.46	92.4	171.35	7.1544	6.5454	7.4292	1.2543	1.0739	1.3395
C6orf115	148.2	157.64	66.26	7.2211	7.3096	6.0717	1.284	1.4063	0.7481
C6orf120	47.08	33.78	17.62	5.5874	5.1202	4.2188	0.5563	0.4539	-0.059
C6orf130	33.09	55.26	32.49	5.0913	5.814	5.0657	0.3353	0.7557	0.3099
C6orf136	3.49	3.74	3.4	2.1667	2.2449	2.1375	-0.9672	-0.7969	-0.9657
C6orf162	4.34	7.94	4.91	2.4168	3.1603	2.5632	-0.8558	-0.3987	-0.7803
C6orf170	1.19	1.26	1.46	1.1309	1.1763	1.2987	-1.4286	-1.2617	-1.3312
C6orf174	0.2	1.89	0.8	0.263	1.5311	0.848	-1.8151	-1.1074	-1.5275
C6orf192	29.46	12.14	58.33	4.9288	3.7159	5.8907	0.263	-0.157	0.6693
C6orf203	21.92	21.4	15.41	4.5185	4.4854	4.0365	0.0803	0.1778	-0.1385
C6orf211	39.48	40.43	16.37	5.3391	5.3726	4.1185	0.4457	0.5637	-0.1027
C6orf223	3.24	1.84	3.51	2.0841	1.5059	2.1731	-1.004	-1.1184	-0.9502
C6orf225	18.21	7.79	7.12	4.2638	3.1359	3.0215	-0.0332	-0.4093	-0.5806
C6orf226	9.73	24.16	22.71	3.4236	4.6531	4.5674	-0.4074	0.2507	0.0928
C6orf228	33.42	44.23	40.32	5.1052	5.4992	5.3688	0.3415	0.6188	0.4419
C6orf47	4.78	7.35	11.49	2.5311	3.0618	3.6427	-0.805	-0.4415	-0.31
C6orf48	98.1	38.96	39.57	6.6308	5.3205	5.3423	1.021	0.541	0.4304
C6orf52	2.91	1.59	2	1.9672	1.373	1.585	-1.0561	-1.1762	-1.2064
C6orf57	17.3	7.25	6.65	4.1938	3.0444	2.9355	-0.0644	-0.4491	-0.6181
C6orf62	184.49	362.56	310.68	7.5352	8.506	8.2839	1.4239	1.9268	1.7119
C6orf70	23.42	19.8	10.75	4.61	4.3785	3.5546	0.121	0.1313	-0.3484
C6orf72	92.45	60.02	37.91	6.5461	5.9312	5.2821	0.9833	0.8067	0.4042
C6orf89	60.6	69.6	62.76	5.9449	6.1416	5.9946	0.7155	0.8982	0.7146
C6orf99	2.36	1.63	0	1.7485	1.3951	0	-1.1535	-1.1666	-1.8969
C7orf10	6.57	8.18	12.36	2.9203	3.1985	3.7398	-0.6316	-0.3821	-0.2677
C7orf11	92.23	83.89	70.97	6.5427	6.4075	6.1693	0.9818	1.0139	0.7907
C7orf13	1.94	3.53	2.06	1.5558	2.1795	1.6135	-1.2393	-0.8253	-1.194
C7orf23	32.14	28.32	41.98	5.0505	4.8738	5.4256	0.3172	0.3467	0.4667
C7orf25	20.84	28.1	24.95	4.4489	4.8629	4.6977	0.0492	0.342	0.1496
C7orf26	41.06	38.41	38.07	5.3944	5.3005	5.288	0.4703	0.5323	0.4067
C7orf31	7.43	9.83	9.88	3.0755	3.437	3.4436	-0.5625	-0.2783	-0.3967
C7orf41	35.94	26.94	10.1	5.2071	4.8043	3.4725	0.3869	0.3165	-0.3842
C7orf42	85.78	81.69	104.47	6.4393	6.3696	6.7207	0.9357	0.9974	1.0309
C7orf43	18.76	23.28	19.31	4.3045	4.6017	4.3441	-0.0151	0.2284	-0.0044
C7orf44	177.6	49.13	67.22	7.4806	5.6476	6.0921	1.3995	0.6833	0.757
C7orf46	5.26	0.84	0.19	2.6462	0.8797	0.251	-0.7537	-1.3908	-1.7876
C7orf49	51.54	38.98	54.57	5.7153	5.3212	5.7962	0.6133	0.5414	0.6281
C7orf50	145.95	171.96	60.22	7.1992	7.4343	5.9359	1.2742	1.4606	0.689
C7orf53	1.54	1.64	1.34	1.3448	1.4005	1.2265	-1.3333	-1.1642	-1.3626
C7orf55	25.99	6.17	14.81	4.7544	2.842	3.9828	0.1853	-0.5372	-0.1619
C7orf58	1.72	22.14	3.03	1.4436	4.5323	2.0108	-1.2893	0.1982	-1.0209
C7orf59	300.97	148.13	324.56	8.2383	7.2204	8.3468	1.737	1.3675	1.7393
C7orf60	14.95	12.19	13.58	3.9955	3.7214	3.8659	-0.1527	-0.1546	-0.2128
C7orf61	3.58	0.62	1.53	2.1953	0.696	1.3391	-0.9545	-1.4707	-1.3135
C7orf63	1.83	2.69	0.63	1.5008	1.8836	0.7049	-1.2638	-0.9541	-1.5898
C7orf70	26.03	19.76	33.5	4.7565	4.3757	5.1085	0.1862	0.1301	0.3286
C7orf73	64.1	74.35	75.71	6.0246	6.2355	6.2613	0.751	0.9391	0.8308
C8ORFK29	0.87	2.43	1.1	0.903	1.7782	1.0704	-1.5301	-0.9999	-1.4306
C8orf33	82.63	71.46	178.94	6.3859	6.1791	7.4914	0.912	0.9146	1.3666
C8orf37	3.52	4.79	5.23	2.1763	2.5336	2.6392	-0.963	-0.6713	-0.7472
C8orf38	17.05	12.22	31.02	4.1739	3.7247	5.0009	-0.0732	-0.1532	0.2817
C8orf39	2.53	1.93	3.25	1.8197	1.5509	2.0875	-1.1218	-1.0988	-0.9875
C8orf40	31.8	37.78	61.92	5.0356	5.2772	5.9754	0.3106	0.5222	0.7062
C8orf42	2.02	0.29	10.68	1.5945	0.3674	3.546	-1.2221	-1.6136	-0.3522
C8orf44	1.65	2.86	3.68	1.406	1.9486	2.2265	-1.3061	-0.9258	-0.927
C8orf45	0.44	0.3	0.33	0.5261	0.3785	0.4114	-1.698	-1.6088	-1.7177
C8orf46	4.13	3.16	16.34	2.359	2.0566	4.116	-0.8816	-0.8788	-0.1038
C8orf48	12.02	10.45	35.89	3.7027	3.5173	5.2052	-0.2831	-0.2434	0.3707
C8orf51	4.97	0.27	4.21	2.5777	0.3448	2.3813	-0.7842	-1.6235	-0.8595
C8orf55	22.77	10.3	61.12	4.5711	3.4983	5.957	0.1037	-0.2517	0.6982
C8orf58	16.16	19.97	55.34	4.101	4.3903	5.8161	-0.1057	0.1364	0.6368
C8orf59	55.72	78.01	93.03	5.8258	6.304	6.555	0.6625	0.9689	0.9587
C8orf73	4.15	3.21	7.63	2.3646	2.0738	3.1094	-0.8791	-0.8713	-0.5424
C8orf76	8.84	6.53	26.52	3.2987	2.9126	4.7824	-0.4631	-0.5064	0.1865
C8orf82	18.27	16.41	68.87	4.2683	4.1218	6.1266	-0.0312	0.0196	0.7721
C8orf83	17.57	18.48	44.23	4.2149	4.2839	5.4992	-0.055	0.0901	0.4988
C8orf84	0.19	0.24	0.74	0.251	0.3103	0.7991	-1.8205	-1.6385	-1.5488
C9orf100	5.83	6.7	3.35	2.7719	2.9449	2.121	-0.6977	-0.4924	-0.9729
C9orf102	5.85	7.12	2.82	2.7761	3.0215	1.9336	-0.6958	-0.4591	-1.0546
C9orf103	3.72	12.48	3.85	2.2388	3.7527	2.278	-0.9351	-0.141	-0.9045
C9orf114	18.08	27.5	13.89	4.254	4.8329	3.8963	-0.0376	0.3289	-0.1995
C9orf116	5.55	18.6	1.97	2.7115	4.2928	1.5705	-0.7246	0.094	-1.2128
C9orf117	0.87	1.8	0.75	0.903	1.4854	0.8074	-1.5301	-1.1273	-1.5452
C9orf123	32.22	39.26	15.02	5.054	5.3313	4.0018	0.3187	0.5457	-0.1536
C9orf125	43.41	0.14	13.21	5.4728	0.189	3.8288	0.5053	-1.6912	-0.2289
C9orf142	46.8	113.46	37.92	5.5789	6.8387	5.2824	0.5525	1.2015	0.4043
C9orf156	9.18	29.09	6.9	3.3477	4.9112	2.9819	-0.4412	0.363	-0.5979
C9orf16	81.14	159.82	66.75	6.36	7.3293	6.0821	0.9004	1.4149	0.7527
C9orf167	0.5	1.83	0.74	0.585	1.5008	0.7991	-1.6717	-1.1206	-1.5488
C9orf169	0.88	18.4	1.36	0.9107	4.278	1.2388	-1.5266	0.0875	-1.3572
C9orf172	0.67	1.63	1.32	0.7398	1.3951	1.2141	-1.6027	-1.1666	-1.368
C9orf21	6.44	59.05	21	2.8953	5.9081	4.4594	-0.6427	0.7967	0.0458
C9orf23	23.9	22.13	17.64	4.6381	4.5317	4.2203	0.1335	0.1979	-0.0584
C9orf25	37.39	16.64	22.73	5.2627	4.1408	4.5686	0.4117	0.0278	0.0934
C9orf3	6.8	5.24	4.77	2.9635	2.6415	2.5286	-0.6124	-0.6243	-0.7954
C9orf30	30.57	118.81	44.87	4.9805	6.9046	5.5195	0.286	1.2302	0.5076
C9orf30-TMEFF1	0.37	0.48	0.38	0.4542	0.5656	0.4647	-1.73	-1.5274	-1.6945
C9orf37	14.06	35.91	9.29	3.9126	5.2059	3.3632	-0.1896	0.4912	-0.4318
C9orf40	8.61	31.61	9.77	3.2645	5.0272	3.4289	-0.4783	0.4135	-0.4031
C9orf41	17.49	23.93	12.35	4.2087	4.6398	3.7388	-0.0578	0.2449	-0.2682
C9orf43	0.67	4.43	1.15	0.7398	2.441	1.1043	-1.6027	-0.7116	-1.4158
C9orf46	41.21	71.14	16.8	5.3995	6.1727	4.1538	0.4726	0.9118	-0.0874
C9orf5	39.87	82.13	29.81	5.353	6.3773	4.9453	0.4519	1.0008	0.2575
C9orf64	27.38	60.69	11.08	4.8268	5.947	3.5945	0.2176	0.8136	-0.331
C9orf68	0.21	0.23	0.3	0.275	0.2987	0.3785	-1.8098	-1.6435	-1.732
C9orf69	22.46	73.61	25.24	4.5521	6.2213	4.7137	0.0952	0.9329	0.1566
C9orf7	7.6	10.26	13.38	3.1043	3.4931	3.846	-0.5496	-0.2539	-0.2215
C9orf72	10	9.55	2.34	3.4594	3.3992	1.7398	-0.3915	-0.2948	-1.139
C9orf78	59.58	139.76	53.11	5.9208	7.1371	5.7578	0.7048	1.3313	0.6114
C9orf80	23.65	38.21	16.51	4.6235	5.2931	4.1301	0.127	0.5291	-0.0977
C9orf82	23.19	20	8.62	4.5963	4.3923	3.266	0.1149	0.1373	-0.4741
C9orf85	15.61	46.82	6.19	4.054	5.5795	2.846	-0.1267	0.6537	-0.6571
C9orf86	67.99	148.87	48.89	6.1083	7.2276	5.6407	0.7883	1.3707	0.5604
C9orf89	35.04	118.08	41.82	5.1715	6.8958	5.4202	0.3711	1.2263	0.4643
C9orf9	6.92	19.52	6.84	2.9855	4.359	2.9709	-0.6025	0.1228	-0.6027
C9orf91	24.76	19.12	17.18	4.6871	4.3306	4.1843	0.1553	0.1104	-0.0741
C9orf93	5.73	1.23	1.71	2.7506	1.157	1.4383	-0.7072	-1.2701	-1.2703
C9orf95	20.26	21.52	14.94	4.4101	4.4931	3.9946	0.0319	0.1811	-0.1567
C9orf96	1.21	0.39	0.25	1.144	0.4751	0.3219	-1.4227	-1.5668	-1.7567
CA11	27.6	1.94	10.15	4.8379	1.5558	3.479	0.2225	-1.0967	-0.3813
CA12	1.89	9.37	1.08	1.5311	3.3743	1.0566	-1.2503	-0.3056	-1.4366
CA13	0.95	2.25	0.52	0.9635	1.7004	0.6041	-1.5031	-1.0337	-1.6337
CA14	136.03	0.94	57.9	7.0983	0.9561	5.8802	1.2293	-1.3576	0.6647
CA5B	2.56	2.56	7.84	1.8319	1.8319	3.144	-1.1164	-0.9766	-0.5272
CA5BP1	20.84	12.52	20.64	4.4489	3.757	4.4356	0.0492	-0.1391	0.0354
CA8	2.35	0.2	0.27	1.7442	0.263	0.3448	-1.1554	-1.659	-1.7467
CAB39	78.79	138.41	70.58	6.3181	7.1232	6.1615	0.8818	1.3252	0.7873
CAB39L	8.75	5.56	11.21	3.2854	2.7137	3.61	-0.469	-0.593	-0.3243
CABIN1	54.34	20.47	26.94	5.7903	4.4243	4.8043	0.6467	0.1512	0.196
CABLES1	66.52	3.54	87.54	6.0772	2.1827	6.4683	0.7745	-0.824	0.9209
CABLES2	10.14	9.64	11.94	3.4777	3.4114	3.6938	-0.3833	-0.2894	-0.2878
CABP4	0.54	0.09	0.34	0.6229	0.1243	0.4222	-1.6548	-1.7194	-1.713
CABP7	0.41	0.42	0.16	0.4957	0.5059	0.2141	-1.7115	-1.5534	-1.8036
CABYR	2.52	8.73	4.8	1.8156	3.2824	2.5361	-1.1236	-0.3455	-0.7921
CACHD1	9.7	6.54	11.52	3.4195	2.9146	3.6462	-0.4092	-0.5056	-0.3085
CACNA1D	2.67	0.02	0.83	1.8758	0.0286	0.8718	-1.0968	-1.761	-1.5171
CACNA2D1	0.02	5.33	10.63	0.0286	2.6622	3.5398	-1.9195	-0.6154	-0.3548
CACNB1	5.68	6.22	7.75	2.7398	2.852	3.1293	-0.712	-0.5328	-0.5337
CACNB3	10.35	11.89	18.93	3.5046	3.6882	4.3169	-0.3713	-0.169	-0.0163
CACNB4	1.05	0.04	0.17	1.0356	0.0566	0.2265	-1.471	-1.7488	-1.7982
CACYBP	106.33	82.69	114	6.7459	6.387	6.8455	1.0723	1.005	1.0852
CAD	39.07	38.56	41.24	5.3245	5.306	5.4005	0.4392	0.5347	0.4558
CADM1	56.71	1.64	20.02	5.8507	1.4005	4.3937	0.6736	-1.1642	0.0171
CADM3	5.89	0.03	2.56	2.7845	0.0426	1.8319	-0.6921	-1.7549	-1.0989
CADM4	173.28	1.33	47.65	7.4453	1.2203	5.6044	1.3838	-1.2426	0.5446
CADPS	3.36	8.76	11.34	2.1243	3.2869	3.6253	-0.9861	-0.3436	-0.3176
CADPS2	2.87	1.42	4.19	1.9523	1.275	2.3757	-1.0627	-1.2188	-0.8619
CAHM	3.11	2.39	1.45	2.0391	1.7613	1.2928	-1.0241	-1.0073	-1.3337
CALCOCO1	43.04	86.19	71.36	5.4607	6.4461	6.1771	0.4999	1.0307	0.7941
CALCOCO2	52	74.71	94.3	5.7279	6.2424	6.5744	0.6189	0.9421	0.9671
CALCRL	0.14	0.01	0.6	0.189	0.0144	0.6781	-1.8481	-1.7672	-1.6015
CALD1	88.5	128.95	277.79	6.4838	7.0218	8.123	0.9556	1.2811	1.6418
CALHM2	7.17	2.49	8.55	3.0303	1.8032	3.2555	-0.5826	-0.989	-0.4787
CALM1	209.32	194.12	258.18	7.7164	7.6082	8.0178	1.5046	1.5362	1.5959
CALM2	870.19	1677.63	1214.16	9.7668	10.7131	10.2469	2.4178	2.8869	2.567
CALM3	378.1	235.88	313.49	8.5664	7.888	8.2969	1.8832	1.658	1.7175
CALML4	7.2	3.28	4.58	3.0356	2.0976	2.4803	-0.5802	-0.861	-0.8164
CALR	3218.12	688.97	2334.28	11.6525	9.4304	11.1894	3.2577	2.3289	2.9776
CALU	357.43	198.91	529.55	8.4855	7.6432	9.0513	1.8471	1.5515	2.0462
CAMK1	15.25	22.3	11.35	4.0224	4.5423	3.6264	-0.1407	0.2025	-0.3171
CAMK2A	0.95	0.93	1.41	0.9635	0.9486	1.269	-1.5031	-1.3608	-1.3441
CAMK2D	18.57	25.43	37.87	4.2906	4.7241	5.2806	-0.0213	0.2816	0.4035
CAMK2G	17.86	32.27	10.24	4.2373	5.0561	3.4906	-0.045	0.426	-0.3763
CAMK2N1	9.18	42.58	10.77	3.3477	5.4456	3.557	-0.4412	0.5955	-0.3473
CAMK2N2	1.45	6.86	3.95	1.2928	2.9745	2.3074	-1.3565	-0.4795	-0.8917
CAMK4	3.26	1.55	0.03	2.0909	1.3505	0.0426	-1.001	-1.186	-1.8783
CAMKK1	5.4	3.3	2.3	2.6781	2.1043	1.7225	-0.7395	-0.858	-1.1465
CAMKK2	24.04	12.87	28.91	4.6462	3.7939	4.9026	0.1371	-0.1231	0.2388
CAMKMT	16.4	4.09	6.57	4.121	2.3477	2.9203	-0.0968	-0.7522	-0.6247
CAMLG	22.96	38.03	34.73	4.5826	5.2865	5.1591	0.1088	0.5263	0.3506
CAMSAP1	19.44	29.31	14.31	4.3533	4.9217	3.9364	0.0067	0.3676	-0.1821
CAMSAP2	34.38	28.75	68.25	5.1449	4.8948	6.1137	0.3592	0.3559	0.7665
CAMTA1	12.74	1.63	6.9	3.7803	1.3951	2.9819	-0.2485	-1.1666	-0.5979
CAMTA2	24.02	29.52	18.37	4.645	4.9317	4.2758	0.1366	0.3719	-0.0342
CAND1	105.7	53.9	96.94	6.7374	5.7787	6.6138	1.0685	0.7404	0.9843
CAND2	1.05	2.66	10.73	1.0356	1.8718	3.5521	-1.471	-0.9592	-0.3495
CANT1	41.19	55.14	91.18	5.3988	5.811	6.5264	0.4723	0.7544	0.9462
CANX	906.51	361.06	894.82	9.8258	8.5001	9.8071	2.4441	1.9242	2.3754
CAP1	333.55	281.35	431.18	8.3861	8.1413	8.7555	1.8028	1.7682	1.9173
CAP2	1.32	93.31	73.82	1.2141	6.5593	6.2254	-1.3915	1.08	0.8151
CAPG	4.87	111.89	4.02	2.5534	6.8188	2.3277	-0.795	1.1928	-0.8829
CAPN1	95.6	128.63	149.52	6.594	7.0183	7.2338	1.0046	1.2796	1.2544
CAPN10	30.31	18.9	23.73	4.9686	4.3147	4.6282	0.2807	0.1035	0.1193
CAPN12	0.95	0.73	0.78	0.9635	0.7908	0.8319	-1.5031	-1.4295	-1.5345
CAPN2	153.82	645.91	308.65	7.2744	9.3374	8.2745	1.3077	2.2885	1.7078
CAPN3	446.69	6.58	27.23	8.8064	2.9222	4.8192	1.99	-0.5023	0.2025
CAPN5	28.39	42.77	34.03	4.8773	5.4519	5.1305	0.24	0.5982	0.3381
CAPN7	28.86	29.37	24.8	4.9001	4.9246	4.6893	0.2502	0.3688	0.1459
CAPNS1	510.24	653.5	543.12	8.9979	9.3542	9.0878	2.0753	2.2958	2.0621
CAPRIN1	123.81	139.02	175.04	6.9636	7.1295	7.4598	1.1693	1.328	1.3528
CAPRIN2	36.98	21.94	17.74	5.2472	4.5198	4.228	0.4048	0.1927	-0.055
CAPS	3.09	5.13	10.73	2.0321	2.6159	3.5521	-1.0272	-0.6355	-0.3495
CAPS2	2.41	1.27	0.68	1.7698	1.1827	0.7485	-1.144	-1.259	-1.5708
CAPZA1	143.53	274.21	207.57	7.1752	8.1044	7.7044	1.2635	1.7521	1.4594
CAPZA2	136.94	116.2	147.85	7.1079	6.8728	7.2177	1.2335	1.2163	1.2474
CAPZB	350.99	121.47	293.04	8.4594	6.9363	8.1999	1.8355	1.2439	1.6753
CARD10	37.18	57.87	6.31	5.2547	5.8795	2.8699	0.4082	0.7842	-0.6467
CARD14	8.08	0.75	4.09	3.1827	0.8074	2.3477	-0.5147	-1.4222	-0.8742
CARD16	13.06	28.08	34.35	3.8135	4.862	5.1436	-0.2338	0.3416	0.3439
CARD6	4.85	8.98	6.05	2.5484	3.319	2.8176	-0.7972	-0.3296	-0.6694
CARD8	11.87	9.39	15.08	3.6859	3.3771	4.0072	-0.2906	-0.3044	-0.1512
CARD9	0.16	0.56	0.33	0.2141	0.6415	0.4114	-1.8369	-1.4944	-1.7177
CARHSP1	34.84	70.26	29.37	5.1635	6.155	4.9246	0.3675	0.9041	0.2484
CARKD	62.95	44.32	52.74	5.9989	5.5021	5.7479	0.7396	0.62	0.6071
CARM1	59.59	79.14	76.55	5.921	6.3245	6.2771	0.7049	0.9778	0.8376
CARS	27.62	86.67	42.13	4.839	6.454	5.4306	0.223	1.0341	0.4689
CARS2	79.18	91.78	56.68	6.3252	6.5357	5.85	0.8849	1.0697	0.6516
CASC2	0.24	0.24	0.21	0.3103	0.3103	0.275	-1.794	-1.6385	-1.7771
CASC3	74.87	42.23	95.01	6.2455	5.434	6.5851	0.8494	0.5904	0.9718
CASC4	82.84	63.93	43.19	6.3896	6.0208	5.4656	0.9136	0.8457	0.4841
CASC5	13.01	12.69	6.68	3.8084	3.7751	2.9411	-0.236	-0.1312	-0.6157
CASD1	15.27	14.11	37.16	4.0241	3.9174	5.254	-0.1399	-0.0693	0.3919
CASK	27.79	8.28	15.14	4.8475	3.2141	4.0126	0.2268	-0.3753	-0.1489
CASKIN1	3.06	0.29	3.81	2.0215	0.3674	2.266	-1.0319	-1.6136	-0.9097
CASKIN2	15.94	14.13	26.56	4.0824	3.9193	4.7845	-0.114	-0.0685	0.1874
CASP1	4.78	29.35	13.04	2.5311	4.9236	3.8115	-0.805	0.3684	-0.2365
CASP10	0.36	0.96	3.46	0.4436	0.9709	2.157	-1.7347	-1.3511	-0.9572
CASP2	35.6	33.62	41.05	5.1938	5.1135	5.394	0.381	0.451	0.4529
CASP3	47.51	53.69	58.97	5.6002	5.7732	5.9062	0.562	0.738	0.676
CASP4	32.41	179.56	89.22	5.0622	7.4963	6.4954	0.3224	1.4876	0.9327
CASP6	17.52	12.03	13.98	4.211	3.7038	3.905	-0.0567	-0.1623	-0.1958
CASP7	13.85	20.58	11.01	3.8924	4.4316	3.5862	-0.1986	0.1544	-0.3346
CASP8	16.15	15.14	23.46	4.1001	4.0126	4.6124	-0.1061	-0.0279	0.1124
CASP8AP2	18.21	15.31	8.64	4.2638	4.0277	3.269	-0.0332	-0.0213	-0.4728
CASP9	20.02	3.84	10.6	4.3937	2.275	3.5361	0.0246	-0.7838	-0.3565
CASQ2	1.56	0.02	2.5	1.3561	0.0286	1.8074	-1.3283	-1.761	-1.1096
CAST	72.56	223.09	66.05	6.2008	7.8079	6.0672	0.8295	1.6231	0.7462
CASZ1	1.11	0.06	0.65	1.0772	0.0841	0.7225	-1.4525	-1.7369	-1.5822
CAT	120.41	58.52	118.01	6.9237	5.8953	6.8949	1.1515	0.7911	1.1068
CATSPER1	0.21	4.57	3.14	0.275	2.4777	2.0496	-1.8098	-0.6956	-1.004
CATSPER2	1.14	0.81	0.2	1.0976	0.856	0.263	-1.4434	-1.4011	-1.7823
CATSPER2P1	2.73	0.83	1.09	1.8992	0.8718	1.0635	-1.0864	-1.3942	-1.4336
CAV1	45.65	158.84	112.03	5.5438	7.3205	6.8206	0.5369	1.4111	1.0744
CAV2	29.72	84.14	34.94	4.9411	6.4118	5.1675	0.2685	1.0158	0.3543
CBFA2T2	18.16	8.29	15.73	4.26	3.2157	4.0644	-0.0349	-0.3746	-0.1263
CBFB	118.73	69.92	133.04	6.9036	6.1481	7.0665	1.1426	0.9011	1.1815
CBL	19.97	8.8	17.32	4.3903	3.2928	4.1953	0.0231	-0.341	-0.0693
CBLB	15.5	10.9	17.21	4.0444	3.5729	4.1867	-0.1309	-0.2192	-0.073
CBLL1	37.74	25.56	32.39	5.2758	4.7312	5.0613	0.4175	0.2847	0.308
CBLN3	1.59	2.63	1.66	1.373	1.86	1.4114	-1.3208	-0.9643	-1.282
CBR1	140.14	166.26	114.18	7.141	7.3859	6.8477	1.2483	1.4395	1.0862
CBR3	58.55	33.23	48.04	5.896	5.0972	5.6159	0.6938	0.4439	0.5496
CBR3-AS1	2.5	2.71	2.61	1.8074	1.8914	1.852	-1.1273	-0.9507	-1.0901
CBR4	14.14	4.91	16.23	3.9203	2.5632	4.1069	-0.1862	-0.6584	-0.1078
CBS	13.6	1.17	40.78	3.8679	1.1177	5.3847	-0.2095	-1.2872	0.4489
CBWD1	11.4	11.4	10.24	3.6323	3.6323	3.4906	-0.3145	-0.1934	-0.3763
CBWD2	9.27	13.5	11.91	3.3604	3.858	3.6904	-0.4356	-0.0952	-0.2892
CBWD3	0.27	0.5	0.1	0.3448	0.585	0.1375	-1.7787	-1.519	-1.837
CBWD6	2.8	1.92	1.18	1.926	1.546	1.1243	-1.0744	-1.1009	-1.4071
CBX1	111.16	84.66	214.33	6.8094	6.4205	7.7504	1.1006	1.0196	1.4795
CBX2	19.76	1.64	22.9	4.3757	1.4005	4.5789	0.0167	-1.1642	0.0978
CBX3	411.56	359.07	414.62	8.6885	8.4921	8.6991	1.9375	1.9208	1.8927
CBX3P2	1.47	0.94	1.18	1.3045	0.9561	1.1243	-1.3513	-1.3576	-1.4071
CBX4	88.31	24.81	186.47	6.4807	4.6899	7.5505	0.9542	0.2667	1.3924
CBX5	42.69	16.94	33.18	5.4492	4.1651	5.0951	0.4948	0.0384	0.3227
CBX6	76.25	47.3	44.37	6.2715	5.594	5.5037	0.861	0.66	0.5007
CBX7	5.52	7.57	4.74	2.7049	3.0993	2.5211	-0.7275	-0.4252	-0.7986
CBX8	28.86	9.54	31.77	4.9001	3.3978	5.0343	0.2502	-0.2954	0.2962
CBY1	43.85	35.94	48.99	5.487	5.2071	5.6436	0.5116	0.4917	0.5616
CC2D1A	32.57	22.65	28.88	5.0691	4.5638	4.9011	0.3255	0.2119	0.2382
CC2D1B	32.12	31.33	57.06	5.0496	5.0148	5.8595	0.3168	0.4081	0.6557
CC2D2A	9.31	12.55	18.39	3.366	3.7602	4.2772	-0.4331	-0.1377	-0.0336
CCAR1	61.55	71.73	54.42	5.9669	6.1845	5.7923	0.7254	0.9169	0.6264
CCBL1	6.84	11.73	2.13	2.9709	3.6702	1.6462	-0.6091	-0.1769	-1.1798
CCBL2	14	28.55	29.34	3.9069	4.8851	4.9231	-0.1922	0.3516	0.2478
CCDC101	19.09	17.76	16.08	4.3284	4.2296	4.0942	-0.0044	0.0665	-0.1133
CCDC102A	8.9	13.32	15.69	3.3074	3.84	4.0609	-0.4592	-0.103	-0.1278
CCDC102B	0.23	0.51	0.11	0.2987	0.5945	0.1506	-1.7993	-1.5148	-1.8313
CCDC103	2.96	4.16	2.99	1.9855	2.3674	1.9964	-1.0479	-0.7436	-1.0272
CCDC104	52.55	88.72	33.06	5.7428	6.4874	5.09	0.6255	1.0486	0.3205
CCDC106	16.44	7.04	27.5	4.1243	3.0072	4.8329	-0.0953	-0.4653	0.2085
CCDC107	5.6	11.68	4.86	2.7225	3.6645	2.5509	-0.7197	-0.1793	-0.7856
CCDC109B	7.84	18.19	2.45	3.144	4.2623	1.7866	-0.5319	0.0807	-1.1186
CCDC110	1.19	0.11	2.61	1.1309	0.1506	1.852	-1.4286	-1.708	-1.0901
CCDC111	17.15	6.03	17.96	4.1819	2.8135	4.2449	-0.0697	-0.5495	-0.0477
CCDC112	10.63	11.27	11.81	3.5398	3.6171	3.6792	-0.3557	-0.2	-0.2941
CCDC113	1.95	3.52	3.26	1.5607	2.1763	2.0909	-1.2371	-0.8267	-0.9861
CCDC114	0.6	0.3	0.78	0.6781	0.3785	0.8319	-1.6303	-1.6088	-1.5345
CCDC115	51.9	32.14	73.09	5.7252	5.0505	6.2112	0.6177	0.4236	0.8089
CCDC116	0.6	0.45	0.07	0.6781	0.5361	0.0976	-1.6303	-1.5403	-1.8544
CCDC117	27.41	30.04	21.05	4.8283	4.9561	4.4627	0.2182	0.3825	0.0472
CCDC12	45.9	67.96	75.99	5.5515	6.1077	6.2666	0.5403	0.8835	0.8331
CCDC120	5.19	0.11	6.57	2.6299	0.1506	2.9203	-0.7609	-1.708	-0.6247
CCDC121	6.2	1.83	5.71	2.848	1.5008	2.7463	-0.6638	-1.1206	-0.7005
CCDC122	5.72	4.01	6.14	2.7485	2.3248	2.8359	-0.7081	-0.7621	-0.6615
CCDC124	132.84	144.9	177.76	7.0644	7.1888	7.4819	1.2141	1.3538	1.3625
CCDC125	5.93	7.49	0.57	2.7929	3.0858	0.6508	-0.6884	-0.4311	-1.6134
CCDC126	11.62	9.57	12.31	3.6576	3.4019	3.7344	-0.3032	-0.2936	-0.27
CCDC127	31.85	29.63	32.26	5.0378	4.9369	5.0557	0.3115	0.3742	0.3055
CCDC13	0.59	0.07	0.25	0.669	0.0976	0.3219	-1.6343	-1.731	-1.7567
CCDC130	22.82	28.17	50.41	4.5741	4.8664	5.684	0.105	0.3435	0.5792
CCDC132	20.13	20.1	17.31	4.4012	4.3992	4.1946	0.028	0.1403	-0.0696
CCDC134	14.05	5.35	9.32	3.9117	2.6668	3.3674	-0.19	-0.6134	-0.43
CCDC136	10.48	6.39	4.75	3.5211	2.8856	2.5236	-0.364	-0.5182	-0.7975
CCDC137	64.29	37.95	66.55	6.0288	5.2836	6.0779	0.7529	0.525	0.7508
CCDC138	9.49	4.86	6.01	3.3909	2.5509	2.8094	-0.422	-0.6638	-0.673
CCDC14	39.72	39.56	48.14	5.3477	5.342	5.6188	0.4495	0.5504	0.5509
CCDC140	1.23	0.66	1.12	1.157	0.7312	1.0841	-1.4169	-1.4554	-1.4246
CCDC141	0	0.09	0.51	0	0.1243	0.5945	-1.9323	-1.7194	-1.6379
CCDC142	6.24	4.62	6.63	2.856	2.4906	2.9317	-0.6602	-0.69	-0.6198
CCDC144A	0.04	0.62	0.5	0.0566	0.696	0.585	-1.9071	-1.4707	-1.6421
CCDC144B	2.85	4.32	1.91	1.9449	2.4114	1.541	-1.066	-0.7244	-1.2256
CCDC146	11.72	0.7	6.52	3.669	0.7655	2.9107	-0.2981	-1.4404	-0.6289
CCDC147	0.39	0.77	0.05	0.4751	0.8237	0.0704	-1.7207	-1.4151	-1.8662
CCDC148	0.25	4.05	0.32	0.3219	2.3363	0.4005	-1.7889	-0.7571	-1.7224
CCDC149	1.77	5.76	20.56	1.4699	2.757	4.4303	-1.2776	-0.5741	0.0331
CCDC15	2.7	5.14	3.94	1.8875	2.6182	2.3045	-1.0916	-0.6345	-0.893
CCDC150	4.42	3.21	1.74	2.4383	2.0738	1.4542	-0.8463	-0.8713	-1.2634
CCDC154	0.17	1.5	1.43	0.2265	1.3219	1.281	-1.8314	-1.1984	-1.3389
CCDC157	1.58	0.63	1.39	1.3674	0.7049	1.257	-1.3233	-1.4668	-1.3493
CCDC159	10.72	3.75	23.97	3.5509	2.2479	4.6421	-0.3507	-0.7956	0.1254
CCDC163P	4.02	3.5	3.9	2.3277	2.1699	2.2928	-0.8955	-0.8295	-0.8981
CCDC165	3.45	16.59	6.15	2.1538	4.1367	2.8379	-0.973	0.0261	-0.6606
CCDC167	155.81	34.33	168.84	7.2929	5.1428	7.408	1.3159	0.4638	1.3303
CCDC17	0.4	1.1	0.61	0.4854	1.0704	0.6871	-1.7161	-1.3078	-1.5976
CCDC18	2.25	9.36	5.79	1.7004	3.373	2.7634	-1.1749	-0.3062	-0.6931
CCDC19	2.18	1.5	0.73	1.669	1.3219	0.7908	-1.1889	-1.1984	-1.5524
CCDC22	26.44	21.59	22.5	4.7782	4.4976	4.5546	0.1959	0.1831	0.0872
CCDC23	19.99	12.48	39.43	4.3916	3.7527	5.3374	0.0237	-0.141	0.4282
CCDC24	5.48	7.48	12.47	2.696	3.0841	3.7517	-0.7315	-0.4318	-0.2625
CCDC25	28.84	34.67	52.6	4.8992	5.1566	5.7442	0.2498	0.4698	0.6055
CCDC28A	17.81	23.57	13.91	4.2334	4.6188	3.8982	-0.0467	0.2358	-0.1987
CCDC28B	46.16	5.47	54.29	5.5595	2.6938	5.7889	0.5439	-0.6016	0.625
CCDC30	0.36	0.39	0.66	0.4436	0.4751	0.7312	-1.7347	-1.5668	-1.5784
CCDC34	13.95	10.19	9.24	3.9021	3.4841	3.3561	-0.1943	-0.2578	-0.4348
CCDC39	0.63	1.42	1.24	0.7049	1.275	1.1635	-1.6183	-1.2188	-1.39
CCDC40	1.11	0.89	3.7	1.0772	0.9184	2.2327	-1.4525	-1.3739	-0.9243
CCDC41	18.05	11.85	11.27	4.2517	3.6837	3.6171	-0.0386	-0.171	-0.3212
CCDC43	57.48	40.42	89.68	5.8699	5.3723	6.5027	0.6821	0.5636	0.9359
CCDC47	137.82	56.88	240.72	7.1171	5.855	7.9172	1.2376	0.7736	1.5521
CCDC50	36.4	61.36	41.74	5.225	5.9625	5.4175	0.3949	0.8203	0.4632
CCDC51	30.76	57.67	44.88	4.9891	5.8746	5.5198	0.2899	0.7821	0.5077
CCDC53	56.46	49.21	58.44	5.8445	5.6499	5.8934	0.6708	0.6843	0.6705
CCDC56	190.85	109.8	210.96	7.5838	6.7918	7.7276	1.4455	1.1811	1.4695
CCDC57	22.26	10.2	13.31	4.5398	3.4854	3.839	0.0897	-0.2572	-0.2245
CCDC58	53.63	53.52	56.28	5.7716	5.7687	5.84	0.6384	0.736	0.6472
CCDC59	54.77	38.89	40.14	5.8014	5.318	5.3625	0.6516	0.5399	0.4392
CCDC6	22.65	38.45	19.04	4.5638	5.302	4.3248	0.1004	0.533	-0.0129
CCDC61	13.16	5.79	10.6	3.8237	2.7634	3.5361	-0.2292	-0.5713	-0.3565
CCDC62	0.31	0.25	0.14	0.3896	0.3219	0.189	-1.7588	-1.6334	-1.8146
CCDC64	2.56	0.19	0.6	1.8319	0.251	0.6781	-1.1164	-1.6643	-1.6015
CCDC66	6.77	16.82	9.39	2.9579	4.1554	3.3771	-0.6148	0.0342	-0.4257
CCDC69	1.57	2.97	0.21	1.3618	1.9891	0.275	-1.3257	-0.9081	-1.7771
CCDC7	0.4	1.58	1.3	0.4854	1.3674	1.2016	-1.7161	-1.1786	-1.3734
CCDC71	25.16	24.23	43.71	4.7093	4.6571	5.4825	0.1652	0.2524	0.4915
CCDC71L	35.68	21.9	25.45	5.1969	4.5173	4.7252	0.3824	0.1916	0.1616
CCDC72	576.82	587.68	576.6	9.1745	9.2013	9.1739	2.154	2.2293	2.0996
CCDC73	0.79	0.78	1.04	0.84	0.8319	1.0286	-1.5582	-1.4116	-1.4488
CCDC74A	0.77	29.66	39.29	0.8237	4.9383	5.3323	-1.5654	0.3748	0.4261
CCDC74B	1.63	3.06	5.29	1.3951	2.0215	2.6531	-1.3109	-0.8941	-0.7411
CCDC75	20.62	24.2	17.45	4.4343	4.6554	4.2055	0.0427	0.2517	-0.0648
CCDC76	12.97	9.52	12.14	3.8043	3.3951	3.7159	-0.2379	-0.2965	-0.2781
CCDC77	15.67	12.37	11.6	4.0592	3.7409	3.6554	-0.1243	-0.1461	-0.3045
CCDC78	5.94	8	12.97	2.7949	3.1699	3.8043	-0.6874	-0.3945	-0.2396
CCDC8	14.46	0.62	31.34	3.9505	0.696	5.0152	-0.1728	-1.4707	0.2879
CCDC80	6.79	47.55	32.79	2.9616	5.6014	5.0785	-0.6132	0.6632	0.3155
CCDC82	33.87	53.67	52	5.1239	5.7727	5.7279	0.3499	0.7378	0.5984
CCDC84	9.88	11.2	9.27	3.4436	3.6088	3.3604	-0.3985	-0.2036	-0.433
[truncated: 11,891 more rows]
