# Supplementary material
Source: Research Square preprint supplement (doi:10.21203/rs.3.rs-9577216/v1)
Supplement: Supplementary file 4 [file 4fd2c55abfde2ec224e5ffe5.xlsx]

## Sheet: INDEX
Supplementary Table 5. Melanoma transcriptional cell-state signatures across PDX models
Gene-level z-scores for 13 melanoma cell-state signatures (Tsoi et al. 2018; Belote et al. 2021) across MM27, MM13 and MM16 PDX models. Signature-level mean scores, ranked activity, and MITF–AXL index are also included.
Sheet	Description	Source	Notes
Signature_Heatmap	Gene-level log₂(TPM+1) and cross-sample z-scores for all signature genes	Tsoi et al. 2018; Belote et al. 2021	13 signatures, 580 gene entries. Genes clustered within each signature by Spearman correlation distance, average linkage (UPGMA). Cross-sample z-scores calculated gene-wise across MM27, MM13 and MM16 (population SD).
Signature_Ranks	Mean signature score and rank per PDX model	Computed from z-scores	Rank 1 = highest mean z-score. Scores computed across all 580 signature genes.
MITF_AXL_Values	log₂(TPM+1) expression of MITF and AXL per PDX	Tsoi et al. 2018 framework	Used to compute MITF–AXL index
MITF_AXL_Index	MITF–AXL index per PDX (log₂(TPM+1)_MITF − log₂(TPM+1)_AXL)	Computed	Positive = MITF-enriched; Negative = AXL-enriched

## Sheet: Signature_Heatmap
Melanoma cell-state signature genes | log₂(TPM+1) and cross-sample z-scores | MM27, MM13, MM16
Cross-sample z-scores (row z-scores) calculated gene-wise across MM27, MM13 and MM16 using population SD. Genes are ordered by unsupervised hierarchical clustering using Spearman correlation distance (1−ρ) and average linkage (UPGMA).
Signature	Gene	MM27 log₂(TPM+1)	MM13 log₂(TPM+1)	MM16 log₂(TPM+1)	MM27 z-score	MM13 z-score	MM16 z-score
ADT (Belote, 2021)	MAP6	0.2265	0.2987	1.157	-0.7907	-0.62	1.4108
ADT (Belote, 2021)	CEBPD	4.8723	5.6685	4.5916	-0.3766	1.3688	-0.9922
ADT (Belote, 2021)	S100A6	10.1486	12.9601	10.463	-0.8284	1.4068	-0.5784
ADT (Belote, 2021)	DAZAP2	8.2485	8.0793	7.8437	1.1527	0.1333	-1.2859
ADT (Belote, 2021)	LGALS3	8.8682	8.2313	10.1364	-0.2657	-1.0701	1.3358
ADT (Belote, 2021)	FSTL4	0.8953	0.0841	0.757	0.8932	-1.3962	0.503
NEO (Belote, 2021)	TMEM120A	5.4588	5.6848	6.0079	-1.1467	-0.1435	1.2902
NEO (Belote, 2021)	YIPF1	4.5945	5.5132	5.8017	-1.3767	0.4081	0.9686
NEO (Belote, 2021)	SERPINF1	7.1054	7.5871	8.6935	-1.0377	-0.3132	1.3509
NEO (Belote, 2021)	SRA1	5.0721	5.4637	5.5248	-1.4032	0.5492	0.854
NEO (Belote, 2021)	SWI5	5.5686	5.9435	5.3743	-0.2547	1.3321	-1.0773
NEO (Belote, 2021)	RSU1	5.4236	6.471	6.2426	-1.3835	0.9457	0.4378
NEO (Belote, 2021)	MFF	6.497	6.2785	6.2038	1.371	-0.385	-0.986
NEO (Belote, 2021)	PRMT2	5.6147	4.8415	5.9411	0.323	-1.3539	1.0309
NEO (Belote, 2021)	PIGH	5.4893	4.6542	5.4545	0.7517	-1.4133	0.6615
FET (Belote, 2021)	MICAL3	4.8782	4.9741	5.3477	-0.9304	-0.4572	1.3876
FET (Belote, 2021)	CELF6	1.1375	1.8875	2.4594	-1.2759	0.1097	1.1662
FET (Belote, 2021)	COL1A2	0.5261	0.546	8.0977	-0.7099	-0.7043	1.4142
FET (Belote, 2021)	GTPBP2	6.3911	6.6713	6.8077	-1.3393	0.2763	1.063
FET (Belote, 2021)	KLHL24	3.5777	4.2265	4.6011	-1.3184	0.2162	1.1023
FET (Belote, 2021)	LYPD1	0.9486	1.4114	2.121	-1.1305	-0.1706	1.3011
FET (Belote, 2021)	ITGB5	7.477	7.5207	8.4847	-0.7535	-0.6597	1.4132
FET (Belote, 2021)	NOTCH2NL	4.8699	6.1252	4.4416	-0.3859	1.3712	-0.9853
FET (Belote, 2021)	C14orf132	0.9709	4.1554	3.8186	-1.4076	0.8217	0.5859
FET (Belote, 2021)	ZNF582	1.2265	0.8237	0.6599	1.3573	-0.3346	-1.0227
FET (Belote, 2021)	CHD3	7.4237	7.0691	7.4372	0.667	-1.4135	0.7465
FET (Belote, 2021)	RADIL	1.5361	0.0841	0.9782	1.1202	-1.3077	0.1874
Melanocytic (Tsoi, 2018)	DNAJA4	1.9709	4.3604	5.4316	-1.348	0.3038	1.0443
Melanocytic (Tsoi, 2018)	EPHA5	0.7225	1.1375	1.9928	-1.0622	-0.2775	1.3397
Melanocytic (Tsoi, 2018)	FAM83H	1.0772	2.406	5.1189	-1.0643	-0.2743	1.3386
Melanocytic (Tsoi, 2018)	GOLGA7B	2.5008	2.8197	3.1651	-1.2081	-0.0327	1.2407
Melanocytic (Tsoi, 2018)	LXN	0	3.9782	4.7098	-1.3994	0.5229	0.8765
Melanocytic (Tsoi, 2018)	SLAMF7	0.433	0.5558	0.9486	-0.9678	-0.4091	1.3769
Melanocytic (Tsoi, 2018)	TSPAN10	3.7398	4.9284	5.814	-1.2798	0.1188	1.161
Melanocytic (Tsoi, 2018)	CDH3	1.585	2.4854	6.7083	-0.8991	-0.4959	1.3949
Melanocytic (Tsoi, 2018)	CAPG	2.5534	6.8188	2.3277	-0.6518	1.4128	-0.761
Melanocytic (Tsoi, 2018)	KCP	0.0841	1.4005	0.5753	-1.1093	1.3143	-0.205
Melanocytic (Tsoi, 2018)	FYB	3.6017	2.8777	0.1243	0.9348	0.4516	-1.3864
Melanocytic (Tsoi, 2018)	ADAM23	6.334	3.6229	7.4144	0.3408	-1.3591	1.0182
Melanocytic (Tsoi, 2018)	ANKRD30B	0.7908	0.5656	0.6599	1.2853	-1.1535	-0.1318
Transitory-Melanocytic (Tsoi, 2018)	SLC27A3	2.852	3.0339	3.8679	-0.9027	-0.4915	1.3941
Transitory-Melanocytic (Tsoi, 2018)	PFKFB2	3.1811	4.1094	5.1643	-1.1979	-0.0521	1.25
Transitory-Melanocytic (Tsoi, 2018)	OGDHL	0.9928	1.433	0.0566	0.2881	1.055	-1.3431
Transitory-Melanocytic (Tsoi, 2018)	ATP6V0A4	4.0875	2.0841	1.844	1.4075	-0.5844	-0.8231
Transitory-Melanocytic (Tsoi, 2018)	HTR2B	1.0496	0.4647	7.5161	-0.6136	-0.7967	1.4103
Transitory-Melanocytic (Tsoi, 2018)	ACP5	7.105	1.8156	6.1729	0.8996	-1.3948	0.4953
Neural crest-like-Transitory (Tsoi, 2018)	PRICKLE2	2.3277	2.3951	2.6439	-0.9402	-0.4447	1.385
Neural crest-like-Transitory (Tsoi, 2018)	CRIP2	6.557	7.2826	7.7276	-1.3101	0.1938	1.1163
Neural crest-like-Transitory (Tsoi, 2018)	ALDH1A3	4.8649	7.4275	6.3352	-1.2803	1.1603	0.12
Neural crest-like-Transitory (Tsoi, 2018)	COL4A1	7.0168	4.8099	3.1342	1.2766	-0.1114	-1.1653
Neural crest-like-Transitory (Tsoi, 2018)	AGMO	2.4033	0.0976	4.2824	0.0831	-1.2642	1.1811
Neural crest-like-Transitory (Tsoi, 2018)	CADM4	7.4453	1.2203	5.6044	1.0297	-1.3544	0.3247
Neural crest-like (Tsoi, 2018)	FEZ1	2.8339	3.5583	5.1194	-1.052	-0.2925	1.3445
Neural crest-like (Tsoi, 2018)	MAP1LC3A	2.2987	3.2016	5.8209	-0.9875	-0.383	1.3705
Neural crest-like (Tsoi, 2018)	NTM	2.85	3.0566	3.4396	-1.0865	-0.2408	1.3273
Neural crest-like (Tsoi, 2018)	TGFBI	6.9439	7.6599	8.5847	-1.1696	-0.1037	1.2733
Neural crest-like (Tsoi, 2018)	TMEM171	0.9709	2.6206	6.9565	-1.0082	-0.3547	1.3629
Neural crest-like (Tsoi, 2018)	ANGPTL4	0.848	1.0704	6.8323	-0.7469	-0.6666	1.4135
Neural crest-like (Tsoi, 2018)	AIM2	0.9107	5.6244	0.669	-0.6535	1.4129	-0.7594
Neural crest-like (Tsoi, 2018)	CHST2	3.1243	4.975	3.5692	-0.9701	1.3762	-0.4061
Neural crest-like (Tsoi, 2018)	DEPDC7	4.4229	3.3219	2.5874	1.2977	-0.1619	-1.1357
Neural crest-like (Tsoi, 2018)	BST1	3.9681	2.7442	5.5919	-0.1143	-1.1636	1.2779
Neural crest-like (Tsoi, 2018)	ABCA6	1.3161	0.0976	0.3334	1.3905	-0.9187	-0.4718
Undifferentiated-Neural crest-like (Tsoi, 2018)	JUN	7.0005	7.4845	8.6177	-1.0335	-0.3193	1.3528
Undifferentiated-Neural crest-like (Tsoi, 2018)	LOXL2	3.5777	7.3204	8.6083	-1.3706	0.3835	0.9871
Undifferentiated-Neural crest-like (Tsoi, 2018)	NEGR1	0.2265	1.1043	2.0841	-1.2017	-0.0448	1.2465
Undifferentiated-Neural crest-like (Tsoi, 2018)	PDGFRB	0.7398	1.0841	3.0687	-0.8681	-0.5328	1.4009
Undifferentiated-Neural crest-like (Tsoi, 2018)	SLIT2	0.2265	1.4489	2.6826	-1.2229	-0.0037	1.2266
Undifferentiated-Neural crest-like (Tsoi, 2018)	SLC12A8	0.6508	1.9819	2.516	-1.3584	0.3387	1.0198
Undifferentiated-Neural crest-like (Tsoi, 2018)	SLC2A1	5.2464	5.3143	6.7823	-0.7545	-0.6586	1.4131
Undifferentiated-Neural crest-like (Tsoi, 2018)	TPM1	6.5289	7.7299	8.3523	-1.3321	0.2548	1.0773
Undifferentiated-Neural crest-like (Tsoi, 2018)	ITGA2	3.6346	4.04	4.1659	-1.3774	0.411	0.9664
Undifferentiated-Neural crest-like (Tsoi, 2018)	ARNTL2	1.7655	4.0557	0.189	-0.1499	1.2928	-1.1429
Undifferentiated-Neural crest-like (Tsoi, 2018)	NRG1	0.1375	0.4751	0.1375	-0.7071	1.4142	-0.7071
Undifferentiated-Neural crest-like (Tsoi, 2018)	ARL4C	3.1457	7.0803	4.1779	-0.994	1.3682	-0.3743
Undifferentiated-Neural crest-like (Tsoi, 2018)	GFRA1	2.7027	0.3448	0.2388	1.4132	-0.66	-0.7532
Undifferentiated-Neural crest-like (Tsoi, 2018)	F2RL2	0.2987	0.251	0.7398	-0.596	-0.8127	1.4087
Undifferentiated-Neural crest-like (Tsoi, 2018)	ID1	5.7514	4.0286	5.6946	0.7424	-1.4136	0.6713
MSC (Belote, 2021)	DHRS3	2.842	5.2943	8.1645	-1.1915	-0.0641	1.2555
MSC (Belote, 2021)	OSR2	1.7137	2.211	2.5874	-1.2772	0.1127	1.1645
MSC (Belote, 2021)	FBN1	2.2928	4.2869	4.9298	-1.375	0.4012	0.9738
MSC (Belote, 2021)	COL1A2	0.5261	0.546	8.0977	-0.7099	-0.7043	1.4142
MSC (Belote, 2021)	LOXL2	3.5777	7.3204	8.6083	-1.3706	0.3835	0.9871
MSC (Belote, 2021)	COL1A1	3.4356	5.6106	6.6662	-1.3397	0.2774	1.0622
MSC (Belote, 2021)	OLFML3	0.926	3.5668	4.2891	-1.3845	0.4424	0.9421
MSC (Belote, 2021)	SH3PXD2A	4.8875	4.9016	4.7371	0.6105	0.7995	-1.41
MSC (Belote, 2021)	CYR61	7.3331	9.8666	8.8251	-1.2906	1.1461	0.1444
MSC (Belote, 2021)	PPAP2B	6.1665	5.489	0.8875	0.8466	0.5577	-1.4043
MSC (Belote, 2021)	CLDN11	1.0072	0.5261	3.9709	-0.5433	-0.8591	1.4024
MSC (Belote, 2021)	IQGAP2	2.2869	0.0841	1.7268	0.9852	-1.3713	0.3861
Undifferentiated (Tsoi, 2018)	ABCG2	0.9561	2.5826	2.8135	-1.405	0.5628	0.8422
Undifferentiated (Tsoi, 2018)	MYEOV	0.0144	1.4906	2.4983	-1.2941	0.1531	1.141
Undifferentiated (Tsoi, 2018)	ADAMTSL1	0.275	5.285	0.2388	-0.6995	1.4142	-0.7147
Undifferentiated (Tsoi, 2018)	ZDHHC2	4.3813	4.8924	2.1731	0.4794	0.9125	-1.3919
Undifferentiated (Tsoi, 2018)	AR	0.2987	2.6781	0.4005	-0.753	1.4132	-0.6602
Undifferentiated (Tsoi, 2018)	AJUBA	2.6622	6.3654	4.4396	-1.2081	1.2408	-0.0327
Undifferentiated (Tsoi, 2018)	ACSL5	1.3161	1.1953	0.3219	0.8391	0.5664	-1.4054
Undifferentiated (Tsoi, 2018)	JUP	3.0841	0.4114	4.8094	0.1745	-1.3026	1.1281
Undifferentiated (Tsoi, 2018)	PLEKHA6	0.3219	0.1243	0.2141	1.2602	-1.1859	-0.0743
ADT (Belote, 2021)	IFI27	4.9165	5.6067	4.1699	0.032	1.2084	-1.2404
ADT (Belote, 2021)	SPECC1	3.4594	4.235	2.6229	0.0309	1.209	-1.2399
ADT (Belote, 2021)	CAPG	2.5534	6.8188	2.3277	-0.6518	1.4128	-0.761
ADT (Belote, 2021)	CLU	4.5807	6.1266	2.157	0.1791	1.1253	-1.3044
NEO (Belote, 2021)	WDSUB1	4.0045	4.1218	3.7835	0.2464	1.0828	-1.3292
NEO (Belote, 2021)	OGFRL1	5.2854	5.7889	2.4568	0.5285	0.8718	-1.4003
NEO (Belote, 2021)	SURF1	5.7101	7.0145	5.4532	-0.5108	1.3975	-0.8867
NEO (Belote, 2021)	PNP	5.0518	6.5983	4.3992	-0.3231	1.3539	-1.0308
NEO (Belote, 2021)	AIG1	4.0976	4.3646	3.9402	-0.2084	1.3156	-1.1072
NEO (Belote, 2021)	MICAL2	3.2479	4.384	1.4542	0.1817	1.1237	-1.3055
NEO (Belote, 2021)	SLCO4A1	2.9635	3.3868	0.0144	0.5613	0.8435	-1.4048
FET (Belote, 2021)	FUT11	3.4906	3.729	3.2525	-0.0006	1.225	-1.2244
Melanocytic (Tsoi, 2018)	HMOX1	6.0268	8.2011	5.6579	-0.5363	1.4014	-0.8651
Melanocytic (Tsoi, 2018)	HSD17B14	3.1043	4.7404	2.5753	-0.4004	1.3748	-0.9744
Melanocytic (Tsoi, 2018)	PRUNE2	1.6915	4.0807	0.0841	-0.1587	1.2964	-1.1377
Melanocytic (Tsoi, 2018)	RNF144B	3.4182	4.4383	1.9107	0.1565	1.139	-1.2955
Melanocytic (Tsoi, 2018)	SLC16A6	3.5981	5.7552	0.6135	0.1309	1.1541	-1.2849
Neural crest-like (Tsoi, 2018)	PLA2G7	1.4906	4.1562	0.2388	-0.2885	1.3432	-1.0547
Neural crest-like (Tsoi, 2018)	RAMP1	2.9486	3.8104	0.275	0.4012	0.9738	-1.375
Neural crest-like (Tsoi, 2018)	SFRP1	2.3161	8.435	1.8758	-0.6323	1.4117	-0.7794
Neural crest-like (Tsoi, 2018)	SH3PXD2A	4.8875	4.9016	4.7371	0.6105	0.7995	-1.41
Neural crest-like (Tsoi, 2018)	SHISA2	3.111	3.9828	0.275	0.4136	0.9644	-1.378
Neural crest-like (Tsoi, 2018)	SQRDL	4.6594	6.7856	4.2055	-0.4957	1.3949	-0.8992
Undifferentiated-Neural crest-like (Tsoi, 2018)	CARD10	5.2547	5.8795	2.8699	0.4524	0.9342	-1.3866
Undifferentiated-Neural crest-like (Tsoi, 2018)	COL12A1	1.511	2.6041	0.8319	-0.189	1.3083	-1.1192
Undifferentiated-Neural crest-like (Tsoi, 2018)	CLMP	3.6531	4.3547	0.1506	0.5077	0.8893	-1.3969
Undifferentiated-Neural crest-like (Tsoi, 2018)	DPYD	0.251	3.0841	0.1635	-0.6746	1.4137	-0.7391
Undifferentiated-Neural crest-like (Tsoi, 2018)	ERRFI1	5.0488	5.3085	3.9764	0.4698	0.9203	-1.3901
Undifferentiated-Neural crest-like (Tsoi, 2018)	FAM171A1	0.3896	4.7918	0.3219	-0.6909	1.4141	-0.7232
Undifferentiated-Neural crest-like (Tsoi, 2018)	FAM20C	4.4529	8.3315	4.1771	-0.6332	1.4117	-0.7785
Undifferentiated-Neural crest-like (Tsoi, 2018)	FAM83G	1.0286	4.0365	0.4647	-0.5196	1.3989	-0.8793
Undifferentiated-Neural crest-like (Tsoi, 2018)	FLNB	5.3875	7.3288	4.5723	-0.3246	1.3544	-1.0297
Undifferentiated-Neural crest-like (Tsoi, 2018)	FJX1	3.1276	4.784	3.0054	-0.6304	1.4115	-0.7811
Undifferentiated-Neural crest-like (Tsoi, 2018)	GLIPR1	1.8319	5.384	1.8074	-0.6998	1.4142	-0.7144
Undifferentiated-Neural crest-like (Tsoi, 2018)	HRH1	0.7398	3.8924	0.111	-0.5085	1.3971	-0.8886
Undifferentiated-Neural crest-like (Tsoi, 2018)	IL1B	0.926	7.3307	0.8797	-0.6995	1.4142	-0.7147
Undifferentiated-Neural crest-like (Tsoi, 2018)	NRP1	1.6182	7.1503	0.774	-0.5526	1.4037	-0.8511
Undifferentiated-Neural crest-like (Tsoi, 2018)	PLAUR	5.1969	7.0667	4.6882	-0.4436	1.3847	-0.9411
Undifferentiated-Neural crest-like (Tsoi, 2018)	PODXL	5.1985	7.5674	0.5059	0.264	1.0712	-1.3352
Undifferentiated-Neural crest-like (Tsoi, 2018)	KCNN4	4.0815	6.9945	3.5521	-0.525	1.3997	-0.8747
Undifferentiated-Neural crest-like (Tsoi, 2018)	PRSS23	7.2139	8.7394	6.8773	-0.4891	1.3937	-0.9046
Undifferentiated-Neural crest-like (Tsoi, 2018)	PKIA	0.275	3.7236	0.0976	-0.6533	1.4129	-0.7596
Undifferentiated-Neural crest-like (Tsoi, 2018)	THSD4	2.3363	3.8135	0.2141	0.1455	1.1455	-1.291
Undifferentiated-Neural crest-like (Tsoi, 2018)	TLR4	1.7908	4.6328	0.0566	-0.1958	1.3108	-1.1151
Undifferentiated-Neural crest-like (Tsoi, 2018)	TPBG	2.3533	5.5398	1.4276	-0.4278	1.3813	-0.9534
MSC (Belote, 2021)	COL12A1	1.511	2.6041	0.8319	-0.189	1.3083	-1.1192
Undifferentiated (Tsoi, 2018)	BDNF	1.7782	3.9155	0.6229	-0.24	1.327	-1.087
Undifferentiated (Tsoi, 2018)	CITED2	6.3533	7.8054	5.7687	-0.3377	1.3582	-1.0205
Undifferentiated (Tsoi, 2018)	CDYL2	2.3103	2.9449	0.0841	0.4325	0.9498	-1.3823
Undifferentiated (Tsoi, 2018)	CLU	4.5807	6.1266	2.157	0.1791	1.1253	-1.3044
Undifferentiated (Tsoi, 2018)	F3	1.8758	2.9317	0.7824	0.0142	1.2176	-1.2318
Undifferentiated (Tsoi, 2018)	CCDC69	1.3618	1.9891	0.275	0.2162	1.1022	-1.3185
Undifferentiated (Tsoi, 2018)	DOCK2	0.9635	2.8115	0.0704	-0.2789	1.3401	-1.0613
Undifferentiated (Tsoi, 2018)	FAM196B	0.7049	0.8074	0	0.5595	0.8451	-1.4046
Undifferentiated (Tsoi, 2018)	FAT4	0.9855	1.848	0.1243	-0.0006	1.2251	-1.2244
Undifferentiated (Tsoi, 2018)	FERMT1	0.585	3.2913	0.0144	-0.4981	1.3953	-0.8973
Undifferentiated (Tsoi, 2018)	FMNL1	3.0807	5.8856	1.9819	-0.346	1.3605	-1.0145
Undifferentiated (Tsoi, 2018)	GPRC5A	4.7586	5.3078	2.9505	0.4167	0.962	-1.3787
Undifferentiated (Tsoi, 2018)	GLIS2	4.0909	4.2048	2.7824	0.617	0.7935	-1.4105
Undifferentiated (Tsoi, 2018)	IL4R	3.8156	5.4832	3.6124	-0.5824	1.4073	-0.8249
Undifferentiated (Tsoi, 2018)	KRT18	6.4205	8.2137	0.8074	0.4036	0.972	-1.3756
Undifferentiated (Tsoi, 2018)	KRT80	1.2203	5.5192	0.6135	-0.5636	1.4051	-0.8415
Undifferentiated (Tsoi, 2018)	LAMA5	4.5129	6.1912	3.742	-0.2958	1.3456	-1.0497
Undifferentiated (Tsoi, 2018)	MICAL2	3.2479	4.384	1.4542	0.1817	1.1237	-1.3055
Undifferentiated (Tsoi, 2018)	NUAK1	2.7225	3.1651	0.8319	0.477	0.9145	-1.3915
Undifferentiated (Tsoi, 2018)	PLAGL1	1.9523	4.4148	0.0426	-0.103	1.273	-1.17
Undifferentiated (Tsoi, 2018)	PAWR	3.9699	4.0461	3.516	0.538	0.8637	-1.4017
Undifferentiated (Tsoi, 2018)	ARHGAP29	1.5705	6.1096	0.6599	-0.5074	1.3969	-0.8895
Undifferentiated (Tsoi, 2018)	SCNN1A	0.4222	1.189	0.1635	-0.3889	1.372	-0.9831
Undifferentiated (Tsoi, 2018)	TOX	0.6871	1.157	0.0976	0.0919	1.1762	-1.2681
Undifferentiated (Tsoi, 2018)	TRERF1	2.7071	3.8176	2.669	-0.6711	1.4136	-0.7425
Undifferentiated (Tsoi, 2018)	GALNT6	2.359	4.5211	1.7268	-0.4263	1.3809	-0.9546
ADT (Belote, 2021)	MT2A	6.3716	13.2732	8.6697	-1.0687	1.3365	-0.2678
ADT (Belote, 2021)	HLA-B	2.157	6.7133	3.342	-0.9915	1.3691	-0.3776
ADT (Belote, 2021)	MT1M	0	6.2302	3.2464	-1.2416	1.2072	0.0344
NEO (Belote, 2021)	HSD3B7	1.4699	4.7247	2.2296	-0.9625	1.3786	-0.4161
NEO (Belote, 2021)	CDSN	0.0426	0.2141	0.189	-1.4012	0.8665	0.5347
NEO (Belote, 2021)	MAD1L1	5.3761	6.3221	5.7527	-1.1338	1.2989	-0.1652
FET (Belote, 2021)	IER2	5.9047	8.2182	7.8653	-1.4	0.8734	0.5266
FET (Belote, 2021)	RAB3B	0.0566	4.2055	0.3219	-0.7759	1.4119	-0.636
FET (Belote, 2021)	LIMS2	0.4751	4.2008	2.541	-1.2667	1.1779	0.0888
FET (Belote, 2021)	PLAU	0.5059	7.6128	1.5607	-0.8688	1.4008	-0.532
FET (Belote, 2021)	CRMP1	1.9069	3.009	2.3896	-1.1711	1.2721	-0.1011
Melanocytic (Tsoi, 2018)	NAV2	4.7929	6.0407	5.7315	-1.3736	0.9782	0.3954
Melanocytic (Tsoi, 2018)	PYCARD	5.1367	6.6282	5.2437	-0.7844	1.4113	-0.6268
Melanocytic (Tsoi, 2018)	TTC39A	0.5558	2.0072	0.8718	-0.9453	1.3836	-0.4382
Neural crest-like-Transitory (Tsoi, 2018)	SPRY4	6.607	6.89	6.7287	-1.1639	1.2776	-0.1137
Neural crest-like (Tsoi, 2018)	EML1	0.4005	3.9718	1.6415	-1.0836	1.3288	-0.2453
Neural crest-like (Tsoi, 2018)	IER3	4.6381	7.3162	5.588	-1.0908	1.3249	-0.234
Neural crest-like (Tsoi, 2018)	LRRC15	0.1243	4.1194	1.8237	-1.1595	1.2809	-0.1214
Neural crest-like (Tsoi, 2018)	PHLDA2	5.2987	7.9032	7.4508	-1.3954	0.8968	0.4986
Neural crest-like (Tsoi, 2018)	S100A6	10.1486	12.9601	10.463	-0.8284	1.4068	-0.5784
Neural crest-like (Tsoi, 2018)	TMEM47	0.1506	2.9467	1.0772	-1.0671	1.3373	-0.2702
Neural crest-like (Tsoi, 2018)	ZNF469	0.3674	1.0215	0.669	-1.1918	1.2552	-0.0633
Undifferentiated-Neural crest-like (Tsoi, 2018)	AKR1C3	0.0976	4.2234	0.9107	-0.9226	1.3895	-0.4669
Undifferentiated-Neural crest-like (Tsoi, 2018)	ANXA1	6.3999	11.5517	8.3592	-1.1164	1.31	-0.1936
Undifferentiated-Neural crest-like (Tsoi, 2018)	ANTXR2	3.101	5.0224	3.8639	-1.1327	1.2996	-0.1669
Undifferentiated-Neural crest-like (Tsoi, 2018)	ABCC3	0.251	3.2735	0.9411	-0.9569	1.3802	-0.4233
Undifferentiated-Neural crest-like (Tsoi, 2018)	AXL	2.5705	8.8791	4.5065	-1.0415	1.3493	-0.3078
Undifferentiated-Neural crest-like (Tsoi, 2018)	CLCF1	0.7049	4.9676	1.1635	-0.8237	1.4074	-0.5837
Undifferentiated-Neural crest-like (Tsoi, 2018)	CAV1	5.5438	7.3205	6.8206	-1.3606	1.0144	0.3461
Undifferentiated-Neural crest-like (Tsoi, 2018)	C12orf75	4.332	7.2822	5.3345	-1.0757	1.3329	-0.2572
Undifferentiated-Neural crest-like (Tsoi, 2018)	C15orf52	3.8689	6.8718	5.5239	-1.2643	1.1809	0.0833
Undifferentiated-Neural crest-like (Tsoi, 2018)	C16orf45	1.7991	4.0883	2.991	-1.2412	1.2075	0.0337
Undifferentiated-Neural crest-like (Tsoi, 2018)	COL5A1	0.546	0.7312	0.6508	-1.2748	1.1676	0.1072
Undifferentiated-Neural crest-like (Tsoi, 2018)	COL13A1	0.111	4.4383	0.4957	-0.8032	1.4096	-0.6065
Undifferentiated-Neural crest-like (Tsoi, 2018)	CYR61	7.3331	9.8666	8.8251	-1.2906	1.1461	0.1444
Undifferentiated-Neural crest-like (Tsoi, 2018)	DOCK5	2.2327	4.7866	2.3448	-0.7542	1.4131	-0.659
Undifferentiated-Neural crest-like (Tsoi, 2018)	DKK1	1.281	5.5702	1.4957	-0.7608	1.4128	-0.652
Undifferentiated-Neural crest-like (Tsoi, 2018)	EFNB2	1.3561	4.627	4.2234	-1.4051	0.8412	0.564
Undifferentiated-Neural crest-like (Tsoi, 2018)	FOSL1	4.8202	10.6528	7.6305	-1.2096	1.2393	-0.0297
Undifferentiated-Neural crest-like (Tsoi, 2018)	FZD2	2.9069	5.946	3.9136	-1.0669	1.3374	-0.2705
Undifferentiated-Neural crest-like (Tsoi, 2018)	GPR176	2.6531	5.4063	3.3391	-0.9797	1.3731	-0.3934
Undifferentiated-Neural crest-like (Tsoi, 2018)	GAS6	2.9523	6.5795	4.3226	-1.1139	1.3115	-0.1976
Undifferentiated-Neural crest-like (Tsoi, 2018)	INHBA	1.0635	2.6938	1.2265	-0.8154	1.4084	-0.593
Undifferentiated-Neural crest-like (Tsoi, 2018)	IGFBP6	4.1185	8.1506	4.3074	-0.7573	1.413	-0.6557
Undifferentiated-Neural crest-like (Tsoi, 2018)	ITGA3	4.645	9.7484	7.4824	-1.2678	1.1766	0.0912
Undifferentiated-Neural crest-like (Tsoi, 2018)	IL11	0.6229	3.2675	0.757	-0.7615	1.4128	-0.6513
Undifferentiated-Neural crest-like (Tsoi, 2018)	MPP4	0.0841	2.6369	0.8797	-1.0465	1.347	-0.3005
Undifferentiated-Neural crest-like (Tsoi, 2018)	MT1E	0.2141	9.528	6.1548	-1.3207	1.0984	0.2223
Undifferentiated-Neural crest-like (Tsoi, 2018)	MT2A	6.3716	13.2732	8.6697	-1.0687	1.3365	-0.2678
Undifferentiated-Neural crest-like (Tsoi, 2018)	NTN4	1.144	5.7751	2.3923	-1.0017	1.3654	-0.3637
Undifferentiated-Neural crest-like (Tsoi, 2018)	PXDN	0.0841	6.3316	4.1819	-1.3307	1.0801	0.2506
Undifferentiated-Neural crest-like (Tsoi, 2018)	KCNMA1	0.0426	4.04	0.8074	-0.9162	1.3911	-0.4748
Undifferentiated-Neural crest-like (Tsoi, 2018)	PAPPA	0.2016	3.86	0.3896	-0.7622	1.4127	-0.6505
Undifferentiated-Neural crest-like (Tsoi, 2018)	S100A2	1.84	4.5601	2.7355	-1.0648	1.3384	-0.2736
Undifferentiated-Neural crest-like (Tsoi, 2018)	SMAGP	1.903	5.7241	3.0126	-1.024	1.3567	-0.3327
Undifferentiated-Neural crest-like (Tsoi, 2018)	SLC16A2	1.7398	4.729	3.5874	-1.309	1.118	0.191
Undifferentiated-Neural crest-like (Tsoi, 2018)	SPOCK1	1.0635	7.0044	1.7485	-0.8322	1.4063	-0.5741
Undifferentiated-Neural crest-like (Tsoi, 2018)	SPOCD1	0.9709	3.84	3.0993	-1.3698	0.9894	0.3804
Undifferentiated-Neural crest-like (Tsoi, 2018)	SPRED3	0.7824	2.0909	0.9561	-0.8514	1.4036	-0.5522
Undifferentiated-Neural crest-like (Tsoi, 2018)	STC2	1.0286	5.269	1.5801	-0.8485	1.4041	-0.5555
Undifferentiated-Neural crest-like (Tsoi, 2018)	SYT1	0.1506	2.7761	1.757	-1.3052	1.1241	0.1812
Undifferentiated-Neural crest-like (Tsoi, 2018)	STX1A	2.5777	6.0148	2.7398	-0.7577	1.413	-0.6553
Undifferentiated-Neural crest-like (Tsoi, 2018)	TNFRSF12A	4.4356	8.9395	6.4429	-1.1781	1.2666	-0.0885
Undifferentiated-Neural crest-like (Tsoi, 2018)	TWIST2	0.4647	4.7463	1.7866	-1.0434	1.3484	-0.305
vMel (Belote, 2021)	RAB3B	0.0566	4.2055	0.3219	-0.7759	1.4119	-0.636
vMel (Belote, 2021)	IGDCC4	1.2869	3.0959	1.5705	-0.878	1.3991	-0.5211
vMel (Belote, 2021)	ID2	4.7219	4.5945	6.2869	-0.6227	-0.7883	1.411
vMel (Belote, 2021)	PDLIM4	5.6845	0.4957	3.568	1.1431	-1.2927	0.1496
MSC (Belote, 2021)	TWIST2	0.4647	4.7463	1.7866	-1.0434	1.3484	-0.305
MSC (Belote, 2021)	AXL	2.5705	8.8791	4.5065	-1.0415	1.3493	-0.3078
MSC (Belote, 2021)	COL5A1	0.546	0.7312	0.6508	-1.2748	1.1676	0.1072
MSC (Belote, 2021)	CXCL14	1.2449	1.4594	1.3561	-1.2396	1.2093	0.0303
Undifferentiated (Tsoi, 2018)	ATP8B1	0.3334	4.5229	3.0738	-1.3297	1.0819	0.2478
Undifferentiated (Tsoi, 2018)	BASP1	0.4957	7.1732	2.3161	-1.005	1.3642	-0.3591
Undifferentiated (Tsoi, 2018)	CNN1	0.2987	4.859	1.2203	-0.9281	1.3881	-0.46
Undifferentiated (Tsoi, 2018)	CREB3L1	0.251	3.3089	1.7485	-1.2163	1.2331	-0.0168
Undifferentiated (Tsoi, 2018)	CPA4	0.2869	6.3647	1.0496	-0.8435	1.4048	-0.5613
Undifferentiated (Tsoi, 2018)	CORO6	1	5.2847	3.0161	-1.2	1.2481	-0.0481
Undifferentiated (Tsoi, 2018)	CRIM1	0.6599	6.3549	4.7301	-1.3589	1.0186	0.3403
Undifferentiated (Tsoi, 2018)	DSE	1.7312	3.4449	2.3813	-1.1155	1.3106	-0.1951
Undifferentiated (Tsoi, 2018)	EGFR	0.1375	5.5024	0.2265	-0.7248	1.4141	-0.6893
Undifferentiated (Tsoi, 2018)	FLNC	1.281	7.2584	4.3448	-1.2349	1.2144	0.0205
Undifferentiated (Tsoi, 2018)	GATA2	2.4356	3.3716	2.9745	-1.2817	1.1584	0.1233
Undifferentiated (Tsoi, 2018)	IGFN1	0.2388	4.4039	2.254	-1.2113	1.2377	-0.0264
Undifferentiated (Tsoi, 2018)	IRS1	3.497	4.7404	3.5248	-0.731	1.4139	-0.683
Undifferentiated (Tsoi, 2018)	MGST1	2.6736	7.1966	6.0041	-1.3677	0.9954	0.3723
Undifferentiated (Tsoi, 2018)	NMT2	2.7137	4.935	2.9982	-0.8463	1.4044	-0.5581
Undifferentiated (Tsoi, 2018)	PLAU	0.5059	7.6128	1.5607	-0.8688	1.4008	-0.532
Undifferentiated (Tsoi, 2018)	PDGFC	3.488	5.0535	3.7981	-0.9237	1.3893	-0.4656
Undifferentiated (Tsoi, 2018)	PBX1	0.189	1.406	0.6415	-1.108	1.3151	-0.207
Undifferentiated (Tsoi, 2018)	SECTM1	0.7049	4.8694	2.0704	-1.0634	1.3391	-0.2757
Undifferentiated (Tsoi, 2018)	SH3RF2	0.0566	4.1993	0.8319	-0.9116	1.3921	-0.4805
Undifferentiated (Tsoi, 2018)	SOX9	0.7655	6.6925	2.5534	-1.036	1.3517	-0.3157
Undifferentiated (Tsoi, 2018)	TBC1D2	1.7398	7.9148	2.0976	-0.7694	1.4123	-0.643
Undifferentiated (Tsoi, 2018)	TNFAIP2	1.0909	6.4305	5.5182	-1.3961	0.8936	0.5024
Undifferentiated (Tsoi, 2018)	VASN	2.568	4.969	3.0858	-0.943	1.3842	-0.4412
Undifferentiated (Tsoi, 2018)	ZNF185	1.3103	5.4845	1.3785	-0.7245	1.4141	-0.6896
Undifferentiated (Tsoi, 2018)	MARCH4	0.0704	5.804	0.9782	-0.8798	1.3988	-0.519
ADT (Belote, 2021)	GBX2	0.8875	0.546	0.4542	1.3854	-0.4465	-0.9388
NEO (Belote, 2021)	ATPAF2	4.991	4.4976	3.9364	1.1976	0.0525	-1.2502
FET (Belote, 2021)	ADAT2	2.8258	2.433	1.8875	1.1533	0.1322	-1.2855
Melanocytic (Tsoi, 2018)	QPCT	10.1559	5.3799	4.6781	1.4044	-0.558	-0.8464
Melanocytic (Tsoi, 2018)	H2AFJ	5.2972	4.2615	2.8856	1.1633	0.1148	-1.2781
Melanocytic (Tsoi, 2018)	KCNAB2	5.7921	3.6276	3.4276	1.4101	-0.6116	-0.7985
Melanocytic (Tsoi, 2018)	RNLS	3.1127	2.1667	0.0144	1.0398	0.3102	-1.35
Melanocytic (Tsoi, 2018)	RUNX3	5.9748	3.211	1.7049	1.326	-0.2371	-1.0889
Melanocytic (Tsoi, 2018)	VEPH1	4.9107	3.3277	2.5361	1.3363	-0.2672	-1.0691
Transitory-Melanocytic (Tsoi, 2018)	CTTNBP2	3.1391	2.1473	0.9635	1.1872	0.072	-1.2591
Transitory-Melanocytic (Tsoi, 2018)	GJB1	7.7346	0.8953	0.2388	1.4098	-0.608	-0.8017
Transitory-Melanocytic (Tsoi, 2018)	GYPC	8.3242	6.9065	6.8848	1.4141	-0.6909	-0.7231
Transitory-Melanocytic (Tsoi, 2018)	LAMA1	5.8243	3.7856	2.9819	1.36	-0.3441	-1.0159
Transitory-Melanocytic (Tsoi, 2018)	SLC5A4	8.4708	0.9855	0.3103	1.4103	-0.6139	-0.7964
Transitory-Melanocytic (Tsoi, 2018)	VGF	8.9652	3.2943	1.3951	1.3725	-0.391	-0.9815
Neural crest-like-Transitory (Tsoi, 2018)	LOXL4	7.2449	5.6809	2.8914	1.0955	0.2269	-1.3223
Neural crest-like (Tsoi, 2018)	EHF	3.6645	0.5945	0.0704	1.4013	-0.5353	-0.866
Neural crest-like (Tsoi, 2018)	SERTAD4	3.6679	3.5472	1.2079	0.7597	0.6531	-1.4129
Undifferentiated-Neural crest-like (Tsoi, 2018)	PRDM1	1.6508	0.5261	0.4542	1.4122	-0.6405	-0.7717
MSC (Belote, 2021)	NREP	6.0472	4.6565	0.9107	1.003	0.3619	-1.3649
MSC (Belote, 2021)	LUM	4.6611	2.1375	1.5656	1.3927	-0.4837	-0.909
MSC (Belote, 2021)	TCF4	3.1603	2.275	0.4436	1.0613	0.2788	-1.3401
Undifferentiated (Tsoi, 2018)	AMIGO2	4.2071	0.6415	0.0426	1.4016	-0.5379	-0.8637
Undifferentiated (Tsoi, 2018)	CCDC88C	1.0976	0.1506	0.0976	1.4126	-0.6487	-0.7639
Undifferentiated (Tsoi, 2018)	CDK15	1.7655	1.7004	1.669	1.3403	-0.2793	-1.0609
Undifferentiated (Tsoi, 2018)	DIO2	0.2016	0.0976	0.0841	1.4064	-0.5742	-0.8321
Undifferentiated (Tsoi, 2018)	IL7R	2.3103	1.157	0.0976	1.2417	-0.0346	-1.2071
Undifferentiated (Tsoi, 2018)	KRT8	5.641	4.5392	0.251	0.9307	0.4568	-1.3875
Undifferentiated (Tsoi, 2018)	KRT81	1.263	0.9486	0.0144	0.9825	0.3896	-1.3722
Undifferentiated (Tsoi, 2018)	PHLDB2	4.8987	4.6288	3.9059	1.0042	0.3602	-1.3645
Undifferentiated (Tsoi, 2018)	UCP2	5.0479	2.2928	1.9107	1.4054	-0.566	-0.8394
Undifferentiated (Tsoi, 2018)	SLC8A1	2.4436	2.1922	1.4383	0.9807	0.3921	-1.3728
ADT (Belote, 2021)	CD36	1.2079	0.3103	7.7798	-0.568	-0.8376	1.4056
ADT (Belote, 2021)	CHADL	2.2418	1.0072	3.4209	0.0188	-1.234	1.2152
ADT (Belote, 2021)	NDRG2	5.5847	1.0841	5.6868	0.6832	-1.4139	0.7308
ADT (Belote, 2021)	TSC22D3	5.0985	4.7929	6.6612	-0.5121	-0.8856	1.3977
NEO (Belote, 2021)	POLR3C	5.7214	5.3621	6.1117	-0.0338	-1.2075	1.2413
NEO (Belote, 2021)	NIT2	6.4446	5.761	7.0113	0.0762	-1.2611	1.1849
NEO (Belote, 2021)	TM2D3	5.478	5.3985	5.6488	-0.2913	-1.0528	1.3441
NEO (Belote, 2021)	RASSF3	6.7242	5.3143	6.9045	0.5765	-1.4066	0.8301
NEO (Belote, 2021)	PIGF	5.6115	4.3384	5.6358	0.687	-1.414	0.7271
NEO (Belote, 2021)	SNAP29	5.4429	4.9345	5.5081	0.5762	-1.4066	0.8304
NEO (Belote, 2021)	EDNRB	8.2182	2.8875	9.4052	0.4873	-1.3934	0.9061
NEO (Belote, 2021)	MDH1	8.3837	7.5421	8.3847	0.7059	-1.4142	0.7084
NEO (Belote, 2021)	PKIG	6.1274	5.6375	6.3853	0.2495	-1.3303	1.0808
NEO (Belote, 2021)	TMEM204	3.2928	0.5261	3.8074	0.521	-1.3991	0.8781
NEO (Belote, 2021)	SPG21	7.2899	7.2306	7.4497	-0.3621	-1.0028	1.365
NEO (Belote, 2021)	ARSI	1.546	0.0841	5.2172	-0.3411	-1.0181	1.3591
NEO (Belote, 2021)	ZNF330	6.4612	4.9991	7.0916	0.3163	-1.3519	1.0355
FET (Belote, 2021)	NCKAP5	2.842	0.3219	2.8817	0.6905	-1.4141	0.7236
FET (Belote, 2021)	AUTS2	3.717	2.9745	4.1731	0.1932	-1.3099	1.1167
FET (Belote, 2021)	ZNF517	2.4828	2.2079	4.0295	-0.5287	-0.8716	1.4003
FET (Belote, 2021)	MOXD1	7.6536	5.4653	7.891	0.5956	-1.4086	0.813
FET (Belote, 2021)	SPTSSA	6.5567	6.0672	7.578	-0.2816	-1.0594	1.341
FET (Belote, 2021)	PLAT	7.6949	5.6736	7.9874	0.5601	-1.4047	0.8445
FET (Belote, 2021)	ANK2	3.9011	1.8319	3.925	0.6949	-1.4141	0.7193
FET (Belote, 2021)	PTGDS	2.2327	0.1763	2.5993	0.5282	-1.4002	0.872
FET (Belote, 2021)	FOS	8.0111	6.8179	9.2007	0.0012	-1.2254	1.2241
Melanocytic (Tsoi, 2018)	ABCB5	3.5472	0.2388	4.0365	0.5571	-1.4043	0.8472
Melanocytic (Tsoi, 2018)	C2orf88	2.4489	1.585	4.9832	-0.3861	-0.9852	1.3713
Melanocytic (Tsoi, 2018)	ENTHD1	2.7613	0.0566	4.2126	0.2426	-1.3279	1.0853
Melanocytic (Tsoi, 2018)	FAM174B	5.1185	0.433	6.0607	0.507	-1.3968	0.8898
Melanocytic (Tsoi, 2018)	GPR143	6.8288	0.5945	7.6173	0.5779	-1.4068	0.8289
Melanocytic (Tsoi, 2018)	IL12RB2	1.9146	0.3896	3.5122	-0.019	-1.2151	1.2341
Melanocytic (Tsoi, 2018)	MLANA	8.8833	2.06	9.6858	0.5866	-1.4077	0.8211
Melanocytic (Tsoi, 2018)	RGS12	3.9174	3.859	4.7829	-0.6368	-0.7752	1.412
Melanocytic (Tsoi, 2018)	SLC7A8	5.1461	0.4957	8.1967	0.1684	-1.3002	1.1318
Melanocytic (Tsoi, 2018)	TRPM1	2.844	0.111	5.8537	-0.0393	-1.2046	1.2439
Melanocytic (Tsoi, 2018)	TRIM63	4.9425	0.7225	7.8977	0.1432	-1.29	1.1469
Melanocytic (Tsoi, 2018)	TDRD3	4.4509	3.5447	4.8192	0.3348	-1.3573	1.0225
Melanocytic (Tsoi, 2018)	TNFRSF14	7.4807	5.757	7.9108	0.4633	-1.3888	0.9255
Transitory-Melanocytic (Tsoi, 2018)	ADRBK2	3.0925	0.1635	4.6724	0.2407	-1.3272	1.0865
Transitory-Melanocytic (Tsoi, 2018)	ANK2	3.9011	1.8319	3.925	0.6949	-1.4141	0.7193
Transitory-Melanocytic (Tsoi, 2018)	ASB2	3.1489	1.3045	3.3923	0.5725	-1.4062	0.8336
Transitory-Melanocytic (Tsoi, 2018)	ATP10A	3.2296	0.0426	3.7887	0.5309	-1.4006	0.8697
Transitory-Melanocytic (Tsoi, 2018)	BIRC7	4.7923	2.7866	5.7996	0.2658	-1.3358	1.07
Transitory-Melanocytic (Tsoi, 2018)	BCL2A1	5.266	2.774	8.3427	-0.0856	-1.1797	1.2653
Transitory-Melanocytic (Tsoi, 2018)	CHCHD6	5.9291	4.8314	6.3454	0.3557	-1.3632	1.0075
Transitory-Melanocytic (Tsoi, 2018)	CDK5R1	3.7719	2.9165	5.7049	-0.308	-1.0414	1.3493
Transitory-Melanocytic (Tsoi, 2018)	D4S234E	3.7602	0.2987	7.3947	-0.0199	-1.2147	1.2346
Transitory-Melanocytic (Tsoi, 2018)	DSTYK	5.2536	3.7388	6.7803	-0.0032	-1.2232	1.2263
Transitory-Melanocytic (Tsoi, 2018)	ESRP1	4.1691	0.3103	5.1957	0.4489	-1.3858	0.937
Transitory-Melanocytic (Tsoi, 2018)	FAM167B	5.0704	4.0426	6.0177	0.0332	-1.241	1.2078
Transitory-Melanocytic (Tsoi, 2018)	FAM69C	1.6369	0.0566	4.1771	-0.1885	-1.1196	1.3081
Transitory-Melanocytic (Tsoi, 2018)	GAPDHS	2.3074	0.6415	2.7225	0.4637	-1.3889	0.9252
Transitory-Melanocytic (Tsoi, 2018)	GPNMB	9.8734	9.753	11.7021	-0.6385	-0.7735	1.4121
Transitory-Melanocytic (Tsoi, 2018)	GPM6B	7.1777	1.3219	7.5787	0.6358	-1.4119	0.7761
Transitory-Melanocytic (Tsoi, 2018)	GREB1	5.3183	1.6462	5.8379	0.5633	-1.405	0.8418
Transitory-Melanocytic (Tsoi, 2018)	ID4	5.3875	1.5945	5.4571	0.6877	-1.414	0.7263
Transitory-Melanocytic (Tsoi, 2018)	INPP4B	6.4411	3.225	6.7126	0.6197	-1.4107	0.7911
Transitory-Melanocytic (Tsoi, 2018)	IRF4	5.8917	0.546	6.9552	0.509	-1.3972	0.8882
Transitory-Melanocytic (Tsoi, 2018)	KAZN	3.2464	1.5558	4.1635	0.2387	-1.3265	1.0878
Transitory-Melanocytic (Tsoi, 2018)	KLF15	2.9505	0.7312	3.0942	0.6396	-1.4121	0.7725
Transitory-Melanocytic (Tsoi, 2018)	LGALS3	8.8682	8.2313	10.1364	-0.2657	-1.0701	1.3358
Transitory-Melanocytic (Tsoi, 2018)	LINGO1	6.189	0.5558	6.5204	0.6457	-1.4125	0.7668
Transitory-Melanocytic (Tsoi, 2018)	LGI3	2.5084	0.251	7.4063	-0.2947	-1.0505	1.3452
Transitory-Melanocytic (Tsoi, 2018)	LRGUK	1.4647	0.4854	1.5261	0.6417	-1.4123	0.7705
Transitory-Melanocytic (Tsoi, 2018)	MITF	6.6876	2.2079	7.2958	0.5688	-1.4057	0.8369
Transitory-Melanocytic (Tsoi, 2018)	MCC	5.0807	3.9598	6.5729	-0.1156	-1.1628	1.2785
Transitory-Melanocytic (Tsoi, 2018)	MYO10	7.059	5.0605	7.7997	0.3624	-1.365	1.0026
Transitory-Melanocytic (Tsoi, 2018)	ASAH1	9.1153	7.0067	10.503	0.1671	-1.2997	1.1326
Transitory-Melanocytic (Tsoi, 2018)	PI15	5.2334	0.2016	6.0809	0.5375	-1.4016	0.8641
Transitory-Melanocytic (Tsoi, 2018)	PPARGC1A	5.1611	3.2342	5.8674	0.3656	-1.3659	1.0003
Transitory-Melanocytic (Tsoi, 2018)	PHACTR1	4.204	0.4957	6.5314	0.1852	-1.3068	1.1216
Transitory-Melanocytic (Tsoi, 2018)	PDE3B	3.8895	0.2869	5.6011	0.2846	-1.342	1.0574
Transitory-Melanocytic (Tsoi, 2018)	PLXNC1	4.6582	0.848	4.7054	0.694	-1.4141	0.7201
Transitory-Melanocytic (Tsoi, 2018)	PRR5	3.6147	0.3674	4.1285	0.5472	-1.403	0.8557
Transitory-Melanocytic (Tsoi, 2018)	P2RX7	5.7589	1.2327	7.3172	0.3834	-1.3706	0.9872
Transitory-Melanocytic (Tsoi, 2018)	RAP1GAP	4.8909	0.7991	5.3796	0.5848	-1.4075	0.8227
Transitory-Melanocytic (Tsoi, 2018)	RASSF3	6.7242	5.3143	6.9045	0.5765	-1.4066	0.8301
Transitory-Melanocytic (Tsoi, 2018)	SCUBE2	1.0356	0.9336	2.1276	-0.6106	-0.7994	1.41
Transitory-Melanocytic (Tsoi, 2018)	SLC45A2	5.1526	2.5084	6.387	0.2905	-1.3439	1.0534
Transitory-Melanocytic (Tsoi, 2018)	STXBP6	4.696	2.8258	5.5521	0.2969	-1.3459	1.049
Transitory-Melanocytic (Tsoi, 2018)	TBC1D16	6.4405	3.8904	7.592	0.3014	-1.3473	1.0459
Transitory-Melanocytic (Tsoi, 2018)	TBC1D7	7.6966	6.7237	8.753	-0.0336	-1.2076	1.2412
Transitory-Melanocytic (Tsoi, 2018)	TMCC2	3.6971	2.6064	6.6769	-0.366	-1	1.366
Transitory-Melanocytic (Tsoi, 2018)	TTYH2	4.8263	0.585	6.4216	0.3581	-1.3639	1.0058
Transitory-Melanocytic (Tsoi, 2018)	TYR	9.3105	2.5993	11.7463	0.3685	-1.3667	0.9982
Transitory-Melanocytic (Tsoi, 2018)	TYRP1	5.4512	1.5801	11.5711	-0.1822	-1.1234	1.3057
Transitory-Melanocytic (Tsoi, 2018)	WFDC1	4.3834	0.2141	4.8146	0.6006	-1.4091	0.8085
Transitory-Melanocytic (Tsoi, 2018)	ZNF704	3.5135	0.4222	4.5447	0.392	-1.3728	0.9807
Transitory-Melanocytic (Tsoi, 2018)	TUBB4A	5.1946	0.6229	6.2668	0.4766	-1.3914	0.9148
Neural crest-like-Transitory (Tsoi, 2018)	ABCA8	3.717	0.111	4.2758	0.5503	-1.4034	0.8531
Neural crest-like-Transitory (Tsoi, 2018)	BAALC	5.2687	1.4168	6.6109	0.38	-1.3697	0.9897
Neural crest-like-Transitory (Tsoi, 2018)	EPHB3	4.4168	0.251	4.4489	0.699	-1.4142	0.7152
Neural crest-like-Transitory (Tsoi, 2018)	LOXL3	6.8074	1.0635	7.2209	0.6322	-1.4117	0.7794
Neural crest-like-Transitory (Tsoi, 2018)	PTPRZ1	5.627	0.9635	7.9177	0.2733	-1.3383	1.065
Neural crest-like-Transitory (Tsoi, 2018)	PCDH1	3.5509	1.7093	6.4782	-0.1843	-1.1222	1.3064
Neural crest-like-Transitory (Tsoi, 2018)	RFTN2	3.3896	0.275	4.6628	0.333	-1.3568	1.0238
Neural crest-like (Tsoi, 2018)	CTSS	2.2203	2.1276	4.3847	-0.6622	-0.7511	1.4133
Neural crest-like (Tsoi, 2018)	CCL2	2.4168	1.1375	6.7018	-0.421	-0.9587	1.3797
Neural crest-like (Tsoi, 2018)	CYB5R2	1.3505	0.9184	1.4647	0.4505	-1.3862	0.9357
Neural crest-like (Tsoi, 2018)	FLT1	0.757	0.0144	1.1827	0.2189	-1.3194	1.1006
Neural crest-like (Tsoi, 2018)	GLI2	2.5185	0.9411	4.3674	-0.0646	-1.1912	1.2558
Neural crest-like (Tsoi, 2018)	KIAA1755	2.2079	0.5261	3.9317	-0.0101	-1.2197	1.2297
Neural crest-like (Tsoi, 2018)	NES	7.3543	4.2118	8.8962	0.2737	-1.3384	1.0647
Neural crest-like (Tsoi, 2018)	STK32B	5.0764	0.4005	5.1747	0.6849	-1.414	0.7291
Neural crest-like (Tsoi, 2018)	SLITRK6	1.3561	0.1506	5.5524	-0.4306	-0.9513	1.3819
Neural crest-like (Tsoi, 2018)	ST8SIA5	0.6135	0.2016	3.3604	-0.5551	-0.8489	1.404
Neural crest-like (Tsoi, 2018)	TFAP2C	3.254	0.4542	4.2265	0.3809	-1.3699	0.989
Neural crest-like (Tsoi, 2018)	WNT5A	0.2141	0.111	0.757	-0.5174	-0.8812	1.3985
Undifferentiated-Neural crest-like (Tsoi, 2018)	FBLIM1	4.6904	4.6305	5.2954	-0.605	-0.8045	1.4095
Undifferentiated-Neural crest-like (Tsoi, 2018)	LAMB3	3.9373	3.4289	4.8875	-0.2436	-1.0846	1.3282
Undifferentiated-Neural crest-like (Tsoi, 2018)	PTX3	2.1538	0.3785	4.2787	-0.0731	-1.1866	1.2597
Undifferentiated-Neural crest-like (Tsoi, 2018)	STAC	0.8156	0.3219	1.0704	0.2562	-1.3326	1.0764
Undifferentiated-Neural crest-like (Tsoi, 2018)	SYNPO	3.2585	2.433	3.6473	0.2875	-1.3429	1.0554
Undifferentiated-Neural crest-like (Tsoi, 2018)	TLE4	1.9964	1.9598	2.5607	-0.6395	-0.7726	1.4121
vMel (Belote, 2021)	NTRK2	0.0704	0.0426	0.1243	-0.2575	-1.0756	1.333
MSC (Belote, 2021)	MSX1	3.5173	2.3161	3.7366	0.5242	-1.3996	0.8754
MSC (Belote, 2021)	MMP2	8.6265	7.2971	9.8654	0.0288	-1.2389	1.2101
MSC (Belote, 2021)	TIMP3	9.261	4.3009	9.4434	0.6685	-1.4135	0.745
MSC (Belote, 2021)	LOC400043	4.0312	0.2869	5.3906	0.3684	-1.3667	0.9983
MSC (Belote, 2021)	CD248	2.0036	0.251	4.1922	-0.0901	-1.1772	1.2673
MSC (Belote, 2021)	WNT5A	0.2141	0.111	0.757	-0.5174	-0.8812	1.3985
MSC (Belote, 2021)	COL3A1	2.3923	0.263	4.7032	-0.0334	-1.2077	1.2411
Undifferentiated (Tsoi, 2018)	TBL1X	3.0339	3.0321	3.568	-0.7036	-0.7106	1.4142
cMel (Belote, 2021)	MCOLN3	3.6241	1.9411	4.5705	0.2258	-1.3219	1.0961
cMel (Belote, 2021)	HPGD	4.9805	0.8156	8.6029	0.0568	-1.2522	1.1953
cMel (Belote, 2021)	SLC45A2	5.1526	2.5084	6.387	0.2905	-1.3439	1.0534
cMel (Belote, 2021)	AKAP12	6.8371	7.4625	6.4311	-0.1724	1.3018	-1.1294
cMel (Belote, 2021)	SEMA5A	4.9639	0.433	5.0815	0.6798	-1.4139	0.7341
cMel (Belote, 2021)	APCDD1	3.4738	0.0841	2.9373	0.8797	-1.3988	0.5191
Transitory (Tsoi, 2018)	LRRTM4	2.6713	0.0144	4.1424	0.2314	-1.3239	1.0925
Transitory (Tsoi, 2018)	LSAMP	4.9269	1.7782	5.3754	0.5624	-1.4049	0.8426
Transitory (Tsoi, 2018)	MAMDC2	3.846	0.4751	7.2052	0.0014	-1.2255	1.224
Transitory (Tsoi, 2018)	MCAM	8.8502	6.0496	9.1425	0.5997	-1.409	0.8093
Transitory (Tsoi, 2018)	NELL1	2.5484	0.0286	3.5753	0.334	-1.3571	1.0231
Transitory (Tsoi, 2018)	PCSK6	0.8953	0.3674	2.6871	-0.4243	-0.9561	1.3805
Transitory (Tsoi, 2018)	PCDH7	5.4236	1.6915	7.7	0.1959	-1.3109	1.115
Transitory (Tsoi, 2018)	RAPGEF4	1.8237	0.2987	3.8639	-0.1176	-1.1617	1.2793
Transitory (Tsoi, 2018)	SEMA3E	1.3161	0.2016	1.9855	0.2017	-1.3131	1.1114
Transitory (Tsoi, 2018)	XYLT1	3.904	1.9184	5.7282	0.0346	-1.2417	1.2071
Transitory (Tsoi, 2018)	SOD3	2.0875	5.319	5.0917	-1.4114	0.7829	0.6285
Transitory (Tsoi, 2018)	BCHE	6.6324	3.9439	8.8555	0.0773	-1.2615	1.1843
Transitory (Tsoi, 2018)	ALDH1A1	7.9491	1.0772	7.0612	0.8476	-1.4042	0.5566
ADT (Belote, 2021)	APOD	9.8029	2.8319	7.5683	1.0558	-1.3427	0.2869
ADT (Belote, 2021)	NKAPP1	1.3045	0.0426	0.8797	1.0725	-1.3346	0.2621
ADT (Belote, 2021)	FXYD3	7.5272	1	4.969	1.1278	-1.3029	0.1751
NEO (Belote, 2021)	SEC11C	8.5521	6.0887	7.6687	1.0948	-1.3227	0.2279
NEO (Belote, 2021)	ALDH9A1	6.7358	6.4138	6.463	1.3999	-0.8738	-0.5261
NEO (Belote, 2021)	CHAF1A	5.1969	5.0072	5.1518	0.9675	-1.377	0.4096
NEO (Belote, 2021)	PSMC2	6.998	6.5481	6.8202	1.131	-1.3008	0.1699
NEO (Belote, 2021)	CA14	7.0983	0.9561	5.8802	0.924	-1.3892	0.4652
NEO (Belote, 2021)	TBC1D22A	5.0241	4.269	4.6017	1.2703	-1.1734	-0.0969
NEO (Belote, 2021)	TMEM192	5.009	3.1603	4.8037	0.8275	-1.4069	0.5794
NEO (Belote, 2021)	LOC100506207	1.5059	0.4957	0.5059	1.4142	-0.7178	-0.6963
NEO (Belote, 2021)	XPNPEP1	6.6793	5.4995	6.1683	1.1667	-1.2755	0.1089
NEO (Belote, 2021)	OSGEP	4.862	4.1326	4.4236	1.2984	-1.1346	-0.1639
NEO (Belote, 2021)	RAB38	7.5129	5.14	7.3204	0.7946	-1.4104	0.6158
NEO (Belote, 2021)	BECN1	7.0234	5.9757	6.9669	0.7649	-1.4126	0.6477
FET (Belote, 2021)	SEMA4D	1.8679	0.5656	0.9635	1.3499	-1.04	-0.3099
FET (Belote, 2021)	ASXL1	5.478	4.9612	5.3992	0.8734	-1.4	0.5266
FET (Belote, 2021)	NID1	8.8457	3.0942	5.7131	1.2595	-1.1867	-0.0728
FET (Belote, 2021)	SYK	4.0644	0.0841	3.0858	0.9761	-1.3743	0.3982
FET (Belote, 2021)	RASGEF1C	1.2388	0.0286	1.0704	0.8586	-1.4025	0.5439
FET (Belote, 2021)	FAM126A	5.6188	5.4861	5.4919	1.4132	-0.7538	-0.6594
FET (Belote, 2021)	PRKCE	4.9491	3.1194	4.7677	0.8144	-1.4085	0.594
FET (Belote, 2021)	SESN3	6.984	2.0566	6.751	0.7578	-1.413	0.6552
FET (Belote, 2021)	TMSB4X	12.6287	6.8193	8.2981	1.3711	-0.9855	-0.3856
FET (Belote, 2021)	ARHGDIB	8.6496	5.202	7.4219	1.0923	-1.3241	0.2318
FET (Belote, 2021)	MGP	9.3171	2.1699	9.1871	0.7265	-1.414	0.6876
Melanocytic (Tsoi, 2018)	APOLD1	5.0553	1.263	2.5286	1.3361	-1.0694	-0.2667
Melanocytic (Tsoi, 2018)	ABCD1	6.1071	3.942	5.4057	1.0594	-1.341	0.2817
Melanocytic (Tsoi, 2018)	CEACAM1	5.3082	0.2141	1.8875	1.3388	-1.0641	-0.2747
Melanocytic (Tsoi, 2018)	GFOD1	1.903	0.4114	1.6554	0.8883	-1.3971	0.5088
Melanocytic (Tsoi, 2018)	IL16	3.3576	1.0356	2.0286	1.2794	-1.1616	-0.1178
Melanocytic (Tsoi, 2018)	MAT1A	1.0841	0	0.6041	1.1755	-1.2687	0.0933
Melanocytic (Tsoi, 2018)	MYO1D	6.4311	1.3277	6.0418	0.7894	-1.4109	0.6215
Melanocytic (Tsoi, 2018)	NR4A3	2.025	0.3561	1.7866	0.8627	-1.4018	0.5391
Melanocytic (Tsoi, 2018)	SEMA6A	6.1603	0.8237	5.4416	0.8536	-1.4033	0.5497
Melanocytic (Tsoi, 2018)	TPPP	3.0321	0.3785	1.5993	1.256	-1.1909	-0.0652
Transitory-Melanocytic (Tsoi, 2018)	ADCY1	5.4973	0.757	1.3896	1.4035	-0.8523	-0.5512
Transitory-Melanocytic (Tsoi, 2018)	APOC1	7.883	3.254	4.5248	1.3634	-1.0071	-0.3563
Transitory-Melanocytic (Tsoi, 2018)	APOE	9.6732	3.2913	9.6349	0.7135	-1.4142	0.7007
Transitory-Melanocytic (Tsoi, 2018)	BEST1	5.9745	0.5261	4.8359	0.9357	-1.3862	0.4505
Transitory-Melanocytic (Tsoi, 2018)	BCAS3	7.3873	3.3937	5.8768	1.1144	-1.3113	0.1969
Transitory-Melanocytic (Tsoi, 2018)	MERTK	5.5033	0.5945	0.9782	1.4107	-0.7914	-0.6193
Transitory-Melanocytic (Tsoi, 2018)	CAPN3	8.8064	2.9222	4.8192	1.3418	-1.0577	-0.2841
Transitory-Melanocytic (Tsoi, 2018)	CA14	7.0983	0.9561	5.8802	0.924	-1.3892	0.4652
Transitory-Melanocytic (Tsoi, 2018)	CARD14	3.1827	0.8074	2.3477	1.0877	-1.3266	0.2389
Transitory-Melanocytic (Tsoi, 2018)	CITED1	5.8907	0.9336	4.4283	1.0289	-1.3547	0.3257
Transitory-Melanocytic (Tsoi, 2018)	CHL1	5.3205	0.1506	1.281	1.3833	-0.9463	-0.437
Transitory-Melanocytic (Tsoi, 2018)	CHN2	4.0626	0.9336	0.9709	1.4141	-0.7198	-0.6944
Transitory-Melanocytic (Tsoi, 2018)	C11orf96	4.4243	1.0566	3.1227	1.1225	-1.3063	0.1838
Transitory-Melanocytic (Tsoi, 2018)	CHCHD10	7.7448	6.5149	7.142	1.2166	-1.2327	0.0162
Transitory-Melanocytic (Tsoi, 2018)	CELF2	5.2246	0.7225	3.645	1.087	-1.327	0.24
Transitory-Melanocytic (Tsoi, 2018)	DAPK1	5.1599	1.8875	4.3363	0.9824	-1.3722	0.3898
Transitory-Melanocytic (Tsoi, 2018)	DCT	13.0606	4.1301	10.3618	1.0365	-1.3514	0.3149
Transitory-Melanocytic (Tsoi, 2018)	DUSP15	3.2972	0.263	2.5361	0.9815	-1.3725	0.391
Transitory-Melanocytic (Tsoi, 2018)	FMN1	5.8143	4.5129	5.7175	0.7872	-1.4111	0.6238
Transitory-Melanocytic (Tsoi, 2018)	GPRC5B	7.3296	3.4893	5.9937	1.0839	-1.3286	0.2447
Transitory-Melanocytic (Tsoi, 2018)	GYG2	6.8044	0.6871	5.025	1.0245	-1.3565	0.332
Transitory-Melanocytic (Tsoi, 2018)	GAB2	5.1127	3.9165	4.9672	0.8392	-1.4054	0.5662
Transitory-Melanocytic (Tsoi, 2018)	GDF15	9.4042	2.8856	9.2273	0.7361	-1.4138	0.6777
Transitory-Melanocytic (Tsoi, 2018)	GHR	4.3916	0.5945	0.6323	1.4142	-0.7177	-0.6965
Transitory-Melanocytic (Tsoi, 2018)	HPS4	6.787	5.1127	5.6112	1.3535	-1.0318	-0.3217
Transitory-Melanocytic (Tsoi, 2018)	HAS2	3.4751	2.7613	2.7803	1.4138	-0.7356	-0.6783
Transitory-Melanocytic (Tsoi, 2018)	IGSF11	6.0437	0.2869	4.7544	0.9522	-1.3816	0.4295
Transitory-Melanocytic (Tsoi, 2018)	IRX6	4.0365	1.7398	1.9373	1.41	-0.8	-0.61
Transitory-Melanocytic (Tsoi, 2018)	LAMC3	1.6229	0.0144	0.5361	1.3409	-1.0597	-0.2812
Transitory-Melanocytic (Tsoi, 2018)	LDB3	3.2765	0.1635	2.8379	0.8605	-1.4022	0.5417
Transitory-Melanocytic (Tsoi, 2018)	MFAP3L	3.8679	1.9598	3.7431	0.7775	-1.4118	0.6343
Transitory-Melanocytic (Tsoi, 2018)	MBP	7.2289	4.9832	5.8866	1.2963	-1.1377	-0.1586
Transitory-Melanocytic (Tsoi, 2018)	GNPTAB	7.3187	5.2698	6.8618	0.9511	-1.382	0.4309
Transitory-Melanocytic (Tsoi, 2018)	NAT8L	4.4777	1.6462	4.1127	0.8472	-1.4043	0.557
Transitory-Melanocytic (Tsoi, 2018)	NRG3	3.7866	0.111	1.1243	1.3629	-1.0083	-0.3546
Transitory-Melanocytic (Tsoi, 2018)	PMP2	6.306	0.3448	2.7115	1.2997	-1.1327	-0.167
Transitory-Melanocytic (Tsoi, 2018)	PLA1A	7.3381	0.7312	2.266	1.3789	-0.9613	-0.4176
Transitory-Melanocytic (Tsoi, 2018)	PLEKHH1	5.921	1.8278	3.0652	1.3514	-1.0367	-0.3147
Transitory-Melanocytic (Tsoi, 2018)	PMEL	11.8487	4.0063	8.0297	1.214	-1.2352	0.0213
Transitory-Melanocytic (Tsoi, 2018)	QDPR	7.2284	6.4938	6.931	1.1402	-1.2946	0.1544
Transitory-Melanocytic (Tsoi, 2018)	RAB38	7.5129	5.14	7.3204	0.7946	-1.4104	0.6158
Transitory-Melanocytic (Tsoi, 2018)	RRAGD	4.986	4.116	4.7479	1.0061	-1.3638	0.3577
Transitory-Melanocytic (Tsoi, 2018)	RENBP	6.6536	6.2426	6.611	0.8194	-1.4079	0.5885
Transitory-Melanocytic (Tsoi, 2018)	RLBP1	5.3092	0.1506	0.7824	1.4053	-0.8401	-0.5651
Transitory-Melanocytic (Tsoi, 2018)	STK32A	4.2227	0.4647	3.9644	0.7811	-1.4115	0.6304
Transitory-Melanocytic (Tsoi, 2018)	SIRPA	6.3105	5.2044	6.0796	0.9355	-1.3862	0.4508
Transitory-Melanocytic (Tsoi, 2018)	SLC24A5	7.8585	0.9782	7.0197	0.8395	-1.4054	0.5658
Transitory-Melanocytic (Tsoi, 2018)	SOX6	5.2098	0.903	4.9146	0.7809	-1.4115	0.6306
Transitory-Melanocytic (Tsoi, 2018)	ST3GAL6	6.7367	3.0892	5.7522	1.0021	-1.3652	0.3631
Transitory-Melanocytic (Tsoi, 2018)	ST8SIA1	3.4087	0.848	1.6088	1.3537	-1.0312	-0.3226
Transitory-Melanocytic (Tsoi, 2018)	TMC6	7.4491	3.2234	5.7285	1.1424	-1.2931	0.1507
Transitory-Melanocytic (Tsoi, 2018)	GALNT3	4.281	0.1635	2.1473	1.2393	-1.2096	-0.0297
Transitory-Melanocytic (Tsoi, 2018)	VAT1	10.3143	9.2007	9.6428	1.2997	-1.1327	-0.167
Transitory-Melanocytic (Tsoi, 2018)	UBAP1L	4.843	0.7824	0.8797	1.4139	-0.7327	-0.6812
Transitory-Melanocytic (Tsoi, 2018)	MOB3B	4.8723	0.3896	1.6826	1.3576	-1.022	-0.3356
Neural crest-like-Transitory (Tsoi, 2018)	FREM1	3.8074	0.0426	0.6415	1.3986	-0.8806	-0.518
Neural crest-like-Transitory (Tsoi, 2018)	FREM2	4.254	0.0566	2.0635	1.2422	-1.2065	-0.0357
Neural crest-like-Transitory (Tsoi, 2018)	GRIK2	5.7584	0.4957	5.7347	0.7119	-1.4142	0.7023
Neural crest-like-Transitory (Tsoi, 2018)	GAS7	7.9984	1.0496	7.3414	0.8094	-1.409	0.5996
Neural crest-like-Transitory (Tsoi, 2018)	LAMA4	8.2677	4.4666	6.6129	1.1687	-1.274	0.1053
Neural crest-like-Transitory (Tsoi, 2018)	LGI4	5.4036	0.4751	4.7756	0.8456	-1.4045	0.5589
Neural crest-like-Transitory (Tsoi, 2018)	SERPINA5	8.7091	1.373	1.585	1.4138	-0.738	-0.6758
Neural crest-like-Transitory (Tsoi, 2018)	SLC35F1	4.8395	0.2388	2.4168	1.2459	-1.2025	-0.0434
Neural crest-like-Transitory (Tsoi, 2018)	SORCS1	4.4783	0.0841	4.3176	0.7462	-1.4135	0.6672
Neural crest-like (Tsoi, 2018)	CHST1	0.6781	0.0426	0.4436	1.1052	-1.3167	0.2115
Neural crest-like (Tsoi, 2018)	CD96	3.2418	0.1506	1.2327	1.3274	-1.0861	-0.2413
Neural crest-like (Tsoi, 2018)	CADM1	5.8507	1.4005	4.3937	1.0629	-1.3393	0.2764
Neural crest-like (Tsoi, 2018)	CADM3	2.7845	0.0426	1.8319	1.0835	-1.3288	0.2454
Neural crest-like (Tsoi, 2018)	CSRP2	5.1056	4.1359	5.076	0.7398	-1.4137	0.6739
Neural crest-like (Tsoi, 2018)	GDNF	4.8861	3.5236	4.4951	1.0204	-1.3582	0.3378
Neural crest-like (Tsoi, 2018)	HHEX	4.8001	2.4957	3.4209	1.2968	-1.137	-0.1598
Neural crest-like (Tsoi, 2018)	ITGB8	5.2795	3.2126	3.5705	1.3955	-0.8962	-0.4994
Neural crest-like (Tsoi, 2018)	MUC5B	0.3561	0.0566	0.189	1.2692	-1.1749	-0.0943
Neural crest-like (Tsoi, 2018)	PMEPA1	4.8465	4.5103	4.7404	1.0507	-1.3451	0.2945
Neural crest-like (Tsoi, 2018)	SEMA3B	6.4401	5.0583	6.2475	0.8588	-1.4025	0.5437
Neural crest-like (Tsoi, 2018)	SULF1	4.5141	0.1763	0.7398	1.4041	-0.8484	-0.5557
Neural crest-like (Tsoi, 2018)	TSPAN13	3.706	3.0479	3.2434	1.3538	-1.0311	-0.3227
Neural crest-like (Tsoi, 2018)	TGFA	7.0997	1.0356	1.2987	1.4132	-0.7536	-0.6596
Undifferentiated-Neural crest-like (Tsoi, 2018)	SLFN11	4.5021	3.5838	4.4489	0.7693	-1.4123	0.643
Undifferentiated-Neural crest-like (Tsoi, 2018)	STRA6	2.9653	0.275	0.5945	1.4058	-0.8361	-0.5698
vMel (Belote, 2021)	MIA	6.5868	1.5898	4.8248	1.0887	-1.326	0.2373
vMel (Belote, 2021)	ID3	6.6803	2.4594	3.6871	1.3565	-1.0245	-0.332
MSC (Belote, 2021)	IGFBP5	11.448	4.7442	6.7038	1.3559	-1.0261	-0.3298
MSC (Belote, 2021)	TBX15	5.6764	0.1763	0.7312	1.4083	-0.8163	-0.5919
MSC (Belote, 2021)	ID3	6.6803	2.4594	3.6871	1.3565	-1.0245	-0.332
Undifferentiated (Tsoi, 2018)	ZIC2	0.3448	0.251	0.263	1.4043	-0.8469	-0.5574
cMel (Belote, 2021)	ACP5	7.105	1.8156	6.1729	0.8996	-1.3948	0.4953
cMel (Belote, 2021)	RGL1	5.0959	3.4699	4.9383	0.812	-1.4087	0.5967
Transitory (Tsoi, 2018)	ANO4	4.6041	0.926	2.2016	1.3292	-1.0829	-0.2463
Transitory (Tsoi, 2018)	CX3CL1	5.3023	0.2388	2.7592	1.2266	-1.2229	-0.0037
Transitory (Tsoi, 2018)	COL11A2	3.4515	0.275	1.4383	1.3183	-1.1024	-0.2159
Transitory (Tsoi, 2018)	EBF3	5.5717	0.189	0.4222	1.4132	-0.7535	-0.6597
Transitory (Tsoi, 2018)	FXYD3	7.5272	1	4.969	1.1278	-1.3029	0.1751
Transitory (Tsoi, 2018)	GDF11	6.4983	3.6369	5.6002	1.0488	-1.346	0.2972
Transitory (Tsoi, 2018)	MMP15	9.0877	2.4983	8.0322	0.8818	-1.3984	0.5166
Transitory (Tsoi, 2018)	RNASE1	8.481	1.3951	4.8861	1.2307	-1.2187	-0.012
Transitory (Tsoi, 2018)	SELENBP1	6.8342	5.0175	6.7085	0.7816	-1.4115	0.6299
Transitory (Tsoi, 2018)	SORL1	4.0875	0.3896	3.9001	0.7615	-1.4128	0.6513
Transitory (Tsoi, 2018)	TSPAN7	6.8669	0.774	1.263	1.4105	-0.7937	-0.6168
Transitory (Tsoi, 2018)	SCRG1	5.9357	0.3219	4.925	0.9038	-1.3939	0.4901

## Sheet: Signature_Ranks
Melanoma cell-state signatures — Mean z-score and rank per PDX model
Signature score = mean gene-wise z-score across all 580 signature genes per PDX model. Rank 1 = highest mean z-score (most active). Scores and ranks computed from cross-sample z-scores in Signature_Heatmap sheet.
Signature	MM27 mean z	MM27 rank	MM13 mean z	MM13 rank	MM16 mean z	MM16 rank
Undifferentiated (Tsoi, 2018)	-0.2456	12	0.9014	1	-0.6557	13
Undifferentiated-Neural crest-like (Tsoi, 2018)	-0.676	13	0.8446	2	-0.1686	12
Neural crest-like (Tsoi, 2018)	0.0958	8	-0.3023	5	0.2065	10
Neural crest-like-Transitory (Tsoi, 2018)	0.4607	3	-0.8615	10	0.4008	5
Transitory (Tsoi, 2018)	0.5827	2	-1.1611	12	0.5784	1
Transitory-Melanocytic (Tsoi, 2018)	0.7085	1	-1.1618	13	0.4533	3
Melanocytic (Tsoi, 2018)	0.1736	6	-0.4031	7	0.2296	8
MSC (Belote, 2021)	-0.1434	11	-0.1297	4	0.273	6
FET (Belote, 2021)	0.09	9	-0.512	9	0.422	4
NEO (Belote, 2021)	0.2276	5	-0.4498	8	0.2223	9
ADT (Belote, 2021)	0.016	10	-0.0051	3	-0.0109	11
vMel (Belote, 2021)	0.1506	7	-0.3852	6	0.2345	7
cMel (Belote, 2021)	0.459	4	-1.029	11	0.5701	2

## Sheet: MITF_AXL_Values
MITF and AXL expression per PDX model
log₂(TPM+1) values used for MITF–AXL index calculation.
Gene	MM13 log₂(TPM+1)	MM27 log₂(TPM+1)	MM16 log₂(TPM+1)
MITF	2.2079	6.6876	7.2958
AXL	8.8791	2.5705	4.5065

## Sheet: MITF_AXL_Index
MITF–AXL index per PDX model
MITF–AXL index = log₂(TPM+1)_MITF − log₂(TPM+1)_AXL. Positive = MITF-enriched (differentiated); Negative = AXL-enriched (invasive).
PDX	MITF–AXL index
MM13	-6.6712
MM27	4.1172
MM16	2.7893
