# Supplementary material
Source: Research Square preprint supplement (doi:10.21203/rs.3.rs-9577216/v1)
Supplement: Supplementary file 5 [file 65cef1534b6e322f1f857cfd.xlsx]

## Sheet: INDEX
Supplementary Table 11. GSEA Results | MM27 and MM13 | Aur vs. DMSO, Vol vs. DMSO, Vol+Aur vs. DMSO
GSEA v4.4.0, GseaPreranked, Signal2Noise, descending, No Collapse, gene set permutation 1,000×, weighted p=1. Databases: MSigDB Hallmark 2026, Reactome 2026, WikiPathways 2026. Bold = pathway shown in Fig. 5B or Supplementary Fig. 5F/5G.
Sheet	Model	Comparison	Databases	FDR<0.25	FDR<0.05	In figure	Figure reference
MM27_Aur_vs_DMSO	MM27	Aur vs. DMSO	Hallmarks+Reactome+WikiPathways (2026)	334	196	11	Supplementary Fig. 5F
MM27_Vol_vs_DMSO	MM27	Vol vs. DMSO	Hallmarks+Reactome+WikiPathways (2026)	27	4	2	Supplementary Fig. 5G
MM27_Vol+Aur_vs_DMSO	MM27	Vol+Aur vs. DMSO	Hallmarks+Reactome+WikiPathways (2026)	597	315	3	Fig. 5B
MM13_Aur_vs_DMSO	MM13	Aur vs. DMSO	Hallmarks+Reactome+WikiPathways (2026)	181	73	11	Supplementary Fig. 5F
MM13_Vol_vs_DMSO	MM13	Vol vs. DMSO	Hallmarks+Reactome+WikiPathways (2026)	163	37	2	Supplementary Fig. 5G
MM13_Vol+Aur_vs_DMSO	MM13	Vol+Aur vs. DMSO	Hallmarks+Reactome+WikiPathways (2026)	240	91	3	Fig. 5B

## Sheet: MM27_Aur_vs_DMSO
GSEA — Aur vs. DMSO | MM27 | Hallmark 2026, Reactome 2026, WikiPathways 2026 | Sorted by NES | Bold = Supplementary Fig. 5F
NES = Normalized Enrichment Score. FDR < 0.05 highlighted in green. Pathways in Supplementary Fig. 5F in bold blue. FDR < 0.25 = standard GSEA threshold.
Database	Pathway (original ID)	Pathway (readable)	Gene set size	ES	NES	NOM p-val	FDR q-val	FWER p-val	Rank at max	Leading edge
Reactome	REACTOME_TNFR2_NON_CANONICAL_NF_KB_PATHWAY	Tnfr2 Non Canonical Nf Kb Pathway	64	0.7388	2.7783	0	0	0	1979	tags=59%, list=13%, signal=68%
Reactome	REACTOME_NUCLEAR_EVENTS_MEDIATED_BY_NFE2L2	Nuclear Events Mediated By Nfe2L2	82	0.7106	2.7672	0	0	0	1510	tags=54%, list=10%, signal=59%
Reactome	REACTOME_KEAP1_NFE2L2_PATHWAY	Keap1 Nfe2L2 Pathway	107	0.6543	2.6569	0	0	0	1979	tags=49%, list=13%, signal=56%
Hallmarks	HALLMARK_TNFA_SIGNALING_VIA_NFKB	Tnfa Signaling Via Nfkb	164	0.5978	2.5942	0	0	0	1610	tags=38%, list=11%, signal=42%
Reactome	REACTOME_DECTIN_1_MEDIATED_NONCANONICAL_NF_KB_SIGNALING	Dectin 1 Mediated Noncanonical Nf Kb Signaling	46	0.7337	2.5567	0	0	0	1979	tags=63%, list=13%, signal=73%
Reactome	REACTOME_ACTIVATION_OF_NF_KAPPAB_IN_B_CELLS	Activation Of Nf Kappab In B Cells	52	0.7058	2.5558	0	0	0	3528	tags=77%, list=24%, signal=101%
Reactome	REACTOME_SPOP_MEDIATED_PROTEASOMAL_DEGRADATION_OF_PD_L1_CD274	Spop Mediated Proteasomal Degradation Of Pd L1 Cd274	44	0.7296	2.5233	0	0	0	2118	tags=66%, list=14%, signal=77%
Reactome	REACTOME_VIF_MEDIATED_DEGRADATION_OF_APOBEC3G	Vif Mediated Degradation Of Apobec3G	40	0.7354	2.4982	0	0	0	3472	tags=88%, list=24%, signal=114%
Reactome	REACTOME_UBIQUITIN_MEDIATED_DEGRADATION_OF_PHOSPHORYLATED_CDC25A	Ubiquitin Mediated Degradation Of Phosphorylated Cdc25A	49	0.703	2.4781	0	0	0	3698	tags=80%, list=25%, signal=106%
Reactome	REACTOME_GSK3B_MEDIATED_PROTEASOMAL_DEGRADATION_OF_PD_L1_CD274	Gsk3B Mediated Proteasomal Degradation Of Pd L1 Cd274	42	0.722	2.467	0	0	0	3528	tags=86%, list=24%, signal=112%
Reactome	REACTOME_REGULATION_OF_ORNITHINE_DECARBOXYLASE_ODC	Regulation Of Ornithine Decarboxylase Odc	36	0.7473	2.4653	0	0	0	3472	tags=92%, list=24%, signal=120%
Reactome	REACTOME_REGULATION_OF_APOPTOSIS	Regulation Of Apoptosis	39	0.7183	2.4518	0	0	0	3472	tags=82%, list=24%, signal=107%
Reactome	REACTOME_INTERLEUKIN_1_SIGNALING	Interleukin 1 Signaling	91	0.6058	2.4326	0	0	0	1979	tags=44%, list=13%, signal=50%
WikiPathways	WP_NRF2_PATHWAY	Nrf2 Pathway	80	0.6222	2.4279	0	0	0	1473	tags=41%, list=10%, signal=46%
Reactome	REACTOME_CELLULAR_RESPONSE_TO_CHEMICAL_STRESS	Cellular Response To Chemical Stress	162	0.5532	2.4262	0	0	0	2192	tags=37%, list=15%, signal=43%
Reactome	REACTOME_UBIQUITIN_DEPENDENT_DEGRADATION_OF_CYCLIN_D	Ubiquitin Dependent Degradation Of Cyclin D	38	0.7219	2.4146	0	0	0	1979	tags=66%, list=13%, signal=76%
Reactome	REACTOME_PROTEASOME_ASSEMBLY	Proteasome Assembly	47	0.684	2.4083	0	0	0	1979	tags=57%, list=13%, signal=66%
Reactome	REACTOME_ABC_TRANSPORTER_DISORDERS	Abc Transporter Disorders	52	0.6717	2.399	0	0	0	1979	tags=56%, list=13%, signal=64%
Reactome	REACTOME_SOMITOGENESIS	Somitogenesis	38	0.7247	2.3983	0	0	0	1979	tags=66%, list=13%, signal=76%
Reactome	REACTOME_REGULATION_OF_PD_L1_CD274_POST_TRANSLATIONAL_MODIFICATION	Regulation Of Pd L1 Cd274 Post Translational Modification	78	0.6122	2.3907	0	0	0	3831	tags=64%, list=26%, signal=86%
Reactome	REACTOME_DEGRADATION_OF_GLI1_BY_THE_PROTEASOME	Degradation Of Gli1 By The Proteasome	44	0.6879	2.3891	0	0	0	3528	tags=80%, list=24%, signal=104%
WikiPathways	WP_PHOTODYNAMIC_THERAPYINDUCED_NFE2L2_NRF2_SURVIVAL_SIGNALING	Photodynamic Therapyinduced Nfe2L2 Nrf2 Survival Signaling	20	0.8348	2.3868	0	0	0	554	tags=50%, list=4%, signal=52%
Reactome	REACTOME_HH_MUTANTS_ABROGATE_LIGAND_SECRETION	Hh Mutants Abrogate Ligand Secretion	42	0.695	2.3768	0	0	0	3472	tags=81%, list=24%, signal=106%
Reactome	REACTOME_AMPK_INDUCED_ERAD_AND_LYSOSOME_MEDIATED_DEGRADATION_OF_PD_L1_CD274	Ampk Induced Erad And Lysosome Mediated Degradation Of Pd L1 Cd274	50	0.676	2.3718	0	0	0	1979	tags=54%, list=13%, signal=62%
WikiPathways	WP_PROTEASOME_DEGRADATION	Proteasome Degradation	52	0.6631	2.3679	0	0	0	1979	tags=56%, list=13%, signal=64%
Reactome	REACTOME_DEGRADATION_OF_AXIN	Degradation Of Axin	41	0.6941	2.367	0	0	0	3472	tags=78%, list=24%, signal=102%
Reactome	REACTOME_CROSS_PRESENTATION_OF_SOLUBLE_EXOGENOUS_ANTIGENS_ENDOSOMES	Cross Presentation Of Soluble Exogenous Antigens Endosomes	35	0.7252	2.3625	0	0	0	1979	tags=66%, list=13%, signal=76%
Reactome	REACTOME_STABILIZATION_OF_P53	Stabilization Of P53	43	0.6904	2.3526	0	4.63435e-05	0.001	3472	tags=74%, list=24%, signal=97%
Reactome	REACTOME_NEGATIVE_REGULATION_OF_NOTCH4_SIGNALING	Negative Regulation Of Notch4 Signaling	42	0.6928	2.3523	0	4.44898e-05	0.001	3528	tags=81%, list=24%, signal=106%
Reactome	REACTOME_FBXL7_DOWN_REGULATES_AURKA_DURING_MITOTIC_ENTRY_AND_IN_EARLY_MITOSIS	Fbxl7 Down Regulates Aurka During Mitotic Entry And In Early Mitosis	41	0.6931	2.3386	0	4.27787e-05	0.001	3528	tags=83%, list=24%, signal=109%
Reactome	REACTOME_DEGRADATION_OF_CRY_AND_PER_PROTEINS	Degradation Of Cry And Per Proteins	47	0.6594	2.3366	0	4.11943e-05	0.001	3528	tags=74%, list=24%, signal=98%
Reactome	REACTOME_SCF_BETA_TRCP_MEDIATED_DEGRADATION_OF_EMI1	Scf Beta Trcp Mediated Degradation Of Emi1	41	0.6968	2.3346	0	3.9723e-05	0.001	3698	tags=83%, list=25%, signal=110%
Reactome	REACTOME_FCERI_MEDIATED_NF_KB_ACTIVATION	Fceri Mediated Nf Kb Activation	61	0.6267	2.3331	0	3.83533e-05	0.001	3528	tags=69%, list=24%, signal=90%
Reactome	REACTOME_HEDGEHOG_LIGAND_BIOGENESIS	Hedgehog Ligand Biogenesis	46	0.6729	2.3283	0	3.70748e-05	0.001	3472	tags=76%, list=24%, signal=99%
Reactome	REACTOME_METABOLISM_OF_POLYAMINES	Metabolism Of Polyamines	43	0.678	2.3241	0	3.58789e-05	0.001	3472	tags=77%, list=24%, signal=100%
Reactome	REACTOME_SCF_SKP2_MEDIATED_DEGRADATION_OF_P27_P21	Scf Skp2 Mediated Degradation Of P27 P21	47	0.6593	2.3034	0	3.47577e-05	0.001	3528	tags=79%, list=24%, signal=103%
WikiPathways	WP_NUCLEAR_RECEPTORS_METAPATHWAY	Nuclear Receptors Metapathway	198	0.513	2.3024	0	0	0	1680	tags=32%, list=11%, signal=35%
Reactome	REACTOME_DEGRADATION_OF_DVL	Degradation Of Dvl	43	0.6752	2.3006	0	3.37044e-05	0.001	1979	tags=63%, list=13%, signal=72%
Reactome	REACTOME_REGULATION_OF_PTEN_STABILITY_AND_ACTIVITY	Regulation Of Pten Stability And Activity	51	0.63	2.3	0	3.27131e-05	0.001	3472	tags=65%, list=24%, signal=84%
WikiPathways	WP_ANTIVIRAL_AND_ANTIINFLAMMATORY_EFFECTS_OF_NRF2_ON_SARSCOV2_PATHWAY	Antiviral And Antiinflammatory Effects Of Nrf2 On Sarscov2 Pathway	21	0.7934	2.29	0	0	0	1404	tags=57%, list=10%, signal=63%
Reactome	REACTOME_REGULATION_OF_RAS_BY_GAPS	Regulation Of Ras By Gaps	49	0.6533	2.2851	0	3.17784e-05	0.001	3472	tags=71%, list=24%, signal=93%
Reactome	REACTOME_ANTIGEN_PROCESSING_CROSS_PRESENTATION	Antigen Processing Cross Presentation	74	0.5975	2.2812	0	3.08957e-05	0.001	1979	tags=45%, list=13%, signal=51%
Reactome	REACTOME_NFE2L2_REGULATING_ANTI_OXIDANT_DETOXIFICATION_ENZYMES	Nfe2L2 Regulating Anti Oxidant Detoxification Enzymes	17	0.8235	2.2708	0	3.00607e-05	0.001	1244	tags=65%, list=8%, signal=71%
Reactome	REACTOME_AUF1_HNRNP_D0_BINDS_AND_DESTABILIZES_MRNA	Auf1 Hnrnp D0 Binds And Destabilizes Mrna	40	0.6664	2.2636	0	5.55854e-05	0.002	3472	tags=80%, list=24%, signal=104%
WikiPathways	WP_PHOTODYNAMIC_THERAPYINDUCED_NFKB_SURVIVAL_SIGNALING	Photodynamic Therapyinduced Nfkb Survival Signaling	27	0.7222	2.2598	0	0	0	1280	tags=48%, list=9%, signal=53%
Reactome	REACTOME_ANTIGEN_PROCESSING_UB_ATP_INDEPENDENT_PROTEASOMAL_DEGRADATION	Antigen Processing Ub Atp Independent Proteasomal Degradation	16	0.8069	2.236	0	5.41601e-05	0.002	1138	tags=69%, list=8%, signal=74%
Reactome	REACTOME_DOWNSTREAM_TCR_SIGNALING	Downstream Tcr Signaling	61	0.6082	2.2303	0	5.28061e-05	0.002	3564	tags=67%, list=24%, signal=88%
Reactome	REACTOME_REGULATION_OF_RUNX3_EXPRESSION_AND_ACTIVITY	Regulation Of Runx3 Expression And Activity	44	0.6481	2.2276	0	5.15182e-05	0.002	3472	tags=73%, list=24%, signal=95%
Reactome	REACTOME_INTERLEUKIN_1_FAMILY_SIGNALING	Interleukin 1 Family Signaling	110	0.5388	2.2261	0	5.02915e-05	0.002	1979	tags=38%, list=13%, signal=44%
Reactome	REACTOME_CELLULAR_RESPONSE_TO_HYPOXIA	Cellular Response To Hypoxia	57	0.6089	2.2141	0	7.35428e-05	0.003	1979	tags=54%, list=13%, signal=63%
Reactome	REACTOME_METABOLISM_OF_PORPHYRINS	Metabolism Of Porphyrins	18	0.7877	2.2076	0	7.18714e-05	0.003	607	tags=39%, list=4%, signal=41%
Reactome	REACTOME_CLEC7A_DECTIN_1_SIGNALING	Clec7A Dectin 1 Signaling	81	0.5653	2.2075	0	7.02743e-05	0.003	1979	tags=43%, list=13%, signal=50%
Hallmarks	HALLMARK_REACTIVE_OXYGEN_SPECIES_PATHWAY	Reactive Oxygen Species Pathway	41	0.6504	2.2035	0	0	0	1473	tags=41%, list=10%, signal=46%
WikiPathways	WP_TOLLLIKE_RECEPTOR_SIGNALING_RELATED_TO_MYD88	Tolllike Receptor Signaling Related To Myd88	24	0.7245	2.1862	0	0.000130435	0.001	647	tags=29%, list=4%, signal=30%
WikiPathways	WP_FERROPTOSIS	Ferroptosis	53	0.6083	2.1812	0	0.00011413	0.001	1699	tags=38%, list=12%, signal=42%
Hallmarks	HALLMARK_COMPLEMENT	Complement	134	0.5076	2.1684	0	0	0	1522	tags=26%, list=10%, signal=29%
Reactome	REACTOME_ABC_FAMILY_PROTEINS_MEDIATED_TRANSPORT	Abc Family Proteins Mediated Transport	73	0.5635	2.1622	0	0.00016118	0.007	1979	tags=44%, list=13%, signal=50%
Reactome	REACTOME_ORC1_REMOVAL_FROM_CHROMATIN	Orc1 Removal From Chromatin	56	0.6003	2.1528	0	0.000203182	0.009	3539	tags=73%, list=24%, signal=96%
Reactome	REACTOME_CDK_MEDIATED_PHOSPHORYLATION_AND_REMOVAL_OF_CDC6	Cdk Mediated Phosphorylation And Removal Of Cdc6	58	0.5818	2.1474	0	0.000198949	0.009	3472	tags=62%, list=24%, signal=81%
Reactome	REACTOME_G1_S_DNA_DAMAGE_CHECKPOINTS	G1 S Dna Damage Checkpoints	63	0.5743	2.1459	0	0.000194889	0.009	3698	tags=67%, list=25%, signal=89%
WikiPathways	WP_DENGUE2_INTERACTIONS_WITH_COMPLEMENT_AND_COAGULATION_CASCADES	Dengue2 Interactions With Complement And Coagulation Cascades	24	0.712	2.1427	0	0.000722467	0.007	732	tags=38%, list=5%, signal=39%
WikiPathways	WP_OXIDATIVE_STRESS_RESPONSE	Oxidative Stress Response	23	0.6918	2.1369	0	0.00065022	0.007	1244	tags=39%, list=8%, signal=43%
WikiPathways	WP_COMPLEMENT_AND_COAGULATION_CASCADES	Complement And Coagulation Cascades	24	0.712	2.1283	0	0.000591109	0.007	732	tags=38%, list=5%, signal=39%
Reactome	REACTOME_SYNTHESIS_OF_DNA	Synthesis Of Dna	106	0.52	2.1245	0	0.000234117	0.011	3828	tags=63%, list=26%, signal=85%
Reactome	REACTOME_RIBOSOME_QUALITY_CONTROL_RQC_COMPLEX_EXTRACTS_AND_DEGRADES_NASCENT_PEPTIDE	Ribosome Quality Control Rqc Complex Extracts And Degrades Nascent Peptide	98	0.5252	2.1191	0	0.000250439	0.012	3698	tags=53%, list=25%, signal=70%
Reactome	REACTOME_REGULATED_NECROSIS	Regulated Necrosis	46	0.5997	2.1182	0	0.000265778	0.013	2190	tags=39%, list=15%, signal=46%
Hallmarks	HALLMARK_XENOBIOTIC_METABOLISM	Xenobiotic Metabolism	133	0.4976	2.1161	0	0	0	1737	tags=31%, list=12%, signal=35%
Reactome	REACTOME_P53_DEPENDENT_G1_DNA_DAMAGE_RESPONSE	P53 Dependent G1 Dna Damage Response	50	0.5859	2.1115	0	0.000301299	0.015	3472	tags=68%, list=24%, signal=89%
WikiPathways	WP_MIRNA_ROLE_IN_IMMUNE_RESPONSE_IN_SEPSIS	Mirna Role In Immune Response In Sepsis	26	0.6825	2.0955	0	0.00109665	0.014	1376	tags=35%, list=9%, signal=38%
Reactome	REACTOME_DOWNSTREAM_SIGNALING_EVENTS_OF_B_CELL_RECEPTOR_BCR	Downstream Signaling Events Of B Cell Receptor Bcr	65	0.5602	2.0868	0	0.000391727	0.02	3528	tags=63%, list=24%, signal=83%
Reactome	REACTOME_INTERLEUKIN_10_SIGNALING	Interleukin 10 Signaling	20	0.7209	2.0817	0	0.000403515	0.021	1376	tags=65%, list=9%, signal=72%
Reactome	REACTOME_ASYMMETRIC_LOCALIZATION_OF_PCP_PROTEINS	Asymmetric Localization Of Pcp Proteins	46	0.5936	2.0729	0	0.0005085	0.027	1979	tags=54%, list=13%, signal=63%
Reactome	REACTOME_FORMATION_OF_PARAXIAL_MESODERM	Formation Of Paraxial Mesoderm	48	0.5785	2.0689	0	0.000536132	0.029	1979	tags=52%, list=13%, signal=60%
Reactome	REACTOME_SWITCHING_OF_ORIGINS_TO_A_POST_REPLICATIVE_STATE	Switching Of Origins To A Post Replicative State	77	0.5358	2.0655	0	0.000545644	0.03	3539	tags=61%, list=24%, signal=80%
Reactome	REACTOME_BIOLOGICAL_OXIDATIONS	Biological Oxidations	99	0.5118	2.0527	0	0.000713361	0.04	1706	tags=32%, list=12%, signal=36%
Reactome	REACTOME_PHASE_I_FUNCTIONALIZATION_OF_COMPOUNDS	Phase I Functionalization Of Compounds	49	0.5772	2.0411	0	0.000858095	0.048	1260	tags=33%, list=9%, signal=36%
WikiPathways	WP_LUNG_FIBROSIS	Lung Fibrosis	34	0.6227	2.0346	0	0.00254429	0.035	894	tags=38%, list=6%, signal=41%
WikiPathways	WP_OVERVIEW_OF_PROINFLAMMATORY_AND_PROFIBROTIC_MEDIATORS	Overview Of Proinflammatory And Profibrotic Mediators	27	0.6524	2.0272	0	0.00256134	0.038	1568	tags=59%, list=11%, signal=66%
Reactome	REACTOME_REGULATION_OF_RUNX2_EXPRESSION_AND_ACTIVITY	Regulation Of Runx2 Expression And Activity	55	0.5522	2.0146	0	0.00125738	0.069	1979	tags=47%, list=13%, signal=54%
Reactome	REACTOME_THE_ROLE_OF_GTSE1_IN_G2_M_PROGRESSION_AFTER_G2_CHECKPOINT	The Role Of Gtse1 In G2 M Progression After G2 Checkpoint	55	0.5562	2.0136	0	0.0012541	0.07	3472	tags=73%, list=24%, signal=95%
WikiPathways	WP_EBSTEINBARR_VIRUS_LMP1_SIGNALING	Ebsteinbarr Virus Lmp1 Signaling	20	0.6984	2.0104	0.00204082	0.00314654	0.049	419	tags=30%, list=3%, signal=31%
WikiPathways	WP_METAPATHWAY_BIOTRANSFORMATION_PHASE_I_AND_II	Metapathway Biotransformation Phase I And Ii	79	0.5268	2.0085	0	0.00306637	0.051	1233	tags=28%, list=8%, signal=30%
Reactome	REACTOME_REGULATION_OF_CDH1_FUNCTION	Regulation Of Cdh1 Function	56	0.5585	2.006	0	0.00138369	0.079	1979	tags=46%, list=13%, signal=53%
WikiPathways	WP_PROSTAGLANDIN_SYNTHESIS_AND_REGULATION	Prostaglandin Synthesis And Regulation	23	0.6673	2.0057	0	0.00311683	0.055	1392	tags=52%, list=9%, signal=58%
WikiPathways	WP_OXIDATION_BY_CYTOCHROME_P450	Oxidation By Cytochrome P450	23	0.683	2.0056	0	0.00294367	0.055	1260	tags=48%, list=9%, signal=52%
Reactome	REACTOME_ARACHIDONATE_METABOLISM	Arachidonate Metabolism	27	0.6494	1.9956	0.00201613	0.00167326	0.097	1322	tags=41%, list=9%, signal=45%
WikiPathways	WP_SELENIUM_MICRONUTRIENT_NETWORK	Selenium Micronutrient Network	52	0.5532	1.9851	0	0.00383047	0.076	1348	tags=33%, list=9%, signal=36%
Reactome	REACTOME_RIBOSOME_ASSOCIATED_QUALITY_CONTROL	Ribosome Associated Quality Control	135	0.4692	1.9781	0	0.00206873	0.122	3741	tags=46%, list=25%, signal=61%
WikiPathways	WP_NRF2ARE_REGULATION	Nrf2Are Regulation	21	0.6729	1.9748	0	0.00409992	0.086	1946	tags=43%, list=13%, signal=49%
Reactome	REACTOME_HOST_INTERACTIONS_OF_HIV_FACTORS	Host Interactions Of Hiv Factors	108	0.4813	1.9695	0	0.00243499	0.143	3513	tags=46%, list=24%, signal=60%
Reactome	REACTOME_ZBP1_DAI_MEDIATED_INDUCTION_OF_TYPE_I_IFNS	Zbp1 Dai Mediated Induction Of Type I Ifns	18	0.6934	1.9671	0	0.00244542	0.146	508	tags=33%, list=3%, signal=34%
Reactome	REACTOME_CYTOCHROME_P450_ARRANGED_BY_SUBSTRATE_TYPE	Cytochrome P450 Arranged By Substrate Type	25	0.6458	1.9627	0	0.00251902	0.153	1582	tags=44%, list=11%, signal=49%
Reactome	REACTOME_HEDGEHOG_ON_STATE	Hedgehog On State	64	0.5329	1.9608	0	0.00266583	0.162	3472	tags=58%, list=24%, signal=75%
Hallmarks	HALLMARK_HYPOXIA	Hypoxia	159	0.4538	1.9599	0	0	0	1653	tags=28%, list=11%, signal=31%
WikiPathways	WP_TNFRELATED_WEAK_INDUCER_OF_APOPTOSIS_TWEAK_SIGNALING	Tnfrelated Weak Inducer Of Apoptosis Tweak Signaling	39	0.5777	1.9549	0.0019305	0.00513011	0.111	1522	tags=33%, list=10%, signal=37%
Reactome	REACTOME_ACTIVATION_OF_APC_C_AND_APC_C_CDC20_MEDIATED_DEGRADATION_OF_MITOTIC_PROTEINS	Activation Of Apc C And Apc C Cdc20 Mediated Degradation Of Mitotic Proteins	62	0.5214	1.9333	0.00176678	0.00382681	0.227	3472	tags=61%, list=24%, signal=80%
Reactome	REACTOME_C_TYPE_LECTIN_RECEPTORS_CLRS	C Type Lectin Receptors Clrs	97	0.4822	1.9328	0	0.00383125	0.231	1811	tags=36%, list=12%, signal=41%
Reactome	REACTOME_APC_C_CDH1_MEDIATED_DEGRADATION_OF_CDC20_AND_OTHER_APC_C_CDH1_TARGETED_PROTEINS_IN_LATE_MITOSIS_EARLY_G1	Apc C Cdh1 Mediated Degradation Of Cdc20 And Other Apc C Cdh1 Targeted Proteins In Late Mitosis Early G1	60	0.5261	1.9311	0	0.00392553	0.24	1979	tags=43%, list=13%, signal=50%
Reactome	REACTOME_DISEASES_OF_IMMUNE_SYSTEM	Diseases Of Immune System	21	0.6411	1.9194	0	0.00428702	0.262	647	tags=33%, list=4%, signal=35%
Reactome	REACTOME_CYCLIN_A_CDK2_ASSOCIATED_EVENTS_AT_S_PHASE_ENTRY	Cyclin A Cdk2 Associated Events At S Phase Entry	70	0.5026	1.9177	0	0.00431547	0.268	2107	tags=44%, list=14%, signal=51%
Reactome	REACTOME_REGULATION_OF_MRNA_STABILITY_BY_PROTEINS_THAT_BIND_AU_RICH_ELEMENTS	Regulation Of Mrna Stability By Proteins That Bind Au Rich Elements	70	0.5009	1.9153	0	0.00438369	0.274	3811	tags=57%, list=26%, signal=77%
WikiPathways	WP_CYTOKINECYTOKINE_RECEPTOR_INTERACTION	Cytokinecytokine Receptor Interaction	88	0.4853	1.9126	0	0.00901314	0.188	1376	tags=32%, list=9%, signal=35%
Reactome	REACTOME_METABOLIC_DISORDERS_OF_BIOLOGICAL_OXIDATION_ENZYMES	Metabolic Disorders Of Biological Oxidation Enzymes	19	0.682	1.9124	0	0.00439561	0.278	1322	tags=47%, list=9%, signal=52%
Reactome	REACTOME_INTERLEUKIN_4_AND_INTERLEUKIN_13_SIGNALING	Interleukin 4 And Interleukin 13 Signaling	68	0.5021	1.9049	0	0.00470827	0.295	1376	tags=31%, list=9%, signal=34%
Hallmarks	HALLMARK_INFLAMMATORY_RESPONSE	Inflammatory Response	106	0.4631	1.9032	0.00189394	0.000829285	0.004	2071	tags=39%, list=14%, signal=45%
Reactome	REACTOME_SELECTIVE_AUTOPHAGY	Selective Autophagy	75	0.4935	1.9014	0.00183824	0.0048888	0.305	2472	tags=36%, list=17%, signal=43%
Reactome	REACTOME_COMPLEX_IV_ASSEMBLY	Complex Iv Assembly	39	0.5557	1.9008	0	0.0048401	0.306	4136	tags=62%, list=28%, signal=85%
WikiPathways	WP_ARYL_HYDROCARBON_RECEPTOR_PATHWAY_WP2873	Aryl Hydrocarbon Receptor Pathway Wp2873	27	0.6035	1.8972	0.00197239	0.0107583	0.232	1916	tags=37%, list=13%, signal=42%
Reactome	REACTOME_PYROPTOSIS	Pyroptosis	19	0.6606	1.8956	0	0.00522796	0.328	2772	tags=58%, list=19%, signal=71%
WikiPathways	WP_GLUCOCORTICOID_RECEPTOR_PATHWAY	Glucocorticoid Receptor Pathway	52	0.5121	1.8876	0.00190476	0.0116463	0.256	1280	tags=29%, list=9%, signal=31%
Reactome	REACTOME_BILE_ACID_AND_BILE_SALT_METABOLISM	Bile Acid And Bile Salt Metabolism	22	0.6424	1.8834	0.00197628	0.00608186	0.375	698	tags=23%, list=5%, signal=24%
WikiPathways	WP_TOLLLIKE_RECEPTOR_SIGNALING	Tolllike Receptor Signaling	59	0.4979	1.8735	0	0.0133255	0.295	1173	tags=24%, list=8%, signal=26%
Reactome	REACTOME_DEGRADATION_OF_BETA_CATENIN_BY_THE_DESTRUCTION_COMPLEX	Degradation Of Beta Catenin By The Destruction Complex	69	0.5041	1.8692	0.00179533	0.00712307	0.429	1979	tags=41%, list=13%, signal=47%
WikiPathways	WP_MITOCHONDRIAL_IMMUNE_RESPONSE_TO_SARSCOV2	Mitochondrial Immune Response To Sarscov2	22	0.6314	1.8646	0	0.0141878	0.324	1542	tags=32%, list=10%, signal=35%
Reactome	REACTOME_APC_C_MEDIATED_DEGRADATION_OF_CELL_CYCLE_PROTEINS	Apc C Mediated Degradation Of Cell Cycle Proteins	73	0.4839	1.8575	0	0.00820912	0.484	3528	tags=56%, list=24%, signal=73%
Reactome	REACTOME_TNFR1_INDUCED_PROAPOPTOTIC_SIGNALING	Tnfr1 Induced Proapoptotic Signaling	24	0.624	1.8553	0.00192678	0.00831407	0.491	1388	tags=38%, list=9%, signal=41%
Reactome	REACTOME_UCH_PROTEINASES	Uch Proteinases	81	0.4752	1.8549	0	0.00825401	0.492	3472	tags=47%, list=24%, signal=61%
Reactome	REACTOME_HDR_THROUGH_HOMOLOGOUS_RECOMBINATION_HRR	Hdr Through Homologous Recombination Hrr	64	0.4935	1.8539	0	0.00824443	0.497	3655	tags=48%, list=25%, signal=64%
Reactome	REACTOME_TRANSLESION_SYNTHESIS_BY_POLH	Translesion Synthesis By Polh	19	0.6519	1.8522	0	0.0083089	0.506	3676	tags=63%, list=25%, signal=84%
Reactome	REACTOME_SIGNALING_BY_THE_B_CELL_RECEPTOR_BCR	Signaling By The B Cell Receptor Bcr	86	0.4689	1.8495	0	0.00847656	0.521	1811	tags=35%, list=12%, signal=40%
WikiPathways	WP_PHOTODYNAMIC_THERAPYINDUCED_HIF1_SURVIVAL_SIGNALING	Photodynamic Therapyinduced Hif1 Survival Signaling	33	0.5722	1.8462	0	0.0165371	0.38	1504	tags=33%, list=10%, signal=37%
Reactome	REACTOME_S_PHASE	S Phase	145	0.4267	1.8462	0	0.00873497	0.537	3828	tags=53%, list=26%, signal=71%
Reactome	REACTOME_HSP90_CHAPERONE_CYCLE_FOR_STEROID_HORMONE_RECEPTORS_SHR_IN_THE_PRESENCE_OF_LIGAND	Hsp90 Chaperone Cycle For Steroid Hormone Receptors Shr In The Presence Of Ligand	44	0.5372	1.8412	0	0.00911467	0.556	2669	tags=45%, list=18%, signal=55%
Reactome	REACTOME_SIGNALING_BY_INTERLEUKINS	Signaling By Interleukins	312	0.3904	1.8398	0	0.00916508	0.564	1546	tags=24%, list=10%, signal=27%
Reactome	REACTOME_HEDGEHOG_OFF_STATE	Hedgehog Off State	88	0.4615	1.8372	0	0.00930399	0.574	3698	tags=52%, list=25%, signal=69%
Hallmarks	HALLMARK_KRAS_SIGNALING_UP	Kras Signaling Up	122	0.4415	1.8341	0	0.00255709	0.014	1320	tags=25%, list=9%, signal=27%
Reactome	REACTOME_PCP_CE_PATHWAY	Pcp Ce Pathway	68	0.4823	1.8311	0.00182149	0.00974629	0.596	1979	tags=38%, list=13%, signal=44%
Reactome	REACTOME_SIGNALING_BY_NOTCH4	Signaling By Notch4	67	0.4863	1.8305	0.00187617	0.00968637	0.598	1979	tags=42%, list=13%, signal=48%
Reactome	REACTOME_IKK_COMPLEX_RECRUITMENT_MEDIATED_BY_RIP1	Ikk Complex Recruitment Mediated By Rip1	19	0.6186	1.8149	0	0.011266	0.65	1811	tags=37%, list=12%, signal=42%
Reactome	REACTOME_MAPK6_MAPK4_SIGNALING	Mapk6 Mapk4 Signaling	73	0.4716	1.8131	0	0.0114356	0.658	2038	tags=41%, list=14%, signal=47%
Reactome	REACTOME_TICAM1_RIP1_MEDIATED_IKK_COMPLEX_RECRUITMENT	Ticam1 Rip1 Mediated Ikk Complex Recruitment	17	0.6487	1.8057	0.00578035	0.0122518	0.674	1811	tags=35%, list=12%, signal=40%
WikiPathways	WP_LDL_INFLUENCE_ON_CD14_AND_TLR4	Ldl Influence On Cd14 And Tlr4	18	0.6365	1.8053	0.00575816	0.0251735	0.516	1376	tags=39%, list=9%, signal=43%
Reactome	REACTOME_TCR_SIGNALING	Tcr Signaling	77	0.4629	1.7999	0	0.0129108	0.696	1979	tags=40%, list=13%, signal=46%
WikiPathways	WP_TNFALPHA_SIGNALING	Tnfalpha Signaling	82	0.4571	1.7981	0	0.0259994	0.539	1522	tags=26%, list=10%, signal=28%
WikiPathways	WP_IL18_SIGNALING	Il18 Signaling	194	0.4044	1.7971	0	0.0253538	0.543	1480	tags=20%, list=10%, signal=21%
WikiPathways	WP_TLR4_SIGNALING_AND_TOLERANCE	Tlr4 Signaling And Tolerance	21	0.6161	1.7848	0.00992064	0.0279408	0.584	647	tags=24%, list=4%, signal=25%
WikiPathways	WP_NFKB_SIGNALING_AND_ARTD_FAMILY_MEMBERS	Nfkb Signaling And Artd Family Members	26	0.5887	1.7785	0.00199203	0.0291971	0.615	1409	tags=38%, list=10%, signal=42%
WikiPathways	WP_IL1_AND_MEGAKARYOCYTES_IN_OBESITY	Il1 And Megakaryocytes In Obesity	18	0.6238	1.7776	0.00401606	0.0286565	0.62	894	tags=28%, list=6%, signal=30%
WikiPathways	WP_INTRAFLAGELLAR_TRANSPORT_PROTEINS_BINDING_TO_DYNEIN	Intraflagellar Transport Proteins Binding To Dynein	25	0.5716	1.777	0.00568182	0.0278945	0.62	2273	tags=44%, list=15%, signal=52%
Reactome	REACTOME_RIPK1_MEDIATED_REGULATED_NECROSIS	Ripk1 Mediated Regulated Necrosis	27	0.5735	1.7762	0	0.0167848	0.787	2190	tags=33%, list=15%, signal=39%
Hallmarks	HALLMARK_GLYCOLYSIS	Glycolysis	168	0.4093	1.7729	0	0.0051762	0.031	1929	tags=28%, list=13%, signal=32%
Reactome	REACTOME_DNA_REPLICATION_PRE_INITIATION	Dna Replication Pre Initiation	134	0.4184	1.7728	0	0.0172095	0.802	3698	tags=43%, list=25%, signal=57%
WikiPathways	WP_PARKINUBIQUITIN_PROTEASOMAL_SYSTEM_PATHWAY	Parkinubiquitin Proteasomal System Pathway	57	0.4784	1.7687	0.00372439	0.0297405	0.658	3553	tags=56%, list=24%, signal=74%
WikiPathways	WP_ALLOGRAFT_REJECTION	Allograft Rejection	31	0.5514	1.7638	0.00381679	0.030271	0.68	1737	tags=39%, list=12%, signal=44%
Reactome	REACTOME_PROGRAMMED_CELL_DEATH	Programmed Cell Death	168	0.405	1.7627	0	0.0187852	0.829	3028	tags=39%, list=21%, signal=48%
Reactome	REACTOME_INTERCONVERSION_OF_NUCLEOTIDE_DI_AND_TRIPHOSPHATES	Interconversion Of Nucleotide Di And Triphosphates	24	0.5978	1.7604	0.00208333	0.0190883	0.837	375	tags=21%, list=3%, signal=21%
WikiPathways	WP_BURN_WOUND_HEALING	Burn Wound Healing	74	0.4552	1.76	0	0.0306547	0.692	1459	tags=28%, list=10%, signal=31%
Reactome	REACTOME_DRUG_ADME	Drug Adme	38	0.5208	1.7517	0.00386847	0.0207873	0.871	329	tags=13%, list=2%, signal=13%
WikiPathways	WP_NUCLEOTIDEBINDING_OLIGOMERIZATION_DOMAIN_NOD_PATHWAY	Nucleotidebinding Oligomerization Domain Nod Pathway	26	0.5573	1.7474	0.00963391	0.0339475	0.731	2170	tags=38%, list=15%, signal=45%
WikiPathways	WP_MITOCHONDRIAL_COMPLEX_IV_ASSEMBLY	Mitochondrial Complex Iv Assembly	31	0.5539	1.7457	0.00375235	0.0335412	0.735	4136	tags=61%, list=28%, signal=85%
Reactome	REACTOME_DEVELOPMENTAL_CELL_LINEAGES_OF_THE_EXOCRINE_PANCREAS	Developmental Cell Lineages Of The Exocrine Pancreas	30	0.54	1.7385	0.00198807	0.0234278	0.901	1406	tags=37%, list=10%, signal=40%
WikiPathways	WP_OMEGA6FATTY_ACIDS_IN_SENESCENCE	Omega6Fatty Acids In Senescence	31	0.5475	1.7361	0.00787402	0.0358527	0.769	1322	tags=29%, list=9%, signal=32%
WikiPathways	WP_PREGNANE_X_RECEPTOR_PATHWAY	Pregnane X Receptor Pathway	16	0.6382	1.7358	0.014	0.0351584	0.77	63	tags=19%, list=0%, signal=19%
WikiPathways	WP_UTERINE_NATURAL_KILLER_CELLS_AND_PROGESTERONE_ESTROGEN_AND_CHORIONIC_GONADOTROPIN	Uterine Natural Killer Cells And Progesterone Estrogen And Chorionic Gonadotropin	22	0.595	1.7349	0.00396825	0.0346359	0.772	1407	tags=41%, list=10%, signal=45%
Reactome	REACTOME_PEPTIDE_LIGAND_BINDING_RECEPTORS	Peptide Ligand Binding Receptors	38	0.5124	1.7287	0.00723327	0.0252809	0.912	2368	tags=45%, list=16%, signal=53%
Reactome	REACTOME_COOPERATION_OF_PREFOLDIN_AND_TRIC_CCT_IN_ACTIN_AND_TUBULIN_FOLDING	Cooperation Of Prefoldin And Tric Cct In Actin And Tubulin Folding	25	0.5654	1.7144	0.00578035	0.0286891	0.94	3575	tags=56%, list=24%, signal=74%
Reactome	REACTOME_DETOXIFICATION_OF_REACTIVE_OXYGEN_SPECIES	Detoxification Of Reactive Oxygen Species	25	0.5601	1.7105	0.0117188	0.0293806	0.949	376	tags=20%, list=3%, signal=20%
WikiPathways	WP_OSTEOARTHRITIC_CHONDROCYTE_HYPERTROPHY	Osteoarthritic Chondrocyte Hypertrophy	38	0.5108	1.7105	0.00727273	0.0429378	0.846	1035	tags=29%, list=7%, signal=31%
Reactome	REACTOME_METABOLISM_OF_FAT_SOLUBLE_VITAMINS	Metabolism Of Fat Soluble Vitamins	30	0.5313	1.71	0.0115163	0.0292727	0.951	968	tags=27%, list=7%, signal=28%
Reactome	REACTOME_GASTRULATION	Gastrulation	77	0.4407	1.7084	0.00371058	0.0295979	0.955	1778	tags=36%, list=12%, signal=41%
Reactome	REACTOME_HIV_INFECTION	Hiv Infection	199	0.3836	1.7067	0	0.0298277	0.96	3975	tags=42%, list=27%, signal=57%
Reactome	REACTOME_REGULATION_OF_EXPRESSION_OF_SLITS_AND_ROBOS	Regulation Of Expression Of Slits And Robos	144	0.3971	1.7053	0	0.0299409	0.961	3576	tags=40%, list=24%, signal=52%
Reactome	REACTOME_DNA_REPLICATION	Dna Replication	168	0.3913	1.7022	0	0.030587	0.964	3828	tags=44%, list=26%, signal=59%
WikiPathways	WP_STING_PATHWAY_IN_KAWASAKILIKE_DISEASE_AND_COVID19	Sting Pathway In Kawasakilike Disease And Covid19	18	0.6087	1.6999	0.00952381	0.045884	0.876	964	tags=33%, list=7%, signal=36%
Reactome	REACTOME_G2_M_CHECKPOINTS	G2 M Checkpoints	139	0.4028	1.6956	0	0.0322443	0.974	3698	tags=47%, list=25%, signal=62%
Reactome	REACTOME_PURINERGIC_SIGNALING_IN_LEISHMANIASIS_INFECTION	Purinergic Signaling In Leishmaniasis Infection	18	0.6036	1.694	0.0159046	0.0322674	0.974	450	tags=28%, list=3%, signal=29%
Reactome	REACTOME_GLUTATHIONE_CONJUGATION	Glutathione Conjugation	23	0.5679	1.6907	0.01341	0.0327321	0.977	2451	tags=48%, list=17%, signal=57%
WikiPathways	WP_CATABOLISM_OF_SKELETAL_MUSCLE_IN_CACHEXIA	Catabolism Of Skeletal Muscle In Cachexia	36	0.5117	1.6893	0.00576923	0.0496506	0.909	952	tags=31%, list=6%, signal=33%
Reactome	REACTOME_SIGNALING_BY_HEDGEHOG	Signaling By Hedgehog	116	0.4063	1.6871	0	0.0334578	0.979	3528	tags=44%, list=24%, signal=57%
Hallmarks	HALLMARK_COAGULATION	Coagulation	79	0.4371	1.6835	0.00375235	0.00885333	0.06	732	tags=18%, list=5%, signal=19%
WikiPathways	WP_IL1_SIGNALING	Il1 Signaling	52	0.4676	1.6744	0	0.0552468	0.936	894	tags=19%, list=6%, signal=20%
Reactome	REACTOME_COMPLEMENT_CASCADE	Complement Cascade	15	0.6107	1.6736	0.0103306	0.0373694	0.991	513	tags=27%, list=3%, signal=28%
Reactome	REACTOME_MAP3K8_TPL2_DEPENDENT_MAPK1_3_ACTIVATION	Map3K8 Tpl2 Dependent Mapk1 3 Activation	16	0.6135	1.6725	0.0196078	0.0374955	0.992	3528	tags=50%, list=24%, signal=66%
WikiPathways	WP_APOPTOSIS_MODULATION_AND_SIGNALING	Apoptosis Modulation And Signaling	72	0.4341	1.6709	0.00371058	0.0555541	0.943	2190	tags=32%, list=15%, signal=37%
Reactome	REACTOME_TNF_SIGNALING	Tnf Signaling	54	0.4619	1.6708	0.00553506	0.0377145	0.992	1811	tags=28%, list=12%, signal=32%
Reactome	REACTOME_MITOTIC_G1_PHASE_AND_G1_S_TRANSITION	Mitotic G1 Phase And G1 S Transition	130	0.3947	1.6683	0	0.0381729	0.993	2107	tags=35%, list=14%, signal=41%
Reactome	REACTOME_RESPONSE_TO_ELEVATED_PLATELET_CYTOSOLIC_CA2	Response To Elevated Platelet Cytosolic Ca2	88	0.4229	1.6664	0.00182482	0.0385045	0.993	1384	tags=19%, list=9%, signal=21%
Reactome	REACTOME_RUNX1_REGULATES_TRANSCRIPTION_OF_GENES_INVOLVED_IN_DIFFERENTIATION_OF_HSCS	Runx1 Regulates Transcription Of Genes Involved In Differentiation Of Hscs	94	0.4142	1.6562	0.00724638	0.0415955	0.995	2197	tags=31%, list=15%, signal=36%
WikiPathways	WP_SIGNAL_TRANSDUCTION_THROUGH_IL1R	Signal Transduction Through Il1R	26	0.5244	1.6518	0.012844	0.0635683	0.965	554	tags=23%, list=4%, signal=24%
Reactome	REACTOME_TRANSCRIPTIONAL_REGULATION_BY_RUNX3	Transcriptional Regulation By Runx3	81	0.4238	1.6505	0.00191571	0.0436619	0.996	1979	tags=35%, list=13%, signal=40%
Reactome	REACTOME_AGGREPHAGY	Aggrephagy	32	0.5157	1.6501	0.012987	0.0435286	0.996	2472	tags=41%, list=17%, signal=49%
Reactome	REACTOME_SEPARATION_OF_SISTER_CHROMATIDS	Separation Of Sister Chromatids	164	0.3784	1.6465	0	0.044359	0.997	3566	tags=44%, list=24%, signal=57%
Reactome	REACTOME_COPI_MEDIATED_ANTEROGRADE_TRANSPORT	Copi Mediated Anterograde Transport	85	0.41	1.6463	0.00183824	0.0441313	0.997	2245	tags=25%, list=15%, signal=29%
Reactome	REACTOME_INSERTION_OF_TAIL_ANCHORED_PROTEINS_INTO_THE_ENDOPLASMIC_RETICULUM_MEMBRANE	Insertion Of Tail Anchored Proteins Into The Endoplasmic Reticulum Membrane	20	0.5664	1.6448	0.0260708	0.0443415	0.998	4128	tags=60%, list=28%, signal=83%
Reactome	REACTOME_INTRAFLAGELLAR_TRANSPORT	Intraflagellar Transport	43	0.4788	1.6439	0.0131827	0.0443813	0.998	2517	tags=35%, list=17%, signal=42%
Reactome	REACTOME_DISORDERS_OF_TRANSMEMBRANE_TRANSPORTERS	Disorders Of Transmembrane Transporters	114	0.3953	1.6426	0.00344234	0.0446508	0.998	2166	tags=35%, list=15%, signal=41%
Reactome	REACTOME_MITOPHAGY	Mitophagy	37	0.4965	1.6411	0.0123203	0.0449519	0.998	2336	tags=32%, list=16%, signal=38%
Reactome	REACTOME_UB_SPECIFIC_PROCESSING_PROTEASES	Ub Specific Processing Proteases	166	0.375	1.6355	0	0.0465352	0.998	3472	tags=34%, list=24%, signal=44%
Reactome	REACTOME_RECOGNITION_OF_DNA_DAMAGE_BY_PCNA_CONTAINING_REPLICATION_COMPLEX	Recognition Of Dna Damage By Pcna Containing Replication Complex	30	0.5126	1.6324	0.0198807	0.0473667	0.998	3786	tags=57%, list=26%, signal=76%
Reactome	REACTOME_INTERLEUKIN_6_FAMILY_SIGNALING	Interleukin 6 Family Signaling	16	0.6078	1.6288	0.0217391	0.0483535	0.998	394	tags=25%, list=3%, signal=26%
WikiPathways	WP_MIRNA_REGULATION_OF_P53_PATHWAY_IN_PROSTATE_CANCER	Mirna Regulation Of P53 Pathway In Prostate Cancer	21	0.55	1.6254	0.0158103	0.0779677	0.986	1459	tags=24%, list=10%, signal=26%
Reactome	REACTOME_PINK1_PRKN_MEDIATED_MITOPHAGY	Pink1 Prkn Mediated Mitophagy	30	0.5093	1.6248	0.0137525	0.0497085	0.999	2336	tags=33%, list=16%, signal=40%
Hallmarks	HALLMARK_UV_RESPONSE_UP	Uv Response Up	128	0.3912	1.6234	0.003663	0.0155696	0.116	1706	tags=23%, list=12%, signal=25%
Reactome	REACTOME_HOMOLOGOUS_DNA_PAIRING_AND_STRAND_EXCHANGE	Homologous Dna Pairing And Strand Exchange	41	0.4786	1.6161	0.0142857	0.0529644	0.999	3655	tags=46%, list=25%, signal=61%
Reactome	REACTOME_DNA_DAMAGE_BYPASS	Dna Damage Bypass	45	0.464	1.6158	0.00990099	0.0527056	0.999	3786	tags=53%, list=26%, signal=72%
Reactome	REACTOME_NUCLEOTIDE_BINDING_DOMAIN_LEUCINE_RICH_REPEAT_CONTAINING_RECEPTOR_NLR_SIGNALING_PATHWAYS	Nucleotide Binding Domain Leucine Rich Repeat Containing Receptor Nlr Signaling Pathways	47	0.456	1.6138	0.00770713	0.0531652	0.999	522	tags=17%, list=4%, signal=18%
WikiPathways	WP_NUCLEAR_RECEPTORS_IN_LIPID_METABOLISM_AND_TOXICITY	Nuclear Receptors In Lipid Metabolism And Toxicity	16	0.6005	1.6136	0.0255403	0.0840396	0.986	643	tags=31%, list=4%, signal=33%
Reactome	REACTOME_BASIGIN_INTERACTIONS	Basigin Interactions	21	0.5572	1.6125	0.0205339	0.0533149	0.999	1199	tags=24%, list=8%, signal=26%
WikiPathways	WP_PROSTAGLANDIN_SIGNALING	Prostaglandin Signaling	15	0.6009	1.6067	0.0305499	0.0869814	0.99	1582	tags=53%, list=11%, signal=60%
WikiPathways	WP_T_CELL_MODULATION_AND_DESMOPLASIA_IN_PANCREATIC_CANCER	T Cell Modulation And Desmoplasia In Pancreatic Cancer	28	0.5133	1.6064	0.0230769	0.0854737	0.991	1812	tags=43%, list=12%, signal=49%
Reactome	REACTOME_REGULATION_OF_PD_L1_CD274_EXPRESSION	Regulation Of Pd L1 Cd274 Expression	170	0.3685	1.6054	0	0.0561237	0.999	2350	tags=28%, list=16%, signal=33%
Reactome	REACTOME_GENE_AND_PROTEIN_EXPRESSION_BY_JAK_STAT_SIGNALING_AFTER_INTERLEUKIN_12_STIMULATION	Gene And Protein Expression By Jak Stat Signaling After Interleukin 12 Stimulation	32	0.5013	1.604	0.00185874	0.0563744	0.999	1652	tags=31%, list=11%, signal=35%
Reactome	REACTOME_NEDDYLATION	Neddylation	206	0.3586	1.6011	0	0.0575227	0.999	3741	tags=43%, list=25%, signal=57%
Reactome	REACTOME_SYNTHESIS_OF_BILE_ACIDS_AND_BILE_SALTS	Synthesis Of Bile Acids And Bile Salts	19	0.5709	1.6	0.0268714	0.0575555	0.999	698	tags=16%, list=5%, signal=17%
WikiPathways	WP_7Q1123_DISTAL_COPY_NUMBER_VARIATION	7Q1123 Distal Copy Number Variation	17	0.5744	1.5991	0.0207039	0.0888113	0.992	3031	tags=59%, list=21%, signal=74%
Hallmarks	HALLMARK_APOPTOSIS	Apoptosis	131	0.3818	1.595	0.00513699	0.0195061	0.155	2397	tags=31%, list=16%, signal=36%
Reactome	REACTOME_CIRCADIAN_CLOCK	Circadian Clock	98	0.4008	1.5937	0	0.0602228	1	2118	tags=33%, list=14%, signal=38%
Reactome	REACTOME_TRANSCRIPTIONAL_REGULATION_BY_RUNX2	Transcriptional Regulation By Runx2	92	0.4032	1.5933	0.00536673	0.0600035	1	2097	tags=34%, list=14%, signal=39%
Hallmarks	HALLMARK_IL6_JAK_STAT3_SIGNALING	Il6 Jak Stat3 Signaling	51	0.4452	1.5917	0.0152381	0.0186228	0.162	1855	tags=29%, list=13%, signal=34%
Reactome	REACTOME_PHASE_II_CONJUGATION_OF_COMPOUNDS	Phase Ii Conjugation Of Compounds	49	0.4425	1.591	0.0110701	0.0606192	1	1706	tags=31%, list=12%, signal=34%
Reactome	REACTOME_TRANSLATION	Translation	336	0.3344	1.5886	0	0.0614857	1	3775	tags=35%, list=26%, signal=47%
Reactome	REACTOME_IRON_UPTAKE_AND_TRANSPORT	Iron Uptake And Transport	48	0.4443	1.5865	0.00594059	0.0619388	1	1811	tags=29%, list=12%, signal=33%
Reactome	REACTOME_AUTOPHAGY	Autophagy	138	0.3749	1.5816	0	0.0641277	1	4348	tags=45%, list=29%, signal=63%
Reactome	REACTOME_FC_EPSILON_RECEPTOR_FCERI_SIGNALING	Fc Epsilon Receptor Fceri Signaling	107	0.3849	1.581	0	0.0639956	1	1811	tags=29%, list=12%, signal=33%
Reactome	REACTOME_TERMINATION_OF_TRANSLESION_DNA_SYNTHESIS	Termination Of Translesion Dna Synthesis	29	0.5056	1.5806	0.0317757	0.0637726	1	3616	tags=59%, list=25%, signal=77%
Reactome	REACTOME_DDX58_IFIH1_MEDIATED_INDUCTION_OF_INTERFERON_ALPHA_BETA	Ddx58 Ifih1 Mediated Induction Of Interferon Alpha Beta	59	0.4334	1.5773	0.00996016	0.0648976	1	1916	tags=29%, list=13%, signal=33%
Reactome	REACTOME_CO_INHIBITION_BY_PD_1	Co Inhibition By Pd 1	172	0.3622	1.5746	0.00172712	0.0658976	1	2350	tags=27%, list=16%, signal=32%
WikiPathways	WP_NETWORK_MAP_OF_SARSCOV2_SIGNALING	Network Map Of Sarscov2 Signaling	158	0.3606	1.5706	0.00177936	0.107906	0.998	1863	tags=22%, list=13%, signal=25%
Reactome	REACTOME_CASPASE_ACTIVATION_VIA_EXTRINSIC_APOPTOTIC_SIGNALLING_PATHWAY	Caspase Activation Via Extrinsic Apoptotic Signalling Pathway	18	0.5492	1.5697	0.0469667	0.0681117	1	2190	tags=44%, list=15%, signal=52%
Reactome	REACTOME_COPI_INDEPENDENT_GOLGI_TO_ER_RETROGRADE_TRAFFIC	Copi Independent Golgi To Er Retrograde Traffic	43	0.4522	1.5695	0.023301	0.067832	1	3476	tags=47%, list=24%, signal=61%
Reactome	REACTOME_MITOTIC_METAPHASE_AND_ANAPHASE	Mitotic Metaphase And Anaphase	208	0.3492	1.5672	0	0.0686018	1	3811	tags=43%, list=26%, signal=58%
Reactome	REACTOME_TRANSLESION_SYNTHESIS_BY_Y_FAMILY_DNA_POLYMERASES_BYPASSES_LESIONS_ON_DNA_TEMPLATE	Translesion Synthesis By Y Family Dna Polymerases Bypasses Lesions On Dna Template	36	0.4711	1.5648	0.0271318	0.0693905	1	3676	tags=56%, list=25%, signal=74%
Hallmarks	HALLMARK_MTORC1_SIGNALING	Mtorc1 Signaling	193	0.3458	1.5645	0.00540541	0.0215498	0.204	1653	tags=22%, list=11%, signal=25%
Reactome	REACTOME_FANCONI_ANEMIA_PATHWAY	Fanconi Anemia Pathway	36	0.4796	1.5632	0.0184843	0.0698396	1	4614	tags=56%, list=31%, signal=81%
Hallmarks	HALLMARK_HEME_METABOLISM	Heme Metabolism	155	0.3674	1.5605	0.0017331	0.020605	0.21	2427	tags=24%, list=16%, signal=28%
Reactome	REACTOME_TOLL_LIKE_RECEPTOR_CASCADES	Toll Like Receptor Cascades	133	0.3713	1.5583	0.00353357	0.0723173	1	1966	tags=23%, list=13%, signal=26%
Reactome	REACTOME_CARBOXYTERMINAL_POST_TRANSLATIONAL_MODIFICATIONS_OF_TUBULIN	Carboxyterminal Post Translational Modifications Of Tubulin	27	0.4983	1.5579	0.0362976	0.0720674	1	1850	tags=37%, list=13%, signal=42%
WikiPathways	WP_FIBRIN_COMPLEMENT_RECEPTOR_3_SIGNALING	Fibrin Complement Receptor 3 Signaling	24	0.5055	1.5578	0.0449219	0.115976	0.999	894	tags=25%, list=6%, signal=27%
Reactome	REACTOME_MITOTIC_G2_G2_M_PHASES	Mitotic G2 G2 M Phases	173	0.3529	1.555	0.00169779	0.0729244	1	2358	tags=34%, list=16%, signal=39%
Reactome	REACTOME_LAGGING_STRAND_SYNTHESIS	Lagging Strand Synthesis	20	0.5299	1.5527	0.0333333	0.0736346	1	2724	tags=55%, list=18%, signal=67%
Hallmarks	HALLMARK_INTERFERON_GAMMA_RESPONSE	Interferon Gamma Response	136	0.3685	1.5525	0.00178891	0.0211317	0.228	1739	tags=28%, list=12%, signal=31%
Hallmarks	HALLMARK_P53_PATHWAY	P53 Pathway	169	0.356	1.5482	0.00175747	0.0205415	0.235	2727	tags=27%, list=18%, signal=32%
WikiPathways	WP_SPINAL_CORD_INJURY	Spinal Cord Injury	76	0.4062	1.5475	0.00539568	0.123425	0.999	1021	tags=25%, list=7%, signal=27%
WikiPathways	WP_PLURIPOTENT_STEM_CELL_DIFFERENTIATION_PATHWAY	Pluripotent Stem Cell Differentiation Pathway	21	0.5199	1.5474	0.0430712	0.121338	0.999	1178	tags=38%, list=8%, signal=41%
Reactome	REACTOME_GPCR_LIGAND_BINDING	Gpcr Ligand Binding	93	0.3891	1.5459	0.0141093	0.0768494	1	924	tags=20%, list=6%, signal=22%
Reactome	REACTOME_FORMATION_OF_TUBULIN_FOLDING_INTERMEDIATES_BY_CCT_TRIC	Formation Of Tubulin Folding Intermediates By Cct Tric	19	0.5457	1.5457	0.0306513	0.0764809	1	3911	tags=63%, list=27%, signal=86%
WikiPathways	WP_EICOSANOID_METABOLISM_VIA_CYCLOOXYGENASES_COX	Eicosanoid Metabolism Via Cyclooxygenases Cox	15	0.5809	1.5382	0.0365112	0.127678	0.999	1280	tags=40%, list=9%, signal=44%
Reactome	REACTOME_RESOLUTION_OF_D_LOOP_STRUCTURES	Resolution Of D Loop Structures	33	0.4774	1.5366	0.023622	0.0814398	1	3655	tags=42%, list=25%, signal=56%
Reactome	REACTOME_RESPIRATORY_ELECTRON_TRANSPORT	Respiratory Electron Transport	136	0.359	1.5364	0.00356506	0.0810981	1	4213	tags=43%, list=29%, signal=60%
WikiPathways	WP_GLYCOLYSIS_AND_GLUCONEOGENESIS	Glycolysis And Gluconeogenesis	31	0.4812	1.5356	0.0287356	0.128013	0.999	1929	tags=29%, list=13%, signal=33%
WikiPathways	WP_IL26_SIGNALING	Il26 Signaling	33	0.4689	1.5331	0.037594	0.128296	0.999	1459	tags=27%, list=10%, signal=30%
Reactome	REACTOME_CLASS_I_MHC_MEDIATED_ANTIGEN_PROCESSING_PRESENTATION	Class I Mhc Mediated Antigen Processing Presentation	317	0.3253	1.527	0	0.0863933	1	3550	tags=33%, list=24%, signal=43%
Reactome	REACTOME_APOPTOSIS	Apoptosis	144	0.36	1.5264	0.00336134	0.0862302	1	3028	tags=38%, list=21%, signal=47%
WikiPathways	WP_TAR_SYNDROME	Tar Syndrome	39	0.4505	1.5241	0.0171103	0.135033	0.999	3154	tags=41%, list=21%, signal=52%
WikiPathways	WP_MOLECULAR_PATHWAY_FOR_OXIDATIVE_STRESS	Molecular Pathway For Oxidative Stress	40	0.4548	1.5229	0.0251938	0.134027	0.999	1404	tags=20%, list=10%, signal=22%
Reactome	REACTOME_PROTEIN_LOCALIZATION	Protein Localization	143	0.356	1.5224	0.00177936	0.0882477	1	4253	tags=42%, list=29%, signal=58%
WikiPathways	WP_ONCOSTATIN_M_SIGNALING	Oncostatin M Signaling	62	0.4058	1.5216	0.0183824	0.133101	0.999	1522	tags=19%, list=10%, signal=21%
Reactome	REACTOME_DISEASES_OF_DNA_REPAIR	Diseases Of Dna Repair	49	0.4329	1.5192	0.0255941	0.0898344	1	3655	tags=41%, list=25%, signal=54%
Reactome	REACTOME_CLASS_A_1_RHODOPSIN_LIKE_RECEPTORS	Class A 1 Rhodopsin Like Receptors	65	0.4076	1.5165	0.0205224	0.0911024	1	924	tags=23%, list=6%, signal=25%
Reactome	REACTOME_E2F_MEDIATED_REGULATION_OF_DNA_REPLICATION	E2F Mediated Regulation Of Dna Replication	21	0.5104	1.5084	0.0480962	0.0957523	1	3539	tags=62%, list=24%, signal=81%
WikiPathways	WP_REGULATION_OF_TOLLLIKE_RECEPTOR_SIGNALING	Regulation Of Tolllike Receptor Signaling	93	0.3814	1.5031	0.00927644	0.149386	1	1388	tags=22%, list=9%, signal=24%
WikiPathways	WP_FOLATE_METABOLISM	Folate Metabolism	36	0.4522	1.5022	0.0320755	0.147884	1	1037	tags=22%, list=7%, signal=24%
Reactome	REACTOME_CELL_CYCLE_CHECKPOINTS	Cell Cycle Checkpoints	267	0.3237	1.4988	0	0.101647	1	3698	tags=40%, list=25%, signal=53%
WikiPathways	WP_17P133_YWHAE_COPY_NUMBER_VARIATION	17P133 Ywhae Copy Number Variation	16	0.5531	1.4982	0.0517928	0.149648	1	3476	tags=56%, list=24%, signal=74%
WikiPathways	WP_COMPLEMENT_SYSTEM	Complement System	39	0.4361	1.4925	0.0366089	0.153553	1	456	tags=21%, list=3%, signal=21%
Reactome	REACTOME_INFLAMMASOMES	Inflammasomes	16	0.555	1.4921	0.0467836	0.105796	1	386	tags=25%, list=3%, signal=26%
Hallmarks	HALLMARK_EPITHELIAL_MESENCHYMAL_TRANSITION	Epithelial Mesenchymal Transition	158	0.3377	1.4822	0.0118644	0.0339515	0.382	2392	tags=30%, list=16%, signal=35%
WikiPathways	WP_ALZHEIMERS_DISEASE	Alzheimers Disease	201	0.3309	1.4813	0.00173913	0.162591	1	1979	tags=25%, list=13%, signal=29%
Reactome	REACTOME_SIGNALING_BY_ROBO_RECEPTORS	Signaling By Robo Receptors	182	0.335	1.4779	0.0156794	0.116249	1	3576	tags=35%, list=24%, signal=46%
Reactome	REACTOME_RESOLUTION_OF_D_LOOP_STRUCTURES_THROUGH_SYNTHESIS_DEPENDENT_STRAND_ANNEALING_SDSA	Resolution Of D Loop Structures Through Synthesis Dependent Strand Annealing Sdsa	26	0.4713	1.4776	0.0462428	0.115813	1	3655	tags=42%, list=25%, signal=56%
Reactome	REACTOME_POLYMERASE_SWITCHING_ON_THE_C_STRAND_OF_THE_TELOMERE	Polymerase Switching On The C Strand Of The Telomere	24	0.4886	1.4743	0.0600775	0.117959	1	3046	tags=50%, list=21%, signal=63%
WikiPathways	WP_ALZHEIMERS_DISEASE_AND_MIRNA_EFFECTS	Alzheimers Disease And Mirna Effects	201	0.3309	1.4718	0.00177305	0.17065	1	1979	tags=25%, list=13%, signal=29%
Reactome	REACTOME_MYD88_INDEPENDENT_TLR4_CASCADE	Myd88 Independent Tlr4 Cascade	97	0.3669	1.4716	0.00763359	0.119426	1	1966	tags=24%, list=13%, signal=27%
Reactome	REACTOME_CARGO_TRAFFICKING_TO_THE_PERICILIARY_MEMBRANE	Cargo Trafficking To The Periciliary Membrane	54	0.4105	1.4705	0.0318352	0.119604	1	4256	tags=50%, list=29%, signal=70%
Reactome	REACTOME_NEGATIVE_REGULATION_OF_FGFR3_SIGNALING	Negative Regulation Of Fgfr3 Signaling	20	0.5108	1.4639	0.0526316	0.124385	1	1811	tags=25%, list=12%, signal=28%
Reactome	REACTOME_BBSOME_MEDIATED_CARGO_TARGETING_TO_CILIUM	Bbsome Mediated Cargo Targeting To Cilium	21	0.5063	1.4629	0.0571992	0.124402	1	4925	tags=67%, list=33%, signal=100%
Reactome	REACTOME_ANTIGEN_PROCESSING_UBIQUITINATION_PROTEASOME_DEGRADATION	Antigen Processing Ubiquitination Proteasome Degradation	263	0.3174	1.4622	0	0.124261	1	3550	tags=33%, list=24%, signal=43%
Reactome	REACTOME_GAP_FILLING_DNA_REPAIR_SYNTHESIS_AND_LIGATION_IN_GG_NER	Gap Filling Dna Repair Synthesis And Ligation In Gg Ner	25	0.4823	1.462	0.0680412	0.123774	1	3616	tags=52%, list=25%, signal=69%
WikiPathways	WP_SENESCENCE_AND_AUTOPHAGY_IN_CANCER	Senescence And Autophagy In Cancer	88	0.3657	1.4593	0.0250896	0.182216	1	1259	tags=18%, list=9%, signal=20%
WikiPathways	WP_HEREDITARY_LEIOMYOMATOSIS_AND_RENAL_CELL_CARCINOMA_PATHWAY	Hereditary Leiomyomatosis And Renal Cell Carcinoma Pathway	19	0.5158	1.4581	0.0451745	0.180938	1	1971	tags=42%, list=13%, signal=49%
Reactome	REACTOME_TELOMERE_C_STRAND_LAGGING_STRAND_SYNTHESIS	Telomere C Strand Lagging Strand Synthesis	32	0.4584	1.458	0.0495238	0.126386	1	3046	tags=47%, list=21%, signal=59%
WikiPathways	WP_MIRTARGETED_GENES_IN_LEUKOCYTES	Mirtargeted Genes In Leukocytes	120	0.351	1.4571	0.0115894	0.17966	1	2872	tags=28%, list=19%, signal=35%
Reactome	REACTOME_MITOCHONDRIAL_TRANSLATION_ELONGATION	Mitochondrial Translation Elongation	85	0.3703	1.4553	0.0268817	0.128206	1	4669	tags=48%, list=32%, signal=70%
WikiPathways	WP_TRYPTOPHAN_METABOLISM	Tryptophan Metabolism	18	0.5168	1.4526	0.0683594	0.182343	1	1651	tags=28%, list=11%, signal=31%
Reactome	REACTOME_POST_CHAPERONIN_TUBULIN_FOLDING_PATHWAY	Post Chaperonin Tubulin Folding Pathway	16	0.5343	1.4523	0.0746562	0.130027	1	2472	tags=44%, list=17%, signal=52%
WikiPathways	WP_DNA_MISMATCH_REPAIR	Dna Mismatch Repair	23	0.4891	1.4418	0.0800745	0.19261	1	3616	tags=57%, list=25%, signal=75%
Reactome	REACTOME_INTERACTION_BETWEEN_L1_AND_ANKYRINS	Interaction Between L1 And Ankyrins	16	0.5259	1.4387	0.0693878	0.141394	1	909	tags=31%, list=6%, signal=33%
Reactome	REACTOME_PTEN_REGULATION	Pten Regulation	115	0.3507	1.4387	0.0222222	0.140768	1	3473	tags=37%, list=24%, signal=49%
Reactome	REACTOME_DEVELOPMENTAL_CELL_LINEAGES	Developmental Cell Lineages	57	0.3929	1.4383	0.03861	0.140357	1	1406	tags=25%, list=10%, signal=27%
Reactome	REACTOME_ER_TO_GOLGI_ANTEROGRADE_TRANSPORT	Er To Golgi Anterograde Transport	130	0.3425	1.4373	0.0139616	0.140583	1	3476	tags=32%, list=24%, signal=42%
WikiPathways	WP_NEOVASCULARIZATION_PROCESSES	Neovascularization Processes	30	0.4466	1.4314	0.0647619	0.203224	1	1000	tags=20%, list=7%, signal=21%
WikiPathways	WP_P53_TRANSCRIPTIONAL_GENE_NETWORK	P53 Transcriptional Gene Network	71	0.3838	1.4298	0.0325048	0.202494	1	917	tags=14%, list=6%, signal=15%
Reactome	REACTOME_DENGUE_VIRUS_ACTIVATES_MODULATES_INNATE_AND_ADAPTIVE_IMMUNE_RESPONSES	Dengue Virus Activates Modulates Innate And Adaptive Immune Responses	21	0.4872	1.4291	0.08413	0.147347	1	1916	tags=24%, list=13%, signal=27%
Reactome	REACTOME_CLASS_I_PEROXISOMAL_MEMBRANE_PROTEIN_IMPORT	Class I Peroxisomal Membrane Protein Import	19	0.5038	1.4284	0.0684647	0.147277	1	3495	tags=47%, list=24%, signal=62%
Reactome	REACTOME_MITOCHONDRIAL_TRANSLATION	Mitochondrial Translation	96	0.3617	1.4266	0.019305	0.148296	1	4669	tags=47%, list=32%, signal=68%
WikiPathways	WP_CHRONIC_HYPERGLYCEMIA_IMPAIRMENT_OF_NEURON_FUNCTION	Chronic Hyperglycemia Impairment Of Neuron Function	29	0.4499	1.4241	0.0625	0.207539	1	909	tags=24%, list=6%, signal=26%
Reactome	REACTOME_MET_ACTIVATES_PTK2_SIGNALING	Met Activates Ptk2 Signaling	22	0.4796	1.422	0.0643275	0.151914	1	632	tags=23%, list=4%, signal=24%
WikiPathways	WP_HEMATOPOIETIC_STEM_CELL_DIFFERENTIATION	Hematopoietic Stem Cell Differentiation	25	0.4722	1.4218	0.1	0.208	1	1407	tags=32%, list=10%, signal=35%
WikiPathways	WP_HEPATITIS_C_AND_HEPATOCELLULAR_CARCINOMA	Hepatitis C And Hepatocellular Carcinoma	44	0.4082	1.4201	0.0521415	0.207309	1	1522	tags=25%, list=10%, signal=28%
WikiPathways	WP_APOPTOSIS	Apoptosis	71	0.3683	1.4193	0.0289116	0.205822	1	2190	tags=30%, list=15%, signal=35%
WikiPathways	WP_TYPE_I_INTERFERON_INDUCTION_AND_SIGNALING_DURING_SARSCOV2_INFECTION	Type I Interferon Induction And Signaling During Sarscov2 Infection	23	0.4802	1.4179	0.0782779	0.20477	1	1474	tags=22%, list=10%, signal=24%
Reactome	REACTOME_SIGNALING_BY_RETINOIC_ACID	Signaling By Retinoic Acid	25	0.4613	1.4169	0.0751445	0.155937	1	635	tags=16%, list=4%, signal=17%
WikiPathways	WP_RANKLRANK_SIGNALING	Ranklrank Signaling	50	0.3967	1.4112	0.0465116	0.210933	1	981	tags=20%, list=7%, signal=21%
Reactome	REACTOME_TURBULENT_OSCILLATORY_DISTURBED_FLOW_SHEAR_STRESS_ACTIVATES_SIGNALING_BY_PIEZO1_AND_INTEGRINS_IN_ENDOTHELIAL_CELLS	Turbulent Oscillatory Disturbed Flow Shear Stress Activates Signaling By Piezo1 And Integrins In Endothelial Cells	29	0.4422	1.4075	0.0962672	0.164685	1	2002	tags=28%, list=14%, signal=32%
WikiPathways	WP_CONSTITUTIVE_ANDROSTANE_RECEPTOR_PATHWAY	Constitutive Androstane Receptor Pathway	17	0.4999	1.4033	0.108163	0.218819	1	1123	tags=24%, list=8%, signal=25%
Reactome	REACTOME_TNFR1_INDUCED_NF_KAPPA_B_SIGNALING_PATHWAY	Tnfr1 Induced Nf Kappa B Signaling Pathway	32	0.4406	1.4017	0.0745098	0.169716	1	2190	tags=28%, list=15%, signal=33%
Reactome	REACTOME_PROCESSIVE_SYNTHESIS_ON_THE_LAGGING_STRAND	Processive Synthesis On The Lagging Strand	15	0.5195	1.4009	0.115385	0.169629	1	2526	tags=53%, list=17%, signal=64%
Reactome	REACTOME_MAPK1_MAPK3_SIGNALING	Mapk1 Mapk3 Signaling	192	0.3159	1.4001	0.016835	0.169654	1	2013	tags=23%, list=14%, signal=27%
WikiPathways	WP_NOVEL_INTRACELLULAR_COMPONENTS_OF_RIGILIKE_RECEPTOR_PATHWAY	Novel Intracellular Components Of Rigilike Receptor Pathway	46	0.399	1.3985	0.0536398	0.222907	1	1474	tags=22%, list=10%, signal=24%
Reactome	REACTOME_INTERLEUKIN_12_SIGNALING	Interleukin 12 Signaling	37	0.4285	1.3947	0.0625	0.174386	1	1652	tags=27%, list=11%, signal=30%
WikiPathways	WP_IMMUNE_INFILTRATION_IN_PANCREATIC_CANCER	Immune Infiltration In Pancreatic Cancer	16	0.5042	1.392	0.114919	0.22922	1	1568	tags=44%, list=11%, signal=49%
Reactome	REACTOME_DUAL_INCISION_IN_GG_NER	Dual Incision In Gg Ner	40	0.4084	1.3914	0.0690335	0.177393	1	3824	tags=45%, list=26%, signal=61%
WikiPathways	WP_COMPLEMENT_SYSTEM_IN_NEURONAL_DEVELOPMENT_AND_PLASTICITY	Complement System In Neuronal Development And Plasticity	59	0.3769	1.391	0.0497132	0.227742	1	1874	tags=24%, list=13%, signal=27%
Reactome	REACTOME_CILIUM_ASSEMBLY	Cilium Assembly	172	0.3165	1.3895	0.0137457	0.178489	1	4326	tags=43%, list=29%, signal=60%
Reactome	REACTOME_DEVELOPMENTAL_LINEAGE_OF_PANCREATIC_DUCTAL_CELLS	Developmental Lineage Of Pancreatic Ductal Cells	23	0.4624	1.3855	0.106996	0.182189	1	632	tags=26%, list=4%, signal=27%
WikiPathways	WP_FGFR3_SIGNALING_IN_CHONDROCYTE_PROLIFERATION_AND_TERMINAL_DIFFERENTIATION	Fgfr3 Signaling In Chondrocyte Proliferation And Terminal Differentiation	19	0.4804	1.3831	0.107505	0.235373	1	2957	tags=42%, list=20%, signal=53%
WikiPathways	WP_CYTOSOLIC_DNASENSING_PATHWAY	Cytosolic Dnasensing Pathway	46	0.4	1.3802	0.0682657	0.236785	1	2692	tags=33%, list=18%, signal=40%
Reactome	REACTOME_ANTIMICROBIAL_MECHANISM_OF_IFN_STIMULATED_GENES	Antimicrobial Mechanism Of Ifn Stimulated Genes	141	0.3241	1.3787	0.0301418	0.188978	1	3770	tags=34%, list=26%, signal=45%
WikiPathways	WP_APOPTOSIS_MODULATION_BY_HSP70	Apoptosis Modulation By Hsp70	17	0.4935	1.3749	0.0814664	0.241324	1	1737	tags=41%, list=12%, signal=47%
Reactome	REACTOME_DEUBIQUITINATION	Deubiquitination	233	0.3044	1.3715	0.0141343	0.196649	1	3564	tags=31%, list=24%, signal=41%
WikiPathways	WP_NUCLEOTIDE_EXCISION_REPAIR	Nucleotide Excision Repair	41	0.399	1.3701	0.077821	0.245854	1	3824	tags=46%, list=26%, signal=62%
Reactome	REACTOME_CYTOSOLIC_SENSORS_OF_PATHOGEN_ASSOCIATED_DNA	Cytosolic Sensors Of Pathogen Associated Dna	59	0.372	1.3689	0.0612613	0.19887	1	1841	tags=20%, list=12%, signal=23%
Reactome	REACTOME_PROCESSIVE_SYNTHESIS_ON_THE_C_STRAND_OF_THE_TELOMERE	Processive Synthesis On The C Strand Of The Telomere	19	0.4756	1.3675	0.129666	0.199666	1	4137	tags=58%, list=28%, signal=80%
WikiPathways	WP_GENES_RELATED_TO_PRIMARY_CILIUM_DEVELOPMENT_BASED_ON_CRISPR	Genes Related To Primary Cilium Development Based On Crispr	99	0.3404	1.3621	0.0480427	0.254747	1	3735	tags=35%, list=25%, signal=47%
Hallmarks	HALLMARK_ANGIOGENESIS	Angiogenesis	24	0.4524	1.3604	0.107345	0.0847755	0.695	960	tags=21%, list=7%, signal=22%
Reactome	REACTOME_NICOTINATE_METABOLISM	Nicotinate Metabolism	21	0.468	1.3579	0.119284	0.210756	1	3536	tags=43%, list=24%, signal=56%
Reactome	REACTOME_ATF4_ACTIVATES_GENES_IN_RESPONSE_TO_ENDOPLASMIC_RETICULUM_STRESS	Atf4 Activates Genes In Response To Endoplasmic Reticulum Stress	25	0.444	1.3579	0.119923	0.209789	1	2469	tags=36%, list=17%, signal=43%
WikiPathways	WP_8Q1123_RB1CC1_COPY_NUMBER_VARIATION	8Q1123 Rb1Cc1 Copy Number Variation	15	0.5005	1.356	0.117172	0.261093	1	4008	tags=33%, list=27%, signal=46%
Reactome	REACTOME_TRANSCRIPTION_COUPLED_NUCLEOTIDE_EXCISION_REPAIR_TC_NER	Transcription Coupled Nucleotide Excision Repair Tc Ner	74	0.3566	1.3539	0.060177	0.21402	1	3947	tags=39%, list=27%, signal=53%
WikiPathways	WP_15Q25_COPY_NUMBER_VARIATION	15Q25 Copy Number Variation	30	0.4233	1.3518	0.0887097	0.26434	1	348	tags=10%, list=2%, signal=10%
Reactome	REACTOME_NEF_MEDIATES_DOWN_MODULATION_OF_CELL_SURFACE_RECEPTORS_BY_RECRUITING_THEM_TO_CLATHRIN_ADAPTERS	Nef Mediates Down Modulation Of Cell Surface Receptors By Recruiting Them To Clathrin Adapters	16	0.5002	1.3507	0.130097	0.216887	1	1131	tags=13%, list=8%, signal=14%
WikiPathways	WP_OREXIN_RECEPTOR_PATHWAY	Orexin Receptor Pathway	136	0.3219	1.3479	0.0303571	0.267211	1	1035	tags=15%, list=7%, signal=16%
Reactome	REACTOME_SMOOTH_MUSCLE_CONTRACTION	Smooth Muscle Contraction	27	0.4242	1.3479	0.0918367	0.219297	1	2899	tags=41%, list=20%, signal=51%
Reactome	REACTOME_SEALING_OF_THE_NUCLEAR_ENVELOPE_NE_BY_ESCRT_III	Sealing Of The Nuclear Envelope Ne By Escrt Iii	22	0.4661	1.3459	0.110664	0.221194	1	3305	tags=45%, list=22%, signal=58%
Reactome	REACTOME_REGULATION_OF_T_CELL_ACTIVATION_BY_CD28_FAMILY	Regulation Of T Cell Activation By Cd28 Family	213	0.2986	1.3448	0.0216998	0.221624	1	2265	tags=24%, list=15%, signal=28%
WikiPathways	WP_DNA_REPAIR_PATHWAYS_FULL_NETWORK	Dna Repair Pathways Full Network	116	0.3245	1.3445	0.0346715	0.269654	1	3828	tags=40%, list=26%, signal=53%
WikiPathways	WP_TGFBETA_RECEPTOR_SIGNALING	Tgfbeta Receptor Signaling	43	0.3853	1.3438	0.0747663	0.267861	1	596	tags=16%, list=4%, signal=17%
WikiPathways	WP_MITOCHONDRIAL_COMPLEX_I_ASSEMBLY_MODEL_OXPHOS_SYSTEM	Mitochondrial Complex I Assembly Model Oxphos System	48	0.3814	1.3419	0.0909091	0.268648	1	5150	tags=56%, list=35%, signal=86%
WikiPathways	WP_EXTRACELLULAR_VESICLES_IN_THE_CROSSTALK_OF_CARDIAC_CELLS	Extracellular Vesicles In The Crosstalk Of Cardiac Cells	16	0.4987	1.341	0.137577	0.267129	1	647	tags=25%, list=4%, signal=26%
WikiPathways	WP_NONGENOMIC_ACTIONS_OF_125DIHYDROXYVITAMIN_D3	Nongenomic Actions Of 125Dihydroxyvitamin D3	50	0.3706	1.3397	0.0998152	0.266642	1	1535	tags=22%, list=10%, signal=24%
Reactome	REACTOME_NOD1_2_SIGNALING_PATHWAY	Nod1 2 Signaling Pathway	31	0.4267	1.3372	0.0957854	0.231011	1	3648	tags=45%, list=25%, signal=60%
Reactome	REACTOME_INFECTION_WITH_ENTEROBACTERIA	Infection With Enterobacteria	28	0.4231	1.3329	0.111324	0.235751	1	2131	tags=29%, list=14%, signal=33%
Reactome	REACTOME_HDR_THROUGH_SINGLE_STRAND_ANNEALING_SSA	Hdr Through Single Strand Annealing Ssa	35	0.4078	1.331	0.111111	0.23734	1	3655	tags=40%, list=25%, signal=53%
Reactome	REACTOME_TAK1_DEPENDENT_IKK_AND_NF_KAPPA_B_ACTIVATION	Tak1 Dependent Ikk And Nf Kappa B Activation	38	0.3908	1.3269	0.102	0.242042	1	1886	tags=24%, list=13%, signal=27%
Reactome	REACTOME_DUAL_INCISION_IN_TC_NER	Dual Incision In Tc Ner	61	0.3624	1.3267	0.070018	0.241163	1	3837	tags=38%, list=26%, signal=51%
WikiPathways	WP_MYOMETRIAL_RELAXATION_AND_CONTRACTION_PATHWAYS	Myometrial Relaxation And Contraction Pathways	103	0.3263	1.3266	0.0545455	0.2838	1	1632	tags=20%, list=11%, signal=23%
Reactome	REACTOME_MHC_CLASS_II_ANTIGEN_PRESENTATION	Mhc Class Ii Antigen Presentation	92	0.3321	1.3237	0.0574506	0.244262	1	2475	tags=24%, list=17%, signal=29%
Reactome	REACTOME_BETA_CATENIN_INDEPENDENT_WNT_SIGNALING	Beta Catenin Independent Wnt Signaling	108	0.3247	1.3207	0.0599647	0.247542	1	1811	tags=25%, list=12%, signal=28%
Reactome	REACTOME_MET_PROMOTES_CELL_MOTILITY	Met Promotes Cell Motility	32	0.4	1.3183	0.114437	0.249547	1	632	tags=16%, list=4%, signal=16%
WikiPathways	WP_DNA_REPLICATION	Dna Replication	41	0.3868	1.3181	0.105163	0.294151	1	2974	tags=44%, list=20%, signal=55%
Reactome	REACTOME_DEATH_RECEPTOR_SIGNALING	Death Receptor Signaling	130	0.3093	1.3173	0.0697674	0.249669	1	1811	tags=22%, list=12%, signal=24%
Reactome	REACTOME_COMPLEX_I_BIOGENESIS	Complex I Biogenesis	58	0.3652	1.3155	0.0949612	0.251067	1	4142	tags=43%, list=28%, signal=60%
Reactome	REACTOME_VISUAL_PHOTOTRANSDUCTION	Visual Phototransduction	48	0.3757	1.3122	0.109615	0.254634	1	968	tags=17%, list=7%, signal=18%
Reactome	REACTOME_PKR_MEDIATED_SIGNALING	Pkr Mediated Signaling	63	0.3534	1.311	0.0830325	0.255206	1	2610	tags=29%, list=18%, signal=35%
Reactome	REACTOME_COLLAGEN_DEGRADATION	Collagen Degradation	38	0.3956	1.3094	0.117647	0.256174	1	786	tags=21%, list=5%, signal=22%
Hallmarks	HALLMARK_PROTEIN_SECRETION	Protein Secretion	91	0.3302	1.3094	0.0723327	0.121684	0.834	3383	tags=24%, list=23%, signal=31%
Reactome	REACTOME_RSV_HOST_INTERACTIONS	Rsv Host Interactions	74	0.3371	1.3089	0.0812274	0.255756	1	2716	tags=31%, list=18%, signal=38%
WikiPathways	WP_OPIOID_RECEPTOR_PATHWAYS	Opioid Receptor Pathways	30	0.413	1.308	0.125984	0.308072	1	647	tags=17%, list=4%, signal=17%
WikiPathways	WP_HOSTPATHOGEN_INTERACTION_OF_HUMAN_CORONAVIRUSES_INTERFERON_INDUCTION	Hostpathogen Interaction Of Human Coronaviruses Interferon Induction	28	0.4172	1.3073	0.117895	0.30651	1	554	tags=14%, list=4%, signal=15%
Reactome	REACTOME_ASSEMBLY_OF_COLLAGEN_FIBRILS_AND_OTHER_MULTIMERIC_STRUCTURES	Assembly Of Collagen Fibrils And Other Multimeric Structures	39	0.3867	1.3058	0.12831	0.25905	1	632	tags=15%, list=4%, signal=16%
Reactome	REACTOME_NEGATIVE_REGULATORS_OF_DDX58_IFIH1_SIGNALING	Negative Regulators Of Ddx58 Ifih1 Signaling	31	0.4047	1.3056	0.128253	0.258235	1	3356	tags=39%, list=23%, signal=50%
Reactome	REACTOME_METABOLISM_OF_STEROID_HORMONES	Metabolism Of Steroid Hormones	15	0.4913	1.3023	0.159763	0.262094	1	861	tags=27%, list=6%, signal=28%
Reactome	REACTOME_INTERLEUKIN_12_FAMILY_SIGNALING	Interleukin 12 Family Signaling	42	0.385	1.2994	0.113772	0.265055	1	1652	tags=24%, list=11%, signal=27%
Reactome	REACTOME_MAPK_FAMILY_SIGNALING_CASCADES	Mapk Family Signaling Cascades	229	0.285	1.2963	0.0457746	0.268864	1	2038	tags=22%, list=14%, signal=25%
Reactome	REACTOME_G_ALPHA_I_SIGNALLING_EVENTS	G Alpha I Signalling Events	116	0.3122	1.2954	0.0630798	0.269078	1	1281	tags=15%, list=9%, signal=16%
Reactome	REACTOME_ASSEMBLY_AND_CELL_SURFACE_PRESENTATION_OF_NMDA_RECEPTORS	Assembly And Cell Surface Presentation Of Nmda Receptors	24	0.4293	1.2879	0.164093	0.278802	1	1413	tags=25%, list=10%, signal=28%
WikiPathways	WP_NANOMATERIAL_INDUCED_APOPTOSIS	Nanomaterial Induced Apoptosis	17	0.4601	1.2865	0.168067	0.339597	1	2568	tags=41%, list=17%, signal=50%
WikiPathways	WP_22Q112_COPY_NUMBER_VARIATION_SYNDROME	22Q112 Copy Number Variation Syndrome	81	0.3305	1.2821	0.110294	0.344363	1	2013	tags=23%, list=14%, signal=27%
Hallmarks	HALLMARK_ALLOGRAFT_REJECTION	Allograft Rejection	96	0.3168	1.2759	0.0785441	0.150519	0.908	1855	tags=24%, list=13%, signal=27%
Reactome	REACTOME_FATTY_ACID_METABOLISM	Fatty Acid Metabolism	121	0.305	1.2709	0.0896057	0.304158	1	1322	tags=15%, list=9%, signal=16%
Reactome	REACTOME_TRANSPORT_OF_SMALL_MOLECULES	Transport Of Small Molecules	431	0.2591	1.2708	0.0185185	0.303129	1	1811	tags=19%, list=12%, signal=21%
WikiPathways	WP_OXIDATIVE_DAMAGE_RESPONSE	Oxidative Damage Response	29	0.4026	1.2701	0.173333	0.363519	1	3433	tags=38%, list=23%, signal=49%
WikiPathways	WP_OMEGA3FATTY_ACIDS_IN_SENESCENCE	Omega3Fatty Acids In Senescence	16	0.4629	1.2697	0.178357	0.360749	1	1322	tags=38%, list=9%, signal=41%
WikiPathways	WP_BLADDER_CANCER	Bladder Cancer	37	0.3854	1.269	0.163107	0.358768	1	1263	tags=22%, list=9%, signal=24%
Reactome	REACTOME_GLOBAL_GENOME_NUCLEOTIDE_EXCISION_REPAIR_GG_NER	Global Genome Nucleotide Excision Repair Gg Ner	80	0.3241	1.2682	0.100173	0.306027	1	4067	tags=39%, list=28%, signal=53%
WikiPathways	WP_VITAMIN_D_RECEPTOR_PATHWAY	Vitamin D Receptor Pathway	90	0.318	1.2649	0.101449	0.363152	1	1360	tags=20%, list=9%, signal=22%
Reactome	REACTOME_CONSTITUTIVE_SIGNALING_BY_ABERRANT_PI3K_IN_CANCER	Constitutive Signaling By Aberrant Pi3K In Cancer	48	0.3565	1.2648	0.138434	0.310639	1	594	tags=19%, list=4%, signal=19%
Reactome	REACTOME_ACTIVATION_OF_AMPK_DOWNSTREAM_OF_NMDARS	Activation Of Ampk Downstream Of Nmdars	18	0.4557	1.2608	0.166337	0.315992	1	2472	tags=33%, list=17%, signal=40%
Reactome	REACTOME_PLATELET_ACTIVATION_SIGNALING_AND_AGGREGATION	Platelet Activation Signaling And Aggregation	174	0.2847	1.2586	0.0741379	0.318457	1	1735	tags=15%, list=12%, signal=17%
WikiPathways	WP_2Q13_COPY_NUMBER_VARIATION_SYNDROME	2Q13 Copy Number Variation Syndrome	40	0.3723	1.2547	0.150558	0.378826	1	1037	tags=13%, list=7%, signal=13%
WikiPathways	WP_TGFBETA_RECEPTOR_SIGNALING_IN_SKELETAL_DYSPLASIAS	Tgfbeta Receptor Signaling In Skeletal Dysplasias	45	0.3655	1.2546	0.138783	0.375532	1	596	tags=16%, list=4%, signal=16%
WikiPathways	WP_CANCER_PATHWAYS	Cancer Pathways	346	0.2631	1.253	0.0275527	0.37528	1	1590	tags=16%, list=11%, signal=17%
WikiPathways	WP_AFFECTED_PATHWAYS_IN_DUCHENNE_MUSCULAR_DYSTROPHY	Affected Pathways In Duchenne Muscular Dystrophy	47	0.3521	1.2527	0.16185	0.372482	1	1749	tags=21%, list=12%, signal=24%
Reactome	REACTOME_PCNA_DEPENDENT_LONG_PATCH_BASE_EXCISION_REPAIR	Pcna Dependent Long Patch Base Excision Repair	21	0.4289	1.2492	0.177024	0.33279	1	3828	tags=57%, list=26%, signal=77%
Reactome	REACTOME_APOPTOTIC_FACTOR_MEDIATED_RESPONSE	Apoptotic Factor Mediated Response	19	0.4386	1.2441	0.196116	0.340482	1	3508	tags=37%, list=24%, signal=48%
Reactome	REACTOME_M_PHASE	M Phase	370	0.259	1.2433	0.0430464	0.340616	1	3811	tags=34%, list=26%, signal=45%
Reactome	REACTOME_RESPONSE_OF_EIF2AK1_HRI_TO_HEME_DEFICIENCY	Response Of Eif2Ak1 Hri To Heme Deficiency	15	0.4695	1.2428	0.17357	0.340252	1	4610	tags=67%, list=31%, signal=97%
WikiPathways	WP_EBOLA_VIRUS_INFECTION_IN_HOST	Ebola Virus Infection In Host	92	0.3076	1.2385	0.107861	0.396995	1	833	tags=13%, list=6%, signal=14%
Reactome	REACTOME_RESPIRATORY_SYNCYTIAL_VIRUS_INFECTION_PATHWAY	Respiratory Syncytial Virus Infection Pathway	96	0.3051	1.2375	0.105079	0.348299	1	3338	tags=33%, list=23%, signal=43%
WikiPathways	WP_HOSTPATHOGEN_INTERACTION_OF_HUMAN_CORONAVIRUSES_AUTOPHAGY	Hostpathogen Interaction Of Human Coronaviruses Autophagy	18	0.4273	1.2362	0.201887	0.397906	1	4348	tags=44%, list=29%, signal=63%
WikiPathways	WP_MAPK_SIGNALING	Mapk Signaling	179	0.278	1.2355	0.0830389	0.395896	1	683	tags=11%, list=5%, signal=12%
WikiPathways	WP_INFLAMMATORY_BOWEL_DISEASE_SIGNALING	Inflammatory Bowel Disease Signaling	18	0.4319	1.2353	0.210117	0.392812	1	2104	tags=39%, list=14%, signal=45%
WikiPathways	WP_PRIMARY_OVARIAN_INSUFFICIENCY	Primary Ovarian Insufficiency	94	0.3078	1.2352	0.115658	0.389642	1	2655	tags=29%, list=18%, signal=35%
Reactome	REACTOME_ROS_AND_RNS_PRODUCTION_IN_PHAGOCYTES	Ros And Rns Production In Phagocytes	22	0.4178	1.2348	0.190669	0.351754	1	2481	tags=36%, list=17%, signal=44%
WikiPathways	WP_MEASLES_VIRUS_INFECTION	Measles Virus Infection	96	0.304	1.2302	0.122414	0.396015	1	1474	tags=17%, list=10%, signal=18%
Reactome	REACTOME_MISMATCH_REPAIR	Mismatch Repair	15	0.4623	1.2294	0.234127	0.360389	1	2526	tags=40%, list=17%, signal=48%
Reactome	REACTOME_AEROBIC_RESPIRATION_AND_RESPIRATORY_ELECTRON_TRANSPORT	Aerobic Respiration And Respiratory Electron Transport	223	0.2734	1.2289	0.0761589	0.359807	1	4251	tags=38%, list=29%, signal=52%
WikiPathways	WP_NUCLEOTIDE_EXCISION_REPAIR_IN_XERODERMA_PIGMENTOSUM	Nucleotide Excision Repair In Xeroderma Pigmentosum	68	0.3212	1.2288	0.137363	0.395154	1	2724	tags=28%, list=18%, signal=34%
WikiPathways	WP_GPCRS_OTHER	Gpcrs Other	22	0.4136	1.2275	0.190661	0.394293	1	924	tags=23%, list=6%, signal=24%
Hallmarks	HALLMARK_BILE_ACID_METABOLISM	Bile Acid Metabolism	71	0.3207	1.227	0.137993	0.204052	0.962	3506	tags=39%, list=24%, signal=51%
Reactome	REACTOME_COLLAGEN_FORMATION	Collagen Formation	57	0.3382	1.2198	0.167587	0.375243	1	734	tags=16%, list=5%, signal=17%
Reactome	REACTOME_METABOLISM_OF_NUCLEOTIDES	Metabolism Of Nucleotides	79	0.3173	1.2192	0.133945	0.375039	1	2631	tags=22%, list=18%, signal=26%
WikiPathways	WP_METABOLISM_OF_SPHINGOLIPIDS_IN_ER_AND_GOLGI_APPARATUS	Metabolism Of Sphingolipids In Er And Golgi Apparatus	18	0.4224	1.2191	0.184971	0.407702	1	1567	tags=33%, list=11%, signal=37%
Reactome	REACTOME_PD_L1_CD274_GLYCOSYLATION_AND_TRANSLOCATION_TO_PLASMA_MEMBRANE	Pd L1 Cd274 Glycosylation And Translocation To Plasma Membrane	17	0.44	1.2175	0.203883	0.376674	1	3950	tags=47%, list=27%, signal=64%
Hallmarks	HALLMARK_INTERFERON_ALPHA_RESPONSE	Interferon Alpha Response	72	0.3189	1.2166	0.139925	0.210837	0.972	1770	tags=25%, list=12%, signal=28%
Reactome	REACTOME_NEUTROPHIL_DEGRANULATION	Neutrophil Degranulation	325	0.2585	1.2151	0.0621931	0.379788	1	3036	tags=24%, list=21%, signal=30%
WikiPathways	WP_MONOAMINE_TRANSPORT	Monoamine Transport	15	0.4614	1.2144	0.238095	0.413484	1	2047	tags=40%, list=14%, signal=46%
Reactome	REACTOME_TP53_REGULATES_TRANSCRIPTION_OF_CELL_DEATH_GENES	Tp53 Regulates Transcription Of Cell Death Genes	34	0.3672	1.2124	0.202312	0.383393	1	1176	tags=21%, list=8%, signal=22%
Reactome	REACTOME_NUCLEOTIDE_EXCISION_REPAIR	Nucleotide Excision Repair	104	0.2963	1.2122	0.140741	0.382437	1	4067	tags=36%, list=28%, signal=49%
Reactome	REACTOME_LYSOSOME_VESICLE_BIOGENESIS	Lysosome Vesicle Biogenesis	30	0.3761	1.2121	0.194969	0.380979	1	176	tags=7%, list=1%, signal=7%
Reactome	REACTOME_HOMOLOGY_DIRECTED_REPAIR	Homology Directed Repair	123	0.2895	1.2121	0.118761	0.379544	1	3688	tags=33%, list=25%, signal=43%
Reactome	REACTOME_TRAF6_MEDIATED_NF_KB_ACTIVATION	Traf6 Mediated Nf Kb Activation	20	0.4196	1.2115	0.182365	0.379185	1	1886	tags=25%, list=13%, signal=29%
WikiPathways	WP_VITAMIN_B12_METABOLISM	Vitamin B12 Metabolism	28	0.3793	1.2095	0.215094	0.4197	1	1269	tags=25%, list=9%, signal=27%
Reactome	REACTOME_TRANSPORT_TO_THE_GOLGI_AND_SUBSEQUENT_MODIFICATION	Transport To The Golgi And Subsequent Modification	154	0.2841	1.2086	0.108108	0.383075	1	2475	tags=22%, list=17%, signal=26%
Reactome	REACTOME_PROTEIN_FOLDING	Protein Folding	74	0.3148	1.2063	0.149091	0.385922	1	3305	tags=34%, list=22%, signal=43%
Reactome	REACTOME_EARLY_SARS_COV_2_INFECTION_EVENTS	Early Sars Cov 2 Infection Events	32	0.3679	1.2051	0.197441	0.386545	1	2772	tags=31%, list=19%, signal=38%
Reactome	REACTOME_P75NTR_SIGNALS_VIA_NF_KB	P75Ntr Signals Via Nf Kb	15	0.4457	1.2033	0.250485	0.388444	1	419	tags=13%, list=3%, signal=14%
WikiPathways	WP_HDAC6_INTERACTIONS_IN_THE_CENTRAL_NERVOUS_SYSTEM	Hdac6 Interactions In The Central Nervous System	92	0.3	1.2026	0.150838	0.430524	1	2324	tags=22%, list=16%, signal=26%
Reactome	REACTOME_TP53_REGULATES_METABOLIC_GENES	Tp53 Regulates Metabolic Genes	66	0.3222	1.2007	0.181004	0.39195	1	2136	tags=21%, list=14%, signal=25%
WikiPathways	WP_THYMIC_STROMAL_LYMPHOPOIETIN_TSLP_SIGNALING	Thymic Stromal Lymphopoietin Tslp Signaling	37	0.3631	1.1991	0.208577	0.433991	1	1012	tags=19%, list=7%, signal=20%
WikiPathways	WP_COPPER_HOMEOSTASIS	Copper Homeostasis	36	0.3556	1.195	0.201942	0.439317	1	1459	tags=25%, list=10%, signal=28%
Reactome	REACTOME_PHASE_0_RAPID_DEPOLARISATION	Phase 0 Rapid Depolarisation	15	0.4469	1.1943	0.243665	0.40327	1	1281	tags=27%, list=9%, signal=29%
WikiPathways	WP_2Q37_COPY_NUMBER_VARIATION_SYNDROME	2Q37 Copy Number Variation Syndrome	84	0.2983	1.1847	0.173835	0.457366	1	770	tags=13%, list=5%, signal=14%
WikiPathways	WP_NAD_METABOLISM_IN_ONCOGENEINDUCED_SENESCENCE_AND_MITOCHONDRIAL_DYSFUNCTIONASSOCIATED_SENESCENCE	Nad Metabolism In Oncogeneinduced Senescence And Mitochondrial Dysfunctionassociated Senescence	19	0.4047	1.1833	0.235727	0.45679	1	998	tags=16%, list=7%, signal=17%
WikiPathways	WP_ZINC_HOMEOSTASIS	Zinc Homeostasis	18	0.4207	1.1822	0.247934	0.455654	1	1861	tags=22%, list=13%, signal=25%
Reactome	REACTOME_FORMATION_OF_THE_CORNIFIED_ENVELOPE	Formation Of The Cornified Envelope	20	0.4052	1.1811	0.236686	0.428736	1	1594	tags=30%, list=11%, signal=34%
Reactome	REACTOME_CLASS_B_2_SECRETIN_FAMILY_RECEPTORS	Class B 2 Secretin Family Receptors	28	0.3724	1.1786	0.240385	0.432153	1	1495	tags=21%, list=10%, signal=24%
Reactome	REACTOME_SARS_COV_2_MODULATES_HOST_TRANSLATION_MACHINERY	Sars Cov 2 Modulates Host Translation Machinery	44	0.3426	1.1773	0.208566	0.433466	1	4825	tags=45%, list=33%, signal=67%
Hallmarks	HALLMARK_ESTROGEN_RESPONSE_LATE	Estrogen Response Late	133	0.2765	1.1742	0.163158	0.267461	0.988	826	tags=13%, list=6%, signal=13%
Reactome	REACTOME_RECRUITMENT_OF_NUMA_TO_MITOTIC_CENTROSOMES	Recruitment Of Numa To Mitotic Centrosomes	81	0.3033	1.1742	0.17963	0.438141	1	4087	tags=44%, list=28%, signal=61%
WikiPathways	WP_SODIUM_CHANNEL_IN_EPILEPSY	Sodium Channel In Epilepsy	22	0.3988	1.1732	0.246679	0.47119	1	986	tags=18%, list=7%, signal=19%
WikiPathways	WP_EMBRYONIC_STEM_CELL_PLURIPOTENCY_PATHWAYS	Embryonic Stem Cell Pluripotency Pathways	75	0.304	1.1691	0.198502	0.476224	1	1161	tags=13%, list=8%, signal=14%
Reactome	REACTOME_SIGNALING_BY_NOTCH	Signaling By Notch	193	0.2601	1.169	0.108734	0.447634	1	1364	tags=16%, list=9%, signal=17%
Reactome	REACTOME_SIGNALING_BY_GPCR	Signaling By Gpcr	265	0.2518	1.1687	0.108696	0.446623	1	1568	tags=15%, list=11%, signal=17%
Hallmarks	HALLMARK_DNA_REPAIR	Dna Repair	139	0.2769	1.1686	0.162749	0.266688	0.988	4167	tags=37%, list=28%, signal=51%
Reactome	REACTOME_RESOLUTION_OF_AP_SITES_VIA_THE_MULTIPLE_NUCLEOTIDE_PATCH_REPLACEMENT_PATHWAY	Resolution Of Ap Sites Via The Multiple Nucleotide Patch Replacement Pathway	25	0.3896	1.1666	0.248509	0.449465	1	3828	tags=52%, list=26%, signal=70%
Reactome	REACTOME_METABOLISM_OF_AMINO_ACIDS_AND_DERIVATIVES	Metabolism Of Amino Acids And Derivatives	268	0.251	1.1662	0.132075	0.448657	1	3646	tags=32%, list=25%, signal=41%
WikiPathways	WP_IL19_SIGNALING	Il19 Signaling	20	0.4023	1.1635	0.253012	0.484907	1	952	tags=15%, list=6%, signal=16%
Reactome	REACTOME_ACTIVATION_OF_THE_PRE_REPLICATIVE_COMPLEX	Activation Of The Pre Replicative Complex	32	0.361	1.1607	0.241176	0.458705	1	3616	tags=50%, list=25%, signal=66%
Reactome	REACTOME_REGULATION_OF_PLK1_ACTIVITY_AT_G2_M_TRANSITION	Regulation Of Plk1 Activity At G2 M Transition	81	0.2947	1.1602	0.215213	0.458165	1	4087	tags=46%, list=28%, signal=63%
Reactome	REACTOME_METABOLISM_OF_VITAMINS_AND_COFACTORS	Metabolism Of Vitamins And Cofactors	147	0.2731	1.1598	0.183422	0.457192	1	2499	tags=22%, list=17%, signal=27%
WikiPathways	WP_TRANSSULFURATION_ONECARBON_METABOLISM_AND_RELATED_PATHWAYS	Transsulfuration Onecarbon Metabolism And Related Pathways	47	0.3297	1.1593	0.2282	0.490469	1	1665	tags=21%, list=11%, signal=24%
Reactome	REACTOME_FORMATION_OF_TC_NER_PRE_INCISION_COMPLEX	Formation Of Tc Ner Pre Incision Complex	49	0.3258	1.1576	0.224299	0.460558	1	3837	tags=35%, list=26%, signal=47%
Reactome	REACTOME_NRIF_SIGNALS_CELL_DEATH_FROM_THE_NUCLEUS	Nrif Signals Cell Death From The Nucleus	15	0.4214	1.1573	0.279468	0.459513	1	2494	tags=33%, list=17%, signal=40%
Reactome	REACTOME_PERK_REGULATES_GENE_EXPRESSION	Perk Regulates Gene Expression	30	0.3624	1.1532	0.249493	0.466747	1	2469	tags=30%, list=17%, signal=36%
WikiPathways	WP_PHYSIOLOGICAL_AND_PATHOLOGICAL_HYPERTROPHY_OF_THE_HEART	Physiological And Pathological Hypertrophy Of The Heart	22	0.3897	1.153	0.257253	0.500937	1	554	tags=14%, list=4%, signal=14%
WikiPathways	WP_PROXIMAL_TUBULE_TRANSPORT	Proximal Tubule Transport	32	0.3545	1.151	0.270633	0.501742	1	1397	tags=25%, list=9%, signal=28%
Reactome	REACTOME_NUCLEAR_ENVELOPE_NE_REASSEMBLY	Nuclear Envelope Ne Reassembly	66	0.3027	1.1498	0.212569	0.472531	1	3602	tags=35%, list=24%, signal=46%
Reactome	REACTOME_INTERFERON_SIGNALING	Interferon Signaling	208	0.2533	1.1488	0.155405	0.47293	1	2082	tags=18%, list=14%, signal=21%
Reactome	REACTOME_HEMOSTASIS	Hemostasis	395	0.2383	1.1485	0.128205	0.47193	1	1566	tags=14%, list=11%, signal=15%
WikiPathways	WP_SARSCOV2_INNATE_IMMUNITY_EVASION_AND_CELLSPECIFIC_IMMUNE_RESPONSE	Sarscov2 Innate Immunity Evasion And Cellspecific Immune Response	40	0.339	1.1459	0.242026	0.509626	1	1376	tags=20%, list=9%, signal=22%
Hallmarks	HALLMARK_PI3K_AKT_MTOR_SIGNALING	Pi3K Akt Mtor Signaling	87	0.2915	1.1456	0.22686	0.294287	0.997	635	tags=9%, list=4%, signal=10%
Reactome	REACTOME_SELENOAMINO_ACID_METABOLISM	Selenoamino Acid Metabolism	105	0.2809	1.1448	0.197509	0.478482	1	3646	tags=28%, list=25%, signal=36%
Reactome	REACTOME_BINDING_AND_UPTAKE_OF_LIGANDS_BY_SCAVENGER_RECEPTORS	Binding And Uptake Of Ligands By Scavenger Receptors	20	0.3986	1.1438	0.275862	0.479064	1	2371	tags=40%, list=16%, signal=48%
Reactome	REACTOME_METABOLISM_OF_COFACTORS	Metabolism Of Cofactors	21	0.3932	1.1427	0.304609	0.47971	1	2670	tags=33%, list=18%, signal=41%
Reactome	REACTOME_BACTERIAL_INFECTION_PATHWAYS	Bacterial Infection Pathways	81	0.2931	1.1391	0.23913	0.486096	1	2131	tags=23%, list=14%, signal=27%
WikiPathways	WP_ACUTE_VIRAL_MYOCARDITIS	Acute Viral Myocarditis	58	0.3053	1.139	0.243043	0.520657	1	1522	tags=19%, list=10%, signal=21%
WikiPathways	WP_VASOPRESSINREGULATED_WATER_REABSORPTION	Vasopressinregulated Water Reabsorption	35	0.3417	1.1369	0.279926	0.521549	1	2058	tags=23%, list=14%, signal=26%
Reactome	REACTOME_ACTIVATION_OF_MATRIX_METALLOPROTEINASES	Activation Of Matrix Metalloproteinases	18	0.4077	1.1342	0.294355	0.495534	1	452	tags=17%, list=3%, signal=17%
Reactome	REACTOME_HSF1_ACTIVATION	Hsf1 Activation	23	0.3761	1.1327	0.272912	0.497252	1	4373	tags=65%, list=30%, signal=93%
Hallmarks	HALLMARK_TGF_BETA_SIGNALING	Tgf Beta Signaling	49	0.318	1.1324	0.277677	0.305448	0.998	638	tags=12%, list=4%, signal=13%
WikiPathways	WP_EXTRAFOLLICULAR_AND_FOLLICULAR_B_CELL_ACTIVATION_BY_SARSCOV2	Extrafollicular And Follicular B Cell Activation By Sarscov2	30	0.3519	1.1314	0.270633	0.530425	1	1376	tags=23%, list=9%, signal=26%
WikiPathways	WP_PYRIMIDINE_METABOLISM	Pyrimidine Metabolism	73	0.2987	1.1309	0.242424	0.528063	1	2121	tags=23%, list=14%, signal=27%
WikiPathways	WP_SUDDEN_INFANT_DEATH_SYNDROME_SIDS_SUSCEPTIBILITY_PATHWAYS	Sudden Infant Death Syndrome Sids Susceptibility Pathways	87	0.2861	1.1282	0.243144	0.530529	1	1632	tags=21%, list=11%, signal=23%
Reactome	REACTOME_KERATINIZATION	Keratinization	20	0.4052	1.1258	0.309665	0.511617	1	1594	tags=30%, list=11%, signal=34%
WikiPathways	WP_FAS_LIGAND_PATHWAY_AND_STRESS_INDUCTION_OF_HEAT_SHOCK_PROTEINS	Fas Ligand Pathway And Stress Induction Of Heat Shock Proteins	39	0.3316	1.1241	0.284314	0.535841	1	3564	tags=41%, list=24%, signal=54%
Reactome	REACTOME_CELL_JUNCTION_ORGANIZATION	Cell Junction Organization	233	0.2438	1.1226	0.196694	0.517339	1	2265	tags=20%, list=15%, signal=23%
Reactome	REACTOME_DNA_REPAIR	Dna Repair	303	0.2399	1.1211	0.194399	0.519156	1	3837	tags=29%, list=26%, signal=39%
Reactome	REACTOME_CARGO_CONCENTRATION_IN_THE_ER	Cargo Concentration In The Er	24	0.3709	1.1193	0.321357	0.521251	1	3246	tags=38%, list=22%, signal=48%
WikiPathways	WP_13Q1212_COPY_NUMBER_VARIATION	13Q1212 Copy Number Variation	27	0.3654	1.1183	0.304348	0.545527	1	1652	tags=22%, list=11%, signal=25%
WikiPathways	WP_NETRINUNC5B_SIGNALING	Netrinunc5B Signaling	36	0.3445	1.1181	0.293458	0.542308	1	1966	tags=22%, list=13%, signal=26%
Reactome	REACTOME_TRANSLESION_SYNTHESIS_BY_POLK	Translesion Synthesis By Polk	17	0.4047	1.1179	0.322245	0.522624	1	3616	tags=47%, list=25%, signal=62%
Reactome	REACTOME_NPAS4_REGULATES_EXPRESSION_OF_TARGET_GENES	Npas4 Regulates Expression Of Target Genes	15	0.4212	1.1171	0.331313	0.522848	1	998	tags=20%, list=7%, signal=21%
Reactome	REACTOME_SYNTHESIS_OF_PC	Synthesis Of Pc	22	0.376	1.1161	0.292683	0.523412	1	2145	tags=32%, list=15%, signal=37%
WikiPathways	WP_PROSTAGLANDIN_AND_LEUKOTRIENE_METABOLISM_IN_SENESCENCE	Prostaglandin And Leukotriene Metabolism In Senescence	20	0.3797	1.1157	0.3083	0.544055	1	2962	tags=40%, list=20%, signal=50%
Reactome	REACTOME_CYTOPROTECTION_BY_HMOX1	Cytoprotection By Hmox1	41	0.3175	1.1149	0.282353	0.524674	1	2825	tags=22%, list=19%, signal=27%
WikiPathways	WP_MIRTARGETED_GENES_IN_SQUAMOUS_CELL	Mirtargeted Genes In Squamous Cell	115	0.2679	1.1113	0.260474	0.550153	1	3114	tags=28%, list=21%, signal=35%
Reactome	REACTOME_STING_MEDIATED_INDUCTION_OF_HOST_IMMUNE_RESPONSES	Sting Mediated Induction Of Host Immune Responses	15	0.4136	1.1092	0.341748	0.536674	1	1739	tags=27%, list=12%, signal=30%
Reactome	REACTOME_ATTACHMENT_AND_ENTRY	Attachment And Entry	15	0.4125	1.1092	0.319688	0.534918	1	2187	tags=33%, list=15%, signal=39%
Reactome	REACTOME_DNA_STRAND_ELONGATION	Dna Strand Elongation	32	0.342	1.108	0.311069	0.536131	1	2724	tags=41%, list=18%, signal=50%
Reactome	REACTOME_TRANSCRIPTIONAL_REGULATION_BY_RUNX1	Transcriptional Regulation By Runx1	175	0.2515	1.1079	0.230503	0.534568	1	1811	tags=18%, list=12%, signal=21%
WikiPathways	WP_DRAVET_SYNDROME	Dravet Syndrome	21	0.3843	1.1065	0.327715	0.557686	1	1246	tags=19%, list=8%, signal=21%
Reactome	REACTOME_SENSORY_PERCEPTION	Sensory Perception	102	0.2733	1.1052	0.250447	0.538953	1	2984	tags=28%, list=20%, signal=35%
Reactome	REACTOME_APC_CDC20_MEDIATED_DEGRADATION_OF_NEK2A	Apc Cdc20 Mediated Degradation Of Nek2A	26	0.3514	1.1051	0.330629	0.537396	1	3785	tags=35%, list=26%, signal=46%
Reactome	REACTOME_REGULATION_OF_HOMOTYPIC_CELL_CELL_ADHESION	Regulation Of Homotypic Cell Cell Adhesion	188	0.2501	1.1051	0.250438	0.535663	1	2265	tags=20%, list=15%, signal=24%
WikiPathways	WP_SELENIUM_METABOLISM_AND_SELENOPROTEINS	Selenium Metabolism And Selenoproteins	40	0.317	1.1046	0.302913	0.55801	1	1348	tags=18%, list=9%, signal=19%
Reactome	REACTOME_ENDOGENOUS_STEROLS	Endogenous Sterols	16	0.4106	1.1035	0.319106	0.537577	1	1582	tags=25%, list=11%, signal=28%
WikiPathways	WP_PATHOGENIC_ESCHERICHIA_COLI_INFECTION	Pathogenic Escherichia Coli Infection	44	0.3194	1.1031	0.3	0.557868	1	3305	tags=39%, list=22%, signal=50%
Reactome	REACTOME_TRANSLOCATION_OF_SLC2A4_GLUT4_TO_THE_PLASMA_MEMBRANE	Translocation Of Slc2A4 Glut4 To The Plasma Membrane	59	0.2964	1.1016	0.293403	0.540364	1	3305	tags=27%, list=22%, signal=35%
WikiPathways	WP_MATRIX_METALLOPROTEINASES	Matrix Metalloproteinases	16	0.4098	1.1014	0.338174	0.557745	1	452	tags=19%, list=3%, signal=19%
WikiPathways	WP_ARYL_HYDROCARBON_RECEPTOR_PATHWAY_WP2586	Aryl Hydrocarbon Receptor Pathway Wp2586	37	0.3254	1.1008	0.321881	0.555317	1	1966	tags=24%, list=13%, signal=28%
Hallmarks	HALLMARK_OXIDATIVE_PHOSPHORYLATION	Oxidative Phosphorylation	196	0.2468	1.0992	0.237374	0.35572	1	4458	tags=37%, list=30%, signal=53%
WikiPathways	WP_3Q29_COPY_NUMBER_VARIATION_SYNDROME	3Q29 Copy Number Variation Syndrome	56	0.3046	1.0974	0.316384	0.56005	1	1964	tags=23%, list=13%, signal=27%
Reactome	REACTOME_CLATHRIN_MEDIATED_ENDOCYTOSIS	Clathrin Mediated Endocytosis	116	0.2644	1.0934	0.296959	0.55814	1	416	tags=6%, list=3%, signal=6%
Reactome	REACTOME_GAP_JUNCTION_ASSEMBLY	Gap Junction Assembly	16	0.3979	1.0908	0.356994	0.562572	1	1343	tags=31%, list=9%, signal=34%
Hallmarks	HALLMARK_IL2_STAT5_SIGNALING	Il2 Stat5 Signaling	146	0.2532	1.0876	0.268953	0.364685	1	2618	tags=24%, list=18%, signal=29%
Reactome	REACTOME_SARS_COV_1_HOST_INTERACTIONS	Sars Cov 1 Host Interactions	81	0.2763	1.087	0.3	0.570127	1	2159	tags=19%, list=15%, signal=22%
WikiPathways	WP_FLUOROPYRIMIDINE_ACTIVITY	Fluoropyrimidine Activity	26	0.3474	1.0869	0.32282	0.580601	1	1809	tags=23%, list=12%, signal=26%
WikiPathways	WP_FOCAL_ADHESION_PI3KAKTMTORSIGNALING	Focal Adhesion Pi3Kaktmtorsignaling	208	0.241	1.0847	0.282095	0.581787	1	1230	tags=13%, list=8%, signal=14%
Reactome	REACTOME_INTRACELLULAR_SIGNALING_BY_SECOND_MESSENGERS	Intracellular Signaling By Second Messengers	239	0.2354	1.0836	0.262609	0.576377	1	1552	tags=15%, list=11%, signal=17%
WikiPathways	WP_SPHINGOLIPID_METABOLISM_IN_SENESCENCE	Sphingolipid Metabolism In Senescence	24	0.3515	1.0827	0.359465	0.582872	1	3014	tags=33%, list=20%, signal=42%
Reactome	REACTOME_NS1_MEDIATED_EFFECTS_ON_HOST_PATHWAYS	Ns1 Mediated Effects On Host Pathways	41	0.3191	1.0826	0.320312	0.577121	1	2166	tags=22%, list=15%, signal=26%
Reactome	REACTOME_NEGATIVE_REGULATION_OF_THE_PI3K_AKT_NETWORK	Negative Regulation Of The Pi3K Akt Network	77	0.2785	1.0814	0.304104	0.578398	1	594	tags=12%, list=4%, signal=12%
Reactome	REACTOME_RECRUITMENT_OF_MITOTIC_CENTROSOME_PROTEINS_AND_COMPLEXES	Recruitment Of Mitotic Centrosome Proteins And Complexes	75	0.283	1.0804	0.314019	0.578921	1	4087	tags=43%, list=28%, signal=59%
Reactome	REACTOME_REGULATION_OF_INSULIN_LIKE_GROWTH_FACTOR_IGF_TRANSPORT_AND_UPTAKE_BY_INSULIN_LIKE_GROWTH_FACTOR_BINDING_PROTEINS_IGFBPS	Regulation Of Insulin Like Growth Factor Igf Transport And Uptake By Insulin Like Growth Factor Binding Proteins Igfbps	70	0.2793	1.0772	0.320721	0.585044	1	1228	tags=16%, list=8%, signal=17%
Reactome	REACTOME_REGULATION_OF_NF_KAPPA_B_SIGNALING	Regulation Of Nf Kappa B Signaling	17	0.3962	1.0758	0.365201	0.586733	1	1836	tags=24%, list=12%, signal=27%
Reactome	REACTOME_DOWNREGULATION_OF_SMAD2_3_SMAD4_TRANSCRIPTIONAL_ACTIVITY	Downregulation Of Smad2 3 Smad4 Transcriptional Activity	30	0.3394	1.0738	0.338	0.589835	1	596	tags=10%, list=4%, signal=10%
Reactome	REACTOME_THROMBIN_SIGNALLING_THROUGH_PROTEINASE_ACTIVATED_RECEPTORS_PARS	Thrombin Signalling Through Proteinase Activated Receptors Pars	21	0.3659	1.0731	0.368726	0.589907	1	1566	tags=14%, list=11%, signal=16%
WikiPathways	WP_ELECTRON_TRANSPORT_CHAIN_OXPHOS_SYSTEM_IN_MITOCHONDRIA	Electron Transport Chain Oxphos System In Mitochondria	83	0.272	1.0728	0.320896	0.602369	1	4458	tags=42%, list=30%, signal=60%
WikiPathways	WP_NRP1TRIGGERED_SIGNALING_IN_PANCREATIC_CANCER	Nrp1Triggered Signaling In Pancreatic Cancer	44	0.3092	1.0721	0.34357	0.600118	1	960	tags=14%, list=7%, signal=15%
Reactome	REACTOME_NEGATIVE_REGULATION_OF_FGFR1_SIGNALING	Negative Regulation Of Fgfr1 Signaling	20	0.3673	1.0667	0.358	0.604107	1	1811	tags=20%, list=12%, signal=23%
Reactome	REACTOME_ACTIVATION_OF_ATR_IN_RESPONSE_TO_REPLICATION_STRESS	Activation Of Atr In Response To Replication Stress	35	0.3223	1.0648	0.346939	0.606775	1	2974	tags=40%, list=20%, signal=50%
WikiPathways	WP_TYROBP_CAUSAL_NETWORK_IN_MICROGLIA	Tyrobp Causal Network In Microglia	32	0.3273	1.0624	0.351779	0.619572	1	445	tags=13%, list=3%, signal=13%
Reactome	REACTOME_TRANSCRIPTIONAL_AND_POST_TRANSLATIONAL_REGULATION_OF_MITF_M_EXPRESSION_AND_ACTIVITY	Transcriptional And Post Translational Regulation Of Mitf M Expression And Activity	48	0.3039	1.0597	0.342912	0.617397	1	1632	tags=21%, list=11%, signal=23%
Reactome	REACTOME_NUCLEOTIDE_SALVAGE	Nucleotide Salvage	19	0.369	1.0578	0.376923	0.620273	1	1864	tags=21%, list=13%, signal=24%
Reactome	REACTOME_MUSCLE_CONTRACTION	Muscle Contraction	97	0.2592	1.0576	0.340265	0.618883	1	1494	tags=18%, list=10%, signal=19%
Reactome	REACTOME_ORGANELLE_BIOGENESIS_AND_MAINTENANCE	Organelle Biogenesis And Maintenance	261	0.2285	1.0559	0.30648	0.621251	1	3987	tags=34%, list=27%, signal=46%
Reactome	REACTOME_L1CAM_INTERACTIONS	L1Cam Interactions	87	0.2656	1.0557	0.339731	0.619758	1	1384	tags=14%, list=9%, signal=15%
WikiPathways	WP_KCNQ2_AND_KCNQ3RELATED_EPILEPSY	Kcnq2 And Kcnq3Related Epilepsy	25	0.3412	1.053	0.396887	0.638141	1	2353	tags=24%, list=16%, signal=29%
Reactome	REACTOME_TOLL_LIKE_RECEPTOR_9_TLR9_CASCADE	Toll Like Receptor 9 Tlr9 Cascade	95	0.2604	1.0529	0.345259	0.624868	1	1966	tags=18%, list=13%, signal=21%
Reactome	REACTOME_TOLL_LIKE_RECEPTOR_TLR1_TLR2_CASCADE	Toll Like Receptor Tlr1 Tlr2 Cascade	97	0.2621	1.0521	0.336957	0.624964	1	1966	tags=19%, list=13%, signal=21%
Reactome	REACTOME_RESPONSE_OF_EIF2AK4_GCN2_TO_AMINO_ACID_DEFICIENCY	Response Of Eif2Ak4 Gcn2 To Amino Acid Deficiency	93	0.2647	1.052	0.352837	0.623525	1	4192	tags=33%, list=28%, signal=46%
Reactome	REACTOME_THE_ROLE_OF_NEF_IN_HIV_1_REPLICATION_AND_DISEASE_PATHOGENESIS	The Role Of Nef In Hiv 1 Replication And Disease Pathogenesis	20	0.3548	1.0519	0.37732	0.621684	1	1131	tags=10%, list=8%, signal=11%
Reactome	REACTOME_DNA_DOUBLE_STRAND_BREAK_REPAIR	Dna Double Strand Break Repair	152	0.2417	1.0502	0.346499	0.624062	1	3371	tags=26%, list=23%, signal=33%
Reactome	REACTOME_SLC_MEDIATED_TRANSPORT_OF_ORGANIC_ANIONS	Slc Mediated Transport Of Organic Anions	16	0.3824	1.0485	0.406977	0.626661	1	854	tags=13%, list=6%, signal=13%
Reactome	REACTOME_INFECTION_WITH_MYCOBACTERIUM_TUBERCULOSIS	Infection With Mycobacterium Tuberculosis	21	0.3541	1.0485	0.390946	0.624789	1	3316	tags=33%, list=22%, signal=43%
WikiPathways	WP_METABOLIC_REPROGRAMMING_IN_COLON_CANCER	Metabolic Reprogramming In Colon Cancer	40	0.3087	1.0483	0.402597	0.645389	1	1929	tags=20%, list=13%, signal=23%
Reactome	REACTOME_ESTROGEN_DEPENDENT_NUCLEAR_EVENTS_DOWNSTREAM_OF_ESR_MEMBRANE_SIGNALING	Estrogen Dependent Nuclear Events Downstream Of Esr Membrane Signaling	18	0.3725	1.0455	0.394422	0.630145	1	826	tags=11%, list=6%, signal=12%
Reactome	REACTOME_VEGFR2_MEDIATED_CELL_PROLIFERATION	Vegfr2 Mediated Cell Proliferation	18	0.3711	1.0453	0.421907	0.628927	1	960	tags=17%, list=7%, signal=18%
Reactome	REACTOME_GLUCOSE_METABOLISM	Glucose Metabolism	69	0.2786	1.0451	0.396518	0.627364	1	4311	tags=42%, list=29%, signal=59%
WikiPathways	WP_VITAMIN_D_IN_INFLAMMATORY_DISEASES	Vitamin D In Inflammatory Diseases	20	0.3599	1.0441	0.404215	0.651677	1	1610	tags=20%, list=11%, signal=22%
Hallmarks	HALLMARK_KRAS_SIGNALING_DN	Kras Signaling Dn	67	0.2784	1.0428	0.383877	0.447247	1	2129	tags=19%, list=14%, signal=23%
WikiPathways	WP_MIRNA_REGULATION_OF_PROSTATE_CANCER_SIGNALING	Mirna Regulation Of Prostate Cancer Signaling	28	0.3335	1.0401	0.373196	0.657756	1	2097	tags=21%, list=14%, signal=25%
Reactome	REACTOME_RESPIRATORY_SYNCYTIAL_VIRUS_RSV_GENOME_REPLICATION_TRANSCRIPTION_AND_TRANSLATION	Respiratory Syncytial Virus Rsv Genome Replication Transcription And Translation	17	0.3787	1.0389	0.40404	0.641465	1	4301	tags=41%, list=29%, signal=58%
Reactome	REACTOME_FORMATION_OF_INCISION_COMPLEX_IN_GG_NER	Formation Of Incision Complex In Gg Ner	41	0.3062	1.0372	0.389961	0.643743	1	4067	tags=39%, list=28%, signal=54%
WikiPathways	WP_FOCAL_ADHESION	Focal Adhesion	153	0.238	1.0372	0.364621	0.661253	1	960	tags=11%, list=7%, signal=12%
Reactome	REACTOME_RHO_GTPASES_ACTIVATE_FORMINS	Rho Gtpases Activate Formins	125	0.2469	1.0366	0.365724	0.643174	1	3566	tags=34%, list=24%, signal=44%
Reactome	REACTOME_DNA_DAMAGE_RECOGNITION_IN_GG_NER	Dna Damage Recognition In Gg Ner	36	0.3059	1.0354	0.40566	0.644479	1	3596	tags=33%, list=24%, signal=44%
WikiPathways	WP_IRONSULFUR_CLUSTER_BIOGENESIS	Ironsulfur Cluster Biogenesis	15	0.382	1.0338	0.399594	0.665049	1	4959	tags=53%, list=34%, signal=80%
Reactome	REACTOME_CELL_SURFACE_INTERACTIONS_AT_THE_VASCULAR_WALL	Cell Surface Interactions At The Vascular Wall	71	0.2709	1.0326	0.418018	0.649718	1	1448	tags=18%, list=10%, signal=20%
Reactome	REACTOME_CELLULAR_RESPONSE_TO_HEAT_STRESS	Cellular Response To Heat Stress	90	0.2593	1.0309	0.418728	0.651909	1	4373	tags=43%, list=30%, signal=61%
Reactome	REACTOME_MITOTIC_PROMETAPHASE	Mitotic Prometaphase	186	0.2313	1.0305	0.396161	0.651006	1	2360	tags=23%, list=16%, signal=27%
Reactome	REACTOME_SARS_COV_1_INFECTION	Sars Cov 1 Infection	124	0.2475	1.0291	0.366957	0.652648	1	2159	tags=17%, list=15%, signal=20%
Reactome	REACTOME_CHROMOSOME_MAINTENANCE	Chromosome Maintenance	122	0.2465	1.029	0.395176	0.650961	1	2724	tags=25%, list=18%, signal=31%
Reactome	REACTOME_ADHERENS_JUNCTIONS_INTERACTIONS	Adherens Junctions Interactions	200	0.2303	1.0287	0.389545	0.649809	1	2265	tags=20%, list=15%, signal=23%
Reactome	REACTOME_PEROXISOMAL_PROTEIN_IMPORT	Peroxisomal Protein Import	52	0.2875	1.0286	0.393536	0.648217	1	4415	tags=46%, list=30%, signal=66%
Reactome	REACTOME_HIV_LIFE_CYCLE	Hiv Life Cycle	139	0.2426	1.0286	0.399651	0.646425	1	4328	tags=37%, list=29%, signal=52%
Hallmarks	HALLMARK_SPERMATOGENESIS	Spermatogenesis	68	0.2769	1.027	0.421053	0.466526	1	2415	tags=24%, list=16%, signal=28%
Reactome	REACTOME_INTERFERON_GAMMA_SIGNALING	Interferon Gamma Signaling	56	0.2871	1.0269	0.407678	0.648612	1	2082	tags=21%, list=14%, signal=25%
Reactome	REACTOME_MITOCHONDRIAL_CALCIUM_ION_TRANSPORT	Mitochondrial Calcium Ion Transport	20	0.3496	1.0263	0.396	0.648154	1	1699	tags=25%, list=12%, signal=28%
Reactome	REACTOME_AURKA_ACTIVATION_BY_TPX2	Aurka Activation By Tpx2	66	0.2765	1.0261	0.423077	0.646698	1	2358	tags=27%, list=16%, signal=32%
Reactome	REACTOME_DARPP_32_EVENTS	Darpp 32 Events	21	0.3485	1.0256	0.415058	0.646236	1	1496	tags=19%, list=10%, signal=21%
WikiPathways	WP_SMALL_CELL_LUNG_CANCER	Small Cell Lung Cancer	82	0.2614	1.0242	0.410256	0.684099	1	1459	tags=16%, list=10%, signal=17%
WikiPathways	WP_CAFFEINE_IN_BLOOD_VESSELS	Caffeine In Blood Vessels	21	0.3431	1.0237	0.41498	0.681279	1	1141	tags=24%, list=8%, signal=26%
Reactome	REACTOME_ASPARAGINE_N_LINKED_GLYCOSYLATION	Asparagine N Linked Glycosylation	264	0.2212	1.0228	0.38342	0.651459	1	3340	tags=27%, list=23%, signal=34%
WikiPathways	WP_FOLLICLE_STIMULATING_HORMONE_FSH_SIGNALING	Follicle Stimulating Hormone Fsh Signaling	22	0.3492	1.0225	0.417939	0.680104	1	1171	tags=14%, list=8%, signal=15%
Reactome	REACTOME_SARS_COV_2_HOST_INTERACTIONS	Sars Cov 2 Host Interactions	155	0.2357	1.0224	0.409165	0.650525	1	3564	tags=28%, list=24%, signal=36%
WikiPathways	WP_TCELL_RECEPTOR_SIGNALING	Tcell Receptor Signaling	66	0.2704	1.0222	0.421456	0.676921	1	1966	tags=20%, list=13%, signal=23%
Reactome	REACTOME_HSF1_DEPENDENT_TRANSACTIVATION	Hsf1 Dependent Transactivation	29	0.3224	1.022	0.424419	0.649942	1	2371	tags=31%, list=16%, signal=37%
WikiPathways	WP_CORTICOTROPINRELEASING_HORMONE_SIGNALING	Corticotropinreleasing Hormone Signaling	67	0.2714	1.0218	0.412926	0.674012	1	974	tags=12%, list=7%, signal=13%
Reactome	REACTOME_RESOLUTION_OF_SISTER_CHROMATID_COHESION	Resolution Of Sister Chromatid Cohesion	113	0.2436	1.0176	0.426056	0.659272	1	2622	tags=26%, list=18%, signal=31%
Reactome	REACTOME_RECYCLING_PATHWAY_OF_L1	Recycling Pathway Of L1	37	0.3033	1.0161	0.435849	0.661069	1	3383	tags=30%, list=23%, signal=38%
Hallmarks	HALLMARK_FATTY_ACID_METABOLISM	Fatty Acid Metabolism	128	0.2404	1.0139	0.435572	0.47916	1	3401	tags=28%, list=23%, signal=36%
Reactome	REACTOME_HS_GAG_DEGRADATION	Hs Gag Degradation	16	0.3685	1.0122	0.434694	0.669312	1	669	tags=19%, list=5%, signal=20%
WikiPathways	WP_FANCONI_ANEMIA	Fanconi Anemia	45	0.2894	1.0118	0.438306	0.695202	1	4740	tags=47%, list=32%, signal=69%
Reactome	REACTOME_TRNA_PROCESSING	Trna Processing	107	0.2465	1.0099	0.423009	0.672969	1	4274	tags=35%, list=29%, signal=48%
Reactome	REACTOME_SYNTHESIS_OF_ACTIVE_UBIQUITIN_ROLES_OF_E1_AND_E2_ENZYMES	Synthesis Of Active Ubiquitin Roles Of E1 And E2 Enzymes	30	0.318	1.0097	0.447706	0.671574	1	3432	tags=30%, list=23%, signal=39%
WikiPathways	WP_CAMKK2_PATHWAY	Camkk2 Pathway	79	0.2593	1.0064	0.389982	0.704128	1	1404	tags=15%, list=10%, signal=17%
WikiPathways	WP_SYNTHESIS_OF_CERAMIDES_AND_1DEOXYCERAMIDES	Synthesis Of Ceramides And 1Deoxyceramides	19	0.356	1.0063	0.455969	0.700386	1	990	tags=21%, list=7%, signal=23%
Reactome	REACTOME_SIGNALING_BY_ERBB2_IN_CANCER	Signaling By Erbb2 In Cancer	21	0.342	1.0061	0.440404	0.678853	1	487	tags=14%, list=3%, signal=15%
WikiPathways	WP_TARGETING_YAP_IN_PANCREATIC_DUCTAL_ADENOCARCINOMA_PDAC	Targeting Yap In Pancreatic Ductal Adenocarcinoma Pdac	23	0.3358	1.0061	0.443137	0.696865	1	1971	tags=22%, list=13%, signal=25%
Reactome	REACTOME_DISEASES_OF_SIGNAL_TRANSDUCTION_BY_GROWTH_FACTOR_RECEPTORS_AND_SECOND_MESSENGERS	Diseases Of Signal Transduction By Growth Factor Receptors And Second Messengers	375	0.2107	1.0053	0.449664	0.679087	1	1510	tags=14%, list=10%, signal=15%
WikiPathways	WP_MITOCHONDRIAL_FATTY_ACID_OXIDATION_DISORDERS	Mitochondrial Fatty Acid Oxidation Disorders	18	0.3618	1.0027	0.457594	0.701252	1	5607	tags=56%, list=38%, signal=89%
Reactome	REACTOME_SIGNALING_BY_EGFR_IN_CANCER	Signaling By Egfr In Cancer	19	0.3472	0.9994	0.457557	0.692401	1	3316	tags=32%, list=22%, signal=41%
Reactome	REACTOME_RHOBTB2_GTPASE_CYCLE	Rhobtb2 Gtpase Cycle	22	0.3381	0.9976	0.454	0.69503	1	3257	tags=36%, list=22%, signal=47%
WikiPathways	WP_INTERLEUKIN1_IL1_STRUCTURAL_PATHWAY	Interleukin1 Il1 Structural Pathway	47	0.2856	0.9953	0.459108	0.715333	1	914	tags=11%, list=6%, signal=11%
Reactome	REACTOME_TCF_DEPENDENT_SIGNALING_IN_RESPONSE_TO_WNT	Tcf Dependent Signaling In Response To Wnt	176	0.2272	0.9939	0.467241	0.702598	1	2197	tags=19%, list=15%, signal=22%
WikiPathways	WP_TYROSINE_KINASE_INHIBITORS_IN_GLIOBLASTOMA	Tyrosine Kinase Inhibitors In Glioblastoma	20	0.3471	0.9936	0.447525	0.71551	1	1171	tags=15%, list=8%, signal=16%
WikiPathways	WP_REGULATORY_CIRCUITS_OF_STAT3_SIGNALING	Regulatory Circuits Of Stat3 Signaling	50	0.2818	0.9932	0.481409	0.712637	1	1155	tags=12%, list=8%, signal=13%
Reactome	REACTOME_LEISHMANIA_INFECTION	Leishmania Infection	119	0.2384	0.9924	0.454082	0.704677	1	1899	tags=16%, list=13%, signal=18%
Reactome	REACTOME_CELL_CELL_COMMUNICATION	Cell Cell Communication	257	0.2163	0.9914	0.472906	0.705257	1	2127	tags=18%, list=14%, signal=20%
WikiPathways	WP_NEUROGENESIS_REGULATION_IN_THE_OLFACTORY_EPITHELIUM	Neurogenesis Regulation In The Olfactory Epithelium	35	0.2995	0.9889	0.451243	0.718856	1	1225	tags=20%, list=8%, signal=22%
Reactome	REACTOME_TRISTETRAPROLIN_TTP_ZFP36_BINDS_AND_DESTABILIZES_MRNA	Tristetraprolin Ttp Zfp36 Binds And Destabilizes Mrna	17	0.3603	0.9884	0.47379	0.711142	1	2469	tags=24%, list=17%, signal=28%
Reactome	REACTOME_TP53_REGULATES_TRANSCRIPTION_OF_ADDITIONAL_CELL_CYCLE_GENES_WHOSE_EXACT_ROLE_IN_THE_P53_PATHWAY_REMAIN_UNCERTAIN	Tp53 Regulates Transcription Of Additional Cell Cycle Genes Whose Exact Role In The P53 Pathway Remain Uncertain	19	0.3488	0.9882	0.482828	0.709598	1	55	tags=5%, list=0%, signal=5%
WikiPathways	WP_INHIBITORS_OF_METABOLISM_IN_MELANOMA_THERAPY	Inhibitors Of Metabolism In Melanoma Therapy	34	0.2984	0.9878	0.469043	0.717608	1	1966	tags=21%, list=13%, signal=24%
Reactome	REACTOME_SPHINGOLIPID_METABOLISM	Sphingolipid Metabolism	81	0.2488	0.9851	0.494361	0.71575	1	3036	tags=27%, list=21%, signal=34%
Reactome	REACTOME_EXTENSION_OF_TELOMERES	Extension Of Telomeres	46	0.2804	0.9845	0.48659	0.71524	1	2724	tags=30%, list=18%, signal=37%
Reactome	REACTOME_G_ALPHA_Z_SIGNALLING_EVENTS	G Alpha Z Signalling Events	32	0.3033	0.9837	0.479769	0.715381	1	1210	tags=16%, list=8%, signal=17%
Reactome	REACTOME_SNRNP_ASSEMBLY	Snrnp Assembly	52	0.2763	0.9827	0.470037	0.715881	1	2519	tags=23%, list=17%, signal=28%
WikiPathways	WP_TYPE_II_INTERFERON_SIGNALING	Type Ii Interferon Signaling	21	0.3339	0.9825	0.493256	0.726603	1	1169	tags=19%, list=8%, signal=21%
Reactome	REACTOME_DOWNREGULATION_OF_ERBB2_SIGNALING	Downregulation Of Erbb2 Signaling	23	0.3347	0.9813	0.489796	0.717636	1	487	tags=13%, list=3%, signal=13%
Reactome	REACTOME_ANCHORING_OF_THE_BASAL_BODY_TO_THE_PLASMA_MEMBRANE	Anchoring Of The Basal Body To The Plasma Membrane	91	0.249	0.979	0.495274	0.721646	1	2358	tags=21%, list=16%, signal=25%
Reactome	REACTOME_RESPIRATORY_SYNCYTIAL_VIRUS_RSV_ATTACHMENT_AND_ENTRY	Respiratory Syncytial Virus Rsv Attachment And Entry	18	0.3482	0.9783	0.460952	0.721761	1	669	tags=22%, list=5%, signal=23%
Reactome	REACTOME_SHC1_EVENTS_IN_ERBB2_SIGNALING	Shc1 Events In Erbb2 Signaling	17	0.3511	0.9764	0.493097	0.724575	1	487	tags=18%, list=3%, signal=18%
WikiPathways	WP_MELATONIN_METABOLISM_AND_EFFECTS	Melatonin Metabolism And Effects	23	0.3292	0.9763	0.510018	0.738383	1	1233	tags=17%, list=8%, signal=19%
Reactome	REACTOME_SLC_MEDIATED_TRANSPORT_OF_AMINO_ACIDS	Slc Mediated Transport Of Amino Acids	21	0.3336	0.9757	0.490566	0.724526	1	316	tags=14%, list=2%, signal=15%
WikiPathways	WP_VITAMIN_DSENSITIVE_CALCIUM_SIGNALING_IN_DEPRESSION	Vitamin Dsensitive Calcium Signaling In Depression	23	0.3244	0.9729	0.472	0.742293	1	1535	tags=22%, list=10%, signal=24%
Reactome	REACTOME_SPHINGOLIPID_DE_NOVO_BIOSYNTHESIS	Sphingolipid De Novo Biosynthesis	31	0.3027	0.9701	0.491461	0.73671	1	3014	tags=35%, list=20%, signal=44%
WikiPathways	WP_MACROPHAGESTIMULATING_PROTEIN_MSP_SIGNALING	Macrophagestimulating Protein Msp Signaling	88	0.2442	0.9692	0.503571	0.747377	1	960	tags=11%, list=7%, signal=12%
WikiPathways	WP_HEAD_AND_NECK_SQUAMOUS_CELL_CARCINOMA	Head And Neck Squamous Cell Carcinoma	64	0.2593	0.9681	0.51068	0.746345	1	1404	tags=16%, list=10%, signal=17%
Reactome	REACTOME_REGULATION_OF_LIPID_METABOLISM_BY_PPARALPHA	Regulation Of Lipid Metabolism By Pparalpha	100	0.2368	0.9679	0.497391	0.740224	1	1130	tags=13%, list=8%, signal=14%
Reactome	REACTOME_CARGO_RECOGNITION_FOR_CLATHRIN_MEDIATED_ENDOCYTOSIS	Cargo Recognition For Clathrin Mediated Endocytosis	78	0.2502	0.9674	0.516854	0.739509	1	416	tags=5%, list=3%, signal=5%
Hallmarks	HALLMARK_ADIPOGENESIS	Adipogenesis	173	0.2214	0.9673	0.518919	0.564684	1	2841	tags=23%, list=19%, signal=28%
WikiPathways	WP_11P112_COPY_NUMBER_VARIATION_SYNDROME	11P112 Copy Number Variation Syndrome	38	0.2829	0.9672	0.501852	0.744682	1	776	tags=8%, list=5%, signal=8%
Reactome	REACTOME_GLYCEROPHOSPHOLIPID_BIOSYNTHESIS	Glycerophospholipid Biosynthesis	93	0.2433	0.9668	0.516637	0.739223	1	2937	tags=25%, list=20%, signal=31%
Reactome	REACTOME_REPRODUCTION	Reproduction	102	0.2404	0.9665	0.520796	0.737796	1	2655	tags=20%, list=18%, signal=24%
Reactome	REACTOME_PROTEIN_HYDROXYLATION	Protein Hydroxylation	19	0.3369	0.9642	0.503891	0.741528	1	4939	tags=47%, list=33%, signal=71%
WikiPathways	WP_NONALCOHOLIC_FATTY_LIVER_DISEASE	Nonalcoholic Fatty Liver Disease	125	0.2296	0.9635	0.516755	0.74998	1	3875	tags=32%, list=26%, signal=43%
WikiPathways	WP_ANK2_PATHWAY_IN_EPILEPSY_DEVELOPMENT	Ank2 Pathway In Epilepsy Development	18	0.345	0.9609	0.515528	0.752468	1	5	tags=6%, list=0%, signal=6%
WikiPathways	WP_CARDIOMYOCYTE_SIGNALING_CONVERGING_ON_TITIN	Cardiomyocyte Signaling Converging On Titin	22	0.3257	0.9606	0.51497	0.749187	1	983	tags=14%, list=7%, signal=15%
Reactome	REACTOME_EGFR_DOWNREGULATION	Egfr Downregulation	23	0.3128	0.9601	0.512	0.750105	1	1811	tags=17%, list=12%, signal=20%
Reactome	REACTOME_MICRORNA_MIRNA_BIOGENESIS	Microrna Mirna Biogenesis	24	0.3206	0.9599	0.499002	0.748706	1	1841	tags=17%, list=12%, signal=19%
WikiPathways	WP_APOPTOSIS_REGULATION_BY_PARATHYROID_HORMONERELATED_PROTEIN	Apoptosis Regulation By Parathyroid Hormonerelated Protein	19	0.3369	0.9591	0.503984	0.748977	1	1973	tags=32%, list=13%, signal=36%
Reactome	REACTOME_CONSTITUTIVE_SIGNALING_BY_LIGAND_RESPONSIVE_EGFR_CANCER_VARIANTS	Constitutive Signaling By Ligand Responsive Egfr Cancer Variants	17	0.3446	0.959	0.518738	0.749234	1	1916	tags=18%, list=13%, signal=20%
Reactome	REACTOME_REGULATION_OF_HSF1_MEDIATED_HEAT_SHOCK_RESPONSE	Regulation Of Hsf1 Mediated Heat Shock Response	73	0.25	0.9583	0.523466	0.749077	1	3755	tags=36%, list=25%, signal=48%
WikiPathways	WP_AGERAGE_PATHWAY	Agerage Pathway	56	0.2648	0.9578	0.524648	0.748089	1	554	tags=9%, list=4%, signal=9%
WikiPathways	WP_MIRTARGETED_GENES_IN_LYMPHOCYTES	Mirtargeted Genes In Lymphocytes	372	0.2015	0.9573	0.598305	0.74533	1	2876	tags=20%, list=19%, signal=25%
WikiPathways	WP_AGERELATED_MACULAR_DEGENERATION	Agerelated Macular Degeneration	16	0.3521	0.9559	0.517647	0.744867	1	2102	tags=19%, list=14%, signal=22%
Reactome	REACTOME_MITOCHONDRIAL_PROTEIN_IMPORT	Mitochondrial Protein Import	58	0.2617	0.9557	0.542751	0.753631	1	4225	tags=34%, list=29%, signal=48%
Reactome	REACTOME_POSTMITOTIC_NUCLEAR_PORE_COMPLEX_NPC_REFORMATION	Postmitotic Nuclear Pore Complex Npc Reformation	27	0.3094	0.952	0.49904	0.761484	1	2166	tags=22%, list=15%, signal=26%
WikiPathways	WP_RNAPOLYMERASE_II_TRANSCRIPTION_THE_PREINITIATION_COMPLEX	Rnapolymerase Ii Transcription The Preinitiation Complex	66	0.2509	0.9501	0.564685	0.754791	1	3837	tags=33%, list=26%, signal=45%
WikiPathways	WP_APOPTOSISRELATED_NETWORK_DUE_TO_ALTERED_NOTCH3_IN_OVARIAN_CANCER	Apoptosisrelated Network Due To Altered Notch3 In Ovarian Cancer	51	0.2628	0.9489	0.522807	0.753984	1	1522	tags=16%, list=10%, signal=17%
WikiPathways	WP_GLYCOSYLATION_AND_RELATED_CONGENITAL_DEFECTS	Glycosylation And Related Congenital Defects	25	0.3112	0.9488	0.518738	0.750445	1	5134	tags=48%, list=35%, signal=73%
WikiPathways	WP_RESISTIN_AS_A_REGULATOR_OF_INFLAMMATION	Resistin As A Regulator Of Inflammation	27	0.3081	0.9486	0.518797	0.747113	1	419	tags=11%, list=3%, signal=11%
Reactome	REACTOME_GOLGI_TO_ER_RETROGRADE_TRANSPORT	Golgi To Er Retrograde Transport	113	0.2321	0.9479	0.554386	0.769674	1	3918	tags=33%, list=27%, signal=44%
Reactome	REACTOME_ENDOSOMAL_SORTING_COMPLEX_REQUIRED_FOR_TRANSPORT_ESCRT	Endosomal Sorting Complex Required For Transport Escrt	29	0.3061	0.9462	0.528571	0.771955	1	2772	tags=31%, list=19%, signal=38%
Reactome	REACTOME_NUCLEOTIDE_CATABOLISM	Nucleotide Catabolism	25	0.3117	0.9399	0.537879	0.786158	1	2855	tags=36%, list=19%, signal=45%
WikiPathways	WP_RELATIONSHIP_BETWEEN_INFLAMMATION_COX2_AND_EGFR	Relationship Between Inflammation Cox2 And Egfr	18	0.3385	0.939	0.545098	0.765558	1	1280	tags=17%, list=9%, signal=18%
WikiPathways	WP_TCELL_ANTIGEN_RECEPTOR_TCR_PATHWAY_DURING_STAPHYLOCOCCUS_AUREUS_INFECTION	Tcell Antigen Receptor Tcr Pathway During Staphylococcus Aureus Infection	43	0.2728	0.9375	0.553539	0.765304	1	1376	tags=16%, list=9%, signal=18%
Reactome	REACTOME_HEME_SIGNALING	Heme Signaling	39	0.2786	0.937	0.573077	0.79159	1	957	tags=10%, list=6%, signal=11%
Reactome	REACTOME_TRNA_PROCESSING_IN_THE_NUCLEUS	Trna Processing In The Nucleus	56	0.2589	0.9359	0.563492	0.792323	1	4274	tags=39%, list=29%, signal=55%
Reactome	REACTOME_GAP_JUNCTION_TRAFFICKING_AND_REGULATION	Gap Junction Trafficking And Regulation	29	0.2971	0.935	0.535185	0.792574	1	1343	tags=21%, list=9%, signal=23%
WikiPathways	WP_IMATINIB_AND_CHRONIC_MYELOID_LEUKEMIA	Imatinib And Chronic Myeloid Leukemia	18	0.3374	0.934	0.541247	0.76953	1	627	tags=17%, list=4%, signal=17%
Reactome	REACTOME_HCMV_EARLY_EVENTS	Hcmv Early Events	115	0.2258	0.9333	0.583333	0.794978	1	2166	tags=16%, list=15%, signal=18%
Reactome	REACTOME_RHO_GTPASES_ACTIVATE_IQGAPS	Rho Gtpases Activate Iqgaps	23	0.3167	0.9315	0.569498	0.797556	1	1652	tags=22%, list=11%, signal=24%
Reactome	REACTOME_CELLULAR_RESPONSE_TO_STARVATION	Cellular Response To Starvation	141	0.2169	0.9297	0.625668	0.800095	1	3576	tags=27%, list=24%, signal=35%
WikiPathways	WP_HAIR_FOLLICLE_DEVELOPMENT_CYTODIFFERENTIATION_STAGE_3_OF_3	Hair Follicle Development Cytodifferentiation Stage 3 Of 3	44	0.2731	0.9293	0.560078	0.776949	1	967	tags=16%, list=7%, signal=17%
Reactome	REACTOME_INSULIN_RECEPTOR_RECYCLING	Insulin Receptor Recycling	25	0.3019	0.929	0.57	0.799861	1	2481	tags=28%, list=17%, signal=34%
WikiPathways	WP_CILIARY_LANDSCAPE	Ciliary Landscape	197	0.2096	0.929	0.619792	0.773824	1	4274	tags=34%, list=29%, signal=47%
WikiPathways	WP_MITOCHONDRIAL_LONG_CHAIN_FATTY_ACID_BETAOXIDATION	Mitochondrial Long Chain Fatty Acid Betaoxidation	16	0.3424	0.9248	0.561728	0.779326	1	5607	tags=56%, list=38%, signal=91%
WikiPathways	WP_EUKARYOTIC_TRANSCRIPTION_INITIATION	Eukaryotic Transcription Initiation	38	0.277	0.9248	0.572519	0.775566	1	3837	tags=37%, list=26%, signal=50%
WikiPathways	WP_MIRTARGETED_GENES_IN_MUSCLE_CELL	Mirtargeted Genes In Muscle Cell	299	0.1995	0.9246	0.64467	0.772343	1	3014	tags=21%, list=20%, signal=26%
Reactome	REACTOME_METALLOPROTEASE_DUBS	Metalloprotease Dubs	32	0.2865	0.9229	0.547069	0.812861	1	3393	tags=28%, list=23%, signal=36%
Reactome	REACTOME_SMAD2_SMAD3_SMAD4_HETEROTRIMER_REGULATES_TRANSCRIPTION	Smad2 Smad3 Smad4 Heterotrimer Regulates Transcription	35	0.2798	0.9216	0.591912	0.814123	1	938	tags=11%, list=6%, signal=12%
Reactome	REACTOME_PYRUVATE_METABOLISM	Pyruvate Metabolism	42	0.2719	0.9185	0.579336	0.819799	1	2050	tags=17%, list=14%, signal=19%
WikiPathways	WP_IL17_SIGNALING	Il17 Signaling	25	0.2979	0.9175	0.60521	0.785097	1	528	tags=12%, list=4%, signal=12%
Reactome	REACTOME_SIGNALING_BY_FGFR3	Signaling By Fgfr3	29	0.2915	0.912	0.600753	0.834224	1	1811	tags=17%, list=12%, signal=20%
Reactome	REACTOME_DISEASES_OF_PROGRAMMED_CELL_DEATH	Diseases Of Programmed Cell Death	87	0.2297	0.9114	0.625668	0.833443	1	2197	tags=17%, list=15%, signal=20%
Reactome	REACTOME_SYNTHESIS_OF_GLYCOSYLPHOSPHATIDYLINOSITOL_GPI	Synthesis Of Glycosylphosphatidylinositol Gpi	15	0.3442	0.9085	0.576541	0.838806	1	5027	tags=53%, list=34%, signal=81%
Reactome	REACTOME_PROTEIN_METHYLATION	Protein Methylation	17	0.3303	0.9071	0.593449	0.840144	1	2958	tags=35%, list=20%, signal=44%
WikiPathways	WP_PERTURBATIONS_TO_HOSTCELL_AUTOPHAGY_INDUCED_BY_SARSCOV2_PROTEINS	Perturbations To Hostcell Autophagy Induced By Sarscov2 Proteins	43	0.2674	0.906	0.589942	0.807733	1	1965	tags=21%, list=13%, signal=24%
Reactome	REACTOME_NEGATIVE_REGULATION_OF_FGFR4_SIGNALING	Negative Regulation Of Fgfr4 Signaling	21	0.3169	0.905	0.604743	0.843401	1	1811	tags=19%, list=12%, signal=22%
WikiPathways	WP_HOSTPATHOGEN_INTERACTION_OF_HUMAN_CORONAVIRUSES_APOPTOSIS	Hostpathogen Interaction Of Human Coronaviruses Apoptosis	18	0.3206	0.9046	0.58871	0.807069	1	1522	tags=28%, list=10%, signal=31%
Reactome	REACTOME_RESOLUTION_OF_ABASIC_SITES_AP_SITES	Resolution Of Abasic Sites Ap Sites	38	0.2744	0.9042	0.614815	0.843241	1	3828	tags=39%, list=26%, signal=53%
Reactome	REACTOME_RNA_POLYMERASE_I_TRANSCRIPTION_TERMINATION	Rna Polymerase I Transcription Termination	28	0.2877	0.9037	0.594912	0.842462	1	3198	tags=29%, list=22%, signal=36%
Reactome	REACTOME_METABOLISM_OF_CARBOHYDRATES_AND_CARBOHYDRATE_DERIVATIVES	Metabolism Of Carbohydrates And Carbohydrate Derivatives	229	0.1992	0.9036	0.715474	0.840444	1	1840	tags=15%, list=12%, signal=17%
WikiPathways	WP_PARKINSONS_DISEASE_PATHWAY	Parkinsons Disease Pathway	30	0.2817	0.9019	0.583333	0.80917	1	2763	tags=23%, list=19%, signal=29%
Reactome	REACTOME_BUDDING_AND_MATURATION_OF_HIV_VIRION	Budding And Maturation Of Hiv Virion	26	0.2942	0.9007	0.603586	0.845757	1	4328	tags=46%, list=29%, signal=65%
Reactome	REACTOME_SARS_COV_2_INFECTION	Sars Cov 2 Infection	244	0.1958	0.9003	0.761675	0.844638	1	4328	tags=33%, list=29%, signal=46%
Reactome	REACTOME_REGULATION_OF_PYRUVATE_METABOLISM	Regulation Of Pyruvate Metabolism	32	0.2768	0.8991	0.623106	0.845453	1	2050	tags=19%, list=14%, signal=22%
WikiPathways	WP_WHITE_FAT_CELL_DIFFERENTIATION	White Fat Cell Differentiation	24	0.2978	0.8991	0.622047	0.811422	1	1466	tags=25%, list=10%, signal=28%
Reactome	REACTOME_SARS_COV_2_ACTIVATES_MODULATES_INNATE_AND_ADAPTIVE_IMMUNE_RESPONSES	Sars Cov 2 Activates Modulates Innate And Adaptive Immune Responses	90	0.2266	0.8971	0.690778	0.848294	1	4301	tags=34%, list=29%, signal=48%
Hallmarks	HALLMARK_MYC_TARGETS_V1	Myc Targets V1	192	0.2023	0.8969	0.725953	0.719035	1	4315	tags=34%, list=29%, signal=47%
WikiPathways	WP_CONGENITAL_GENERALIZED_LIPODYSTROPHY	Congenital Generalized Lipodystrophy	16	0.3257	0.8967	0.595876	0.813046	1	3875	tags=44%, list=26%, signal=59%
Reactome	REACTOME_NEGATIVE_REGULATION_OF_FGFR2_SIGNALING	Negative Regulation Of Fgfr2 Signaling	21	0.299	0.8953	0.604839	0.850571	1	1811	tags=19%, list=12%, signal=22%
Reactome	REACTOME_COOPERATION_OF_PDCL_PHLP1_AND_TRIC_CCT_IN_G_PROTEIN_BETA_FOLDING	Cooperation Of Pdcl Phlp1 And Tric Cct In G Protein Beta Folding	26	0.2912	0.8953	0.583333	0.848585	1	2984	tags=35%, list=20%, signal=43%
Reactome	REACTOME_TRANSCRIPTIONAL_REGULATION_BY_TP53	Transcriptional Regulation By Tp53	314	0.1903	0.8951	0.792517	0.846954	1	2763	tags=19%, list=19%, signal=23%
Reactome	REACTOME_MITOTIC_SPINDLE_CHECKPOINT	Mitotic Spindle Checkpoint	107	0.2189	0.8907	0.680581	0.855458	1	3566	tags=32%, list=24%, signal=42%
Reactome	REACTOME_ENERGY_DEPENDENT_REGULATION_OF_MTOR_BY_LKB1_AMPK	Energy Dependent Regulation Of Mtor By Lkb1 Ampk	27	0.2855	0.8905	0.632094	0.853874	1	4235	tags=44%, list=29%, signal=62%
WikiPathways	WP_CANONICAL_AND_NONCANONICAL_NOTCH_SIGNALING	Canonical And Noncanonical Notch Signaling	19	0.3084	0.8887	0.602434	0.826935	1	1225	tags=16%, list=8%, signal=17%
Reactome	REACTOME_ANTIGEN_PRESENTATION_FOLDING_ASSEMBLY_AND_PEPTIDE_LOADING_OF_CLASS_I_MHC	Antigen Presentation Folding Assembly And Peptide Loading Of Class I Mhc	21	0.3033	0.8878	0.605263	0.858292	1	4020	tags=38%, list=27%, signal=52%
Reactome	REACTOME_SIGNALING_BY_MET	Signaling By Met	61	0.2385	0.8874	0.670433	0.856938	1	632	tags=8%, list=4%, signal=9%
WikiPathways	WP_FATTY_ACID_BETAOXIDATION	Fatty Acid Betaoxidation	27	0.2836	0.8872	0.594758	0.826344	1	4186	tags=33%, list=28%, signal=46%
WikiPathways	WP_INFLUENCE_OF_LAMINOPATHIES_ON_WNT_SIGNALING	Influence Of Laminopathies On Wnt Signaling	27	0.2805	0.887	0.626984	0.82288	1	826	tags=11%, list=6%, signal=12%
WikiPathways	WP_VEGFAVEGFR2_SIGNALING	Vegfavegfr2 Signaling	374	0.1863	0.8848	0.812292	0.823881	1	1966	tags=15%, list=13%, signal=17%
WikiPathways	WP_GLYCOSPHINGOLIPID_METABOLISM	Glycosphingolipid Metabolism	17	0.3207	0.8847	0.610266	0.820346	1	228	tags=12%, list=2%, signal=12%
Reactome	REACTOME_SARS_COV_INFECTIONS	Sars Cov Infections	335	0.1865	0.8832	0.818336	0.864775	1	2925	tags=20%, list=20%, signal=25%
WikiPathways	WP_NANOPARTICLE_TRIGGERED_AUTOPHAGIC_CELL_DEATH	Nanoparticle Triggered Autophagic Cell Death	20	0.3058	0.8801	0.654321	0.826484	1	1587	tags=20%, list=11%, signal=22%
Reactome	REACTOME_OVARIAN_TUMOR_DOMAIN_PROTEASES	Ovarian Tumor Domain Proteases	31	0.2714	0.879	0.649805	0.872692	1	3564	tags=29%, list=24%, signal=38%
Reactome	REACTOME_TRNA_MODIFICATION_IN_THE_NUCLEUS_AND_CYTOSOL	Trna Modification In The Nucleus And Cytosol	42	0.2543	0.8775	0.659091	0.873986	1	3023	tags=24%, list=20%, signal=30%
WikiPathways	WP_GLYCOGEN_SYNTHESIS_AND_DEGRADATION	Glycogen Synthesis And Degradation	35	0.2624	0.8753	0.657692	0.832737	1	1496	tags=14%, list=10%, signal=16%
Reactome	REACTOME_INTRINSIC_PATHWAY_FOR_APOPTOSIS	Intrinsic Pathway For Apoptosis	48	0.2457	0.8739	0.677239	0.880364	1	3508	tags=31%, list=24%, signal=41%
Reactome	REACTOME_G2_M_DNA_DAMAGE_CHECKPOINT	G2 M Dna Damage Checkpoint	81	0.2198	0.868	0.711864	0.892291	1	3688	tags=31%, list=25%, signal=41%
WikiPathways	WP_TP53_NETWORK	Tp53 Network	16	0.3235	0.8678	0.651072	0.845069	1	627	tags=13%, list=4%, signal=13%
Reactome	REACTOME_SRP_DEPENDENT_COTRANSLATIONAL_PROTEIN_TARGETING_TO_MEMBRANE	Srp Dependent Cotranslational Protein Targeting To Membrane	104	0.2123	0.8663	0.762431	0.893997	1	3576	tags=27%, list=24%, signal=35%
Reactome	REACTOME_NOTCH3_ACTIVATION_AND_TRANSMISSION_OF_SIGNAL_TO_THE_NUCLEUS	Notch3 Activation And Transmission Of Signal To The Nucleus	19	0.3037	0.8634	0.668008	0.898385	1	2575	tags=32%, list=17%, signal=38%
WikiPathways	WP_BARDETBIEDL_SYNDROME	Bardetbiedl Syndrome	77	0.2197	0.8612	0.756806	0.855045	1	2517	tags=23%, list=17%, signal=28%
Reactome	REACTOME_TP53_REGULATES_TRANSCRIPTION_OF_DNA_REPAIR_GENES	Tp53 Regulates Transcription Of Dna Repair Genes	57	0.2354	0.8606	0.717803	0.902858	1	3975	tags=32%, list=27%, signal=43%
Reactome	REACTOME_RESPONSE_OF_MTB_TO_PHAGOCYTOSIS	Response Of Mtb To Phagocytosis	19	0.303	0.8599	0.659044	0.902349	1	3316	tags=32%, list=22%, signal=41%
WikiPathways	WP_7OXOC_AND_7BETAHC_PATHWAYS	7Oxoc And 7Betahc Pathways	18	0.3104	0.8568	0.656311	0.860344	1	4051	tags=44%, list=27%, signal=61%
WikiPathways	WP_16P122_COPY_NUMBER_VARIATION_SYNDROME_520KB	16P122 Copy Number Variation Syndrome 520Kb	47	0.2457	0.8566	0.716243	0.856955	1	3822	tags=30%, list=26%, signal=40%
Reactome	REACTOME_HCMV_INFECTION	Hcmv Infection	137	0.2011	0.8525	0.809932	0.916714	1	2252	tags=15%, list=15%, signal=18%
Reactome	REACTOME_PROCESSING_OF_DNA_DOUBLE_STRAND_BREAK_ENDS	Processing Of Dna Double Strand Break Ends	84	0.2182	0.8511	0.736739	0.917588	1	3688	tags=30%, list=25%, signal=39%
WikiPathways	WP_17Q12_COPY_NUMBER_VARIATION_SYNDROME	17Q12 Copy Number Variation Syndrome	30	0.263	0.8484	0.699219	0.869602	1	3562	tags=30%, list=24%, signal=39%
WikiPathways	WP_GLYCEROPHOSPHOLIPID_BIOSYNTHETIC_PATHWAY	Glycerophospholipid Biosynthetic Pathway	27	0.2697	0.8471	0.702703	0.868387	1	3120	tags=33%, list=21%, signal=42%
Reactome	REACTOME_CHAPERONE_MEDIATED_AUTOPHAGY	Chaperone Mediated Autophagy	17	0.3057	0.8459	0.664706	0.926866	1	4335	tags=59%, list=29%, signal=83%
Reactome	REACTOME_COPII_MEDIATED_VESICLE_TRANSPORT	Copii Mediated Vesicle Transport	58	0.2322	0.8456	0.757974	0.925244	1	3314	tags=29%, list=22%, signal=38%
Reactome	REACTOME_REGULATION_OF_MITF_M_DEPENDENT_GENES_INVOLVED_IN_LYSOSOME_BIOGENESIS_AND_AUTOPHAGY	Regulation Of Mitf M Dependent Genes Involved In Lysosome Biogenesis And Autophagy	17	0.3061	0.8454	0.656015	0.923698	1	2481	tags=29%, list=17%, signal=35%
WikiPathways	WP_RENINANGIOTENSINALDOSTERONE_SYSTEM_RAAS	Reninangiotensinaldosterone System Raas	24	0.2791	0.8451	0.667961	0.868758	1	1281	tags=17%, list=9%, signal=18%
WikiPathways	WP_SPHINGOLIPID_PATHWAY	Sphingolipid Pathway	25	0.2705	0.8437	0.697154	0.867643	1	3014	tags=36%, list=20%, signal=45%
Reactome	REACTOME_TRANSFERRIN_ENDOCYTOSIS_AND_RECYCLING	Transferrin Endocytosis And Recycling	25	0.2756	0.8424	0.694332	0.927642	1	2481	tags=28%, list=17%, signal=34%
Reactome	REACTOME_DENGUE_VIRUS_GENOME_TRANSLATION_AND_REPLICATION	Dengue Virus Genome Translation And Replication	76	0.2206	0.8407	0.74812	0.929282	1	4166	tags=37%, list=28%, signal=51%
WikiPathways	WP_OXIDATIVE_PHOSPHORYLATION	Oxidative Phosphorylation	47	0.2399	0.8383	0.732824	0.874795	1	4238	tags=36%, list=29%, signal=51%
WikiPathways	WP_DYRK1A_INVOLVEMENT_REGARDING_CELL_PROLIFERATION_IN_BRAIN_DEVELOPMENT	Dyrk1A Involvement Regarding Cell Proliferation In Brain Development	54	0.2291	0.8361	0.761639	0.875072	1	1459	tags=13%, list=10%, signal=14%
WikiPathways	WP_MFAP5_EFFECT_ON_PERMEABILITY_AND_MOTILITY_OF_ENDOTHELIAL_CELLS_VIA_CYTOSKELETON_REARRANGEMENT	Mfap5 Effect On Permeability And Motility Of Endothelial Cells Via Cytoskeleton Rearrangement	15	0.3088	0.8347	0.678227	0.874169	1	2720	tags=27%, list=18%, signal=33%
WikiPathways	WP_INTRACELLULAR_TRAFFICKING_PROTEINS_INVOLVED_IN_CMT_NEUROPATHY	Intracellular Trafficking Proteins Involved In Cmt Neuropathy	22	0.2878	0.8337	0.692615	0.872305	1	505	tags=9%, list=3%, signal=9%
Reactome	REACTOME_INTRA_GOLGI_AND_RETROGRADE_GOLGI_TO_ER_TRAFFIC	Intra Golgi And Retrograde Golgi To Er Traffic	178	0.1874	0.8302	0.859619	0.948823	1	3918	tags=28%, list=27%, signal=37%
WikiPathways	WP_NOCGMPPKG_MEDIATED_NEUROPROTECTION	Nocgmppkg Mediated Neuroprotection	19	0.2934	0.8295	0.6893	0.876699	1	1281	tags=16%, list=9%, signal=17%
WikiPathways	WP_SMITHMAGENIS_AND_POTOCKILUPSKI_SYNDROME_COPY_NUMBER_VARIATION	Smithmagenis And Potockilupski Syndrome Copy Number Variation	130	0.1954	0.8272	0.842105	0.877088	1	2565	tags=19%, list=17%, signal=23%
Reactome	REACTOME_NEGATIVE_REGULATION_OF_MAPK_PATHWAY	Negative Regulation Of Mapk Pathway	41	0.242	0.8244	0.741748	0.958531	1	3316	tags=22%, list=22%, signal=28%
WikiPathways	WP_AUTOPHAGY_IN_PANCREATIC_DUCTAL_ADENOCARCINOMA	Autophagy In Pancreatic Ductal Adenocarcinoma	17	0.2893	0.8233	0.69379	0.880667	1	1886	tags=18%, list=13%, signal=20%
Reactome	REACTOME_INFLUENZA_INFECTION	Influenza Infection	146	0.1925	0.8232	0.869176	0.958595	1	4192	tags=31%, list=28%, signal=43%
Reactome	REACTOME_E3_UBIQUITIN_LIGASES_UBIQUITINATE_TARGET_PROTEINS	E3 Ubiquitin Ligases Ubiquitinate Target Proteins	55	0.225	0.8198	0.794231	0.96326	1	4290	tags=38%, list=29%, signal=54%
WikiPathways	WP_HINT1_PATHWAY	Hint1 Pathway	22	0.2747	0.8166	0.708911	0.889312	1	1602	tags=18%, list=11%, signal=20%
Reactome	REACTOME_SARS_COV_1_ACTIVATES_MODULATES_INNATE_IMMUNE_RESPONSES	Sars Cov 1 Activates Modulates Innate Immune Responses	33	0.2489	0.8161	0.734082	0.968136	1	1811	tags=18%, list=12%, signal=21%
Reactome	REACTOME_ATTENUATION_PHASE	Attenuation Phase	21	0.2788	0.8146	0.736449	0.968936	1	4373	tags=57%, list=30%, signal=81%
WikiPathways	WP_PDGF_PATHWAY	Pdgf Pathway	36	0.2446	0.8093	0.768293	0.898628	1	3497	tags=28%, list=24%, signal=36%
Reactome	REACTOME_GLUCONEOGENESIS	Gluconeogenesis	17	0.2912	0.8087	0.744639	0.978373	1	1840	tags=24%, list=12%, signal=27%
Reactome	REACTOME_DENGUE_VIRUS_INFECTION	Dengue Virus Infection	353	0.1694	0.8084	0.956449	0.976605	1	2324	tags=13%, list=16%, signal=15%
WikiPathways	WP_BASE_EXCISION_REPAIR	Base Excision Repair	31	0.2503	0.8053	0.784351	0.901897	1	3828	tags=39%, list=26%, signal=52%
Reactome	REACTOME_DEPOSITION_OF_NEW_CENPA_CONTAINING_NUCLEOSOMES_AT_THE_CENTROMERE	Deposition Of New Cenpa Containing Nucleosomes At The Centromere	61	0.2159	0.8018	0.827206	0.98653	1	1698	tags=16%, list=12%, signal=18%
WikiPathways	WP_GLYCEROL_METABOLISM_INCLUDING_LINKED_IMDS	Glycerol Metabolism Including Linked Imds	19	0.2855	0.7983	0.74364	0.910559	1	3601	tags=42%, list=24%, signal=56%
Reactome	REACTOME_PROTEIN_UBIQUITINATION	Protein Ubiquitination	75	0.2034	0.7971	0.85118	0.99283	1	3741	tags=29%, list=25%, signal=39%
WikiPathways	WP_SLC25A46_PATHWAY	Slc25A46 Pathway	20	0.2726	0.7968	0.763462	0.909136	1	5047	tags=50%, list=34%, signal=76%
Reactome	REACTOME_SPRY_REGULATION_OF_FGF_SIGNALING	Spry Regulation Of Fgf Signaling	16	0.2932	0.7944	0.751064	0.995307	1	1811	tags=19%, list=12%, signal=21%
Reactome	REACTOME_ISG15_ANTIVIRAL_MECHANISM	Isg15 Antiviral Mechanism	68	0.2069	0.7921	0.830054	0.997236	1	4274	tags=34%, list=29%, signal=47%
WikiPathways	WP_LEUKOCYTEINTRINSIC_HIPPO_PATHWAY_FUNCTIONS	Leukocyteintrinsic Hippo Pathway Functions	28	0.251	0.7918	0.773256	0.913734	1	2263	tags=21%, list=15%, signal=25%
Reactome	REACTOME_HEPARAN_SULFATE_HEPARIN_HS_GAG_METABOLISM	Heparan Sulfate Heparin Hs Gag Metabolism	28	0.2509	0.7912	0.78424	0.996608	1	669	tags=11%, list=5%, signal=11%
WikiPathways	WP_AMINO_ACID_METABOLISM	Amino Acid Metabolism	67	0.2126	0.7904	0.825095	0.91236	1	1651	tags=12%, list=11%, signal=13%
WikiPathways	WP_SPHINGOLIPID_METABOLISM_INTEGRATED_PATHWAY	Sphingolipid Metabolism Integrated Pathway	23	0.262	0.7896	0.782	0.909921	1	3014	tags=35%, list=20%, signal=44%
Reactome	REACTOME_TRP_CHANNELS	Trp Channels	17	0.2854	0.7865	0.762781	1	1	1749	tags=18%, list=12%, signal=20%
Reactome	REACTOME_RNA_POLYMERASE_III_TRANSCRIPTION_INITIATION_FROM_TYPE_3_PROMOTER	Rna Polymerase Iii Transcription Initiation From Type 3 Promoter	27	0.2534	0.7858	0.756286	1	1	3420	tags=30%, list=23%, signal=38%
Reactome	REACTOME_GOLGI_ASSOCIATED_VESICLE_BIOGENESIS	Golgi Associated Vesicle Biogenesis	54	0.2153	0.7853	0.823322	1	1	176	tags=4%, list=1%, signal=4%
Reactome	REACTOME_EPHB_MEDIATED_FORWARD_SIGNALING	Ephb Mediated Forward Signaling	38	0.2318	0.7853	0.812261	0.997794	1	2552	tags=24%, list=17%, signal=29%
Reactome	REACTOME_RNA_POLYMERASE_III_CHAIN_ELONGATION	Rna Polymerase Iii Chain Elongation	18	0.28	0.7819	0.743346	1	1	2692	tags=22%, list=18%, signal=27%
WikiPathways	WP_EXERCISEINDUCED_CIRCADIAN_REGULATION	Exerciseinduced Circadian Regulation	41	0.2285	0.7807	0.813433	0.920282	1	4067	tags=39%, list=28%, signal=54%
Reactome	REACTOME_CRISTAE_FORMATION	Cristae Formation	31	0.24	0.7783	0.798839	1	1	4238	tags=42%, list=29%, signal=59%
Reactome	REACTOME_INTERACTIONS_OF_VPR_WITH_HOST_CELLULAR_PROTEINS	Interactions Of Vpr With Host Cellular Proteins	36	0.2388	0.7762	0.804124	1	1	4274	tags=39%, list=29%, signal=55%
Reactome	REACTOME_G_ALPHA_S_SIGNALLING_EVENTS	G Alpha S Signalling Events	58	0.2099	0.7757	0.862524	1	1	1210	tags=10%, list=8%, signal=11%
Reactome	REACTOME_PIWI_INTERACTING_RNA_PIRNA_BIOGENESIS	Piwi Interacting Rna Pirna Biogenesis	17	0.282	0.7755	0.771825	1	1	1916	tags=18%, list=13%, signal=20%
Hallmarks	HALLMARK_APICAL_SURFACE	Apical Surface	27	0.2505	0.775	0.799629	0.931729	1	1723	tags=22%, list=12%, signal=25%
Reactome	REACTOME_RAS_PROCESSING	Ras Processing	20	0.2689	0.7729	0.760331	1	1	5053	tags=50%, list=34%, signal=76%
WikiPathways	WP_CILIOPATHIES	Ciliopathies	143	0.1792	0.772	0.928699	0.929628	1	3711	tags=30%, list=25%, signal=40%
Reactome	REACTOME_ACTIVATED_NOTCH1_TRANSMITS_SIGNAL_TO_THE_NUCLEUS	Activated Notch1 Transmits Signal To The Nucleus	24	0.2598	0.7711	0.801147	1	1	786	tags=13%, list=5%, signal=13%
Reactome	REACTOME_SENESCENCE_ASSOCIATED_SECRETORY_PHENOTYPE_SASP	Senescence Associated Secretory Phenotype Sasp	93	0.1928	0.7692	0.907579	1	1	2197	tags=12%, list=15%, signal=14%
Reactome	REACTOME_SUMOYLATION_OF_DNA_DAMAGE_RESPONSE_AND_REPAIR_PROTEINS	Sumoylation Of Dna Damage Response And Repair Proteins	73	0.1996	0.7689	0.889908	1	1	4127	tags=33%, list=28%, signal=45%
WikiPathways	WP_UNFOLDED_PROTEIN_RESPONSE	Unfolded Protein Response	23	0.2588	0.7675	0.798479	0.932548	1	450	tags=9%, list=3%, signal=9%
Reactome	REACTOME_SUMOYLATION_OF_SUMOYLATION_PROTEINS	Sumoylation Of Sumoylation Proteins	35	0.2309	0.7637	0.824351	1	1	4274	tags=40%, list=29%, signal=56%
WikiPathways	WP_NF1_COPY_NUMBER_VARIATION_SYNDROME	Nf1 Copy Number Variation Syndrome	87	0.1925	0.7626	0.925856	0.935585	1	2944	tags=22%, list=20%, signal=27%
WikiPathways	WP_DNA_DAMAGE_RESPONSE	Dna Damage Response	60	0.2065	0.762	0.856061	0.932546	1	2957	tags=23%, list=20%, signal=29%
Reactome	REACTOME_MITOCHONDRIAL_FATTY_ACID_BETA_OXIDATION	Mitochondrial Fatty Acid Beta Oxidation	32	0.2317	0.7613	0.814953	1	1	1569	tags=13%, list=11%, signal=14%
Reactome	REACTOME_SIGNALING_BY_FGFR2_IIIA_TM	Signaling By Fgfr2 Iiia Tm	19	0.2678	0.7612	0.838403	1	1	1841	tags=16%, list=12%, signal=18%
Reactome	REACTOME_APC_C_CDC20_MEDIATED_DEGRADATION_OF_CYCLIN_B	Apc C Cdc20 Mediated Degradation Of Cyclin B	24	0.2515	0.7595	0.785855	1	1	3785	tags=33%, list=26%, signal=45%
Reactome	REACTOME_GAMMA_CARBOXYLATION_HYPUSINYLATION_HYDROXYLATION_AND_ARYLSULFATASE_ACTIVATION	Gamma Carboxylation Hypusinylation Hydroxylation And Arylsulfatase Activation	50	0.2131	0.7583	0.862888	1	1	3050	tags=22%, list=21%, signal=28%
Reactome	REACTOME_GLYCOGEN_METABOLISM	Glycogen Metabolism	23	0.2533	0.756	0.828516	1	1	1811	tags=13%, list=12%, signal=15%
Hallmarks	HALLMARK_NOTCH_SIGNALING	Notch Signaling	26	0.2475	0.7556	0.837624	0.92759	1	2359	tags=27%, list=16%, signal=32%
Reactome	REACTOME_COMPLEX_III_ASSEMBLY	Complex Iii Assembly	23	0.255	0.7534	0.825243	1	1	3553	tags=30%, list=24%, signal=40%
Reactome	REACTOME_LATE_ENDOSOMAL_MICROAUTOPHAGY	Late Endosomal Microautophagy	28	0.2361	0.7515	0.840741	1	1	2772	tags=32%, list=19%, signal=40%
WikiPathways	WP_MIRNA_REGULATION_OF_DNA_DAMAGE_RESPONSE	Mirna Regulation Of Dna Damage Response	62	0.1997	0.7496	0.889503	0.945808	1	2957	tags=23%, list=20%, signal=28%
Reactome	REACTOME_INFLUENZA_VIRAL_RNA_TRANSCRIPTION_AND_REPLICATION	Influenza Viral Rna Transcription And Replication	128	0.1777	0.7467	0.953608	1	1	4274	tags=31%, list=29%, signal=44%
Reactome	REACTOME_ASSEMBLY_OF_THE_HIV_VIRION	Assembly Of The Hiv Virion	15	0.279	0.7457	0.80123	1	1	3316	tags=33%, list=22%, signal=43%
WikiPathways	WP_SENESCENCEASSOCIATED_SECRETORY_PHENOTYPE_SASP	Senescenceassociated Secretory Phenotype Sasp	94	0.1903	0.7444	0.931159	0.948623	1	2197	tags=12%, list=15%, signal=14%
Reactome	REACTOME_CELL_EXTRACELLULAR_MATRIX_INTERACTIONS	Cell Extracellular Matrix Interactions	17	0.2737	0.742	0.799154	1	1	3257	tags=29%, list=22%, signal=38%
Reactome	REACTOME_FGFR2_MUTANT_RECEPTOR_ACTIVATION	Fgfr2 Mutant Receptor Activation	20	0.2548	0.7414	0.829365	1	1	1841	tags=15%, list=12%, signal=17%
Reactome	REACTOME_HIV_TRANSCRIPTION_INITIATION	Hiv Transcription Initiation	43	0.2148	0.7342	0.867188	1	1	3837	tags=35%, list=26%, signal=47%
Reactome	REACTOME_MITOCHONDRIAL_UNFOLDED_PROTEIN_RESPONSE_UPRMT	Mitochondrial Unfolded Protein Response Uprmt	16	0.2702	0.7339	0.833006	1	1	1499	tags=19%, list=10%, signal=21%
WikiPathways	WP_METHIONINE_DE_NOVO_AND_SALVAGE_PATHWAY	Methionine De Novo And Salvage Pathway	17	0.2661	0.7336	0.80038	0.958324	1	3184	tags=29%, list=22%, signal=37%
Reactome	REACTOME_DISEASES_OF_CARBOHYDRATE_METABOLISM	Diseases Of Carbohydrate Metabolism	27	0.2342	0.7333	0.823643	1	1	568	tags=7%, list=4%, signal=8%
Reactome	REACTOME_RRNA_PROCESSING_IN_THE_MITOCHONDRION	Rrna Processing In The Mitochondrion	16	0.2698	0.7325	0.829615	1	1	10778	tags=100%, list=73%, signal=371%
Reactome	REACTOME_EXPORT_OF_VIRAL_RIBONUCLEOPROTEINS_FROM_NUCLEUS	Export Of Viral Ribonucleoproteins From Nucleus	32	0.2271	0.7313	0.865421	1	1	4274	tags=41%, list=29%, signal=57%
Reactome	REACTOME_DEPOLYMERIZATION_OF_THE_NUCLEAR_LAMINA	Depolymerization Of The Nuclear Lamina	15	0.2707	0.7302	0.813387	1	1	3628	tags=47%, list=25%, signal=62%
WikiPathways	WP_SPHINGOLIPID_METABOLISM_OVERVIEW	Sphingolipid Metabolism Overview	23	0.2495	0.7255	0.849524	0.96441	1	3014	tags=35%, list=20%, signal=44%
WikiPathways	WP_ALSTROM_SYNDROME	Alstrom Syndrome	29	0.2278	0.7246	0.862275	0.961646	1	2273	tags=21%, list=15%, signal=24%
WikiPathways	WP_ATM_SIGNALING	Atm Signaling	34	0.2202	0.7243	0.890595	0.958266	1	627	tags=9%, list=4%, signal=9%
WikiPathways	WP_FAMILIAL_PARTIAL_LIPODYSTROPHY	Familial Partial Lipodystrophy	21	0.2453	0.7216	0.84898	0.957516	1	1407	tags=14%, list=10%, signal=16%
Reactome	REACTOME_SIGNALING_BY_FGFR1	Signaling By Fgfr1	36	0.217	0.7212	0.877551	1	1	1811	tags=14%, list=12%, signal=16%
Reactome	REACTOME_EUKARYOTIC_TRANSLATION_ELONGATION	Eukaryotic Translation Elongation	83	0.1851	0.7189	0.950459	1	1	4335	tags=31%, list=29%, signal=44%
Reactome	REACTOME_RAF_ACTIVATION	Raf Activation	30	0.2298	0.7175	0.873563	1	1	2013	tags=17%, list=14%, signal=19%
Reactome	REACTOME_INHIBITION_OF_THE_PROTEOLYTIC_ACTIVITY_OF_APC_C_REQUIRED_FOR_THE_ONSET_OF_ANAPHASE_BY_MITOTIC_SPINDLE_CHECKPOINT_COMPONENTS	Inhibition Of The Proteolytic Activity Of Apc C Required For The Onset Of Anaphase By Mitotic Spindle Checkpoint Components	21	0.2422	0.7164	0.867961	1	1	4324	tags=33%, list=29%, signal=47%
WikiPathways	WP_GENETIC_CAUSES_OF_PORTOSINUSOIDAL_VASCULAR_DISEASE	Genetic Causes Of Portosinusoidal Vascular Disease	27	0.2282	0.7163	0.866397	0.959677	1	2590	tags=22%, list=18%, signal=27%
Reactome	REACTOME_PEROXISOMAL_LIPID_METABOLISM	Peroxisomal Lipid Metabolism	23	0.2327	0.715	0.857422	1	1	4381	tags=43%, list=30%, signal=62%
Reactome	REACTOME_TRANS_GOLGI_NETWORK_VESICLE_BUDDING	Trans Golgi Network Vesicle Budding	67	0.1875	0.7128	0.95619	1	1	176	tags=3%, list=1%, signal=3%
Reactome	REACTOME_REGULATION_OF_GLUCOKINASE_BY_GLUCOKINASE_REGULATORY_PROTEIN	Regulation Of Glucokinase By Glucokinase Regulatory Protein	30	0.2224	0.7117	0.887814	1	1	4274	tags=40%, list=29%, signal=56%
Reactome	REACTOME_TP53_REGULATES_TRANSCRIPTION_OF_GENES_INVOLVED_IN_CYTOCHROME_C_RELEASE	Tp53 Regulates Transcription Of Genes Involved In Cytochrome C Release	17	0.2543	0.7095	0.829615	1	1	1176	tags=12%, list=8%, signal=13%
Reactome	REACTOME_MRNA_SPLICING_MINOR_PATHWAY	Mrna Splicing Minor Pathway	49	0.2004	0.7082	0.916335	1	1	2657	tags=16%, list=18%, signal=20%
Reactome	REACTOME_SARS_COV_1_MODULATES_HOST_TRANSLATION_MACHINERY	Sars Cov 1 Modulates Host Translation Machinery	32	0.213	0.7077	0.907919	1	1	4335	tags=34%, list=29%, signal=49%
Reactome	REACTOME_VIRAL_MESSENGER_RNA_SYNTHESIS	Viral Messenger Rna Synthesis	44	0.2009	0.7048	0.925319	1	1	2166	tags=18%, list=15%, signal=21%
Reactome	REACTOME_MRNA_CAPPING	Mrna Capping	27	0.2261	0.7016	0.888247	1	1	3837	tags=30%, list=26%, signal=40%
Reactome	REACTOME_RNA_POLYMERASE_III_TRANSCRIPTION_INITIATION_FROM_TYPE_1_PROMOTER	Rna Polymerase Iii Transcription Initiation From Type 1 Promoter	27	0.2219	0.7014	0.885057	1	1	2692	tags=19%, list=18%, signal=23%
WikiPathways	WP_EFFECTS_OF_MFN2_MUTATION	Effects Of Mfn2 Mutation	21	0.2379	0.6995	0.880952	0.973053	1	1459	tags=14%, list=10%, signal=16%
Reactome	REACTOME_ABERRANT_REGULATION_OF_MITOTIC_EXIT_IN_CANCER_DUE_TO_RB1_DEFECTS	Aberrant Regulation Of Mitotic Exit In Cancer Due To Rb1 Defects	20	0.2492	0.6986	0.892578	1	1	4324	tags=30%, list=29%, signal=42%
Reactome	REACTOME_DEFECTIVE_INTRINSIC_PATHWAY_FOR_APOPTOSIS	Defective Intrinsic Pathway For Apoptosis	22	0.241	0.6984	0.864662	1	1	1450	tags=14%, list=10%, signal=15%
WikiPathways	WP_7Q1123_COPY_NUMBER_VARIATION_SYNDROME	7Q1123 Copy Number Variation Syndrome	89	0.1775	0.6981	0.96828	0.970592	1	2649	tags=20%, list=18%, signal=25%
WikiPathways	WP_NAD_BIOSYNTHETIC_PATHWAYS	Nad Biosynthetic Pathways	17	0.2582	0.6937	0.860041	0.971108	1	3536	tags=29%, list=24%, signal=39%
Reactome	REACTOME_HIV_TRANSCRIPTION_ELONGATION	Hiv Transcription Elongation	39	0.2018	0.6921	0.931507	1	1	3975	tags=28%, list=27%, signal=39%
Reactome	REACTOME_PROCESSING_OF_CAPPED_INTRONLESS_PRE_MRNA	Processing Of Capped Intronless Pre Mrna	29	0.2167	0.6885	0.886274	1	1	3714	tags=24%, list=25%, signal=32%
WikiPathways	WP_MIRTARGETED_GENES_IN_ADIPOCYTES	Mirtargeted Genes In Adipocytes	16	0.2518	0.6833	0.881148	0.976716	1	1233	tags=13%, list=8%, signal=14%
Reactome	REACTOME_DENGUE_VIRUS_MODULATES_APOPTOSIS	Dengue Virus Modulates Apoptosis	16	0.251	0.6787	0.872093	1	1	1952	tags=13%, list=13%, signal=14%
Reactome	REACTOME_RAF_INDEPENDENT_MAPK1_3_ACTIVATION	Raf Independent Mapk1 3 Activation	21	0.2303	0.6781	0.889101	1	1	1966	tags=14%, list=13%, signal=16%
Reactome	REACTOME_CONVERSION_FROM_APC_C_CDC20_TO_APC_C_CDH1_IN_LATE_ANAPHASE	Conversion From Apc C Cdc20 To Apc C Cdh1 In Late Anaphase	20	0.2326	0.6763	0.870476	1	1	4324	tags=35%, list=29%, signal=49%
Reactome	REACTOME_TRANSCRIPTIONAL_REGULATION_BY_VENTX	Transcriptional Regulation By Ventx	35	0.2042	0.6744	0.904236	1	1	826	tags=9%, list=6%, signal=9%
Reactome	REACTOME_G1_S_SPECIFIC_TRANSCRIPTION	G1 S Specific Transcription	28	0.2173	0.6736	0.900383	1	1	3320	tags=29%, list=23%, signal=37%
Reactome	REACTOME_ASSOCIATION_OF_TRIC_CCT_WITH_TARGET_PROTEINS_DURING_BIOSYNTHESIS	Association Of Tric Cct With Target Proteins During Biosynthesis	35	0.2029	0.6727	0.940385	1	1	3911	tags=34%, list=27%, signal=47%
Reactome	REACTOME_TELOMERE_MAINTENANCE	Telomere Maintenance	95	0.1675	0.6718	0.979094	1	1	2724	tags=20%, list=18%, signal=24%
WikiPathways	WP_NUCLEOSOME_REMODELING_COMPLEX	Nucleosome Remodeling Complex	28	0.2127	0.6707	0.91945	0.98356	1	2526	tags=18%, list=17%, signal=22%
Reactome	REACTOME_NEGATIVE_REGULATION_OF_MET_ACTIVITY	Negative Regulation Of Met Activity	18	0.2367	0.6681	0.889105	1	1	1811	tags=17%, list=12%, signal=19%
Reactome	REACTOME_TRANSCRIPTIONAL_REGULATION_BY_E2F6	Transcriptional Regulation By E2F6	31	0.2088	0.6678	0.946494	1	1	3290	tags=23%, list=22%, signal=29%
WikiPathways	WP_ROLES_OF_CERAMIDES_IN_DEVELOPMENT_OF_INSULIN_RESISTANCE	Roles Of Ceramides In Development Of Insulin Resistance	15	0.2524	0.6674	0.878486	0.982179	1	1061	tags=13%, list=7%, signal=14%
Reactome	REACTOME_FORMATION_OF_ATP_BY_CHEMIOSMOTIC_COUPLING	Formation Of Atp By Chemiosmotic Coupling	18	0.2387	0.665	0.893411	1	1	4238	tags=39%, list=29%, signal=54%
Reactome	REACTOME_MITOCHONDRIAL_PROTEIN_DEGRADATION	Mitochondrial Protein Degradation	84	0.1678	0.6638	0.983209	1	1	2234	tags=15%, list=15%, signal=18%
Reactome	REACTOME_TRANSCRIPTION_OF_THE_HIV_GENOME	Transcription Of The Hiv Genome	64	0.1775	0.6622	0.972426	1	1	3975	tags=31%, list=27%, signal=43%
Reactome	REACTOME_DENGUE_VIRUS_HOST_INTERACTIONS	Dengue Virus Host Interactions	256	0.1443	0.6594	1	1	1	2391	tags=11%, list=16%, signal=13%
Reactome	REACTOME_INTERACTIONS_OF_REV_WITH_HOST_CELLULAR_PROTEINS	Interactions Of Rev With Host Cellular Proteins	37	0.1942	0.6571	0.949515	1	1	4274	tags=38%, list=29%, signal=53%
Reactome	REACTOME_GLYCOSPHINGOLIPID_CATABOLISM	Glycosphingolipid Catabolism	28	0.2077	0.652	0.938931	1	1	77	tags=4%, list=1%, signal=4%
Reactome	REACTOME_SULFUR_AMINO_ACID_METABOLISM	Sulfur Amino Acid Metabolism	20	0.2258	0.6513	0.91423	1	1	205	tags=5%, list=1%, signal=5%
WikiPathways	WP_NEURODEGENERATION_WITH_BRAIN_IRON_ACCUMULATION_NBIA_SUBTYPES_PATHWAY	Neurodegeneration With Brain Iron Accumulation Nbia Subtypes Pathway	40	0.1948	0.6501	0.966418	0.990481	1	4091	tags=35%, list=28%, signal=48%
Reactome	REACTOME_RHOBTB_GTPASE_CYCLE	Rhobtb Gtpase Cycle	34	0.2	0.6451	0.946257	1	1	3379	tags=29%, list=23%, signal=38%
WikiPathways	WP_HEPATOCYTE_GROWTH_FACTOR_RECEPTOR_SIGNALING	Hepatocyte Growth Factor Receptor Signaling	32	0.2004	0.6441	0.949907	0.990415	1	1966	tags=13%, list=13%, signal=14%
Reactome	REACTOME_FORMATION_OF_THE_EARLY_ELONGATION_COMPLEX	Formation Of The Early Elongation Complex	30	0.2028	0.6432	0.938247	1	1	3975	tags=27%, list=27%, signal=36%
Reactome	REACTOME_DISEASES_ASSOCIATED_WITH_GLYCOSYLATION_PRECURSOR_BIOSYNTHESIS	Diseases Associated With Glycosylation Precursor Biosynthesis	15	0.2385	0.6387	0.917466	1	1	5134	tags=47%, list=35%, signal=71%
WikiPathways	WP_AMYOTROPHIC_LATERAL_SCLEROSIS_ALS	Amyotrophic Lateral Sclerosis Als	28	0.2025	0.6334	0.929389	0.992826	1	1952	tags=14%, list=13%, signal=16%
Reactome	REACTOME_NUCLEAR_IMPORT_OF_REV_PROTEIN	Nuclear Import Of Rev Protein	34	0.193	0.6311	0.943907	1	1	4274	tags=35%, list=29%, signal=50%
WikiPathways	WP_SARSCOV2_MITOCHONDRIAL_CHRONIC_OXIDATIVE_STRESS_AND_ENDOTHELIAL_DYSFUNCTION	Sarscov2 Mitochondrial Chronic Oxidative Stress And Endothelial Dysfunction	18	0.2278	0.629	0.950787	0.991432	1	11397	tags=100%, list=77%, signal=439%
Reactome	REACTOME_BIOSYNTHESIS_OF_THE_N_GLYCAN_PRECURSOR_DOLICHOL_LIPID_LINKED_OLIGOSACCHARIDE_LLO_AND_TRANSFER_TO_A_NASCENT_PROTEIN	Biosynthesis Of The N Glycan Precursor Dolichol Lipid Linked Oligosaccharide Llo And Transfer To A Nascent Protein	68	0.1647	0.6207	0.985213	1	1	4551	tags=41%, list=31%, signal=59%
Reactome	REACTOME_PROCESSING_OF_CAPPED_INTRON_CONTAINING_PRE_MRNA	Processing Of Capped Intron Containing Pre Mrna	279	0.131	0.6122	1	1	1	4853	tags=31%, list=33%, signal=46%
Reactome	REACTOME_SUMOYLATION_OF_UBIQUITINYLATION_PROTEINS	Sumoylation Of Ubiquitinylation Proteins	38	0.1831	0.6071	0.978261	1	1	4274	tags=34%, list=29%, signal=48%
WikiPathways	WP_DNA_IRDAMAGE_AND_CELLULAR_RESPONSE_VIA_ATR	Dna Irdamage And Cellular Response Via Atr	78	0.1539	0.6037	0.998198	0.999085	1	3973	tags=32%, list=27%, signal=44%
Reactome	REACTOME_JNK_C_JUN_KINASES_PHOSPHORYLATION_AND_ACTIVATION_MEDIATED_BY_ACTIVATED_HUMAN_TAK1	Jnk C Jun Kinases Phosphorylation And Activation Mediated By Activated Human Tak1	20	0.2067	0.6034	0.940239	1	1	3564	tags=30%, list=24%, signal=40%
WikiPathways	WP_GLYCOSYLPHOSPHATIDYL_INOSITOL_ANCHOR_PATHWAY	Glycosylphosphatidyl Inositol Anchor Pathway	24	0.2002	0.6034	0.939164	0.995485	1	2843	tags=25%, list=19%, signal=31%
Reactome	REACTOME_SIGNALING_BY_MODERATE_KINASE_ACTIVITY_BRAF_MUTANTS	Signaling By Moderate Kinase Activity Braf Mutants	34	0.1819	0.5997	0.977186	1	1	3347	tags=21%, list=23%, signal=27%
Reactome	REACTOME_RNA_POLYMERASE_II_TRANSCRIBES_SNRNA_GENES	Rna Polymerase Ii Transcribes Snrna Genes	71	0.1535	0.5935	1	1	1	3446	tags=24%, list=23%, signal=31%
Reactome	REACTOME_MATURATION_OF_TCA_ENZYMES_AND_REGULATION_OF_TCA_CYCLE	Maturation Of Tca Enzymes And Regulation Of Tca Cycle	20	0.2062	0.5864	0.965049	1	1	11716	tags=100%, list=79%, signal=485%
WikiPathways	WP_NSP1_FROM_SARSCOV2_INHIBITS_TRANSLATION_INITIATION_IN_THE_HOST_CELL	Nsp1 From Sarscov2 Inhibits Translation Initiation In The Host Cell	16	0.2171	0.5837	0.948413	0.999196	1	11554	tags=100%, list=78%, signal=460%
Reactome	REACTOME_SUMOYLATION_OF_RNA_BINDING_PROTEINS	Sumoylation Of Rna Binding Proteins	45	0.1666	0.5809	0.988722	1	1	4274	tags=33%, list=29%, signal=47%
Reactome	REACTOME_AMINO_ACIDS_REGULATE_MTORC1	Amino Acids Regulate Mtorc1	48	0.1657	0.5809	0.996205	1	1	2481	tags=19%, list=17%, signal=22%
Reactome	REACTOME_RRNA_PROCESSING	Rrna Processing	196	0.1295	0.5804	1	1	1	4944	tags=33%, list=34%, signal=48%
Reactome	REACTOME_TRANSPORT_OF_THE_SLBP_DEPENDANT_MATURE_MRNA	Transport Of The Slbp Dependant Mature Mrna	36	0.1756	0.5781	0.967433	1	1	4274	tags=36%, list=29%, signal=51%
Reactome	REACTOME_MAP2K_AND_MAPK_ACTIVATION	Map2K And Mapk Activation	32	0.1737	0.5677	0.975791	1	1	3781	tags=28%, list=26%, signal=38%
Reactome	REACTOME_RNA_POLYMERASE_II_TRANSCRIPTION_TERMINATION	Rna Polymerase Ii Transcription Termination	64	0.1496	0.5677	0.996296	1	1	5099	tags=34%, list=35%, signal=52%
Reactome	REACTOME_MEIOTIC_RECOMBINATION	Meiotic Recombination	68	0.1469	0.5614	0.994329	1	1	2655	tags=18%, list=18%, signal=21%
Reactome	REACTOME_MRNA_SPLICING	Mrna Splicing	201	0.1251	0.56	1	1	1	2845	tags=15%, list=19%, signal=19%
WikiPathways	WP_NUCLEOTIDE_METABOLISM	Nucleotide Metabolism	18	0.1937	0.5422	0.975048	1	1	4642	tags=33%, list=31%, signal=49%
WikiPathways	WP_MITOCHONDRIAL_COMPLEX_III_ASSEMBLY	Mitochondrial Complex Iii Assembly	15	0.2026	0.5408	0.976654	1	1	11768	tags=100%, list=80%, signal=493%
WikiPathways	WP_DNA_IRDOUBLE_STRAND_BREAKS_AND_CELLULAR_RESPONSE_VIA_ATM	Dna Irdouble Strand Breaks And Cellular Response Via Atm	52	0.1522	0.5398	0.99619	0.999314	1	3200	tags=23%, list=22%, signal=29%
Reactome	REACTOME_KSRP_KHSRP_BINDS_AND_DESTABILIZES_MRNA	Ksrp Khsrp Binds And Destabilizes Mrna	16	0.1931	0.5351	0.978682	1	1	4309	tags=38%, list=29%, signal=53%
Reactome	REACTOME_RETROGRADE_TRANSPORT_AT_THE_TRANS_GOLGI_NETWORK	Retrograde Transport At The Trans Golgi Network	47	0.1511	0.5328	0.998127	1	1	12532	tags=100%, list=85%, signal=662%
Reactome	REACTOME_ASSEMBLY_OF_THE_ORC_COMPLEX_AT_THE_ORIGIN_OF_REPLICATION	Assembly Of The Orc Complex At The Origin Of Replication	55	0.1455	0.5317	0.994485	1	1	3688	tags=22%, list=25%, signal=29%
WikiPathways	WP_16P112_PROXIMAL_DELETION_SYNDROME	16P112 Proximal Deletion Syndrome	58	0.1471	0.5288	0.996198	0.997409	1	3575	tags=24%, list=24%, signal=32%
Reactome	REACTOME_SIGNALLING_TO_ERKS	Signalling To Erks	27	0.163	0.5161	0.993915	1	1	278	tags=4%, list=2%, signal=4%
Reactome	REACTOME_EUKARYOTIC_TRANSLATION_INITIATION	Eukaryotic Translation Initiation	110	0.127	0.5141	1	1	1	4192	tags=26%, list=28%, signal=37%
Reactome	REACTOME_DISEASES_ASSOCIATED_WITH_N_GLYCOSYLATION_OF_PROTEINS	Diseases Associated With N Glycosylation Of Proteins	19	0.18	0.5086	0.99211	1	1	4355	tags=37%, list=30%, signal=52%
Reactome	REACTOME_NUCLEAR_RNA_DECAY	Nuclear Rna Decay	32	0.157	0.5064	0.99434	1	1	2809	tags=22%, list=19%, signal=27%
Reactome	REACTOME_DEADENYLATION_DEPENDENT_MRNA_DECAY	Deadenylation Dependent Mrna Decay	49	0.1416	0.5014	0.994197	1	1	2469	tags=16%, list=17%, signal=20%
Reactome	REACTOME_NONSENSE_MEDIATED_DECAY_NMD	Nonsense Mediated Decay Nmd	107	0.1212	0.4951	1	1	1	3576	tags=22%, list=24%, signal=29%
WikiPathways	WP_CYTOPLASMIC_RIBOSOMAL_PROTEINS	Cytoplasmic Ribosomal Proteins	80	0.1233	0.4837	1	0.999297	1	4192	tags=25%, list=28%, signal=35%
Reactome	REACTOME_RRNA_MODIFICATION_IN_THE_NUCLEUS_AND_CYTOSOL	Rrna Modification In The Nucleus And Cytosol	57	0.1341	0.4834	1	1	1	12181	tags=98%, list=83%, signal=561%
Reactome	REACTOME_HIV_ELONGATION_ARREST_AND_RECOVERY	Hiv Elongation Arrest And Recovery	31	0.1436	0.4656	1	1	1	2130	tags=13%, list=14%, signal=15%
Reactome	REACTOME_TRANSPORT_OF_MATURE_TRANSCRIPT_TO_CYTOPLASM	Transport Of Mature Transcript To Cytoplasm	79	0.1167	0.4552	1	1	1	4300	tags=28%, list=29%, signal=39%
WikiPathways	WP_COVID19_STRUCTURAL_COVERAGE_MAP	Covid19 Structural Coverage Map	19	0.1573	0.4542	0.996198	0.997693	1	1811	tags=11%, list=12%, signal=12%
Reactome	REACTOME_ACTIVATION_OF_THE_MRNA_UPON_BINDING_OF_THE_CAP_BINDING_COMPLEX_AND_EIFS_AND_SUBSEQUENT_BINDING_TO_43S	Activation Of The Mrna Upon Binding Of The Cap Binding Complex And Eifs And Subsequent Binding To 43S	54	0.1262	0.4525	1	1	1	4114	tags=26%, list=28%, signal=36%
Reactome	REACTOME_METABOLISM_OF_NITRIC_OXIDE_NOS3_ACTIVATION_AND_REGULATION	Metabolism Of Nitric Oxide Nos3 Activation And Regulation	15	0.1671	0.4457	1	1	1	3398	tags=27%, list=23%, signal=35%
Reactome	REACTOME_FORMATION_OF_RNA_POL_II_ELONGATION_COMPLEX	Formation Of Rna Pol Ii Elongation Complex	53	0.1229	0.4395	1	1	1	4150	tags=26%, list=28%, signal=37%
Reactome	REACTOME_ABORTIVE_ELONGATION_OF_HIV_1_TRANSCRIPT_IN_THE_ABSENCE_OF_TAT	Abortive Elongation Of Hiv 1 Transcript In The Absence Of Tat	22	0.1314	0.383	0.997899	0.99977	1	1841	tags=9%, list=12%, signal=10%

## Sheet: MM27_Vol_vs_DMSO
GSEA — Vol vs. DMSO | MM27 | Hallmark 2026, Reactome 2026, WikiPathways 2026 | Sorted by NES | Bold = Supplementary Fig. 5G
NES = Normalized Enrichment Score. FDR < 0.05 highlighted in green. Pathways in Supplementary Fig. 5G in bold blue. FDR < 0.25 = standard GSEA threshold.
Database	Pathway (original ID)	Pathway (readable)	Gene set size	ES	NES	NOM p-val	FDR q-val	FWER p-val	Rank at max	Leading edge
WikiPathways	WP_PHOTODYNAMIC_THERAPYINDUCED_NFKB_SURVIVAL_SIGNALING	Photodynamic Therapyinduced Nfkb Survival Signaling	27	0.5115	2.0373	0	0.0413099	0.07	583	tags=33%, list=4%, signal=35%
Reactome	REACTOME_CLASS_A_1_RHODOPSIN_LIKE_RECEPTORS	Class A 1 Rhodopsin Like Receptors	65	0.4116	1.9781	0	0.190976	0.187	3444	tags=49%, list=23%, signal=64%
Reactome	REACTOME_IKK_COMPLEX_RECRUITMENT_MEDIATED_BY_RIP1	Ikk Complex Recruitment Mediated By Rip1	19	0.5219	1.8577	0	0.259545	0.433	2354	tags=53%, list=16%, signal=63%
WikiPathways	WP_OVERVIEW_OF_PROINFLAMMATORY_AND_PROFIBROTIC_MEDIATORS	Overview Of Proinflammatory And Profibrotic Mediators	27	0.4605	1.8316	0.00413223	0.12677	0.356	2838	tags=56%, list=19%, signal=69%
Reactome	REACTOME_ANTIGEN_PROCESSING_CROSS_PRESENTATION	Antigen Processing Cross Presentation	74	0.3575	1.7819	0	0.310345	0.637	1437	tags=28%, list=10%, signal=31%
Hallmarks	HALLMARK_PROTEIN_SECRETION	Protein Secretion	91	0.34	1.7669	0	0.0147371	0.011	4358	tags=47%, list=30%, signal=67%
Reactome	REACTOME_PINK1_PRKN_MEDIATED_MITOPHAGY	Pink1 Prkn Mediated Mitophagy	30	0.4332	1.7605	0.0209205	0.270353	0.689	2688	tags=50%, list=18%, signal=61%
Reactome	REACTOME_TICAM1_RIP1_MEDIATED_IKK_COMPLEX_RECRUITMENT	Ticam1 Rip1 Mediated Ikk Complex Recruitment	17	0.529	1.7561	0.00342466	0.223494	0.698	2354	tags=53%, list=16%, signal=63%
Reactome	REACTOME_COMPLEX_IV_ASSEMBLY	Complex Iv Assembly	39	0.4073	1.7423	0	0.20695	0.732	4021	tags=56%, list=27%, signal=77%
Reactome	REACTOME_PEPTIDE_LIGAND_BINDING_RECEPTORS	Peptide Ligand Binding Receptors	38	0.4188	1.7375	0.00411523	0.184279	0.742	3029	tags=45%, list=21%, signal=56%
Reactome	REACTOME_GPCR_LIGAND_BINDING	Gpcr Ligand Binding	93	0.3261	1.7316	0	0.167727	0.751	3458	tags=43%, list=23%, signal=56%
WikiPathways	WP_MITOCHONDRIAL_COMPLEX_IV_ASSEMBLY	Mitochondrial Complex Iv Assembly	31	0.4265	1.713	0.00843882	0.208117	0.672	3235	tags=52%, list=22%, signal=66%
Reactome	REACTOME_GENE_AND_PROTEIN_EXPRESSION_BY_JAK_STAT_SIGNALING_AFTER_INTERLEUKIN_12_STIMULATION	Gene And Protein Expression By Jak Stat Signaling After Interleukin 12 Stimulation	32	0.4243	1.7114	0.00423729	0.174716	0.807	1998	tags=34%, list=14%, signal=40%
Reactome	REACTOME_SARS_COV_2_MODULATES_HOST_TRANSLATION_MACHINERY	Sars Cov 2 Modulates Host Translation Machinery	44	0.3846	1.6939	0.0104167	0.178669	0.854	1977	tags=32%, list=13%, signal=37%
Reactome	REACTOME_BBSOME_MEDIATED_CARGO_TARGETING_TO_CILIUM	Bbsome Mediated Cargo Targeting To Cilium	21	0.4542	1.673	0.0136986	0.186626	0.892	4156	tags=67%, list=28%, signal=93%
Hallmarks	HALLMARK_KRAS_SIGNALING_UP	Kras Signaling Up	122	0.3102	1.6655	0	0.0187946	0.023	1599	tags=20%, list=11%, signal=22%
WikiPathways	WP_PROSTAGLANDIN_SYNTHESIS_AND_REGULATION	Prostaglandin Synthesis And Regulation	23	0.4552	1.6578	0.0179856	0.226572	0.8	3565	tags=48%, list=24%, signal=63%
Reactome	REACTOME_ANTIGEN_PROCESSING_UB_ATP_INDEPENDENT_PROTEASOMAL_DEGRADATION	Antigen Processing Ub Atp Independent Proteasomal Degradation	16	0.4972	1.64	0.0151515	0.215183	0.93	982	tags=31%, list=7%, signal=33%
Reactome	REACTOME_INTERLEUKIN_10_SIGNALING	Interleukin 10 Signaling	20	0.4566	1.6351	0.0262295	0.2065	0.934	1019	tags=35%, list=7%, signal=38%
Reactome	REACTOME_DISEASES_OF_IMMUNE_SYSTEM	Diseases Of Immune System	21	0.4458	1.6197	0.0196078	0.212857	0.948	469	tags=29%, list=3%, signal=29%
Reactome	REACTOME_ACTIVATION_OF_APC_C_AND_APC_C_CDC20_MEDIATED_DEGRADATION_OF_MITOTIC_PROTEINS	Activation Of Apc C And Apc C Cdc20 Mediated Degradation Of Mitotic Proteins	62	0.3336	1.6013	0	0.223369	0.972	2844	tags=37%, list=19%, signal=46%
Hallmarks	HALLMARK_MYC_TARGETS_V1	Myc Targets V1	192	0.2739	1.5954	0	0.0203749	0.038	3315	tags=37%, list=22%, signal=47%
Reactome	REACTOME_COOPERATION_OF_PREFOLDIN_AND_TRIC_CCT_IN_ACTIN_AND_TUBULIN_FOLDING	Cooperation Of Prefoldin And Tric Cct In Actin And Tubulin Folding	25	0.4174	1.5884	0.0323887	0.228628	0.983	2169	tags=40%, list=15%, signal=47%
Reactome	REACTOME_SCF_SKP2_MEDIATED_DEGRADATION_OF_P27_P21	Scf Skp2 Mediated Degradation Of P27 P21	47	0.3554	1.5767	0.0253807	0.23395	0.988	2418	tags=34%, list=16%, signal=41%
Reactome	REACTOME_RIBOSOME_ASSOCIATED_QUALITY_CONTROL	Ribosome Associated Quality Control	135	0.2764	1.5609	0.010101	0.244479	0.991	2252	tags=29%, list=15%, signal=34%
Reactome	REACTOME_INTERLEUKIN_12_SIGNALING	Interleukin 12 Signaling	37	0.3648	1.5504	0.0102041	0.247453	0.995	1998	tags=30%, list=14%, signal=34%
WikiPathways	WP_PROTEASOME_DEGRADATION	Proteasome Degradation	52	0.3339	1.55	0.00896861	0.369732	0.965	1420	tags=25%, list=10%, signal=28%
Reactome	REACTOME_TRANSLATION	Translation	336	0.2464	1.5364	0	0.258149	0.997	2846	tags=32%, list=19%, signal=38%
WikiPathways	WP_ALLOGRAFT_REJECTION	Allograft Rejection	31	0.3692	1.536	0.0239044	0.338826	0.977	3240	tags=42%, list=22%, signal=54%
Reactome	REACTOME_GSK3B_MEDIATED_PROTEASOMAL_DEGRADATION_OF_PD_L1_CD274	Gsk3B Mediated Proteasomal Degradation Of Pd L1 Cd274	42	0.3533	1.5332	0.0234742	0.250934	0.997	2777	tags=38%, list=19%, signal=47%
Reactome	REACTOME_PROTEASOME_ASSEMBLY	Proteasome Assembly	47	0.3432	1.5157	0.0253807	0.263787	0.997	1437	tags=26%, list=10%, signal=28%
Reactome	REACTOME_APC_C_MEDIATED_DEGRADATION_OF_CELL_CYCLE_PROTEINS	Apc C Mediated Degradation Of Cell Cycle Proteins	73	0.3026	1.5047	0.0125786	0.269667	1	2844	tags=34%, list=19%, signal=42%
Reactome	REACTOME_SRP_DEPENDENT_COTRANSLATIONAL_PROTEIN_TARGETING_TO_MEMBRANE	Srp Dependent Cotranslational Protein Targeting To Membrane	104	0.2822	1.4971	0	0.271488	1	2989	tags=35%, list=20%, signal=43%
Reactome	REACTOME_METABOLISM_OF_STEROID_HORMONES	Metabolism Of Steroid Hormones	15	0.4604	1.4889	0.0573248	0.273268	1	1466	tags=33%, list=10%, signal=37%
Reactome	REACTOME_VIF_MEDIATED_DEGRADATION_OF_APOBEC3G	Vif Mediated Degradation Of Apobec3G	40	0.3438	1.4846	0.0393013	0.269765	1	2777	tags=38%, list=19%, signal=46%
WikiPathways	WP_ELECTRON_TRANSPORT_CHAIN_OXPHOS_SYSTEM_IN_MITOCHONDRIA	Electron Transport Chain Oxphos System In Mitochondria	83	0.2863	1.4613	0.0208333	0.453169	0.995	2582	tags=35%, list=17%, signal=42%
Reactome	REACTOME_MITOCHONDRIAL_TRANSLATION	Mitochondrial Translation	96	0.2768	1.4598	0	0.300726	1	2835	tags=35%, list=19%, signal=44%
Reactome	REACTOME_CELLULAR_RESPONSE_TO_HYPOXIA	Cellular Response To Hypoxia	57	0.3007	1.4424	0.00561798	0.321162	1	1437	tags=26%, list=10%, signal=29%
Reactome	REACTOME_UBIQUITIN_MEDIATED_DEGRADATION_OF_PHOSPHORYLATED_CDC25A	Ubiquitin Mediated Degradation Of Phosphorylated Cdc25A	49	0.3145	1.4419	0.0348837	0.31084	1	1493	tags=24%, list=10%, signal=27%
Reactome	REACTOME_SARS_COV_1_MODULATES_HOST_TRANSLATION_MACHINERY	Sars Cov 1 Modulates Host Translation Machinery	32	0.3505	1.4268	0.0756303	0.329288	1	1879	tags=28%, list=13%, signal=32%
Reactome	REACTOME_E2F_MEDIATED_REGULATION_OF_DNA_REPLICATION	E2F Mediated Regulation Of Dna Replication	21	0.3879	1.4225	0.0774648	0.326979	1	3054	tags=48%, list=21%, signal=60%
Reactome	REACTOME_REGULATION_OF_PD_L1_CD274_POST_TRANSLATIONAL_MODIFICATION	Regulation Of Pd L1 Cd274 Post Translational Modification	78	0.2781	1.4209	0.033557	0.319994	1	2515	tags=27%, list=17%, signal=32%
Reactome	REACTOME_G1_S_DNA_DAMAGE_CHECKPOINTS	G1 S Dna Damage Checkpoints	63	0.2923	1.4202	0.0163043	0.311382	1	2545	tags=32%, list=17%, signal=38%
Reactome	REACTOME_RESPIRATORY_ELECTRON_TRANSPORT	Respiratory Electron Transport	136	0.2565	1.4156	0.00980392	0.3103	1	2928	tags=35%, list=20%, signal=43%
Reactome	REACTOME_REGULATION_OF_APOPTOSIS	Regulation Of Apoptosis	39	0.3282	1.4144	0.0378378	0.303775	1	1437	tags=26%, list=10%, signal=28%
WikiPathways	WP_GLUCOCORTICOID_RECEPTOR_PATHWAY	Glucocorticoid Receptor Pathway	52	0.3041	1.4039	0.0306122	0.549967	1	1546	tags=21%, list=10%, signal=24%
WikiPathways	WP_MITOCHONDRIAL_COMPLEX_I_ASSEMBLY_MODEL_OXPHOS_SYSTEM	Mitochondrial Complex I Assembly Model Oxphos System	48	0.3091	1.3946	0.0424528	0.516758	1	2316	tags=35%, list=16%, signal=42%
Reactome	REACTOME_MITOPHAGY	Mitophagy	37	0.3407	1.3912	0.0304348	0.336418	1	2688	tags=43%, list=18%, signal=53%
WikiPathways	WP_GPCRS_CLASS_A_RHODOPSINLIKE	Gpcrs Class A Rhodopsinlike	44	0.3207	1.3897	0.0656566	0.477795	1	2860	tags=34%, list=19%, signal=42%
WikiPathways	WP_SPINAL_CORD_INJURY	Spinal Cord Injury	76	0.2776	1.3882	0.0291971	0.437976	1	1349	tags=22%, list=9%, signal=24%
WikiPathways	WP_INTEGRATIVE_ANALYSIS_OF_TREGGLIAL_INTERACTIONS	Integrative Analysis Of Tregglial Interactions	67	0.2819	1.3877	0.020979	0.402554	1	1436	tags=22%, list=10%, signal=25%
Reactome	REACTOME_FORMATION_OF_TUBULIN_FOLDING_INTERMEDIATES_BY_CCT_TRIC	Formation Of Tubulin Folding Intermediates By Cct Tric	19	0.3885	1.387	0.0709459	0.335052	1	2169	tags=42%, list=15%, signal=49%
Reactome	REACTOME_SELENOAMINO_ACID_METABOLISM	Selenoamino Acid Metabolism	105	0.2641	1.3753	0.00877193	0.348207	1	2306	tags=27%, list=16%, signal=31%
Reactome	REACTOME_RIBOSOME_QUALITY_CONTROL_RQC_COMPLEX_EXTRACTS_AND_DEGRADES_NASCENT_PEPTIDE	Ribosome Quality Control Rqc Complex Extracts And Degrades Nascent Peptide	98	0.2597	1.3746	0.0333333	0.340697	1	2777	tags=32%, list=19%, signal=39%
Reactome	REACTOME_CDK_MEDIATED_PHOSPHORYLATION_AND_REMOVAL_OF_CDC6	Cdk Mediated Phosphorylation And Removal Of Cdc6	58	0.2913	1.3665	0.0658683	0.348128	1	2777	tags=33%, list=19%, signal=40%
Reactome	REACTOME_DOWNSTREAM_TCR_SIGNALING	Downstream Tcr Signaling	61	0.2867	1.3567	0.0471204	0.359304	1	2777	tags=36%, list=19%, signal=44%
Hallmarks	HALLMARK_ALLOGRAFT_REJECTION	Allograft Rejection	96	0.2658	1.3557	0.015873	0.0990471	0.215	3390	tags=45%, list=23%, signal=58%
Reactome	REACTOME_REGULATION_OF_ORNITHINE_DECARBOXYLASE_ODC	Regulation Of Ornithine Decarboxylase Odc	36	0.3239	1.3529	0.0826087	0.358319	1	2777	tags=36%, list=19%, signal=44%
Reactome	REACTOME_COMPLEX_I_BIOGENESIS	Complex I Biogenesis	58	0.2904	1.3483	0.0809524	0.358962	1	2316	tags=34%, list=16%, signal=41%
Reactome	REACTOME_CARGO_CONCENTRATION_IN_THE_ER	Cargo Concentration In The Er	24	0.3602	1.3472	0.0885609	0.353123	1	3064	tags=42%, list=21%, signal=53%
WikiPathways	WP_IL26_SIGNALING	Il26 Signaling	33	0.3191	1.3448	0.0829694	0.468941	1	1349	tags=21%, list=9%, signal=23%
Reactome	REACTOME_SWITCHING_OF_ORIGINS_TO_A_POST_REPLICATIVE_STATE	Switching Of Origins To A Post Replicative State	77	0.2665	1.3412	0.0283688	0.35643	1	2777	tags=32%, list=19%, signal=40%
Reactome	REACTOME_INTERLEUKIN_12_FAMILY_SIGNALING	Interleukin 12 Family Signaling	42	0.3059	1.3353	0.0695187	0.360829	1	1998	tags=26%, list=14%, signal=30%
Reactome	REACTOME_EUKARYOTIC_TRANSLATION_ELONGATION	Eukaryotic Translation Elongation	83	0.2689	1.3344	0.033557	0.355098	1	2252	tags=28%, list=15%, signal=33%
Reactome	REACTOME_FORMATION_OF_ATP_BY_CHEMIOSMOTIC_COUPLING	Formation Of Atp By Chemiosmotic Coupling	18	0.3871	1.3188	0.124579	0.37787	1	2561	tags=39%, list=17%, signal=47%
Reactome	REACTOME_TNFR2_NON_CANONICAL_NF_KB_PATHWAY	Tnfr2 Non Canonical Nf Kb Pathway	64	0.2707	1.3115	0.0581395	0.384763	1	1438	tags=22%, list=10%, signal=24%
Reactome	REACTOME_MITOTIC_SPINDLE_CHECKPOINT	Mitotic Spindle Checkpoint	107	0.2465	1.3036	0.025641	0.394148	1	3679	tags=41%, list=25%, signal=54%
Reactome	REACTOME_SCF_BETA_TRCP_MEDIATED_DEGRADATION_OF_EMI1	Scf Beta Trcp Mediated Degradation Of Emi1	41	0.2923	1.2851	0.109375	0.426745	1	1437	tags=24%, list=10%, signal=27%
Reactome	REACTOME_FBXL7_DOWN_REGULATES_AURKA_DURING_MITOTIC_ENTRY_AND_IN_EARLY_MITOSIS	Fbxl7 Down Regulates Aurka During Mitotic Entry And In Early Mitosis	41	0.2931	1.2781	0.0900901	0.434345	1	2777	tags=34%, list=19%, signal=42%
Reactome	REACTOME_AEROBIC_RESPIRATION_AND_RESPIRATORY_ELECTRON_TRANSPORT	Aerobic Respiration And Respiratory Electron Transport	223	0.215	1.2774	0.0392157	0.427621	1	2928	tags=31%, list=20%, signal=39%
Reactome	REACTOME_IMMUNOREGULATORY_INTERACTIONS_BETWEEN_A_LYMPHOID_AND_A_NON_LYMPHOID_CELL	Immunoregulatory Interactions Between A Lymphoid And A Non Lymphoid Cell	32	0.3226	1.2773	0.12766	0.420034	1	699	tags=22%, list=5%, signal=23%
WikiPathways	WP_COMPLEMENT_AND_COAGULATION_CASCADES	Complement And Coagulation Cascades	24	0.3357	1.2772	0.133829	0.630601	1	3240	tags=38%, list=22%, signal=48%
Reactome	REACTOME_DEGRADATION_OF_CRY_AND_PER_PROTEINS	Degradation Of Cry And Per Proteins	47	0.283	1.2771	0.09375	0.412688	1	2924	tags=36%, list=20%, signal=45%
Reactome	REACTOME_P53_DEPENDENT_G1_DNA_DAMAGE_RESPONSE	P53 Dependent G1 Dna Damage Response	50	0.2818	1.2771	0.140541	0.40554	1	2777	tags=34%, list=19%, signal=42%
WikiPathways	WP_ANTIVIRAL_AND_ANTIINFLAMMATORY_EFFECTS_OF_NRF2_ON_SARSCOV2_PATHWAY	Antiviral And Antiinflammatory Effects Of Nrf2 On Sarscov2 Pathway	21	0.3587	1.277	0.136029	0.589026	1	2708	tags=38%, list=18%, signal=47%
Hallmarks	HALLMARK_OXIDATIVE_PHOSPHORYLATION	Oxidative Phosphorylation	196	0.217	1.2741	0.0232558	0.148313	0.363	2834	tags=32%, list=19%, signal=39%
Reactome	REACTOME_DECTIN_1_MEDIATED_NONCANONICAL_NF_KB_SIGNALING	Dectin 1 Mediated Noncanonical Nf Kb Signaling	46	0.2872	1.2705	0.105	0.413041	1	2418	tags=30%, list=16%, signal=36%
Reactome	REACTOME_RESPONSE_OF_EIF2AK4_GCN2_TO_AMINO_ACID_DEFICIENCY	Response Of Eif2Ak4 Gcn2 To Amino Acid Deficiency	93	0.2423	1.2683	0.0666667	0.41094	1	2843	tags=29%, list=19%, signal=36%
Reactome	REACTOME_SEPARATION_OF_SISTER_CHROMATIDS	Separation Of Sister Chromatids	164	0.2159	1.2663	0.0125	0.408571	1	3716	tags=37%, list=25%, signal=49%
Reactome	REACTOME_ORC1_REMOVAL_FROM_CHROMATIN	Orc1 Removal From Chromatin	56	0.2692	1.265	0.0888889	0.40428	1	2515	tags=30%, list=17%, signal=36%
Reactome	REACTOME_APC_C_CDC20_MEDIATED_DEGRADATION_OF_CYCLIN_B	Apc C Cdc20 Mediated Degradation Of Cyclin B	24	0.335	1.2605	0.155797	0.406854	1	2618	tags=33%, list=18%, signal=40%
Reactome	REACTOME_METABOLISM_OF_POLYAMINES	Metabolism Of Polyamines	43	0.2843	1.2562	0.114286	0.409097	1	2418	tags=33%, list=16%, signal=39%
Reactome	REACTOME_SYNTHESIS_OF_DNA	Synthesis Of Dna	106	0.2388	1.2548	0.0505051	0.405655	1	2777	tags=31%, list=19%, signal=38%
Reactome	REACTOME_FCERI_MEDIATED_NF_KB_ACTIVATION	Fceri Mediated Nf Kb Activation	61	0.2617	1.2536	0.0934066	0.401713	1	2777	tags=33%, list=19%, signal=40%
Reactome	REACTOME_INACTIVATION_OF_CSF3_G_CSF_SIGNALING	Inactivation Of Csf3 G Csf Signaling	21	0.3493	1.252	0.17608	0.398798	1	1420	tags=33%, list=10%, signal=37%
Reactome	REACTOME_HH_MUTANTS_ABROGATE_LIGAND_SECRETION	Hh Mutants Abrogate Ligand Secretion	42	0.2853	1.2505	0.121951	0.39537	1	1437	tags=24%, list=10%, signal=26%
WikiPathways	WP_DENGUE2_INTERACTIONS_WITH_COMPLEMENT_AND_COAGULATION_CASCADES	Dengue2 Interactions With Complement And Coagulation Cascades	24	0.3357	1.2504	0.177122	0.635679	1	3240	tags=38%, list=22%, signal=48%
Reactome	REACTOME_REGULATED_NECROSIS	Regulated Necrosis	46	0.2742	1.2467	0.11413	0.39718	1	1349	tags=22%, list=9%, signal=24%
WikiPathways	WP_EXERCISEINDUCED_CIRCADIAN_REGULATION	Exerciseinduced Circadian Regulation	41	0.283	1.244	0.125	0.618555	1	4427	tags=54%, list=30%, signal=76%
Reactome	REACTOME_RESOLUTION_OF_D_LOOP_STRUCTURES_THROUGH_SYNTHESIS_DEPENDENT_STRAND_ANNEALING_SDSA	Resolution Of D Loop Structures Through Synthesis Dependent Strand Annealing Sdsa	26	0.33	1.242	0.168539	0.400907	1	3861	tags=50%, list=26%, signal=68%
Reactome	REACTOME_UBIQUITIN_DEPENDENT_DEGRADATION_OF_CYCLIN_D	Ubiquitin Dependent Degradation Of Cyclin D	38	0.297	1.236	0.134921	0.407096	1	1437	tags=24%, list=10%, signal=26%
Reactome	REACTOME_EUKARYOTIC_TRANSLATION_INITIATION	Eukaryotic Translation Initiation	110	0.233	1.2351	0.0737705	0.40319	1	2846	tags=29%, list=19%, signal=36%
Reactome	REACTOME_ACTIVATION_OF_NF_KAPPAB_IN_B_CELLS	Activation Of Nf Kappab In B Cells	52	0.2686	1.2289	0.130653	0.410429	1	2777	tags=33%, list=19%, signal=40%
Reactome	REACTOME_COOPERATION_OF_PDCL_PHLP1_AND_TRIC_CCT_IN_G_PROTEIN_BETA_FOLDING	Cooperation Of Pdcl Phlp1 And Tric Cct In G Protein Beta Folding	26	0.3186	1.2287	0.172285	0.405431	1	2554	tags=35%, list=17%, signal=42%
WikiPathways	WP_BURN_WOUND_HEALING	Burn Wound Healing	74	0.2496	1.2283	0.122302	0.632261	1	508	tags=15%, list=3%, signal=15%
Reactome	REACTOME_MITOCHONDRIAL_TRANSLATION_ELONGATION	Mitochondrial Translation Elongation	85	0.2397	1.2256	0.120301	0.406076	1	2835	tags=32%, list=19%, signal=39%
Reactome	REACTOME_PERK_REGULATES_GENE_EXPRESSION	Perk Regulates Gene Expression	30	0.3055	1.2254	0.169742	0.401021	1	3132	tags=33%, list=21%, signal=42%
Reactome	REACTOME_MITOTIC_METAPHASE_AND_ANAPHASE	Mitotic Metaphase And Anaphase	208	0.2083	1.2202	0.0277778	0.406074	1	3315	tags=34%, list=22%, signal=43%
Reactome	REACTOME_MITOCHONDRIAL_PROTEIN_IMPORT	Mitochondrial Protein Import	58	0.2539	1.2178	0.126984	0.405856	1	4169	tags=45%, list=28%, signal=62%
Reactome	REACTOME_HOMOLOGOUS_DNA_PAIRING_AND_STRAND_EXCHANGE	Homologous Dna Pairing And Strand Exchange	41	0.2799	1.2104	0.148148	0.415987	1	3923	tags=46%, list=27%, signal=63%
Reactome	REACTOME_STABILIZATION_OF_P53	Stabilization Of P53	43	0.2743	1.2101	0.151376	0.411121	1	2777	tags=33%, list=19%, signal=40%
Reactome	REACTOME_SPOP_MEDIATED_PROTEASOMAL_DEGRADATION_OF_PD_L1_CD274	Spop Mediated Proteasomal Degradation Of Pd L1 Cd274	44	0.2807	1.2094	0.161137	0.407433	1	2777	tags=30%, list=19%, signal=36%
Reactome	REACTOME_PD_L1_CD274_GLYCOSYLATION_AND_TRANSLOCATION_TO_PLASMA_MEMBRANE	Pd L1 Cd274 Glycosylation And Translocation To Plasma Membrane	17	0.3614	1.2086	0.192593	0.404005	1	1840	tags=29%, list=12%, signal=34%
Reactome	REACTOME_REGULATION_OF_EXPRESSION_OF_SLITS_AND_ROBOS	Regulation Of Expression Of Slits And Robos	144	0.2132	1.2085	0.09375	0.399215	1	2252	tags=24%, list=15%, signal=28%
WikiPathways	WP_METABOLISM_OF_SPHINGOLIPIDS_IN_ER_AND_GOLGI_APPARATUS	Metabolism Of Sphingolipids In Er And Golgi Apparatus	18	0.3522	1.204	0.20202	0.676843	1	2020	tags=33%, list=14%, signal=39%
Reactome	REACTOME_SYNTHESIS_OF_GLYCOSYLPHOSPHATIDYLINOSITOL_GPI	Synthesis Of Glycosylphosphatidylinositol Gpi	15	0.3748	1.2027	0.192308	0.40584	1	3533	tags=47%, list=24%, signal=61%
Reactome	REACTOME_G_ALPHA_Q_SIGNALLING_EVENTS	G Alpha Q Signalling Events	93	0.2324	1.2021	0.104895	0.402141	1	1355	tags=17%, list=9%, signal=19%
Reactome	REACTOME_APC_CDC20_MEDIATED_DEGRADATION_OF_NEK2A	Apc Cdc20 Mediated Degradation Of Nek2A	26	0.316	1.2002	0.187266	0.40095	1	3679	tags=42%, list=25%, signal=56%
Reactome	REACTOME_DEGRADATION_OF_GLI1_BY_THE_PROTEASOME	Degradation Of Gli1 By The Proteasome	44	0.267	1.1963	0.16129	0.404787	1	1437	tags=23%, list=10%, signal=25%
Reactome	REACTOME_NEGATIVE_REGULATION_OF_NOTCH4_SIGNALING	Negative Regulation Of Notch4 Signaling	42	0.2749	1.1954	0.165939	0.402025	1	1437	tags=24%, list=10%, signal=26%
Reactome	REACTOME_RESOLUTION_OF_SISTER_CHROMATID_COHESION	Resolution Of Sister Chromatid Cohesion	113	0.2224	1.1935	0.0990991	0.400772	1	3716	tags=39%, list=25%, signal=52%
Reactome	REACTOME_AMPK_INDUCED_ERAD_AND_LYSOSOME_MEDIATED_DEGRADATION_OF_PD_L1_CD274	Ampk Induced Erad And Lysosome Mediated Degradation Of Pd L1 Cd274	50	0.2657	1.1903	0.175879	0.403096	1	1437	tags=20%, list=10%, signal=22%
Reactome	REACTOME_CROSS_PRESENTATION_OF_SOLUBLE_EXOGENOUS_ANTIGENS_ENDOSOMES	Cross Presentation Of Soluble Exogenous Antigens Endosomes	35	0.2818	1.1888	0.191057	0.401705	1	1437	tags=23%, list=10%, signal=25%
Reactome	REACTOME_PEPTIDE_HORMONE_METABOLISM	Peptide Hormone Metabolism	37	0.2863	1.1842	0.179283	0.406612	1	3149	tags=41%, list=21%, signal=51%
Reactome	REACTOME_SYNTHESIS_OF_ACTIVE_UBIQUITIN_ROLES_OF_E1_AND_E2_ENZYMES	Synthesis Of Active Ubiquitin Roles Of E1 And E2 Enzymes	30	0.2973	1.1834	0.179211	0.404029	1	2270	tags=33%, list=15%, signal=39%
Reactome	REACTOME_SIGNALING_BY_BMP	Signaling By Bmp	21	0.3251	1.1819	0.224335	0.402682	1	4122	tags=43%, list=28%, signal=59%
Reactome	REACTOME_TCR_SIGNALING	Tcr Signaling	77	0.239	1.1798	0.109677	0.402199	1	2777	tags=34%, list=19%, signal=41%
Hallmarks	HALLMARK_TNFA_SIGNALING_VIA_NFKB	Tnfa Signaling Via Nfkb	164	0.2064	1.179	0.111111	0.252161	0.585	1191	tags=14%, list=8%, signal=15%
Reactome	REACTOME_PYROPTOSIS	Pyroptosis	19	0.3357	1.1785	0.237654	0.400548	1	1349	tags=32%, list=9%, signal=35%
Reactome	REACTOME_REGULATION_OF_RUNX2_EXPRESSION_AND_ACTIVITY	Regulation Of Runx2 Expression And Activity	55	0.2485	1.1776	0.163743	0.398228	1	1573	tags=22%, list=11%, signal=24%
Reactome	REACTOME_INTERLEUKIN_1_FAMILY_SIGNALING	Interleukin 1 Family Signaling	110	0.2226	1.1763	0.12844	0.396898	1	2778	tags=29%, list=19%, signal=36%
Reactome	REACTOME_ACTIVATION_OF_THE_MRNA_UPON_BINDING_OF_THE_CAP_BINDING_COMPLEX_AND_EIFS_AND_SUBSEQUENT_BINDING_TO_43S	Activation Of The Mrna Upon Binding Of The Cap Binding Complex And Eifs And Subsequent Binding To 43S	54	0.2455	1.1761	0.141414	0.393127	1	2843	tags=30%, list=19%, signal=37%
Reactome	REACTOME_DOWNSTREAM_SIGNALING_EVENTS_OF_B_CELL_RECEPTOR_BCR	Downstream Signaling Events Of B Cell Receptor Bcr	65	0.246	1.1746	0.166667	0.392165	1	2777	tags=29%, list=19%, signal=36%
Reactome	REACTOME_PURINERGIC_SIGNALING_IN_LEISHMANIASIS_INFECTION	Purinergic Signaling In Leishmaniasis Infection	18	0.3465	1.1708	0.225564	0.395291	1	354	tags=17%, list=2%, signal=17%
Hallmarks	HALLMARK_INFLAMMATORY_RESPONSE	Inflammatory Response	106	0.2221	1.1705	0.153846	0.226974	0.606	2863	tags=31%, list=19%, signal=38%
WikiPathways	WP_PLURIPOTENT_STEM_CELL_DIFFERENTIATION_PATHWAY	Pluripotent Stem Cell Differentiation Pathway	21	0.3348	1.1694	0.239203	0.763692	1	1606	tags=33%, list=11%, signal=37%
Reactome	REACTOME_HSP90_CHAPERONE_CYCLE_FOR_STEROID_HORMONE_RECEPTORS_SHR_IN_THE_PRESENCE_OF_LIGAND	Hsp90 Chaperone Cycle For Steroid Hormone Receptors Shr In The Presence Of Ligand	44	0.2676	1.1658	0.19697	0.401459	1	2597	tags=30%, list=18%, signal=36%
Reactome	REACTOME_CRISTAE_FORMATION	Cristae Formation	31	0.2882	1.1647	0.248031	0.399807	1	2561	tags=32%, list=17%, signal=39%
WikiPathways	WP_GENES_RELATED_TO_PRIMARY_CILIUM_DEVELOPMENT_BASED_ON_CRISPR	Genes Related To Primary Cilium Development Based On Crispr	99	0.2214	1.1558	0.140496	0.775961	1	4410	tags=45%, list=30%, signal=64%
Hallmarks	HALLMARK_COMPLEMENT	Complement	134	0.2045	1.152	0.108108	0.22405	0.66	1497	tags=16%, list=10%, signal=18%
Reactome	REACTOME_PHOSPHORYLATION_OF_THE_APC_C	Phosphorylation Of The Apc C	20	0.3224	1.1475	0.249135	0.429848	1	2618	tags=35%, list=18%, signal=42%
WikiPathways	WP_SLC25A46_PATHWAY	Slc25A46 Pathway	20	0.3235	1.1467	0.255034	0.774544	1	3723	tags=45%, list=25%, signal=60%
Reactome	REACTOME_SOMITOGENESIS	Somitogenesis	38	0.2647	1.1451	0.235294	0.430321	1	2777	tags=32%, list=19%, signal=39%
Reactome	REACTOME_PROTEIN_LOCALIZATION	Protein Localization	143	0.202	1.1429	0.144737	0.431045	1	2467	tags=27%, list=17%, signal=32%
Reactome	REACTOME_ATF4_ACTIVATES_GENES_IN_RESPONSE_TO_ENDOPLASMIC_RETICULUM_STRESS	Atf4 Activates Genes In Response To Endoplasmic Reticulum Stress	25	0.3116	1.1378	0.278985	0.437796	1	3075	tags=32%, list=21%, signal=40%
WikiPathways	WP_OXIDATIVE_PHOSPHORYLATION	Oxidative Phosphorylation	47	0.251	1.1374	0.181373	0.772729	1	2561	tags=32%, list=17%, signal=38%
WikiPathways	WP_ZINC_HOMEOSTASIS	Zinc Homeostasis	18	0.3295	1.1335	0.267516	0.754239	1	2724	tags=39%, list=18%, signal=48%
Reactome	REACTOME_SELECTIVE_AUTOPHAGY	Selective Autophagy	75	0.2295	1.1318	0.205479	0.446176	1	2454	tags=29%, list=17%, signal=35%
WikiPathways	WP_UTERINE_NATURAL_KILLER_CELLS_AND_PROGESTERONE_ESTROGEN_AND_CHORIONIC_GONADOTROPIN	Uterine Natural Killer Cells And Progesterone Estrogen And Chorionic Gonadotropin	22	0.3105	1.1257	0.278431	0.75056	1	2837	tags=36%, list=19%, signal=45%
Reactome	REACTOME_RESOLUTION_OF_D_LOOP_STRUCTURES	Resolution Of D Loop Structures	33	0.2724	1.1244	0.26971	0.458438	1	3861	tags=45%, list=26%, signal=61%
Reactome	REACTOME_INTERLEUKIN_1_SIGNALING	Interleukin 1 Signaling	91	0.2152	1.1155	0.211921	0.474069	1	2778	tags=30%, list=19%, signal=36%
Reactome	REACTOME_COPI_INDEPENDENT_GOLGI_TO_ER_RETROGRADE_TRAFFIC	Copi Independent Golgi To Er Retrograde Traffic	43	0.2568	1.1116	0.24424	0.478629	1	2283	tags=30%, list=15%, signal=36%
Reactome	REACTOME_DEGRADATION_OF_AXIN	Degradation Of Axin	41	0.2555	1.1096	0.265766	0.479215	1	1437	tags=22%, list=10%, signal=24%
Reactome	REACTOME_RESPIRATORY_SYNCYTIAL_VIRUS_RSV_GENOME_REPLICATION_TRANSCRIPTION_AND_TRANSLATION	Respiratory Syncytial Virus Rsv Genome Replication Transcription And Translation	17	0.3262	1.107	0.315254	0.480566	1	4071	tags=47%, list=28%, signal=65%
Reactome	REACTOME_AUF1_HNRNP_D0_BINDS_AND_DESTABILIZES_MRNA	Auf1 Hnrnp D0 Binds And Destabilizes Mrna	40	0.2606	1.1069	0.273585	0.476483	1	1437	tags=23%, list=10%, signal=25%
Reactome	REACTOME_THE_ROLE_OF_GTSE1_IN_G2_M_PROGRESSION_AFTER_G2_CHECKPOINT	The Role Of Gtse1 In G2 M Progression After G2 Checkpoint	55	0.2411	1.1067	0.327684	0.472952	1	1487	tags=22%, list=10%, signal=24%
Reactome	REACTOME_COMPLEMENT_CASCADE	Complement Cascade	15	0.3289	1.1022	0.31677	0.478739	1	3240	tags=47%, list=22%, signal=60%
WikiPathways	WP_OXIDATIVE_DAMAGE_RESPONSE	Oxidative Damage Response	29	0.2729	1.1017	0.313253	0.806375	1	3168	tags=34%, list=21%, signal=44%
Reactome	REACTOME_HDR_THROUGH_HOMOLOGOUS_RECOMBINATION_HRR	Hdr Through Homologous Recombination Hrr	64	0.2243	1.1013	0.218182	0.476738	1	3923	tags=42%, list=27%, signal=57%
WikiPathways	WP_PROSTAGLANDIN_SIGNALING	Prostaglandin Signaling	15	0.3365	1.0986	0.320946	0.786297	1	904	tags=27%, list=6%, signal=28%
Reactome	REACTOME_HEDGEHOG_LIGAND_BIOGENESIS	Hedgehog Ligand Biogenesis	46	0.2503	1.0969	0.272321	0.481688	1	1437	tags=22%, list=10%, signal=24%
Reactome	REACTOME_MATURATION_OF_DENV_PROTEINS	Maturation Of Denv Proteins	48	0.2417	1.0962	0.274194	0.479391	1	2923	tags=33%, list=20%, signal=41%
WikiPathways	WP_CYTOPLASMIC_RIBOSOMAL_PROTEINS	Cytoplasmic Ribosomal Proteins	80	0.2169	1.0898	0.251701	0.788094	1	2250	tags=24%, list=15%, signal=28%
Reactome	REACTOME_TRANSLESION_SYNTHESIS_BY_POLK	Translesion Synthesis By Polk	17	0.3199	1.0886	0.323129	0.492791	1	3411	tags=41%, list=23%, signal=53%
Reactome	REACTOME_PHASE_0_RAPID_DEPOLARISATION	Phase 0 Rapid Depolarisation	15	0.3341	1.0881	0.330033	0.489734	1	1696	tags=33%, list=11%, signal=38%
Hallmarks	HALLMARK_SPERMATOGENESIS	Spermatogenesis	68	0.2237	1.0869	0.287582	0.306655	0.814	3296	tags=32%, list=22%, signal=41%
WikiPathways	WP_OLIGODENDROCYTE_SPECIFICATION_AND_DIFFERENTIATION_LEADING_TO_MYELIN_COMPONENTS_FOR_CNS	Oligodendrocyte Specification And Differentiation Leading To Myelin Components For Cns	18	0.3096	1.085	0.317073	0.777773	1	236	tags=17%, list=2%, signal=17%
Reactome	REACTOME_RRNA_PROCESSING	Rrna Processing	196	0.1867	1.0834	0.170213	0.49622	1	2404	tags=24%, list=16%, signal=29%
WikiPathways	WP_CYTOKINECYTOKINE_RECEPTOR_INTERACTION	Cytokinecytokine Receptor Interaction	88	0.2111	1.0829	0.285714	0.758977	1	765	tags=14%, list=5%, signal=14%
WikiPathways	WP_EXTRAFOLLICULAR_AND_FOLLICULAR_B_CELL_ACTIVATION_BY_SARSCOV2	Extrafollicular And Follicular B Cell Activation By Sarscov2	30	0.2704	1.0807	0.310484	0.741829	1	725	tags=17%, list=5%, signal=17%
Reactome	REACTOME_S_PHASE	S Phase	145	0.1923	1.0803	0.178082	0.499248	1	2656	tags=27%, list=18%, signal=32%
WikiPathways	WP_IMMUNE_INFILTRATION_IN_PANCREATIC_CANCER	Immune Infiltration In Pancreatic Cancer	16	0.3377	1.08	0.351097	0.720798	1	1283	tags=31%, list=9%, signal=34%
WikiPathways	WP_INTRAFLAGELLAR_TRANSPORT_PROTEINS_BINDING_TO_DYNEIN	Intraflagellar Transport Proteins Binding To Dynein	25	0.2896	1.0783	0.334532	0.704103	1	1669	tags=24%, list=11%, signal=27%
Reactome	REACTOME_INHIBITION_OF_THE_PROTEOLYTIC_ACTIVITY_OF_APC_C_REQUIRED_FOR_THE_ONSET_OF_ANAPHASE_BY_MITOTIC_SPINDLE_CHECKPOINT_COMPONENTS	Inhibition Of The Proteolytic Activity Of Apc C Required For The Onset Of Anaphase By Mitotic Spindle Checkpoint Components	21	0.3026	1.0768	0.305882	0.502847	1	3679	tags=43%, list=25%, signal=57%
WikiPathways	WP_TRYPTOPHAN_METABOLISM	Tryptophan Metabolism	18	0.3116	1.0718	0.333333	0.703496	1	2052	tags=33%, list=14%, signal=39%
Reactome	REACTOME_TRANSCRIPTIONAL_AND_POST_TRANSLATIONAL_REGULATION_OF_MITF_M_EXPRESSION_AND_ACTIVITY	Transcriptional And Post Translational Regulation Of Mitf M Expression And Activity	48	0.2271	1.0677	0.314433	0.519774	1	1527	tags=19%, list=10%, signal=21%
WikiPathways	WP_SPHINGOLIPID_PATHWAY	Sphingolipid Pathway	25	0.2791	1.0638	0.361111	0.708623	1	3167	tags=32%, list=21%, signal=41%
Reactome	REACTOME_APC_C_CDH1_MEDIATED_DEGRADATION_OF_CDC20_AND_OTHER_APC_C_CDH1_TARGETED_PROTEINS_IN_LATE_MITOSIS_EARLY_G1	Apc C Cdh1 Mediated Degradation Of Cdc20 And Other Apc C Cdh1 Targeted Proteins In Late Mitosis Early G1	60	0.2261	1.0628	0.370787	0.52678	1	2777	tags=28%, list=19%, signal=35%
Reactome	REACTOME_DENGUE_VIRUS_GENOME_TRANSLATION_AND_REPLICATION	Dengue Virus Genome Translation And Replication	76	0.2138	1.0608	0.296552	0.527388	1	2992	tags=33%, list=20%, signal=41%
WikiPathways	WP_LUNG_FIBROSIS	Lung Fibrosis	34	0.2567	1.0496	0.384956	0.731195	1	2739	tags=35%, list=19%, signal=43%
Reactome	REACTOME_DEVELOPMENTAL_CELL_LINEAGES_OF_THE_EXOCRINE_PANCREAS	Developmental Cell Lineages Of The Exocrine Pancreas	30	0.254	1.0466	0.372624	0.556883	1	2348	tags=30%, list=16%, signal=36%
Reactome	REACTOME_METABOLISM_OF_AMINO_ACIDS_AND_DERIVATIVES	Metabolism Of Amino Acids And Derivatives	268	0.1682	1.0441	0.37931	0.559021	1	2306	tags=21%, list=16%, signal=25%
Reactome	REACTOME_INFLUENZA_VIRAL_RNA_TRANSCRIPTION_AND_REPLICATION	Influenza Viral Rna Transcription And Replication	128	0.1928	1.0427	0.292135	0.558062	1	3313	tags=31%, list=22%, signal=40%
WikiPathways	WP_INFLAMMATORY_BOWEL_DISEASE_SIGNALING	Inflammatory Bowel Disease Signaling	18	0.3157	1.041	0.385382	0.737525	1	477	tags=22%, list=3%, signal=23%
Reactome	REACTOME_CASPASE_ACTIVATION_VIA_EXTRINSIC_APOPTOTIC_SIGNALLING_PATHWAY	Caspase Activation Via Extrinsic Apoptotic Signalling Pathway	18	0.3039	1.0399	0.386986	0.560401	1	1349	tags=22%, list=9%, signal=24%
Reactome	REACTOME_CYCLIN_A_CDK2_ASSOCIATED_EVENTS_AT_S_PHASE_ENTRY	Cyclin A Cdk2 Associated Events At S Phase Entry	70	0.2105	1.0395	0.373684	0.556956	1	2175	tags=24%, list=15%, signal=28%
Reactome	REACTOME_SIGNALING_BY_CSF3_G_CSF	Signaling By Csf3 G Csf	26	0.2697	1.0351	0.371324	0.563801	1	1420	tags=27%, list=10%, signal=30%
Reactome	REACTOME_DEGRADATION_OF_DVL	Degradation Of Dvl	43	0.2357	1.0348	0.377273	0.5603	1	1437	tags=21%, list=10%, signal=23%
WikiPathways	WP_MIRNA_ROLE_IN_IMMUNE_RESPONSE_IN_SEPSIS	Mirna Role In Immune Response In Sepsis	26	0.2727	1.0347	0.413534	0.738187	1	477	tags=15%, list=3%, signal=16%
Reactome	REACTOME_MAP3K8_TPL2_DEPENDENT_MAPK1_3_ACTIVATION	Map3K8 Tpl2 Dependent Mapk1 3 Activation	16	0.31	1.0338	0.387205	0.558538	1	2778	tags=31%, list=19%, signal=38%
Reactome	REACTOME_SPHINGOLIPID_DE_NOVO_BIOSYNTHESIS	Sphingolipid De Novo Biosynthesis	31	0.2539	1.0322	0.376	0.558204	1	2143	tags=23%, list=15%, signal=26%
WikiPathways	WP_T_CELL_MODULATION_AND_DESMOPLASIA_IN_PANCREATIC_CANCER	T Cell Modulation And Desmoplasia In Pancreatic Cancer	28	0.262	1.026	0.416031	0.744638	1	1399	tags=25%, list=9%, signal=28%
Reactome	REACTOME_SMOOTH_MUSCLE_CONTRACTION	Smooth Muscle Contraction	27	0.2593	1.0208	0.456897	0.581489	1	2196	tags=30%, list=15%, signal=35%
Reactome	REACTOME_POSTMITOTIC_NUCLEAR_PORE_COMPLEX_NPC_REFORMATION	Postmitotic Nuclear Pore Complex Npc Reformation	27	0.2622	1.0186	0.404	0.582733	1	3313	tags=41%, list=22%, signal=52%
Reactome	REACTOME_REGULATION_OF_RAS_BY_GAPS	Regulation Of Ras By Gaps	49	0.223	1.0174	0.439153	0.581465	1	2777	tags=29%, list=19%, signal=35%
Reactome	REACTOME_NONSENSE_MEDIATED_DECAY_NMD	Nonsense Mediated Decay Nmd	107	0.195	1.0138	0.458333	0.585761	1	2252	tags=23%, list=15%, signal=27%
Reactome	REACTOME_MITOTIC_G1_PHASE_AND_G1_S_TRANSITION	Mitotic G1 Phase And G1 S Transition	130	0.1855	1.0133	0.447368	0.582749	1	2440	tags=25%, list=17%, signal=30%
Reactome	REACTOME_RIPK1_MEDIATED_REGULATED_NECROSIS	Ripk1 Mediated Regulated Necrosis	27	0.2687	1.0119	0.422414	0.581898	1	613	tags=15%, list=4%, signal=15%
WikiPathways	WP_IL1_AND_MEGAKARYOCYTES_IN_OBESITY	Il1 And Megakaryocytes In Obesity	18	0.2958	1.0044	0.44484	0.792188	1	2708	tags=39%, list=18%, signal=48%
Reactome	REACTOME_CYCLIN_A_B1_B2_ASSOCIATED_EVENTS_DURING_G2_M_TRANSITION	Cyclin A B1 B2 Associated Events During G2 M Transition	28	0.2463	1.0039	0.421488	0.597186	1	1691	tags=25%, list=11%, signal=28%
Reactome	REACTOME_CELL_CYCLE_CHECKPOINTS	Cell Cycle Checkpoints	267	0.1645	1.0039	0.433333	0.593139	1	3513	tags=32%, list=24%, signal=42%
Reactome	REACTOME_ABC_TRANSPORTER_DISORDERS	Abc Transporter Disorders	52	0.2226	1.0037	0.4375	0.589357	1	1437	tags=19%, list=10%, signal=21%
Reactome	REACTOME_TRANSCRIPTIONAL_REGULATION_BY_E2F6	Transcriptional Regulation By E2F6	31	0.2488	1.0018	0.434389	0.589689	1	4497	tags=45%, list=30%, signal=65%
Reactome	REACTOME_ASYMMETRIC_LOCALIZATION_OF_PCP_PROTEINS	Asymmetric Localization Of Pcp Proteins	46	0.2182	1.0014	0.462766	0.586739	1	1437	tags=20%, list=10%, signal=22%
Reactome	REACTOME_FORMATION_OF_INCISION_COMPLEX_IN_GG_NER	Formation Of Incision Complex In Gg Ner	41	0.2311	0.9986	0.482759	0.589286	1	2515	tags=32%, list=17%, signal=38%
WikiPathways	WP_LDL_INFLUENCE_ON_CD14_AND_TLR4	Ldl Influence On Cd14 And Tlr4	18	0.2864	0.9851	0.462329	0.832297	1	477	tags=17%, list=3%, signal=17%
Reactome	REACTOME_DISEASES_OF_DNA_REPAIR	Diseases Of Dna Repair	49	0.2176	0.9848	0.460733	0.61839	1	5313	tags=59%, list=36%, signal=92%
Reactome	REACTOME_INTERCONVERSION_OF_NUCLEOTIDE_DI_AND_TRIPHOSPHATES	Interconversion Of Nucleotide Di And Triphosphates	24	0.2671	0.982	0.514085	0.621318	1	3933	tags=38%, list=27%, signal=51%
Reactome	REACTOME_ABC_FAMILY_PROTEINS_MEDIATED_TRANSPORT	Abc Family Proteins Mediated Transport	73	0.1979	0.9789	0.519737	0.624771	1	2175	tags=25%, list=15%, signal=29%
Reactome	REACTOME_INFLUENZA_INFECTION	Influenza Infection	146	0.1734	0.9778	0.519481	0.623047	1	2356	tags=22%, list=16%, signal=26%
Reactome	REACTOME_RECOGNITION_OF_DNA_DAMAGE_BY_PCNA_CONTAINING_REPLICATION_COMPLEX	Recognition Of Dna Damage By Pcna Containing Replication Complex	30	0.254	0.9771	0.5	0.62046	1	3438	tags=40%, list=23%, signal=52%
WikiPathways	WP_FERROPTOSIS	Ferroptosis	53	0.2094	0.9642	0.535885	0.878369	1	2454	tags=26%, list=17%, signal=32%
Reactome	REACTOME_NUCLEAR_PORE_COMPLEX_NPC_DISASSEMBLY	Nuclear Pore Complex Npc Disassembly	36	0.2322	0.9631	0.548387	0.650172	1	3313	tags=39%, list=22%, signal=50%
WikiPathways	WP_MIRNA_REGULATION_OF_DNA_DAMAGE_RESPONSE	Mirna Regulation Of Dna Damage Response	62	0.2033	0.962	0.513661	0.865115	1	2546	tags=24%, list=17%, signal=29%
Reactome	REACTOME_RAB_GERANYLGERANYLATION	Rab Geranylgeranylation	50	0.2123	0.9609	0.471503	0.651135	1	3747	tags=46%, list=25%, signal=61%
WikiPathways	WP_ARYL_HYDROCARBON_RECEPTOR_PATHWAY_WP2586	Aryl Hydrocarbon Receptor Pathway Wp2586	37	0.2255	0.9579	0.527778	0.858208	1	2490	tags=27%, list=17%, signal=32%
Reactome	REACTOME_SNRNP_ASSEMBLY	Snrnp Assembly	52	0.2091	0.9563	0.52356	0.657501	1	3313	tags=31%, list=22%, signal=40%
Reactome	REACTOME_ACTIVATION_OF_THE_PRE_REPLICATIVE_COMPLEX	Activation Of The Pre Replicative Complex	32	0.2314	0.9547	0.491597	0.657146	1	3411	tags=41%, list=23%, signal=53%
Reactome	REACTOME_SIGNALING_BY_ROBO_RECEPTORS	Signaling By Robo Receptors	182	0.1657	0.9505	0.693878	0.662946	1	2848	tags=25%, list=19%, signal=31%
Reactome	REACTOME_METABOLIC_DISORDERS_OF_BIOLOGICAL_OXIDATION_ENZYMES	Metabolic Disorders Of Biological Oxidation Enzymes	19	0.2716	0.9464	0.546326	0.668818	1	1902	tags=26%, list=13%, signal=30%
Reactome	REACTOME_NEGATIVE_REGULATORS_OF_DDX58_IFIH1_SIGNALING	Negative Regulators Of Ddx58 Ifih1 Signaling	31	0.2327	0.9406	0.577947	0.678362	1	1786	tags=26%, list=12%, signal=29%
WikiPathways	WP_EICOSANOID_METABOLISM_VIA_CYCLOOXYGENASES_COX	Eicosanoid Metabolism Via Cyclooxygenases Cox	15	0.2869	0.94	0.553746	0.89161	1	2691	tags=27%, list=18%, signal=33%
Reactome	REACTOME_REGULATION_OF_PTEN_STABILITY_AND_ACTIVITY	Regulation Of Pten Stability And Activity	51	0.1975	0.932	0.598958	0.693902	1	1437	tags=18%, list=10%, signal=19%
WikiPathways	WP_UNFOLDED_PROTEIN_RESPONSE	Unfolded Protein Response	23	0.2409	0.9308	0.543396	0.898236	1	217	tags=9%, list=1%, signal=9%
Reactome	REACTOME_SIGNALING_BY_THE_B_CELL_RECEPTOR_BCR	Signaling By The B Cell Receptor Bcr	86	0.182	0.9263	0.65	0.702907	1	2777	tags=26%, list=19%, signal=31%
Reactome	REACTOME_POST_TRANSLATIONAL_MODIFICATION_SYNTHESIS_OF_GPI_ANCHORED_PROTEINS	Post Translational Modification Synthesis Of Gpi Anchored Proteins	39	0.2108	0.9198	0.608889	0.713424	1	1182	tags=15%, list=8%, signal=17%
Reactome	REACTOME_TERMINATION_OF_TRANSLESION_DNA_SYNTHESIS	Termination Of Translesion Dna Synthesis	29	0.2334	0.9192	0.565543	0.710651	1	3411	tags=41%, list=23%, signal=54%
Reactome	REACTOME_TRANSLESION_SYNTHESIS_BY_POLH	Translesion Synthesis By Polh	19	0.2594	0.9154	0.561644	0.714988	1	3524	tags=37%, list=24%, signal=48%
WikiPathways	WP_HAIR_FOLLICLE_DEVELOPMENT_CYTODIFFERENTIATION_STAGE_3_OF_3	Hair Follicle Development Cytodifferentiation Stage 3 Of 3	44	0.1986	0.9105	0.64455	0.937265	1	3201	tags=27%, list=22%, signal=35%
WikiPathways	WP_TLR4_SIGNALING_AND_TOLERANCE	Tlr4 Signaling And Tolerance	21	0.2475	0.9081	0.611307	0.924715	1	1817	tags=24%, list=12%, signal=27%
WikiPathways	WP_OXIDATION_BY_CYTOCHROME_P450	Oxidation By Cytochrome P450	23	0.2403	0.9076	0.590551	0.906972	1	3046	tags=30%, list=21%, signal=38%
WikiPathways	WP_IMATINIB_AND_CHRONIC_MYELOID_LEUKEMIA	Imatinib And Chronic Myeloid Leukemia	18	0.2633	0.9049	0.573248	0.896443	1	476	tags=17%, list=3%, signal=17%
Reactome	REACTOME_RNA_POLYMERASE_III_CHAIN_ELONGATION	Rna Polymerase Iii Chain Elongation	18	0.2616	0.902	0.620567	0.740812	1	611	tags=17%, list=4%, signal=17%
WikiPathways	WP_PHOTODYNAMIC_THERAPYINDUCED_HIF1_SURVIVAL_SIGNALING	Photodynamic Therapyinduced Hif1 Survival Signaling	33	0.2186	0.8955	0.602679	0.903434	1	490	tags=12%, list=3%, signal=13%
WikiPathways	WP_DNA_DAMAGE_RESPONSE	Dna Damage Response	60	0.1845	0.8917	0.74269	0.896051	1	2546	tags=23%, list=17%, signal=28%
WikiPathways	WP_GENETIC_CAUSES_OF_PORTOSINUSOIDAL_VASCULAR_DISEASE	Genetic Causes Of Portosinusoidal Vascular Disease	27	0.2278	0.8865	0.646617	0.893186	1	2716	tags=30%, list=18%, signal=36%
WikiPathways	WP_SODIUM_CHANNEL_IN_EPILEPSY	Sodium Channel In Epilepsy	22	0.2453	0.8817	0.644295	0.887973	1	1696	tags=23%, list=11%, signal=26%
Reactome	REACTOME_DNA_DAMAGE_BYPASS	Dna Damage Bypass	45	0.196	0.8773	0.711538	0.789886	1	3524	tags=36%, list=24%, signal=47%
Reactome	REACTOME_INITIATION_OF_NUCLEAR_ENVELOPE_NE_REFORMATION	Initiation Of Nuclear Envelope Ne Reformation	19	0.249	0.8585	0.678322	0.82451	1	2912	tags=37%, list=20%, signal=46%
Reactome	REACTOME_MITOCHONDRIAL_CALCIUM_ION_TRANSPORT	Mitochondrial Calcium Ion Transport	20	0.2381	0.8513	0.697509	0.834466	1	2454	tags=35%, list=17%, signal=42%
Reactome	REACTOME_NICOTINATE_METABOLISM	Nicotinate Metabolism	21	0.2334	0.8424	0.707746	0.846896	1	2994	tags=38%, list=20%, signal=48%
WikiPathways	WP_PROXIMAL_TUBULE_TRANSPORT	Proximal Tubule Transport	32	0.2026	0.8312	0.763158	0.98867	1	3565	tags=38%, list=24%, signal=49%
WikiPathways	WP_TYPE_II_INTERFERON_SIGNALING	Type Ii Interferon Signaling	21	0.2267	0.8279	0.751852	0.978594	1	217	tags=10%, list=1%, signal=10%
WikiPathways	WP_GLYCOSYLPHOSPHATIDYL_INOSITOL_ANCHOR_PATHWAY	Glycosylphosphatidyl Inositol Anchor Pathway	24	0.2134	0.8245	0.745174	0.968882	1	1182	tags=17%, list=8%, signal=18%
Reactome	REACTOME_RAS_PROCESSING	Ras Processing	20	0.2331	0.8236	0.732143	0.876951	1	2567	tags=30%, list=17%, signal=36%
Reactome	REACTOME_DEADENYLATION_DEPENDENT_MRNA_DECAY	Deadenylation Dependent Mrna Decay	49	0.1794	0.823	0.815	0.872977	1	2203	tags=22%, list=15%, signal=26%
WikiPathways	WP_NUCLEOTIDE_METABOLISM	Nucleotide Metabolism	18	0.2352	0.8178	0.746711	0.965169	1	4226	tags=50%, list=29%, signal=70%
Reactome	REACTOME_CYTOSOLIC_TRNA_AMINOACYLATION	Cytosolic Trna Aminoacylation	22	0.2205	0.8164	0.796429	0.879828	1	1527	tags=18%, list=10%, signal=20%
Reactome	REACTOME_CLASS_I_PEROXISOMAL_MEMBRANE_PROTEIN_IMPORT	Class I Peroxisomal Membrane Protein Import	19	0.2343	0.8155	0.765079	0.876287	1	3219	tags=42%, list=22%, signal=54%
Reactome	REACTOME_TELOMERE_C_STRAND_LAGGING_STRAND_SYNTHESIS	Telomere C Strand Lagging Strand Synthesis	32	0.1976	0.8091	0.792308	0.881957	1	3686	tags=41%, list=25%, signal=54%
Reactome	REACTOME_NRIF_SIGNALS_CELL_DEATH_FROM_THE_NUCLEUS	Nrif Signals Cell Death From The Nucleus	15	0.2501	0.8075	0.719745	0.879613	1	530	tags=13%, list=4%, signal=14%
Hallmarks	HALLMARK_ANDROGEN_RESPONSE	Androgen Response	92	0.1569	0.8019	0.850746	0.876498	0.997	4427	tags=38%, list=30%, signal=54%
Reactome	REACTOME_ABERRANT_REGULATION_OF_MITOTIC_EXIT_IN_CANCER_DUE_TO_RB1_DEFECTS	Aberrant Regulation Of Mitotic Exit In Cancer Due To Rb1 Defects	20	0.2252	0.7775	0.804795	0.920822	1	3880	tags=40%, list=26%, signal=54%
WikiPathways	WP_SPHINGOLIPID_METABOLISM_INTEGRATED_PATHWAY	Sphingolipid Metabolism Integrated Pathway	23	0.2104	0.7754	0.843284	1	1	3167	tags=30%, list=21%, signal=39%
Reactome	REACTOME_CONVERSION_FROM_APC_C_CDC20_TO_APC_C_CDH1_IN_LATE_ANAPHASE	Conversion From Apc C Cdc20 To Apc C Cdh1 In Late Anaphase	20	0.2141	0.7738	0.805147	0.920816	1	3679	tags=40%, list=25%, signal=53%
Reactome	REACTOME_TRANSLESION_SYNTHESIS_BY_Y_FAMILY_DNA_POLYMERASES_BYPASSES_LESIONS_ON_DNA_TEMPLATE	Translesion Synthesis By Y Family Dna Polymerases Bypasses Lesions On Dna Template	36	0.1809	0.7737	0.839623	0.915805	1	3524	tags=36%, list=24%, signal=47%
WikiPathways	WP_NSP1_FROM_SARSCOV2_INHIBITS_TRANSLATION_INITIATION_IN_THE_HOST_CELL	Nsp1 From Sarscov2 Inhibits Translation Initiation In The Host Cell	16	0.2259	0.7717	0.818182	1	1	3390	tags=38%, list=23%, signal=49%
Reactome	REACTOME_IRON_UPTAKE_AND_TRANSPORT	Iron Uptake And Transport	48	0.1721	0.7716	0.894977	0.913578	1	2235	tags=21%, list=15%, signal=24%
Reactome	REACTOME_PEROXISOMAL_PROTEIN_IMPORT	Peroxisomal Protein Import	52	0.1688	0.7628	0.893939	0.92014	1	2060	tags=21%, list=14%, signal=24%
Reactome	REACTOME_REGULATION_OF_MITF_M_DEPENDENT_GENES_INVOLVED_IN_LYSOSOME_BIOGENESIS_AND_AUTOPHAGY	Regulation Of Mitf M Dependent Genes Involved In Lysosome Biogenesis And Autophagy	17	0.2262	0.7592	0.804054	0.919437	1	4212	tags=53%, list=29%, signal=74%
WikiPathways	WP_MITOCHONDRIAL_LONG_CHAIN_FATTY_ACID_BETAOXIDATION	Mitochondrial Long Chain Fatty Acid Betaoxidation	16	0.2262	0.7572	0.799363	1	1	2313	tags=25%, list=16%, signal=30%
WikiPathways	WP_2Q13_COPY_NUMBER_VARIATION_SYNDROME	2Q13 Copy Number Variation Syndrome	40	0.1716	0.7569	0.899123	1	1	1283	tags=13%, list=9%, signal=14%
Reactome	REACTOME_PROCESSIVE_SYNTHESIS_ON_THE_C_STRAND_OF_THE_TELOMERE	Processive Synthesis On The C Strand Of The Telomere	19	0.2116	0.7445	0.841751	0.932041	1	3686	tags=42%, list=25%, signal=56%
Reactome	REACTOME_ANTIGEN_PRESENTATION_FOLDING_ASSEMBLY_AND_PEPTIDE_LOADING_OF_CLASS_I_MHC	Antigen Presentation Folding Assembly And Peptide Loading Of Class I Mhc	21	0.2016	0.7425	0.85348	0.929057	1	2174	tags=19%, list=15%, signal=22%
Reactome	REACTOME_M_DECAY_DEGRADATION_OF_MATERNAL_MRNAS_BY_MATERNALLY_STORED_FACTORS	M Decay Degradation Of Maternal Mrnas By Maternally Stored Factors	26	0.187	0.7375	0.862205	0.929833	1	2917	tags=27%, list=20%, signal=33%
WikiPathways	WP_NANOMATERIAL_INDUCED_APOPTOSIS	Nanomaterial Induced Apoptosis	17	0.22	0.7349	0.836013	1	1	1349	tags=18%, list=9%, signal=19%
Reactome	REACTOME_LAGGING_STRAND_SYNTHESIS	Lagging Strand Synthesis	20	0.2112	0.7346	0.85274	0.927904	1	3411	tags=40%, list=23%, signal=52%
WikiPathways	WP_APOPTOSIS_MODULATION_BY_HSP70	Apoptosis Modulation By Hsp70	17	0.2143	0.7231	0.885621	1	1	1349	tags=18%, list=9%, signal=19%
WikiPathways	WP_ETHER_LIPID_BIOSYNTHESIS	Ether Lipid Biosynthesis	18	0.2064	0.7125	0.85625	1	1	3215	tags=33%, list=22%, signal=43%
Reactome	REACTOME_O_LINKED_GLYCOSYLATION_OF_MUCINS	O Linked Glycosylation Of Mucins	30	0.1819	0.7107	0.922481	0.946365	1	3333	tags=27%, list=23%, signal=34%
Reactome	REACTOME_G0_AND_EARLY_G1	G0 And Early G1	26	0.1857	0.71	0.870504	0.941877	1	2663	tags=23%, list=18%, signal=28%
WikiPathways	WP_METHIONINE_DE_NOVO_AND_SALVAGE_PATHWAY	Methionine De Novo And Salvage Pathway	17	0.2085	0.7058	0.886435	0.999925	1	3263	tags=35%, list=22%, signal=45%
WikiPathways	WP_INTERACTOME_OF_POLYCOMB_REPRESSIVE_COMPLEX_2_PRC2	Interactome Of Polycomb Repressive Complex 2 Prc2	16	0.2178	0.6909	0.872414	0.998532	1	4196	tags=31%, list=28%, signal=44%
WikiPathways	WP_UREA_CYCLE_AND_ASSOCIATED_PATHWAYS	Urea Cycle And Associated Pathways	16	0.2041	0.6837	0.883162	0.989723	1	1940	tags=25%, list=13%, signal=29%
Reactome	REACTOME_RHOBTB1_GTPASE_CYCLE	Rhobtb1 Gtpase Cycle	23	0.1859	0.6796	0.929688	0.960894	1	3966	tags=35%, list=27%, signal=47%
WikiPathways	WP_IRONSULFUR_CLUSTER_BIOGENESIS	Ironsulfur Cluster Biogenesis	15	0.1968	0.6548	0.921569	0.995367	1	2714	tags=27%, list=18%, signal=33%
WikiPathways	WP_MITOCHONDRIAL_COMPLEX_III_ASSEMBLY	Mitochondrial Complex Iii Assembly	15	0.1988	0.6509	0.932945	0.983509	1	3809	tags=40%, list=26%, signal=54%
WikiPathways	WP_MITOCHONDRIAL_FATTY_ACID_OXIDATION_DISORDERS	Mitochondrial Fatty Acid Oxidation Disorders	18	0.1806	0.6282	0.94403	0.981105	1	2313	tags=22%, list=16%, signal=26%
Reactome	REACTOME_TELOMERE_EXTENSION_BY_TELOMERASE	Telomere Extension By Telomerase	20	0.1766	0.6213	0.961538	0.987341	1	4505	tags=40%, list=31%, signal=58%
Reactome	REACTOME_COMPLEX_III_ASSEMBLY	Complex Iii Assembly	23	0.1583	0.5882	0.98983	0.993076	1	3809	tags=35%, list=26%, signal=47%
WikiPathways	WP_GASTRIC_CANCER_NETWORK_1	Gastric Cancer Network 1	21	0.1613	0.578	0.96831	0.985002	1	4751	tags=48%, list=32%, signal=70%
Reactome	REACTOME_JNK_C_JUN_KINASES_PHOSPHORYLATION_AND_ACTIVATION_MEDIATED_BY_ACTIVATED_HUMAN_TAK1	Jnk C Jun Kinases Phosphorylation And Activation Mediated By Activated Human Tak1	20	0.161	0.5745	0.969799	0.991338	1	2778	tags=25%, list=19%, signal=31%
Reactome	REACTOME_SYNTHESIS_OF_PIPS_AT_THE_EARLY_ENDOSOME_MEMBRANE	Synthesis Of Pips At The Early Endosome Membrane	16	0.1594	0.5263	0.996785	0.994514	1	12405	tags=100%, list=84%, signal=627%

## Sheet: MM27_Vol+Aur_vs_DMSO
GSEA — Vol+Aur vs. DMSO | MM27 | Hallmark 2026, Reactome 2026, WikiPathways 2026 | Sorted by NES | Bold = Fig. 5B
NES = Normalized Enrichment Score. FDR < 0.05 highlighted in green. Pathways in Fig. 5B in bold blue. FDR < 0.25 = standard GSEA threshold.
Database	Pathway (original ID)	Pathway (readable)	Gene set size	ES	NES	NOM p-val	FDR q-val	FWER p-val	Rank at max	Leading edge
WikiPathways	WP_PHOTODYNAMIC_THERAPYINDUCED_NFE2L2_NRF2_SURVIVAL_SIGNALING	Photodynamic Therapyinduced Nfe2L2 Nrf2 Survival Signaling	20	0.8324	2.4148	0	0	0	477	tags=60%, list=3%, signal=62%
Hallmarks	HALLMARK_REACTIVE_OXYGEN_SPECIES_PATHWAY	Reactive Oxygen Species Pathway	41	0.7242	2.3858	0	0	0	2080	tags=56%, list=14%, signal=65%
Reactome	REACTOME_RECOGNITION_AND_ASSOCIATION_OF_DNA_GLYCOSYLASE_WITH_SITE_CONTAINING_AN_AFFECTED_PURINE	Recognition And Association Of Dna Glycosylase With Site Containing An Affected Purine	43	0.6866	2.3283	0	0	0	3899	tags=84%, list=26%, signal=113%
Reactome	REACTOME_DNA_METHYLATION	Dna Methylation	50	0.6692	2.3155	0	0	0	3899	tags=84%, list=26%, signal=114%
Reactome	REACTOME_ASSEMBLY_OF_THE_ORC_COMPLEX_AT_THE_ORIGIN_OF_REPLICATION	Assembly Of The Orc Complex At The Origin Of Replication	55	0.6701	2.3114	0	0	0	3899	tags=82%, list=26%, signal=111%
Reactome	REACTOME_SIRT1_NEGATIVELY_REGULATES_RRNA_EXPRESSION	Sirt1 Negatively Regulates Rrna Expression	54	0.6577	2.2973	0	0	0	3899	tags=81%, list=26%, signal=110%
Reactome	REACTOME_TRANSCRIPTIONAL_REGULATION_BY_SMALL_RNAS	Transcriptional Regulation By Small Rnas	63	0.6408	2.2773	0	0	0	3899	tags=78%, list=26%, signal=105%
Reactome	REACTOME_ACTIVATED_PKN1_STIMULATES_TRANSCRIPTION_OF_AR_ANDROGEN_RECEPTOR_REGULATED_GENES_KLK2_AND_KLK3	Activated Pkn1 Stimulates Transcription Of Ar Androgen Receptor Regulated Genes Klk2 And Klk3	51	0.6639	2.2722	0	0	0	3899	tags=84%, list=26%, signal=114%
Reactome	REACTOME_BASE_EXCISION_REPAIR_AP_SITE_FORMATION	Base Excision Repair Ap Site Formation	50	0.6485	2.254	0	0	0	3899	tags=76%, list=26%, signal=103%
Reactome	REACTOME_HCMV_LATE_EVENTS	Hcmv Late Events	101	0.596	2.2463	0	0	0	3775	tags=62%, list=26%, signal=83%
Reactome	REACTOME_RUNX1_REGULATES_TRANSCRIPTION_OF_GENES_INVOLVED_IN_DIFFERENTIATION_OF_HSCS	Runx1 Regulates Transcription Of Genes Involved In Differentiation Of Hscs	94	0.5938	2.2433	0	0	0	3937	tags=76%, list=27%, signal=102%
Reactome	REACTOME_REGULATION_OF_ENDOGENOUS_RETROELEMENTS_BY_THE_HUMAN_SILENCING_HUB_HUSH_COMPLEX	Regulation Of Endogenous Retroelements By The Human Silencing Hub Hush Complex	56	0.6357	2.228	0	0	0	3899	tags=77%, list=26%, signal=104%
Reactome	REACTOME_INHIBITION_OF_DNA_RECOMBINATION_AT_TELOMERE	Inhibition Of Dna Recombination At Telomere	55	0.6255	2.2158	0	0	0	3899	tags=73%, list=26%, signal=98%
Reactome	REACTOME_CHROMATIN_MODIFICATIONS_DURING_THE_MATERNAL_TO_ZYGOTIC_TRANSITION_MZT	Chromatin Modifications During The Maternal To Zygotic Transition Mzt	54	0.6244	2.208	0	0	0	3899	tags=78%, list=26%, signal=105%
Reactome	REACTOME_NUCLEAR_EVENTS_MEDIATED_BY_NFE2L2	Nuclear Events Mediated By Nfe2L2	82	0.5914	2.1946	0	0	0	3639	tags=61%, list=25%, signal=80%
Reactome	REACTOME_BASE_EXCISION_REPAIR	Base Excision Repair	78	0.5937	2.1891	0	0	0	3955	tags=62%, list=27%, signal=84%
Reactome	REACTOME_RNA_POLYMERASE_I_PROMOTER_ESCAPE	Rna Polymerase I Promoter Escape	73	0.6007	2.1817	0	0	0	3899	tags=68%, list=26%, signal=93%
Reactome	REACTOME_AMYLOID_FIBER_FORMATION	Amyloid Fiber Formation	79	0.5886	2.1676	0	0	0	3563	tags=68%, list=24%, signal=90%
WikiPathways	WP_NRF2_PATHWAY	Nrf2 Pathway	80	0.5862	2.1563	0	0.000504494	0.001	1739	tags=43%, list=12%, signal=48%
Reactome	REACTOME_DNA_REPLICATION_PRE_INITIATION	Dna Replication Pre Initiation	134	0.5509	2.1511	0	6.08188e-05	0.001	3955	tags=62%, list=27%, signal=84%
Reactome	REACTOME_SENESCENCE_ASSOCIATED_SECRETORY_PHENOTYPE_SASP	Senescence Associated Secretory Phenotype Sasp	93	0.57	2.1496	0	5.744e-05	0.001	4008	tags=66%, list=27%, signal=89%
Reactome	REACTOME_REPLACEMENT_OF_PROTAMINES_BY_NUCLEOSOMES_IN_THE_MALE_PRONUCLEUS	Replacement Of Protamines By Nucleosomes In The Male Pronucleus	30	0.6784	2.1475	0	5.44168e-05	0.001	4152	tags=87%, list=28%, signal=120%
WikiPathways	WP_SENESCENCEASSOCIATED_SECRETORY_PHENOTYPE_SASP	Senescenceassociated Secretory Phenotype Sasp	94	0.5678	2.1412	0	0.000678816	0.002	4008	tags=65%, list=27%, signal=89%
WikiPathways	WP_TELOMERE_END_PACKAGING_AND_NEURODEVELOPMENTAL_DISORDERS	Telomere End Packaging And Neurodevelopmental Disorders	37	0.6676	2.1382	0	0.000509112	0.002	4152	tags=81%, list=28%, signal=113%
Reactome	REACTOME_KEAP1_NFE2L2_PATHWAY	Keap1 Nfe2L2 Pathway	107	0.5531	2.135	0	0.000103917	0.002	3639	tags=56%, list=25%, signal=74%
Reactome	REACTOME_HDACS_DEACETYLATE_HISTONES	Hdacs Deacetylate Histones	79	0.5775	2.1345	0	9.89684e-05	0.002	3563	tags=66%, list=24%, signal=86%
Reactome	REACTOME_DEFECTIVE_PYROPTOSIS	Defective Pyroptosis	59	0.5975	2.1253	0	0.000235063	0.005	3899	tags=75%, list=26%, signal=101%
Reactome	REACTOME_TNFR2_NON_CANONICAL_NF_KB_PATHWAY	Tnfr2 Non Canonical Nf Kb Pathway	64	0.596	2.1245	0	0.000224843	0.005	4050	tags=67%, list=27%, signal=92%
Reactome	REACTOME_ERCC6_CSB_AND_EHMT2_G9A_POSITIVELY_REGULATE_RRNA_EXPRESSION	Ercc6 Csb And Ehmt2 G9A Positively Regulate Rrna Expression	60	0.5957	2.1174	0	0.000258125	0.006	4152	tags=75%, list=28%, signal=104%
Reactome	REACTOME_HCMV_INFECTION	Hcmv Infection	137	0.54	2.115	0	0.0002478	0.006	3656	tags=53%, list=25%, signal=70%
Reactome	REACTOME_HCMV_EARLY_EVENTS	Hcmv Early Events	115	0.5496	2.1149	0	0.00023827	0.006	3563	tags=55%, list=24%, signal=72%
Reactome	REACTOME_RHO_GTPASES_ACTIVATE_PKNS	Rho Gtpases Activate Pkns	73	0.5841	2.1064	0	0.000307205	0.008	3563	tags=64%, list=24%, signal=84%
Hallmarks	HALLMARK_XENOBIOTIC_METABOLISM	Xenobiotic Metabolism	133	0.5341	2.0925	0	0	0	2135	tags=38%, list=14%, signal=44%
Reactome	REACTOME_BASIGIN_INTERACTIONS	Basigin Interactions	21	0.7048	2.0811	0	0.000444276	0.012	2022	tags=48%, list=14%, signal=55%
Reactome	REACTOME_NEGATIVE_EPIGENETIC_REGULATION_OF_RRNA_EXPRESSION	Negative Epigenetic Regulation Of Rrna Expression	92	0.5466	2.0751	0	0.000499563	0.014	3899	tags=59%, list=26%, signal=79%
Reactome	REACTOME_VIF_MEDIATED_DEGRADATION_OF_APOBEC3G	Vif Mediated Degradation Of Apobec3G	40	0.6234	2.074	0	0.00048291	0.014	4050	tags=73%, list=27%, signal=100%
Reactome	REACTOME_DISEASES_OF_PROGRAMMED_CELL_DEATH	Diseases Of Programmed Cell Death	87	0.5569	2.0734	0	0.000467333	0.014	3899	tags=64%, list=26%, signal=87%
Reactome	REACTOME_MEIOTIC_RECOMBINATION	Meiotic Recombination	68	0.5741	2.0723	0	0.000452729	0.014	3899	tags=66%, list=26%, signal=90%
Reactome	REACTOME_DECTIN_1_MEDIATED_NONCANONICAL_NF_KB_SIGNALING	Dectin 1 Mediated Noncanonical Nf Kb Signaling	46	0.6152	2.0684	0	0.000439009	0.014	4302	tags=72%, list=29%, signal=101%
Reactome	REACTOME_RIBOSOME_ASSOCIATED_QUALITY_CONTROL	Ribosome Associated Quality Control	135	0.5262	2.0661	0	0.000426097	0.014	4903	tags=64%, list=33%, signal=95%
Reactome	REACTOME_REGULATION_OF_ENDOGENOUS_RETROELEMENTS_BY_PIWI_INTERACTING_RNAS_PIRNAS	Regulation Of Endogenous Retroelements By Piwi Interacting Rnas Pirnas	79	0.5576	2.0618	0	0.000413923	0.014	4249	tags=66%, list=29%, signal=92%
Reactome	REACTOME_PRC2_METHYLATES_HISTONES_AND_DNA	Prc2 Methylates Histones And Dna	60	0.5861	2.0608	0	0.000402425	0.014	3899	tags=72%, list=26%, signal=97%
Reactome	REACTOME_GENE_SILENCING_BY_RNA	Gene Silencing By Rna	83	0.5526	2.0556	0	0.000447146	0.016	3899	tags=63%, list=26%, signal=85%
Reactome	REACTOME_TRANSCRIPTIONAL_REGULATION_OF_GRANULOPOIESIS	Transcriptional Regulation Of Granulopoiesis	70	0.5618	2.054	0	0.000435379	0.016	3563	tags=67%, list=24%, signal=88%
Reactome	REACTOME_CROSS_PRESENTATION_OF_SOLUBLE_EXOGENOUS_ANTIGENS_ENDOSOMES	Cross Presentation Of Soluble Exogenous Antigens Endosomes	35	0.6327	2.0448	0	0.000450594	0.017	4302	tags=80%, list=29%, signal=113%
Reactome	REACTOME_UBIQUITIN_DEPENDENT_DEGRADATION_OF_CYCLIN_D	Ubiquitin Dependent Degradation Of Cyclin D	38	0.6241	2.0433	0.00126263	0.000464983	0.018	4050	tags=76%, list=27%, signal=105%
Reactome	REACTOME_CONDENSATION_OF_PROPHASE_CHROMOSOMES	Condensation Of Prophase Chromosomes	59	0.5827	2.0431	0	0.000453642	0.018	3899	tags=73%, list=26%, signal=99%
Hallmarks	HALLMARK_TNFA_SIGNALING_VIA_NFKB	Tnfa Signaling Via Nfkb	164	0.5126	2.0427	0	0	0	3222	tags=43%, list=22%, signal=55%
WikiPathways	WP_ANTIVIRAL_AND_ANTIINFLAMMATORY_EFFECTS_OF_NRF2_ON_SARSCOV2_PATHWAY	Antiviral And Antiinflammatory Effects Of Nrf2 On Sarscov2 Pathway	21	0.7103	2.0416	0	0.00162716	0.008	2022	tags=57%, list=14%, signal=66%
Reactome	REACTOME_REGULATION_OF_ORNITHINE_DECARBOXYLASE_ODC	Regulation Of Ornithine Decarboxylase Odc	36	0.6302	2.0412	0	0.000442841	0.018	4302	tags=75%, list=29%, signal=106%
WikiPathways	WP_SELENIUM_MICRONUTRIENT_NETWORK	Selenium Micronutrient Network	52	0.5852	2.0354	0	0.00135597	0.008	2172	tags=38%, list=15%, signal=45%
Reactome	REACTOME_ACTIVATION_OF_NF_KAPPAB_IN_B_CELLS	Activation Of Nf Kappab In B Cells	52	0.5867	2.0259	0	0.000647816	0.027	4302	tags=65%, list=29%, signal=92%
Reactome	REACTOME_SCF_BETA_TRCP_MEDIATED_DEGRADATION_OF_EMI1	Scf Beta Trcp Mediated Degradation Of Emi1	41	0.6043	2.0251	0	0.000633093	0.027	4302	tags=73%, list=29%, signal=103%
Reactome	REACTOME_B_WICH_COMPLEX_POSITIVELY_REGULATES_RRNA_EXPRESSION	B Wich Complex Positively Regulates Rrna Expression	76	0.5542	2.0242	0	0.000619024	0.027	3563	tags=64%, list=24%, signal=85%
Reactome	REACTOME_DEGRADATION_OF_DVL	Degradation Of Dvl	43	0.6056	2.0223	0	0.000605567	0.027	4065	tags=72%, list=28%, signal=99%
WikiPathways	WP_GLYCOLYSIS_AND_GLUCONEOGENESIS	Glycolysis And Gluconeogenesis	31	0.638	2.0182	0	0.00145515	0.01	3508	tags=52%, list=24%, signal=68%
Reactome	REACTOME_SOMITOGENESIS	Somitogenesis	38	0.6121	2.0171	0	0.000658499	0.03	4050	tags=74%, list=27%, signal=101%
Reactome	REACTOME_DNA_REPLICATION	Dna Replication	168	0.5112	2.0162	0	0.00064478	0.03	3955	tags=54%, list=27%, signal=72%
Reactome	REACTOME_DEGRADATION_OF_AXIN	Degradation Of Axin	41	0.5938	2.0093	0	0.000757497	0.036	4050	tags=68%, list=27%, signal=94%
Reactome	REACTOME_RMTS_METHYLATE_HISTONE_ARGININES	Rmts Methylate Histone Arginines	65	0.5629	2.007	0	0.000762973	0.037	3432	tags=62%, list=23%, signal=80%
Reactome	REACTOME_ARACHIDONATE_METABOLISM	Arachidonate Metabolism	27	0.643	1.9993	0	0.000768312	0.038	885	tags=37%, list=6%, signal=39%
Reactome	REACTOME_RNA_POLYMERASE_I_TRANSCRIPTION	Rna Polymerase I Transcription	91	0.5276	1.9946	0	0.00077337	0.039	3899	tags=59%, list=26%, signal=80%
Reactome	REACTOME_THE_ROLE_OF_GTSE1_IN_G2_M_PROGRESSION_AFTER_G2_CHECKPOINT	The Role Of Gtse1 In G2 M Progression After G2 Checkpoint	55	0.5601	1.9942	0	0.000758778	0.039	4050	tags=65%, list=27%, signal=90%
Reactome	REACTOME_UBIQUITIN_MEDIATED_DEGRADATION_OF_PHOSPHORYLATED_CDC25A	Ubiquitin Mediated Degradation Of Phosphorylated Cdc25A	49	0.5793	1.9937	0	0.000744726	0.039	4050	tags=61%, list=27%, signal=84%
Reactome	REACTOME_SPOP_MEDIATED_PROTEASOMAL_DEGRADATION_OF_PD_L1_CD274	Spop Mediated Proteasomal Degradation Of Pd L1 Cd274	44	0.5901	1.9909	0	0.000749984	0.04	4050	tags=66%, list=27%, signal=91%
Reactome	REACTOME_EUKARYOTIC_TRANSLATION_ELONGATION	Eukaryotic Translation Elongation	83	0.5388	1.9898	0	0.000755242	0.04	5370	tags=67%, list=36%, signal=105%
Reactome	REACTOME_CELLULAR_RESPONSE_TO_CHEMICAL_STRESS	Cellular Response To Chemical Stress	162	0.5035	1.9873	0	0.000741992	0.04	3639	tags=51%, list=25%, signal=66%
Reactome	REACTOME_NFE2L2_REGULATING_ANTI_OXIDANT_DETOXIFICATION_ENZYMES	Nfe2L2 Regulating Anti Oxidant Detoxification Enzymes	17	0.7206	1.9855	0	0.000765441	0.042	2104	tags=59%, list=14%, signal=69%
Reactome	REACTOME_REGULATION_OF_APOPTOSIS	Regulation Of Apoptosis	39	0.5989	1.9817	0	0.000787712	0.044	4302	tags=72%, list=29%, signal=101%
Reactome	REACTOME_HH_MUTANTS_ABROGATE_LIGAND_SECRETION	Hh Mutants Abrogate Ligand Secretion	42	0.5888	1.9784	0	0.000774584	0.044	5028	tags=79%, list=34%, signal=119%
Reactome	REACTOME_MITOCHONDRIAL_TRANSLATION_ELONGATION	Mitochondrial Translation Elongation	85	0.5262	1.9767	0	0.000778646	0.045	5347	tags=64%, list=36%, signal=99%
Reactome	REACTOME_RIBOSOME_QUALITY_CONTROL_RQC_COMPLEX_EXTRACTS_AND_DEGRADES_NASCENT_PEPTIDE	Ribosome Quality Control Rqc Complex Extracts And Degrades Nascent Peptide	98	0.5244	1.9726	0	0.000832903	0.049	4859	tags=63%, list=33%, signal=94%
Reactome	REACTOME_NEGATIVE_REGULATION_OF_NOTCH4_SIGNALING	Negative Regulation Of Notch4 Signaling	42	0.5898	1.9711	0	0.00088563	0.052	4050	tags=67%, list=27%, signal=92%
WikiPathways	WP_PROTEASOME_DEGRADATION	Proteasome Degradation	52	0.5709	1.9709	0.00118203	0.00292707	0.023	4152	tags=63%, list=28%, signal=88%
Reactome	REACTOME_HEDGEHOG_LIGAND_BIOGENESIS	Hedgehog Ligand Biogenesis	46	0.5853	1.9623	0	0.00098454	0.059	5028	tags=78%, list=34%, signal=118%
Reactome	REACTOME_PROTEASOME_ASSEMBLY	Proteasome Assembly	47	0.5754	1.9622	0	0.000969393	0.059	4859	tags=74%, list=33%, signal=111%
Reactome	REACTOME_INSERTION_OF_TAIL_ANCHORED_PROTEINS_INTO_THE_ENDOPLASMIC_RETICULUM_MEMBRANE	Insertion Of Tail Anchored Proteins Into The Endoplasmic Reticulum Membrane	20	0.6894	1.9584	0	0.00103265	0.064	2454	tags=50%, list=17%, signal=60%
Reactome	REACTOME_HATS_ACETYLATE_HISTONES	Hats Acetylate Histones	127	0.5101	1.9583	0	0.00101724	0.064	3301	tags=49%, list=22%, signal=62%
Reactome	REACTOME_FBXL7_DOWN_REGULATES_AURKA_DURING_MITOTIC_ENTRY_AND_IN_EARLY_MITOSIS	Fbxl7 Down Regulates Aurka During Mitotic Entry And In Early Mitosis	41	0.5845	1.9566	0	0.00103267	0.066	4050	tags=68%, list=27%, signal=94%
Reactome	REACTOME_ABC_TRANSPORTER_DISORDERS	Abc Transporter Disorders	52	0.5626	1.9507	0	0.00106273	0.069	4050	tags=63%, list=27%, signal=87%
Reactome	REACTOME_ACTIVATION_OF_ANTERIOR_HOX_GENES_IN_HINDBRAIN_DEVELOPMENT_DURING_EARLY_EMBRYOGENESIS	Activation Of Anterior Hox Genes In Hindbrain Development During Early Embryogenesis	104	0.5051	1.9474	0	0.00114994	0.075	4248	tags=60%, list=29%, signal=83%
WikiPathways	WP_IL18_SIGNALING	Il18 Signaling	194	0.4817	1.9352	0	0.00576476	0.051	2846	tags=40%, list=19%, signal=49%
Reactome	REACTOME_AUF1_HNRNP_D0_BINDS_AND_DESTABILIZES_MRNA	Auf1 Hnrnp D0 Binds And Destabilizes Mrna	40	0.5854	1.9348	0	0.00132188	0.087	4050	tags=70%, list=27%, signal=96%
Reactome	REACTOME_METABOLISM_OF_POLYAMINES	Metabolism Of Polyamines	43	0.5781	1.93	0	0.00138968	0.093	4474	tags=70%, list=30%, signal=100%
WikiPathways	WP_22Q112_COPY_NUMBER_VARIATION_SYNDROME	22Q112 Copy Number Variation Syndrome	81	0.5177	1.9282	0	0.00569499	0.056	3717	tags=51%, list=25%, signal=67%
Reactome	REACTOME_AGGREPHAGY	Aggrephagy	32	0.604	1.9261	0	0.00145559	0.098	3127	tags=47%, list=21%, signal=59%
Hallmarks	HALLMARK_P53_PATHWAY	P53 Pathway	169	0.4812	1.926	0	0.000919897	0.004	3195	tags=39%, list=22%, signal=49%
WikiPathways	WP_FERROPTOSIS	Ferroptosis	53	0.5518	1.9251	0	0.00545368	0.059	868	tags=28%, list=6%, signal=30%
Reactome	REACTOME_FORMATION_OF_THE_BETA_CATENIN_TCF_TRANSACTIVATING_COMPLEX	Formation Of The Beta Catenin Tcf Transactivating Complex	76	0.5216	1.9225	0	0.00154716	0.105	4248	tags=66%, list=29%, signal=92%
Reactome	REACTOME_BILE_ACID_AND_BILE_SALT_METABOLISM	Bile Acid And Bile Salt Metabolism	22	0.6573	1.9196	0	0.00167796	0.115	431	tags=32%, list=3%, signal=33%
WikiPathways	WP_GLYCEROL_METABOLISM_INCLUDING_LINKED_IMDS	Glycerol Metabolism Including Linked Imds	19	0.6788	1.9157	0	0.00609864	0.072	3445	tags=74%, list=23%, signal=96%
WikiPathways	WP_CYTOPLASMIC_RIBOSOMAL_PROTEINS	Cytoplasmic Ribosomal Proteins	80	0.5202	1.9116	0	0.00634388	0.08	5370	tags=68%, list=36%, signal=106%
Reactome	REACTOME_OXIDATIVE_STRESS_INDUCED_SENESCENCE	Oxidative Stress Induced Senescence	108	0.4953	1.9103	0	0.00190092	0.131	3899	tags=56%, list=26%, signal=76%
Reactome	REACTOME_RESPONSE_OF_EIF2AK4_GCN2_TO_AMINO_ACID_DEFICIENCY	Response Of Eif2Ak4 Gcn2 To Amino Acid Deficiency	93	0.5083	1.9088	0	0.00188964	0.132	5370	tags=63%, list=36%, signal=99%
Reactome	REACTOME_CELLULAR_RESPONSE_TO_HYPOXIA	Cellular Response To Hypoxia	57	0.5356	1.9047	0	0.00202315	0.143	4050	tags=56%, list=27%, signal=77%
Reactome	REACTOME_GSK3B_MEDIATED_PROTEASOMAL_DEGRADATION_OF_PD_L1_CD274	Gsk3B Mediated Proteasomal Degradation Of Pd L1 Cd274	42	0.5728	1.9021	0	0.0020629	0.146	5126	tags=79%, list=35%, signal=120%
WikiPathways	WP_7Q1123_DISTAL_COPY_NUMBER_VARIATION	7Q1123 Distal Copy Number Variation	17	0.6828	1.8998	0	0.00720083	0.097	3508	tags=71%, list=24%, signal=92%
Reactome	REACTOME_SCF_SKP2_MEDIATED_DEGRADATION_OF_P27_P21	Scf Skp2 Mediated Degradation Of P27 P21	47	0.5634	1.8998	0	0.00215306	0.151	4050	tags=66%, list=27%, signal=91%
Reactome	REACTOME_INTERLEUKIN_1_SIGNALING	Interleukin 1 Signaling	91	0.5069	1.8979	0	0.00220364	0.156	4050	tags=53%, list=27%, signal=72%
Reactome	REACTOME_SEALING_OF_THE_NUCLEAR_ENVELOPE_NE_BY_ESCRT_III	Sealing Of The Nuclear Envelope Ne By Escrt Iii	22	0.6509	1.8968	0.00133869	0.00217677	0.156	3775	tags=68%, list=26%, signal=91%
Hallmarks	HALLMARK_MYOGENESIS	Myogenesis	122	0.4884	1.8962	0	0.000735917	0.004	3144	tags=45%, list=21%, signal=57%
Reactome	REACTOME_REGULATION_OF_RUNX3_EXPRESSION_AND_ACTIVITY	Regulation Of Runx3 Expression And Activity	44	0.564	1.8934	0	0.00221237	0.161	4050	tags=64%, list=27%, signal=87%
Reactome	REACTOME_DNA_DAMAGE_TELOMERE_STRESS_INDUCED_SENESCENCE	Dna Damage Telomere Stress Induced Senescence	66	0.5259	1.8929	0	0.00219821	0.162	4250	tags=65%, list=29%, signal=91%
Reactome	REACTOME_UB_SPECIFIC_PROCESSING_PROTEASES	Ub Specific Processing Proteases	166	0.4692	1.8924	0	0.00219685	0.164	3937	tags=48%, list=27%, signal=65%
Reactome	REACTOME_CELLULAR_RESPONSE_TO_STARVATION	Cellular Response To Starvation	141	0.4785	1.8924	0	0.00217131	0.164	4903	tags=56%, list=33%, signal=83%
Reactome	REACTOME_ANTIGEN_PROCESSING_CROSS_PRESENTATION	Antigen Processing Cross Presentation	74	0.5292	1.8913	0	0.00217033	0.166	4377	tags=59%, list=30%, signal=84%
WikiPathways	WP_EBSTEINBARR_VIRUS_LMP1_SIGNALING	Ebsteinbarr Virus Lmp1 Signaling	20	0.6569	1.8912	0	0.0075241	0.106	3120	tags=55%, list=21%, signal=70%
Reactome	REACTOME_DNA_DOUBLE_STRAND_BREAK_RESPONSE	Dna Double Strand Break Response	67	0.5303	1.891	0	0.00215752	0.167	3563	tags=52%, list=24%, signal=69%
Reactome	REACTOME_REGULATION_OF_EXPRESSION_OF_SLITS_AND_ROBOS	Regulation Of Expression Of Slits And Robos	144	0.4765	1.8879	0	0.00222589	0.175	5182	tags=61%, list=35%, signal=93%
Reactome	REACTOME_INTERLEUKIN_10_SIGNALING	Interleukin 10 Signaling	20	0.6443	1.8857	0.0013587	0.00231492	0.183	3668	tags=70%, list=25%, signal=93%
Reactome	REACTOME_POSITIVE_EPIGENETIC_REGULATION_OF_RRNA_EXPRESSION	Positive Epigenetic Regulation Of Rrna Expression	89	0.4993	1.8844	0	0.0023123	0.185	3563	tags=56%, list=24%, signal=74%
Reactome	REACTOME_GLUCONEOGENESIS	Gluconeogenesis	17	0.6859	1.882	0	0.00238774	0.193	2918	tags=76%, list=20%, signal=95%
Reactome	REACTOME_RESPIRATORY_ELECTRON_TRANSPORT	Respiratory Electron Transport	136	0.4802	1.8814	0	0.00239527	0.194	5772	tags=63%, list=39%, signal=103%
WikiPathways	WP_TNFRELATED_WEAK_INDUCER_OF_APOPTOSIS_TWEAK_SIGNALING	Tnfrelated Weak Inducer Of Apoptosis Tweak Signaling	39	0.5713	1.8795	0	0.00870891	0.131	1763	tags=36%, list=12%, signal=41%
Reactome	REACTOME_REPRODUCTION	Reproduction	102	0.4866	1.879	0	0.00246863	0.202	3912	tags=53%, list=27%, signal=72%
Reactome	REACTOME_DEGRADATION_OF_GLI1_BY_THE_PROTEASOME	Degradation Of Gli1 By The Proteasome	44	0.5531	1.878	0.00122399	0.002475	0.204	4050	tags=61%, list=27%, signal=84%
Reactome	REACTOME_METABOLISM_OF_PORPHYRINS	Metabolism Of Porphyrins	18	0.6642	1.8771	0	0.00251428	0.21	3630	tags=61%, list=25%, signal=81%
WikiPathways	WP_ARYL_HYDROCARBON_RECEPTOR_PATHWAY_WP2873	Aryl Hydrocarbon Receptor Pathway Wp2873	27	0.6145	1.8759	0	0.00885999	0.141	2284	tags=44%, list=15%, signal=52%
Reactome	REACTOME_LYSOSOME_VESICLE_BIOGENESIS	Lysosome Vesicle Biogenesis	30	0.5976	1.8726	0	0.00264784	0.221	3230	tags=53%, list=22%, signal=68%
WikiPathways	WP_FGFR3_SIGNALING_IN_CHONDROCYTE_PROLIFERATION_AND_TERMINAL_DIFFERENTIATION	Fgfr3 Signaling In Chondrocyte Proliferation And Terminal Differentiation	19	0.6468	1.8721	0	0.00870505	0.147	2285	tags=42%, list=15%, signal=50%
Reactome	REACTOME_TNFR1_INDUCED_PROAPOPTOTIC_SIGNALING	Tnfr1 Induced Proapoptotic Signaling	24	0.6206	1.8684	0.00135318	0.00277912	0.235	2206	tags=46%, list=15%, signal=54%
Reactome	REACTOME_MITOCHONDRIAL_TRANSLATION	Mitochondrial Translation	96	0.4907	1.8652	0	0.00291752	0.248	5347	tags=57%, list=36%, signal=89%
Reactome	REACTOME_TELOMERE_MAINTENANCE	Telomere Maintenance	95	0.4946	1.8641	0	0.0029498	0.254	3899	tags=54%, list=26%, signal=72%
WikiPathways	WP_CATABOLISM_OF_SKELETAL_MUSCLE_IN_CACHEXIA	Catabolism Of Skeletal Muscle In Cachexia	36	0.5565	1.8569	0	0.00981204	0.165	1957	tags=42%, list=13%, signal=48%
Reactome	REACTOME_ORC1_REMOVAL_FROM_CHROMATIN	Orc1 Removal From Chromatin	56	0.528	1.8541	0	0.00325653	0.277	4050	tags=59%, list=27%, signal=81%
WikiPathways	WP_FOLLICLE_STIMULATING_HORMONE_FSH_SIGNALING	Follicle Stimulating Hormone Fsh Signaling	22	0.6318	1.8536	0	0.00977949	0.173	1307	tags=41%, list=9%, signal=45%
Reactome	REACTOME_SARS_COV_2_MODULATES_HOST_TRANSLATION_MACHINERY	Sars Cov 2 Modulates Host Translation Machinery	44	0.547	1.8509	0	0.00339568	0.287	4903	tags=61%, list=33%, signal=92%
Reactome	REACTOME_STABILIZATION_OF_P53	Stabilization Of P53	43	0.5507	1.8496	0	0.00341276	0.289	4050	tags=63%, list=27%, signal=86%
Reactome	REACTOME_COMPLEX_I_BIOGENESIS	Complex I Biogenesis	58	0.5264	1.8445	0	0.00370725	0.314	5772	tags=66%, list=39%, signal=107%
WikiPathways	WP_OXIDATIVE_PHOSPHORYLATION	Oxidative Phosphorylation	47	0.5396	1.843	0	0.0108222	0.197	4921	tags=60%, list=33%, signal=89%
Reactome	REACTOME_POST_CHAPERONIN_TUBULIN_FOLDING_PATHWAY	Post Chaperonin Tubulin Folding Pathway	16	0.6623	1.8396	0.00270636	0.00395652	0.331	3278	tags=69%, list=22%, signal=88%
Reactome	REACTOME_HDMS_DEMETHYLATE_HISTONES	Hdms Demethylate Histones	42	0.5509	1.8386	0	0.00399616	0.337	3432	tags=57%, list=23%, signal=74%
Reactome	REACTOME_REGULATION_OF_CDH1_FUNCTION	Regulation Of Cdh1 Function	56	0.5165	1.834	0.00117233	0.00415057	0.349	4050	tags=64%, list=27%, signal=88%
Reactome	REACTOME_UCH_PROTEINASES	Uch Proteinases	81	0.4985	1.8339	0	0.00412167	0.35	4050	tags=57%, list=27%, signal=78%
Reactome	REACTOME_REGULATION_OF_PD_L1_CD274_TRANSCRIPTION	Regulation Of Pd L1 Cd274 Transcription	84	0.4942	1.8291	0	0.00432901	0.367	4291	tags=62%, list=29%, signal=87%
Reactome	REACTOME_REGULATION_OF_PTEN_STABILITY_AND_ACTIVITY	Regulation Of Pten Stability And Activity	51	0.529	1.829	0	0.00428966	0.367	4050	tags=61%, list=27%, signal=83%
Reactome	REACTOME_SELENOAMINO_ACID_METABOLISM	Selenoamino Acid Metabolism	105	0.4775	1.8278	0	0.00432528	0.374	5774	tags=64%, list=39%, signal=104%
WikiPathways	WP_OMEGA6FATTY_ACIDS_IN_SENESCENCE	Omega6Fatty Acids In Senescence	31	0.5748	1.8245	0.00126263	0.0140284	0.256	1810	tags=39%, list=12%, signal=44%
Reactome	REACTOME_TNF_SIGNALING	Tnf Signaling	54	0.5164	1.8125	0.0011976	0.0053378	0.443	3148	tags=43%, list=21%, signal=54%
WikiPathways	WP_BURN_WOUND_HEALING	Burn Wound Healing	74	0.4987	1.8121	0.00110742	0.0164189	0.307	2027	tags=34%, list=14%, signal=39%
Reactome	REACTOME_PRE_NOTCH_EXPRESSION_AND_PROCESSING	Pre Notch Expression And Processing	94	0.4813	1.812	0	0.00532661	0.445	3563	tags=55%, list=24%, signal=72%
Reactome	REACTOME_REGULATION_OF_ENDOGENOUS_RETROELEMENTS_BY_KRAB_ZFP_PROTEINS	Regulation Of Endogenous Retroelements By Krab Zfp Proteins	91	0.482	1.8096	0	0.00549664	0.46	4220	tags=55%, list=29%, signal=76%
Reactome	REACTOME_PHASE_I_FUNCTIONALIZATION_OF_COMPOUNDS	Phase I Functionalization Of Compounds	49	0.5318	1.8065	0	0.00573569	0.474	2109	tags=37%, list=14%, signal=43%
WikiPathways	WP_INHIBITORS_OF_METABOLISM_IN_MELANOMA_THERAPY	Inhibitors Of Metabolism In Melanoma Therapy	34	0.5589	1.8064	0	0.0170366	0.33	2373	tags=41%, list=16%, signal=49%
Reactome	REACTOME_ENDOSOMAL_SORTING_COMPLEX_REQUIRED_FOR_TRANSPORT_ESCRT	Endosomal Sorting Complex Required For Transport Escrt	29	0.5836	1.8057	0.00126103	0.00580168	0.478	4442	tags=59%, list=30%, signal=84%
WikiPathways	WP_TRANSCRIPTION_ACTIVATION_RNAPOLYMERASE_I_AND_KAT2AB_AND_INHIBITION_NURD_COMPLEX	Transcription Activation Rnapolymerase I And Kat2Ab And Inhibition Nurd Complex	69	0.4997	1.8006	0	0.0180695	0.359	4152	tags=58%, list=28%, signal=80%
Hallmarks	HALLMARK_HYPOXIA	Hypoxia	159	0.4547	1.7986	0	0.00166596	0.011	3487	tags=44%, list=24%, signal=57%
WikiPathways	WP_TLR4_SIGNALING_AND_TOLERANCE	Tlr4 Signaling And Tolerance	21	0.6145	1.7984	0.00134048	0.0178071	0.365	1146	tags=33%, list=8%, signal=36%
Reactome	REACTOME_MEIOTIC_SYNAPSIS	Meiotic Synapsis	58	0.5067	1.7976	0	0.00658191	0.531	3912	tags=62%, list=27%, signal=84%
Reactome	REACTOME_AMPK_INDUCED_ERAD_AND_LYSOSOME_MEDIATED_DEGRADATION_OF_PD_L1_CD274	Ampk Induced Erad And Lysosome Mediated Degradation Of Pd L1 Cd274	50	0.531	1.7965	0	0.0066402	0.538	4859	tags=66%, list=33%, signal=98%
WikiPathways	WP_METABOLIC_REPROGRAMMING_IN_COLON_CANCER	Metabolic Reprogramming In Colon Cancer	40	0.5404	1.7957	0	0.0180077	0.382	2859	tags=45%, list=19%, signal=56%
Reactome	REACTOME_REGULATION_OF_INSULIN_LIKE_GROWTH_FACTOR_IGF_TRANSPORT_AND_UPTAKE_BY_INSULIN_LIKE_GROWTH_FACTOR_BINDING_PROTEINS_IGFBPS	Regulation Of Insulin Like Growth Factor Igf Transport And Uptake By Insulin Like Growth Factor Binding Proteins Igfbps	70	0.4969	1.7935	0	0.0067844	0.547	2085	tags=39%, list=14%, signal=45%
Reactome	REACTOME_CDK_MEDIATED_PHOSPHORYLATION_AND_REMOVAL_OF_CDC6	Cdk Mediated Phosphorylation And Removal Of Cdc6	58	0.5052	1.7914	0	0.0068562	0.552	4890	tags=66%, list=33%, signal=98%
WikiPathways	WP_ELECTRON_TRANSPORT_CHAIN_OXPHOS_SYSTEM_IN_MITOCHONDRIA	Electron Transport Chain Oxphos System In Mitochondria	83	0.4866	1.7888	0	0.0188972	0.406	5765	tags=65%, list=39%, signal=106%
WikiPathways	WP_MITOCHONDRIAL_COMPLEX_I_ASSEMBLY_MODEL_OXPHOS_SYSTEM	Mitochondrial Complex I Assembly Model Oxphos System	48	0.523	1.7886	0.00120337	0.0183148	0.408	4921	tags=56%, list=33%, signal=84%
Reactome	REACTOME_REGULATED_NECROSIS	Regulated Necrosis	46	0.525	1.786	0.00124688	0.00735249	0.581	3127	tags=43%, list=21%, signal=55%
Reactome	REACTOME_RECYCLING_PATHWAY_OF_L1	Recycling Pathway Of L1	37	0.5381	1.7825	0	0.00768104	0.603	2962	tags=51%, list=20%, signal=64%
WikiPathways	WP_LUNG_FIBROSIS	Lung Fibrosis	34	0.5524	1.7818	0.00253807	0.0193387	0.433	3005	tags=50%, list=20%, signal=63%
Reactome	REACTOME_DETOXIFICATION_OF_REACTIVE_OXYGEN_SPECIES	Detoxification Of Reactive Oxygen Species	25	0.5865	1.7802	0.00131926	0.00781055	0.61	2174	tags=52%, list=15%, signal=61%
Reactome	REACTOME_MEIOSIS	Meiosis	92	0.4706	1.7795	0.00109409	0.0078727	0.617	3912	tags=54%, list=27%, signal=73%
Reactome	REACTOME_RUNX1_REGULATES_GENES_INVOLVED_IN_MEGAKARYOCYTE_DIFFERENTIATION_AND_PLATELET_FUNCTION	Runx1 Regulates Genes Involved In Megakaryocyte Differentiation And Platelet Function	74	0.4868	1.7793	0	0.00781786	0.618	4248	tags=65%, list=29%, signal=91%
Reactome	REACTOME_HEDGEHOG_ON_STATE	Hedgehog On State	64	0.4968	1.7788	0.00116144	0.0078046	0.622	4050	tags=55%, list=27%, signal=75%
Reactome	REACTOME_ANTIGEN_PROCESSING_UB_ATP_INDEPENDENT_PROTEASOMAL_DEGRADATION	Antigen Processing Ub Atp Independent Proteasomal Degradation	16	0.6706	1.778	0.00284091	0.00777542	0.624	4050	tags=88%, list=27%, signal=120%
WikiPathways	WP_CANNABINOID_RECEPTOR_SIGNALING	Cannabinoid Receptor Signaling	19	0.6324	1.775	0.00558659	0.0204543	0.464	1266	tags=37%, list=9%, signal=40%
Reactome	REACTOME_FCERI_MEDIATED_NF_KB_ACTIVATION	Fceri Mediated Nf Kb Activation	61	0.4989	1.7747	0.00117371	0.00808414	0.64	4302	tags=56%, list=29%, signal=78%
Reactome	REACTOME_ASYMMETRIC_LOCALIZATION_OF_PCP_PROTEINS	Asymmetric Localization Of Pcp Proteins	46	0.5247	1.7725	0	0.00825215	0.649	4050	tags=61%, list=27%, signal=84%
Reactome	REACTOME_REGULATION_OF_PD_L1_CD274_EXPRESSION	Regulation Of Pd L1 Cd274 Expression	170	0.4459	1.771	0	0.00829986	0.658	4302	tags=52%, list=29%, signal=72%
WikiPathways	WP_MITOCHONDRIAL_COMPLEX_IV_ASSEMBLY	Mitochondrial Complex Iv Assembly	31	0.5633	1.7686	0.0012837	0.0211544	0.485	5097	tags=71%, list=35%, signal=108%
WikiPathways	WP_TOLLLIKE_RECEPTOR_SIGNALING	Tolllike Receptor Signaling	59	0.5035	1.7681	0	0.0206969	0.487	2819	tags=41%, list=19%, signal=50%
WikiPathways	WP_UTERINE_NATURAL_KILLER_CELLS_AND_PROGESTERONE_ESTROGEN_AND_CHORIONIC_GONADOTROPIN	Uterine Natural Killer Cells And Progesterone Estrogen And Chorionic Gonadotropin	22	0.6067	1.7644	0.00132802	0.0212218	0.506	1317	tags=36%, list=9%, signal=40%
Reactome	REACTOME_DEGRADATION_OF_CRY_AND_PER_PROTEINS	Degradation Of Cry And Per Proteins	47	0.5177	1.764	0.00238379	0.00910297	0.696	4050	tags=60%, list=27%, signal=82%
Reactome	REACTOME_PYROPTOSIS	Pyroptosis	19	0.623	1.7635	0	0.00912782	0.7	3775	tags=58%, list=26%, signal=78%
Reactome	REACTOME_CO_INHIBITION_BY_PD_1	Co Inhibition By Pd 1	172	0.4443	1.763	0	0.00910558	0.702	4302	tags=52%, list=29%, signal=72%
Reactome	REACTOME_GLUTATHIONE_CONJUGATION	Glutathione Conjugation	23	0.592	1.7616	0.00268817	0.00917041	0.706	4817	tags=70%, list=33%, signal=103%
Reactome	REACTOME_COMPLEX_IV_ASSEMBLY	Complex Iv Assembly	39	0.5331	1.7613	0.00124069	0.00914109	0.708	5097	tags=62%, list=35%, signal=94%
Reactome	REACTOME_REGULATION_OF_HOMOTYPIC_CELL_CELL_ADHESION	Regulation Of Homotypic Cell Cell Adhesion	188	0.4383	1.7609	0	0.00912718	0.709	3987	tags=53%, list=27%, signal=71%
Hallmarks	HALLMARK_UV_RESPONSE_UP	Uv Response Up	128	0.4491	1.7582	0	0.00233942	0.018	2907	tags=37%, list=20%, signal=45%
Reactome	REACTOME_PCP_CE_PATHWAY	Pcp Ce Pathway	68	0.4803	1.7566	0	0.00955837	0.728	4065	tags=57%, list=28%, signal=79%
Reactome	REACTOME_TNFR1_INDUCED_NF_KAPPA_B_SIGNALING_PATHWAY	Tnfr1 Induced Nf Kappa B Signaling Pathway	32	0.5551	1.7549	0.00130548	0.00966153	0.736	3127	tags=47%, list=21%, signal=59%
WikiPathways	WP_TNFALPHA_SIGNALING	Tnfalpha Signaling	82	0.4727	1.7546	0.00112994	0.023253	0.552	3228	tags=40%, list=22%, signal=51%
Reactome	REACTOME_FORMATION_OF_PARAXIAL_MESODERM	Formation Of Paraxial Mesoderm	48	0.516	1.7542	0	0.00973321	0.744	4050	tags=60%, list=27%, signal=83%
WikiPathways	WP_BEMPEDOIC_ACID_THERAPY_IN_ATHEROSCLEROSIS_AND_METABOLIC_SYNDROME	Bempedoic Acid Therapy In Atherosclerosis And Metabolic Syndrome	20	0.6095	1.7503	0.00684931	0.0242138	0.578	613	tags=25%, list=4%, signal=26%
WikiPathways	WP_NUCLEAR_RECEPTORS_METAPATHWAY	Nuclear Receptors Metapathway	198	0.4298	1.7482	0	0.0244349	0.593	1911	tags=30%, list=13%, signal=34%
Reactome	REACTOME_CLEC7A_DECTIN_1_SIGNALING	Clec7A Dectin 1 Signaling	81	0.4702	1.7441	0	0.010945	0.793	4302	tags=49%, list=29%, signal=69%
Reactome	REACTOME_NONHOMOLOGOUS_END_JOINING_NHEJ	Nonhomologous End Joining Nhej	58	0.4918	1.742	0	0.0112186	0.805	3563	tags=50%, list=24%, signal=66%
Reactome	REACTOME_FORMATION_OF_THE_CORNIFIED_ENVELOPE	Formation Of The Cornified Envelope	20	0.594	1.7412	0.0069541	0.011299	0.81	1503	tags=45%, list=10%, signal=50%
WikiPathways	WP_2Q37_COPY_NUMBER_VARIATION_SYNDROME	2Q37 Copy Number Variation Syndrome	84	0.4634	1.7377	0	0.0270801	0.637	2402	tags=32%, list=16%, signal=38%
Reactome	REACTOME_PROTEIN_LOCALIZATION	Protein Localization	143	0.443	1.7375	0	0.0117833	0.821	3460	tags=33%, list=23%, signal=43%
WikiPathways	WP_MIRNA_ROLE_IN_IMMUNE_RESPONSE_IN_SEPSIS	Mirna Role In Immune Response In Sepsis	26	0.5688	1.735	0.00125945	0.027225	0.647	1067	tags=31%, list=7%, signal=33%
Reactome	REACTOME_P53_DEPENDENT_G1_DNA_DAMAGE_RESPONSE	P53 Dependent G1 Dna Damage Response	50	0.5043	1.7339	0.00118483	0.0121807	0.833	4050	tags=58%, list=27%, signal=80%
Reactome	REACTOME_SIGNALING_BY_NOTCH	Signaling By Notch	193	0.4308	1.7285	0	0.013006	0.851	4050	tags=52%, list=27%, signal=71%
Reactome	REACTOME_CYTOCHROME_P450_ARRANGED_BY_SUBSTRATE_TYPE	Cytochrome P450 Arranged By Substrate Type	25	0.5734	1.7285	0.00536913	0.0129169	0.851	2109	tags=44%, list=14%, signal=51%
WikiPathways	WP_THYMIC_STROMAL_LYMPHOPOIETIN_TSLP_SIGNALING	Thymic Stromal Lymphopoietin Tslp Signaling	37	0.5342	1.7275	0.00498132	0.0294751	0.687	1327	tags=30%, list=9%, signal=33%
WikiPathways	WP_METAPATHWAY_BIOTRANSFORMATION_PHASE_I_AND_II	Metapathway Biotransformation Phase I And Ii	79	0.4737	1.7262	0	0.0292493	0.698	3540	tags=46%, list=24%, signal=60%
Reactome	REACTOME_BUDDING_AND_MATURATION_OF_HIV_VIRION	Budding And Maturation Of Hiv Virion	26	0.5644	1.7262	0.0052356	0.0131364	0.854	3775	tags=50%, list=26%, signal=67%
Reactome	REACTOME_DOWNSTREAM_TCR_SIGNALING	Downstream Tcr Signaling	61	0.4807	1.7246	0.00348837	0.0132987	0.859	4302	tags=52%, list=29%, signal=74%
Reactome	REACTOME_DEPOSITION_OF_NEW_CENPA_CONTAINING_NUCLEOSOMES_AT_THE_CENTROMERE	Deposition Of New Cenpa Containing Nucleosomes At The Centromere	61	0.4857	1.7244	0.00116279	0.0132235	0.859	4152	tags=61%, list=28%, signal=84%
WikiPathways	WP_PROSTAGLANDIN_SIGNALING	Prostaglandin Signaling	15	0.6476	1.7233	0.0069735	0.0296704	0.716	1879	tags=53%, list=13%, signal=61%
Reactome	REACTOME_CELL_JUNCTION_ORGANIZATION	Cell Junction Organization	233	0.4241	1.7222	0	0.013601	0.864	3937	tags=50%, list=27%, signal=67%
WikiPathways	WP_NOVEL_INTRACELLULAR_COMPONENTS_OF_RIGILIKE_RECEPTOR_PATHWAY	Novel Intracellular Components Of Rigilike Receptor Pathway	46	0.5066	1.7221	0.00120773	0.0294339	0.721	2452	tags=33%, list=17%, signal=39%
Reactome	REACTOME_HEDGEHOG_OFF_STATE	Hedgehog Off State	88	0.4611	1.7216	0	0.0136269	0.867	3639	tags=48%, list=25%, signal=63%
Reactome	REACTOME_REGULATION_OF_MRNA_STABILITY_BY_PROTEINS_THAT_BIND_AU_RICH_ELEMENTS	Regulation Of Mrna Stability By Proteins That Bind Au Rich Elements	70	0.4729	1.7207	0.00112613	0.0136931	0.871	4302	tags=53%, list=29%, signal=74%
Reactome	REACTOME_CELLULAR_SENESCENCE	Cellular Senescence	174	0.4317	1.7198	0	0.013786	0.873	3803	tags=47%, list=26%, signal=63%
Reactome	REACTOME_NUCLEOTIDE_SALVAGE	Nucleotide Salvage	19	0.6122	1.7183	0.00139665	0.0138776	0.878	2057	tags=42%, list=14%, signal=49%
Reactome	REACTOME_TRANSLATION	Translation	336	0.4131	1.7181	0	0.0138144	0.878	5260	tags=52%, list=36%, signal=79%
Hallmarks	HALLMARK_APICAL_JUNCTION	Apical Junction	129	0.4382	1.7178	0	0.00316718	0.027	2858	tags=40%, list=19%, signal=49%
Reactome	REACTOME_G1_S_DNA_DAMAGE_CHECKPOINTS	G1 S Dna Damage Checkpoints	63	0.4783	1.7177	0	0.0137857	0.878	4050	tags=51%, list=27%, signal=70%
Reactome	REACTOME_SWITCHING_OF_ORIGINS_TO_A_POST_REPLICATIVE_STATE	Switching Of Origins To A Post Replicative State	77	0.4676	1.716	0	0.0139537	0.882	4970	tags=60%, list=34%, signal=90%
WikiPathways	WP_OXIDATION_BY_CYTOCHROME_P450	Oxidation By Cytochrome P450	23	0.5783	1.7137	0.00409836	0.0320334	0.764	1668	tags=39%, list=11%, signal=44%
WikiPathways	WP_LDL_INFLUENCE_ON_CD14_AND_TLR4	Ldl Influence On Cd14 And Tlr4	18	0.6011	1.7127	0.0110345	0.0316844	0.767	864	tags=33%, list=6%, signal=35%
WikiPathways	WP_RANKLRANK_SIGNALING	Ranklrank Signaling	50	0.4966	1.7115	0	0.0314167	0.771	1402	tags=30%, list=10%, signal=33%
Reactome	REACTOME_REGULATION_OF_RAS_BY_GAPS	Regulation Of Ras By Gaps	49	0.4964	1.7114	0	0.0147204	0.897	4050	tags=57%, list=27%, signal=79%
Reactome	REACTOME_FORMATION_OF_TUBULIN_FOLDING_INTERMEDIATES_BY_CCT_TRIC	Formation Of Tubulin Folding Intermediates By Cct Tric	19	0.6104	1.7063	0.00417827	0.0155667	0.908	2833	tags=42%, list=19%, signal=52%
WikiPathways	WP_REGULATION_OF_TOLLLIKE_RECEPTOR_SIGNALING	Regulation Of Tolllike Receptor Signaling	93	0.4516	1.7061	0	0.0329573	0.794	1964	tags=32%, list=13%, signal=37%
WikiPathways	WP_BASE_EXCISION_REPAIR	Base Excision Repair	31	0.5413	1.706	0.00907912	0.032292	0.795	3383	tags=45%, list=23%, signal=58%
Reactome	REACTOME_ABORTIVE_ELONGATION_OF_HIV_1_TRANSCRIPT_IN_THE_ABSENCE_OF_TAT	Abortive Elongation Of Hiv 1 Transcript In The Absence Of Tat	22	0.5886	1.7049	0.00809717	0.0156885	0.91	3003	tags=55%, list=20%, signal=68%
Reactome	REACTOME_DENGUE_VIRUS_HOST_INTERACTIONS	Dengue Virus Host Interactions	256	0.4168	1.7044	0	0.0156555	0.911	3344	tags=38%, list=23%, signal=48%
Reactome	REACTOME_INTERLEUKIN_1_FAMILY_SIGNALING	Interleukin 1 Family Signaling	110	0.445	1.7043	0	0.015578	0.911	3937	tags=45%, list=27%, signal=62%
Reactome	REACTOME_RESPONSE_OF_EIF2AK1_HRI_TO_HEME_DEFICIENCY	Response Of Eif2Ak1 Hri To Heme Deficiency	15	0.6331	1.7027	0.00431035	0.0157552	0.917	2168	tags=40%, list=15%, signal=47%
Reactome	REACTOME_DRUG_ADME	Drug Adme	38	0.513	1.7014	0.00371747	0.0158721	0.919	2645	tags=34%, list=18%, signal=42%
Reactome	REACTOME_REGULATION_OF_ENDOGENOUS_RETROELEMENTS	Regulation Of Endogenous Retroelements	121	0.4395	1.7007	0.00106838	0.0159068	0.921	4249	tags=48%, list=29%, signal=67%
WikiPathways	WP_S1P_RECEPTOR_SIGNAL_TRANSDUCTION	S1P Receptor Signal Transduction	22	0.5718	1.6973	0.00665779	0.0350991	0.821	3113	tags=59%, list=21%, signal=75%
Reactome	REACTOME_HIV_ELONGATION_ARREST_AND_RECOVERY	Hiv Elongation Arrest And Recovery	31	0.5358	1.6971	0.00903226	0.0164518	0.934	3003	tags=45%, list=20%, signal=57%
Reactome	REACTOME_KERATINIZATION	Keratinization	20	0.594	1.6968	0.00396825	0.0163776	0.934	1503	tags=45%, list=10%, signal=50%
WikiPathways	WP_HDAC6_INTERACTIONS_IN_THE_CENTRAL_NERVOUS_SYSTEM	Hdac6 Interactions In The Central Nervous System	92	0.4453	1.695	0	0.0355552	0.826	3134	tags=39%, list=21%, signal=49%
Reactome	REACTOME_ADHERENS_JUNCTIONS_INTERACTIONS	Adherens Junctions Interactions	200	0.4221	1.6944	0	0.0168514	0.939	3987	tags=52%, list=27%, signal=70%
Reactome	REACTOME_REGULATION_OF_PD_L1_CD274_POST_TRANSLATIONAL_MODIFICATION	Regulation Of Pd L1 Cd274 Post Translational Modification	78	0.4577	1.6943	0	0.0167517	0.939	5235	tags=59%, list=35%, signal=91%
Reactome	REACTOME_CYCLIN_A_CDK2_ASSOCIATED_EVENTS_AT_S_PHASE_ENTRY	Cyclin A Cdk2 Associated Events At S Phase Entry	70	0.4677	1.6932	0.00112994	0.0168409	0.939	4050	tags=53%, list=27%, signal=73%
Reactome	REACTOME_G2_M_CHECKPOINTS	G2 M Checkpoints	139	0.4298	1.692	0	0.0169046	0.94	4167	tags=46%, list=28%, signal=64%
Reactome	REACTOME_NEF_MEDIATES_DOWN_MODULATION_OF_CELL_SURFACE_RECEPTORS_BY_RECRUITING_THEM_TO_CLATHRIN_ADAPTERS	Nef Mediates Down Modulation Of Cell Surface Receptors By Recruiting Them To Clathrin Adapters	16	0.6284	1.6916	0.0056899	0.0169028	0.941	2962	tags=56%, list=20%, signal=70%
Reactome	REACTOME_HOST_INTERACTIONS_OF_HIV_FACTORS	Host Interactions Of Hiv Factors	108	0.436	1.6895	0	0.0171687	0.946	4050	tags=43%, list=27%, signal=58%
Reactome	REACTOME_MITOTIC_PROPHASE	Mitotic Prophase	128	0.4314	1.688	0	0.017349	0.95	3563	tags=43%, list=24%, signal=56%
WikiPathways	WP_PHOTODYNAMIC_THERAPYINDUCED_HIF1_SURVIVAL_SIGNALING	Photodynamic Therapyinduced Hif1 Survival Signaling	33	0.527	1.6826	0.00641026	0.0395072	0.877	2420	tags=33%, list=16%, signal=40%
Reactome	REACTOME_APC_C_CDH1_MEDIATED_DEGRADATION_OF_CDC20_AND_OTHER_APC_C_CDH1_TARGETED_PROTEINS_IN_LATE_MITOSIS_EARLY_G1	Apc C Cdh1 Mediated Degradation Of Cdc20 And Other Apc C Cdh1 Targeted Proteins In Late Mitosis Early G1	60	0.471	1.6807	0.00347222	0.0187813	0.962	4890	tags=65%, list=33%, signal=97%
Hallmarks	HALLMARK_COMPLEMENT	Complement	134	0.4282	1.6803	0	0.00428025	0.041	2913	tags=34%, list=20%, signal=42%
Reactome	REACTOME_BIOLOGICAL_OXIDATIONS	Biological Oxidations	99	0.4433	1.6797	0	0.0188326	0.962	3897	tags=41%, list=26%, signal=56%
Reactome	REACTOME_TCF_DEPENDENT_SIGNALING_IN_RESPONSE_TO_WNT	Tcf Dependent Signaling In Response To Wnt	176	0.4185	1.6771	0	0.0193081	0.964	4302	tags=51%, list=29%, signal=71%
WikiPathways	WP_PARKINUBIQUITIN_PROTEASOMAL_SYSTEM_PATHWAY	Parkinubiquitin Proteasomal System Pathway	57	0.4741	1.6764	0.00116144	0.041385	0.895	3834	tags=46%, list=26%, signal=61%
Hallmarks	HALLMARK_GLYCOLYSIS	Glycolysis	168	0.4141	1.6736	0	0.00439197	0.047	3638	tags=39%, list=25%, signal=52%
Reactome	REACTOME_RESPONSE_TO_ELEVATED_PLATELET_CYTOSOLIC_CA2	Response To Elevated Platelet Cytosolic Ca2	88	0.4446	1.6733	0	0.0199877	0.971	2883	tags=35%, list=20%, signal=44%
Reactome	REACTOME_COOPERATION_OF_PREFOLDIN_AND_TRIC_CCT_IN_ACTIN_AND_TUBULIN_FOLDING	Cooperation Of Prefoldin And Tric Cct In Actin And Tubulin Folding	25	0.5431	1.672	0.00929615	0.0201119	0.971	3838	tags=44%, list=26%, signal=59%
Hallmarks	HALLMARK_DNA_REPAIR	Dna Repair	139	0.4277	1.6707	0	0.00415799	0.049	3706	tags=37%, list=25%, signal=49%
Reactome	REACTOME_SYNTHESIS_OF_DNA	Synthesis Of Dna	106	0.4447	1.67	0.00109051	0.0205089	0.974	4970	tags=55%, list=34%, signal=82%
Reactome	REACTOME_SRP_DEPENDENT_COTRANSLATIONAL_PROTEIN_TARGETING_TO_MEMBRANE	Srp Dependent Cotranslational Protein Targeting To Membrane	104	0.4394	1.6694	0.0010929	0.0205323	0.974	5370	tags=56%, list=36%, signal=87%
Reactome	REACTOME_SIGNALING_BY_INTERLEUKINS	Signaling By Interleukins	312	0.4027	1.6678	0	0.0208768	0.977	3757	tags=41%, list=25%, signal=54%
WikiPathways	WP_PHOTODYNAMIC_THERAPYINDUCED_NFKB_SURVIVAL_SIGNALING	Photodynamic Therapyinduced Nfkb Survival Signaling	27	0.5423	1.6676	0.00512164	0.0445703	0.919	2022	tags=37%, list=14%, signal=43%
Reactome	REACTOME_ASSEMBLY_AND_CELL_SURFACE_PRESENTATION_OF_NMDA_RECEPTORS	Assembly And Cell Surface Presentation Of Nmda Receptors	24	0.5539	1.664	0.00670241	0.0215063	0.98	2833	tags=50%, list=19%, signal=62%
Reactome	REACTOME_ABC_FAMILY_PROTEINS_MEDIATED_TRANSPORT	Abc Family Proteins Mediated Transport	73	0.462	1.6638	0.00230415	0.0214394	0.98	4050	tags=51%, list=27%, signal=70%
Reactome	REACTOME_SIGNALING_BY_NOTCH4	Signaling By Notch4	67	0.467	1.6633	0	0.0214291	0.981	4050	tags=52%, list=27%, signal=72%
WikiPathways	WP_MITOCHONDRIAL_IMMUNE_RESPONSE_TO_SARSCOV2	Mitochondrial Immune Response To Sarscov2	22	0.564	1.6628	0.00949797	0.0463895	0.928	4613	tags=59%, list=31%, signal=86%
Reactome	REACTOME_LATE_ENDOSOMAL_MICROAUTOPHAGY	Late Endosomal Microautophagy	28	0.5377	1.6609	0.00929615	0.0218955	0.982	3775	tags=46%, list=26%, signal=62%
WikiPathways	WP_NRF2ARE_REGULATION	Nrf2Are Regulation	21	0.5805	1.6561	0.00810811	0.0494997	0.943	1825	tags=38%, list=12%, signal=43%
Reactome	REACTOME_GAMMA_CARBOXYLATION_HYPUSINYLATION_HYDROXYLATION_AND_ARYLSULFATASE_ACTIVATION	Gamma Carboxylation Hypusinylation Hydroxylation And Arylsulfatase Activation	50	0.4825	1.656	0.00242718	0.0230754	0.983	4324	tags=48%, list=29%, signal=68%
Reactome	REACTOME_AUTOPHAGY	Autophagy	138	0.4205	1.6527	0	0.0237458	0.983	3935	tags=36%, list=27%, signal=48%
WikiPathways	WP_NUCLEOSOME_REMODELING_COMPLEX	Nucleosome Remodeling Complex	28	0.5326	1.6522	0.00643501	0.0508293	0.949	3432	tags=54%, list=23%, signal=70%
WikiPathways	WP_OXIDATIVE_STRESS_RESPONSE	Oxidative Stress Response	23	0.5482	1.6517	0.0133511	0.0501879	0.949	2174	tags=39%, list=15%, signal=46%
Reactome	REACTOME_METALLOPROTEASE_DUBS	Metalloprotease Dubs	32	0.5176	1.6514	0.0065445	0.0238551	0.984	3639	tags=56%, list=25%, signal=75%
WikiPathways	WP_OVERVIEW_OF_PROINFLAMMATORY_AND_PROFIBROTIC_MEDIATORS	Overview Of Proinflammatory And Profibrotic Mediators	27	0.5361	1.6498	0.00905563	0.0502498	0.949	2022	tags=44%, list=14%, signal=51%
Reactome	REACTOME_SIGNALING_BY_HEDGEHOG	Signaling By Hedgehog	116	0.4249	1.6493	0	0.0242975	0.988	3937	tags=45%, list=27%, signal=61%
Reactome	REACTOME_REGULATION_OF_CDH1_GENE_TRANSCRIPTION	Regulation Of Cdh1 Gene Transcription	87	0.4426	1.647	0.00111235	0.0247815	0.989	3899	tags=57%, list=26%, signal=78%
Reactome	REACTOME_FORMATION_OF_THE_EARLY_ELONGATION_COMPLEX	Formation Of The Early Elongation Complex	30	0.5281	1.6465	0.00514139	0.0248512	0.989	3003	tags=43%, list=20%, signal=54%
Reactome	REACTOME_INFLAMMASOMES	Inflammasomes	16	0.6004	1.6436	0.0069541	0.0254994	0.99	419	tags=31%, list=3%, signal=32%
WikiPathways	WP_OSTEOARTHRITIC_CHONDROCYTE_HYPERTROPHY	Osteoarthritic Chondrocyte Hypertrophy	38	0.5004	1.6434	0.0075662	0.0529341	0.956	1750	tags=37%, list=12%, signal=42%
Reactome	REACTOME_ZBP1_DAI_MEDIATED_INDUCTION_OF_TYPE_I_IFNS	Zbp1 Dai Mediated Induction Of Type I Ifns	18	0.5788	1.643	0.0137552	0.0255592	0.99	2524	tags=39%, list=17%, signal=47%
Reactome	REACTOME_PROCESSING_OF_DNA_DOUBLE_STRAND_BREAK_ENDS	Processing Of Dna Double Strand Break Ends	84	0.441	1.6429	0.00225734	0.0254706	0.99	4167	tags=44%, list=28%, signal=61%
WikiPathways	WP_MIRTARGETED_GENES_IN_LEUKOCYTES	Mirtargeted Genes In Leukocytes	120	0.4246	1.6421	0.00105597	0.0527499	0.956	3055	tags=33%, list=21%, signal=41%
Reactome	REACTOME_ASSEMBLY_OF_COLLAGEN_FIBRILS_AND_OTHER_MULTIMERIC_STRUCTURES	Assembly Of Collagen Fibrils And Other Multimeric Structures	39	0.4954	1.6397	0.00742574	0.0262094	0.991	3050	tags=54%, list=21%, signal=68%
Reactome	REACTOME_SYNTHESIS_OF_BILE_ACIDS_AND_BILE_SALTS	Synthesis Of Bile Acids And Bile Salts	19	0.5717	1.6376	0.0136426	0.0267246	0.991	431	tags=26%, list=3%, signal=27%
Hallmarks	HALLMARK_OXIDATIVE_PHOSPHORYLATION	Oxidative Phosphorylation	196	0.4025	1.6357	0	0.00673623	0.087	4936	tags=45%, list=33%, signal=67%
WikiPathways	WP_NONGENOMIC_ACTIONS_OF_125DIHYDROXYVITAMIN_D3	Nongenomic Actions Of 125Dihydroxyvitamin D3	50	0.4778	1.6324	0.00726392	0.0573798	0.97	3005	tags=38%, list=20%, signal=48%
WikiPathways	WP_CYTOSOLIC_DNASENSING_PATHWAY	Cytosolic Dnasensing Pathway	46	0.4857	1.6319	0.00881612	0.0567651	0.971	2542	tags=33%, list=17%, signal=39%
Reactome	REACTOME_EUKARYOTIC_TRANSLATION_INITIATION	Eukaryotic Translation Initiation	110	0.4246	1.6316	0.00109409	0.0281551	0.992	5370	tags=56%, list=36%, signal=88%
Reactome	REACTOME_AMINO_ACIDS_REGULATE_MTORC1	Amino Acids Regulate Mtorc1	48	0.4761	1.6313	0.00724638	0.0281171	0.992	3786	tags=48%, list=26%, signal=64%
Reactome	REACTOME_REGULATION_OF_RUNX2_EXPRESSION_AND_ACTIVITY	Regulation Of Runx2 Expression And Activity	55	0.4643	1.6308	0.00475059	0.0281156	0.992	4050	tags=53%, list=27%, signal=72%
Reactome	REACTOME_CARBOXYTERMINAL_POST_TRANSLATIONAL_MODIFICATIONS_OF_TUBULIN	Carboxyterminal Post Translational Modifications Of Tubulin	27	0.527	1.6303	0.0078637	0.0281042	0.992	3865	tags=48%, list=26%, signal=65%
Reactome	REACTOME_SARS_COV_1_MODULATES_HOST_TRANSLATION_MACHINERY	Sars Cov 1 Modulates Host Translation Machinery	32	0.5185	1.6296	0.00881612	0.0282257	0.992	4903	tags=66%, list=33%, signal=98%
Reactome	REACTOME_CONSTITUTIVE_SIGNALING_BY_AKT1_E17K_IN_CANCER	Constitutive Signaling By Akt1 E17K In Cancer	24	0.5522	1.6294	0.0101523	0.0281428	0.992	1771	tags=42%, list=12%, signal=47%
Reactome	REACTOME_RRNA_PROCESSING	Rrna Processing	196	0.4017	1.6283	0	0.0282881	0.993	5593	tags=52%, list=38%, signal=82%
Reactome	REACTOME_AEROBIC_RESPIRATION_AND_RESPIRATORY_ELECTRON_TRANSPORT	Aerobic Respiration And Respiratory Electron Transport	223	0.4004	1.6262	0	0.0288584	0.995	5240	tags=48%, list=36%, signal=74%
Reactome	REACTOME_METABOLIC_DISORDERS_OF_BIOLOGICAL_OXIDATION_ENZYMES	Metabolic Disorders Of Biological Oxidation Enzymes	19	0.5744	1.626	0.0187166	0.028793	0.995	2109	tags=47%, list=14%, signal=55%
WikiPathways	WP_16P122_COPY_NUMBER_VARIATION_SYNDROME_520KB	16P122 Copy Number Variation Syndrome 520Kb	47	0.479	1.6217	0.00713436	0.0619209	0.983	4422	tags=49%, list=30%, signal=70%
Reactome	REACTOME_TAK1_DEPENDENT_IKK_AND_NF_KAPPA_B_ACTIVATION	Tak1 Dependent Ikk And Nf Kappa B Activation	38	0.4954	1.62	0.00122699	0.0306379	0.998	3127	tags=37%, list=21%, signal=47%
WikiPathways	WP_NUCLEOTIDEBINDING_OLIGOMERIZATION_DOMAIN_NOD_PATHWAY	Nucleotidebinding Oligomerization Domain Nod Pathway	26	0.5333	1.619	0.00643501	0.0626237	0.985	864	tags=27%, list=6%, signal=29%
WikiPathways	WP_EBOLA_VIRUS_INFECTION_IN_HOST	Ebola Virus Infection In Host	92	0.4336	1.6148	0.00110619	0.0642318	0.986	2928	tags=37%, list=20%, signal=46%
WikiPathways	WP_TESSADORIBICKNELLVAN_HAAFTEN_SYNDROME_VARIANTS_NUCLEOSOME_ASSEMBLY	Tessadoribicknellvan Haaften Syndrome Variants Nucleosome Assembly	17	0.5786	1.6135	0.0140647	0.0642614	0.987	3432	tags=71%, list=23%, signal=92%
WikiPathways	WP_NAD_METABOLISM_IN_ONCOGENEINDUCED_SENESCENCE_AND_MITOCHONDRIAL_DYSFUNCTIONASSOCIATED_SENESCENCE	Nad Metabolism In Oncogeneinduced Senescence And Mitochondrial Dysfunctionassociated Senescence	19	0.5683	1.6134	0.0111576	0.0633928	0.988	1110	tags=26%, list=8%, signal=28%
Reactome	REACTOME_COLLAGEN_FORMATION	Collagen Formation	57	0.4654	1.6125	0.00477897	0.0328785	0.999	3050	tags=49%, list=21%, signal=62%
Reactome	REACTOME_INFECTION_WITH_ENTEROBACTERIA	Infection With Enterobacteria	28	0.5214	1.6122	0.00902062	0.032805	0.999	3127	tags=43%, list=21%, signal=54%
Reactome	REACTOME_COPI_INDEPENDENT_GOLGI_TO_ER_RETROGRADE_TRAFFIC	Copi Independent Golgi To Er Retrograde Traffic	43	0.4846	1.6092	0.0121655	0.0336451	0.999	4035	tags=42%, list=27%, signal=57%
Reactome	REACTOME_ESTROGEN_DEPENDENT_GENE_EXPRESSION	Estrogen Dependent Gene Expression	129	0.4122	1.6054	0.00215285	0.0346534	0.999	3589	tags=48%, list=24%, signal=63%
Reactome	REACTOME_BINDING_AND_UPTAKE_OF_LIGANDS_BY_SCAVENGER_RECEPTORS	Binding And Uptake Of Ligands By Scavenger Receptors	20	0.5522	1.6027	0.0162602	0.0353996	0.999	3134	tags=40%, list=21%, signal=51%
Reactome	REACTOME_TRANSCRIPTIONAL_REGULATION_BY_RUNX1	Transcriptional Regulation By Runx1	175	0.4001	1.6024	0.0010395	0.0353732	0.999	4340	tags=53%, list=29%, signal=74%
Reactome	REACTOME_EPIGENETIC_REGULATION_OF_GENE_EXPRESSION_BY_MLL3_AND_MLL4_COMPLEXES	Epigenetic Regulation Of Gene Expression By Mll3 And Mll4 Complexes	109	0.4159	1.6017	0.00438597	0.0354437	0.999	4248	tags=54%, list=29%, signal=75%
Reactome	REACTOME_HIV_INFECTION	Hiv Infection	199	0.3963	1.6012	0	0.0354804	0.999	3775	tags=37%, list=26%, signal=49%
WikiPathways	WP_1P36_COPY_NUMBER_VARIATION_SYNDROME	1P36 Copy Number Variation Syndrome	68	0.4366	1.6008	0.00112108	0.0707625	0.994	3980	tags=44%, list=27%, signal=60%
Reactome	REACTOME_NRIF_SIGNALS_CELL_DEATH_FROM_THE_NUCLEUS	Nrif Signals Cell Death From The Nucleus	15	0.5986	1.6008	0.0169492	0.035479	0.999	3419	tags=53%, list=23%, signal=69%
WikiPathways	WP_NUCLEAR_RECEPTORS_IN_LIPID_METABOLISM_AND_TOXICITY	Nuclear Receptors In Lipid Metabolism And Toxicity	16	0.5831	1.6006	0.0204978	0.0699889	0.994	3421	tags=63%, list=23%, signal=81%
Reactome	REACTOME_HIV_TRANSCRIPTION_ELONGATION	Hiv Transcription Elongation	39	0.4931	1.6002	0.0125313	0.0355526	0.999	3003	tags=38%, list=20%, signal=48%
Reactome	REACTOME_DEUBIQUITINATION	Deubiquitination	233	0.3919	1.5994	0	0.0357014	0.999	3972	tags=41%, list=27%, signal=55%
WikiPathways	WP_CLEAR_CELL_RENAL_CELL_CARCINOMA_PATHWAYS	Clear Cell Renal Cell Carcinoma Pathways	73	0.4409	1.599	0.00576037	0.0701527	0.994	2123	tags=32%, list=14%, signal=37%
WikiPathways	WP_IL1_AND_MEGAKARYOCYTES_IN_OBESITY	Il1 And Megakaryocytes In Obesity	18	0.5804	1.5984	0.0152144	0.0694777	0.994	3909	tags=56%, list=26%, signal=75%
Reactome	REACTOME_REGULATION_OF_NF_KAPPA_B_SIGNALING	Regulation Of Nf Kappa B Signaling	17	0.5902	1.5981	0.0208914	0.0359807	0.999	3127	tags=47%, list=21%, signal=60%
Hallmarks	HALLMARK_IL6_JAK_STAT3_SIGNALING	Il6 Jak Stat3 Signaling	51	0.4611	1.5969	0.0119904	0.0103707	0.139	1167	tags=24%, list=8%, signal=25%
WikiPathways	WP_SIGNAL_TRANSDUCTION_THROUGH_IL1R	Signal Transduction Through Il1R	26	0.5206	1.5959	0.024032	0.0704474	0.994	2235	tags=42%, list=15%, signal=50%
Reactome	REACTOME_ASSEMBLY_OF_THE_HIV_VIRION	Assembly Of The Hiv Virion	15	0.5972	1.5955	0.0210084	0.0366513	0.999	3656	tags=53%, list=25%, signal=71%
Reactome	REACTOME_CELL_CELL_COMMUNICATION	Cell Cell Communication	257	0.3898	1.5906	0	0.0383445	0.999	3799	tags=45%, list=26%, signal=59%
Reactome	REACTOME_GAP_JUNCTION_TRAFFICKING_AND_REGULATION	Gap Junction Trafficking And Regulation	29	0.5182	1.5885	0.018543	0.0389936	0.999	3024	tags=55%, list=20%, signal=69%
Reactome	REACTOME_INTERLEUKIN_4_AND_INTERLEUKIN_13_SIGNALING	Interleukin 4 And Interleukin 13 Signaling	68	0.4398	1.5874	0.00577367	0.0393088	1	2105	tags=29%, list=14%, signal=34%
WikiPathways	WP_FOLATE_METABOLISM	Folate Metabolism	36	0.4895	1.5866	0.00880503	0.0760873	0.997	4795	tags=53%, list=32%, signal=78%
WikiPathways	WP_GLYCOSYLATION_AND_RELATED_CONGENITAL_DEFECTS	Glycosylation And Related Congenital Defects	25	0.5118	1.5862	0.0173797	0.0754035	0.997	3758	tags=44%, list=25%, signal=59%
Reactome	REACTOME_SEMA4D_IN_SEMAPHORIN_SIGNALING	Sema4D In Semaphorin Signaling	21	0.5389	1.5861	0.0230769	0.03965	1	2184	tags=43%, list=15%, signal=50%
WikiPathways	WP_EICOSANOID_METABOLISM_VIA_CYCLOOXYGENASES_COX	Eicosanoid Metabolism Via Cyclooxygenases Cox	15	0.5921	1.5859	0.022567	0.074694	0.997	1810	tags=47%, list=12%, signal=53%
WikiPathways	WP_NONALCOHOLIC_FATTY_LIVER_DISEASE	Nonalcoholic Fatty Liver Disease	125	0.4109	1.585	0.00107643	0.0742166	0.997	5768	tags=65%, list=39%, signal=105%
Reactome	REACTOME_MAPK6_MAPK4_SIGNALING	Mapk6 Mapk4 Signaling	73	0.4331	1.5831	0.00342466	0.0405992	1	4050	tags=49%, list=27%, signal=68%
WikiPathways	WP_IL1_SIGNALING	Il1 Signaling	52	0.457	1.5819	0.0117371	0.0755754	0.997	3120	tags=42%, list=21%, signal=53%
Reactome	REACTOME_SIGNALING_BY_ROBO_RECEPTORS	Signaling By Robo Receptors	182	0.3909	1.5815	0.00205973	0.041008	1	5126	tags=54%, list=35%, signal=81%
Reactome	REACTOME_SELECTIVE_AUTOPHAGY	Selective Autophagy	75	0.4333	1.5815	0.00677201	0.0408273	1	3148	tags=31%, list=21%, signal=39%
Reactome	REACTOME_MHC_CLASS_II_ANTIGEN_PRESENTATION	Mhc Class Ii Antigen Presentation	92	0.4193	1.58	0.00437637	0.0412494	1	3262	tags=39%, list=22%, signal=50%
Reactome	REACTOME_PROTEIN_HYDROXYLATION	Protein Hydroxylation	19	0.5476	1.5798	0.0261348	0.0411411	1	4324	tags=47%, list=29%, signal=67%
Reactome	REACTOME_CHROMOSOME_MAINTENANCE	Chromosome Maintenance	122	0.4082	1.5797	0.00214362	0.0410429	1	3563	tags=43%, list=24%, signal=56%
Reactome	REACTOME_GAP_JUNCTION_ASSEMBLY	Gap Junction Assembly	16	0.578	1.5796	0.0163043	0.0409141	1	3024	tags=63%, list=20%, signal=79%
Hallmarks	HALLMARK_HEME_METABOLISM	Heme Metabolism	155	0.394	1.5788	0.00208768	0.0116943	0.169	3730	tags=35%, list=25%, signal=47%
Reactome	REACTOME_HOMOLOGY_DIRECTED_REPAIR	Homology Directed Repair	123	0.408	1.5785	0	0.0411601	1	4302	tags=41%, list=29%, signal=58%
Reactome	REACTOME_NEUTROPHIL_DEGRANULATION	Neutrophil Degranulation	325	0.3815	1.5784	0	0.0409878	1	3646	tags=36%, list=25%, signal=46%
WikiPathways	WP_CORTICOTROPINRELEASING_HORMONE_SIGNALING	Corticotropinreleasing Hormone Signaling	67	0.4324	1.5774	0.00688073	0.0779501	0.998	2182	tags=28%, list=15%, signal=33%
Reactome	REACTOME_ACTIVATION_OF_AMPK_DOWNSTREAM_OF_NMDARS	Activation Of Ampk Downstream Of Nmdars	18	0.5695	1.5727	0.0182584	0.0431958	1	2833	tags=44%, list=19%, signal=55%
Hallmarks	HALLMARK_EPITHELIAL_MESENCHYMAL_TRANSITION	Epithelial Mesenchymal Transition	158	0.3949	1.572	0.00208768	0.0114019	0.175	3050	tags=36%, list=21%, signal=45%
Reactome	REACTOME_NONSENSE_MEDIATED_DECAY_NMD	Nonsense Mediated Decay Nmd	107	0.4075	1.5718	0.00108932	0.0434809	1	4932	tags=51%, list=33%, signal=77%
Reactome	REACTOME_CELL_EXTRACELLULAR_MATRIX_INTERACTIONS	Cell Extracellular Matrix Interactions	17	0.5767	1.5717	0.0185185	0.0433538	1	2453	tags=47%, list=17%, signal=56%
Reactome	REACTOME_COPI_MEDIATED_ANTEROGRADE_TRANSPORT	Copi Mediated Anterograde Transport	85	0.4218	1.5688	0.00335196	0.0444112	1	4829	tags=47%, list=33%, signal=70%
WikiPathways	WP_BLADDER_CANCER	Bladder Cancer	37	0.4767	1.5673	0.0187735	0.0847822	0.998	2650	tags=46%, list=18%, signal=56%
Reactome	REACTOME_COLLAGEN_DEGRADATION	Collagen Degradation	38	0.4786	1.5641	0.0114943	0.0462274	1	2913	tags=47%, list=20%, signal=59%
Hallmarks	HALLMARK_COAGULATION	Coagulation	79	0.421	1.5597	0.0102389	0.0124445	0.203	3228	tags=39%, list=22%, signal=50%
Reactome	REACTOME_MATERNAL_TO_ZYGOTIC_TRANSITION_MZT	Maternal To Zygotic Transition Mzt	91	0.4168	1.5575	0.00220264	0.0488567	1	3563	tags=45%, list=24%, signal=59%
Reactome	REACTOME_DNA_REPAIR	Dna Repair	303	0.376	1.5549	0	0.0498444	1	3563	tags=33%, list=24%, signal=43%
Reactome	REACTOME_ACTIVATION_OF_APC_C_AND_APC_C_CDC20_MEDIATED_DEGRADATION_OF_MITOTIC_PROTEINS	Activation Of Apc C And Apc C Cdc20 Mediated Degradation Of Mitotic Proteins	62	0.4363	1.5542	0.0104895	0.0499796	1	4890	tags=63%, list=33%, signal=94%
Reactome	REACTOME_INFLUENZA_VIRAL_RNA_TRANSCRIPTION_AND_REPLICATION	Influenza Viral Rna Transcription And Replication	128	0.4044	1.5509	0.00214823	0.0512976	1	5370	tags=52%, list=36%, signal=82%
Reactome	REACTOME_ROS_AND_RNS_PRODUCTION_IN_PHAGOCYTES	Ros And Rns Production In Phagocytes	22	0.5224	1.55	0.0197368	0.051583	1	4057	tags=55%, list=27%, signal=75%
Reactome	REACTOME_REGULATION_OF_T_CELL_ACTIVATION_BY_CD28_FAMILY	Regulation Of T Cell Activation By Cd28 Family	213	0.3812	1.5479	0.00103734	0.0522515	1	3937	tags=44%, list=27%, signal=59%
Reactome	REACTOME_DENGUE_VIRUS_INFECTION	Dengue Virus Infection	353	0.3722	1.5473	0	0.0523078	1	3721	tags=37%, list=25%, signal=49%
Reactome	REACTOME_ACTIVATION_OF_MATRIX_METALLOPROTEINASES	Activation Of Matrix Metalloproteinases	18	0.5656	1.5468	0.0245902	0.0523126	1	2985	tags=56%, list=20%, signal=70%
Reactome	REACTOME_PLASMA_LIPOPROTEIN_ASSEMBLY_REMODELING_AND_CLEARANCE	Plasma Lipoprotein Assembly Remodeling And Clearance	45	0.4457	1.5465	0.0194175	0.0522467	1	3633	tags=49%, list=25%, signal=65%
Reactome	REACTOME_FANCONI_ANEMIA_PATHWAY	Fanconi Anemia Pathway	36	0.4747	1.5455	0.0250941	0.0525305	1	4539	tags=50%, list=31%, signal=72%
Reactome	REACTOME_GLUCOSE_METABOLISM	Glucose Metabolism	69	0.4231	1.5453	0.0103926	0.0524189	1	4260	tags=42%, list=29%, signal=59%
WikiPathways	WP_PROSTAGLANDIN_SYNTHESIS_AND_REGULATION	Prostaglandin Synthesis And Regulation	23	0.5164	1.5446	0.0217687	0.104343	1	2105	tags=39%, list=14%, signal=46%
Reactome	REACTOME_DEGRADATION_OF_BETA_CATENIN_BY_THE_DESTRUCTION_COMPLEX	Degradation Of Beta Catenin By The Destruction Complex	69	0.4302	1.5418	0.008	0.0541243	1	4050	tags=48%, list=27%, signal=66%
Reactome	REACTOME_TP53_REGULATES_METABOLIC_GENES	Tp53 Regulates Metabolic Genes	66	0.4262	1.5412	0.00576701	0.0542294	1	2625	tags=33%, list=18%, signal=40%
WikiPathways	WP_P53_TRANSCRIPTIONAL_GENE_NETWORK	P53 Transcriptional Gene Network	71	0.428	1.5411	0.00557414	0.106305	1	3225	tags=39%, list=22%, signal=50%
Reactome	REACTOME_PROCESSIVE_SYNTHESIS_ON_THE_C_STRAND_OF_THE_TELOMERE	Processive Synthesis On The C Strand Of The Telomere	19	0.5439	1.5396	0.0337838	0.0548099	1	3706	tags=42%, list=25%, signal=56%
Reactome	REACTOME_SLC_MEDIATED_TRANSPORT_OF_ORGANIC_ANIONS	Slc Mediated Transport Of Organic Anions	16	0.5756	1.5386	0.0365682	0.0550453	1	1606	tags=38%, list=11%, signal=42%
Reactome	REACTOME_TRANSCRIPTION_COUPLED_NUCLEOTIDE_EXCISION_REPAIR_TC_NER	Transcription Coupled Nucleotide Excision Repair Tc Ner	74	0.4209	1.5383	0.0101237	0.0549949	1	5908	tags=61%, list=40%, signal=101%
Reactome	REACTOME_PTEN_REGULATION	Pten Regulation	115	0.401	1.5382	0.00551268	0.0548113	1	4050	tags=43%, list=27%, signal=59%
WikiPathways	WP_FLUOROPYRIMIDINE_ACTIVITY	Fluoropyrimidine Activity	26	0.5006	1.5377	0.0369898	0.108413	1	3347	tags=42%, list=23%, signal=55%
WikiPathways	WP_MATRIX_METALLOPROTEINASES	Matrix Metalloproteinases	16	0.5634	1.5376	0.0347705	0.107216	1	2985	tags=56%, list=20%, signal=70%
WikiPathways	WP_TOLLLIKE_RECEPTOR_SIGNALING_RELATED_TO_MYD88	Tolllike Receptor Signaling Related To Myd88	24	0.518	1.5372	0.022942	0.106426	1	1146	tags=25%, list=8%, signal=27%
Reactome	REACTOME_NUCLEOTIDE_BINDING_DOMAIN_LEUCINE_RICH_REPEAT_CONTAINING_RECEPTOR_NLR_SIGNALING_PATHWAYS	Nucleotide Binding Domain Leucine Rich Repeat Containing Receptor Nlr Signaling Pathways	47	0.4557	1.5346	0.0110701	0.0565299	1	930	tags=23%, list=6%, signal=25%
Reactome	REACTOME_DISEASES_OF_METABOLISM	Diseases Of Metabolism	180	0.3808	1.5333	0	0.056975	1	3515	tags=38%, list=24%, signal=49%
Reactome	REACTOME_RESOLUTION_OF_ABASIC_SITES_AP_SITES	Resolution Of Abasic Sites Ap Sites	38	0.4627	1.5314	0.0176768	0.057846	1	3955	tags=39%, list=27%, signal=54%
Reactome	REACTOME_DOWNSTREAM_SIGNALING_EVENTS_OF_B_CELL_RECEPTOR_BCR	Downstream Signaling Events Of B Cell Receptor Bcr	65	0.4213	1.5299	0.00922722	0.0584308	1	4302	tags=52%, list=29%, signal=74%
Reactome	REACTOME_METABOLISM_OF_CARBOHYDRATES_AND_CARBOHYDRATE_DERIVATIVES	Metabolism Of Carbohydrates And Carbohydrate Derivatives	229	0.3749	1.5289	0	0.0588257	1	3515	tags=36%, list=24%, signal=47%
Reactome	REACTOME_IRE1ALPHA_ACTIVATES_CHAPERONES	Ire1Alpha Activates Chaperones	48	0.4478	1.5283	0.0106132	0.0590234	1	2907	tags=35%, list=20%, signal=44%
WikiPathways	WP_2Q112_COPY_NUMBER_VARIATION_SYNDROME	2Q112 Copy Number Variation Syndrome	26	0.5087	1.5277	0.036	0.11444	1	4056	tags=42%, list=27%, signal=58%
Reactome	REACTOME_ACTIVATION_OF_NMDA_RECEPTORS_AND_POSTSYNAPTIC_EVENTS	Activation Of Nmda Receptors And Postsynaptic Events	62	0.4247	1.5273	0.0199063	0.0593719	1	1783	tags=29%, list=12%, signal=33%
Reactome	REACTOME_ATTACHMENT_AND_ENTRY	Attachment And Entry	15	0.5677	1.527	0.0372493	0.0592645	1	3515	tags=53%, list=24%, signal=70%
WikiPathways	WP_5Q35_COPY_NUMBER_VARIATION	5Q35 Copy Number Variation	85	0.4156	1.5264	0.00896861	0.114301	1	2950	tags=35%, list=20%, signal=44%
Reactome	REACTOME_RIPK1_MEDIATED_REGULATED_NECROSIS	Ripk1 Mediated Regulated Necrosis	27	0.4952	1.5258	0.0325097	0.0596437	1	3127	tags=41%, list=21%, signal=52%
Hallmarks	HALLMARK_ADIPOGENESIS	Adipogenesis	173	0.3801	1.525	0.00209644	0.0167657	0.274	3753	tags=36%, list=25%, signal=48%
WikiPathways	WP_TAR_SYNDROME	Tar Syndrome	39	0.4652	1.5239	0.0195838	0.115775	1	2880	tags=31%, list=20%, signal=38%
WikiPathways	WP_CONGENITAL_GENERALIZED_LIPODYSTROPHY	Congenital Generalized Lipodystrophy	16	0.5581	1.5231	0.0366197	0.115293	1	4448	tags=63%, list=30%, signal=89%
Reactome	REACTOME_METABOLISM_OF_NUCLEOTIDES	Metabolism Of Nucleotides	79	0.4108	1.5224	0.0124153	0.0612909	1	2371	tags=28%, list=16%, signal=33%
WikiPathways	WP_DENGUE2_INTERACTIONS_WITH_COMPLEMENT_AND_COAGULATION_CASCADES	Dengue2 Interactions With Complement And Coagulation Cascades	24	0.5098	1.5222	0.0383091	0.114901	1	1757	tags=33%, list=12%, signal=38%
Reactome	REACTOME_INTRAFLAGELLAR_TRANSPORT	Intraflagellar Transport	43	0.45	1.5203	0.0155131	0.0622693	1	2833	tags=37%, list=19%, signal=46%
Reactome	REACTOME_PROGRAMMED_CELL_DEATH	Programmed Cell Death	168	0.3816	1.5203	0	0.0620438	1	3644	tags=38%, list=25%, signal=49%
Reactome	REACTOME_SIGNALING_BY_NUCLEAR_RECEPTORS	Signaling By Nuclear Receptors	231	0.3764	1.5201	0.00102354	0.0619622	1	3432	tags=40%, list=23%, signal=51%
WikiPathways	WP_PREGNANE_X_RECEPTOR_PATHWAY	Pregnane X Receptor Pathway	16	0.5566	1.5196	0.051676	0.116217	1	1525	tags=31%, list=10%, signal=35%
Reactome	REACTOME_DOWNREGULATION_OF_ERBB2_SIGNALING	Downregulation Of Erbb2 Signaling	23	0.5101	1.5192	0.0271003	0.0622716	1	3127	tags=48%, list=21%, signal=61%
WikiPathways	WP_RESISTIN_AS_A_REGULATOR_OF_INFLAMMATION	Resistin As A Regulator Of Inflammation	27	0.493	1.5178	0.0337382	0.11701	1	2498	tags=37%, list=17%, signal=45%
Reactome	REACTOME_MYD88_INDEPENDENT_TLR4_CASCADE	Myd88 Independent Tlr4 Cascade	97	0.3981	1.5177	0.00542888	0.0628373	1	3127	tags=31%, list=21%, signal=39%
Reactome	REACTOME_MITOCHONDRIAL_PROTEIN_IMPORT	Mitochondrial Protein Import	58	0.4331	1.5172	0.0222743	0.0628911	1	3460	tags=34%, list=23%, signal=45%
Reactome	REACTOME_TRANSCRIPTIONAL_REGULATION_BY_RUNX2	Transcriptional Regulation By Runx2	92	0.4002	1.5157	0.0153173	0.0636174	1	3639	tags=43%, list=25%, signal=57%
Reactome	REACTOME_C_TYPE_LECTIN_RECEPTORS_CLRS	C Type Lectin Receptors Clrs	97	0.3965	1.5138	0.00647249	0.0643953	1	3639	tags=38%, list=25%, signal=50%
Reactome	REACTOME_DISEASES_OF_CARBOHYDRATE_METABOLISM	Diseases Of Carbohydrate Metabolism	27	0.4912	1.5081	0.032	0.0676983	1	3290	tags=44%, list=22%, signal=57%
Reactome	REACTOME_ESR_MEDIATED_SIGNALING	Esr Mediated Signaling	182	0.376	1.5079	0	0.0675646	1	3301	tags=40%, list=22%, signal=51%
Reactome	REACTOME_DNA_DOUBLE_STRAND_BREAK_REPAIR	Dna Double Strand Break Repair	152	0.3751	1.5049	0.00421941	0.0691187	1	3706	tags=35%, list=25%, signal=46%
WikiPathways	WP_DISORDERS_OF_MITOCHONDRIAL_HOMEOSTATIS_DYNAMICS_PROTEIN_IMPORT_AND_QUALITY_CONTROL	Disorders Of Mitochondrial Homeostatis Dynamics Protein Import And Quality Control	56	0.4325	1.5048	0.0177725	0.129657	1	3460	tags=36%, list=23%, signal=46%
WikiPathways	WP_COMPLEMENT_AND_COAGULATION_CASCADES	Complement And Coagulation Cascades	24	0.5098	1.5048	0.0360963	0.128263	1	1757	tags=33%, list=12%, signal=38%
Reactome	REACTOME_SEMA4D_INDUCED_CELL_MIGRATION_AND_GROWTH_CONE_COLLAPSE	Sema4D Induced Cell Migration And Growth Cone Collapse	17	0.5501	1.5023	0.0397805	0.0705594	1	2184	tags=47%, list=15%, signal=55%
WikiPathways	WP_MONOAMINE_TRANSPORT	Monoamine Transport	15	0.566	1.5016	0.035868	0.13045	1	2905	tags=53%, list=20%, signal=66%
WikiPathways	WP_11P112_COPY_NUMBER_VARIATION_SYNDROME	11P112 Copy Number Variation Syndrome	38	0.449	1.501	0.0201765	0.129741	1	1090	tags=24%, list=7%, signal=26%
Reactome	REACTOME_COLLAGEN_BIOSYNTHESIS_AND_MODIFYING_ENZYMES	Collagen Biosynthesis And Modifying Enzymes	39	0.4526	1.5002	0.0255164	0.0716198	1	3641	tags=51%, list=25%, signal=68%
Reactome	REACTOME_EPIGENETIC_REGULATION_BY_WDR5_CONTAINING_HISTONE_MODIFYING_COMPLEXES	Epigenetic Regulation By Wdr5 Containing Histone Modifying Complexes	140	0.38	1.4959	0.0042508	0.0741434	1	3975	tags=46%, list=27%, signal=62%
Reactome	REACTOME_PROTEIN_FOLDING	Protein Folding	74	0.4085	1.4958	0.0125142	0.0739449	1	1746	tags=24%, list=12%, signal=27%
Reactome	REACTOME_TOLL_LIKE_RECEPTOR_CASCADES	Toll Like Receptor Cascades	133	0.382	1.4926	0.00320856	0.0757046	1	3127	tags=31%, list=21%, signal=39%
Reactome	REACTOME_HSF1_DEPENDENT_TRANSACTIVATION	Hsf1 Dependent Transactivation	29	0.4816	1.4924	0.0291878	0.0755969	1	3834	tags=41%, list=26%, signal=56%
Reactome	REACTOME_DEGRADATION_OF_THE_EXTRACELLULAR_MATRIX	Degradation Of The Extracellular Matrix	84	0.4016	1.4919	0.010181	0.0756251	1	2985	tags=40%, list=20%, signal=50%
WikiPathways	WP_NUCLEOTIDE_EXCISION_REPAIR_IN_XERODERMA_PIGMENTOSUM	Nucleotide Excision Repair In Xeroderma Pigmentosum	68	0.4073	1.4901	0.0159091	0.140575	1	5908	tags=59%, list=40%, signal=98%
Reactome	REACTOME_HSF1_ACTIVATION	Hsf1 Activation	23	0.5028	1.4879	0.0401606	0.0779868	1	4374	tags=48%, list=30%, signal=68%
Reactome	REACTOME_MET_ACTIVATES_PTK2_SIGNALING	Met Activates Ptk2 Signaling	22	0.5005	1.4877	0.0384106	0.0778473	1	2132	tags=36%, list=14%, signal=42%
WikiPathways	WP_7OXOC_AND_7BETAHC_PATHWAYS	7Oxoc And 7Betahc Pathways	18	0.5276	1.4871	0.0600801	0.142636	1	5183	tags=67%, list=35%, signal=103%
WikiPathways	WP_PPAR_SIGNALING	Ppar Signaling	30	0.476	1.487	0.0310881	0.141264	1	3692	tags=47%, list=25%, signal=62%
WikiPathways	WP_7Q1123_COPY_NUMBER_VARIATION_SYNDROME	7Q1123 Copy Number Variation Syndrome	89	0.3984	1.486	0.00887902	0.140846	1	4972	tags=49%, list=34%, signal=74%
Reactome	REACTOME_DEATH_RECEPTOR_SIGNALING	Death Receptor Signaling	130	0.3812	1.484	0.00634921	0.0800014	1	3148	tags=32%, list=21%, signal=41%
Reactome	REACTOME_RHO_GTPASES_ACTIVATE_ROCKS	Rho Gtpases Activate Rocks	17	0.5403	1.4835	0.0506329	0.0801029	1	1338	tags=35%, list=9%, signal=39%
WikiPathways	WP_MAPK_SIGNALING	Mapk Signaling	179	0.374	1.483	0.00310881	0.143092	1	2449	tags=28%, list=17%, signal=33%
Reactome	REACTOME_PIWI_INTERACTING_RNA_PIRNA_BIOGENESIS	Piwi Interacting Rna Pirna Biogenesis	17	0.5314	1.4826	0.0454545	0.0804149	1	2799	tags=41%, list=19%, signal=51%
WikiPathways	WP_FOCAL_ADHESION	Focal Adhesion	153	0.3724	1.4823	0.00212089	0.142359	1	2650	tags=32%, list=18%, signal=39%
WikiPathways	WP_HOSTPATHOGEN_INTERACTION_OF_HUMAN_CORONAVIRUSES_APOPTOSIS	Hostpathogen Interaction Of Human Coronaviruses Apoptosis	18	0.5241	1.4823	0.0546218	0.141024	1	1744	tags=39%, list=12%, signal=44%
Reactome	REACTOME_PURINERGIC_SIGNALING_IN_LEISHMANIASIS_INFECTION	Purinergic Signaling In Leishmaniasis Infection	18	0.5351	1.4803	0.0460705	0.0817579	1	864	tags=28%, list=6%, signal=29%
WikiPathways	WP_NETWORK_MAP_OF_SARSCOV2_SIGNALING	Network Map Of Sarscov2 Signaling	158	0.3711	1.4793	0.0042061	0.142946	1	3228	tags=31%, list=22%, signal=39%
Reactome	REACTOME_EPH_EPHRIN_MEDIATED_REPULSION_OF_CELLS	Eph Ephrin Mediated Repulsion Of Cells	43	0.438	1.479	0.0219512	0.0824643	1	3522	tags=51%, list=24%, signal=67%
WikiPathways	WP_FIBRIN_COMPLEMENT_RECEPTOR_3_SIGNALING	Fibrin Complement Receptor 3 Signaling	24	0.4948	1.4765	0.0343461	0.145118	1	4291	tags=50%, list=29%, signal=70%
Reactome	REACTOME_PEPTIDE_LIGAND_BINDING_RECEPTORS	Peptide Ligand Binding Receptors	38	0.4502	1.4752	0.0375758	0.0848207	1	3455	tags=45%, list=23%, signal=58%
Reactome	REACTOME_TOLL_LIKE_RECEPTOR_TLR1_TLR2_CASCADE	Toll Like Receptor Tlr1 Tlr2 Cascade	97	0.387	1.475	0.0163755	0.0846117	1	3127	tags=31%, list=21%, signal=39%
Reactome	REACTOME_FATTY_ACID_METABOLISM	Fatty Acid Metabolism	121	0.3809	1.4741	0.00650759	0.0850796	1	1020	tags=17%, list=7%, signal=18%
Reactome	REACTOME_DISEASES_ASSOCIATED_WITH_GLYCOSYLATION_PRECURSOR_BIOSYNTHESIS	Diseases Associated With Glycosylation Precursor Biosynthesis	15	0.5556	1.4731	0.0438957	0.0854514	1	3758	tags=60%, list=25%, signal=80%
Reactome	REACTOME_P75NTR_SIGNALS_VIA_NF_KB	P75Ntr Signals Via Nf Kb	15	0.5508	1.4703	0.0614286	0.0871375	1	3127	tags=47%, list=21%, signal=59%
Reactome	REACTOME_PKMTS_METHYLATE_HISTONE_LYSINES	Pkmts Methylate Histone Lysines	60	0.4112	1.4674	0.0197674	0.0889576	1	3432	tags=43%, list=23%, signal=56%
WikiPathways	WP_APOPTOSIS_MODULATION_AND_SIGNALING	Apoptosis Modulation And Signaling	72	0.4068	1.4653	0.0227015	0.157751	1	2533	tags=32%, list=17%, signal=38%
WikiPathways	WP_EFFECT_OF_PROGERIN_ON_GENES_INVOLVED_IN_PROGERIA	Effect Of Progerin On Genes Involved In Progeria	35	0.4532	1.4609	0.0385093	0.161729	1	3229	tags=46%, list=22%, signal=58%
Reactome	REACTOME_HS_GAG_DEGRADATION	Hs Gag Degradation	16	0.5412	1.4604	0.0498576	0.0941394	1	3515	tags=50%, list=24%, signal=66%
Reactome	REACTOME_NUCLEAR_ENVELOPE_NE_REASSEMBLY	Nuclear Envelope Ne Reassembly	66	0.4111	1.4595	0.022831	0.0944354	1	3775	tags=39%, list=26%, signal=53%
Reactome	REACTOME_PLATELET_ACTIVATION_SIGNALING_AND_AGGREGATION	Platelet Activation Signaling And Aggregation	174	0.3661	1.4595	0.00839454	0.0941366	1	2437	tags=28%, list=17%, signal=33%
WikiPathways	WP_OMEGA3FATTY_ACIDS_IN_SENESCENCE	Omega3Fatty Acids In Senescence	16	0.531	1.4591	0.0519663	0.162529	1	1810	tags=38%, list=12%, signal=43%
Reactome	REACTOME_NEDDYLATION	Neddylation	206	0.3603	1.4587	0.00204918	0.0945474	1	4054	tags=37%, list=27%, signal=51%
Reactome	REACTOME_INFLUENZA_INFECTION	Influenza Infection	146	0.3717	1.4584	0.00635593	0.0944968	1	5370	tags=50%, list=36%, signal=78%
WikiPathways	WP_T_CELL_MODULATION_AND_DESMOPLASIA_IN_PANCREATIC_CANCER	T Cell Modulation And Desmoplasia In Pancreatic Cancer	28	0.4774	1.4581	0.0436508	0.162259	1	2926	tags=39%, list=20%, signal=49%
WikiPathways	WP_MOLECULAR_PATHWAY_FOR_OXIDATIVE_STRESS	Molecular Pathway For Oxidative Stress	40	0.4419	1.457	0.0486027	0.162047	1	1879	tags=25%, list=13%, signal=29%
WikiPathways	WP_STING_PATHWAY_IN_KAWASAKILIKE_DISEASE_AND_COVID19	Sting Pathway In Kawasakilike Disease And Covid19	18	0.5301	1.4569	0.0552561	0.160777	1	1146	tags=33%, list=8%, signal=36%
Reactome	REACTOME_GAP_FILLING_DNA_REPAIR_SYNTHESIS_AND_LIGATION_IN_GG_NER	Gap Filling Dna Repair Synthesis And Ligation In Gg Ner	25	0.4839	1.4561	0.0526316	0.0959567	1	5908	tags=68%, list=40%, signal=113%
WikiPathways	WP_HOSTPATHOGEN_INTERACTION_OF_HUMAN_CORONAVIRUSES_INTERFERON_INDUCTION	Hostpathogen Interaction Of Human Coronaviruses Interferon Induction	28	0.4676	1.453	0.0503876	0.164486	1	1167	tags=21%, list=8%, signal=23%
Reactome	REACTOME_ACTIVATION_OF_THE_MRNA_UPON_BINDING_OF_THE_CAP_BINDING_COMPLEX_AND_EIFS_AND_SUBSEQUENT_BINDING_TO_43S	Activation Of The Mrna Upon Binding Of The Cap Binding Complex And Eifs And Subsequent Binding To 43S	54	0.4165	1.4529	0.0323353	0.0982595	1	4932	tags=54%, list=33%, signal=80%
Reactome	REACTOME_METABOLISM_OF_AMINO_ACIDS_AND_DERIVATIVES	Metabolism Of Amino Acids And Derivatives	268	0.3512	1.4511	0.00202224	0.0993657	1	4859	tags=48%, list=33%, signal=70%
Reactome	REACTOME_METABOLISM_OF_FAT_SOLUBLE_VITAMINS	Metabolism Of Fat Soluble Vitamins	30	0.469	1.4492	0.0500642	0.100547	1	3134	tags=40%, list=21%, signal=51%
Reactome	REACTOME_MRNA_CAPPING	Mrna Capping	27	0.4728	1.4489	0.0451031	0.100505	1	2799	tags=37%, list=19%, signal=46%
WikiPathways	WP_METABOLIC_EPILEPTIC_DISORDERS	Metabolic Epileptic Disorders	68	0.4044	1.4477	0.0229095	0.169729	1	4155	tags=43%, list=28%, signal=59%
WikiPathways	WP_NF1_COPY_NUMBER_VARIATION_SYNDROME	Nf1 Copy Number Variation Syndrome	87	0.3875	1.4467	0.0268156	0.169713	1	3614	tags=39%, list=24%, signal=51%
WikiPathways	WP_NFKB_SIGNALING_AND_ARTD_FAMILY_MEMBERS	Nfkb Signaling And Artd Family Members	26	0.4723	1.4454	0.0567568	0.170022	1	580	tags=19%, list=4%, signal=20%
Reactome	REACTOME_THE_ROLE_OF_NEF_IN_HIV_1_REPLICATION_AND_DISEASE_PATHOGENESIS	The Role Of Nef In Hiv 1 Replication And Disease Pathogenesis	20	0.5038	1.4454	0.0567568	0.103057	1	2962	tags=45%, list=20%, signal=56%
Reactome	REACTOME_INSULIN_RECEPTOR_RECYCLING	Insulin Receptor Recycling	25	0.4828	1.4453	0.0435374	0.102733	1	4057	tags=48%, list=27%, signal=66%
Hallmarks	HALLMARK_APOPTOSIS	Apoptosis	131	0.3766	1.444	0.0116156	0.0400606	0.548	2227	tags=26%, list=15%, signal=30%
WikiPathways	WP_NEOVASCULARIZATION_PROCESSES	Neovascularization Processes	30	0.4528	1.4422	0.0506971	0.17239	1	1763	tags=30%, list=12%, signal=34%
Reactome	REACTOME_TRANS_GOLGI_NETWORK_VESICLE_BUDDING	Trans Golgi Network Vesicle Budding	67	0.3984	1.4418	0.0290023	0.105223	1	3230	tags=34%, list=22%, signal=44%
WikiPathways	WP_DRAVET_SYNDROME	Dravet Syndrome	21	0.4883	1.4407	0.0585106	0.173082	1	1771	tags=33%, list=12%, signal=38%
WikiPathways	WP_UROTENSINIIMEDIATED_SIGNALING	Urotensiniimediated Signaling	50	0.4134	1.4399	0.0386473	0.172732	1	1910	tags=24%, list=13%, signal=27%
WikiPathways	WP_IMMUNE_INFILTRATION_IN_PANCREATIC_CANCER	Immune Infiltration In Pancreatic Cancer	16	0.5345	1.4395	0.0605634	0.171878	1	3005	tags=44%, list=20%, signal=55%
WikiPathways	WP_SELENIUM_METABOLISM_AND_SELENOPROTEINS	Selenium Metabolism And Selenoproteins	40	0.4363	1.4392	0.0391414	0.170699	1	3626	tags=38%, list=25%, signal=50%
Hallmarks	HALLMARK_INFLAMMATORY_RESPONSE	Inflammatory Response	106	0.3799	1.4387	0.0175824	0.0400892	0.568	2274	tags=27%, list=15%, signal=32%
Reactome	REACTOME_VLDLR_INTERNALISATION_AND_DEGRADATION	Vldlr Internalisation And Degradation	15	0.5423	1.4386	0.0616438	0.107637	1	3127	tags=60%, list=21%, signal=76%
Reactome	REACTOME_TRANSCRIPTIONAL_REGULATION_BY_RUNX3	Transcriptional Regulation By Runx3	81	0.3857	1.4335	0.0213723	0.111639	1	4050	tags=46%, list=27%, signal=63%
WikiPathways	WP_16P112_DISTAL_DELETION_SYNDROME	16P112 Distal Deletion Syndrome	24	0.4751	1.4332	0.0652463	0.177099	1	2702	tags=46%, list=18%, signal=56%
WikiPathways	WP_CYTOKINECYTOKINE_RECEPTOR_INTERACTION	Cytokinecytokine Receptor Interaction	88	0.3832	1.4329	0.0271739	0.176057	1	931	tags=20%, list=6%, signal=22%
Reactome	REACTOME_RECRUITMENT_OF_NUMA_TO_MITOTIC_CENTROSOMES	Recruitment Of Numa To Mitotic Centrosomes	81	0.3874	1.4295	0.0260476	0.114809	1	3401	tags=35%, list=23%, signal=45%
Reactome	REACTOME_TOLL_LIKE_RECEPTOR_9_TLR9_CASCADE	Toll Like Receptor 9 Tlr9 Cascade	95	0.3766	1.4293	0.018847	0.114573	1	3127	tags=31%, list=21%, signal=38%
Reactome	REACTOME_MITOCHONDRIAL_PROTEIN_DEGRADATION	Mitochondrial Protein Degradation	84	0.3815	1.4283	0.0308031	0.115022	1	2463	tags=26%, list=17%, signal=31%
Reactome	REACTOME_CARGO_TRAFFICKING_TO_THE_PERICILIARY_MEMBRANE	Cargo Trafficking To The Periciliary Membrane	54	0.4102	1.4272	0.0451912	0.11564	1	3883	tags=33%, list=26%, signal=45%
Reactome	REACTOME_DENGUE_VIRUS_ATTACHMENT_AND_ENTRY	Dengue Virus Attachment And Entry	34	0.441	1.4269	0.0633714	0.115539	1	3515	tags=50%, list=24%, signal=65%
WikiPathways	WP_NEURODEGENERATION_WITH_BRAIN_IRON_ACCUMULATION_NBIA_SUBTYPES_PATHWAY	Neurodegeneration With Brain Iron Accumulation Nbia Subtypes Pathway	40	0.4294	1.4267	0.0484472	0.183269	1	3410	tags=35%, list=23%, signal=45%
WikiPathways	WP_HISTONE_MODIFICATIONS	Histone Modifications	58	0.4084	1.4266	0.0359212	0.181928	1	3432	tags=41%, list=23%, signal=54%
Reactome	REACTOME_E3_UBIQUITIN_LIGASES_UBIQUITINATE_TARGET_PROTEINS	E3 Ubiquitin Ligases Ubiquitinate Target Proteins	55	0.4077	1.4257	0.0324519	0.116249	1	3980	tags=44%, list=27%, signal=60%
Reactome	REACTOME_HSP90_CHAPERONE_CYCLE_FOR_STEROID_HORMONE_RECEPTORS_SHR_IN_THE_PRESENCE_OF_LIGAND	Hsp90 Chaperone Cycle For Steroid Hormone Receptors Shr In The Presence Of Ligand	44	0.4227	1.4228	0.0598504	0.118503	1	4035	tags=39%, list=27%, signal=53%
Reactome	REACTOME_NUCLEOTIDE_CATABOLISM	Nucleotide Catabolism	25	0.4739	1.4222	0.0757979	0.118636	1	3420	tags=36%, list=23%, signal=47%
Reactome	REACTOME_CASPASE_ACTIVATION_VIA_EXTRINSIC_APOPTOTIC_SIGNALLING_PATHWAY	Caspase Activation Via Extrinsic Apoptotic Signalling Pathway	18	0.5086	1.4204	0.0713324	0.119772	1	2206	tags=33%, list=15%, signal=39%
Reactome	REACTOME_IRON_UPTAKE_AND_TRANSPORT	Iron Uptake And Transport	48	0.4134	1.4197	0.0528846	0.120084	1	3804	tags=42%, list=26%, signal=56%
WikiPathways	WP_MITOCHONDRIAL_COMPLEX_III_ASSEMBLY	Mitochondrial Complex Iii Assembly	15	0.528	1.4193	0.0847458	0.19067	1	3340	tags=53%, list=23%, signal=69%
Reactome	REACTOME_FORMATION_OF_TC_NER_PRE_INCISION_COMPLEX	Formation Of Tc Ner Pre Incision Complex	49	0.4165	1.4189	0.0321812	0.120467	1	5157	tags=51%, list=35%, signal=78%
WikiPathways	WP_8Q1123_RB1CC1_COPY_NUMBER_VARIATION	8Q1123 Rb1Cc1 Copy Number Variation	15	0.529	1.4165	0.0930889	0.192842	1	3148	tags=40%, list=21%, signal=51%
Reactome	REACTOME_PHASE_II_CONJUGATION_OF_COMPOUNDS	Phase Ii Conjugation Of Compounds	49	0.4217	1.4159	0.0311377	0.122862	1	4817	tags=51%, list=33%, signal=75%
Reactome	REACTOME_DUAL_INCISION_IN_TC_NER	Dual Incision In Tc Ner	61	0.3963	1.4157	0.042007	0.12268	1	6082	tags=61%, list=41%, signal=103%
WikiPathways	WP_ALZHEIMERS_DISEASE_AND_MIRNA_EFFECTS	Alzheimers Disease And Mirna Effects	201	0.3504	1.4132	0.00717213	0.195906	1	3480	tags=33%, list=24%, signal=42%
Reactome	REACTOME_G_ALPHA_S_SIGNALLING_EVENTS	G Alpha S Signalling Events	58	0.3982	1.4123	0.041049	0.125611	1	2122	tags=28%, list=14%, signal=32%
Reactome	REACTOME_DEVELOPMENTAL_CELL_LINEAGES_OF_THE_EXOCRINE_PANCREAS	Developmental Cell Lineages Of The Exocrine Pancreas	30	0.4473	1.4122	0.0692308	0.125318	1	2143	tags=33%, list=15%, signal=39%
WikiPathways	WP_ALZHEIMERS_DISEASE	Alzheimers Disease	201	0.3504	1.412	0.00717213	0.196291	1	3480	tags=33%, list=24%, signal=42%
Reactome	REACTOME_CYTOSOLIC_SENSORS_OF_PATHOGEN_ASSOCIATED_DNA	Cytosolic Sensors Of Pathogen Associated Dna	59	0.3995	1.4104	0.0398593	0.126629	1	3277	tags=32%, list=22%, signal=41%
Reactome	REACTOME_INTERLEUKIN_6_FAMILY_SIGNALING	Interleukin 6 Family Signaling	16	0.5123	1.4088	0.0890805	0.127785	1	1167	tags=25%, list=8%, signal=27%
WikiPathways	WP_APOPTOSIS_REGULATION_BY_PARATHYROID_HORMONERELATED_PROTEIN	Apoptosis Regulation By Parathyroid Hormonerelated Protein	19	0.4995	1.4088	0.0832197	0.199644	1	2510	tags=47%, list=17%, signal=57%
Reactome	REACTOME_SIGNALING_BY_WNT	Signaling By Wnt	246	0.3392	1.4085	0.00609756	0.127724	1	4152	tags=41%, list=28%, signal=57%
Reactome	REACTOME_CHROMATIN_ORGANIZATION	Chromatin Organization	253	0.3433	1.4065	0.00406918	0.129304	1	3432	tags=34%, list=23%, signal=43%
WikiPathways	WP_HEPATITIS_C_AND_HEPATOCELLULAR_CARCINOMA	Hepatitis C And Hepatocellular Carcinoma	44	0.4153	1.406	0.0595533	0.202497	1	3228	tags=36%, list=22%, signal=46%
Reactome	REACTOME_RNA_POLYMERASE_III_CHAIN_ELONGATION	Rna Polymerase Iii Chain Elongation	18	0.5064	1.4028	0.0750341	0.132622	1	5589	tags=61%, list=38%, signal=98%
Reactome	REACTOME_FORMATION_OF_ATP_BY_CHEMIOSMOTIC_COUPLING	Formation Of Atp By Chemiosmotic Coupling	18	0.5001	1.4004	0.0975275	0.134472	1	5193	tags=50%, list=35%, signal=77%
Reactome	REACTOME_SIGNALING_BY_FGFR2_IIIA_TM	Signaling By Fgfr2 Iiia Tm	19	0.4917	1.3996	0.0809328	0.134772	1	2799	tags=47%, list=19%, signal=58%
Reactome	REACTOME_TRAF6_MEDIATED_NF_KB_ACTIVATION	Traf6 Mediated Nf Kb Activation	20	0.4905	1.3994	0.0788043	0.134575	1	580	tags=20%, list=4%, signal=21%
Reactome	REACTOME_ER_TO_GOLGI_ANTEROGRADE_TRANSPORT	Er To Golgi Anterograde Transport	130	0.3578	1.3992	0.0277778	0.134377	1	4562	tags=38%, list=31%, signal=54%
Reactome	REACTOME_DDX58_IFIH1_MEDIATED_INDUCTION_OF_INTERFERON_ALPHA_BETA	Ddx58 Ifih1 Mediated Induction Of Interferon Alpha Beta	59	0.3959	1.3983	0.0574053	0.134889	1	4355	tags=41%, list=30%, signal=57%
Reactome	REACTOME_APC_C_MEDIATED_DEGRADATION_OF_CELL_CYCLE_PROTEINS	Apc C Mediated Degradation Of Cell Cycle Proteins	73	0.3809	1.3972	0.0366133	0.135629	1	4890	tags=55%, list=33%, signal=82%
WikiPathways	WP_CHRONIC_HYPERGLYCEMIA_IMPAIRMENT_OF_NEURON_FUNCTION	Chronic Hyperglycemia Impairment Of Neuron Function	29	0.4452	1.396	0.0628342	0.215892	1	3205	tags=45%, list=22%, signal=57%
Reactome	REACTOME_ESTROGEN_DEPENDENT_NUCLEAR_EVENTS_DOWNSTREAM_OF_ESR_MEMBRANE_SIGNALING	Estrogen Dependent Nuclear Events Downstream Of Esr Membrane Signaling	18	0.5034	1.3958	0.0787717	0.136668	1	1124	tags=28%, list=8%, signal=30%
Reactome	REACTOME_MITOPHAGY	Mitophagy	37	0.427	1.3951	0.0766378	0.136998	1	4872	tags=46%, list=33%, signal=68%
Reactome	REACTOME_RHO_GTPASE_EFFECTORS	Rho Gtpase Effectors	272	0.3381	1.3942	0.00304569	0.137518	1	3574	tags=36%, list=24%, signal=47%
Reactome	REACTOME_G2_M_DNA_DAMAGE_CHECKPOINT	G2 M Dna Damage Checkpoint	81	0.3738	1.3923	0.036626	0.139082	1	4167	tags=38%, list=28%, signal=53%
Reactome	REACTOME_NOD1_2_SIGNALING_PATHWAY	Nod1 2 Signaling Pathway	31	0.4474	1.3911	0.0619355	0.139918	1	3228	tags=39%, list=22%, signal=49%
WikiPathways	WP_ONCOSTATIN_M_SIGNALING	Oncostatin M Signaling	62	0.3937	1.3909	0.0423826	0.221894	1	2182	tags=24%, list=15%, signal=28%
Reactome	REACTOME_EXTRACELLULAR_MATRIX_ORGANIZATION	Extracellular Matrix Organization	203	0.3431	1.3903	0.00719425	0.140353	1	3717	tags=39%, list=25%, signal=51%
WikiPathways	WP_CARDIAC_HYPERTROPHIC_RESPONSE	Cardiac Hypertrophic Response	49	0.406	1.39	0.058264	0.221449	1	1327	tags=24%, list=9%, signal=27%
WikiPathways	WP_METABOLIC_PATHWAYS_OF_FIBROBLASTS	Metabolic Pathways Of Fibroblasts	29	0.4467	1.3899	0.0785805	0.219975	1	2741	tags=38%, list=19%, signal=46%
Reactome	REACTOME_ASSOCIATION_OF_TRIC_CCT_WITH_TARGET_PROTEINS_DURING_BIOSYNTHESIS	Association Of Tric Cct With Target Proteins During Biosynthesis	35	0.4321	1.3892	0.0649189	0.141111	1	1746	tags=23%, list=12%, signal=26%
Reactome	REACTOME_SIGNALING_BY_NTRKS	Signaling By Ntrks	107	0.3662	1.3882	0.0240964	0.141794	1	2433	tags=30%, list=16%, signal=36%
Reactome	REACTOME_MICRORNA_MIRNA_BIOGENESIS	Microrna Mirna Biogenesis	24	0.4568	1.3881	0.081117	0.141474	1	2799	tags=38%, list=19%, signal=46%
WikiPathways	WP_RNAPOLYMERASE_II_TRANSCRIPTION_THE_PREINITIATION_COMPLEX	Rnapolymerase Ii Transcription The Preinitiation Complex	66	0.3894	1.3871	0.0375427	0.22264	1	4590	tags=44%, list=31%, signal=63%
Reactome	REACTOME_APOPTOSIS	Apoptosis	144	0.352	1.3863	0.0221286	0.14293	1	3644	tags=35%, list=25%, signal=47%
WikiPathways	WP_IL17_SIGNALING	Il17 Signaling	25	0.4614	1.3858	0.0906631	0.222944	1	784	tags=24%, list=5%, signal=25%
Hallmarks	HALLMARK_PI3K_AKT_MTOR_SIGNALING	Pi3K Akt Mtor Signaling	87	0.3705	1.3857	0.0379041	0.0656332	0.768	2452	tags=30%, list=17%, signal=36%
Reactome	REACTOME_BACTERIAL_INFECTION_PATHWAYS	Bacterial Infection Pathways	81	0.3708	1.3854	0.0463801	0.143466	1	3127	tags=33%, list=21%, signal=42%
Reactome	REACTOME_S_PHASE	S Phase	145	0.352	1.385	0.0209644	0.143518	1	4050	tags=39%, list=27%, signal=54%
WikiPathways	WP_TYROBP_CAUSAL_NETWORK_IN_MICROGLIA	Tyrobp Causal Network In Microglia	32	0.4409	1.385	0.0773333	0.222514	1	3849	tags=44%, list=26%, signal=59%
Reactome	REACTOME_CRISTAE_FORMATION	Cristae Formation	31	0.4459	1.3849	0.0786241	0.143202	1	5193	tags=42%, list=35%, signal=65%
Reactome	REACTOME_SARS_COV_1_HOST_INTERACTIONS	Sars Cov 1 Host Interactions	81	0.3724	1.3836	0.0424107	0.144218	1	4637	tags=46%, list=31%, signal=66%
Reactome	REACTOME_GLYCOSAMINOGLYCAN_PROTEIN_LINKAGE_REGION_BIOSYNTHESIS	Glycosaminoglycan Protein Linkage Region Biosynthesis	24	0.458	1.3823	0.0784574	0.14528	1	3515	tags=50%, list=24%, signal=66%
WikiPathways	WP_SMALL_CELL_LUNG_CANCER	Small Cell Lung Cancer	82	0.3737	1.3816	0.0490524	0.226505	1	3228	tags=35%, list=22%, signal=45%
WikiPathways	WP_CONSTITUTIVE_ANDROSTANE_RECEPTOR_PATHWAY	Constitutive Androstane Receptor Pathway	17	0.501	1.3808	0.11641	0.226097	1	1844	tags=35%, list=12%, signal=40%
Reactome	REACTOME_SIGNALLING_TO_ERKS	Signalling To Erks	27	0.4496	1.3802	0.0929032	0.147216	1	2433	tags=37%, list=16%, signal=44%
Reactome	REACTOME_NUCLEOTIDE_EXCISION_REPAIR	Nucleotide Excision Repair	104	0.3586	1.3797	0.0340285	0.147306	1	5908	tags=52%, list=40%, signal=86%
Reactome	REACTOME_M_PHASE	M Phase	370	0.3323	1.3778	0.00100705	0.148981	1	4160	tags=39%, list=28%, signal=53%
Reactome	REACTOME_MITOTIC_G1_PHASE_AND_G1_S_TRANSITION	Mitotic G1 Phase And G1 S Transition	130	0.3504	1.3767	0.0337197	0.149782	1	4050	tags=41%, list=27%, signal=56%
WikiPathways	WP_NGLYCAN_BIOSYNTHESIS	Nglycan Biosynthesis	54	0.3957	1.3754	0.0524476	0.23311	1	3829	tags=41%, list=26%, signal=55%
Reactome	REACTOME_DISEASES_ASSOCIATED_WITH_N_GLYCOSYLATION_OF_PROTEINS	Diseases Associated With N Glycosylation Of Proteins	19	0.4879	1.3744	0.106849	0.151686	1	3281	tags=37%, list=22%, signal=47%
Reactome	REACTOME_METABOLISM_OF_VITAMINS_AND_COFACTORS	Metabolism Of Vitamins And Cofactors	147	0.3492	1.3739	0.0198123	0.151732	1	4193	tags=36%, list=28%, signal=50%
Reactome	REACTOME_HEMOSTASIS	Hemostasis	395	0.3284	1.3731	0.00100402	0.152171	1	2924	tags=29%, list=20%, signal=35%
Reactome	REACTOME_NEGATIVE_REGULATION_OF_MAPK_PATHWAY	Negative Regulation Of Mapk Pathway	41	0.4161	1.3718	0.0700246	0.153294	1	3509	tags=37%, list=24%, signal=48%
Reactome	REACTOME_G_ALPHA_I_SIGNALLING_EVENTS	G Alpha I Signalling Events	116	0.3563	1.371	0.0271739	0.1538	1	3455	tags=33%, list=23%, signal=42%
Reactome	REACTOME_DISEASES_OF_GLYCOSYLATION	Diseases Of Glycosylation	95	0.3613	1.3703	0.0449069	0.154191	1	3758	tags=41%, list=25%, signal=55%
Reactome	REACTOME_GPCR_LIGAND_BINDING	Gpcr Ligand Binding	93	0.3635	1.3694	0.0318681	0.154842	1	3455	tags=35%, list=23%, signal=46%
Reactome	REACTOME_SARS_COV_1_INFECTION	Sars Cov 1 Infection	124	0.3488	1.3679	0.032839	0.156144	1	3775	tags=36%, list=26%, signal=48%
Reactome	REACTOME_TRNA_MODIFICATION_IN_THE_NUCLEUS_AND_CYTOSOL	Trna Modification In The Nucleus And Cytosol	42	0.4079	1.367	0.0683761	0.156759	1	2142	tags=26%, list=15%, signal=31%
Hallmarks	HALLMARK_MYC_TARGETS_V2	Myc Targets V2	56	0.3955	1.3669	0.0491228	0.0745624	0.833	4653	tags=50%, list=32%, signal=73%
Reactome	REACTOME_METABOLISM_OF_COFACTORS	Metabolism Of Cofactors	21	0.4701	1.3666	0.104359	0.156637	1	4059	tags=38%, list=28%, signal=52%
Reactome	REACTOME_DISEASES_OF_IMMUNE_SYSTEM	Diseases Of Immune System	21	0.4767	1.3659	0.0929615	0.157096	1	990	tags=19%, list=7%, signal=20%
WikiPathways	WP_EFFECT_OF_DASATINIB_ON_THE_BCRABL_SIGNALING_PATHWAY	Effect Of Dasatinib On The Bcrabl Signaling Pathway	38	0.4197	1.3658	0.0710723	0.247115	1	1333	tags=29%, list=9%, signal=32%
Reactome	REACTOME_SIGNALING_BY_THE_B_CELL_RECEPTOR_BCR	Signaling By The B Cell Receptor Bcr	86	0.3622	1.3657	0.0614035	0.156829	1	4403	tags=45%, list=30%, signal=64%
WikiPathways	WP_SOX_GENES_AND_THEIR_INFLUENCE_ON_NEUROGENESIS_AND_NEURODEVELOPMENTAL_DISORDERS	Sox Genes And Their Influence On Neurogenesis And Neurodevelopmental Disorders	18	0.4869	1.3655	0.10153	0.245738	1	3581	tags=67%, list=24%, signal=88%
Reactome	REACTOME_SYNTHESIS_OF_SUBSTRATES_IN_N_GLYCAN_BIOSYTHESIS	Synthesis Of Substrates In N Glycan Biosythesis	53	0.3966	1.3644	0.0636574	0.157878	1	4032	tags=51%, list=27%, signal=70%
WikiPathways	WP_APOPTOSIS	Apoptosis	71	0.3758	1.364	0.0622877	0.24662	1	2452	tags=30%, list=17%, signal=35%
WikiPathways	WP_ATM_SIGNALING_IN_DEVELOPMENT_AND_DISEASE	Atm Signaling In Development And Disease	44	0.4044	1.3628	0.0708283	0.24675	1	2803	tags=27%, list=19%, signal=34%
WikiPathways	WP_REGULATORY_CIRCUITS_OF_STAT3_SIGNALING	Regulatory Circuits Of Stat3 Signaling	50	0.3992	1.3606	0.0833333	0.248784	1	3112	tags=36%, list=21%, signal=45%
Reactome	REACTOME_UNFOLDED_PROTEIN_RESPONSE_UPR	Unfolded Protein Response Upr	86	0.3637	1.3597	0.0513967	0.16279	1	3005	tags=29%, list=20%, signal=36%
WikiPathways	WP_PI3KAKTMTOR_VITAMIN_D3_SIGNALING	Pi3Kaktmtor Vitamin D3 Signaling	16	0.4998	1.3565	0.10452	0.254058	1	1911	tags=31%, list=13%, signal=36%
Reactome	REACTOME_TCR_SIGNALING	Tcr Signaling	77	0.3696	1.356	0.0513699	0.166555	1	4302	tags=45%, list=29%, signal=64%
Reactome	REACTOME_PINK1_PRKN_MEDIATED_MITOPHAGY	Pink1 Prkn Mediated Mitophagy	30	0.4216	1.3548	0.10105	0.167415	1	4692	tags=43%, list=32%, signal=63%
WikiPathways	WP_MICRORNAS_IN_CARDIOMYOCYTE_HYPERTROPHY	Micrornas In Cardiomyocyte Hypertrophy	74	0.3686	1.3545	0.0621404	0.255978	1	2939	tags=31%, list=20%, signal=39%
Reactome	REACTOME_BIOSYNTHESIS_OF_THE_N_GLYCAN_PRECURSOR_DOLICHOL_LIPID_LINKED_OLIGOSACCHARIDE_LLO_AND_TRANSFER_TO_A_NASCENT_PROTEIN	Biosynthesis Of The N Glycan Precursor Dolichol Lipid Linked Oligosaccharide Llo And Transfer To A Nascent Protein	68	0.3767	1.3541	0.0590278	0.167714	1	4032	tags=46%, list=27%, signal=62%
WikiPathways	WP_IL26_SIGNALING	Il26 Signaling	33	0.4242	1.3522	0.0885287	0.258353	1	2022	tags=30%, list=14%, signal=35%
WikiPathways	WP_TCELL_ANTIGEN_RECEPTOR_TCR_PATHWAY_DURING_STAPHYLOCOCCUS_AUREUS_INFECTION	Tcell Antigen Receptor Tcr Pathway During Staphylococcus Aureus Infection	43	0.406	1.352	0.0923645	0.257115	1	729	tags=19%, list=5%, signal=20%
Hallmarks	HALLMARK_INTERFERON_ALPHA_RESPONSE	Interferon Alpha Response	72	0.3741	1.3512	0.0566251	0.084075	0.876	3805	tags=39%, list=26%, signal=52%
Reactome	REACTOME_INTERCONVERSION_OF_NUCLEOTIDE_DI_AND_TRIPHOSPHATES	Interconversion Of Nucleotide Di And Triphosphates	24	0.4509	1.3499	0.111409	0.172106	1	2371	tags=33%, list=16%, signal=40%
Reactome	REACTOME_TRANSLATION_OF_SARS_COV_1_STRUCTURAL_PROTEINS	Translation Of Sars Cov 1 Structural Proteins	29	0.4325	1.3489	0.109276	0.172912	1	3127	tags=45%, list=21%, signal=57%
Reactome	REACTOME_ACTIVATED_TAK1_MEDIATES_P38_MAPK_ACTIVATION	Activated Tak1 Mediates P38 Mapk Activation	21	0.4654	1.3476	0.104683	0.174146	1	3127	tags=43%, list=21%, signal=54%
WikiPathways	WP_INSULIN_SIGNALING	Insulin Signaling	138	0.3367	1.3468	0.0392781	0.264	1	3256	tags=34%, list=22%, signal=43%
Reactome	REACTOME_COMPLEX_III_ASSEMBLY	Complex Iii Assembly	23	0.4549	1.3441	0.129458	0.177917	1	5215	tags=61%, list=35%, signal=94%
Reactome	REACTOME_RNA_POLYMERASE_III_TRANSCRIPTION_INITIATION_FROM_TYPE_3_PROMOTER	Rna Polymerase Iii Transcription Initiation From Type 3 Promoter	27	0.4374	1.3438	0.115334	0.177828	1	5589	tags=56%, list=38%, signal=89%
Reactome	REACTOME_COLLAGEN_CHAIN_TRIMERIZATION	Collagen Chain Trimerization	23	0.4562	1.3431	0.0911458	0.178169	1	2843	tags=48%, list=19%, signal=59%
WikiPathways	WP_TYROSINE_KINASE_INHIBITORS_IN_GLIOBLASTOMA	Tyrosine Kinase Inhibitors In Glioblastoma	20	0.4635	1.3427	0.138418	0.269618	1	1957	tags=30%, list=13%, signal=35%
Reactome	REACTOME_CLATHRIN_MEDIATED_ENDOCYTOSIS	Clathrin Mediated Endocytosis	116	0.3516	1.3426	0.0410367	0.178316	1	3481	tags=34%, list=24%, signal=44%
WikiPathways	WP_OPIOID_RECEPTOR_PATHWAYS	Opioid Receptor Pathways	30	0.4288	1.3416	0.0878113	0.269906	1	831	tags=20%, list=6%, signal=21%
WikiPathways	WP_INTERLEUKIN1_IL1_STRUCTURAL_PATHWAY	Interleukin1 Il1 Structural Pathway	47	0.3857	1.3414	0.0916767	0.268443	1	3120	tags=34%, list=21%, signal=43%
WikiPathways	WP_16P112_PROXIMAL_DELETION_SYNDROME	16P112 Proximal Deletion Syndrome	58	0.3752	1.3399	0.0726191	0.269305	1	2123	tags=26%, list=14%, signal=30%
WikiPathways	WP_EGFR_TYROSINE_KINASE_INHIBITOR_RESISTANCE	Egfr Tyrosine Kinase Inhibitor Resistance	74	0.3647	1.3398	0.0677966	0.267855	1	2410	tags=31%, list=16%, signal=37%
Reactome	REACTOME_TP53_REGULATES_TRANSCRIPTION_OF_GENES_INVOLVED_IN_CYTOCHROME_C_RELEASE	Tp53 Regulates Transcription Of Genes Involved In Cytochrome C Release	17	0.4786	1.3367	0.12605	0.185207	1	1206	tags=29%, list=8%, signal=32%
WikiPathways	WP_SARSCOV2_MITOCHONDRIAL_CHRONIC_OXIDATIVE_STRESS_AND_ENDOTHELIAL_DYSFUNCTION	Sarscov2 Mitochondrial Chronic Oxidative Stress And Endothelial Dysfunction	18	0.4755	1.3364	0.120226	0.27204	1	3972	tags=44%, list=27%, signal=61%
WikiPathways	WP_17Q12_COPY_NUMBER_VARIATION_SYNDROME	17Q12 Copy Number Variation Syndrome	30	0.4216	1.3357	0.108108	0.271315	1	2348	tags=30%, list=16%, signal=36%
Reactome	REACTOME_TURBULENT_OSCILLATORY_DISTURBED_FLOW_SHEAR_STRESS_ACTIVATES_SIGNALING_BY_PIEZO1_AND_INTEGRINS_IN_ENDOTHELIAL_CELLS	Turbulent Oscillatory Disturbed Flow Shear Stress Activates Signaling By Piezo1 And Integrins In Endothelial Cells	29	0.4304	1.3356	0.111111	0.186098	1	4465	tags=52%, list=30%, signal=74%
Reactome	REACTOME_PCNA_DEPENDENT_LONG_PATCH_BASE_EXCISION_REPAIR	Pcna Dependent Long Patch Base Excision Repair	21	0.4554	1.3343	0.105405	0.187307	1	5908	tags=62%, list=40%, signal=103%
Reactome	REACTOME_MITOTIC_G2_G2_M_PHASES	Mitotic G2 G2 M Phases	173	0.3342	1.3321	0.0331263	0.1895	1	4050	tags=39%, list=27%, signal=53%
Reactome	REACTOME_CLASS_A_1_RHODOPSIN_LIKE_RECEPTORS	Class A 1 Rhodopsin Like Receptors	65	0.369	1.3307	0.0869565	0.190874	1	3455	tags=37%, list=23%, signal=48%
Reactome	REACTOME_CIRCADIAN_CLOCK	Circadian Clock	98	0.348	1.3301	0.0629834	0.191131	1	4872	tags=50%, list=33%, signal=74%
WikiPathways	WP_INTEGRINMEDIATED_CELL_ADHESION	Integrinmediated Cell Adhesion	83	0.3597	1.3296	0.0731982	0.280668	1	3647	tags=41%, list=25%, signal=54%
WikiPathways	WP_HALLMARK_OF_CANCER_SUSTAINING_PROLIFERATIVE_SIGNALING	Hallmark Of Cancer Sustaining Proliferative Signaling	83	0.3579	1.329	0.0628571	0.280131	1	2718	tags=33%, list=18%, signal=40%
WikiPathways	WP_GENES_CONTROLLING_NEPHROGENESIS	Genes Controlling Nephrogenesis	29	0.4222	1.3262	0.106516	0.283446	1	1475	tags=24%, list=10%, signal=27%
WikiPathways	WP_RELATIONSHIP_BETWEEN_INFLAMMATION_COX2_AND_EGFR	Relationship Between Inflammation Cox2 And Egfr	18	0.475	1.3257	0.132626	0.282509	1	2410	tags=44%, list=16%, signal=53%
Reactome	REACTOME_RHO_GTPASES_ACTIVATE_CIT	Rho Gtpases Activate Cit	17	0.4787	1.3256	0.14346	0.196363	1	1338	tags=29%, list=9%, signal=32%
WikiPathways	WP_TRANSSULFURATION_ONECARBON_METABOLISM_AND_RELATED_PATHWAYS	Transsulfuration Onecarbon Metabolism And Related Pathways	47	0.3926	1.3226	0.0991637	0.286465	1	3013	tags=32%, list=20%, signal=40%
Reactome	REACTOME_MAP3K8_TPL2_DEPENDENT_MAPK1_3_ACTIVATION	Map3K8 Tpl2 Dependent Mapk1 3 Activation	16	0.4857	1.3221	0.127325	0.200545	1	3127	tags=31%, list=21%, signal=40%
WikiPathways	WP_OXIDATIVE_DAMAGE_RESPONSE	Oxidative Damage Response	29	0.4282	1.3216	0.120936	0.286318	1	2420	tags=34%, list=16%, signal=41%
WikiPathways	WP_FAMILIAL_PARTIAL_LIPODYSTROPHY	Familial Partial Lipodystrophy	21	0.4437	1.32	0.147059	0.287818	1	2541	tags=33%, list=17%, signal=40%
Reactome	REACTOME_SIGNALING_BY_RETINOIC_ACID	Signaling By Retinoic Acid	25	0.4418	1.3195	0.109354	0.203495	1	1796	tags=24%, list=12%, signal=27%
WikiPathways	WP_ALSTROM_SYNDROME	Alstrom Syndrome	29	0.4266	1.3166	0.125802	0.292252	1	3001	tags=34%, list=20%, signal=43%
WikiPathways	WP_EXTRACELLULAR_VESICLES_IN_THE_CROSSTALK_OF_CARDIAC_CELLS	Extracellular Vesicles In The Crosstalk Of Cardiac Cells	16	0.4827	1.3159	0.145138	0.292035	1	2080	tags=38%, list=14%, signal=44%
Reactome	REACTOME_SIGNALING_BY_GPCR	Signaling By Gpcr	265	0.3188	1.3157	0.0262892	0.208057	1	3455	tags=32%, list=23%, signal=42%
Reactome	REACTOME_MRNA_SPLICING_MINOR_PATHWAY	Mrna Splicing Minor Pathway	49	0.3798	1.3149	0.0991637	0.208691	1	4830	tags=45%, list=33%, signal=67%
Reactome	REACTOME_PROCESSIVE_SYNTHESIS_ON_THE_LAGGING_STRAND	Processive Synthesis On The Lagging Strand	15	0.489	1.3134	0.140845	0.210185	1	3706	tags=47%, list=25%, signal=62%
Reactome	REACTOME_PKR_MEDIATED_SIGNALING	Pkr Mediated Signaling	63	0.3725	1.3124	0.0983607	0.211031	1	3174	tags=30%, list=22%, signal=38%
WikiPathways	WP_HOSTPATHOGEN_INTERACTION_OF_HUMAN_CORONAVIRUSES_MAPK_SIGNALING	Hostpathogen Interaction Of Human Coronaviruses Mapk Signaling	33	0.4134	1.311	0.120101	0.299327	1	2819	tags=36%, list=19%, signal=45%
WikiPathways	WP_EUKARYOTIC_TRANSCRIPTION_INITIATION	Eukaryotic Transcription Initiation	38	0.399	1.3093	0.114673	0.300497	1	5103	tags=47%, list=35%, signal=72%
WikiPathways	WP_NRP1TRIGGERED_SIGNALING_IN_PANCREATIC_CANCER	Nrp1Triggered Signaling In Pancreatic Cancer	44	0.3841	1.3079	0.109916	0.301184	1	2869	tags=34%, list=19%, signal=42%
WikiPathways	WP_TARGETED_AGENTS_IN_TRIPLE_NEGATIVE_BREAST_CANCER	Targeted Agents In Triple Negative Breast Cancer	35	0.4071	1.3056	0.118227	0.303663	1	2534	tags=34%, list=17%, signal=41%
Reactome	REACTOME_ASPARAGINE_N_LINKED_GLYCOSYLATION	Asparagine N Linked Glycosylation	264	0.3197	1.3054	0.0272452	0.220043	1	4075	tags=35%, list=28%, signal=47%
WikiPathways	WP_CAMKK2_PATHWAY	Camkk2 Pathway	79	0.3547	1.3049	0.0765766	0.303326	1	3445	tags=38%, list=23%, signal=49%
Reactome	REACTOME_HIV_LIFE_CYCLE	Hiv Life Cycle	139	0.3337	1.3035	0.0577731	0.222206	1	3775	tags=31%, list=26%, signal=41%
Reactome	REACTOME_RRNA_PROCESSING_IN_THE_MITOCHONDRION	Rrna Processing In The Mitochondrion	16	0.4772	1.3035	0.14965	0.221676	1	5727	tags=56%, list=39%, signal=92%
WikiPathways	WP_GROWTH_FACTORS_AND_HORMONES_IN_BETA_CELL_PROLIFERATION	Growth Factors And Hormones In Beta Cell Proliferation	21	0.4502	1.3027	0.132333	0.30533	1	1164	tags=33%, list=8%, signal=36%
WikiPathways	WP_MYOMETRIAL_RELAXATION_AND_CONTRACTION_PATHWAYS	Myometrial Relaxation And Contraction Pathways	103	0.3357	1.3026	0.0860215	0.303849	1	3429	tags=33%, list=23%, signal=43%
Reactome	REACTOME_IKK_COMPLEX_RECRUITMENT_MEDIATED_BY_RIP1	Ikk Complex Recruitment Mediated By Rip1	19	0.452	1.3023	0.14876	0.22272	1	3127	tags=32%, list=21%, signal=40%
Reactome	REACTOME_RESOLUTION_OF_AP_SITES_VIA_THE_MULTIPLE_NUCLEOTIDE_PATCH_REPLACEMENT_PATHWAY	Resolution Of Ap Sites Via The Multiple Nucleotide Patch Replacement Pathway	25	0.4356	1.3005	0.124339	0.224631	1	5908	tags=56%, list=40%, signal=93%
Reactome	REACTOME_INTRACELLULAR_SIGNALING_BY_SECOND_MESSENGERS	Intracellular Signaling By Second Messengers	239	0.318	1.3004	0.0314083	0.224159	1	3228	tags=31%, list=22%, signal=40%
WikiPathways	WP_RAC1PAK1P38MMP2_PATHWAY	Rac1Pak1P38Mmp2 Pathway	58	0.3676	1.3003	0.100585	0.306424	1	1916	tags=24%, list=13%, signal=28%
WikiPathways	WP_SENESCENCE_AND_AUTOPHAGY_IN_CANCER	Senescence And Autophagy In Cancer	88	0.3448	1.3002	0.0953437	0.30471	1	1895	tags=22%, list=13%, signal=25%
Reactome	REACTOME_MAPK1_MAPK3_SIGNALING	Mapk1 Mapk3 Signaling	192	0.3257	1.2992	0.0461538	0.225418	1	3667	tags=35%, list=25%, signal=47%
Reactome	REACTOME_DNA_DAMAGE_RECOGNITION_IN_GG_NER	Dna Damage Recognition In Gg Ner	36	0.3987	1.299	0.121891	0.225271	1	5546	tags=50%, list=38%, signal=80%
WikiPathways	WP_WHITE_FAT_CELL_DIFFERENTIATION	White Fat Cell Differentiation	24	0.4393	1.2981	0.140604	0.307155	1	3109	tags=42%, list=21%, signal=53%
WikiPathways	WP_22Q112_DISTAL_CNV	22Q112 Distal Cnv	113	0.337	1.2971	0.0816105	0.307439	1	4637	tags=39%, list=31%, signal=56%
Reactome	REACTOME_GPER1_SIGNALING	Gper1 Signaling	31	0.4074	1.297	0.140645	0.227461	1	1333	tags=26%, list=9%, signal=28%
Reactome	REACTOME_DENGUE_VIRUS_ACTIVATES_MODULATES_INNATE_AND_ADAPTIVE_IMMUNE_RESPONSES	Dengue Virus Activates Modulates Innate And Adaptive Immune Responses	21	0.4462	1.2963	0.156463	0.228039	1	1550	tags=19%, list=11%, signal=21%
Reactome	REACTOME_TP53_REGULATES_TRANSCRIPTION_OF_DNA_REPAIR_GENES	Tp53 Regulates Transcription Of Dna Repair Genes	57	0.3699	1.2954	0.111645	0.228646	1	3195	tags=30%, list=22%, signal=38%
Reactome	REACTOME_GLYCEROPHOSPHOLIPID_BIOSYNTHESIS	Glycerophospholipid Biosynthesis	93	0.3415	1.2949	0.0822368	0.228828	1	3518	tags=35%, list=24%, signal=46%
Reactome	REACTOME_PROTEIN_UBIQUITINATION	Protein Ubiquitination	75	0.3514	1.294	0.0976163	0.229668	1	3980	tags=37%, list=27%, signal=51%
WikiPathways	WP_VEGFAVEGFR2_SIGNALING	Vegfavegfr2 Signaling	374	0.3087	1.2938	0.0100301	0.31141	1	3676	tags=32%, list=25%, signal=41%
Reactome	REACTOME_INFECTION_WITH_MYCOBACTERIUM_TUBERCULOSIS	Infection With Mycobacterium Tuberculosis	21	0.4359	1.2932	0.165312	0.230214	1	4377	tags=48%, list=30%, signal=68%
Reactome	REACTOME_TP53_REGULATES_TRANSCRIPTION_OF_CELL_DEATH_GENES	Tp53 Regulates Transcription Of Cell Death Genes	34	0.4018	1.2931	0.146012	0.229819	1	1895	tags=26%, list=13%, signal=30%
WikiPathways	WP_OREXIN_RECEPTOR_PATHWAY	Orexin Receptor Pathway	136	0.3308	1.2918	0.0631579	0.313474	1	3668	tags=32%, list=25%, signal=43%
Reactome	REACTOME_COMPLEMENT_CASCADE	Complement Cascade	15	0.4892	1.2911	0.147059	0.232137	1	1757	tags=33%, list=12%, signal=38%
Reactome	REACTOME_FORMATION_OF_RNA_POL_II_ELONGATION_COMPLEX	Formation Of Rna Pol Ii Elongation Complex	53	0.3702	1.2889	0.102837	0.234802	1	3294	tags=32%, list=22%, signal=41%
Reactome	REACTOME_NEGATIVE_REGULATORS_OF_DDX58_IFIH1_SIGNALING	Negative Regulators Of Ddx58 Ifih1 Signaling	31	0.4083	1.2888	0.151282	0.234497	1	4355	tags=48%, list=30%, signal=69%
WikiPathways	WP_SYNAPTIC_VESICLE_PATHWAY	Synaptic Vesicle Pathway	27	0.4181	1.2887	0.153846	0.317212	1	3068	tags=41%, list=21%, signal=51%
Reactome	REACTOME_NERVOUS_SYSTEM_DEVELOPMENT	Nervous System Development	444	0.3074	1.2884	0.007	0.234438	1	3639	tags=35%, list=25%, signal=45%
Reactome	REACTOME_SMOOTH_MUSCLE_CONTRACTION	Smooth Muscle Contraction	27	0.4229	1.2871	0.134271	0.235678	1	3717	tags=48%, list=25%, signal=64%
WikiPathways	WP_PRIMARY_FOCAL_SEGMENTAL_GLOMERULOSCLEROSIS_FSGS	Primary Focal Segmental Glomerulosclerosis Fsgs	54	0.3647	1.2865	0.122286	0.319511	1	2251	tags=28%, list=15%, signal=33%
WikiPathways	WP_MIRNA_REGULATION_OF_PROSTATE_CANCER_SIGNALING	Mirna Regulation Of Prostate Cancer Signaling	28	0.4128	1.2862	0.15544	0.31823	1	1583	tags=25%, list=11%, signal=28%
WikiPathways	WP_PYRIMIDINE_METABOLISM	Pyrimidine Metabolism	73	0.3493	1.2855	0.099422	0.317937	1	4047	tags=34%, list=27%, signal=47%
WikiPathways	WP_IRONSULFUR_CLUSTER_BIOGENESIS	Ironsulfur Cluster Biogenesis	15	0.4874	1.2848	0.146377	0.31763	1	4936	tags=60%, list=33%, signal=90%
Reactome	REACTOME_L1CAM_INTERACTIONS	L1Cam Interactions	87	0.3445	1.2839	0.083151	0.239914	1	3373	tags=38%, list=23%, signal=49%
Reactome	REACTOME_NEGATIVE_REGULATION_OF_FGFR3_SIGNALING	Negative Regulation Of Fgfr3 Signaling	20	0.4485	1.2824	0.157543	0.241598	1	3127	tags=40%, list=21%, signal=51%
Reactome	REACTOME_PI3K_AKT_SIGNALING_IN_CANCER	Pi3K Akt Signaling In Cancer	72	0.3582	1.2822	0.0888383	0.241417	1	2495	tags=33%, list=17%, signal=40%
Reactome	REACTOME_RNA_POLYMERASE_I_TRANSCRIPTION_TERMINATION	Rna Polymerase I Transcription Termination	28	0.4165	1.2819	0.126138	0.241343	1	2542	tags=29%, list=17%, signal=34%
Reactome	REACTOME_GASTRULATION	Gastrulation	77	0.3456	1.2812	0.110491	0.241884	1	4302	tags=47%, list=29%, signal=66%
Reactome	REACTOME_NUCLEAR_EVENTS_KINASE_AND_TRANSCRIPTION_FACTOR_ACTIVATION	Nuclear Events Kinase And Transcription Factor Activation	52	0.3705	1.2807	0.132941	0.242099	1	3219	tags=35%, list=22%, signal=44%
Reactome	REACTOME_COPI_DEPENDENT_GOLGI_TO_ER_RETROGRADE_TRAFFIC	Copi Dependent Golgi To Er Retrograde Traffic	80	0.3496	1.2796	0.107383	0.243234	1	2950	tags=31%, list=20%, signal=39%
WikiPathways	WP_SMITHMAGENIS_AND_POTOCKILUPSKI_SYNDROME_COPY_NUMBER_VARIATION	Smithmagenis And Potockilupski Syndrome Copy Number Variation	130	0.3274	1.2795	0.0861141	0.326035	1	3148	tags=28%, list=21%, signal=36%
Reactome	REACTOME_DISORDERS_OF_TRANSMEMBRANE_TRANSPORTERS	Disorders Of Transmembrane Transporters	114	0.3327	1.2793	0.0804721	0.243119	1	4149	tags=41%, list=28%, signal=57%
Reactome	REACTOME_CELL_SURFACE_INTERACTIONS_AT_THE_VASCULAR_WALL	Cell Surface Interactions At The Vascular Wall	71	0.3492	1.2789	0.103955	0.243204	1	2329	tags=27%, list=16%, signal=32%
WikiPathways	WP_IL19_SIGNALING	Il19 Signaling	20	0.4521	1.2782	0.155245	0.326579	1	3717	tags=45%, list=25%, signal=60%
Hallmarks	HALLMARK_ANGIOGENESIS	Angiogenesis	24	0.4267	1.277	0.161206	0.156249	0.985	1600	tags=29%, list=11%, signal=33%
Reactome	REACTOME_PEROXISOMAL_LIPID_METABOLISM	Peroxisomal Lipid Metabolism	23	0.4378	1.2764	0.148594	0.246358	1	757	tags=17%, list=5%, signal=18%
Reactome	REACTOME_TRANSPORT_TO_THE_GOLGI_AND_SUBSEQUENT_MODIFICATION	Transport To The Golgi And Subsequent Modification	154	0.3227	1.2762	0.0672976	0.245981	1	4562	tags=36%, list=31%, signal=52%
WikiPathways	WP_VITAMIN_D_RECEPTOR_PATHWAY	Vitamin D Receptor Pathway	90	0.3359	1.2759	0.10838	0.329136	1	3690	tags=36%, list=25%, signal=47%
Reactome	REACTOME_PD_L1_CD274_GLYCOSYLATION_AND_TRANSLOCATION_TO_PLASMA_MEMBRANE	Pd L1 Cd274 Glycosylation And Translocation To Plasma Membrane	17	0.4523	1.2752	0.170564	0.247041	1	4453	tags=47%, list=30%, signal=67%
WikiPathways	WP_13Q1212_COPY_NUMBER_VARIATION	13Q1212 Copy Number Variation	27	0.4108	1.2748	0.157407	0.329463	1	222	tags=15%, list=2%, signal=15%
Reactome	REACTOME_TRP_CHANNELS	Trp Channels	17	0.4643	1.2736	0.183119	0.248972	1	3126	tags=41%, list=21%, signal=52%
Reactome	REACTOME_THROMBIN_SIGNALLING_THROUGH_PROTEINASE_ACTIVATED_RECEPTORS_PARS	Thrombin Signalling Through Proteinase Activated Receptors Pars	21	0.4409	1.2731	0.170124	0.249096	1	1131	tags=24%, list=8%, signal=26%
WikiPathways	WP_COMPLEMENT_SYSTEM_IN_NEURONAL_DEVELOPMENT_AND_PLASTICITY	Complement System In Neuronal Development And Plasticity	59	0.3613	1.2724	0.114352	0.332398	1	2626	tags=25%, list=18%, signal=31%
Reactome	REACTOME_EARLY_SARS_COV_2_INFECTION_EVENTS	Early Sars Cov 2 Infection Events	32	0.4023	1.2719	0.164103	0.250321	1	3775	tags=38%, list=26%, signal=50%
Hallmarks	HALLMARK_KRAS_SIGNALING_DN	Kras Signaling Dn	67	0.3554	1.2697	0.132723	0.159348	0.989	4129	tags=36%, list=28%, signal=50%
Reactome	REACTOME_TRANSFERRIN_ENDOCYTOSIS_AND_RECYCLING	Transferrin Endocytosis And Recycling	25	0.4161	1.2687	0.160265	0.254757	1	5061	tags=56%, list=34%, signal=85%
Reactome	REACTOME_RSV_HOST_INTERACTIONS	Rsv Host Interactions	74	0.3446	1.2686	0.129545	0.254356	1	4292	tags=42%, list=29%, signal=59%
WikiPathways	WP_HEAD_AND_NECK_SQUAMOUS_CELL_CARCINOMA	Head And Neck Squamous Cell Carcinoma	64	0.3546	1.2676	0.137647	0.340125	1	2772	tags=30%, list=19%, signal=36%
Reactome	REACTOME_NEUROTRANSMITTER_RECEPTORS_AND_POSTSYNAPTIC_SIGNAL_TRANSMISSION	Neurotransmitter Receptors And Postsynaptic Signal Transmission	114	0.328	1.2672	0.102592	0.25596	1	2962	tags=31%, list=20%, signal=38%
WikiPathways	WP_FBXL10_ENHANCEMENT_OF_MAPERK_SIGNALING_IN_DIFFUSE_LARGE_BCELL_LYMPHOMA	Fbxl10 Enhancement Of Maperk Signaling In Diffuse Large Bcell Lymphoma	27	0.4129	1.2671	0.149077	0.339641	1	4661	tags=52%, list=32%, signal=76%
Reactome	REACTOME_ANTIMICROBIAL_MECHANISM_OF_IFN_STIMULATED_GENES	Antimicrobial Mechanism Of Ifn Stimulated Genes	141	0.3233	1.2671	0.0730159	0.255587	1	3510	tags=27%, list=24%, signal=35%
Reactome	REACTOME_INTERLEUKIN_17_SIGNALING	Interleukin 17 Signaling	62	0.3538	1.2667	0.13658	0.255483	1	3127	tags=29%, list=21%, signal=37%
WikiPathways	WP_INFLUENCE_OF_LAMINOPATHIES_ON_WNT_SIGNALING	Influence Of Laminopathies On Wnt Signaling	27	0.4098	1.2659	0.157419	0.340093	1	2650	tags=30%, list=18%, signal=36%
Reactome	REACTOME_PEROXISOMAL_PROTEIN_IMPORT	Peroxisomal Protein Import	52	0.3677	1.2656	0.137395	0.256588	1	3127	tags=25%, list=21%, signal=32%
WikiPathways	WP_HEMATOPOIETIC_STEM_CELL_DIFFERENTIATION	Hematopoietic Stem Cell Differentiation	25	0.4175	1.2634	0.17477	0.343357	1	2772	tags=36%, list=19%, signal=44%
Reactome	REACTOME_SARS_COV_2_INFECTION	Sars Cov 2 Infection	244	0.3062	1.2623	0.0539715	0.261322	1	3775	tags=30%, list=26%, signal=40%
Reactome	REACTOME_DEVELOPMENTAL_LINEAGE_OF_PANCREATIC_DUCTAL_CELLS	Developmental Lineage Of Pancreatic Ductal Cells	23	0.4221	1.2608	0.162269	0.263018	1	2143	tags=35%, list=15%, signal=41%
WikiPathways	WP_NAD_BIOSYNTHETIC_PATHWAYS	Nad Biosynthetic Pathways	17	0.4572	1.2594	0.191341	0.349439	1	1617	tags=24%, list=11%, signal=26%
Reactome	REACTOME_RAS_PROCESSING	Ras Processing	20	0.4343	1.2592	0.173104	0.264999	1	3766	tags=35%, list=26%, signal=47%
Reactome	REACTOME_TRANSLOCATION_OF_SLC2A4_GLUT4_TO_THE_PLASMA_MEMBRANE	Translocation Of Slc2A4 Glut4 To The Plasma Membrane	59	0.355	1.2587	0.143535	0.265164	1	1770	tags=22%, list=12%, signal=25%
WikiPathways	WP_CANCER_PATHWAYS	Cancer Pathways	346	0.3015	1.2586	0.0301811	0.349112	1	2449	tags=24%, list=17%, signal=28%
WikiPathways	WP_MAPK_SIGNALING_AND_ARTD_FAMILY_MEMBERS	Mapk Signaling And Artd Family Members	31	0.3923	1.2586	0.176179	0.347473	1	2930	tags=32%, list=20%, signal=40%
WikiPathways	WP_WARBURG_EFFECT_MODULATED_BY_DEUBIQUITINATING_ENZYMES_AND_THEIR_SUBSTRATES	Warburg Effect Modulated By Deubiquitinating Enzymes And Their Substrates	23	0.4214	1.2585	0.171691	0.345872	1	1145	tags=22%, list=8%, signal=24%
Reactome	REACTOME_MAPK_FAMILY_SIGNALING_CASCADES	Mapk Family Signaling Cascades	229	0.3089	1.2584	0.0651068	0.265082	1	3667	tags=34%, list=25%, signal=44%
Reactome	REACTOME_DEFECTIVE_INTRINSIC_PATHWAY_FOR_APOPTOSIS	Defective Intrinsic Pathway For Apoptosis	22	0.4302	1.258	0.180371	0.265065	1	1701	tags=27%, list=12%, signal=31%
Reactome	REACTOME_GOLGI_TO_ER_RETROGRADE_TRANSPORT	Golgi To Er Retrograde Transport	113	0.3276	1.2571	0.106406	0.26595	1	2950	tags=27%, list=20%, signal=34%
WikiPathways	WP_SPINAL_CORD_INJURY	Spinal Cord Injury	76	0.3404	1.257	0.122706	0.34705	1	3668	tags=37%, list=25%, signal=49%
WikiPathways	WP_FACT_COMPLEX_AND_DNA_DOUBLESTRAND_BREAK_REPAIR	Fact Complex And Dna Doublestrand Break Repair	26	0.4091	1.2555	0.172057	0.348437	1	3432	tags=38%, list=23%, signal=50%
WikiPathways	WP_NEURAL_CREST_CELL_MIGRATION_DURING_DEVELOPMENT	Neural Crest Cell Migration During Development	30	0.3991	1.2544	0.160691	0.348654	1	2797	tags=40%, list=19%, signal=49%
Reactome	REACTOME_TELOMERE_C_STRAND_LAGGING_STRAND_SYNTHESIS	Telomere C Strand Lagging Strand Synthesis	32	0.3914	1.2542	0.175416	0.269794	1	5908	tags=56%, list=40%, signal=94%
Reactome	REACTOME_TBC_RABGAPS	Tbc Rabgaps	40	0.3762	1.2519	0.156328	0.273017	1	4988	tags=45%, list=34%, signal=68%
Reactome	REACTOME_TRANSLESION_SYNTHESIS_BY_POLH	Translesion Synthesis By Polh	19	0.4446	1.2518	0.188366	0.272557	1	4683	tags=47%, list=32%, signal=69%
Reactome	REACTOME_FACTORS_INVOLVED_IN_MEGAKARYOCYTE_DEVELOPMENT_AND_PLATELET_PRODUCTION	Factors Involved In Megakaryocyte Development And Platelet Production	122	0.3277	1.2517	0.0952381	0.272119	1	2924	tags=30%, list=20%, signal=38%
Reactome	REACTOME_CLASS_I_PEROXISOMAL_MEMBRANE_PROTEIN_IMPORT	Class I Peroxisomal Membrane Protein Import	19	0.4407	1.2502	0.156124	0.27386	1	4992	tags=42%, list=34%, signal=64%
WikiPathways	WP_MAPK_CASCADE	Mapk Cascade	32	0.3879	1.2494	0.181467	0.356732	1	3120	tags=34%, list=21%, signal=43%
Reactome	REACTOME_TICAM1_RIP1_MEDIATED_IKK_COMPLEX_RECRUITMENT	Ticam1 Rip1 Mediated Ikk Complex Recruitment	17	0.4595	1.2489	0.180939	0.27557	1	3127	tags=29%, list=21%, signal=37%
Reactome	REACTOME_METABOLISM_OF_STEROID_HORMONES	Metabolism Of Steroid Hormones	15	0.4701	1.2467	0.196906	0.278598	1	2227	tags=47%, list=15%, signal=55%
Reactome	REACTOME_CHAPERONE_MEDIATED_AUTOPHAGY	Chaperone Mediated Autophagy	17	0.4518	1.2458	0.201705	0.279388	1	3127	tags=29%, list=21%, signal=37%
Reactome	REACTOME_SENSORY_PERCEPTION	Sensory Perception	102	0.3312	1.2456	0.109189	0.279274	1	3644	tags=30%, list=25%, signal=40%
Reactome	REACTOME_ATTACHMENT_OF_BACTERIA_TO_EPITHELIAL_CELLS	Attachment Of Bacteria To Epithelial Cells	15	0.468	1.2446	0.193503	0.28042	1	2843	tags=40%, list=19%, signal=49%
WikiPathways	WP_PDGF_PATHWAY	Pdgf Pathway	36	0.3809	1.2444	0.163955	0.364868	1	1333	tags=22%, list=9%, signal=24%
Reactome	REACTOME_DNA_STRAND_ELONGATION	Dna Strand Elongation	32	0.3907	1.2431	0.196496	0.282277	1	5908	tags=59%, list=40%, signal=99%
WikiPathways	WP_NUCLEOTIDE_EXCISION_REPAIR	Nucleotide Excision Repair	41	0.3772	1.2419	0.174817	0.368102	1	5908	tags=54%, list=40%, signal=89%
Reactome	REACTOME_MATURATION_OF_SARS_COV_2_SPIKE_PROTEIN	Maturation Of Sars Cov 2 Spike Protein	41	0.3703	1.2417	0.178484	0.283741	1	3721	tags=41%, list=25%, signal=55%
Reactome	REACTOME_JNK_C_JUN_KINASES_PHOSPHORYLATION_AND_ACTIVATION_MEDIATED_BY_ACTIVATED_HUMAN_TAK1	Jnk C Jun Kinases Phosphorylation And Activation Mediated By Activated Human Tak1	20	0.4249	1.2413	0.191489	0.283773	1	3757	tags=40%, list=25%, signal=54%
Reactome	REACTOME_CARGO_RECOGNITION_FOR_CLATHRIN_MEDIATED_ENDOCYTOSIS	Cargo Recognition For Clathrin Mediated Endocytosis	78	0.3376	1.2407	0.144318	0.284243	1	3230	tags=31%, list=22%, signal=39%
Reactome	REACTOME_FGFR2_MUTANT_RECEPTOR_ACTIVATION	Fgfr2 Mutant Receptor Activation	20	0.4354	1.2404	0.194444	0.284034	1	2799	tags=45%, list=19%, signal=55%
Reactome	REACTOME_RNA_POLYMERASE_III_TRANSCRIPTION_INITIATION_FROM_TYPE_1_PROMOTER	Rna Polymerase Iii Transcription Initiation From Type 1 Promoter	27	0.4013	1.2403	0.171278	0.283663	1	5589	tags=56%, list=38%, signal=89%
WikiPathways	WP_WNTBETACATENIN_SIGNALING_AND_ARTD_FAMILY_MEMBERS	Wntbetacatenin Signaling And Artd Family Members	15	0.4638	1.2399	0.184862	0.370182	1	2444	tags=40%, list=17%, signal=48%
Reactome	REACTOME_RHO_GTPASES_ACTIVATE_IQGAPS	Rho Gtpases Activate Iqgaps	23	0.4225	1.239	0.204724	0.285206	1	1205	tags=26%, list=8%, signal=28%
Reactome	REACTOME_SIGNALING_BY_RECEPTOR_TYROSINE_KINASES	Signaling By Receptor Tyrosine Kinases	400	0.2936	1.2381	0.0372233	0.285948	1	3134	tags=29%, list=21%, signal=36%
Hallmarks	HALLMARK_ESTROGEN_RESPONSE_LATE	Estrogen Response Late	133	0.3188	1.2378	0.110521	0.196015	0.998	2650	tags=26%, list=18%, signal=31%
WikiPathways	WP_FATTY_ACID_BETAOXIDATION	Fatty Acid Betaoxidation	27	0.4086	1.2377	0.181347	0.373008	1	4563	tags=44%, list=31%, signal=64%
Reactome	REACTOME_POLYMERASE_SWITCHING_ON_THE_C_STRAND_OF_THE_TELOMERE	Polymerase Switching On The C Strand Of The Telomere	24	0.4136	1.2372	0.197903	0.286851	1	5908	tags=58%, list=40%, signal=97%
WikiPathways	WP_2Q13_COPY_NUMBER_VARIATION_SYNDROME	2Q13 Copy Number Variation Syndrome	40	0.3755	1.237	0.166047	0.372448	1	2817	tags=33%, list=19%, signal=40%
Reactome	REACTOME_CLASS_I_MHC_MEDIATED_ANTIGEN_PROCESSING_PRESENTATION	Class I Mhc Mediated Antigen Processing Presentation	317	0.3	1.2367	0.0515672	0.287011	1	3127	tags=26%, list=21%, signal=33%
Hallmarks	HALLMARK_IL2_STAT5_SIGNALING	Il2 Stat5 Signaling	146	0.3125	1.2346	0.108995	0.193006	0.999	3227	tags=27%, list=22%, signal=34%
Reactome	REACTOME_ANTIGEN_PROCESSING_UBIQUITINATION_PROTEASOME_DEGRADATION	Antigen Processing Ubiquitination Proteasome Degradation	263	0.3045	1.2336	0.0560081	0.29173	1	3311	tags=28%, list=22%, signal=36%
WikiPathways	WP_PROXIMAL_TUBULE_TRANSPORT	Proximal Tubule Transport	32	0.3791	1.2331	0.179067	0.378311	1	3361	tags=38%, list=23%, signal=48%
WikiPathways	WP_PPARALPHA_PATHWAY	Pparalpha Pathway	16	0.4548	1.2318	0.194326	0.379305	1	4245	tags=50%, list=29%, signal=70%
Reactome	REACTOME_SARS_COV_2_HOST_INTERACTIONS	Sars Cov 2 Host Interactions	155	0.3089	1.2316	0.107327	0.29433	1	4637	tags=35%, list=31%, signal=51%
WikiPathways	WP_VITAMIN_DSENSITIVE_CALCIUM_SIGNALING_IN_DEPRESSION	Vitamin Dsensitive Calcium Signaling In Depression	23	0.4151	1.231	0.194293	0.379025	1	1911	tags=30%, list=13%, signal=35%
Reactome	REACTOME_BETA_CATENIN_INDEPENDENT_WNT_SIGNALING	Beta Catenin Independent Wnt Signaling	108	0.3212	1.2298	0.12782	0.296627	1	4144	tags=40%, list=28%, signal=55%
Reactome	REACTOME_GOLGI_ASSOCIATED_VESICLE_BIOGENESIS	Golgi Associated Vesicle Biogenesis	54	0.3518	1.2282	0.15	0.298838	1	2700	tags=28%, list=18%, signal=34%
Reactome	REACTOME_ATTENUATION_PHASE	Attenuation Phase	21	0.4314	1.2279	0.200798	0.298615	1	4983	tags=48%, list=34%, signal=72%
WikiPathways	WP_TP53_NETWORK	Tp53 Network	16	0.4466	1.2262	0.205092	0.387398	1	1507	tags=31%, list=10%, signal=35%
Reactome	REACTOME_DUAL_INCISION_IN_GG_NER	Dual Incision In Gg Ner	40	0.3665	1.2257	0.191067	0.301785	1	5908	tags=55%, list=40%, signal=91%
WikiPathways	WP_IL4_SIGNALING	Il4 Signaling	45	0.3623	1.2255	0.18642	0.386923	1	2410	tags=27%, list=16%, signal=32%
WikiPathways	WP_IL6_SIGNALING	Il6 Signaling	38	0.374	1.2253	0.208178	0.385518	1	1750	tags=26%, list=12%, signal=30%
Reactome	REACTOME_RESPONSE_OF_MTB_TO_PHAGOCYTOSIS	Response Of Mtb To Phagocytosis	19	0.4361	1.2237	0.205056	0.304421	1	4323	tags=47%, list=29%, signal=67%
WikiPathways	WP_AMYOTROPHIC_LATERAL_SCLEROSIS_ALS	Amyotrophic Lateral Sclerosis Als	28	0.3939	1.2234	0.206391	0.387766	1	3228	tags=39%, list=22%, signal=50%
Reactome	REACTOME_NUCLEAR_RECEPTOR_TRANSCRIPTION_PATHWAY	Nuclear Receptor Transcription Pathway	38	0.3723	1.2231	0.185	0.304805	1	3421	tags=34%, list=23%, signal=44%
WikiPathways	WP_EMBRYONIC_STEM_CELL_PLURIPOTENCY_PATHWAYS	Embryonic Stem Cell Pluripotency Pathways	75	0.3302	1.2227	0.132251	0.38734	1	2449	tags=28%, list=17%, signal=33%
WikiPathways	WP_FRAGILE_X_SYNDROME	Fragile X Syndrome	93	0.3281	1.2219	0.142237	0.387047	1	2534	tags=29%, list=17%, signal=35%
Reactome	REACTOME_KSRP_KHSRP_BINDS_AND_DESTABILIZES_MRNA	Ksrp Khsrp Binds And Destabilizes Mrna	16	0.4569	1.2199	0.213889	0.309664	1	2669	tags=25%, list=18%, signal=30%
Reactome	REACTOME_MITOCHONDRIAL_FATTY_ACID_BETA_OXIDATION	Mitochondrial Fatty Acid Beta Oxidation	32	0.3835	1.2195	0.188986	0.309674	1	4088	tags=34%, list=28%, signal=47%
WikiPathways	WP_NOTCH_SIGNALING_WP268	Notch Signaling Wp268	34	0.3742	1.2184	0.202842	0.392299	1	4178	tags=47%, list=28%, signal=65%
Reactome	REACTOME_MTOR_SIGNALLING	Mtor Signalling	39	0.3671	1.2184	0.191624	0.311069	1	2625	tags=26%, list=18%, signal=31%
WikiPathways	WP_TCELL_ACTIVATION_SARSCOV2	Tcell Activation Sarscov2	56	0.3459	1.218	0.177515	0.391302	1	1957	tags=25%, list=13%, signal=29%
Reactome	REACTOME_TRANSLATION_OF_SARS_COV_2_STRUCTURAL_PROTEINS	Translation Of Sars Cov 2 Structural Proteins	61	0.3437	1.2159	0.17891	0.314688	1	3721	tags=38%, list=25%, signal=50%
WikiPathways	WP_HEREDITARY_LEIOMYOMATOSIS_AND_RENAL_CELL_CARCINOMA_PATHWAY	Hereditary Leiomyomatosis And Renal Cell Carcinoma Pathway	19	0.4314	1.2158	0.199726	0.394225	1	1145	tags=16%, list=8%, signal=17%
WikiPathways	WP_MACROPHAGESTIMULATING_PROTEIN_MSP_SIGNALING	Macrophagestimulating Protein Msp Signaling	88	0.3269	1.215	0.16147	0.394145	1	1343	tags=18%, list=9%, signal=20%
WikiPathways	WP_PARKINSONS_DISEASE_PATHWAY	Parkinsons Disease Pathway	30	0.3923	1.215	0.19509	0.392424	1	3228	tags=33%, list=22%, signal=43%
WikiPathways	WP_COMPLEMENT_SYSTEM	Complement System	39	0.3639	1.2127	0.189356	0.39553	1	1757	tags=26%, list=12%, signal=29%
Reactome	REACTOME_GLOBAL_GENOME_NUCLEOTIDE_EXCISION_REPAIR_GG_NER	Global Genome Nucleotide Excision Repair Gg Ner	80	0.3296	1.2114	0.157835	0.322062	1	5908	tags=50%, list=40%, signal=83%
Reactome	REACTOME_LAGGING_STRAND_SYNTHESIS	Lagging Strand Synthesis	20	0.4255	1.2111	0.231275	0.321916	1	5908	tags=65%, list=40%, signal=108%
Reactome	REACTOME_DEVELOPMENTAL_CELL_LINEAGES	Developmental Cell Lineages	57	0.345	1.2098	0.197867	0.323567	1	2143	tags=26%, list=15%, signal=31%
Reactome	REACTOME_TRANSPORT_OF_SMALL_MOLECULES	Transport Of Small Molecules	431	0.2903	1.2094	0.041	0.323586	1	3937	tags=34%, list=27%, signal=45%
Reactome	REACTOME_RESPIRATORY_SYNCYTIAL_VIRUS_RSV_ATTACHMENT_AND_ENTRY	Respiratory Syncytial Virus Rsv Attachment And Entry	18	0.4412	1.2077	0.221154	0.326109	1	3515	tags=44%, list=24%, signal=58%
WikiPathways	WP_ALPHA_6_BETA_4_SIGNALING	Alpha 6 Beta 4 Signaling	30	0.3862	1.2075	0.213642	0.404849	1	2132	tags=27%, list=14%, signal=31%
WikiPathways	WP_ENDOMETRIAL_CANCER	Endometrial Cancer	54	0.3447	1.2068	0.211449	0.404455	1	2650	tags=33%, list=18%, signal=40%
WikiPathways	WP_ALLOGRAFT_REJECTION	Allograft Rejection	31	0.3812	1.2054	0.221354	0.405459	1	3228	tags=35%, list=22%, signal=45%
Reactome	REACTOME_ELASTIC_FIBRE_FORMATION	Elastic Fibre Formation	30	0.3809	1.2032	0.203026	0.333548	1	1061	tags=27%, list=7%, signal=29%
Reactome	REACTOME_MITOCHONDRIAL_UNFOLDED_PROTEIN_RESPONSE_UPRMT	Mitochondrial Unfolded Protein Response Uprmt	16	0.4524	1.2021	0.250352	0.334909	1	1922	tags=31%, list=13%, signal=36%
Reactome	REACTOME_SULFUR_AMINO_ACID_METABOLISM	Sulfur Amino Acid Metabolism	20	0.4138	1.2004	0.236986	0.337313	1	4795	tags=50%, list=32%, signal=74%
WikiPathways	WP_ANGIOPOIETINLIKE_PROTEIN_8_REGULATORY_PATHWAY	Angiopoietinlike Protein 8 Regulatory Pathway	110	0.3127	1.2004	0.161045	0.414137	1	3256	tags=34%, list=22%, signal=43%
WikiPathways	WP_PLURIPOTENT_STEM_CELL_DIFFERENTIATION_PATHWAY	Pluripotent Stem Cell Differentiation Pathway	21	0.4143	1.1995	0.224324	0.414287	1	1145	tags=24%, list=8%, signal=26%
WikiPathways	WP_METABOLIC_REPROGRAMMING_IN_PANCREATIC_CANCER	Metabolic Reprogramming In Pancreatic Cancer	39	0.3674	1.1984	0.219725	0.41459	1	1211	tags=18%, list=8%, signal=20%
WikiPathways	WP_VITAMIN_A_AND_CAROTENOID_METABOLISM	Vitamin A And Carotenoid Metabolism	24	0.4045	1.1979	0.235602	0.413792	1	1796	tags=29%, list=12%, signal=33%
WikiPathways	WP_FOCAL_ADHESION_PI3KAKTMTORSIGNALING	Focal Adhesion Pi3Kaktmtorsignaling	208	0.2965	1.1977	0.10998	0.412383	1	3413	tags=31%, list=23%, signal=39%
Reactome	REACTOME_GENE_AND_PROTEIN_EXPRESSION_BY_JAK_STAT_SIGNALING_AFTER_INTERLEUKIN_12_STIMULATION	Gene And Protein Expression By Jak Stat Signaling After Interleukin 12 Stimulation	32	0.3805	1.1961	0.206536	0.344414	1	3710	tags=38%, list=25%, signal=50%
WikiPathways	WP_PANCREATIC_ADENOCARCINOMA_PATHWAY	Pancreatic Adenocarcinoma Pathway	83	0.3217	1.196	0.17758	0.414369	1	3228	tags=31%, list=22%, signal=40%
WikiPathways	WP_8P231_COPY_NUMBER_VARIATION_SYNDROME	8P231 Copy Number Variation Syndrome	33	0.3712	1.1957	0.233586	0.413116	1	2808	tags=24%, list=19%, signal=30%
Reactome	REACTOME_EPH_EPHRIN_SIGNALING	Eph Ephrin Signaling	79	0.3233	1.1956	0.177901	0.344629	1	4308	tags=44%, list=29%, signal=62%
Reactome	REACTOME_NCAM1_INTERACTIONS	Ncam1 Interactions	23	0.4022	1.1938	0.237265	0.347275	1	2931	tags=43%, list=20%, signal=54%
Reactome	REACTOME_TRANSMISSION_ACROSS_CHEMICAL_SYNAPSES	Transmission Across Chemical Synapses	145	0.3017	1.1926	0.155556	0.349113	1	2833	tags=28%, list=19%, signal=35%
Reactome	REACTOME_RAF_INDEPENDENT_MAPK1_3_ACTIVATION	Raf Independent Mapk1 3 Activation	21	0.4055	1.192	0.238095	0.349356	1	1327	tags=24%, list=9%, signal=26%
Reactome	REACTOME_G_ALPHA_Z_SIGNALLING_EVENTS	G Alpha Z Signalling Events	32	0.3749	1.1915	0.22625	0.349694	1	2830	tags=31%, list=19%, signal=39%
Reactome	REACTOME_NOTCH3_ACTIVATION_AND_TRANSMISSION_OF_SIGNAL_TO_THE_NUCLEUS	Notch3 Activation And Transmission Of Signal To The Nucleus	19	0.4245	1.1915	0.242838	0.349003	1	3419	tags=53%, list=23%, signal=68%
Reactome	REACTOME_CYTOPROTECTION_BY_HMOX1	Cytoprotection By Hmox1	41	0.3593	1.1906	0.216607	0.349989	1	4350	tags=41%, list=29%, signal=59%
Reactome	REACTOME_NEURONAL_SYSTEM	Neuronal System	195	0.2937	1.1895	0.132444	0.351159	1	2833	tags=29%, list=19%, signal=35%
WikiPathways	WP_POLYCYSTIC_KIDNEY_DISEASE_PATHWAY	Polycystic Kidney Disease Pathway	54	0.3426	1.1894	0.206897	0.424555	1	2830	tags=30%, list=19%, signal=37%
WikiPathways	WP_ZINC_HOMEOSTASIS	Zinc Homeostasis	18	0.4214	1.1885	0.240766	0.424438	1	3498	tags=33%, list=24%, signal=44%
WikiPathways	WP_ADIPOGENESIS	Adipogenesis	93	0.3153	1.1884	0.173391	0.422862	1	3607	tags=31%, list=24%, signal=41%
WikiPathways	WP_BDNF_SIGNALING_IN_NEURODEVELOPMENT	Bdnf Signaling In Neurodevelopment	109	0.3075	1.1882	0.191192	0.421424	1	3228	tags=29%, list=22%, signal=37%
Reactome	REACTOME_MTORC1_MEDIATED_SIGNALLING	Mtorc1 Mediated Signalling	24	0.3975	1.1881	0.233957	0.353063	1	2625	tags=29%, list=18%, signal=35%
Reactome	REACTOME_FORMATION_OF_SENESCENCE_ASSOCIATED_HETEROCHROMATIN_FOCI_SAHF	Formation Of Senescence Associated Heterochromatin Foci Sahf	17	0.4321	1.1881	0.243537	0.352417	1	1507	tags=29%, list=10%, signal=33%
Reactome	REACTOME_CELL_DEATH_SIGNALLING_VIA_NRAGE_NRIF_AND_NADE	Cell Death Signalling Via Nrage Nrif And Nade	59	0.3331	1.1877	0.191716	0.352472	1	4189	tags=41%, list=28%, signal=57%
Reactome	REACTOME_GLYCOSPHINGOLIPID_CATABOLISM	Glycosphingolipid Catabolism	28	0.3795	1.1877	0.220915	0.351813	1	3750	tags=36%, list=25%, signal=48%
WikiPathways	WP_NONSMALL_CELL_LUNG_CANCER	Nonsmall Cell Lung Cancer	63	0.3321	1.1864	0.189437	0.42318	1	3228	tags=33%, list=22%, signal=42%
Reactome	REACTOME_OTHER_INTERLEUKIN_SIGNALING	Other Interleukin Signaling	15	0.443	1.1852	0.249271	0.355697	1	3157	tags=53%, list=21%, signal=68%
Reactome	REACTOME_INTERLEUKIN_12_SIGNALING	Interleukin 12 Signaling	37	0.3581	1.1837	0.228288	0.357902	1	3710	tags=38%, list=25%, signal=50%
Reactome	REACTOME_SEMAPHORIN_INTERACTIONS	Semaphorin Interactions	52	0.3414	1.1836	0.215896	0.357473	1	3108	tags=35%, list=21%, signal=44%
Reactome	REACTOME_RAB_REGULATION_OF_TRAFFICKING	Rab Regulation Of Trafficking	109	0.3139	1.1831	0.189369	0.357636	1	4758	tags=39%, list=32%, signal=58%
Reactome	REACTOME_RHO_GTPASES_ACTIVATE_PAKS	Rho Gtpases Activate Paks	19	0.41	1.182	0.254305	0.358844	1	2841	tags=37%, list=19%, signal=46%
Hallmarks	HALLMARK_KRAS_SIGNALING_UP	Kras Signaling Up	122	0.3036	1.1814	0.176972	0.274796	1	3256	tags=27%, list=22%, signal=34%
Reactome	REACTOME_DEFECTIVE_B4GALT7_CAUSES_EDS_PROGEROID_TYPE	Defective B4Galt7 Causes Eds Progeroid Type	15	0.4419	1.1812	0.265912	0.359675	1	3515	tags=47%, list=24%, signal=61%
Reactome	REACTOME_HEPARAN_SULFATE_HEPARIN_HS_GAG_METABOLISM	Heparan Sulfate Heparin Hs Gag Metabolism	28	0.3811	1.1789	0.244415	0.363384	1	3808	tags=39%, list=26%, signal=53%
Reactome	REACTOME_P75_NTR_RECEPTOR_MEDIATED_SIGNALLING	P75 Ntr Receptor Mediated Signalling	79	0.3183	1.1784	0.192922	0.363508	1	3441	tags=32%, list=23%, signal=41%
Reactome	REACTOME_SLC_MEDIATED_TRANSPORT_OF_AMINO_ACIDS	Slc Mediated Transport Of Amino Acids	21	0.4043	1.1783	0.242424	0.363038	1	1608	tags=29%, list=11%, signal=32%
Reactome	REACTOME_NGF_STIMULATED_TRANSCRIPTION	Ngf Stimulated Transcription	31	0.3733	1.178	0.252591	0.362765	1	3219	tags=35%, list=22%, signal=45%
WikiPathways	WP_THERMOGENESIS	Thermogenesis	78	0.321	1.1772	0.209534	0.441145	1	2343	tags=23%, list=16%, signal=27%
Reactome	REACTOME_MATURATION_OF_TCA_ENZYMES_AND_REGULATION_OF_TCA_CYCLE	Maturation Of Tca Enzymes And Regulation Of Tca Cycle	20	0.415	1.1765	0.258808	0.364897	1	5717	tags=60%, list=39%, signal=98%
WikiPathways	WP_MIRNA_REGULATION_OF_P53_PATHWAY_IN_PROSTATE_CANCER	Mirna Regulation Of P53 Pathway In Prostate Cancer	21	0.4072	1.1759	0.248963	0.441885	1	1255	tags=24%, list=9%, signal=26%
Reactome	REACTOME_EXTRA_NUCLEAR_ESTROGEN_SIGNALING	Extra Nuclear Estrogen Signaling	57	0.3381	1.1756	0.233454	0.365832	1	1333	tags=21%, list=9%, signal=23%
Reactome	REACTOME_LEISHMANIA_INFECTION	Leishmania Infection	119	0.3048	1.1751	0.203842	0.366192	1	2444	tags=23%, list=17%, signal=27%
Hallmarks	HALLMARK_INTERFERON_GAMMA_RESPONSE	Interferon Gamma Response	136	0.3001	1.1742	0.183738	0.277434	1	4395	tags=38%, list=30%, signal=53%
WikiPathways	WP_NUCLEAR_RECEPTORS	Nuclear Receptors	28	0.3808	1.1738	0.244216	0.444714	1	3421	tags=39%, list=23%, signal=51%
WikiPathways	WP_VITAMIN_B12_METABOLISM	Vitamin B12 Metabolism	28	0.3825	1.1727	0.240157	0.445141	1	4561	tags=50%, list=31%, signal=72%
Reactome	REACTOME_SENSORY_PROCESSING_OF_SOUND	Sensory Processing Of Sound	39	0.3508	1.1709	0.244114	0.3734	1	3399	tags=33%, list=23%, signal=43%
WikiPathways	WP_MITOCHONDRIAL_LONG_CHAIN_FATTY_ACID_BETAOXIDATION	Mitochondrial Long Chain Fatty Acid Betaoxidation	16	0.4292	1.1689	0.283046	0.451028	1	858	tags=19%, list=6%, signal=20%
Reactome	REACTOME_CELLULAR_RESPONSES_TO_MECHANICAL_STIMULI	Cellular Responses To Mechanical Stimuli	78	0.3151	1.1684	0.212222	0.377364	1	3684	tags=36%, list=25%, signal=48%
Hallmarks	HALLMARK_FATTY_ACID_METABOLISM	Fatty Acid Metabolism	128	0.3005	1.1678	0.205319	0.2796	1	4245	tags=33%, list=29%, signal=46%
Hallmarks	HALLMARK_APICAL_SURFACE	Apical Surface	27	0.3789	1.1643	0.269677	0.276653	1	1786	tags=26%, list=12%, signal=29%
WikiPathways	WP_VASOPRESSINREGULATED_WATER_REABSORPTION	Vasopressinregulated Water Reabsorption	35	0.3562	1.1637	0.271053	0.460369	1	2879	tags=29%, list=20%, signal=35%
Reactome	REACTOME_MET_PROMOTES_CELL_MOTILITY	Met Promotes Cell Motility	32	0.3665	1.163	0.252888	0.386873	1	2433	tags=28%, list=16%, signal=34%
Reactome	REACTOME_FC_EPSILON_RECEPTOR_FCERI_SIGNALING	Fc Epsilon Receptor Fceri Signaling	107	0.3055	1.1621	0.205689	0.387934	1	4882	tags=45%, list=33%, signal=67%
Reactome	REACTOME_FORMATION_OF_NEURONAL_PROGENITOR_AND_NEURONAL_BAF_NPBAF_AND_NBAF	Formation Of Neuronal Progenitor And Neuronal Baf Npbaf And Nbaf	20	0.4056	1.1615	0.271523	0.388228	1	2125	tags=25%, list=14%, signal=29%
WikiPathways	WP_AXON_GUIDANCE	Axon Guidance	51	0.3392	1.1608	0.249398	0.464814	1	3342	tags=31%, list=23%, signal=40%
Reactome	REACTOME_KINESINS	Kinesins	42	0.3501	1.1603	0.24813	0.389859	1	1632	tags=26%, list=11%, signal=29%
Reactome	REACTOME_ATF4_ACTIVATES_GENES_IN_RESPONSE_TO_ENDOPLASMIC_RETICULUM_STRESS	Atf4 Activates Genes In Response To Endoplasmic Reticulum Stress	25	0.3826	1.1601	0.249333	0.389426	1	3005	tags=28%, list=20%, signal=35%
WikiPathways	WP_EXTRAFOLLICULAR_AND_FOLLICULAR_B_CELL_ACTIVATION_BY_SARSCOV2	Extrafollicular And Follicular B Cell Activation By Sarscov2	30	0.3644	1.1584	0.255155	0.468468	1	1257	tags=20%, list=9%, signal=22%
Reactome	REACTOME_CELL_CYCLE_CHECKPOINTS	Cell Cycle Checkpoints	267	0.2817	1.1571	0.142566	0.394535	1	4167	tags=34%, list=28%, signal=46%
Reactome	REACTOME_O_LINKED_GLYCOSYLATION	O Linked Glycosylation	67	0.3232	1.1567	0.229095	0.394601	1	2935	tags=33%, list=20%, signal=41%
Reactome	REACTOME_INTEGRIN_CELL_SURFACE_INTERACTIONS	Integrin Cell Surface Interactions	52	0.3334	1.1565	0.234597	0.394253	1	3668	tags=42%, list=25%, signal=56%
Reactome	REACTOME_MAP2K_AND_MAPK_ACTIVATION	Map2K And Mapk Activation	32	0.3669	1.1562	0.246592	0.393988	1	4465	tags=44%, list=30%, signal=63%
Reactome	REACTOME_LATE_SARS_COV_2_INFECTION_EVENTS	Late Sars Cov 2 Infection Events	68	0.3225	1.1541	0.23322	0.397482	1	3721	tags=35%, list=25%, signal=47%
Reactome	REACTOME_SIGNALING_BY_ERBB2	Signaling By Erbb2	41	0.3439	1.1534	0.252132	0.397979	1	3127	tags=32%, list=21%, signal=40%
Reactome	REACTOME_VIRAL_MESSENGER_RNA_SYNTHESIS	Viral Messenger Rna Synthesis	44	0.3421	1.1532	0.277709	0.397668	1	2799	tags=25%, list=19%, signal=31%
WikiPathways	WP_TCELL_RECEPTOR_SIGNALING	Tcell Receptor Signaling	66	0.3184	1.1521	0.249716	0.48074	1	1333	tags=17%, list=9%, signal=18%
Reactome	REACTOME_ANTI_INFLAMMATORY_RESPONSE_FAVOURING_LEISHMANIA_PARASITE_INFECTION	Anti Inflammatory Response Favouring Leishmania Parasite Infection	51	0.3349	1.1518	0.267231	0.399585	1	2122	tags=24%, list=14%, signal=27%
WikiPathways	WP_GPCRS_OTHER	Gpcrs Other	22	0.3886	1.1518	0.271233	0.47934	1	2229	tags=27%, list=15%, signal=32%
Hallmarks	HALLMARK_UNFOLDED_PROTEIN_RESPONSE	Unfolded Protein Response	109	0.2975	1.1503	0.216685	0.291806	1	3168	tags=27%, list=21%, signal=34%
Reactome	REACTOME_CILIUM_ASSEMBLY	Cilium Assembly	172	0.2883	1.1483	0.197906	0.405809	1	4035	tags=31%, list=27%, signal=42%
Reactome	REACTOME_GLYCOSPHINGOLIPID_METABOLISM	Glycosphingolipid Metabolism	41	0.3426	1.1475	0.260606	0.40644	1	3750	tags=39%, list=25%, signal=52%
WikiPathways	WP_TARGET_OF_RAPAMYCIN_SIGNALING	Target Of Rapamycin Signaling	34	0.3575	1.1472	0.265645	0.487812	1	2529	tags=29%, list=17%, signal=35%
Reactome	REACTOME_EGFR_DOWNREGULATION	Egfr Downregulation	23	0.3838	1.1471	0.284553	0.406567	1	3127	tags=30%, list=21%, signal=39%
Reactome	REACTOME_EPIGENETIC_REGULATION_OF_GENE_EXPRESSION	Epigenetic Regulation Of Gene Expression	281	0.2784	1.146	0.148485	0.407956	1	4249	tags=35%, list=29%, signal=48%
Reactome	REACTOME_SARS_COV_INFECTIONS	Sars Cov Infections	335	0.2765	1.1458	0.138973	0.407456	1	3775	tags=28%, list=26%, signal=37%
WikiPathways	WP_ACUTE_VIRAL_MYOCARDITIS	Acute Viral Myocarditis	58	0.3294	1.145	0.275058	0.490662	1	1763	tags=22%, list=12%, signal=25%
Reactome	REACTOME_RECOGNITION_OF_DNA_DAMAGE_BY_PCNA_CONTAINING_REPLICATION_COMPLEX	Recognition Of Dna Damage By Pcna Containing Replication Complex	30	0.367	1.1444	0.279009	0.409696	1	5908	tags=57%, list=40%, signal=94%
WikiPathways	WP_PATHOGENIC_ESCHERICHIA_COLI_INFECTION	Pathogenic Escherichia Coli Infection	44	0.3356	1.1435	0.264885	0.492009	1	4308	tags=43%, list=29%, signal=61%
WikiPathways	WP_TGFBETA_RECEPTOR_SIGNALING_IN_SKELETAL_DYSPLASIAS	Tgfbeta Receptor Signaling In Skeletal Dysplasias	45	0.3391	1.1429	0.28024	0.491253	1	907	tags=18%, list=6%, signal=19%
Reactome	REACTOME_SIGNALING_BY_MODERATE_KINASE_ACTIVITY_BRAF_MUTANTS	Signaling By Moderate Kinase Activity Braf Mutants	34	0.3531	1.1403	0.287706	0.41706	1	4465	tags=41%, list=30%, signal=59%
Reactome	REACTOME_VISUAL_PHOTOTRANSDUCTION	Visual Phototransduction	48	0.3332	1.1403	0.269278	0.41631	1	3644	tags=31%, list=25%, signal=41%
WikiPathways	WP_GLYCOSAMINOGLYCAN_SYNTHESIS_IN_FIBROBLASTS	Glycosaminoglycan Synthesis In Fibroblasts	34	0.3521	1.1395	0.287469	0.497044	1	4437	tags=50%, list=30%, signal=71%
Reactome	REACTOME_NEUROTRANSMITTER_RELEASE_CYCLE	Neurotransmitter Release Cycle	25	0.3739	1.1382	0.291339	0.419563	1	851	tags=20%, list=6%, signal=21%
WikiPathways	WP_INTRACELLULAR_TRAFFICKING_PROTEINS_INVOLVED_IN_CMT_NEUROPATHY	Intracellular Trafficking Proteins Involved In Cmt Neuropathy	22	0.3934	1.1372	0.272237	0.500249	1	3109	tags=36%, list=21%, signal=46%
Reactome	REACTOME_NR1H3_NR1H2_REGULATE_GENE_EXPRESSION_LINKED_TO_CHOLESTEROL_TRANSPORT_AND_EFFLUX	Nr1H3 Nr1H2 Regulate Gene Expression Linked To Cholesterol Transport And Efflux	32	0.3588	1.1361	0.284987	0.423114	1	3134	tags=34%, list=21%, signal=44%
Reactome	REACTOME_TERMINATION_OF_TRANSLESION_DNA_SYNTHESIS	Termination Of Translesion Dna Synthesis	29	0.3629	1.1352	0.280206	0.424127	1	5908	tags=55%, list=40%, signal=92%
WikiPathways	WP_4HYDROXYTAMOXIFEN_DEXAMETHASONE_AND_RETINOIC_ACIDS_REGULATION_OF_P27_EXPRESSION	4Hydroxytamoxifen Dexamethasone And Retinoic Acids Regulation Of P27 Expression	25	0.3783	1.1347	0.297443	0.50383	1	2410	tags=36%, list=16%, signal=43%
Reactome	REACTOME_FORMATION_OF_THE_CANONICAL_BAF_CBAF_COMPLEX	Formation Of The Canonical Baf Cbaf Complex	16	0.4093	1.134	0.298146	0.425807	1	2125	tags=25%, list=14%, signal=29%
Reactome	REACTOME_TRANSCRIPTIONAL_REGULATION_BY_TP53	Transcriptional Regulation By Tp53	314	0.2734	1.1333	0.181635	0.426366	1	3225	tags=24%, list=22%, signal=30%
WikiPathways	WP_NEURAL_CREST_CELL_MIGRATION_IN_CANCER	Neural Crest Cell Migration In Cancer	32	0.3554	1.1311	0.304293	0.510058	1	2797	tags=38%, list=19%, signal=46%
Reactome	REACTOME_PLASMA_LIPOPROTEIN_CLEARANCE	Plasma Lipoprotein Clearance	27	0.3705	1.1309	0.286853	0.430316	1	3481	tags=44%, list=24%, signal=58%
Reactome	REACTOME_NCAM_SIGNALING_FOR_NEURITE_OUT_GROWTH	Ncam Signaling For Neurite Out Growth	40	0.3431	1.1305	0.272956	0.430257	1	3262	tags=35%, list=22%, signal=45%
WikiPathways	WP_GLYCEROLIPIDS_AND_GLYCEROPHOSPHOLIPIDS	Glycerolipids And Glycerophospholipids	19	0.4034	1.1303	0.305108	0.509891	1	4183	tags=53%, list=28%, signal=73%
WikiPathways	WP_IL11_SIGNALING	Il11 Signaling	40	0.3396	1.1303	0.285538	0.507895	1	1844	tags=23%, list=12%, signal=26%
Hallmarks	HALLMARK_ESTROGEN_RESPONSE_EARLY	Estrogen Response Early	151	0.2849	1.13	0.230367	0.319404	1	1447	tags=19%, list=10%, signal=20%
Reactome	REACTOME_TRANSLESION_SYNTHESIS_BY_Y_FAMILY_DNA_POLYMERASES_BYPASSES_LESIONS_ON_DNA_TEMPLATE	Translesion Synthesis By Y Family Dna Polymerases Bypasses Lesions On Dna Template	36	0.3479	1.13	0.286616	0.430472	1	3955	tags=36%, list=27%, signal=49%
WikiPathways	WP_ACUTE_MYELOID_LEUKEMIA	Acute Myeloid Leukemia	50	0.3284	1.1299	0.294187	0.50675	1	2650	tags=28%, list=18%, signal=34%
Reactome	REACTOME_SLC_MEDIATED_TRANSMEMBRANE_TRANSPORT	Slc Mediated Transmembrane Transport	122	0.2918	1.1276	0.260823	0.4345	1	2000	tags=22%, list=14%, signal=25%
WikiPathways	WP_TRYPTOPHAN_METABOLISM	Tryptophan Metabolism	18	0.4096	1.1269	0.298969	0.511172	1	4088	tags=39%, list=28%, signal=54%
WikiPathways	WP_UREA_CYCLE_AND_ASSOCIATED_PATHWAYS	Urea Cycle And Associated Pathways	16	0.4141	1.1259	0.320225	0.51137	1	2254	tags=25%, list=15%, signal=29%
Reactome	REACTOME_RAB_GEFS_EXCHANGE_GTP_FOR_GDP_ON_RABS	Rab Gefs Exchange Gtp For Gdp On Rabs	81	0.3022	1.1259	0.278027	0.4373	1	4690	tags=38%, list=32%, signal=56%
Reactome	REACTOME_CLASS_B_2_SECRETIN_FAMILY_RECEPTORS	Class B 2 Secretin Family Receptors	28	0.361	1.1255	0.310777	0.437462	1	2229	tags=25%, list=15%, signal=29%
WikiPathways	WP_DNA_DAMAGE_RESPONSE_ONLY_ATM_DEPENDENT	Dna Damage Response Only Atm Dependent	84	0.3018	1.1238	0.285063	0.514152	1	2650	tags=27%, list=18%, signal=33%
Reactome	REACTOME_INTERLEUKIN_7_SIGNALING	Interleukin 7 Signaling	26	0.3686	1.1233	0.299346	0.441184	1	3229	tags=46%, list=22%, signal=59%
Reactome	REACTOME_ABERRANT_REGULATION_OF_MITOTIC_G1_S_TRANSITION_IN_CANCER_DUE_TO_RB1_DEFECTS	Aberrant Regulation Of Mitotic G1 S Transition In Cancer Due To Rb1 Defects	15	0.4199	1.1229	0.332374	0.441148	1	3087	tags=33%, list=21%, signal=42%
Reactome	REACTOME_PLATELET_AGGREGATION_PLUG_FORMATION	Platelet Aggregation Plug Formation	22	0.3851	1.1224	0.322057	0.441355	1	2318	tags=32%, list=16%, signal=38%
Reactome	REACTOME_GLYCOSAMINOGLYCAN_METABOLISM	Glycosaminoglycan Metabolism	101	0.2899	1.1201	0.273218	0.445328	1	3829	tags=36%, list=26%, signal=48%
Reactome	REACTOME_DENGUE_VIRUS_MODULATES_APOPTOSIS	Dengue Virus Modulates Apoptosis	16	0.4082	1.1185	0.329132	0.44784	1	2452	tags=31%, list=17%, signal=37%
Reactome	REACTOME_SIGNALING_BY_VEGF	Signaling By Vegf	88	0.299	1.1163	0.285872	0.451246	1	2626	tags=25%, list=18%, signal=30%
WikiPathways	WP_INHIBITION_OF_EXOSOME_BIOGENESIS_AND_SECRETION_BY_MANUMYCIN_A_IN_CRPC_CELLS	Inhibition Of Exosome Biogenesis And Secretion By Manumycin A In Crpc Cells	17	0.4132	1.1131	0.348506	0.536424	1	2575	tags=29%, list=17%, signal=36%
WikiPathways	WP_FATTY_ACID_AND_LIPOPROTEIN_TRANSPORT_IN_HEPATOCYTES	Fatty Acid And Lipoprotein Transport In Hepatocytes	275	0.2719	1.1116	0.23296	0.53774	1	3692	tags=32%, list=25%, signal=42%
Reactome	REACTOME_INTERACTION_BETWEEN_L1_AND_ANKYRINS	Interaction Between L1 And Ankyrins	16	0.4122	1.1114	0.311989	0.460663	1	3373	tags=50%, list=23%, signal=65%
WikiPathways	WP_PROSTAGLANDIN_AND_LEUKOTRIENE_METABOLISM_IN_SENESCENCE	Prostaglandin And Leukotriene Metabolism In Senescence	20	0.3875	1.1102	0.337432	0.539066	1	2122	tags=30%, list=14%, signal=35%
Reactome	REACTOME_SENSORY_PROCESSING_OF_SOUND_BY_OUTER_HAIR_CELLS_OF_THE_COCHLEA	Sensory Processing Of Sound By Outer Hair Cells Of The Cochlea	26	0.3679	1.11	0.335958	0.462801	1	3399	tags=35%, list=23%, signal=45%
Reactome	REACTOME_REGULATION_OF_PTEN_GENE_TRANSCRIPTION	Regulation Of Pten Gene Transcription	54	0.3218	1.1083	0.308962	0.465381	1	4962	tags=43%, list=34%, signal=64%
WikiPathways	WP_MODULATORS_OF_TCR_SIGNALING_AND_T_CELL_ACTIVATION	Modulators Of Tcr Signaling And T Cell Activation	42	0.3292	1.1055	0.322055	0.547562	1	1896	tags=19%, list=13%, signal=22%
Reactome	REACTOME_RECRUITMENT_OF_MITOTIC_CENTROSOME_PROTEINS_AND_COMPLEXES	Recruitment Of Mitotic Centrosome Proteins And Complexes	75	0.3041	1.1049	0.31448	0.471613	1	4829	tags=39%, list=33%, signal=57%
WikiPathways	WP_NEUROGENESIS_REGULATION_IN_THE_OLFACTORY_EPITHELIUM	Neurogenesis Regulation In The Olfactory Epithelium	35	0.3422	1.1036	0.346008	0.549874	1	2931	tags=31%, list=20%, signal=39%
Hallmarks	HALLMARK_PEROXISOME	Peroxisome	82	0.2965	1.103	0.324385	0.359676	1	2227	tags=21%, list=15%, signal=24%
Reactome	REACTOME_ORGANELLE_BIOGENESIS_AND_MAINTENANCE	Organelle Biogenesis And Maintenance	261	0.2688	1.1027	0.253293	0.475462	1	3479	tags=25%, list=24%, signal=32%
WikiPathways	WP_MITOCHONDRIAL_FATTY_ACID_OXIDATION_DISORDERS	Mitochondrial Fatty Acid Oxidation Disorders	18	0.3938	1.1023	0.356633	0.550866	1	858	tags=17%, list=6%, signal=18%
Reactome	REACTOME_FORMATION_OF_THE_EMBRYONIC_STEM_CELL_BAF_ESBAF_COMPLEX	Formation Of The Embryonic Stem Cell Baf Esbaf Complex	16	0.4005	1.1022	0.329041	0.475473	1	2125	tags=25%, list=14%, signal=29%
Reactome	REACTOME_UPTAKE_AND_ACTIONS_OF_BACTERIAL_TOXINS	Uptake And Actions Of Bacterial Toxins	24	0.3687	1.101	0.333333	0.477247	1	3068	tags=38%, list=21%, signal=47%
WikiPathways	WP_TCA_CYCLE_AKA_KREBS_OR_CITRIC_ACID_CYCLE	Tca Cycle Aka Krebs Or Citric Acid Cycle	18	0.3931	1.1006	0.340192	0.552589	1	4139	tags=39%, list=28%, signal=54%
WikiPathways	WP_CHROMOSOMAL_AND_MICROSATELLITE_INSTABILITY_IN_COLORECTAL_CANCER	Chromosomal And Microsatellite Instability In Colorectal Cancer	67	0.3035	1.1005	0.32151	0.550584	1	1583	tags=21%, list=11%, signal=23%
Reactome	REACTOME_VEGFR2_MEDIATED_VASCULAR_PERMEABILITY	Vegfr2 Mediated Vascular Permeability	23	0.3722	1.0984	0.342667	0.481889	1	2390	tags=30%, list=16%, signal=36%
Reactome	REACTOME_MITOTIC_METAPHASE_AND_ANAPHASE	Mitotic Metaphase And Anaphase	208	0.273	1.0984	0.270576	0.481139	1	4160	tags=35%, list=28%, signal=48%
Reactome	REACTOME_TP53_REGULATES_TRANSCRIPTION_OF_ADDITIONAL_CELL_CYCLE_GENES_WHOSE_EXACT_ROLE_IN_THE_P53_PATHWAY_REMAIN_UNCERTAIN	Tp53 Regulates Transcription Of Additional Cell Cycle Genes Whose Exact Role In The P53 Pathway Remain Uncertain	19	0.3882	1.0982	0.347765	0.480627	1	927	tags=16%, list=6%, signal=17%
WikiPathways	WP_DYRK1A_INVOLVEMENT_REGARDING_CELL_PROLIFERATION_IN_BRAIN_DEVELOPMENT	Dyrk1A Involvement Regarding Cell Proliferation In Brain Development	54	0.315	1.0967	0.329009	0.557435	1	3419	tags=30%, list=23%, signal=38%
Reactome	REACTOME_SPRY_REGULATION_OF_FGF_SIGNALING	Spry Regulation Of Fgf Signaling	16	0.407	1.0965	0.350427	0.483395	1	3127	tags=38%, list=21%, signal=48%
WikiPathways	WP_IL7_SIGNALING	Il7 Signaling	21	0.3706	1.0962	0.348118	0.556508	1	3180	tags=38%, list=22%, signal=48%
Reactome	REACTOME_NEGATIVE_REGULATION_OF_THE_PI3K_AKT_NETWORK	Negative Regulation Of The Pi3K Akt Network	77	0.2999	1.0955	0.322148	0.484438	1	2449	tags=27%, list=17%, signal=33%
WikiPathways	WP_HEPATITIS_B_INFECTION	Hepatitis B Infection	122	0.2794	1.0948	0.308839	0.557783	1	1852	tags=20%, list=13%, signal=22%
Reactome	REACTOME_RHOC_GTPASE_CYCLE	Rhoc Gtpase Cycle	69	0.2987	1.0943	0.308571	0.486007	1	2454	tags=25%, list=17%, signal=29%
Reactome	REACTOME_INTERFERON_ALPHA_BETA_SIGNALING	Interferon Alpha Beta Signaling	44	0.3219	1.0935	0.333738	0.486904	1	4395	tags=39%, list=30%, signal=55%
WikiPathways	WP_TGFBETA_RECEPTOR_SIGNALING	Tgfbeta Receptor Signaling	43	0.3285	1.0934	0.348093	0.55894	1	846	tags=16%, list=6%, signal=17%
Reactome	REACTOME_CELLULAR_RESPONSE_TO_HEAT_STRESS	Cellular Response To Heat Stress	90	0.2911	1.0909	0.323757	0.491663	1	3985	tags=29%, list=27%, signal=39%
Reactome	REACTOME_DISEASES_ASSOCIATED_WITH_GLYCOSAMINOGLYCAN_METABOLISM	Diseases Associated With Glycosaminoglycan Metabolism	32	0.3358	1.0901	0.349552	0.492543	1	3515	tags=38%, list=24%, signal=49%
Reactome	REACTOME_RESPIRATORY_SYNCYTIAL_VIRUS_INFECTION_PATHWAY	Respiratory Syncytial Virus Infection Pathway	96	0.2835	1.0897	0.326819	0.492558	1	4292	tags=35%, list=29%, signal=50%
Reactome	REACTOME_ENDOGENOUS_STEROLS	Endogenous Sterols	16	0.3976	1.0886	0.37409	0.494124	1	2109	tags=31%, list=14%, signal=36%
WikiPathways	WP_PERTURBATIONS_TO_HOSTCELL_AUTOPHAGY_INDUCED_BY_SARSCOV2_PROTEINS	Perturbations To Hostcell Autophagy Induced By Sarscov2 Proteins	43	0.3305	1.0878	0.353428	0.56959	1	1957	tags=21%, list=13%, signal=24%
WikiPathways	WP_INTERACTIONS_BETWEEN_LOXL4_AND_OXIDATIVE_STRESS_PATHWAY	Interactions Between Loxl4 And Oxidative Stress Pathway	16	0.4037	1.0871	0.346101	0.569094	1	2053	tags=38%, list=14%, signal=44%
Reactome	REACTOME_INTERFERON_SIGNALING	Interferon Signaling	208	0.2692	1.0869	0.281837	0.497065	1	3834	tags=28%, list=26%, signal=37%
WikiPathways	WP_PROLACTIN_SIGNALING	Prolactin Signaling	66	0.3025	1.0853	0.349315	0.571196	1	1333	tags=17%, list=9%, signal=18%
WikiPathways	WP_15Q25_COPY_NUMBER_VARIATION	15Q25 Copy Number Variation	30	0.3496	1.0852	0.357326	0.569385	1	187	tags=10%, list=1%, signal=10%
WikiPathways	WP_OXYSTEROLS_DERIVED_FROM_CHOLESTEROL	Oxysterols Derived From Cholesterol	23	0.3679	1.0844	0.373832	0.569038	1	3979	tags=43%, list=27%, signal=59%
WikiPathways	WP_PI3KAKT_SIGNALING	Pi3Kakt Signaling	213	0.2682	1.0841	0.30547	0.567667	1	3413	tags=30%, list=23%, signal=38%
Reactome	REACTOME_RNA_POLYMERASE_III_TRANSCRIPTION	Rna Polymerase Iii Transcription	40	0.3267	1.0838	0.339416	0.502959	1	3330	tags=28%, list=23%, signal=35%
WikiPathways	WP_ARYL_HYDROCARBON_RECEPTOR_PATHWAY_WP2586	Aryl Hydrocarbon Receptor Pathway Wp2586	37	0.3323	1.0838	0.35741	0.566407	1	1739	tags=19%, list=12%, signal=21%
Reactome	REACTOME_SEPARATION_OF_SISTER_CHROMATIDS	Separation Of Sister Chromatids	164	0.2713	1.0829	0.316894	0.50384	1	4890	tags=43%, list=33%, signal=63%
WikiPathways	WP_ESTROGEN_SIGNALING	Estrogen Signaling	21	0.3731	1.082	0.361299	0.568629	1	672	tags=14%, list=5%, signal=15%
WikiPathways	WP_TRANSLATION_INHIBITORS_IN_CHRONICALLY_ACTIVATED_PDGFRA_CELLS	Translation Inhibitors In Chronically Activated Pdgfra Cells	43	0.3212	1.0818	0.330061	0.566966	1	1957	tags=26%, list=13%, signal=29%
Reactome	REACTOME_INTRA_GOLGI_AND_RETROGRADE_GOLGI_TO_ER_TRAFFIC	Intra Golgi And Retrograde Golgi To Er Traffic	178	0.2698	1.081	0.318511	0.507127	1	3260	tags=24%, list=22%, signal=31%
Hallmarks	HALLMARK_MTORC1_SIGNALING	Mtorc1 Signaling	193	0.2688	1.0797	0.303534	0.395629	1	2630	tags=23%, list=18%, signal=27%
WikiPathways	WP_CARDIOMYOCYTE_SIGNALING_CONVERGING_ON_TITIN	Cardiomyocyte Signaling Converging On Titin	22	0.3652	1.0791	0.382008	0.571017	1	2428	tags=32%, list=16%, signal=38%
WikiPathways	WP_AGERELATED_MACULAR_DEGENERATION	Agerelated Macular Degeneration	16	0.3973	1.0786	0.376033	0.570297	1	1957	tags=25%, list=13%, signal=29%
WikiPathways	WP_IL3_SIGNALING	Il3 Signaling	36	0.3335	1.0735	0.364882	0.579768	1	2433	tags=25%, list=16%, signal=30%
Reactome	REACTOME_SIGNALING_BY_INSULIN_RECEPTOR	Signaling By Insulin Receptor	58	0.3072	1.073	0.354265	0.523223	1	1572	tags=21%, list=11%, signal=23%
Reactome	REACTOME_OVARIAN_TUMOR_DOMAIN_PROTEASES	Ovarian Tumor Domain Proteases	31	0.3425	1.0727	0.368153	0.52283	1	3972	tags=39%, list=27%, signal=53%
WikiPathways	WP_PLEURAL_MESOTHELIOMA	Pleural Mesothelioma	310	0.2598	1.0722	0.310171	0.580762	1	3193	tags=27%, list=22%, signal=34%
WikiPathways	WP_NANOPARTICLEMEDIATED_ACTIVATION_OF_RECEPTOR_SIGNALING	Nanoparticlemediated Activation Of Receptor Signaling	22	0.3631	1.072	0.372813	0.579005	1	1327	tags=18%, list=9%, signal=20%
WikiPathways	WP_KISSPEPTINKISSPEPTIN_RECEPTOR_SYSTEM_IN_THE_OVARY	Kisspeptinkisspeptin Receptor System In The Ovary	27	0.3442	1.0706	0.377863	0.580114	1	2436	tags=30%, list=17%, signal=35%
WikiPathways	WP_DNA_REPLICATION	Dna Replication	41	0.3253	1.0704	0.368165	0.578635	1	5908	tags=59%, list=40%, signal=97%
WikiPathways	WP_MTHFR_DEFICIENCY	Mthfr Deficiency	17	0.381	1.0702	0.370423	0.577061	1	4005	tags=41%, list=27%, signal=56%
Reactome	REACTOME_SIGNALING_BY_PDGF	Signaling By Pdgf	46	0.3125	1.0697	0.373333	0.528492	1	1846	tags=24%, list=13%, signal=27%
Reactome	REACTOME_O_LINKED_GLYCOSYLATION_OF_MUCINS	O Linked Glycosylation Of Mucins	30	0.3446	1.068	0.389696	0.531167	1	2935	tags=37%, list=20%, signal=46%
Reactome	REACTOME_MAPK_TARGETS_NUCLEAR_EVENTS_MEDIATED_BY_MAP_KINASES	Mapk Targets Nuclear Events Mediated By Map Kinases	30	0.344	1.0677	0.37664	0.53095	1	2144	tags=23%, list=15%, signal=27%
Hallmarks	HALLMARK_BILE_ACID_METABOLISM	Bile Acid Metabolism	71	0.2948	1.0664	0.369565	0.412406	1	3626	tags=25%, list=25%, signal=33%
WikiPathways	WP_MAPK_PATHWAY_IN_CONGENITAL_THYROID_CANCER	Mapk Pathway In Congenital Thyroid Cancer	16	0.3982	1.0659	0.397297	0.584723	1	1333	tags=25%, list=9%, signal=27%
Hallmarks	HALLMARK_ALLOGRAFT_REJECTION	Allograft Rejection	96	0.2861	1.0654	0.359563	0.402702	1	3668	tags=29%, list=25%, signal=39%
WikiPathways	WP_GASTRIN_SIGNALING	Gastrin Signaling	100	0.2806	1.0643	0.358553	0.586192	1	1600	tags=18%, list=11%, signal=20%
WikiPathways	WP_CAFFEINE_IN_BLOOD_VESSELS	Caffeine In Blood Vessels	21	0.3626	1.0618	0.374502	0.589709	1	3151	tags=33%, list=21%, signal=42%
WikiPathways	WP_EPO_RECEPTOR_SIGNALING	Epo Receptor Signaling	23	0.3516	1.0611	0.386612	0.589068	1	2558	tags=30%, list=17%, signal=37%
Reactome	REACTOME_SYNTHESIS_OF_PC	Synthesis Of Pc	22	0.3635	1.0608	0.405114	0.545046	1	3518	tags=36%, list=24%, signal=48%
Reactome	REACTOME_MISMATCH_REPAIR	Mismatch Repair	15	0.3965	1.0605	0.380818	0.54483	1	2363	tags=27%, list=16%, signal=32%
Reactome	REACTOME_DAG1_GLYCOSYLATIONS	Dag1 Glycosylations	17	0.3809	1.0601	0.410811	0.5447	1	3751	tags=35%, list=25%, signal=47%
Reactome	REACTOME_PYRUVATE_METABOLISM	Pyruvate Metabolism	42	0.3196	1.0597	0.39532	0.544623	1	3592	tags=29%, list=24%, signal=38%
Reactome	REACTOME_GLYCOGEN_METABOLISM	Glycogen Metabolism	23	0.3556	1.0592	0.398396	0.544837	1	3127	tags=35%, list=21%, signal=44%
Reactome	REACTOME_CITRIC_ACID_CYCLE_TCA_CYCLE	Citric Acid Cycle Tca Cycle	33	0.3298	1.0587	0.3861	0.544968	1	5717	tags=52%, list=39%, signal=84%
WikiPathways	WP_DEREGULATING_CELLULAR_METABOLISM_THROUGH_NONGENOTOXIC_CARCINOGENS	Deregulating Cellular Metabolism Through Nongenotoxic Carcinogens	21	0.3698	1.0586	0.408	0.592438	1	3726	tags=38%, list=25%, signal=51%
Reactome	REACTOME_MRNA_SPLICING	Mrna Splicing	201	0.2609	1.0578	0.373717	0.545786	1	4076	tags=27%, list=28%, signal=37%
Reactome	REACTOME_SIGNALING_BY_PTK6	Signaling By Ptk6	44	0.3133	1.0578	0.386199	0.544968	1	3127	tags=32%, list=21%, signal=40%
Hallmarks	HALLMARK_TGF_BETA_SIGNALING	Tgf Beta Signaling	49	0.3095	1.0574	0.379686	0.406634	1	1778	tags=20%, list=12%, signal=23%
Reactome	REACTOME_SPHINGOLIPID_METABOLISM	Sphingolipid Metabolism	81	0.2865	1.0566	0.384091	0.546593	1	3750	tags=32%, list=25%, signal=43%
WikiPathways	WP_IL2_SIGNALING	Il2 Signaling	33	0.328	1.056	0.397683	0.596381	1	1333	tags=18%, list=9%, signal=20%
WikiPathways	WP_PURINERGIC_SIGNALING	Purinergic Signaling	17	0.3801	1.0547	0.406877	0.597267	1	850	tags=24%, list=6%, signal=25%
Reactome	REACTOME_INTEGRIN_SIGNALING	Integrin Signaling	20	0.3658	1.0543	0.395664	0.55061	1	1333	tags=25%, list=9%, signal=27%
Hallmarks	HALLMARK_NOTCH_SIGNALING	Notch Signaling	26	0.3504	1.053	0.410783	0.404414	1	3419	tags=38%, list=23%, signal=50%
Reactome	REACTOME_RRNA_MODIFICATION_IN_THE_NUCLEUS_AND_CYTOSOL	Rrna Modification In The Nucleus And Cytosol	57	0.2983	1.0519	0.380668	0.554952	1	4305	tags=32%, list=29%, signal=44%
Reactome	REACTOME_DISEASES_OF_SIGNAL_TRANSDUCTION_BY_GROWTH_FACTOR_RECEPTORS_AND_SECOND_MESSENGERS	Diseases Of Signal Transduction By Growth Factor Receptors And Second Messengers	375	0.2507	1.0516	0.357071	0.554558	1	3230	tags=26%, list=22%, signal=32%
WikiPathways	WP_PROTEOGLYCAN_BIOSYNTHESIS	Proteoglycan Biosynthesis	18	0.3723	1.0489	0.409027	0.608078	1	4437	tags=56%, list=30%, signal=79%
WikiPathways	WP_TYPE_2_PAPILLARY_RENAL_CELL_CARCINOMA	Type 2 Papillary Renal Cell Carcinoma	29	0.3365	1.0488	0.40081	0.606243	1	2181	tags=24%, list=15%, signal=28%
WikiPathways	WP_CILIARY_LANDSCAPE	Ciliary Landscape	197	0.2582	1.0447	0.394656	0.613363	1	3624	tags=25%, list=25%, signal=33%
WikiPathways	WP_NETRINUNC5B_SIGNALING	Netrinunc5B Signaling	36	0.3228	1.0445	0.398022	0.611849	1	3106	tags=31%, list=21%, signal=39%
Reactome	REACTOME_NRAGE_SIGNALS_DEATH_THROUGH_JNK	Nrage Signals Death Through Jnk	43	0.3116	1.0427	0.420616	0.572939	1	2458	tags=28%, list=17%, signal=33%
Hallmarks	HALLMARK_WNT_BETA_CATENIN_SIGNALING	Wnt Beta Catenin Signaling	32	0.3328	1.0413	0.40975	0.41548	1	3414	tags=28%, list=23%, signal=37%
WikiPathways	WP_MFAP5_EFFECT_ON_PERMEABILITY_AND_MOTILITY_OF_ENDOTHELIAL_CELLS_VIA_CYTOSKELETON_REARRANGEMENT	Mfap5 Effect On Permeability And Motility Of Endothelial Cells Via Cytoskeleton Rearrangement	15	0.3934	1.0387	0.420085	0.6227	1	849	tags=20%, list=6%, signal=21%
WikiPathways	WP_APOPTOSISRELATED_NETWORK_DUE_TO_ALTERED_NOTCH3_IN_OVARIAN_CANCER	Apoptosisrelated Network Due To Altered Notch3 In Ovarian Cancer	51	0.3012	1.0385	0.417647	0.621121	1	3342	tags=29%, list=23%, signal=38%
WikiPathways	WP_AMPACTIVATED_PROTEIN_KINASE_SIGNALING	Ampactivated Protein Kinase Signaling	54	0.2974	1.0381	0.423475	0.620011	1	2635	tags=28%, list=18%, signal=34%
WikiPathways	WP_PHOTODYNAMIC_THERAPYINDUCED_AP1_SURVIVAL_SIGNALING	Photodynamic Therapyinduced Ap1 Survival Signaling	43	0.3085	1.0379	0.416867	0.618432	1	2819	tags=28%, list=19%, signal=34%
Reactome	REACTOME_CD28_DEPENDENT_PI3K_AKT_SIGNALING	Cd28 Dependent Pi3K Akt Signaling	20	0.3632	1.0375	0.417425	0.583507	1	2410	tags=35%, list=16%, signal=42%
Reactome	REACTOME_INTERLEUKIN_12_FAMILY_SIGNALING	Interleukin 12 Family Signaling	42	0.3072	1.0373	0.431873	0.582825	1	3944	tags=36%, list=27%, signal=49%
Reactome	REACTOME_SMAD2_SMAD3_SMAD4_HETEROTRIMER_REGULATES_TRANSCRIPTION	Smad2 Smad3 Smad4 Heterotrimer Regulates Transcription	35	0.3182	1.0368	0.412798	0.583074	1	3127	tags=29%, list=21%, signal=36%
Reactome	REACTOME_ACTIVATED_NOTCH1_TRANSMITS_SIGNAL_TO_THE_NUCLEUS	Activated Notch1 Transmits Signal To The Nucleus	24	0.348	1.0352	0.418109	0.585374	1	3419	tags=46%, list=23%, signal=60%
WikiPathways	WP_ERBB_SIGNALING	Erbb Signaling	76	0.282	1.0348	0.44457	0.62337	1	2819	tags=28%, list=19%, signal=34%
Reactome	REACTOME_NEGATIVE_REGULATION_OF_FGFR4_SIGNALING	Negative Regulation Of Fgfr4 Signaling	21	0.3622	1.0314	0.440559	0.592568	1	3127	tags=38%, list=21%, signal=48%
Reactome	REACTOME_TRANSCRIPTION_OF_THE_HIV_GENOME	Transcription Of The Hiv Genome	64	0.2884	1.0306	0.424942	0.593321	1	3107	tags=27%, list=21%, signal=34%
Reactome	REACTOME_METABOLISM_OF_WATER_SOLUBLE_VITAMINS_AND_COFACTORS	Metabolism Of Water Soluble Vitamins And Cofactors	98	0.2713	1.0304	0.42111	0.592777	1	4193	tags=33%, list=28%, signal=45%
WikiPathways	WP_MEASLES_VIRUS_INFECTION	Measles Virus Infection	96	0.2738	1.0294	0.425579	0.633225	1	4355	tags=34%, list=30%, signal=48%
WikiPathways	WP_AGERAGE_PATHWAY	Agerage Pathway	56	0.2953	1.0248	0.421176	0.641362	1	3228	tags=23%, list=22%, signal=30%
Reactome	REACTOME_DEPOLYMERIZATION_OF_THE_NUCLEAR_LAMINA	Depolymerization Of The Nuclear Lamina	15	0.387	1.0247	0.443038	0.604253	1	2182	tags=33%, list=15%, signal=39%
Reactome	REACTOME_APC_CDC20_MEDIATED_DEGRADATION_OF_NEK2A	Apc Cdc20 Mediated Degradation Of Nek2A	26	0.3354	1.0244	0.449275	0.603848	1	4890	tags=46%, list=33%, signal=69%
Reactome	REACTOME_ERK_MAPK_TARGETS	Erk Mapk Targets	21	0.3528	1.0217	0.438573	0.608874	1	2081	tags=24%, list=14%, signal=28%
Reactome	REACTOME_G_ALPHA_12_13_SIGNALLING_EVENTS	G Alpha 12 13 Signalling Events	56	0.2922	1.0213	0.430572	0.608775	1	2458	tags=25%, list=17%, signal=30%
Reactome	REACTOME_ENERGY_DEPENDENT_REGULATION_OF_MTOR_BY_LKB1_AMPK	Energy Dependent Regulation Of Mtor By Lkb1 Ampk	27	0.3303	1.0203	0.44664	0.609849	1	2625	tags=22%, list=18%, signal=27%
WikiPathways	WP_LIPID_METABOLISM_PATHWAY	Lipid Metabolism Pathway	24	0.339	1.0182	0.424161	0.654079	1	1122	tags=17%, list=8%, signal=18%
Reactome	REACTOME_DEFECTS_IN_VITAMIN_AND_COFACTOR_METABOLISM	Defects In Vitamin And Cofactor Metabolism	20	0.3565	1.0172	0.462963	0.615898	1	975	tags=15%, list=7%, signal=16%
Reactome	REACTOME_SIGNALING_BY_EGFR_IN_CANCER	Signaling By Egfr In Cancer	19	0.3535	1.0158	0.461741	0.617924	1	3127	tags=32%, list=21%, signal=40%
Reactome	REACTOME_HDR_THROUGH_HOMOLOGOUS_RECOMBINATION_HRR	Hdr Through Homologous Recombination Hrr	64	0.2804	1.0153	0.453303	0.617948	1	5091	tags=38%, list=35%, signal=57%
WikiPathways	WP_HYPOTHESIZED_PATHWAYS_IN_PATHOGENESIS_OF_CARDIOVASCULAR_DISEASE	Hypothesized Pathways In Pathogenesis Of Cardiovascular Disease	22	0.3428	1.0151	0.44698	0.658986	1	1333	tags=23%, list=9%, signal=25%
Reactome	REACTOME_SIGNALING_BY_MET	Signaling By Met	61	0.2816	1.0132	0.445867	0.621717	1	2455	tags=21%, list=17%, signal=25%
WikiPathways	WP_BDNFTRKB_SIGNALING	Bdnftrkb Signaling	27	0.3298	1.0131	0.470356	0.661454	1	1333	tags=22%, list=9%, signal=24%
Reactome	REACTOME_REGULATION_OF_TP53_EXPRESSION_AND_DEGRADATION	Regulation Of Tp53 Expression And Degradation	35	0.315	1.0127	0.445431	0.621671	1	3127	tags=26%, list=21%, signal=33%
Reactome	REACTOME_NR1H2_AND_NR1H3_MEDIATED_SIGNALING	Nr1H2 And Nr1H3 Mediated Signaling	37	0.3075	1.0126	0.456633	0.620866	1	3134	tags=32%, list=21%, signal=41%
Reactome	REACTOME_ACTIVATION_OF_BH3_ONLY_PROTEINS	Activation Of Bh3 Only Proteins	25	0.3394	1.0123	0.459387	0.620386	1	2408	tags=24%, list=16%, signal=29%
Reactome	REACTOME_NEGATIVE_REGULATION_OF_MET_ACTIVITY	Negative Regulation Of Met Activity	18	0.3565	1.0113	0.434415	0.621459	1	4407	tags=44%, list=30%, signal=63%
Reactome	REACTOME_NEGATIVE_REGULATION_OF_FGFR1_SIGNALING	Negative Regulation Of Fgfr1 Signaling	20	0.3567	1.0107	0.447958	0.621799	1	3127	tags=35%, list=21%, signal=44%
WikiPathways	WP_SUDDEN_INFANT_DEATH_SYNDROME_SIDS_SUSCEPTIBILITY_PATHWAYS	Sudden Infant Death Syndrome Sids Susceptibility Pathways	87	0.271	1.0106	0.462054	0.66482	1	2123	tags=18%, list=14%, signal=21%
Reactome	REACTOME_CONSTITUTIVE_SIGNALING_BY_LIGAND_RESPONSIVE_EGFR_CANCER_VARIANTS	Constitutive Signaling By Ligand Responsive Egfr Cancer Variants	17	0.3693	1.0091	0.446453	0.624217	1	3127	tags=35%, list=21%, signal=45%
WikiPathways	WP_BREAST_CANCER_PATHWAY	Breast Cancer Pathway	103	0.2664	1.0073	0.452851	0.669785	1	2772	tags=24%, list=19%, signal=30%
WikiPathways	WP_MIRNA_TARGETS_IN_ECM_AND_MEMBRANE_RECEPTORS	Mirna Targets In Ecm And Membrane Receptors	18	0.3539	1.0048	0.461434	0.672982	1	2843	tags=39%, list=19%, signal=48%
WikiPathways	WP_IL5_SIGNALING	Il5 Signaling	36	0.307	1.0024	0.476131	0.676195	1	1333	tags=19%, list=9%, signal=21%
WikiPathways	WP_LEPTIN_SIGNALING	Leptin Signaling	71	0.2748	1.0018	0.481352	0.675454	1	1916	tags=18%, list=13%, signal=21%
WikiPathways	WP_NEUROINFLAMMATION_AND_GLUTAMATERGIC_SIGNALING	Neuroinflammation And Glutamatergic Signaling	91	0.265	1.0016	0.477528	0.673591	1	2976	tags=26%, list=20%, signal=33%
WikiPathways	WP_DNA_MISMATCH_REPAIR	Dna Mismatch Repair	23	0.3337	0.9997	0.492228	0.675719	1	5908	tags=52%, list=40%, signal=87%
WikiPathways	WP_EGFEGFR_SIGNALING	Egfegfr Signaling	143	0.2538	0.9974	0.489407	0.67859	1	3541	tags=27%, list=24%, signal=35%
WikiPathways	WP_INTEGRATIVE_ANALYSIS_OF_TREGGLIAL_INTERACTIONS	Integrative Analysis Of Tregglial Interactions	67	0.2753	0.9971	0.481941	0.677138	1	1763	tags=19%, list=12%, signal=22%
Reactome	REACTOME_ANCHORING_OF_THE_BASAL_BODY_TO_THE_PLASMA_MEMBRANE	Anchoring Of The Basal Body To The Plasma Membrane	91	0.2651	0.9971	0.484118	0.649725	1	4035	tags=31%, list=27%, signal=42%
WikiPathways	WP_MIRTARGETED_GENES_IN_LYMPHOCYTES	Mirtargeted Genes In Lymphocytes	372	0.2382	0.9971	0.497996	0.675161	1	3067	tags=23%, list=21%, signal=28%
Reactome	REACTOME_SARS_COV_1_ACTIVATES_MODULATES_INNATE_IMMUNE_RESPONSES	Sars Cov 1 Activates Modulates Innate Immune Responses	33	0.3109	0.9955	0.471393	0.652091	1	4613	tags=42%, list=31%, signal=62%
Reactome	REACTOME_CONVERSION_FROM_APC_C_CDC20_TO_APC_C_CDH1_IN_LATE_ANAPHASE	Conversion From Apc C Cdc20 To Apc C Cdh1 In Late Anaphase	20	0.3472	0.994	0.486226	0.654189	1	5302	tags=50%, list=36%, signal=78%
WikiPathways	WP_ANK2_PATHWAY_IN_EPILEPSY_DEVELOPMENT	Ank2 Pathway In Epilepsy Development	18	0.3612	0.9917	0.49455	0.684586	1	960	tags=17%, list=7%, signal=18%
Reactome	REACTOME_TRNA_PROCESSING	Trna Processing	107	0.261	0.9908	0.497291	0.659979	1	2464	tags=18%, list=17%, signal=21%
Reactome	REACTOME_PROTEIN_PROTEIN_INTERACTIONS_AT_SYNAPSES	Protein Protein Interactions At Synapses	46	0.2885	0.9904	0.484634	0.659759	1	2793	tags=30%, list=19%, signal=37%
WikiPathways	WP_PYRIMIDINE_METABOLISM_AND_RELATED_DISEASES	Pyrimidine Metabolism And Related Diseases	15	0.3717	0.9891	0.500726	0.688134	1	193	tags=13%, list=1%, signal=13%
Reactome	REACTOME_TP53_REGULATES_TRANSCRIPTION_OF_CELL_CYCLE_GENES	Tp53 Regulates Transcription Of Cell Cycle Genes	44	0.2991	0.989	0.499389	0.661632	1	2408	tags=23%, list=16%, signal=27%
WikiPathways	WP_CHEMOKINE_SIGNALING	Chemokine Signaling	100	0.262	0.9887	0.501094	0.687021	1	2836	tags=27%, list=19%, signal=33%
WikiPathways	WP_TRIACYLGLYCERIDE_SYNTHESIS	Triacylglyceride Synthesis	17	0.3631	0.9881	0.508174	0.686052	1	3983	tags=41%, list=27%, signal=56%
WikiPathways	WP_ROLES_OF_CERAMIDES_IN_DEVELOPMENT_OF_INSULIN_RESISTANCE	Roles Of Ceramides In Development Of Insulin Resistance	15	0.3711	0.9873	0.509915	0.685666	1	2626	tags=27%, list=18%, signal=32%
WikiPathways	WP_VITAMIN_D_IN_INFLAMMATORY_DISEASES	Vitamin D In Inflammatory Diseases	20	0.3445	0.9855	0.508701	0.687425	1	1911	tags=25%, list=13%, signal=29%
Reactome	REACTOME_FCERI_MEDIATED_MAPK_ACTIVATION	Fceri Mediated Mapk Activation	27	0.3216	0.9854	0.507792	0.66853	1	1333	tags=19%, list=9%, signal=20%
WikiPathways	WP_MELANOMA	Melanoma	57	0.2824	0.9848	0.495283	0.686925	1	2667	tags=32%, list=18%, signal=38%
Reactome	REACTOME_INTERFERON_GAMMA_SIGNALING	Interferon Gamma Signaling	56	0.2761	0.9848	0.516471	0.668851	1	2968	tags=27%, list=20%, signal=33%
Reactome	REACTOME_DISASSEMBLY_OF_THE_DESTRUCTION_COMPLEX_AND_RECRUITMENT_OF_AXIN_TO_THE_MEMBRANE	Disassembly Of The Destruction Complex And Recruitment Of Axin To The Membrane	27	0.3208	0.9841	0.505762	0.669319	1	2444	tags=26%, list=17%, signal=31%
WikiPathways	WP_MALE_INFERTILITY	Male Infertility	82	0.2643	0.9838	0.495526	0.687182	1	1767	tags=17%, list=12%, signal=19%
WikiPathways	WP_NEPHROTIC_SYNDROME	Nephrotic Syndrome	32	0.304	0.9827	0.493734	0.687505	1	2251	tags=28%, list=15%, signal=33%
Reactome	REACTOME_KERATAN_SULFATE_BIOSYNTHESIS	Keratan Sulfate Biosynthesis	21	0.3398	0.9807	0.493298	0.675489	1	3829	tags=38%, list=26%, signal=51%
WikiPathways	WP_COVID19_STRUCTURAL_COVERAGE_MAP	Covid19 Structural Coverage Map	19	0.3425	0.9795	0.506139	0.692072	1	3461	tags=37%, list=23%, signal=48%
WikiPathways	WP_ANDROGEN_RECEPTOR_SIGNALING	Androgen Receptor Signaling	81	0.2649	0.979	0.515151	0.691053	1	2650	tags=21%, list=18%, signal=25%
Reactome	REACTOME_MITOCHONDRIAL_CALCIUM_ION_TRANSPORT	Mitochondrial Calcium Ion Transport	20	0.3353	0.9789	0.512162	0.678382	1	3893	tags=35%, list=26%, signal=47%
WikiPathways	WP_GLUCOCORTICOID_RECEPTOR_PATHWAY	Glucocorticoid Receptor Pathway	52	0.2803	0.9768	0.515625	0.69386	1	1777	tags=21%, list=12%, signal=24%
WikiPathways	WP_INITIATION_OF_TRANSCRIPTION_AND_TRANSLATION_ELONGATION_AT_THE_HIV1_LTR	Initiation Of Transcription And Translation Elongation At The Hiv1 Ltr	30	0.3099	0.9767	0.508794	0.691917	1	1520	tags=17%, list=10%, signal=19%
Reactome	REACTOME_HIGH_LAMINAR_FLOW_SHEAR_STRESS_ACTIVATES_SIGNALING_BY_PIEZO1_AND_PECAM1_CDH5_KDR_IN_ENDOTHELIAL_CELLS	High Laminar Flow Shear Stress Activates Signaling By Piezo1 And Pecam1 Cdh5 Kdr In Endothelial Cells	49	0.2839	0.9753	0.506619	0.68507	1	3647	tags=33%, list=25%, signal=43%
Reactome	REACTOME_ECM_PROTEOGLYCANS	Ecm Proteoglycans	49	0.2841	0.9742	0.510843	0.686254	1	3144	tags=29%, list=21%, signal=36%
Reactome	REACTOME_SEMA3A_PAK_DEPENDENT_AXON_REPULSION	Sema3A Pak Dependent Axon Repulsion	15	0.3624	0.9737	0.516174	0.68623	1	2883	tags=33%, list=20%, signal=41%
WikiPathways	WP_HINT1_PATHWAY	Hint1 Pathway	22	0.3318	0.9737	0.503338	0.696484	1	2505	tags=23%, list=17%, signal=27%
Reactome	REACTOME_PROTEIN_METHYLATION	Protein Methylation	17	0.351	0.9737	0.480501	0.685279	1	3502	tags=29%, list=24%, signal=39%
Reactome	REACTOME_CYCLIN_D_ASSOCIATED_EVENTS_IN_G1	Cyclin D Associated Events In G1	42	0.2933	0.9727	0.51677	0.686276	1	3595	tags=31%, list=24%, signal=41%
Reactome	REACTOME_LAMININ_INTERACTIONS	Laminin Interactions	23	0.3236	0.9719	0.523745	0.68698	1	3515	tags=39%, list=24%, signal=51%
Reactome	REACTOME_REGULATION_OF_LIPID_METABOLISM_BY_PPARALPHA	Regulation Of Lipid Metabolism By Pparalpha	100	0.2568	0.9706	0.535792	0.688723	1	3783	tags=31%, list=26%, signal=41%
WikiPathways	WP_FATTY_ACID_BIOSYNTHESIS	Fatty Acid Biosynthesis	20	0.3388	0.9692	0.512616	0.703771	1	1048	tags=15%, list=7%, signal=16%
WikiPathways	WP_JAKSTAT_SIGNALING_IN_THE_REGULATION_OF_BETA_CELLS	Jakstat Signaling In The Regulation Of Beta Cells	24	0.3238	0.9679	0.504685	0.704482	1	3087	tags=33%, list=21%, signal=42%
Reactome	REACTOME_REGULATION_OF_MITF_M_DEPENDENT_GENES_INVOLVED_IN_LYSOSOME_BIOGENESIS_AND_AUTOPHAGY	Regulation Of Mitf M Dependent Genes Involved In Lysosome Biogenesis And Autophagy	17	0.3563	0.9678	0.527665	0.693894	1	3786	tags=41%, list=26%, signal=55%
WikiPathways	WP_EFFECTS_OF_MFN2_MUTATION	Effects Of Mfn2 Mutation	21	0.3337	0.9665	0.530914	0.705436	1	2450	tags=29%, list=17%, signal=34%
Reactome	REACTOME_RNA_POLYMERASE_III_TRANSCRIPTION_TERMINATION	Rna Polymerase Iii Transcription Termination	23	0.3241	0.966	0.514512	0.696492	1	5589	tags=48%, list=38%, signal=77%
WikiPathways	WP_MELATONIN_METABOLISM_AND_EFFECTS	Melatonin Metabolism And Effects	23	0.324	0.9659	0.506073	0.70457	1	2456	tags=26%, list=17%, signal=31%
WikiPathways	WP_CANONICAL_AND_NONCANONICAL_NOTCH_SIGNALING	Canonical And Noncanonical Notch Signaling	19	0.3497	0.9658	0.50565	0.702519	1	3062	tags=32%, list=21%, signal=40%
WikiPathways	WP_BRAINDERIVED_NEUROTROPHIC_FACTOR_BDNF_SIGNALING	Brainderived Neurotrophic Factor Bdnf Signaling	117	0.2505	0.9657	0.546524	0.700821	1	1783	tags=17%, list=12%, signal=19%
Reactome	REACTOME_TRANSPORT_OF_VITAMINS_NUCLEOSIDES_AND_RELATED_MOLECULES	Transport Of Vitamins Nucleosides And Related Molecules	21	0.3333	0.9654	0.520584	0.696809	1	5277	tags=48%, list=36%, signal=74%
Reactome	REACTOME_TP53_REGULATES_TRANSCRIPTION_OF_GENES_INVOLVED_IN_G2_CELL_CYCLE_ARREST	Tp53 Regulates Transcription Of Genes Involved In G2 Cell Cycle Arrest	16	0.3584	0.964	0.504881	0.6987	1	1092	tags=19%, list=7%, signal=20%
Reactome	REACTOME_KERATAN_SULFATE_KERATIN_METABOLISM	Keratan Sulfate Keratin Metabolism	28	0.3082	0.9638	0.532401	0.697918	1	3829	tags=32%, list=26%, signal=43%
Reactome	REACTOME_INTRINSIC_PATHWAY_FOR_APOPTOSIS	Intrinsic Pathway For Apoptosis	48	0.2766	0.9637	0.527011	0.697175	1	3228	tags=25%, list=22%, signal=32%
Reactome	REACTOME_REGULATION_OF_PLK1_ACTIVITY_AT_G2_M_TRANSITION	Regulation Of Plk1 Activity At G2 M Transition	81	0.2617	0.9633	0.545971	0.696843	1	4035	tags=31%, list=27%, signal=42%
Reactome	REACTOME_MITOCHONDRIAL_BIOGENESIS	Mitochondrial Biogenesis	89	0.2539	0.9632	0.555184	0.69606	1	3306	tags=21%, list=22%, signal=27%
Reactome	REACTOME_RHOB_GTPASE_CYCLE	Rhob Gtpase Cycle	64	0.2669	0.9628	0.5183	0.695687	1	1837	tags=20%, list=12%, signal=23%
WikiPathways	WP_COPPER_HOMEOSTASIS	Copper Homeostasis	36	0.2943	0.9624	0.530713	0.705557	1	2080	tags=25%, list=14%, signal=29%
Reactome	REACTOME_TGF_BETA_RECEPTOR_SIGNALING_ACTIVATES_SMADS	Tgf Beta Receptor Signaling Activates Smads	46	0.2864	0.9617	0.534146	0.697037	1	3127	tags=30%, list=21%, signal=38%
Reactome	REACTOME_NPAS4_REGULATES_EXPRESSION_OF_TARGET_GENES	Npas4 Regulates Expression Of Target Genes	15	0.3574	0.9601	0.517434	0.699337	1	2998	tags=27%, list=20%, signal=33%
Reactome	REACTOME_ADORA2B_MEDIATED_ANTI_INFLAMMATORY_CYTOKINES_PRODUCTION	Adora2B Mediated Anti Inflammatory Cytokines Production	29	0.3104	0.9588	0.511968	0.70084	1	2122	tags=24%, list=14%, signal=28%
Reactome	REACTOME_AURKA_ACTIVATION_BY_TPX2	Aurka Activation By Tpx2	66	0.2673	0.9582	0.535179	0.700965	1	3401	tags=26%, list=23%, signal=33%
Reactome	REACTOME_SUMOYLATION_OF_CHROMATIN_ORGANIZATION_PROTEINS	Sumoylation Of Chromatin Organization Proteins	64	0.2695	0.9581	0.529817	0.700136	1	3803	tags=30%, list=26%, signal=40%
Reactome	REACTOME_TRANSCRIPTIONAL_REGULATION_BY_MECP2	Transcriptional Regulation By Mecp2	43	0.283	0.9567	0.535452	0.702116	1	1288	tags=16%, list=9%, signal=18%
WikiPathways	WP_EFFECT_OF_OMEGA3_PUFA_ON_HUNTINGTONS_DISEASE_PATHWAYS	Effect Of Omega3 Pufa On Huntingtons Disease Pathways	86	0.2544	0.956	0.572067	0.716388	1	1957	tags=22%, list=13%, signal=25%
Reactome	REACTOME_SIGNALING_BY_FGFR_IN_DISEASE	Signaling By Fgfr In Disease	49	0.2766	0.955	0.533093	0.70456	1	2799	tags=27%, list=19%, signal=33%
Reactome	REACTOME_EXTENSION_OF_TELOMERES	Extension Of Telomeres	46	0.277	0.9531	0.537983	0.707498	1	3706	tags=28%, list=25%, signal=38%
Reactome	REACTOME_DISEASES_ASSOCIATED_WITH_O_GLYCOSYLATION_OF_PROTEINS	Diseases Associated With O Glycosylation Of Proteins	30	0.3043	0.9529	0.534766	0.706799	1	2772	tags=33%, list=19%, signal=41%
Reactome	REACTOME_REGULATION_OF_CDH1_POSTTRANSLATIONAL_PROCESSING_AND_TRAFFICKING_TO_PLASMA_MEMBRANE	Regulation Of Cdh1 Posttranslational Processing And Trafficking To Plasma Membrane	32	0.3038	0.9527	0.532195	0.706141	1	3751	tags=38%, list=25%, signal=50%
Reactome	REACTOME_MISCELLANEOUS_TRANSPORT_AND_BINDING_EVENTS	Miscellaneous Transport And Binding Events	22	0.3278	0.9522	0.524793	0.706146	1	1246	tags=18%, list=8%, signal=20%
WikiPathways	WP_SHANK3_PATHWAY_INVOLVED_IN_PHELANMCDERMID_SYNDROME	Shank3 Pathway Involved In Phelanmcdermid Syndrome	23	0.3189	0.9515	0.52981	0.723553	1	2793	tags=26%, list=19%, signal=32%
WikiPathways	WP_EPITHELIAL_TO_MESENCHYMAL_TRANSITION_IN_COLORECTAL_CANCER	Epithelial To Mesenchymal Transition In Colorectal Cancer	100	0.2488	0.9502	0.57947	0.723928	1	2913	tags=25%, list=20%, signal=31%
Reactome	REACTOME_APC_C_CDC20_MEDIATED_DEGRADATION_OF_CYCLIN_B	Apc C Cdc20 Mediated Degradation Of Cyclin B	24	0.3178	0.9463	0.557464	0.717087	1	4890	tags=46%, list=33%, signal=68%
WikiPathways	WP_17P133_YWHAE_COPY_NUMBER_VARIATION	17P133 Ywhae Copy Number Variation	16	0.3448	0.9459	0.521429	0.730965	1	6204	tags=63%, list=42%, signal=108%
Reactome	REACTOME_DEVELOPMENTAL_CELL_LINEAGES_OF_THE_INTEGUMENTARY_SYSTEM	Developmental Cell Lineages Of The Integumentary System	29	0.3061	0.9455	0.542784	0.71766	1	786	tags=17%, list=5%, signal=18%
Reactome	REACTOME_RNA_POLYMERASE_II_TRANSCRIBES_SNRNA_GENES	Rna Polymerase Ii Transcribes Snrna Genes	71	0.2615	0.9454	0.569161	0.716774	1	3330	tags=25%, list=23%, signal=33%
WikiPathways	WP_SYNTHESIS_OF_CERAMIDES_AND_1DEOXYCERAMIDES	Synthesis Of Ceramides And 1Deoxyceramides	19	0.3358	0.9449	0.572395	0.730834	1	2698	tags=32%, list=18%, signal=39%
Reactome	REACTOME_RHOA_GTPASE_CYCLE	Rhoa Gtpase Cycle	123	0.2442	0.944	0.611289	0.718503	1	2769	tags=24%, list=19%, signal=29%
WikiPathways	WP_FANCONI_ANEMIA	Fanconi Anemia	45	0.2796	0.9435	0.53706	0.731621	1	4539	tags=33%, list=31%, signal=48%
Reactome	REACTOME_SIGNALING_BY_ERBB4	Signaling By Erbb4	44	0.2793	0.9416	0.561275	0.722439	1	3419	tags=34%, list=23%, signal=44%
Reactome	REACTOME_DOWNREGULATION_OF_TGF_BETA_RECEPTOR_SIGNALING	Downregulation Of Tgf Beta Receptor Signaling	26	0.3065	0.941	0.561198	0.72255	1	3127	tags=31%, list=21%, signal=39%
Reactome	REACTOME_SIGNALING_BY_CSF1_M_CSF_IN_MYELOID_CELLS	Signaling By Csf1 M Csf In Myeloid Cells	27	0.3039	0.9401	0.548128	0.723535	1	3127	tags=33%, list=21%, signal=42%
Reactome	REACTOME_MOLECULES_ASSOCIATED_WITH_ELASTIC_FIBRES	Molecules Associated With Elastic Fibres	23	0.3141	0.9396	0.555118	0.723224	1	1694	tags=22%, list=11%, signal=25%
Reactome	REACTOME_RAB_GERANYLGERANYLATION	Rab Geranylgeranylation	50	0.273	0.9381	0.571767	0.725468	1	3053	tags=24%, list=21%, signal=30%
WikiPathways	WP_KIT_RECEPTOR_SIGNALING	Kit Receptor Signaling	49	0.2731	0.9361	0.567887	0.744655	1	2285	tags=22%, list=15%, signal=26%
Reactome	REACTOME_CONSTITUTIVE_SIGNALING_BY_ABERRANT_PI3K_IN_CANCER	Constitutive Signaling By Aberrant Pi3K In Cancer	48	0.2722	0.9346	0.562347	0.731502	1	1351	tags=21%, list=9%, signal=23%
Reactome	REACTOME_FORMATION_OF_THE_NON_CANONICAL_BAF_NCBAF_COMPLEX	Formation Of The Non Canonical Baf Ncbaf Complex	17	0.3368	0.9344	0.536552	0.730694	1	4987	tags=41%, list=34%, signal=62%
Reactome	REACTOME_SUMOYLATION_OF_INTRACELLULAR_RECEPTORS	Sumoylation Of Intracellular Receptors	25	0.3113	0.932	0.565445	0.734602	1	1911	tags=20%, list=13%, signal=23%
Reactome	REACTOME_CO_INHIBITION_BY_CTLA4	Co Inhibition By Ctla4	17	0.337	0.932	0.552301	0.733522	1	2395	tags=29%, list=16%, signal=35%
WikiPathways	WP_REGULATION_OF_ACTIN_CYTOSKELETON	Regulation Of Actin Cytoskeleton	108	0.2428	0.9318	0.612834	0.751137	1	2928	tags=25%, list=20%, signal=31%
Reactome	REACTOME_RNA_POLYMERASE_II_TRANSCRIPTION_TERMINATION	Rna Polymerase Ii Transcription Termination	64	0.2622	0.9314	0.584615	0.733623	1	2786	tags=19%, list=19%, signal=23%
Reactome	REACTOME_SIGNAL_AMPLIFICATION	Signal Amplification	22	0.3155	0.9304	0.550802	0.734458	1	1890	tags=23%, list=13%, signal=26%
Reactome	REACTOME_PROCESSING_OF_CAPPED_INTRON_CONTAINING_PRE_MRNA	Processing Of Capped Intron Containing Pre Mrna	279	0.2268	0.9303	0.679758	0.733548	1	4234	tags=26%, list=29%, signal=36%
Reactome	REACTOME_REGULATION_OF_PYRUVATE_METABOLISM	Regulation Of Pyruvate Metabolism	32	0.2902	0.9299	0.559045	0.733403	1	3592	tags=31%, list=24%, signal=41%
Reactome	REACTOME_APOPTOTIC_FACTOR_MEDIATED_RESPONSE	Apoptotic Factor Mediated Response	19	0.3277	0.9297	0.565643	0.732601	1	5786	tags=58%, list=39%, signal=95%
Reactome	REACTOME_SYNTHESIS_OF_IP3_AND_IP4_IN_THE_CYTOSOL	Synthesis Of Ip3 And Ip4 In The Cytosol	19	0.3278	0.9291	0.566038	0.732846	1	3036	tags=32%, list=21%, signal=40%
Reactome	REACTOME_CA_DEPENDENT_EVENTS	Ca Dependent Events	27	0.3052	0.9278	0.56697	0.73438	1	2830	tags=26%, list=19%, signal=32%
Reactome	REACTOME_PERK_REGULATES_GENE_EXPRESSION	Perk Regulates Gene Expression	30	0.2958	0.9278	0.583333	0.733323	1	3005	tags=23%, list=20%, signal=29%
WikiPathways	WP_INTEGRATED_BREAST_CANCER_PATHWAY	Integrated Breast Cancer Pathway	140	0.2327	0.9271	0.630137	0.758318	1	2698	tags=21%, list=18%, signal=26%
Reactome	REACTOME_DNA_DAMAGE_BYPASS	Dna Damage Bypass	45	0.2755	0.9269	0.58693	0.734041	1	5908	tags=51%, list=40%, signal=85%
WikiPathways	WP_WNTBETACATENIN_SIGNALING_IN_LEUKEMIA	Wntbetacatenin Signaling In Leukemia	20	0.3194	0.9248	0.564789	0.760765	1	3534	tags=35%, list=24%, signal=46%
Reactome	REACTOME_SIGNALING_BY_FGFR	Signaling By Fgfr	68	0.255	0.9247	0.600229	0.737191	1	3127	tags=31%, list=21%, signal=39%
WikiPathways	WP_4P163_COPY_NUMBER_VARIATION	4P163 Copy Number Variation	28	0.2968	0.9245	0.561381	0.759166	1	4663	tags=43%, list=32%, signal=63%
WikiPathways	WP_NOCGMPPKG_MEDIATED_NEUROPROTECTION	Nocgmppkg Mediated Neuroprotection	19	0.3251	0.9243	0.582069	0.757526	1	3228	tags=37%, list=22%, signal=47%
Reactome	REACTOME_SIGNALING_BY_TGFB_FAMILY_MEMBERS	Signaling By Tgfb Family Members	137	0.2367	0.9237	0.614331	0.738016	1	1796	tags=18%, list=12%, signal=20%
WikiPathways	WP_INTRAFLAGELLAR_TRANSPORT_PROTEINS_BINDING_TO_DYNEIN	Intraflagellar Transport Proteins Binding To Dynein	25	0.3041	0.9232	0.565161	0.757425	1	3579	tags=36%, list=24%, signal=47%
Reactome	REACTOME_RHOQ_GTPASE_CYCLE	Rhoq Gtpase Cycle	54	0.2669	0.9229	0.614371	0.738757	1	2625	tags=22%, list=18%, signal=27%
Reactome	REACTOME_SIGNALING_BY_FGFR3	Signaling By Fgfr3	29	0.2946	0.9222	0.588989	0.739003	1	3127	tags=31%, list=21%, signal=39%
Reactome	REACTOME_SIGNAL_TRANSDUCTION_BY_L1	Signal Transduction By L1	19	0.329	0.9206	0.597811	0.741062	1	1327	tags=21%, list=9%, signal=23%
WikiPathways	WP_TROP2_REGULATORY_SIGNALING	Trop2 Regulatory Signaling	43	0.2744	0.9199	0.582017	0.761761	1	3087	tags=28%, list=21%, signal=35%
Reactome	REACTOME_COPII_MEDIATED_VESICLE_TRANSPORT	Copii Mediated Vesicle Transport	58	0.2627	0.9197	0.60578	0.741684	1	2557	tags=19%, list=17%, signal=23%
Reactome	REACTOME_EVASION_BY_RSV_OF_HOST_INTERFERON_RESPONSES	Evasion By Rsv Of Host Interferon Responses	20	0.3198	0.9176	0.575839	0.744847	1	3127	tags=30%, list=21%, signal=38%
WikiPathways	WP_CYCLINDEPENDENT_KINASE_46_INHIBITORS_IN_BREAST_CANCER	Cyclindependent Kinase 46 Inhibitors In Breast Cancer	31	0.2916	0.9174	0.563882	0.764398	1	3087	tags=32%, list=21%, signal=41%
Reactome	REACTOME_O_GLYCOSYLATION_OF_TSR_DOMAIN_CONTAINING_PROTEINS	O Glycosylation Of Tsr Domain Containing Proteins	16	0.3459	0.9172	0.592645	0.744591	1	2565	tags=38%, list=17%, signal=45%
Reactome	REACTOME_DEVELOPMENTAL_LINEAGES_OF_THE_MAMMARY_GLAND	Developmental Lineages Of The Mammary Gland	20	0.3195	0.917	0.592543	0.743818	1	786	tags=20%, list=5%, signal=21%
WikiPathways	WP_SARSCOV2_INNATE_IMMUNITY_EVASION_AND_CELLSPECIFIC_IMMUNE_RESPONSE	Sarscov2 Innate Immunity Evasion And Cellspecific Immune Response	40	0.2782	0.9162	0.606537	0.764739	1	3510	tags=25%, list=24%, signal=33%
Reactome	REACTOME_HIV_TRANSCRIPTION_INITIATION	Hiv Transcription Initiation	43	0.2696	0.9148	0.598549	0.747181	1	3107	tags=26%, list=21%, signal=32%
Reactome	REACTOME_RAC3_GTPASE_CYCLE	Rac3 Gtpase Cycle	78	0.2458	0.9136	0.631399	0.748444	1	2795	tags=24%, list=19%, signal=30%
Reactome	REACTOME_EPHA_MEDIATED_GROWTH_CONE_COLLAPSE	Epha Mediated Growth Cone Collapse	20	0.3205	0.9121	0.610284	0.750343	1	2101	tags=30%, list=14%, signal=35%
Reactome	REACTOME_HS_GAG_BIOSYNTHESIS	Hs Gag Biosynthesis	22	0.3088	0.9116	0.584022	0.750109	1	3808	tags=36%, list=26%, signal=49%
WikiPathways	WP_GLYCEROPHOSPHOLIPID_BIOSYNTHETIC_PATHWAY	Glycerophospholipid Biosynthetic Pathway	27	0.2976	0.9109	0.59434	0.772762	1	3295	tags=30%, list=22%, signal=38%
Reactome	REACTOME_FGFR2_ALTERNATIVE_SPLICING	Fgfr2 Alternative Splicing	26	0.2977	0.9092	0.587467	0.753633	1	2799	tags=35%, list=19%, signal=43%
WikiPathways	WP_MET_IN_TYPE_1_PAPILLARY_RENAL_CELL_CARCINOMA	Met In Type 1 Papillary Renal Cell Carcinoma	50	0.2612	0.909	0.636364	0.774362	1	2433	tags=26%, list=16%, signal=31%
WikiPathways	WP_MICROTUBULE_CYTOSKELETON_REGULATION	Microtubule Cytoskeleton Regulation	38	0.2743	0.9072	0.617795	0.775744	1	2444	tags=18%, list=17%, signal=22%
WikiPathways	WP_TRANSCRIPTIONAL_REGULATION_OF_MEMORY_B_CELL_DIFFERENTIATION	Transcriptional Regulation Of Memory B Cell Differentiation	27	0.2958	0.9069	0.631854	0.774041	1	5171	tags=56%, list=35%, signal=85%
WikiPathways	WP_OVERLAP_BETWEEN_SIGNAL_TRANSDUCTION_PATHWAYS_CONTRIBUTING_TO_LMNA_LAMINOPATHIES	Overlap Between Signal Transduction Pathways Contributing To Lmna Laminopathies	44	0.2663	0.9069	0.629808	0.772054	1	3087	tags=27%, list=21%, signal=34%
Reactome	REACTOME_SIGNALING_BY_FGFR1	Signaling By Fgfr1	36	0.2799	0.9052	0.611321	0.760219	1	3127	tags=28%, list=21%, signal=35%
Reactome	REACTOME_PHOSPHOLIPID_METABOLISM	Phospholipid Metabolism	160	0.229	0.9047	0.688797	0.760172	1	3518	tags=28%, list=24%, signal=37%
WikiPathways	WP_PHYSICOCHEMICAL_FEATURES_AND_TOXICITYASSOCIATED_PATHWAYS	Physicochemical Features And Toxicityassociated Pathways	51	0.2597	0.902	0.620648	0.779529	1	2877	tags=24%, list=19%, signal=29%
WikiPathways	WP_NUCLEOTIDE_METABOLISM	Nucleotide Metabolism	18	0.3263	0.9009	0.621477	0.779442	1	2363	tags=22%, list=16%, signal=26%
WikiPathways	WP_CALCIUM_REGULATION_IN_CARDIAC_CELLS	Calcium Regulation In Cardiac Cells	94	0.2386	0.9009	0.659453	0.777431	1	3230	tags=27%, list=22%, signal=34%
WikiPathways	WP_UNFOLDED_PROTEIN_RESPONSE	Unfolded Protein Response	23	0.3084	0.9	0.625984	0.776952	1	864	tags=17%, list=6%, signal=18%
Reactome	REACTOME_TRAFFICKING_OF_AMPA_RECEPTORS	Trafficking Of Ampa Receptors	19	0.3145	0.8997	0.61057	0.76881	1	2962	tags=42%, list=20%, signal=53%
WikiPathways	WP_GENETIC_CAUSES_OF_PORTOSINUSOIDAL_VASCULAR_DISEASE	Genetic Causes Of Portosinusoidal Vascular Disease	27	0.2985	0.899	0.629353	0.776738	1	1144	tags=15%, list=8%, signal=16%
Reactome	REACTOME_NOTCH_HLH_TRANSCRIPTION_PATHWAY	Notch Hlh Transcription Pathway	25	0.3005	0.8984	0.609314	0.770289	1	2938	tags=24%, list=20%, signal=30%
WikiPathways	WP_KALLMANN_SYNDROME	Kallmann Syndrome	16	0.321	0.8984	0.615942	0.775831	1	4975	tags=56%, list=34%, signal=85%
WikiPathways	WP_RAS_SIGNALING	Ras Signaling	128	0.2293	0.8966	0.694206	0.776879	1	2667	tags=21%, list=18%, signal=26%
Reactome	REACTOME_SIGNALING_BY_TGF_BETA_RECEPTOR_COMPLEX	Signaling By Tgf Beta Receptor Complex	90	0.24	0.8959	0.676149	0.773964	1	1778	tags=17%, list=12%, signal=19%
WikiPathways	WP_OVARIAN_INFERTILITY	Ovarian Infertility	24	0.2992	0.8956	0.602122	0.776761	1	3087	tags=29%, list=21%, signal=37%
WikiPathways	WP_PHYSIOLOGICAL_AND_PATHOLOGICAL_HYPERTROPHY_OF_THE_HEART	Physiological And Pathological Hypertrophy Of The Heart	22	0.3034	0.8947	0.61642	0.776278	1	2905	tags=27%, list=20%, signal=34%
WikiPathways	WP_AUTOPHAGY	Autophagy	29	0.2881	0.8939	0.625473	0.77561	1	3935	tags=31%, list=27%, signal=42%
Reactome	REACTOME_LISTERIA_MONOCYTOGENES_ENTRY_INTO_HOST_CELLS	Listeria Monocytogenes Entry Into Host Cells	18	0.3128	0.8936	0.638656	0.777153	1	3127	tags=33%, list=21%, signal=42%
Reactome	REACTOME_G_ALPHA_Q_SIGNALLING_EVENTS	G Alpha Q Signalling Events	93	0.236	0.8935	0.678337	0.776203	1	2458	tags=23%, list=17%, signal=27%
WikiPathways	WP_DNA_REPAIR_PATHWAYS_FULL_NETWORK	Dna Repair Pathways Full Network	116	0.2299	0.8934	0.696872	0.774605	1	3465	tags=22%, list=23%, signal=28%
Reactome	REACTOME_TRANSCRIPTIONAL_REGULATION_BY_NPAS4	Transcriptional Regulation By Npas4	27	0.29	0.8905	0.62963	0.780682	1	1534	tags=19%, list=10%, signal=21%
WikiPathways	WP_TGFBETA_SIGNALING_IN_THYROID_CELLS_FOR_EPITHELIALMESENCHYMAL_TRANSITION	Tgfbeta Signaling In Thyroid Cells For Epithelialmesenchymal Transition	16	0.3355	0.8903	0.614286	0.778265	1	1122	tags=25%, list=8%, signal=27%
WikiPathways	WP_SPHINGOLIPID_METABOLISM_OVERVIEW	Sphingolipid Metabolism Overview	23	0.302	0.8902	0.626866	0.776415	1	4353	tags=43%, list=30%, signal=62%
Reactome	REACTOME_DISEASES_OF_MITOTIC_CELL_CYCLE	Diseases Of Mitotic Cell Cycle	36	0.2738	0.8901	0.638677	0.780351	1	3087	tags=25%, list=21%, signal=32%
Reactome	REACTOME_VEGFR2_MEDIATED_CELL_PROLIFERATION	Vegfr2 Mediated Cell Proliferation	18	0.3198	0.89	0.612551	0.779353	1	2626	tags=28%, list=18%, signal=34%
WikiPathways	WP_SYNAPTIC_SIGNALING_ASSOCIATED_WITH_AUTISM_SPECTRUM_DISORDER	Synaptic Signaling Associated With Autism Spectrum Disorder	35	0.2748	0.8893	0.644703	0.77595	1	2793	tags=26%, list=19%, signal=32%
WikiPathways	WP_3Q29_COPY_NUMBER_VARIATION_SYNDROME	3Q29 Copy Number Variation Syndrome	56	0.2498	0.8888	0.657988	0.774708	1	1258	tags=14%, list=9%, signal=16%
Reactome	REACTOME_MRNA_3_END_PROCESSING	Mrna 3 End Processing	147	0.2263	0.8884	0.722105	0.781094	1	2799	tags=20%, list=19%, signal=25%
WikiPathways	WP_SODIUM_CHANNEL_IN_EPILEPSY	Sodium Channel In Epilepsy	22	0.3119	0.8884	0.632063	0.773504	1	672	tags=14%, list=5%, signal=14%
Reactome	REACTOME_RAF_ACTIVATION	Raf Activation	30	0.2818	0.8856	0.644005	0.785047	1	2395	tags=23%, list=16%, signal=28%
WikiPathways	WP_DNA_DAMAGE_RESPONSE	Dna Damage Response	60	0.249	0.8855	0.645274	0.776661	1	3607	tags=27%, list=24%, signal=35%
Reactome	REACTOME_SIGNALING_BY_EGFR	Signaling By Egfr	42	0.2662	0.8853	0.648485	0.784479	1	3127	tags=26%, list=21%, signal=33%
WikiPathways	WP_NANOMATERIAL_INDUCED_APOPTOSIS	Nanomaterial Induced Apoptosis	17	0.3219	0.8841	0.649526	0.777009	1	5786	tags=65%, list=39%, signal=106%
Reactome	REACTOME_NOTCH2_ACTIVATION_AND_TRANSMISSION_OF_SIGNAL_TO_THE_NUCLEUS	Notch2 Activation And Transmission Of Signal To The Nucleus	21	0.3067	0.8831	0.639344	0.787578	1	3419	tags=43%, list=23%, signal=56%
Reactome	REACTOME_RHOBTB2_GTPASE_CYCLE	Rhobtb2 Gtpase Cycle	22	0.3045	0.8824	0.622795	0.787713	1	3478	tags=27%, list=24%, signal=36%
Reactome	REACTOME_RHOH_GTPASE_CYCLE	Rhoh Gtpase Cycle	31	0.2804	0.8815	0.664499	0.788066	1	3001	tags=32%, list=20%, signal=40%
Reactome	REACTOME_ADP_SIGNALLING_THROUGH_P2Y_PURINOCEPTOR_1	Adp Signalling Through P2Y Purinoceptor 1	16	0.3198	0.8813	0.657554	0.787363	1	1131	tags=19%, list=8%, signal=20%
WikiPathways	WP_SPHINGOLIPID_METABOLISM_IN_SENESCENCE	Sphingolipid Metabolism In Senescence	24	0.289	0.8809	0.637978	0.780942	1	3087	tags=29%, list=21%, signal=37%
Reactome	REACTOME_ONCOGENE_INDUCED_SENESCENCE	Oncogene Induced Senescence	33	0.273	0.8808	0.637419	0.787158	1	3127	tags=27%, list=21%, signal=35%
Reactome	REACTOME_G_BETA_GAMMA_SIGNALLING_THROUGH_PI3KGAMMA	G Beta Gamma Signalling Through Pi3Kgamma	15	0.3247	0.88	0.633103	0.787682	1	1131	tags=20%, list=8%, signal=22%
WikiPathways	WP_THYROID_STIMULATING_HORMONE_TSH_SIGNALING	Thyroid Stimulating Hormone Tsh Signaling	60	0.2471	0.8798	0.669336	0.780884	1	2408	tags=22%, list=16%, signal=26%
WikiPathways	WP_AMINO_ACID_METABOLISM	Amino Acid Metabolism	67	0.2474	0.8791	0.67853	0.780228	1	3102	tags=21%, list=21%, signal=26%
WikiPathways	WP_GLYCOSYLPHOSPHATIDYL_INOSITOL_ANCHOR_PATHWAY	Glycosylphosphatidyl Inositol Anchor Pathway	24	0.2906	0.8791	0.645638	0.778194	1	5692	tags=54%, list=39%, signal=88%
WikiPathways	WP_TH17_CELL_DIFFERENTIATION_PATHWAY	Th17 Cell Differentiation Pathway	42	0.2605	0.8761	0.659008	0.781651	1	1796	tags=17%, list=12%, signal=19%
Reactome	REACTOME_G_PROTEIN_MEDIATED_EVENTS	G Protein Mediated Events	41	0.2661	0.8758	0.66582	0.794259	1	2830	tags=24%, list=19%, signal=30%
WikiPathways	WP_AMPK_REGULATION_OF_MAMMARY_MILK_PROTEIN_SYNTHESIS	Ampk Regulation Of Mammary Milk Protein Synthesis	16	0.3199	0.8755	0.640054	0.780709	1	2635	tags=25%, list=18%, signal=30%
WikiPathways	WP_TYPE_I_COLLAGEN_SYNTHESIS_IN_THE_CONTEXT_OF_OSTEOGENESIS_IMPERFECTA	Type I Collagen Synthesis In The Context Of Osteogenesis Imperfecta	23	0.2971	0.8731	0.649076	0.782881	1	4374	tags=39%, list=30%, signal=56%
Reactome	REACTOME_METABOLISM_OF_NITRIC_OXIDE_NOS3_ACTIVATION_AND_REGULATION	Metabolism Of Nitric Oxide Nos3 Activation And Regulation	15	0.3254	0.8717	0.661406	0.80059	1	3644	tags=33%, list=25%, signal=44%
Reactome	REACTOME_TRANSCRIPTION_OF_E2F_TARGETS_UNDER_NEGATIVE_CONTROL_BY_P107_RBL1_AND_P130_RBL2_IN_COMPLEX_WITH_HDAC1	Transcription Of E2F Targets Under Negative Control By P107 Rbl1 And P130 Rbl2 In Complex With Hdac1	16	0.3188	0.8716	0.639946	0.799586	1	2408	tags=25%, list=16%, signal=30%
Reactome	REACTOME_SIGNALING_BY_NOTCH1_PEST_DOMAIN_MUTANTS_IN_CANCER	Signaling By Notch1 Pest Domain Mutants In Cancer	52	0.2507	0.8705	0.686321	0.800359	1	3419	tags=27%, list=23%, signal=35%
Reactome	REACTOME_DOWNREGULATION_OF_SMAD2_3_SMAD4_TRANSCRIPTIONAL_ACTIVITY	Downregulation Of Smad2 3 Smad4 Transcriptional Activity	30	0.2718	0.8704	0.659767	0.79939	1	3127	tags=23%, list=21%, signal=30%
Reactome	REACTOME_SIGNALING_BY_ERBB2_IN_CANCER	Signaling By Erbb2 In Cancer	21	0.2982	0.87	0.655629	0.798899	1	1916	tags=24%, list=13%, signal=27%
Reactome	REACTOME_EPHB_MEDIATED_FORWARD_SIGNALING	Ephb Mediated Forward Signaling	38	0.2655	0.8693	0.65404	0.799184	1	4987	tags=45%, list=34%, signal=67%
Reactome	REACTOME_ATP_DEPENDENT_CHROMATIN_REMODELERS	Atp Dependent Chromatin Remodelers	26	0.2853	0.8667	0.656697	0.80283	1	2125	tags=19%, list=14%, signal=22%
Reactome	REACTOME_N_GLYCAN_TRIMMING_IN_THE_ER_AND_CALNEXIN_CALRETICULIN_CYCLE	N Glycan Trimming In The Er And Calnexin Calreticulin Cycle	34	0.2689	0.8665	0.681141	0.802101	1	3127	tags=29%, list=21%, signal=37%
Reactome	REACTOME_STING_MEDIATED_INDUCTION_OF_HOST_IMMUNE_RESPONSES	Sting Mediated Induction Of Host Immune Responses	15	0.3198	0.8656	0.643478	0.802543	1	4613	tags=47%, list=31%, signal=68%
Reactome	REACTOME_MUSCLE_CONTRACTION	Muscle Contraction	97	0.2308	0.8645	0.732749	0.803439	1	3717	tags=31%, list=25%, signal=41%
Reactome	REACTOME_REGULATION_OF_HSF1_MEDIATED_HEAT_SHOCK_RESPONSE	Regulation Of Hsf1 Mediated Heat Shock Response	73	0.2379	0.8641	0.702517	0.80296	1	3985	tags=26%, list=27%, signal=35%
Reactome	REACTOME_SIGNALING_BY_NOTCH3	Signaling By Notch3	39	0.262	0.8621	0.683636	0.805461	1	3419	tags=36%, list=23%, signal=47%
WikiPathways	WP_OLIGODENDROCYTE_SPECIFICATION_AND_DIFFERENTIATION_LEADING_TO_MYELIN_COMPONENTS_FOR_CNS	Oligodendrocyte Specification And Differentiation Leading To Myelin Components For Cns	18	0.3102	0.8607	0.668947	0.802248	1	3799	tags=44%, list=26%, signal=60%
Reactome	REACTOME_SIGNALING_BY_FGFR4	Signaling By Fgfr4	29	0.2762	0.8595	0.661458	0.80891	1	3127	tags=31%, list=21%, signal=39%
WikiPathways	WP_PRIMARY_OVARIAN_INSUFFICIENCY	Primary Ovarian Insufficiency	94	0.2268	0.8582	0.723872	0.804576	1	4539	tags=32%, list=31%, signal=46%
WikiPathways	WP_SPHINGOLIPID_METABOLISM_INTEGRATED_PATHWAY	Sphingolipid Metabolism Integrated Pathway	23	0.284	0.8579	0.677686	0.802853	1	4353	tags=39%, list=30%, signal=55%
WikiPathways	WP_DNA_IRDOUBLE_STRAND_BREAKS_AND_CELLULAR_RESPONSE_VIA_ATM	Dna Irdouble Strand Breaks And Cellular Response Via Atm	52	0.2512	0.8557	0.728691	0.804689	1	3342	tags=25%, list=23%, signal=32%
WikiPathways	WP_MIRNAS_INVOLVED_IN_DNA_DAMAGE_RESPONSE	Mirnas Involved In Dna Damage Response	15	0.3142	0.8542	0.679943	0.805306	1	4152	tags=40%, list=28%, signal=56%
Reactome	REACTOME_SIGNALING_BY_FGFR2_IN_DISEASE	Signaling By Fgfr2 In Disease	29	0.2789	0.8542	0.674572	0.817059	1	2799	tags=31%, list=19%, signal=38%
Reactome	REACTOME_MRNA_POLYADENYLATION	Mrna Polyadenylation	124	0.2183	0.8538	0.754818	0.816676	1	3127	tags=22%, list=21%, signal=27%
Reactome	REACTOME_NICOTINATE_METABOLISM	Nicotinate Metabolism	21	0.2986	0.8537	0.695122	0.815692	1	6024	tags=52%, list=41%, signal=88%
Reactome	REACTOME_TRANSCRIPTIONAL_REGULATION_OF_WHITE_ADIPOCYTE_DIFFERENTIATION	Transcriptional Regulation Of White Adipocyte Differentiation	68	0.2338	0.8526	0.710762	0.816431	1	4292	tags=34%, list=29%, signal=47%
WikiPathways	WP_HIPPOYAP_SIGNALING	Hippoyap Signaling	20	0.2975	0.8511	0.675272	0.8087	1	3581	tags=40%, list=24%, signal=53%
Reactome	REACTOME_INITIATION_OF_NUCLEAR_ENVELOPE_NE_REFORMATION	Initiation Of Nuclear Envelope Ne Reformation	19	0.3019	0.8502	0.675676	0.819454	1	2081	tags=26%, list=14%, signal=31%
Reactome	REACTOME_BUTYRATE_RESPONSE_FACTOR_1_BRF1_BINDS_AND_DESTABILIZES_MRNA	Butyrate Response Factor 1 Brf1 Binds And Destabilizes Mrna	17	0.3083	0.8484	0.692414	0.821461	1	2669	tags=24%, list=18%, signal=29%
Reactome	REACTOME_RHO_GTPASES_ACTIVATE_FORMINS	Rho Gtpases Activate Formins	125	0.2173	0.8475	0.774725	0.821778	1	3574	tags=26%, list=24%, signal=33%
WikiPathways	WP_FAS_LIGAND_PATHWAY_AND_STRESS_INDUCTION_OF_HEAT_SHOCK_PROTEINS	Fas Ligand Pathway And Stress Induction Of Heat Shock Proteins	39	0.2586	0.8446	0.69863	0.817393	1	2144	tags=18%, list=15%, signal=21%
WikiPathways	WP_GABA_AND_GLUTAMATE_SIGNALLING_IN_EPILEPTOGENESIS	Gaba And Glutamate Signalling In Epileptogenesis	63	0.2355	0.842	0.720329	0.819439	1	1099	tags=14%, list=7%, signal=15%
WikiPathways	WP_PREIMPLANTATION_EMBRYO	Preimplantation Embryo	26	0.2712	0.8419	0.681234	0.817534	1	248	tags=12%, list=2%, signal=12%
Reactome	REACTOME_RHOG_GTPASE_CYCLE	Rhog Gtpase Cycle	68	0.2289	0.8405	0.717416	0.832658	1	4562	tags=35%, list=31%, signal=51%
Reactome	REACTOME_TGF_BETA_RECEPTOR_SIGNALING_IN_EMT_EPITHELIAL_TO_MESENCHYMAL_TRANSITION	Tgf Beta Receptor Signaling In Emt Epithelial To Mesenchymal Transition	15	0.3097	0.8402	0.68088	0.832041	1	3127	tags=33%, list=21%, signal=42%
Reactome	REACTOME_TRANSCRIPTIONAL_REGULATION_BY_VENTX	Transcriptional Regulation By Ventx	35	0.2628	0.84	0.714286	0.831142	1	5302	tags=43%, list=36%, signal=67%
Reactome	REACTOME_MITOCHONDRIAL_TRNA_AMINOACYLATION	Mitochondrial Trna Aminoacylation	21	0.2922	0.8398	0.690934	0.830321	1	4077	tags=33%, list=28%, signal=46%
Reactome	REACTOME_TRANSCRIPTIONAL_AND_POST_TRANSLATIONAL_REGULATION_OF_MITF_M_EXPRESSION_AND_ACTIVITY	Transcriptional And Post Translational Regulation Of Mitf M Expression And Activity	48	0.2473	0.8387	0.726835	0.831131	1	749	tags=13%, list=5%, signal=13%
WikiPathways	WP_MIRTARGETED_GENES_IN_MUSCLE_CELL	Mirtargeted Genes In Muscle Cell	299	0.2034	0.8369	0.869433	0.823724	1	3067	tags=20%, list=21%, signal=25%
Reactome	REACTOME_SYNTHESIS_OF_ACTIVE_UBIQUITIN_ROLES_OF_E1_AND_E2_ENZYMES	Synthesis Of Active Ubiquitin Roles Of E1 And E2 Enzymes	30	0.2733	0.8367	0.72375	0.833351	1	3127	tags=23%, list=21%, signal=30%
Reactome	REACTOME_NON_INTEGRIN_MEMBRANE_ECM_INTERACTIONS	Non Integrin Membrane Ecm Interactions	58	0.2401	0.8363	0.738979	0.832858	1	4172	tags=36%, list=28%, signal=50%
Reactome	REACTOME_VASOPRESSIN_REGULATES_RENAL_WATER_HOMEOSTASIS_VIA_AQUAPORINS	Vasopressin Regulates Renal Water Homeostasis Via Aquaporins	26	0.2709	0.8324	0.733422	0.837977	1	2830	tags=23%, list=19%, signal=29%
Reactome	REACTOME_RHO_GTPASE_CYCLE	Rho Gtpase Cycle	373	0.1996	0.8322	0.900702	0.837203	1	3521	tags=25%, list=24%, signal=33%
Reactome	REACTOME_NUCLEAR_SIGNALING_BY_ERBB4	Nuclear Signaling By Erbb4	25	0.2735	0.8283	0.698433	0.842416	1	3419	tags=36%, list=23%, signal=47%
WikiPathways	WP_PDGFRBETA_PATHWAY	Pdgfrbeta Pathway	28	0.2662	0.8269	0.720361	0.83773	1	1333	tags=18%, list=9%, signal=20%
Reactome	REACTOME_CREB1_PHOSPHORYLATION_THROUGH_NMDA_RECEPTOR_MEDIATED_ACTIVATION_OF_RAS_SIGNALING	Creb1 Phosphorylation Through Nmda Receptor Mediated Activation Of Ras Signaling	19	0.2937	0.8234	0.708609	0.849175	1	1288	tags=16%, list=9%, signal=17%
WikiPathways	WP_GLYCOGEN_SYNTHESIS_AND_DEGRADATION	Glycogen Synthesis And Degradation	35	0.2517	0.8229	0.729798	0.841863	1	2667	tags=26%, list=18%, signal=31%
Reactome	REACTOME_FCGAMMA_RECEPTOR_FCGR_DEPENDENT_PHAGOCYTOSIS	Fcgamma Receptor Fcgr Dependent Phagocytosis	74	0.2266	0.8223	0.7687	0.849825	1	4763	tags=39%, list=32%, signal=58%
WikiPathways	WP_SLC25A46_PATHWAY	Slc25A46 Pathway	20	0.2853	0.8221	0.712551	0.841081	1	4692	tags=35%, list=32%, signal=51%
WikiPathways	WP_MAMMARY_GLAND_DEVELOPMENT_PREGNANCY_AND_LACTATION_STAGE_3_OF_4	Mammary Gland Development Pregnancy And Lactation Stage 3 Of 4	33	0.2562	0.8213	0.726027	0.84035	1	3288	tags=30%, list=22%, signal=39%
Reactome	REACTOME_NEGATIVE_REGULATION_OF_FGFR2_SIGNALING	Negative Regulation Of Fgfr2 Signaling	21	0.2837	0.8212	0.723097	0.850456	1	3127	tags=33%, list=21%, signal=42%
Reactome	REACTOME_SIGNALING_BY_FGFR2	Signaling By Fgfr2	55	0.2336	0.8211	0.748815	0.849575	1	3127	tags=31%, list=21%, signal=39%
Reactome	REACTOME_SHC1_EVENTS_IN_ERBB2_SIGNALING	Shc1 Events In Erbb2 Signaling	17	0.2962	0.821	0.702398	0.848597	1	1916	tags=24%, list=13%, signal=27%
WikiPathways	WP_ANDROGEN_RECEPTOR_NETWORK_IN_PROSTATE_CANCER	Androgen Receptor Network In Prostate Cancer	97	0.2144	0.8154	0.793668	0.847405	1	3256	tags=23%, list=22%, signal=29%
Reactome	REACTOME_ACTIVATION_OF_THE_PRE_REPLICATIVE_COMPLEX	Activation Of The Pre Replicative Complex	32	0.2564	0.8133	0.751282	0.859635	1	5726	tags=53%, list=39%, signal=87%
WikiPathways	WP_ANGIOGENESIS	Angiogenesis	22	0.2754	0.8133	0.72846	0.848521	1	1763	tags=18%, list=12%, signal=21%
WikiPathways	WP_HAIR_FOLLICLE_DEVELOPMENT_ORGANOGENESIS_STAGE_2_OF_3	Hair Follicle Development Organogenesis Stage 2 Of 3	22	0.2731	0.8099	0.732337	0.851661	1	2929	tags=32%, list=20%, signal=40%
Reactome	REACTOME_OPIOID_SIGNALLING	Opioid Signalling	65	0.2227	0.8097	0.801624	0.864199	1	2830	tags=22%, list=19%, signal=27%
WikiPathways	WP_HOSTPATHOGEN_INTERACTION_OF_HUMAN_CORONAVIRUSES_AUTOPHAGY	Hostpathogen Interaction Of Human Coronaviruses Autophagy	18	0.2842	0.809	0.749648	0.850811	1	6002	tags=50%, list=41%, signal=84%
WikiPathways	WP_PI3KAKTMTOR_SIGNALING_AND_THERAPEUTIC_OPPORTUNITIES_IN_PROSTATE_CANCER	Pi3Kaktmtor Signaling And Therapeutic Opportunities In Prostate Cancer	28	0.2613	0.8087	0.738562	0.849215	1	1957	tags=21%, list=13%, signal=25%
WikiPathways	WP_THYROXINE_THYROID_HORMONE_PRODUCTION	Thyroxine Thyroid Hormone Production	16	0.2953	0.8084	0.736695	0.847685	1	2498	tags=25%, list=17%, signal=30%
Reactome	REACTOME_SIGNALING_BY_NOTCH1	Signaling By Notch1	64	0.2279	0.8078	0.786127	0.86591	1	3419	tags=27%, list=23%, signal=34%
Reactome	REACTOME_SARS_COV_2_ACTIVATES_MODULATES_INNATE_AND_ADAPTIVE_IMMUNE_RESPONSES	Sars Cov 2 Activates Modulates Innate And Adaptive Immune Responses	90	0.2152	0.8073	0.80786	0.865586	1	2455	tags=14%, list=17%, signal=17%
WikiPathways	WP_TYPE_I_INTERFERON_INDUCTION_AND_SIGNALING_DURING_SARSCOV2_INFECTION	Type I Interferon Induction And Signaling During Sarscov2 Infection	23	0.2723	0.8059	0.721774	0.849246	1	1167	tags=13%, list=8%, signal=14%
Reactome	REACTOME_SIGNALING_BY_ALK_IN_CANCER	Signaling By Alk In Cancer	83	0.2147	0.7992	0.81989	0.876868	1	3127	tags=20%, list=21%, signal=26%
WikiPathways	WP_G_PROTEIN_SIGNALING	G Protein Signaling	68	0.2212	0.7989	0.80787	0.857643	1	2830	tags=19%, list=19%, signal=24%
WikiPathways	WP_GLIOBLASTOMA_SIGNALING	Glioblastoma Signaling	74	0.2157	0.7983	0.805299	0.856535	1	2819	tags=23%, list=19%, signal=28%
WikiPathways	WP_AFFECTED_PATHWAYS_IN_DUCHENNE_MUSCULAR_DYSTROPHY	Affected Pathways In Duchenne Muscular Dystrophy	47	0.2324	0.798	0.786408	0.854905	1	2354	tags=17%, list=16%, signal=20%
Reactome	REACTOME_FORMATION_OF_THE_POLYBROMO_BAF_PBAF_COMPLEX	Formation Of The Polybromo Baf Pbaf Complex	17	0.2845	0.7963	0.733142	0.879955	1	1909	tags=18%, list=13%, signal=20%
Reactome	REACTOME_REGULATION_OF_EXPRESSION_AND_FUNCTION_OF_TYPE_II_CLASSICAL_CADHERINS	Regulation Of Expression And Function Of Type Ii Classical Cadherins	23	0.2678	0.7959	0.765957	0.87932	1	972	tags=13%, list=7%, signal=14%
Reactome	REACTOME_INTEGRATION_OF_ENERGY_METABOLISM	Integration Of Energy Metabolism	74	0.2166	0.7946	0.823395	0.879912	1	2436	tags=19%, list=17%, signal=23%
WikiPathways	WP_G13_SIGNALING	G13 Signaling	34	0.2444	0.7942	0.769923	0.858408	1	2883	tags=24%, list=20%, signal=29%
Reactome	REACTOME_NOTCH1_INTRACELLULAR_DOMAIN_REGULATES_TRANSCRIPTION	Notch1 Intracellular Domain Regulates Transcription	45	0.2369	0.7939	0.790361	0.879816	1	3127	tags=22%, list=21%, signal=28%
WikiPathways	WP_TCA_CYCLE_AND_DEFICIENCY_OF_PYRUVATE_DEHYDROGENASE_COMPLEX_PDHC	Tca Cycle And Deficiency Of Pyruvate Dehydrogenase Complex Pdhc	15	0.2977	0.7934	0.749284	0.857523	1	275	tags=7%, list=2%, signal=7%
Reactome	REACTOME_DISORDERS_OF_DEVELOPMENTAL_BIOLOGY	Disorders Of Developmental Biology	18	0.2849	0.7932	0.767596	0.879666	1	935	tags=11%, list=6%, signal=12%
Reactome	REACTOME_BMAL1_CLOCK_NPAS2_ACTIVATES_CIRCADIAN_EXPRESSION	Bmal1 Clock Npas2 Activates Circadian Expression	21	0.2792	0.7925	0.743555	0.879513	1	1525	tags=14%, list=10%, signal=16%
Reactome	REACTOME_GABA_B_RECEPTOR_ACTIVATION	Gaba B Receptor Activation	22	0.2744	0.7921	0.761905	0.878973	1	2830	tags=27%, list=19%, signal=34%
WikiPathways	WP_ENVELOPE_PROTEINS_AND_THEIR_POTENTIAL_ROLES_IN_EDMD_PHYSIOPATHOLOGY	Envelope Proteins And Their Potential Roles In Edmd Physiopathology	39	0.2402	0.7894	0.762315	0.861445	1	2883	tags=26%, list=20%, signal=32%
WikiPathways	WP_RENINANGIOTENSINALDOSTERONE_SYSTEM_RAAS	Reninangiotensinaldosterone System Raas	24	0.2639	0.7884	0.771622	0.860782	1	2905	tags=25%, list=20%, signal=31%
WikiPathways	WP_MIRTARGETED_GENES_IN_SQUAMOUS_CELL	Mirtargeted Genes In Squamous Cell	115	0.2034	0.788	0.863974	0.859184	1	3552	tags=23%, list=24%, signal=31%
WikiPathways	WP_INFLAMMATORY_BOWEL_DISEASE_SIGNALING	Inflammatory Bowel Disease Signaling	18	0.2808	0.7877	0.744186	0.857626	1	4270	tags=33%, list=29%, signal=47%
Reactome	REACTOME_PROCESSING_OF_CAPPED_INTRONLESS_PRE_MRNA	Processing Of Capped Intronless Pre Mrna	29	0.2484	0.7869	0.774648	0.885185	1	2786	tags=17%, list=19%, signal=21%
Reactome	REACTOME_AQUAPORIN_MEDIATED_TRANSPORT	Aquaporin Mediated Transport	27	0.2564	0.7849	0.77356	0.886859	1	3369	tags=26%, list=23%, signal=34%
Reactome	REACTOME_SIGNALING_BY_BRAF_AND_RAF1_FUSIONS	Signaling By Braf And Raf1 Fusions	54	0.2224	0.7826	0.813981	0.888847	1	1327	tags=13%, list=9%, signal=14%
WikiPathways	WP_AUTOPHAGY_IN_PANCREATIC_DUCTAL_ADENOCARCINOMA	Autophagy In Pancreatic Ductal Adenocarcinoma	17	0.2808	0.782	0.74116	0.863653	1	1971	tags=18%, list=13%, signal=20%
Reactome	REACTOME_TRANSCRIPTIONAL_ACTIVITY_OF_SMAD2_SMAD3_SMAD4_HETEROTRIMER	Transcriptional Activity Of Smad2 Smad3 Smad4 Heterotrimer	49	0.2259	0.7812	0.821472	0.8896	1	1778	tags=14%, list=12%, signal=16%
WikiPathways	WP_KCNQ2_AND_KCNQ3RELATED_EPILEPSY	Kcnq2 And Kcnq3Related Epilepsy	25	0.261	0.7807	0.764	0.863374	1	3205	tags=24%, list=22%, signal=31%
Reactome	REACTOME_POTENTIAL_THERAPEUTICS_FOR_SARS	Potential Therapeutics For Sars	75	0.2128	0.7766	0.825942	0.895007	1	2267	tags=16%, list=15%, signal=19%
Reactome	REACTOME_TRISTETRAPROLIN_TTP_ZFP36_BINDS_AND_DESTABILIZES_MRNA	Tristetraprolin Ttp Zfp36 Binds And Destabilizes Mrna	17	0.2858	0.7764	0.78739	0.894063	1	4287	tags=35%, list=29%, signal=50%
Reactome	REACTOME_TRANSPORT_OF_MATURE_TRANSCRIPT_TO_CYTOPLASM	Transport Of Mature Transcript To Cytoplasm	79	0.2093	0.7745	0.833523	0.895337	1	2786	tags=16%, list=19%, signal=20%
Reactome	REACTOME_EPHRIN_SIGNALING	Ephrin Signaling	17	0.2805	0.7729	0.784571	0.896232	1	3149	tags=35%, list=21%, signal=45%
Reactome	REACTOME_ABERRANT_REGULATION_OF_MITOTIC_EXIT_IN_CANCER_DUE_TO_RB1_DEFECTS	Aberrant Regulation Of Mitotic Exit In Cancer Due To Rb1 Defects	20	0.2709	0.7722	0.775623	0.895873	1	5302	tags=45%, list=36%, signal=70%
Reactome	REACTOME_TRIGLYCERIDE_METABOLISM	Triglyceride Metabolism	21	0.265	0.7709	0.789688	0.896578	1	1574	tags=19%, list=11%, signal=21%
WikiPathways	WP_INTERFERON_SIGNALING_IN_TUBERCULOSIS	Interferon Signaling In Tuberculosis	19	0.2708	0.7709	0.785034	0.874786	1	1167	tags=16%, list=8%, signal=17%
Reactome	REACTOME_VXPX_CARGO_TARGETING_TO_CILIUM	Vxpx Cargo Targeting To Cilium	16	0.2801	0.7692	0.787466	0.897615	1	4195	tags=31%, list=28%, signal=44%
Reactome	REACTOME_DAG_AND_IP3_SIGNALING	Dag And Ip3 Signaling	31	0.241	0.7657	0.808429	0.901131	1	2122	tags=19%, list=14%, signal=23%
Reactome	REACTOME_INOSITOL_PHOSPHATE_METABOLISM	Inositol Phosphate Metabolism	39	0.2321	0.7602	0.821561	0.907227	1	3036	tags=23%, list=21%, signal=29%
Reactome	REACTOME_INACTIVATION_OF_CSF3_G_CSF_SIGNALING	Inactivation Of Csf3 G Csf Signaling	21	0.2604	0.7584	0.808599	0.908227	1	5185	tags=43%, list=35%, signal=66%
WikiPathways	WP_ANGIOTENSIN_II_RECEPTOR_TYPE_1_PATHWAY	Angiotensin Ii Receptor Type 1 Pathway	23	0.2579	0.758	0.797279	0.889948	1	84	tags=9%, list=1%, signal=9%
WikiPathways	WP_PURINE_METABOLISM_AND_RELATED_DISORDERS	Purine Metabolism And Related Disorders	19	0.2668	0.7542	0.784044	0.892754	1	3816	tags=32%, list=26%, signal=43%
WikiPathways	WP_TYPE_II_INTERFERON_SIGNALING	Type Ii Interferon Signaling	21	0.2547	0.7538	0.79473	0.891062	1	1067	tags=14%, list=7%, signal=15%
WikiPathways	WP_GNAQ_PATHWAYS_IN_PORTWINE_STAIN	Gnaq Pathways In Portwine Stain	21	0.256	0.7492	0.813953	0.894665	1	1852	tags=19%, list=13%, signal=22%
Reactome	REACTOME_INTRA_GOLGI_TRAFFIC	Intra Golgi Traffic	40	0.2277	0.7482	0.856793	0.919647	1	4690	tags=33%, list=32%, signal=48%
WikiPathways	WP_ETHANOL_EFFECTS_ON_HISTONE_MODIFICATIONS	Ethanol Effects On Histone Modifications	23	0.2526	0.7469	0.813673	0.895529	1	5014	tags=39%, list=34%, signal=59%
WikiPathways	WP_HEPATOCYTE_GROWTH_FACTOR_RECEPTOR_SIGNALING	Hepatocyte Growth Factor Receptor Signaling	32	0.2349	0.7423	0.868766	0.899137	1	4422	tags=34%, list=30%, signal=49%
WikiPathways	WP_IMATINIB_AND_CHRONIC_MYELOID_LEUKEMIA	Imatinib And Chronic Myeloid Leukemia	18	0.2653	0.7412	0.821577	0.898477	1	3607	tags=33%, list=24%, signal=44%
Reactome	REACTOME_PKA_MEDIATED_PHOSPHORYLATION_OF_CREB	Pka Mediated Phosphorylation Of Creb	15	0.2779	0.7378	0.825702	0.931185	1	2830	tags=27%, list=19%, signal=33%
Reactome	REACTOME_FLT3_SIGNALING_IN_DISEASE	Flt3 Signaling In Disease	25	0.2468	0.7375	0.85259	0.930301	1	3180	tags=28%, list=22%, signal=36%
Reactome	REACTOME_SUMOYLATION	Sumoylation	171	0.1839	0.7365	0.943809	0.930223	1	2846	tags=17%, list=19%, signal=21%
WikiPathways	WP_MRNA_PROCESSING	Mrna Processing	118	0.1893	0.7358	0.903846	0.902772	1	2747	tags=17%, list=19%, signal=21%
Reactome	REACTOME_TRNA_AMINOACYLATION	Trna Aminoacylation	40	0.2208	0.7349	0.843088	0.930871	1	4077	tags=28%, list=28%, signal=38%
Reactome	REACTOME_PHASE_0_RAPID_DEPOLARISATION	Phase 0 Rapid Depolarisation	15	0.2728	0.7331	0.821006	0.931874	1	3684	tags=33%, list=25%, signal=44%
Reactome	REACTOME_G1_S_SPECIFIC_TRANSCRIPTION	G1 S Specific Transcription	28	0.2411	0.7317	0.856218	0.932287	1	3922	tags=29%, list=27%, signal=39%
WikiPathways	WP_NOTCH_SIGNALING_WP61	Notch Signaling Wp61	50	0.2109	0.7286	0.873072	0.909183	1	3419	tags=22%, list=23%, signal=29%
WikiPathways	WP_ANGIOGENESIS_OVERVIEW	Angiogenesis Overview	55	0.2081	0.7274	0.883413	0.908536	1	2703	tags=20%, list=18%, signal=24%
Reactome	REACTOME_FORMATION_OF_INCISION_COMPLEX_IN_GG_NER	Formation Of Incision Complex In Gg Ner	41	0.2179	0.7257	0.873257	0.93811	1	5855	tags=39%, list=40%, signal=65%
WikiPathways	WP_EICOSANOID_METABOLISM_VIA_LIPOOXYGENASES_LOX	Eicosanoid Metabolism Via Lipooxygenases Lox	15	0.2748	0.7252	0.842253	0.908946	1	757	tags=13%, list=5%, signal=14%
Reactome	REACTOME_NUCLEAR_EVENTS_STIMULATED_BY_ALK_SIGNALING_IN_CANCER	Nuclear Events Stimulated By Alk Signaling In Cancer	29	0.2302	0.725	0.844784	0.937673	1	1750	tags=14%, list=12%, signal=16%
Reactome	REACTOME_GLUCAGON_SIGNALING_IN_METABOLIC_REGULATION	Glucagon Signaling In Metabolic Regulation	21	0.2475	0.7247	0.842605	0.936787	1	2830	tags=24%, list=19%, signal=29%
Reactome	REACTOME_TRANSPORT_OF_MATURE_MRNAS_DERIVED_FROM_INTRONLESS_TRANSCRIPTS	Transport Of Mature Mrnas Derived From Intronless Transcripts	43	0.2129	0.7238	0.87715	0.936596	1	2786	tags=16%, list=19%, signal=20%
Reactome	REACTOME_RNA_POLYMERASE_I_TRANSCRIPTION_INITIATION	Rna Polymerase I Transcription Initiation	41	0.2186	0.7197	0.89441	0.939778	1	3034	tags=22%, list=21%, signal=28%
Reactome	REACTOME_DARPP_32_EVENTS	Darpp 32 Events	21	0.2501	0.7182	0.85	0.940117	1	3151	tags=24%, list=21%, signal=30%
Reactome	REACTOME_ADIPOGENESIS	Adipogenesis	85	0.1923	0.717	0.91573	0.940175	1	4934	tags=36%, list=33%, signal=54%
Reactome	REACTOME_REGULATION_OF_TP53_ACTIVITY_THROUGH_ACETYLATION	Regulation Of Tp53 Activity Through Acetylation	27	0.2333	0.7166	0.857143	0.939473	1	4029	tags=30%, list=27%, signal=41%
Reactome	REACTOME_ADRENALINE_NORADRENALINE_INHIBITS_INSULIN_SECRETION	Adrenaline Noradrenaline Inhibits Insulin Secretion	19	0.2565	0.7158	0.848238	0.939211	1	2830	tags=26%, list=19%, signal=33%
WikiPathways	WP_NANOPARTICLE_TRIGGERED_AUTOPHAGIC_CELL_DEATH	Nanoparticle Triggered Autophagic Cell Death	20	0.2518	0.7154	0.842541	0.917672	1	5878	tags=50%, list=40%, signal=83%
Reactome	REACTOME_TRANSLESION_SYNTHESIS_BY_POLK	Translesion Synthesis By Polk	17	0.2539	0.714	0.849108	0.939819	1	3706	tags=29%, list=25%, signal=39%
Reactome	REACTOME_ACTIVATION_OF_ATR_IN_RESPONSE_TO_REPLICATION_STRESS	Activation Of Atr In Response To Replication Stress	35	0.2194	0.7136	0.881013	0.939039	1	4970	tags=31%, list=34%, signal=47%
WikiPathways	WP_MIRNA_REGULATION_OF_DNA_DAMAGE_RESPONSE	Mirna Regulation Of Dna Damage Response	62	0.2023	0.713	0.905963	0.918259	1	3607	tags=24%, list=24%, signal=32%
Reactome	REACTOME_SIGNALING_BY_CSF3_G_CSF	Signaling By Csf3 G Csf	26	0.2333	0.7111	0.879423	0.94047	1	5185	tags=42%, list=35%, signal=65%
Reactome	REACTOME_HEME_SIGNALING	Heme Signaling	39	0.2148	0.706	0.889299	0.944597	1	1525	tags=13%, list=10%, signal=14%
WikiPathways	WP_ONECARBON_METABOLISM	Onecarbon Metabolism	23	0.2379	0.7018	0.874181	0.927767	1	1286	tags=13%, list=9%, signal=14%
WikiPathways	WP_KLEEFSTRA_SYNDROME	Kleefstra Syndrome	26	0.2282	0.7009	0.868957	0.926525	1	4249	tags=31%, list=29%, signal=43%
Reactome	REACTOME_INHIBITION_OF_THE_PROTEOLYTIC_ACTIVITY_OF_APC_C_REQUIRED_FOR_THE_ONSET_OF_ANAPHASE_BY_MITOTIC_SPINDLE_CHECKPOINT_COMPONENTS	Inhibition Of The Proteolytic Activity Of Apc C Required For The Onset Of Anaphase By Mitotic Spindle Checkpoint Components	21	0.2429	0.7002	0.863698	0.949204	1	5302	tags=43%, list=36%, signal=67%
WikiPathways	WP_WNT_SIGNALING_NETPATH	Wnt Signaling Netpath	44	0.208	0.6971	0.905048	0.928454	1	2650	tags=23%, list=18%, signal=28%
WikiPathways	WP_NCRNAS_IN_WNT_SIGNALING_IN_HEPATOCELLULAR_CARCINOMA	Ncrnas In Wnt Signaling In Hepatocellular Carcinoma	53	0.2004	0.6951	0.910693	0.928366	1	2838	tags=19%, list=19%, signal=23%
Reactome	REACTOME_TRANSCRIPTIONAL_REGULATION_BY_THE_AP_2_TFAP2_FAMILY_OF_TRANSCRIPTION_FACTORS	Transcriptional Regulation By The Ap 2 Tfap2 Family Of Transcription Factors	29	0.2209	0.6942	0.88	0.953611	1	1916	tags=17%, list=13%, signal=20%
WikiPathways	WP_REGUCALCIN_IN_PROXIMAL_TUBULE_EPITHELIAL_KIDNEY_CELLS	Regucalcin In Proximal Tubule Epithelial Kidney Cells	22	0.2383	0.6938	0.864939	0.927435	1	1092	tags=14%, list=7%, signal=15%
Reactome	REACTOME_MITOTIC_PROMETAPHASE	Mitotic Prometaphase	186	0.1729	0.6917	0.974039	0.954788	1	3574	tags=23%, list=24%, signal=29%
Reactome	REACTOME_E2F_MEDIATED_REGULATION_OF_DNA_REPLICATION	E2F Mediated Regulation Of Dna Replication	21	0.2342	0.6902	0.870924	0.954915	1	3760	tags=29%, list=25%, signal=38%
WikiPathways	WP_GENES_RELATED_TO_PRIMARY_CILIUM_DEVELOPMENT_BASED_ON_CRISPR	Genes Related To Primary Cilium Development Based On Crispr	99	0.1806	0.6889	0.956715	0.929938	1	3479	tags=19%, list=24%, signal=25%
Reactome	REACTOME_DOWNSTREAM_SIGNAL_TRANSDUCTION	Downstream Signal Transduction	26	0.2249	0.6881	0.87013	0.955603	1	1193	tags=15%, list=8%, signal=17%
Reactome	REACTOME_INTERACTIONS_OF_VPR_WITH_HOST_CELLULAR_PROTEINS	Interactions Of Vpr With Host Cellular Proteins	36	0.2067	0.6797	0.918114	0.961721	1	2019	tags=11%, list=14%, signal=13%
Reactome	REACTOME_NS1_MEDIATED_EFFECTS_ON_HOST_PATHWAYS	Ns1 Mediated Effects On Host Pathways	41	0.2022	0.678	0.916963	0.961853	1	2364	tags=15%, list=16%, signal=17%
WikiPathways	WP_G1_TO_S_CELL_CYCLE_CONTROL	G1 To S Cell Cycle Control	57	0.1928	0.6759	0.932783	0.939531	1	3760	tags=26%, list=25%, signal=35%
WikiPathways	WP_TARGETING_YAP_IN_PANCREATIC_DUCTAL_ADENOCARCINOMA_PDAC	Targeting Yap In Pancreatic Ductal Adenocarcinoma Pdac	23	0.2282	0.67	0.90502	0.942037	1	2869	tags=22%, list=19%, signal=27%
Reactome	REACTOME_PARASITE_INFECTION	Parasite Infection	49	0.1943	0.6683	0.931956	0.968556	1	4763	tags=37%, list=32%, signal=54%
Reactome	REACTOME_TELOMERE_EXTENSION_BY_TELOMERASE	Telomere Extension By Telomerase	20	0.2323	0.6657	0.893297	0.969393	1	1350	tags=15%, list=9%, signal=16%
Reactome	REACTOME_KIDNEY_DEVELOPMENT	Kidney Development	21	0.2276	0.6626	0.91498	0.970476	1	4288	tags=33%, list=29%, signal=47%
Reactome	REACTOME_POSTMITOTIC_NUCLEAR_PORE_COMPLEX_NPC_REFORMATION	Postmitotic Nuclear Pore Complex Npc Reformation	27	0.2152	0.6622	0.91601	0.969621	1	3682	tags=22%, list=25%, signal=30%
Reactome	REACTOME_SUMOYLATION_OF_SUMOYLATION_PROTEINS	Sumoylation Of Sumoylation Proteins	35	0.1981	0.652	0.931931	0.975722	1	2019	tags=11%, list=14%, signal=13%
WikiPathways	WP_JOUBERT_SYNDROME	Joubert Syndrome	68	0.1807	0.6501	0.959584	0.95557	1	5377	tags=37%, list=36%, signal=58%
[truncated: 36 more rows]

## Sheet: MM13_Aur_vs_DMSO
GSEA — Aur vs. DMSO | MM13 | Hallmark 2026, Reactome 2026, WikiPathways 2026 | Sorted by NES | Bold = Supplementary Fig. 5F
[truncated: 781 more rows]

[truncated: 2 more sheets: MM13_Vol_vs_DMSO, MM13_Vol+Aur_vs_DMSO]
