# Supplementary material
Source: Research Square preprint supplement (doi:10.21203/rs.3.rs-9577216/v1)
Supplement: Supplementary file 6 [file 9ec8f54ef3041d98e6725de6.docx]

**The Convergence of Senescence and Ferroptosis Amplifies DNA Damage and Triggers Apoptosis in Patient-Derived Melanoma Models**

Duca Daria1*, Lovati Giulia1*, Zocchi Angelica1º, Giardina Giuseppina1, Mileti Erika1, Melixetian Marine1, Lotti Fiorenza1^, Doni Mirko1, Marocchi Federica1, Lanfrancone Luisa1**§**

**Affiliations**

1Department of Experimental Oncology, European Institute of Oncology IRCCS, Milan, Italy;

º Present address: Eurofins Biolab Srl, Vimodrone, Milan, Italy

^ Present address: Innate Immunity Laboratory, Unit of Molecular Pathology, Biochemistry and Immunology, IRCCS MultiMedica, Milan, Italy.

* These authors contributed equally to this work

§**Corresponding author**: Luisa Lanfrancone, European Institute of Oncology, via Adamello 16 – 20139 Milan, Italy. Telephone number: +39 02 94375011. E-mail address: luisa.lanfrancone@ieo.it.

**Supplementary Information**

**Compounds for drug treatment**

The bioactive compound library comprising 460 molecules, was internally assembled using different commercial chemical libraries (Lopac 1280, Selleck Epigenetics, MicoSource 2010). PLK1 inhibitor Volasertib (BI-6727, number HY12137) was purchased from MedChemExpress (Monmouth Junction, NJ). TrxR inhibitor Auranofin (SKF-39162, Cat. S4307), mTOR inhibitor Everolimus (RAD001, Cat. S1120), GSK3 inhibitor LY2090314 (Cat. 7063) and CDK4/6 inhibitor Palbociclib (PD-0332991, Cat. S1116) were purchased from Selleck Chemicals (Munich, Germany). DNA-alkylating agent Temozolomide (CCRG 81045, Cat. T2577) was purchased from Merck (St Louis, MO). For *in vitro* studies, compounds were resuspended in DMSO at 10 mM (Volasertib, Auranofin, Everolimus), 8 mM (Palbociclib), and 50 mM (Temozolomide) stock concentration.

***In vivo* SA-β-gal activity**

Samples were obtained from MM27 xenograft tumors treated with two weekly doses of Volasertib (intravenous, 5 mg/kg) or control vehicle for one week. For β-Galactosidase staining, tumor sections were mounted in OCT. Thin sections were cut (5-10μm), mounted onto glass slides, fixed in cold slide fixative (0.2% Glutaraldehyde) for 10 min, washed in DPBS1X and immersed at 37°C for 16 h in homemade SA-β-Gal staining solution (1 mg/mL 5-bromo-4-chloro-3-indolyl-beta-d-galactopyranoside (X-gal), 40 mM citric acid, 160 mM Na2HPO4, 30 mM NaH2PO4, 5 mM potassium ferricyanide, 5 mM potassium ferrocyanide, 150 mM NaCl, and 2 mM MgCl2, 5% DMSO, pH = 6). Sections were then post-fixed in 4% PFA for 10 minutes and washed in DPBS1X followed by ddH2O. Sections were then mounted in Mowiol-DABCO and viewed under DM6 B HistoFluo microscope (Leica). Images were considered as a cell monolayer and after subtracting staining background, cell area was scored as positive (blue) or negative to SA-β-gal [1].

***In vitro* colony formation assay**

*In vitro* colony formation was assessed by Crystal violet staining. Briefly, MM27 cells were plated in triplicate in 12 wells (3,000 cells/well) and treated by a single exposure to either vehicle (DMSO), Volasertib, Auranofin or Volasertib + Auranofin combination for 48 + 72h. After the end of the treatment, medium was refreshed every 72h until DMSO wells reached confluency and cells were fixed and stained with Crystal violet solution prepared using 50% Crystal Violet solution (1% aqueous solution, Sigma-Aldrich, Cat. V5265), 35% EtOH (100%) and 15% ddH2O. Images were acquired using iBright 1500 Imaging System (ThermoFisher) and analysis was performed using Fiji analysis software (version 2.14.0).

Colony area quantification was performed using the ColonyArea plugin for Fiji (ImageJ 1.54p, Java 21.0.7 64-bit)[2]. Plate images were acquired and, where required, rotated to align wells to a standard orientation prior to analysis. Individual wells were selected as regions of interest and processed using the ColonyArea plugin configured for a 4 × 3 well-plate layout.

For each well, the plugin segmented stained colonies from background by thresholding pixel intensity, excluding the violet (crystal violet background) channel. The macro *Colony_measurer.ijm* was applied to each well selection to extract two quantitative outputs: (i) the percentage of well area covered by colonies (%Area, corrected for the elliptical well geometry by dividing the raw area fraction by the in/total pixel ratio computed within the circular well boundary), and (ii) the intensity percentage, calculated as the ratio of the integrated pixel intensity of stained regions to the maximum possible intensity across the same area (intensity% = Σ(area × mean) / [area × 255 × ratio] × 100). Results were exported as tab-delimited text files for downstream statistical analysis. Colony-covered surface area (% area) was used as the primary endpoint for comparisons between treatment conditions.

**RNA extraction and RT-qPCR validation of ferroptosis genes**

Total RNA was extracted from treated PDX cells using the Quick-RNA MiniPrep (Zymo Research, Cat. R1055), following the manufacturer’s instructions. RNA was reverse transcribed into cDNA using OneScript Plus cDNA synthesis kit (Abm Industries, Cat. G236), following the manufacturer’s instructions. Real-Time qPCR was performed on the CFX Opus 92 BioRad instrument, with Fast-SYBR Green Master mix 2x (Applied Biosystem, Cat. #4385614), specific forward and reverse primer mixture (0.4 μM), and 20 ng cDNA per reaction. The relative quantification of gene expression was determined using the 2-DCt method. 18Swas used as a housekeeping gene [forward 5´- CGCCGCTAGAGGTGAAAT -3´, reverse 5´- CTTTCGCTCTGGTCCGTCTT -3´]. The following qPCR primers were used: HMOX1 [forward 5´-CCAGGCAGAGAATGCTGAGTTC-3´, reverse 5´- AAGACTGGGCTCTCCTTGTTGC-3´], SLC7A11 [forward 5´-ATGCAGTGGCAGTGACCTTT-3´, reverse 5´-GGCAACAAAGATCGGAACTG-3´].

**Generation of transcriptional signature heatmaps**

Transcriptional signature analyses were performed using gene expression data from MM27, MM13, and MM16 PDX models derived from Bossi et al. [3]. Raw sequencing data from that study were re-processed to obtain transcript-level quantification, and expression values were reported as transcripts per million (TPM). For all downstream analyses, expression was log2-transformed as log2(TPM+1). The complete expression matrix, comprising 13,888 genes with TPM > 0 in at least one model, is reported in Supplementary Table 4 together with the corresponding log2(TPM+1) values and within-sample transcriptome-scaled z-scores (described below). These log2(TPM+1) values from Supplementary Table 4 served as the common starting point for all transcriptional analyses described below, including the melanoma cell-state signature heatmaps (Supplementary Table 5), the drug vulnerability and mitotic dependency indices (Supplementary Table 6), and the stress-response gene set analysis (Supplementary Table 12).

Two distinct z-score normalizations were applied depending on the analysis objective, and these are kept strictly separate throughout. (i) *Cross-sample z-scores* (gene-wise, across the three PDX models): for each gene, the log2(TPM+1) values across MM27, MM13, and MM16 were standardized as zij = (xij − μi) / σi, where xij is the log2(TPM+1) expression of gene i in sample j, and μi and σi are the mean and population standard deviation (denominator n = 3) of gene i across the three PDX models. These cross-sample z-scores are used for heatmap visualization in Supplementary Tables 5 and 12. (ii) *Within-sample transcriptome-scaled z-scores*: for each PDX model, the log2(TPM+1) of each gene was standardized across all 13,888 expressed genes within that sample: zg,i = (xg,i − μi) / σi, where μi and σi are computed across all expressed genes in sample i (population standard deviation). These within-sample z-scores, reported in Supplementary Table 4, are used for drug vulnerability and mitotic dependency calculations (Supplementary Table 6).

**Melanoma cell-state signature heatmaps**

Melanoma cell-state signatures from Tsoi et al. (2018) and Belote et al. (2021) were used to characterize transcriptional identity across the three PDX models[4,5]. The full list of 580 signature genes, together with their log2(TPM+1) values and cross-sample z-scores, is reported in Supplementary Table 5. Expression values were retrieved from Supplementary Table 4. Cross-sample z-scores were computed gene-wise across the three PDX models using the formula described above (population standard deviation, n = 3).

*Gene-level heatmap.* The gene-level heatmap (Supplementary Fig. 3A) was generated from the cross-sample z-score matrix. Genes were subjected to unsupervised hierarchical clustering independently within each signature using Spearman rank correlation distance (1−ρ) with average linkage (UPGMA). The clustered gene order and z-score matrix are provided in Supplementary Table 5.

*Signature-level summary heatmap.* A summary heatmap (Fig. 3A) was generated by computing, for each PDX model, a signature score defined as the unweighted mean of the cross-sample z-scores across all member genes of each signature: SignatureScorej = (1/n) × ∑i zij, where n is the total number of genes in the signature and zij is the cross-sample z-score of gene i in PDX j. Each gene contributes equally regardless of expression magnitude, minimizing bias from differences in signature size. Scores were computed across all 580 signature genes from Supplementary Table 5, including all genes expressed in at least one PDX model. Signature scores and ranks for all 13 signatures across the three PDX models are reported in Supplementary Table 5. Signatures were arranged according to the biological progression defined in Tsoi et al. (2018) and Belote et al. (2021), from less differentiated to more differentiated cell states, without hierarchical clustering.

*MITF–AXL index.* The MITF–AXL index was calculated for each PDX model as log2(TPM+1)MITF − log2(TPM+1)AXL, using expression values from Supplementary Table 4. Positive values indicate relative enrichment of MITF-associated differentiation programs; negative values indicate relative enrichment of AXL-associated invasive programs. Values are reported in Supplementary Table 5.

**Drug vulnerability and mitotic dependency analyses**

*Signed drug pathway index.* Drug-associated gene panels for volasertib, palbociclib, everolimus, and temozolomide were assembled by selecting direct drug targets, core pathway components, and functionally relevant regulators. Gene selection was based on pathway annotations from MSigDB Hallmark gene sets v2024.1.Hs, Reactome Pathway Database v91, Gene Ontology release 2024-10, and KEGG Pathway Database release 2024.2, integrated with literature-based evidence. Each gene was assigned a directional weight reflecting its functional role: wg = +1 for genes whose high expression reflects pathway activation or drug sensitivity, and wg = −1 for genes whose high expression reflects pathway suppression or drug resistance. For each drug and each PDX model, the signed drug pathway index was calculated as the weighted mean of within-sample transcriptome-scaled z-scores across all panel genes: Drug Indexi = (1/n) × ∑ wg × zg,i, where n is the number of genes in the panel, wg ∈ {+1, −1} is the directional weight, and zg,i is the within-sample transcriptome-scaled z-score from Supplementary Table 4. Positive index values indicate relative pathway activation; negative values indicate relative suppression. The complete signed gene panels with directional weights, log2(TPM+1) values, and z-scores per gene per PDX model are reported in Supplementary Table 6. Results are presented as descriptive of relative pathway activity within this cohort.

*Mitotic dependency index.* A curated 30-gene mitotic signature was assembled based on genes involved in G2/M transition, mitotic spindle assembly, spindle assembly checkpoint regulation, chromosome segregation, cytokinesis, and DNA replication-associated cell cycle progression. Gene selection drew from MSigDB Hallmark gene sets v2024.1.Hs, Reactome Pathway Database v91, Gene Ontology release 2024-10, and KEGG Pathway Database release 2024.2. All 30 genes are positive contributors to mitotic pathway activity; no directional weighting was therefore required. The annotated gene list, grouped by functional category, is provided in Supplementary Table 6.

For heatmap visualization (Supplementary Fig. 3D), the log2(TPM+1) values of the 30 signature genes were standardized using cross-sample z-scores (gene-wise across the three PDX models, population standard deviation, as described above). Gene rows were subjected to unsupervised hierarchical clustering using Spearman rank correlation distance (1−ρ) with average linkage (UPGMA); PDX columns were maintained in fixed order. The cross-sample z-scores and within-sample transcriptome-scaled z-scores for all 30 signature genes are reported in Supplementary Table 6.

The mitotic dependency index was calculated to estimate global mitotic pathway activity relative to the full transcriptional background of each tumor. Using within-sample transcriptome-scaled z-scores (from Supplementary Table 4), the index was computed as the unweighted mean z-score across all 30 signature genes: Mitotic Indexi = (1/30) × ∑ zg,i [g ∈ mitotic signature]. This yielded index values of 0.844 (MM27), 0.884 (MM13), and 0.485 (MM16), indicating higher relative activation of mitotic programs in MM13 and MM27 compared to MM16. Index values and their interpretation are reported in Supplementary Table 6.

**Functional enrichment analysis of differentially expressed genes**

Differentially expressed genes (DEGs) identified by bulk RNA-seq analysis were subjected to functional enrichment analysis using Enrichr [6–8]. Separate analyses were performed for upregulated DEGs (log2FC > 1, adjusted *p* < 0.05) and downregulated DEGs (log2FC < −1, adjusted *p* < 0.05) relative to vehicle-treated controls (DMSO). Gene lists were submitted independently to the Enrichr platform and queried against the following databases: MSigDB Hallmark 2020, WikiPathways 2024 Human, Reactome Pathways 2024, KEGG 2026, Gene Ontology Biological Process 2025, Gene Ontology Cellular Component 2025, Gene Ontology Molecular Function 2025, BioPlanet 2019, PANTHER 2016, NCI-Nature 2016, KEA 2015, MGI Mammalian Phenotype Level 4, Elsevier Pathway Collection, and ARCHS4 Kinases Coexpression.

For each database query, Enrichr computes an overlap-based enrichment statistic and reports a Fisher’s exact test *p*‑value, an adjusted *p*‑value corrected for multiple testing using the Benjamini–Hochberg method, an odds ratio, and a combined score defined as the product of the log-transformed *p*‑value and the z-score of the deviation from the expected rank: CS = log(*p*) × z. The combined score therefore integrates both statistical significance and the magnitude of enrichment relative to background, penalizing pathways that rank highly only due to large gene set size.

Pathway results were filtered to retain terms with adjusted *p*‑value < 0.05. For visualization, pathways were further selected based on dual-criterion ranking: terms were prioritized according to their adjusted *p*‑value and their combined score, retaining pathways that ranked among the top enriched terms across both metrics. This approach ensures that selected pathways are both statistically robust and biologically discriminating, excluding terms driven solely by large gene set overlap without proportional enrichment signal. The overlap percentage for each term was calculated as the ratio of input genes matching the pathway gene set to the total genes in the pathway, expressed as a percentage: Overlap (%) = (*n* matched / *n* pathway) × 100. Full enrichment results for all queried databases, including ranked pathway lists with overlap counts, overlap percentage, odds ratios, combined scores, and contributing gene lists, are reported in Supplementary Tables 7 (MM27) and 8 (MM13).

**Identification of common differentially expressed genes and cross-treatment pathway analysis**

To characterize transcriptional responses shared between MM27 and MM13 PDX models, differentially expressed genes (DEGs) identified in each model by bulk RNA-seq were intersected across the two models for each treatment condition. Common DEGs were defined as genes meeting the significance and fold-change thresholds (|log2FC| > 1, adjusted *p* < 0.05) in both MM27 and MM13 independently. This approach was applied to two comparisons: (i) sequential volasertib–auranofin combination versus vehicle control (Vol+Aur vs. DMSO), yielding 130 common upregulated and 60 common downregulated genes; and (ii) auranofin single-agent treatment versus vehicle control (Aur vs. DMSO), yielding 87 common upregulated and 41 common downregulated genes. For each model, log2 fold changes and adjusted *p*‑values are reported for both MM27 and MM13 in the corresponding gene lists (Supplementary Tables 9–10).

Common DEG lists were subjected to functional enrichment analysis using Enrichr following the same analytical framework described above for the single-model analyses. Enrichment was queried against the following databases for upregulated common DEGs: Reactome Pathways 2024, WikiPathways 2024 Human, KEGG 2021 Human, and MSigDB Hallmark 2020. For downregulated common DEGs, the following databases were queried: NCI-Nature 2016, KEA 2015, Gene Ontology Biological Process 2025, and ARCHS4 Kinases Coexpression. Database selection was consistent across both treatment comparisons to enable direct cross-condition comparison of shared transcriptional programs.

Pathway results were filtered to retain terms with adjusted *p*‑value < 0.05 and ranked by dual criterion (adjusted *p*‑value and combined score) as described above. The overlap percentage was calculated as (*n* matched / *n* pathway) × 100. Pathways represented in Figures 5D–E are highlighted in bold in the corresponding supplementary tables. Complete enrichment results, including ranked pathway lists with overlap counts, overlap percentage, odds ratios, combined scores, and contributing gene lists, are reported in Supplementary Table 9 (Vol+Aur vs. DMSO common DEGs) and Supplementary Table 10 (Aur vs. DMSO common DEGs).

**Gene–pathway clustergram**

To visualize the functional organization of the shared transcriptional response to the volasertib–auranofin combination, a gene–pathway clustergram was generated using the common upregulated DEGs identified in both MM27 and MM13 (log2FC > 1, adjusted *p* < 0.05 in both models; see above). Functional enrichment of this common gene set was performed using Enrichr across three gene set libraries: MSigDB Hallmark 2020, WikiPathways 2024 Human, and Reactome Pathways 2024. For each library, the top three enriched terms were selected based on adjusted *p*‑value, yielding a total of nine pathways. For each selected pathway, the subset of input genes contributing to the enrichment was extracted.

A gene–pathway association matrix was constructed from these contributing genes. Only genes present in at least one of the nine selected pathways were retained, resulting in a final set of 16 genes. The binary membership matrix (1 = gene present in pathway, 0 = absent) was then converted to an enrichment-weighted gene score by multiplying each entry by the negative decadic logarithm of the adjusted *p*‑value of the corresponding pathway: enrichment score = binary membership × (−log10(adj. *p*)). This transformation weights each gene–pathway association by the statistical strength of pathway enrichment, giving greater prominence to terms with stronger adjusted *p*‑values regardless of overlap size.

Hierarchical clustering was applied to the gene axis using Ward’s minimum variance linkage on Euclidean distances, grouping genes by similarity of their enrichment-weighted profiles across pathways. The pathway axis was not subjected to hierarchical clustering but was manually ordered according to biological function to improve interpretability, arranging terms into three functional modules: inflammatory signaling (NF-κB/TNF), oxidative stress and NRF2-mediated antioxidant response, and cell death-associated pathways (ferroptosis and apoptosis). The resulting matrix was visualized as a clustergram (Fig. 5C).

**Gene Set Enrichment Analysis (GSEA)**

Gene Set Enrichment Analysis (GSEA) was performed using GSEA software (version 4.4.0; Broad Institute)[9,10] to characterize transcriptional programs coordinately regulated by auranofin single-agent treatment (Aur vs. DMSO), volasertib single-agent treatment (Vol vs. DMSO), and sequential combination treatment (Vol+Aur vs. DMSO), relative to vehicle control. Analysis was conducted independently for MM27 and MM13 PDX models across all three comparisons, using DESeq2-normalized count matrices from three biological replicates per condition.

Analyses were run in pre-ranked mode (GseaPreranked) using the Signal2Noise metric as the ranking statistic, with gene sorting in real-valued descending order. The “No Collapse” option was selected to preserve the original gene identifiers without remapping to gene symbols. Gene set permutation (1,000 permutations) was used as the permutation type, and the weighted enrichment statistic (*p* = 1) was applied. Gene sets were queried against three databases: MSigDB Hallmark 2026, WikiPathways 2026 Human, and Reactome Pathways 2026. Minimum and maximum gene set size thresholds were set to default values (15 and 500, respectively).

Enrichment results were filtered to retain gene sets with a false discovery rate (FDR) < 0.25 as per standard GSEA practice. Pathways discussed in the text and shown in figures meet the more stringent threshold of FDR < 0.05. Complete GSEA results for all queried gene sets, all three treatment comparisons, and both PDX models are reported in Supplementary Table 11.

**Stress-response gene set analysis**

A curated stress-response gene set of 99 genes was assembled to profile basal cellular stress programs across the three PDX models. Gene selection integrated MitoCarta 3.0, Gene Ontology (GO; release 2024-10), Reactome Pathway Database (v91), and MSigDB Hallmark gene sets (v2024.1.Hs). Genes were organized into four biologically defined signatures: ROS defense (n = 25), hypoxia/metabolic stress (n = 24), mitochondrial unfolded protein response (UPRmt; n = 25), and ER unfolded protein response (UPRER; n = 25). DDIT3 (CHOP) is annotated in both UPRmt and UPRER, reflecting its role as a transcriptional effector of both programs; it is counted independently in each signature. Gene annotations, GO terms, Reactome pathways, Hallmark gene set membership, and MitoCarta annotations are provided in Supplementary Table 12.

For each gene, log2(TPM+1) values were retrieved from Supplementary Table 4 and cross-sample z-scores were computed gene-wise across the three PDX models (population standard deviation, as described above). These z-scores are reported together with expression values in Supplementary Table 12 and were used for all subsequent analyses. Genes within each signature were subjected to unsupervised hierarchical clustering based on their z-score profiles using Spearman rank correlation distance (d = 1−ρ) and average linkage (UPGMA). For signature-level clustering (Fig. 6A), mean z-scores were computed for each signature per PDX model as the unweighted mean across all member genes (analogously to the signature scores described above), and the same Spearman/UPGMA approach was applied to the resulting 4×3 matrix to order both signatures and PDX columns. The stress index for each signature in each PDX is thus defined as: Stress Indexk,i = (1/nk) × ∑ zg,i [g ∈ signature k], where nk is the number of genes in signature k and zg,i is the cross-sample z-score of gene g in PDX i. Stress index values are reported in Supplementary Table 12.

## Immunofluorescence image analysis

All image analyses were performed in Fiji (ImageJ 1.54p, Java 21.0.7 64-bit) using a set of custom macros written in the ImageJ macro language. Multichannel images were first split into individual channel files; where z-stacks were acquired, maximum intensity projection was applied prior to analysis. Nuclei (DAPI) were segmented using a fixed-threshold approach after rolling-ball background subtraction and Gaussian smoothing, generating nuclear ROIs used by all downstream channel-specific macros.

γH2AX foci (AF647) were quantified per nucleus by local maxima detection followed by particle-level validation within each nuclear ROI; false candidates touching the nuclear border or outside the accepted size range were rejected. Cell body area was quantified from the phalloidin channel (AF488) by fixed-threshold segmentation of F-actin signal normalized to nuclear count. Micronuclei were detected in the DAPI channel as extranuclear DAPI-positive bodies within defined size (2 – 30 px²) and circularity (≥ 0.3) constraints, with automated exclusion of intranuclear candidates; automated counts were subsequently reviewed and manually curated by visual inspection for accuracy. Full macro code, parameter values, and output formats are provided as Supplementary Files: *Supplementary_Macro_Nuclei.ijm, Supplementary_Macro_yH2AX.ijm*, *Supplementary_Macro_CellArea.ijm*, *Supplementary_Macro_Micronuclei.ijm*.

**Quantification and statistical analysis**

Statistical analyses were performed using GraphPad Prism 11.0 (v11.0.1; GraphPad Software Inc., La Jolla, CA, USA). Outliers were identified and excluded using the ROUT method (Q = 1–10%). When appropriate, data normality was assessed, and subsequent statistical tests were selected accordingly. Comparisons were conducted using Student’s t-test or one-way or two-way analysis of variance (ANOVA), followed by suitable post hoc multiple-comparison tests. Statistical significance is reported as p < 0.05, p < 0.01, p < 0.001, and p < 0.0001; “ns” indicates no statistically significant difference. Unless otherwise stated in the figure legends, experiments were performed with at least three independent biological replicates, and data are presented as mean ± standard deviation (SD). For *in vivo* studies, survival was analyzed using Kaplan–Meier curves with significance determined by the log-rank (Mantel–Cox) test.

**Use of Large Language models**

Generative AI tools (Claude, Anthropic; ChatGPT, OpenAI) were used to assist in the development of custom analysis scripts for log2(TPM+1) data processing and in the writing of Fiji macros for image analysis. AI assistance was also employed for grammatical and stylistic revision of the manuscript text. All code and AI-assisted content were critically reviewed, validated, and approved by the authors, who take full responsibility for the accuracy and integrity of the work.

**References**

[1] A. Krzystyniak, A. Gluchowska, G. Mosieniak, E. Sikora, Fiji-Based Tool for Rapid and Unbiased Analysis of SA-β-Gal Activity in Cultured Cells, Biomolecules 13 (2023) 362. https://doi.org/10.3390/BIOM13020362/S1.

[2] C. Guzmán, M. Bagga, A. Kaur, J. Westermarck, D. Abankwa, ColonyArea: An ImageJ Plugin to Automatically Quantify Colony Formation in Clonogenic Assays, PLoS One 9 (2014) e92444. https://doi.org/10.1371/JOURNAL.PONE.0092444.

[3] D. Bossi, A. Cicalese, G.I. Dellino, L. Luzi, L. Riva, C. D’Alesio, G.R. Diaferia, A. Carugo, E. Cavallaro, R. Piccioni, M. Barberis, G. Mazzarol, A. Testori, S. Punzi, I. Pallavicini, G. Tosti, L. Giacó, G. Melloni, T.P. Heffernan, G. Natoli, G.F. Draetta, S. Minucci, P. Pelicci, L. Lanfrancone, In Vivo genetic screens of patient-derived tumors revealed unexpected frailty of the transformed phenotype, Cancer Discov. 6 (2016) 650–663. https://doi.org/10.1158/2159-8290.CD-15-1200.

[4] J. Tsoi, L. Robert, K. Paraiso, C. Galvan, K.M. Sheu, J. Lay, D.J.L. Wong, M. Atefi, R. Shirazi, X. Wang, D. Braas, C.S. Grasso, N. Palaskas, A. Ribas, T.G. Graeber, Multi-stage Differentiation Defines Melanoma Subtypes with Differential Vulnerability to Drug-Induced Iron-Dependent Oxidative Stress, Cancer Cell 33 (2018) 890-904.e5. https://doi.org/10.1016/j.ccell.2018.03.017.

[5] R.L. Belote, D. Le, A. Maynard, U.E. Lang, A. Sinclair, B.K. Lohman, V. Planells-Palop, L. Baskin, A.D. Tward, S. Darmanis, R.L. Judson-Torres, Human melanocyte development and melanoma dedifferentiation at single-cell resolution, Nat. Cell Biol. 23 (2021) 1035–1047. https://doi.org/10.1038/s41556-021-00740-8.

[6] Z. Xie, A. Bailey, M. V. Kuleshov, D.J.B. Clarke, J.E. Evangelista, S.L. Jenkins, A. Lachmann, M.L. Wojciechowicz, E. Kropiwnicki, K.M. Jagodnik, M. Jeon, A. Ma’ayan, Gene Set Knowledge Discovery with Enrichr, Curr. Protoc. 1 (2021) e90. https://doi.org/10.1002/CPZ1.90.

[7] M. V. Kuleshov, M.R. Jones, A.D. Rouillard, N.F. Fernandez, Q. Duan, Z. Wang, S. Koplev, S.L. Jenkins, K.M. Jagodnik, A. Lachmann, M.G. McDermott, C.D. Monteiro, G.W. Gundersen, A. Maayan, Enrichr: a comprehensive gene set enrichment analysis web server 2016 update, Nucleic Acids Res. 44 (2016) W90–W97. https://doi.org/10.1093/NAR/GKW377.

[8] E.Y. Chen, C.M. Tan, Y. Kou, Q. Duan, Z. Wang, G. V. Meirelles, N.R. Clark, A. Ma’ayan, Enrichr: interactive and collaborative HTML5 gene list enrichment analysis tool, BMC Bioinformatics 14 (2013). https://doi.org/10.1186/1471-2105-14-128.

[9] V.K. Mootha, C.M. Lindgren, K.F. Eriksson, A. Subramanian, S. Sihag, J. Lehar, P. Puigserver, E. Carlsson, M. Ridderstråle, E. Laurila, N. Houstis, M.J. Daly, N. Patterson, J.P. Mesirov, T.R. Golub, P. Tamayo, B. Spiegelman, E.S. Lander, J.N. Hirschhorn, D. Altshuler, L.C. Groop, PGC-1α-responsive genes involved in oxidative phosphorylation are coordinately downregulated in human diabetes, Nature Genetics 2003 34:3 34 (2003) 267–273. https://doi.org/10.1038/ng1180.

[10] A. Subramanian, P. Tamayo, V.K. Mootha, S. Mukherjee, B.L. Ebert, M.A. Gillette, A. Paulovich, S.L. Pomeroy, T.R. Golub, E.S. Lander, J.P. Mesirov, Gene set enrichment analysis: A knowledge-based approach for interpreting genome-wide expression profiles, Proc. Natl. Acad. Sci. U. S. A. 102 (2005) 15545–15550. https://doi.org/10.1073/PNAS.0506580102;WEBSITE:WEBSITE:PNAS-SITE;ISSUE:ISSUE:DOI.
