# Supplementary material
Source: Research Square preprint supplement (doi:10.21203/rs.3.rs-9577216/v1)
Supplement: Supplementary file 7 [file 8b70791e6d975425566af83a.xlsx]

## Sheet: INDEX
Supplementary Table 6. Drug vulnerability and mitotic dependency indices across PDX models
Transcriptome-scaled drug vulnerability index, signed gene panels, mitotic dependency index and annotated mitotic gene signature heatmap.
Sheet	Description	PDX models	Notes
Drug_Vulnerability_Index	Transcriptome-scaled weighted mean z-score per drug per PDX	MM27, MM13, MM16	Weighted mean of within-sample z-scores using signed gene panels
Drug_Gene_Panels	Signed gene panels: directional weights (+1/−1), functional annotations, log₂(TPM+1) and z-scores	MM27, MM13, MM16	Weights: +1 = pathway activation; −1 = pathway suppression
Mitotic_Dependency_Index	Mean transcriptome-scaled z-score across 30-gene mitotic signature per PDX	MM27, MM13, MM16	Reflects relative activation of mitotic program
Mitotic_Signature_Heatmap	30-gene mitotic signature in clustered order with annotations and z-scores	MM27, MM13, MM16	Cross-sample z (visualization) + transcriptome z (index). Gene order: Spearman distance, average linkage (UPGMA).

## Sheet: Drug_Vulnerability_Index
Drug Vulnerability Index per PDX — transcriptome-scaled weighted mean z-score
Drug index = (1/n) × Σ w_g × z_g,i where w_g ∈ {+1,−1} and z_g,i is the within-sample transcriptome z-score. Higher values indicate greater relative activation of the targeted pathway.
Drug	MM27 index	MM13 index	MM16 index	Highest vulnerability
Volasertib	0.7226	0.8058	0.2335	MM13
Everolimus	0.1749	0.4043	0.2068	MM13
Palbociclib	0.5172	0.7367	0.1257	MM13
Temozolomide	0.2139	0.1641	0.0818	MM27

## Sheet: Drug_Gene_Panels
Drug gene panels — directional weights, functional annotations and transcriptome-scaled z-scores
Directional weight: +1 = gene expression reflects pathway activation/sensitivity; −1 = gene expression reflects pathway suppression/resistance. Transcriptome z-score = within-sample standardization.
Drug	Gene	Directional weight	Functional category	Dataset annotation	MM27 log₂(TPM+1)	MM13 log₂(TPM+1)	MM16 log₂(TPM+1)	MM27 z-score	MM13 z-score	MM16 z-score
Everolimus	AKT1	1	AKT kinase	Hallmark PI3K-AKT-mTOR	7.4557	6.913	8.2515	1.3884	1.2338	1.6977
Everolimus	AKT2	1	AKT kinase isoform	KEGG PI3K-AKT	6.1969	5.5367	6.0594	0.8278	0.6351	0.7428
Everolimus	MTOR	1	mTOR kinase	KEGG PI3K-AKT-mTOR; Hallmark mTOR signaling	5.7162	4.4155	5.4647	0.6137	0.1474	0.4837
Everolimus	PIK3CA	1	PI3K catalytic subunit	KEGG PI3K-AKT	3.9117	3.9533	4.225	-0.19	-0.0537	-0.0564
Everolimus	PIK3CB	1	PI3K catalytic subunit beta	KEGG PI3K-AKT	4.6679	3.9203	3.8032	0.1468	-0.0681	-0.2401
Everolimus	PTEN	-1	PI3K pathway suppressor	KEGG PI3K-AKT; GO tumor suppressor	0.5059	5.7266	1.8758	-1.707	0.7177	-1.0797
Everolimus	RICTOR	1	mTORC2 component	Reactome mTOR signaling	4.3399	4.3313	3.9458	0.0007	0.1107	-0.178
Everolimus	RPTOR	1	mTORC1 scaffold	Reactome mTOR signaling	5.1771	4.8253	5.6088	0.3736	0.3256	0.5465
Everolimus	TSC1	-1	mTOR inhibitor	Reactome mTOR regulation	3.9855	5.2679	3.4893	-0.1572	0.5182	-0.3768
Everolimus	TSC2	-1	mTOR inhibitor	Reactome mTOR regulation	5.3537	5.1723	5.5674	0.4522	0.4766	0.5285
Palbociclib	CCND3	1	Cyclin D3	KEGG Cell Cycle	6.4925	5.9399	6.2756	0.9594	0.8105	0.837
Palbociclib	CDK4	1	G1/S kinase	KEGG Cell Cycle; Hallmark E2F targets	8.0443	8.289	8.3915	1.6506	1.8324	1.7588
Palbociclib	CDK6	1	G1/S kinase	KEGG Cell Cycle	4.5298	4.7517	5.3038	0.0853	0.2936	0.4136
Palbociclib	CDKN2A	-1	CDK inhibitor	KEGG Cell Cycle	4.0072	4.7021	0.0426	-0.1475	0.272	-1.8783
Palbociclib	CDKN2B	-1	CDK inhibitor	KEGG Cell Cycle	4.784	5.0959	0.0566	0.1985	0.4434	-1.8723
Palbociclib	E2F1	1	Cell cycle TF	Hallmark E2F targets	5.4663	4.8171	5.2403	0.5024	0.3221	0.386
Palbociclib	E2F2	1	Cell cycle TF	Hallmark E2F targets	3.7214	1.4114	2.8875	-0.2748	-1.1595	-0.639
Palbociclib	RB1	-1	Cell cycle checkpoint	KEGG Cell Cycle	6.4904	5.7811	5.3778	0.9585	0.7414	0.4459
Temozolomide	ATR	1	Replication stress kinase	Reactome DNA damage	3.497	4.0583	3.8904	-0.3747	-0.008	-0.2021
Temozolomide	CHEK1	1	Checkpoint kinase	Reactome DNA checkpoint	4.2735	3.5497	4.1367	-0.0289	-0.2293	-0.0948
Temozolomide	CHEK2	1	Checkpoint kinase	Reactome DNA checkpoint	5.6467	4.0661	3.7137	0.5827	-0.0046	-0.2791
Temozolomide	MLH1	1	Mismatch repair	KEGG Mismatch Repair	4.888	5.6413	5.1077	0.2448	0.6806	0.3282
Temozolomide	MSH2	1	Mismatch repair	KEGG Mismatch Repair	5.9269	5.1114	5.4195	0.7076	0.4501	0.464
Temozolomide	MSH6	1	Mismatch repair	KEGG Mismatch Repair	6.1303	5.6929	5.5144	0.7981	0.7031	0.5054
Temozolomide	PMS1	1	Mismatch repair	KEGG Mismatch Repair	3.991	4.2133	3.6882	-0.1547	0.0594	-0.2902
Temozolomide	PMS2	1	Mismatch repair	KEGG Mismatch Repair	4.2965	4.4243	4.4502	-0.0187	0.1512	0.0418
Volasertib	AURKB	1	Chromosome segregation kinase	Reactome v91 mitosis; GO chromosome segregation	6.3176	6.4024	4.6058	0.8815	1.0117	0.1096
Volasertib	BUB1	1	Spindle checkpoint kinase	GO spindle assembly checkpoint	6.0027	5.7597	5.2399	0.7413	0.7321	0.3858
Volasertib	BUB1B	1	Mitotic checkpoint protein	Reactome mitotic checkpoint	6.2091	5.1997	4.855	0.8332	0.4885	0.2181
Volasertib	CCNB1	1	Cyclin B G2/M transition	KEGG Cell Cycle; Hallmark G2M	6.3014	7.3816	6.2065	0.8743	1.4377	0.8069
Volasertib	CCNB2	1	Cyclin B mitotic entry	KEGG Cell Cycle	6.4814	6.6978	5.7965	0.9545	1.1402	0.6283
Volasertib	CDC25C	1	CDK1 phosphatase	Reactome cell cycle checkpoint	3.9982	3.8043	2.4033	-0.1515	-0.1185	-0.85
Volasertib	CDK1	1	Mitotic CDK	KEGG Cell Cycle; Reactome M phase	6.0551	6.1995	4.5059	0.7646	0.9234	0.066
Volasertib	KIF11	1	Spindle motor protein	GO spindle organization	5.2555	5.6014	4.1077	0.4085	0.6632	-0.1074
Volasertib	PLK1	1	Mitotic kinase	KEGG 2024.2 Cell Cycle; Reactome v91 Mitotic cell cycle; Hallmark G2M v2024.1	6.7416	6.4606	5.7785	1.0704	1.037	0.6204

## Sheet: Mitotic_Dependency_Index
Mitotic Dependency Index per PDX — mean transcriptome-scaled z-score across 30-gene signature
Mitotic index = (1/30) × Σ z_g,i where z_g,i is the within-sample transcriptome z-score. All 30 genes are positive contributors; no directional weighting required.
PDX	Mitotic Dependency Index	Interpretation
MM27	0.8439	High mitotic dependency (index = 0.844)
MM13	0.8836	Highest mitotic dependency (index = 0.884)
MM16	0.4849	Low mitotic dependency (index = 0.485)

## Sheet: Mitotic_Signature_Heatmap
Mitotic gene signature (30 genes) | Clustered gene order (Spearman, UPGMA) | Visualization z-scores + transcriptome z-scores
Cross-sample z (visualization): gene-wise row z-score across 3 PDX models. Transcriptome z: within-sample z-score across all transcriptome genes. Both use population SD. Gene order from unsupervised hierarchical clustering on rows using Spearman correlation distance (1−ρ) and average linkage (UPGMA).
Gene	Functional category	Dataset annotation	MM27 log₂(TPM+1)	MM13 log₂(TPM+1)	MM16 log₂(TPM+1)	MM27 cross-sample z	MM13 cross-sample z	MM16 cross-sample z	MM27 transcriptome z	MM13 transcriptome z	MM16 transcriptome z
CENPF	Kinetochore protein	KEGG Cell Cycle; Reactome G2M v91; Hallmark G2M v2024.1	6.4278	5.9907	6.0387	1.4071	-0.8261	-0.581	0.9306	0.8326	0.7338
RRM2	DNA synthesis	KEGG Cell Cycle; Reactome G2M v91; Hallmark G2M v2024.1	7.0877	6.4248	6.6317	1.3468	-1.047	-0.2998	1.2245	1.0214	0.9921
MAD2L1	Checkpoint	KEGG Cell Cycle; Reactome G2M v91; Hallmark G2M v2024.1	6.7879	5.5708	6.0139	1.3196	-1.1003	-0.2193	1.091	0.6499	0.723
TOP2A	DNA topology mitosis	KEGG Cell Cycle; Reactome G2M v91; Hallmark G2M v2024.1	7.4503	6.9767	7.1515	1.3167	-1.1052	-0.2115	1.386	1.2615	1.2185
MCM6	DNA replication	KEGG Cell Cycle; Reactome G2M v91; Hallmark G2M v2024.1	6.2795	5.3933	5.72	1.3169	-1.1048	-0.2121	0.8646	0.5727	0.5949
PCNA	DNA replication	KEGG Cell Cycle; Reactome G2M v91; Hallmark G2M v2024.1	8.59	8.8805	8.4427	-0.2626	1.3348	-1.0721	1.8936	2.0897	1.781
CCNB1	G2/M cyclin	KEGG Cell Cycle; Reactome G2M v91; Hallmark G2M v2024.1	6.3014	7.3816	6.2065	-0.6162	1.4105	-0.7942	0.8743	1.4377	0.8069
KIF2C	Microtubule depolymerase	KEGG Cell Cycle; Reactome G2M v91; Hallmark G2M v2024.1	5.3023	5.9067	5.1493	-0.4601	1.3882	-0.928	0.4293	0.796	0.3463
AURKB	Chromosome segregation	KEGG Cell Cycle; Reactome G2M v91; Hallmark G2M v2024.1	6.3176	6.4024	4.6058	0.6552	0.7577	-1.413	0.8815	1.0117	0.1096
CDK1	Mitotic CDK	KEGG Cell Cycle; Reactome G2M v91; Hallmark G2M v2024.1	6.0551	6.1995	4.5059	0.6108	0.7992	-1.41	0.7646	0.9234	0.066
TPX2	Spindle assembly	KEGG Cell Cycle; Reactome G2M v91; Hallmark G2M v2024.1	6.8864	6.9639	6.212	0.5892	0.8188	-1.408	1.1349	1.256	0.8093
KIF20A	Mitotic kinesin	KEGG Cell Cycle; Reactome G2M v91; Hallmark G2M v2024.1	5.8689	6.2843	5.1027	0.2389	1.0877	-1.3266	0.6817	0.9603	0.326
MKI67	Proliferation marker	KEGG Cell Cycle; Reactome G2M v91; Hallmark G2M v2024.1	5.4874	5.9828	3.6229	0.4492	0.9368	-1.3859	0.5118	0.8291	-0.3186
PRC1	Cytokinesis	KEGG Cell Cycle; Reactome G2M v91; Hallmark G2M v2024.1	7.1265	7.3803	6.1245	0.46	0.9282	-1.3881	1.2418	1.4371	0.7712
CCNB2	G2/M cyclin	KEGG Cell Cycle; Reactome G2M v91; Hallmark G2M v2024.1	6.4814	6.6978	5.7965	0.4065	0.9698	-1.3763	0.9545	1.1402	0.6283
KIF11	Spindle motor	KEGG Cell Cycle; Reactome G2M v91; Hallmark G2M v2024.1	5.2555	5.6014	4.1077	0.4187	0.9605	-1.3792	0.4085	0.6632	-0.1074
CDC25C	CDK1 activator	KEGG Cell Cycle; Reactome G2M v91; Hallmark G2M v2024.1	3.9982	3.8043	2.4033	0.8392	0.5662	-1.4054	-0.1515	-0.1185	-0.85
CDCA3	Cell cycle	KEGG Cell Cycle; Reactome G2M v91; Hallmark G2M v2024.1	5.8253	5.671	4.9463	0.8988	0.4962	-1.395	0.6623	0.6935	0.2579
MCM2	DNA replication	KEGG Cell Cycle; Reactome G2M v91; Hallmark G2M v2024.1	6.1701	6.0982	5.7936	0.9158	0.4753	-1.3912	0.8159	0.8794	0.627
CDC20	APC/C activator	KEGG Cell Cycle; Reactome G2M v91; Hallmark G2M v2024.1	6.4158	6.3423	6.0592	0.9325	0.4546	-1.387	0.9253	0.9856	0.7427
BUB1	Spindle checkpoint	KEGG Cell Cycle; Reactome G2M v91; Hallmark G2M v2024.1	6.0027	5.7597	5.2399	1.0538	0.2899	-1.3437	0.7413	0.7321	0.3858
PLK1	Mitotic kinase	KEGG Cell Cycle; Reactome G2M v91; Hallmark G2M v2024.1	6.7416	6.4606	5.7785	1.0255	0.3306	-1.3561	1.0704	1.037	0.6204
NUSAP1	Spindle organization	KEGG Cell Cycle; Reactome G2M v91; Hallmark G2M v2024.1	6.9614	6.7264	6.1227	1.0131	0.348	-1.3611	1.1683	1.1526	0.7704
CDCA5	Cohesion	KEGG Cell Cycle; Reactome G2M v91; Hallmark G2M v2024.1	5.4883	5.342	5.1465	1.162	0.117	-1.2791	0.5122	0.5504	0.3451
MCM5	DNA replication	KEGG Cell Cycle; Reactome G2M v91; Hallmark G2M v2024.1	7.2672	6.8206	6.1301	1.1286	0.1738	-1.3024	1.3045	1.1936	0.7736
CENPE	Kinetochore motor	KEGG Cell Cycle; Reactome G2M v91; Hallmark G2M v2024.1	4.1562	3.8248	3.5886	1.2872	-0.1364	-1.1508	-0.0811	-0.1096	-0.3336
AURKA	Spindle assembly kinase	KEGG Cell Cycle; Reactome G2M v91; Hallmark G2M v2024.1	6.2458	5.785	5.4036	1.2614	-0.0769	-1.1845	0.8496	0.7431	0.4571
UBE2C	APC/C regulator	KEGG Cell Cycle; Reactome G2M v91; Hallmark G2M v2024.1	6.5491	6.2983	6.101	1.2704	-0.0972	-1.1733	0.9846	0.9664	0.7609
BUB1B	Spindle checkpoint	KEGG Cell Cycle; Reactome G2M v91; Hallmark G2M v2024.1	6.2091	5.1997	4.855	1.3711	-0.3856	-0.9855	0.8332	0.4885	0.2181
CDCA8	Chromosome segregation	KEGG Cell Cycle; Reactome G2M v91; Hallmark G2M v2024.1	5.2578	5.0678	5.0241	1.3922	-0.4808	-0.9114	0.4095	0.4311	0.2918
