# Supplementary material
Source: Research Square preprint supplement (doi:10.21203/rs.3.rs-9577216/v1)
Supplement: Supplementary file 8 [file 905cde9c9fe3b34c2bd763d8.xlsx]

## Sheet: INDEX
Supplementary Table 12. Stress-response gene signatures: expression and enrichment across MM27, MM13 and MM16 PDX models
Four stress-response signatures (ROS defense, Hypoxia/metabolic stress, UPRmt, UPRER). Cross-sample z-scores calculated gene-wise across three PDX models (Spearman, UPGMA clustering). Stress index = mean z-score per signature per PDX.
Sheet	Description	Genes/Rows	Notes
Stress_Signature_Heatmap	Gene-level annotations and cross-sample z-scores for all 4 stress-response signatures	99	Gene order: Spearman distance, average linkage (UPGMA). z-scores: gene-wise across MM27, MM13, MM16 (population SD).
Stress_Index	Mean z-score (stress index) per signature per PDX and dominant model	4	Stress index = (1/n) × Σ z_g,i across all genes in the signature.

## Sheet: Stress_Signature_Heatmap
Stress-response gene signatures | 4 signatures, 99 genes | Gene order: Spearman distance, average linkage (UPGMA) | Cross-sample z-scores
Cross-sample z-scores: gene-wise standardization across MM27, MM13 and MM16 using population SD. Colors reflect signature membership. MitoCarta annotation included where available.
Gene	Signature	GO term	Reactome pathway	Hallmark gene set	MitoCarta	MM27 log₂(TPM+1)	MM13 log₂(TPM+1)	MM16 log₂(TPM+1)	MM27 z-score	MM13 z-score	MM16 z-score
MSRA	ROS_defense	GO:0006979 response to oxidative stress	R-HSA-2559580 Oxidative Stress	HALLMARK_REACTIVE_OXYGEN_SPECIES_PATHWAY	MitoCarta – ROS detoxification	3.7115	4.0772	4.2802	-1.3236	0.2306	1.0931
PRDX5	ROS_defense	GO:0006979 response to oxidative stress	R-HSA-2559580 Oxidative Stress	HALLMARK_REACTIVE_OXYGEN_SPECIES_PATHWAY	MitoCarta – ROS detoxification	8.5908	9.4145	8.6596	-0.7973	1.4102	-0.6129
MGST1	ROS_defense	GO:0006979 response to oxidative stress	R-HSA-2559580 Oxidative Stress	HALLMARK_REACTIVE_OXYGEN_SPECIES_PATHWAY	MitoCarta – ROS detoxification	2.6736	7.1966	6.0041	-1.3677	0.9954	0.3723
GPX1	ROS_defense	GO:0006979 response to oxidative stress	R-HSA-2559580 Oxidative Stress	HALLMARK_REACTIVE_OXYGEN_SPECIES_PATHWAY	MitoCarta – ROS detoxification	7.9267	9.3167	8.2166	-0.9353	1.3863	-0.451
GPX4	ROS_defense	GO:0006979 response to oxidative stress	R-HSA-2559580 Oxidative Stress	HALLMARK_REACTIVE_OXYGEN_SPECIES_PATHWAY	MitoCarta – ROS detoxification	7.6842	8.3665	8.1922	-1.3708	0.9864	0.3844
SOD1	ROS_defense	GO:0006979 response to oxidative stress	R-HSA-2559580 Oxidative Stress	HALLMARK_REACTIVE_OXYGEN_SPECIES_PATHWAY	MitoCarta – ROS detoxification	9.2934	8.6657	9.4427	0.4738	-1.3909	0.9171
OXR1	ROS_defense	GO:0006979 response to oxidative stress	R-HSA-2559580 Oxidative Stress	HALLMARK_REACTIVE_OXYGEN_SPECIES_PATHWAY	MitoCarta – ROS detoxification	4.238	4.0815	5.9028	-0.61	-0.7999	1.41
NNT	ROS_defense	GO:0006979 response to oxidative stress	R-HSA-2559580 Oxidative Stress	HALLMARK_REACTIVE_OXYGEN_SPECIES_PATHWAY	MitoCarta – ROS detoxification	6.7014	5.9319	6.9318	0.4203	-1.3796	0.9592
MSRB3	ROS_defense	GO:0006979 response to oxidative stress	R-HSA-2559580 Oxidative Stress	HALLMARK_REACTIVE_OXYGEN_SPECIES_PATHWAY	MitoCarta – ROS detoxification	5.3799	4.2118	5.6235	0.5001	-1.3957	0.8955
MSRB2	ROS_defense	GO:0006979 response to oxidative stress	R-HSA-2559580 Oxidative Stress	HALLMARK_REACTIVE_OXYGEN_SPECIES_PATHWAY	MitoCarta – ROS detoxification	4.8919	4.1465	5.88	-0.1139	-1.1638	1.2777
MGST3	ROS_defense	GO:0006979 response to oxidative stress	R-HSA-2559580 Oxidative Stress	HALLMARK_REACTIVE_OXYGEN_SPECIES_PATHWAY	MitoCarta – ROS detoxification	7.4986	7.4068	8.0991	-0.5523	-0.8513	1.4036
GSTK1	ROS_defense	GO:0006979 response to oxidative stress	R-HSA-2559580 Oxidative Stress	HALLMARK_REACTIVE_OXYGEN_SPECIES_PATHWAY	MitoCarta – ROS detoxification	7.2395	6.493	7.3158	0.6018	-1.4092	0.8074
GLRX2	ROS_defense	GO:0006979 response to oxidative stress	R-HSA-2559580 Oxidative Stress	HALLMARK_REACTIVE_OXYGEN_SPECIES_PATHWAY	MitoCarta – ROS detoxification	4.8166	4.7142	6.0123	-0.6185	-0.7922	1.4107
GLRX5	ROS_defense	GO:0006979 response to oxidative stress	R-HSA-2559580 Oxidative Stress	HALLMARK_REACTIVE_OXYGEN_SPECIES_PATHWAY	MitoCarta – ROS detoxification	6.7807	6.7594	7.0733	-0.6315	-0.7801	1.4116
PRDX4	ROS_defense	GO:0006979 response to oxidative stress	R-HSA-2559580 Oxidative Stress	HALLMARK_REACTIVE_OXYGEN_SPECIES_PATHWAY	MitoCarta – ROS detoxification	9.1482	7.3929	7.7306	1.3908	-0.9174	-0.4733
PRDX2	ROS_defense	GO:0006979 response to oxidative stress	R-HSA-2559580 Oxidative Stress	HALLMARK_REACTIVE_OXYGEN_SPECIES_PATHWAY	MitoCarta – ROS detoxification	7.3682	5.6179	7.0862	0.8829	-1.3982	0.5153
HAGH	ROS_defense	GO:0006979 response to oxidative stress	R-HSA-2559580 Oxidative Stress	HALLMARK_REACTIVE_OXYGEN_SPECIES_PATHWAY	MitoCarta – ROS detoxification	6.1262	4.7506	5.4864	1.1953	-1.2522	0.0569
GSTZ1	ROS_defense	GO:0006979 response to oxidative stress	R-HSA-2559580 Oxidative Stress	HALLMARK_REACTIVE_OXYGEN_SPECIES_PATHWAY	MitoCarta – ROS detoxification	5.0687	4.0832	4.3154	1.3778	-0.9649	-0.4129
CAT	ROS_defense	GO:0006979 response to oxidative stress	R-HSA-2559580 Oxidative Stress	HALLMARK_REACTIVE_OXYGEN_SPECIES_PATHWAY	MitoCarta – ROS detoxification	6.9237	5.8953	6.8949	0.737	-1.4138	0.6768
GSR	ROS_defense	GO:0006979 response to oxidative stress	R-HSA-2559580 Oxidative Stress	HALLMARK_REACTIVE_OXYGEN_SPECIES_PATHWAY	MitoCarta – ROS detoxification	7.4141	5.6814	7.0566	0.9328	-1.3869	0.4541
SOD2	ROS_defense	GO:0006979 response to oxidative stress	R-HSA-2559580 Oxidative Stress	HALLMARK_REACTIVE_OXYGEN_SPECIES_PATHWAY	MitoCarta – ROS detoxification	6.4627	7.092	4.9841	0.3204	1.0327	-1.3531
TXNRD2	ROS_defense	GO:0006979 response to oxidative stress	R-HSA-2559580 Oxidative Stress	HALLMARK_REACTIVE_OXYGEN_SPECIES_PATHWAY	MitoCarta – ROS detoxification	4.99	4.7382	4.5065	1.2414	-0.034	-1.2074
TXNRD1	ROS_defense	GO:0006979 response to oxidative stress	R-HSA-2559580 Oxidative Stress	HALLMARK_REACTIVE_OXYGEN_SPECIES_PATHWAY	MitoCarta – ROS detoxification	9.1977	8.6477	8.0643	1.2125	0.0241	-1.2366
PRDX3	ROS_defense	GO:0006979 response to oxidative stress	R-HSA-2559580 Oxidative Stress	HALLMARK_REACTIVE_OXYGEN_SPECIES_PATHWAY	MitoCarta – ROS detoxification	7.7814	7.775	6.8807	0.7147	0.6995	-1.4142
PRDX6	ROS_defense	GO:0006979 response to oxidative stress	R-HSA-2559580 Oxidative Stress	HALLMARK_REACTIVE_OXYGEN_SPECIES_PATHWAY	MitoCarta – ROS detoxification	8.8392	8.3129	8.2854	1.4128	-0.6523	-0.7605
ACSS3	Hypoxia_metabolic_stress	GO:0001666 response to hypoxia	R-HSA-1234174 Cellular response to hypoxia	HALLMARK_HYPOXIA	MitoCarta – mitochondrial metabolism	0.1763	3.8817	0.4114	-0.7754	1.4119	-0.6366
VEGFA	Hypoxia_metabolic_stress	GO:0001666 response to hypoxia	R-HSA-1234174 Cellular response to hypoxia	HALLMARK_HYPOXIA	MitoCarta – mitochondrial metabolism	5.5214	7.5914	6.9758	-1.3536	1.0315	0.3222
SLC2A1	Hypoxia_metabolic_stress	GO:0001666 response to hypoxia	R-HSA-1234174 Cellular response to hypoxia	HALLMARK_HYPOXIA	MitoCarta – mitochondrial metabolism	5.2464	5.3143	6.7823	-0.7545	-0.6586	1.4131
PCK2	Hypoxia_metabolic_stress	GO:0001666 response to hypoxia	R-HSA-1234174 Cellular response to hypoxia	HALLMARK_HYPOXIA	MitoCarta – mitochondrial metabolism	3.8309	4.0418	4.7415	-0.9605	-0.4186	1.3792
EPAS1	Hypoxia_metabolic_stress	GO:0001666 response to hypoxia	R-HSA-1234174 Cellular response to hypoxia	HALLMARK_HYPOXIA	MitoCarta – mitochondrial metabolism	5.1223	5.7109	7.2507	-1.0093	-0.3533	1.3626
LDHA	Hypoxia_metabolic_stress	GO:0001666 response to hypoxia	R-HSA-1234174 Cellular response to hypoxia	HALLMARK_HYPOXIA	MitoCarta – mitochondrial metabolism	9.5259	9.8426	10.0286	-1.3162	0.21	1.1061
OXCT1	Hypoxia_metabolic_stress	GO:0001666 response to hypoxia	R-HSA-1234174 Cellular response to hypoxia	HALLMARK_HYPOXIA	MitoCarta – mitochondrial metabolism	5.5059	4.7252	5.8258	0.3323	-1.3566	1.0243
CPT1A	Hypoxia_metabolic_stress	GO:0001666 response to hypoxia	R-HSA-1234174 Cellular response to hypoxia	HALLMARK_HYPOXIA	MitoCarta – mitochondrial metabolism	3.8924	2.7991	6.4656	-0.321	-1.0323	1.3533
ACLY	Hypoxia_metabolic_stress	GO:0001666 response to hypoxia	R-HSA-1234174 Cellular response to hypoxia	HALLMARK_HYPOXIA	MitoCarta – mitochondrial metabolism	8.4192	7.2689	9.0021	0.2627	-1.3348	1.0721
ACSS1	Hypoxia_metabolic_stress	GO:0001666 response to hypoxia	R-HSA-1234174 Cellular response to hypoxia	HALLMARK_HYPOXIA	MitoCarta – mitochondrial metabolism	5.3736	0.3219	6.0501	0.5706	-1.4059	0.8353
SLC25A11	Hypoxia_metabolic_stress	GO:0001666 response to hypoxia	R-HSA-1234174 Cellular response to hypoxia	HALLMARK_HYPOXIA	MitoCarta – mitochondrial metabolism	7.323	5.6596	5.7913	1.4106	-0.7925	-0.6181
PGK1	Hypoxia_metabolic_stress	GO:0001666 response to hypoxia	R-HSA-1234174 Cellular response to hypoxia	HALLMARK_HYPOXIA	MitoCarta – mitochondrial metabolism	10.4089	9.1394	10.0743	0.9953	-1.3677	0.3725
PDK3	Hypoxia_metabolic_stress	GO:0001666 response to hypoxia	R-HSA-1234174 Cellular response to hypoxia	HALLMARK_HYPOXIA	MitoCarta – mitochondrial metabolism	4.4886	2.0531	3.4841	1.1474	-1.2897	0.1423
PDK1	Hypoxia_metabolic_stress	GO:0001666 response to hypoxia	R-HSA-1234174 Cellular response to hypoxia	HALLMARK_HYPOXIA	MitoCarta – mitochondrial metabolism	4.9514	3.5211	4.4647	1.0762	-1.3327	0.2565
MDH2	Hypoxia_metabolic_stress	GO:0001666 response to hypoxia	R-HSA-1234174 Cellular response to hypoxia	HALLMARK_HYPOXIA	MitoCarta – mitochondrial metabolism	9.5298	7.978	8.8447	1.1743	-1.2696	0.0954
LDHB	Hypoxia_metabolic_stress	GO:0001666 response to hypoxia	R-HSA-1234174 Cellular response to hypoxia	HALLMARK_HYPOXIA	MitoCarta – mitochondrial metabolism	10.7091	10.0486	10.2056	1.3771	-0.9672	-0.4099
GPD2	Hypoxia_metabolic_stress	GO:0001666 response to hypoxia	R-HSA-1234174 Cellular response to hypoxia	HALLMARK_HYPOXIA	MitoCarta – mitochondrial metabolism	5.9103	4.106	5.4601	0.98	-1.373	0.393
ACAT1	Hypoxia_metabolic_stress	GO:0001666 response to hypoxia	R-HSA-1234174 Cellular response to hypoxia	HALLMARK_HYPOXIA	MitoCarta – mitochondrial metabolism	6.7415	5.3114	6.0999	1.1807	-1.2645	0.0838
ENO1	Hypoxia_metabolic_stress	GO:0001666 response to hypoxia	R-HSA-1234174 Cellular response to hypoxia	HALLMARK_HYPOXIA	MitoCarta – mitochondrial metabolism	11.174	9.4294	10.5756	1.079	-1.3312	0.2522
SLC25A10	Hypoxia_metabolic_stress	GO:0001666 response to hypoxia	R-HSA-1234174 Cellular response to hypoxia	HALLMARK_HYPOXIA	MitoCarta – mitochondrial metabolism	6.3878	5.464	4.1906	1.1549	0.1294	-1.2843
BDH1	Hypoxia_metabolic_stress	GO:0001666 response to hypoxia	R-HSA-1234174 Cellular response to hypoxia	HALLMARK_HYPOXIA	MitoCarta – mitochondrial metabolism	3.853	3.406	1.8875	0.956	0.4246	-1.3805
HIF1A	Hypoxia_metabolic_stress	GO:0001666 response to hypoxia	R-HSA-1234174 Cellular response to hypoxia	HALLMARK_HYPOXIA	MitoCarta – mitochondrial metabolism	7.7838	7.1495	7.0741	1.4076	-0.5853	-0.8223
SLC25A1	Hypoxia_metabolic_stress	GO:0001666 response to hypoxia	R-HSA-1234174 Cellular response to hypoxia	HALLMARK_HYPOXIA	MitoCarta – mitochondrial metabolism	7.2331	7.3689	7.1425	-0.1618	1.2976	-1.1358
SLC2A3	Hypoxia_metabolic_stress	GO:0001666 response to hypoxia	R-HSA-1234174 Cellular response to hypoxia	HALLMARK_HYPOXIA	MitoCarta – mitochondrial metabolism	5.995	6.4739	5.9155	-0.5398	1.4019	-0.8621
HTRA2	UPRmt	GO:0035966 mitochondrial protein quality control	R-HSA-1268020 Mitochondrial protein import		MitoCarta – mitochondrial proteostasis	4.2994	5.1663	5.0435	-1.402	0.8613	0.5407
CLPB	UPRmt	GO:0035966 mitochondrial protein quality control	R-HSA-1268020 Mitochondrial protein import		MitoCarta – mitochondrial proteostasis	4.384	4.4867	4.1408	0.3231	1.0308	-1.3539
DNAJC15	UPRmt	GO:0035966 mitochondrial protein quality control	R-HSA-1268020 Mitochondrial protein import		MitoCarta – mitochondrial proteostasis	5.5279	5.9083	4.9616	0.1593	1.1373	-1.2966
IDE	UPRmt	GO:0035966 mitochondrial protein quality control	R-HSA-1268020 Mitochondrial protein import		MitoCarta – mitochondrial proteostasis	4.6982	4.2517	3.546	1.1235	0.1822	-1.3056
ATF5	UPRmt	GO:0035966 mitochondrial protein quality control	R-HSA-1268020 Mitochondrial protein import		MitoCarta – mitochondrial proteostasis	5.0828	5.0396	4.7517	0.849	0.555	-1.404
HSPD1	UPRmt	GO:0035966 mitochondrial protein quality control	R-HSA-1268020 Mitochondrial protein import		MitoCarta – mitochondrial proteostasis	9.7155	9.3667	8.7867	1.1117	0.2011	-1.3129
USP30	UPRmt	GO:0035966 mitochondrial protein quality control	R-HSA-1268020 Mitochondrial protein import		MitoCarta – mitochondrial proteostasis	4.1481	3.4751	3.9203	1.0744	-1.3336	0.2592
TRAP1	UPRmt	GO:0035966 mitochondrial protein quality control	R-HSA-1268020 Mitochondrial protein import		MitoCarta – mitochondrial proteostasis	7.8774	6.4065	6.8273	1.3586	-1.0195	-0.3391
SPG7	UPRmt	GO:0035966 mitochondrial protein quality control	R-HSA-1268020 Mitochondrial protein import		MitoCarta – mitochondrial proteostasis	6.0286	5.8074	5.8125	1.4139	-0.7319	-0.682
PITRM1	UPRmt	GO:0035966 mitochondrial protein quality control	R-HSA-1268020 Mitochondrial protein import		MitoCarta – mitochondrial proteostasis	6.7856	6.465	6.6298	1.2131	-1.2361	0.023
HSPE1	UPRmt	GO:0035966 mitochondrial protein quality control	R-HSA-1268020 Mitochondrial protein import		MitoCarta – mitochondrial proteostasis	8.2101	7.9389	8.0299	1.3352	-1.0713	-0.2638
DNAJA3	UPRmt	GO:0035966 mitochondrial protein quality control	R-HSA-1268020 Mitochondrial protein import		MitoCarta – mitochondrial proteostasis	6.7774	5.7393	6.4351	1.0653	-1.3382	0.2728
CLPX	UPRmt	GO:0035966 mitochondrial protein quality control	R-HSA-1268020 Mitochondrial protein import		MitoCarta – mitochondrial proteostasis	6.7219	5.3951	5.7425	1.3684	-0.9935	-0.3749
DDIT3	UPRmt	GO:0035966 mitochondrial protein quality control	R-HSA-1268020 Mitochondrial protein import		MitoCarta – mitochondrial proteostasis	7.5158	5.6885	6.942	1.0489	-1.3459	0.297
OMA1	UPRmt	GO:0035966 mitochondrial protein quality control	R-HSA-1268020 Mitochondrial protein import		MitoCarta – mitochondrial proteostasis	3.4764	4.2494	4.3399	-1.4078	0.5872	0.8205
YME1L1	UPRmt	GO:0035966 mitochondrial protein quality control	R-HSA-1268020 Mitochondrial protein import		MitoCarta – mitochondrial proteostasis	6.5696	6.6011	6.8683	-0.8216	-0.5861	1.4077
PARL	UPRmt	GO:0035966 mitochondrial protein quality control	R-HSA-1268020 Mitochondrial protein import		MitoCarta – mitochondrial proteostasis	6.8178	5.6531	6.8391	0.6878	-1.414	0.7263
NLN	UPRmt	GO:0035966 mitochondrial protein quality control	R-HSA-1268020 Mitochondrial protein import		MitoCarta – mitochondrial proteostasis	3.8125	3.3785	4.8405	-0.323	-1.0309	1.3539
LONP1	UPRmt	GO:0035966 mitochondrial protein quality control	R-HSA-1268020 Mitochondrial protein import		MitoCarta – mitochondrial proteostasis	6.7259	6.2662	6.8909	0.3715	-1.3675	0.996
LAP3	UPRmt	GO:0035966 mitochondrial protein quality control	R-HSA-1268020 Mitochondrial protein import		MitoCarta – mitochondrial proteostasis	6.5557	6.1963	6.681	0.3797	-1.3696	0.99
HSPA9	UPRmt	GO:0035966 mitochondrial protein quality control	R-HSA-1268020 Mitochondrial protein import		MitoCarta – mitochondrial proteostasis	8.5847	8.3996	8.7946	-0.0513	-1.1983	1.2496
GRPEL2	UPRmt	GO:0035966 mitochondrial protein quality control	R-HSA-1268020 Mitochondrial protein import		MitoCarta – mitochondrial proteostasis	4.0652	3.4738	4.1301	0.5944	-1.4085	0.8141
GRPEL1	UPRmt	GO:0035966 mitochondrial protein quality control	R-HSA-1268020 Mitochondrial protein import		MitoCarta – mitochondrial proteostasis	6.1556	5.9857	6.2255	0.331	-1.3562	1.0253
AFG3L2	UPRmt	GO:0035966 mitochondrial protein quality control	R-HSA-1268020 Mitochondrial protein import		MitoCarta – mitochondrial proteostasis	7.005	6.3827	7.2898	0.2969	-1.3459	1.049
CLPP	UPRmt	GO:0035966 mitochondrial protein quality control	R-HSA-1268020 Mitochondrial protein import		MitoCarta – mitochondrial proteostasis	6.4761	6.2673	6.9165	-0.2855	-1.0568	1.3423
XBP1	UPRER	GO:0030968 ER unfolded protein response	R-HSA-381119 Unfolded Protein Response	HALLMARK_UNFOLDED_PROTEIN_RESPONSE	Non‑MitoCarta ER stress module	8.1748	5.4983	7.046	1.1561	-1.2834	0.1273
PDIA6	UPRER	GO:0030968 ER unfolded protein response	R-HSA-381119 Unfolded Protein Response	HALLMARK_UNFOLDED_PROTEIN_RESPONSE	Non‑MitoCarta ER stress module	9.904	6.7808	8.9869	1.0275	-1.3553	0.3278
PDIA4	UPRER	GO:0030968 ER unfolded protein response	R-HSA-381119 Unfolded Protein Response	HALLMARK_UNFOLDED_PROTEIN_RESPONSE	Non‑MitoCarta ER stress module	9.9694	6.2568	8.0507	1.2382	-1.2108	-0.0275
HSPA5	UPRER	GO:0030968 ER unfolded protein response	R-HSA-381119 Unfolded Protein Response	HALLMARK_UNFOLDED_PROTEIN_RESPONSE	Non‑MitoCarta ER stress module	10.3647	8.5629	9.0299	1.3694	-0.9906	-0.3788
HSP90B1	UPRER	GO:0030968 ER unfolded protein response	R-HSA-381119 Unfolded Protein Response	HALLMARK_UNFOLDED_PROTEIN_RESPONSE	Non‑MitoCarta ER stress module	12.0125	8.7576	10.8426	1.0956	-1.3222	0.2266
HERPUD1	UPRER	GO:0030968 ER unfolded protein response	R-HSA-381119 Unfolded Protein Response	HALLMARK_UNFOLDED_PROTEIN_RESPONSE	Non‑MitoCarta ER stress module	7.3835	5.5214	7.2353	0.793	-1.4106	0.6176
ERN1	UPRER	GO:0030968 ER unfolded protein response	R-HSA-381119 Unfolded Protein Response	HALLMARK_UNFOLDED_PROTEIN_RESPONSE	Non‑MitoCarta ER stress module	2.9011	1.9449	2.7463	0.8837	-1.398	0.5143
EDEM2	UPRER	GO:0030968 ER unfolded protein response	R-HSA-381119 Unfolded Protein Response	HALLMARK_UNFOLDED_PROTEIN_RESPONSE	Non‑MitoCarta ER stress module	5.7835	4.9155	5.384	1.191	-1.2559	0.065
DNAJC3	UPRER	GO:0030968 ER unfolded protein response	R-HSA-381119 Unfolded Protein Response	HALLMARK_UNFOLDED_PROTEIN_RESPONSE	Non‑MitoCarta ER stress module	6.7872	4.5254	6.6154	0.789	-1.4109	0.6219
DDIT3	UPRER	GO:0030968 ER unfolded protein response	R-HSA-381119 Unfolded Protein Response	HALLMARK_UNFOLDED_PROTEIN_RESPONSE	Non‑MitoCarta ER stress module	7.5158	5.6885	6.942	1.0489	-1.3459	0.297
CANX	UPRER	GO:0030968 ER unfolded protein response	R-HSA-381119 Unfolded Protein Response	HALLMARK_UNFOLDED_PROTEIN_RESPONSE	Non‑MitoCarta ER stress module	9.8258	8.5001	9.8071	0.7221	-1.4141	0.692
CALR	UPRER	GO:0030968 ER unfolded protein response	R-HSA-381119 Unfolded Protein Response	HALLMARK_UNFOLDED_PROTEIN_RESPONSE	Non‑MitoCarta ER stress module	11.6525	9.4304	11.1894	0.9351	-1.3864	0.4513
ATF4	UPRER	GO:0030968 ER unfolded protein response	R-HSA-381119 Unfolded Protein Response	HALLMARK_UNFOLDED_PROTEIN_RESPONSE	Non‑MitoCarta ER stress module	9.298	8.6336	9.2133	0.8457	-1.4045	0.5588
ATF6	UPRER	GO:0030968 ER unfolded protein response	R-HSA-381119 Unfolded Protein Response	HALLMARK_UNFOLDED_PROTEIN_RESPONSE	Non‑MitoCarta ER stress module	5.5407	4.6753	5.3896	0.8978	-1.3952	0.4974
PPP1R15A	UPRER	GO:0030968 ER unfolded protein response	R-HSA-381119 Unfolded Protein Response	HALLMARK_UNFOLDED_PROTEIN_RESPONSE	Non‑MitoCarta ER stress module	6.6929	8.0332	8.5414	-1.3632	0.3557	1.0075
EDEM1	UPRER	GO:0030968 ER unfolded protein response	R-HSA-381119 Unfolded Protein Response	HALLMARK_UNFOLDED_PROTEIN_RESPONSE	Non‑MitoCarta ER stress module	5.3234	5.4812	5.8542	-1.0314	-0.3222	1.3536
ERO1L	UPRER	GO:0030968 ER unfolded protein response	R-HSA-381119 Unfolded Protein Response	HALLMARK_UNFOLDED_PROTEIN_RESPONSE	Non‑MitoCarta ER stress module	6.1767	6.192	6.4566	-0.7657	-0.6468	1.4125
TRIB3	UPRER	GO:0030968 ER unfolded protein response	R-HSA-381119 Unfolded Protein Response	HALLMARK_UNFOLDED_PROTEIN_RESPONSE	Non‑MitoCarta ER stress module	5.84	5.1089	6.4039	0.105	-1.2739	1.1689
SYVN1	UPRER	GO:0030968 ER unfolded protein response	R-HSA-381119 Unfolded Protein Response	HALLMARK_UNFOLDED_PROTEIN_RESPONSE	Non‑MitoCarta ER stress module	5.6786	5.671	6.1148	-0.6886	-0.7254	1.4141
SEL1L	UPRER	GO:0030968 ER unfolded protein response	R-HSA-381119 Unfolded Protein Response	HALLMARK_UNFOLDED_PROTEIN_RESPONSE	Non‑MitoCarta ER stress module	5.5759	5.2578	6.592	-0.4089	-0.968	1.3769
EIF2AK3	UPRER	GO:0030968 ER unfolded protein response	R-HSA-381119 Unfolded Protein Response	HALLMARK_UNFOLDED_PROTEIN_RESPONSE	Non‑MitoCarta ER stress module	4.1318	3.8258	4.477	-0.0493	-1.1994	1.2486
EDEM3	UPRER	GO:0030968 ER unfolded protein response	R-HSA-381119 Unfolded Protein Response	HALLMARK_UNFOLDED_PROTEIN_RESPONSE	Non‑MitoCarta ER stress module	5.1942	4.3498	5.6247	0.2605	-1.334	1.0735
DNAJB9	UPRER	GO:0030968 ER unfolded protein response	R-HSA-381119 Unfolded Protein Response	HALLMARK_UNFOLDED_PROTEIN_RESPONSE	Non‑MitoCarta ER stress module	4.8807	4.2876	5.4182	0.0401	-1.2443	1.2042
ASNS	UPRER	GO:0030968 ER unfolded protein response	R-HSA-381119 Unfolded Protein Response	HALLMARK_UNFOLDED_PROTEIN_RESPONSE	Non‑MitoCarta ER stress module	4.8374	3.4725	5.3923	0.3347	-1.3573	1.0226
ATF3	UPRER	GO:0030968 ER unfolded protein response	R-HSA-381119 Unfolded Protein Response	HALLMARK_UNFOLDED_PROTEIN_RESPONSE	Non‑MitoCarta ER stress module	4.3937	4.1326	5.0076	-0.3206	-1.0325	1.3532

## Sheet: Stress_Index
Stress Index per signature per PDX — mean cross-sample z-score across genes in each signature
Stress index = (1/n) × Σ z_g,i, where z_g,i is the cross-sample z-score for gene g in PDX i. Higher values indicate greater relative activation of the stress program in that model. Dominant PDX = model with highest mean z-score for that signature.
Signature	N genes	MM27 mean z-score	MM13 mean z-score	MM16 mean z-score	Dominant PDX
ROS_defense	25	0.2037	-0.4487	0.245	MM16
Hypoxia_metabolic_stress	24	0.3297	-0.5094	0.1798	MM27
UPRmt	25	0.4726	-0.666	0.1934	MM27
UPRER	25	0.4042	-1.1333	0.7291	MM16
