# Supplementary material
Source: Research Square preprint supplement (doi:10.21203/rs.3.rs-9577216/v1)
Supplement: Supplementary file 10 [file a7f13f1f2a68d266106db45d.xlsx]

## Sheet: INDEX
Supplementary Table 9. MM27/MM13 Common DEGs - EnrichR Pathway Analysis (Vol+Aur vs DMSO)
Sheet	Database	Direction	Total pathways	Significant (adj.p<0.05)
Common_DEG_UP	Common DEG list	Upregulated	130
Common_DEG_DN	Common DEG list	Downregulated	60
Reactome_UP	Reactome Pathways 2024	Upregulated	512	32
WikiPathways_UP	WikiPathways 2024 Human	Upregulated	285	57
KEGG_UP	KEGG 2021 Human	Upregulated	157	20
MSigDB_Hallmark_UP	MSigDB Hallmark 2020	Upregulated	40	15
NCI_Nature_DN	NCI-Nature 2016	Downregulated	34	6
KEA_DN	KEA 2015	Downregulated	54	8
GO_BioProcess_DN	GO Biological Process 2025	Downregulated	542	40
ARCHS4_Kinases_DN	ARCHS4 Kinases Coexpression	Downregulated	230	33

## Sheet: Common_DEG_UP
MM27/MM13 Common Upregulated DEGs Vol.+Aur. vs DMSO | log2FC > 1
Total common genes: 130 | Sorted by MM27 log2FC
Gene	MM27 log2FC	MM27 Adj P-value	MM13 log2FC	MM13 Adj P-value
HMOX1	7.5087	7.85894e-297	5.1394	1e-197
ANXA10	7.1069	5.62857e-16	1.954	0.00537237
AKR1C3	6.3293	2.30377e-12	1.6099	2.69954e-17
AKR1C7P	6.0632	2.60149e-18	1.9274	2.0249e-15
AKR1C1	4.9096	7.44052e-14	3.3616	1.03607e-99
LINC00942	4.8576	4.45123e-07	4.2161	2.03178e-08
HTRA3	4.7507	1.50422e-34	1.8213	0.00296256
AFP	4.5872	4.2541e-22	2.0216	9.09314e-09
TUBA4A	4.1217	9.48338e-81	2.3363	1.44584e-38
LUCAT1	4.0578	1.52294e-63	2.0971	2.67652e-08
CCL26	4.017	5.55314e-09	1.6862	1.14819e-10
OSGIN1	3.9964	6.49392e-16	1.8174	1.22401e-10
UCHL1	3.6847	3.71635e-12	5.7966	8.59289e-05
HSPB1	3.4872	7.00607e-16	1.2529	0.000273937
SERPINE1	3.4336	8.47695e-71	1.1888	3.64128e-30
SLC12A8	3.3177	6.5842e-37	1.3489	4.66984e-06
STYK1	3.3074	5.18657e-21	2.2797	2.78913e-23
CXCL8	3.2936	4.72602e-45	4.8197	4.26094e-122
GCNT3	3.0487	7.28498e-47	3.4833	2.11954e-23
LOC105374811	2.9621	3.61245e-08	2.8329	5.64666e-19
SPAG4	2.815	1.44866e-09	1.3444	0.00127504
MAP3K14	2.7411	3.0114e-19	1.0877	0.00035088
REX1BD	2.7187	7.55757e-09	1.0489	0.00783885
LIN7B	2.716	8.19183e-13	1.5178	0.000259115
NECAB3	2.7116	2.84368e-19	1.0486	4.61934e-05
GCLM	2.6476	1.56366e-240	1.7897	1.70108e-96
NFKB2	2.5918	2.24427e-33	1.6382	3.85394e-27
SQSTM1	2.5866	5.69745e-36	1.3336	2.04845e-35
BIRC3	2.5676	1.67468e-21	3.1273	1.30579e-74
LIMD2	2.5511	4.4753e-16	1.4387	6.47398e-06
SRXN1	2.5333	8.67837e-154	1.4222	1.54061e-61
SLC7A11	2.5	3.91055e-139	3.2414	9.77583e-197
JUNB	2.4475	4.04317e-10	1.4557	3.59309e-06
TRIM16L	2.445	3.11133e-49	2.7914	2.98848e-93
SDSL	2.4313	3.0265e-09	1.0551	1.34084e-05
UNKL	2.3927	1.04376e-42	1.3364	2.21043e-08
TRIM16	2.3889	3.67413e-58	2.1637	2.53964e-98
LINC02806	2.3662	7.37901e-07	2.7528	0.000824488
ALKBH6	2.3554	2.4538e-22	1.1299	2.56104e-10
POR	2.3398	1.55169e-14	1.1676	9.44229e-19
SERTAD1	2.2817	9.67137e-20	1.2303	1.29776e-12
TRIM47	2.2739	5.51705e-09	1.0081	4.10431e-07
RAB43P1	2.2419	1.45511e-06	1.2441	0.000332882
SLC48A1	2.1747	8.08627e-24	1.1198	5.47717e-16
ADRM1	2.1736	8.24933e-10	1.1211	1.30344e-09
IL1B	2.1609	6.27713e-08	1.4831	4.14296e-36
FTLP3	2.1591	2.76903e-18	1.4828	9.64185e-15
LOC105371967	2.141	9.94531e-16	3.155	0.000984177
ABHD4	2.1089	6.13819e-22	1.0108	2.57669e-06
ANKRD39	2.1084	2.6883e-17	1.365	1.55933e-06
NMRAL2P	2.0966	5.19928e-57	4.4243	3.85561e-30
MIR193BHG	2.0857	5.62226e-27	1.8316	2.74183e-05
ST6GALNAC4	2.0702	1.17344e-07	1.5228	6.53726e-10
CD82	2.0652	5.33578e-10	1.1195	2.53138e-22
TFEC	2.0284	7.99235e-07	1.6899	8.46203e-05
FTH1P12	2.0057	3.04266e-06	1.1675	0.0014322
GLA	1.998	5.13385e-55	1.8746	5.24832e-40
RELB	1.9931	1.56718e-17	2.3424	2.9112e-14
TOM1	1.9863	9.96797e-08	1.0547	1.54067e-11
CHPF2	1.9687	8.79665e-22	1.0847	9.98676e-14
LOC107985423	1.9641	2.63714e-19	2.4315	0.00308716
TM4SF19	1.9372	0.000116921	1.0826	1.00953e-05
ABCC2	1.9241	3.70967e-33	1.3546	3.11993e-11
FTLP2	1.8937	2.34039e-17	1.2348	8.6744e-07
ZMAT5	1.8668	1.13181e-10	1.0383	2.72992e-07
LINC02535	1.8374	4.85855e-07	1.2391	4.02752e-20
TALDO1	1.836	1.91841e-20	1.279	1.62349e-59
TPRA1	1.8026	2.31403e-10	1.0787	9.34185e-22
CRISPLD2	1.8026	6.67148e-06	1.5685	1.07204e-07
KCNE4	1.8024	2.53958e-59	2.0607	4.0465e-39
B3GAT3	1.7354	1.87501e-06	1.0212	0.0046076
KYNU	1.734	8.61337e-50	2.3718	6.60054e-83
LURAP1L-AS1	1.7288	0.000161228	2.5509	1.21182e-06
SLC6A6	1.7286	4.01332e-32	1.0548	1.2826e-09
FTL	1.724	9.36785e-14	1.627	4.47195e-80
CLIC2	1.7237	0.000168373	1.8916	2.152e-05
PHLDB3	1.715	1.5201e-06	1.0097	0.00508077
SNORA52	1.6964	0.00404503	1.0167	0.00364996
NUPR1	1.6694	5.90353e-10	2.19	8.93443e-30
DLGAP1-AS2	1.6323	9.38007e-21	1.2473	0.00023197
PTGR1	1.6255	1.19652e-31	1.0108	2.55102e-22
HSPB8	1.6231	7.21577e-64	1.6827	9.80119e-09
MAP3K10	1.5965	0.00147874	1.2471	0.000143827
RAB5IF	1.5956	2.5278e-19	1.3418	2.21022e-16
LOC107984551	1.5827	3.66443e-10	2.3531	0.000251952
LINC00520	1.5816	2.10991e-16	1.4894	1.65499e-39
SPP1	1.5704	6.20821e-48	2.0302	4.84523e-67
ATP6V0B	1.5655	1.32686e-10	1.028	7.37273e-07
LOC112268219	1.557	0.000810508	1.7576	0.00485196
CPT1C	1.5545	0.00116794	1.018	0.00159186
IL13RA2	1.5481	4.67102e-06	1.1626	1.00321e-07
LOC105374027	1.5129	5.40995e-06	3.3298	3.71206e-05
SERPINB2	1.4716	3.62289e-17	1.4378	2.76723e-21
BCAS4	1.4713	4.6441e-09	1.119	6.30751e-06
BRF2	1.467	5.40685e-10	1.4029	3.48707e-15
LOC105371267	1.4631	0.000179115	2.2185	2.54316e-05
GADD45B	1.449	5.13104e-05	1.1085	2.42054e-11
CXCL2	1.4417	0.00355649	2.6525	0.0014632
MLLT11	1.4138	7.61445e-44	2.5324	9.19612e-44
SYNGR2	1.408	1.63837e-05	1.2853	1.14605e-13
ZFAND2A	1.3714	1.5624e-27	3.1293	1.2273e-67
FBXO6	1.3599	2.49206e-06	1.0323	6.04119e-07
TIMP1	1.3502	1.49964e-07	1.7715	2.97956e-50
GSR	1.3465	6.28094e-85	1.1247	3.17285e-35
NFKBIA	1.3437	6.99366e-16	1.349	4.81324e-49
SLC1A5	1.3258	1.66244e-11	1.3513	3.58719e-20
GSTM3	1.2846	3.48735e-15	1.2479	2.48958e-31
PRNP	1.278	5.6659e-54	1.0463	1.52655e-36
CIDECP1	1.266	2.52878e-07	1.2823	0.00115532
COL27A1	1.264	0.000304205	1.2455	1.03424e-10
GLRX	1.251	1.46315e-12	1.4436	2.26139e-25
TXNRD1	1.2375	1.86949e-77	1.2841	1.7172e-56
PRDX1P1	1.2374	1.05176e-05	1.4879	6.17614e-06
SLC3A2	1.236	2.67953e-11	1.2615	3.03616e-40
RPP25L	1.2266	9.21593e-07	1.2052	1.54255e-11
C1S	1.2245	1.38377e-31	1.2235	7.52998e-26
ID3	1.1836	9.26589e-06	1.41	3.4291e-06
TRAF1	1.1739	8.80518e-06	2.2779	1.03349e-35
GABARAPL1	1.1229	2.83569e-29	1.3801	1.04104e-24
SNORA74B	1.0984	0.00439883	1.0428	0.000416694
BEX2	1.0828	0.00175565	1.016	6.95983e-10
CCL20	1.0733	0.00323122	2.4339	1.25031e-05
PPP4R1L	1.0723	0.00210939	1.0101	0.00421946
MAP3K2-DT	1.0584	8.64975e-05	2.4228	9.44843e-08
LOC105378179	1.0441	0.00265649	1.0576	0.00502995
BATF2	1.0365	3.80841e-08	1.3407	6.1369e-05
NFKBIB	1.023	0.00107352	1.1766	4.03031e-06
DNAJB4	1.0201	4.91028e-10	1.2973	8.54062e-10
TRIB3	1.0189	1.01079e-07	1.7388	2.21931e-41
PCOLCE2	1.0043	5.36228e-18	1.3232	3.80396e-09

## Sheet: Common_DEG_DN
MM27/MM13 Common Downregulated DEGs Vol.+Aur. vs DMSO | log2FC < -1
Total common genes: 60 | Sorted by MM27 log2FC
Gene	MM27 log2FC	MM27 Adj P-value	MM13 log2FC	MM13 Adj P-value
PLCXD3	-2.9943	1.46277e-13	-1.7032	3.67714e-23
NEURL1B	-2.9308	2.54766e-14	-3.2572	8.25157e-24
PAK3	-2.8814	1.90306e-09	-1.0301	1.49176e-19
PIGAP1	-2.6891	1.71634e-12	-1.8885	0.00155496
MKI67	-2.5173	5.82073e-08	-2.0293	7.42692e-05
ABCB5	-2.3119	4.72403e-21	-1.4873	0.000137137
STARD4-AS1	-2.1592	3.60765e-13	-1.8908	6.99621e-05
CENPF	-1.9236	1.25685e-54	-1.6106	1.07358e-44
MYB	-1.9075	1.83283e-07	-2.3079	1.22819e-05
KIF20A	-1.8369	1.10164e-67	-2.2573	1.26002e-60
HMCN1	-1.8192	3.11241e-22	-1.0156	1.25679e-07
KIT	-1.7878	2.14843e-16	-3.4791	6.62706e-22
E2F8	-1.7792	9.65963e-16	-3.058	1.00865e-12
MTSS1	-1.7753	8.58412e-10	-1.1635	2.81236e-06
C2orf88	-1.7575	8.99484e-18	-1.1416	4.86206e-09
UGT8	-1.6987	6.60317e-54	-1.6381	7.2532e-08
KCNK2	-1.5842	9.65963e-16	-1.3723	8.25022e-09
NREP	-1.5348	6.91178e-63	-1.0661	1.49453e-13
DLGAP5	-1.5013	7.66481e-30	-1.9172	9.11706e-33
MBNL3	-1.4846	3.85627e-12	-1.0529	1.69676e-06
TOP2A	-1.477	5.11664e-40	-1.8595	4.64776e-54
SEMA3D	-1.4521	5.90727e-14	-1.2174	0.000219098
GLI3	-1.433	0.00132186	-1.5866	7.42692e-05
LRATD2	-1.3907	8.18734e-23	-1.513	2.28899e-56
CENPA	-1.3886	3.44034e-34	-1.7969	2.58155e-33
CKAP2	-1.3769	2.18779e-23	-1.3099	9.25354e-37
LOC112268301	-1.3591	2.45924e-05	-1.3018	0.000213882
NFIB	-1.3554	1.75397e-08	-1.2139	1.65579e-10
TPX2	-1.3303	8.16797e-22	-1.4942	4.71355e-24
RCAN2	-1.3281	2.02938e-08	-1.2533	4.95391e-05
PEG10	-1.3218	5.22193e-08	-1.4905	5.82496e-14
HNRNPA1	-1.2476	4.45497e-11	-1.1043	1.08438e-09
CELF2	-1.2461	3.88923e-11	-1.7545	0.0013105
ASPM	-1.2431	5.18598e-16	-2.2082	1.20009e-86
KCTD12	-1.2402	1.53922e-13	-1.3011	2.01747e-18
GAS2L3	-1.2258	7.03988e-37	-1.0065	8.79046e-27
GPSM2	-1.2158	8.81961e-27	-1.519	2.17149e-34
SYNE2	-1.2034	1.38158e-10	-2.0497	3.63725e-33
LRRC8C	-1.1524	9.22705e-08	-1.225	8.84167e-12
ZNF704	-1.1375	2.21758e-11	-1.491	1.26119e-08
CCNA2	-1.1364	1.07996e-17	-1.9863	7.12861e-45
B3GALT1	-1.1297	2.11166e-16	-1.0528	7.82419e-05
HMGB3	-1.1206	2.00128e-26	-1.5288	2.96787e-30
IGFBP5	-1.098	3.2469e-10	-1.4076	4.91955e-10
RTKN2	-1.0891	5.44638e-10	-1.9621	1.64217e-35
GAS5-AS1	-1.085	1.06154e-05	-1.0197	0.00949869
HAS3	-1.0818	0.00232913	-1.8762	1.58594e-08
FAM81A	-1.0803	1.52944e-09	-1.2569	6.77638e-11
PLK1	-1.0607	5.97162e-06	-2.1909	7.76577e-23
RAD21	-1.0532	1.2128e-11	-1.0459	3.87787e-25
ARL6IP1	-1.053	7.03121e-22	-1.0941	2.4152e-27
HAS2	-1.0526	6.51313e-15	-1.5237	1.80236e-40
CRISPLD1	-1.0475	4.39147e-13	-1.0324	3.25395e-09
RPS6KA5	-1.0453	9.84866e-15	-1.0427	3.37718e-05
MYH10	-1.0432	1.1492e-09	-1.2123	2.98245e-07
ELOVL2	-1.029	1.35924e-23	-1.7938	1.18532e-63
PER3	-1.0259	1.16384e-06	-1.3895	2.00638e-06
DACT1	-1.0171	2.84775e-09	-1.0832	0.00025861
LMNB1	-1.0157	9.35626e-45	-2.1446	8.83356e-60
FAM83D	-1.0149	3.29917e-14	-1.7887	2.07153e-42

## Sheet: Reactome_UP
Reactome Pathways 2024 | Common Upregulated DEGs (MM27 & MM13) | Sorted by Adjusted P-value | Bold = shown in figure
Top 20 sig. → orange | Other sig. → yellow | Bold = in figure (6) | Significant (adj.p<0.05): 32/512
Term	Overlap	Overlap (%)	P-value	Adjusted P-value	Odds Ratio	Combined Score	Genes
NFE2L2 Regulating Anti-Oxidant Detoxification Enzymes	6/19	31.58	1.69938e-09	8.70081e-07	73.9094	1492.45	SRXN1;TXNRD1;GSR;HMOX1;SLC7A11;GCLM
Nuclear Events Mediated by NFE2L2	9/87	10.34	5.23648e-09	1.34054e-06	18.8735	359.873	SRXN1;TXNRD1;ADRM1;GSR;TALDO1;HMOX1;SLC7A11;GCLM;SQSTM1
KEAP1-NFE2L2 Pathway	9/119	7.56	8.29319e-08	1.41537e-05	13.3614	217.861	SRXN1;TXNRD1;ADRM1;GSR;TALDO1;HMOX1;SLC7A11;GCLM;SQSTM1
Signaling by Interleukins	15/452	3.32	2.55869e-07	3.27512e-05	5.8003	88.0407	CXCL8;SERPINB2;CCL20;ADRM1;TALDO1;CXCL2;NFKB2;NFKBIA;IL1B;HMOX1;TIMP1;IL13RA2;JUNB;SQSTM1;NFKBIB
Cytokine Signaling in Immune System	19/776	2.45	6.5042e-07	6.6603e-05	4.3218	61.5667	CXCL8;SERPINB2;CCL20;ADRM1;TALDO1;CXCL2;TUBA4A;NFKB2;RELB;NFKBIA;IL1B;HMOX1;TIMP1;IL13RA2;JUNB;SQSTM1;MAP3K14;NFKBIB;BIRC3
Cellular Response to Chemical Stress	9/202	4.46	7.02484e-06	0.000599453	7.5833	89.984	SRXN1;TXNRD1;GSR;ADRM1;TALDO1;HMOX1;SLC7A11;GCLM;SQSTM1
Interleukin-10 Signaling	5/46	10.87	1.18882e-05	0.000869534	19.3454	219.376	CXCL8;CCL20;IL1B;TIMP1;CXCL2
CLEC7A (Dectin-1) Signaling	6/87	6.9	2.20424e-05	0.00141071	11.8214	126.755	NFKBIA;IL1B;ADRM1;MAP3K14;RELB;NFKB2
Interleukin-1 Signaling	6/102	5.88	5.4289e-05	0.00308494	9.9667	97.8852	NFKBIA;IL1B;ADRM1;SQSTM1;NFKB2;NFKBIB
Amino Acid Transport Across the Plasma Membrane	4/33	12.12	6.02527e-05	0.00308494	21.7198	211.05	SLC6A6;SLC3A2;SLC1A5;SLC7A11
Interleukin-4 and Interleukin-13 Signaling	6/112	5.36	9.14856e-05	0.00425824	9.0219	83.8977	CXCL8;IL1B;HMOX1;TIMP1;IL13RA2;JUNB
RIP-mediated NFkB Activation via ZBP1	3/17	17.65	0.0001707	0.00728321	33.5028	290.657	NFKBIA;NFKB2;NFKBIB
C-type Lectin Receptors (CLRs)	6/131	4.58	0.000216161	0.00823208	7.6432	64.5049	NFKBIA;IL1B;ADRM1;MAP3K14;NFKB2;RELB
NIK-->noncanonical NF-kB Signaling	4/46	8.7	0.000225096	0.00823208	14.9872	125.877	ADRM1;MAP3K14;RELB;NFKB2
Immune System	28/2150	1.3	0.000247536	0.00844923	2.2959	19.0654	CXCL8;C1S;CXCL2;RELB;TOM1;HMOX1;FBXO6;TIMP1;IL13RA2;JUNB;UNKL;ATP6V0B;SERPINB2;CCL20;ADRM1;TALDO1;TUBA4A;NFKB2;NFKBIA;CRISPLD2;IL1B;TRIB3;SQSTM1;MAP3K14;GLA;FTL;NFKBIB;BIRC3
TNFR2 Non-Canonical NF-kB Pathway	5/88	5.68	0.000273258	0.00867074	9.5359	78.243	ADRM1;MAP3K14;BIRC3;RELB;NFKB2
Dectin-1 Mediated Noncanonical NF-kB Signaling	4/49	8.16	0.000287896	0.00867074	13.9859	114.026	ADRM1;MAP3K14;RELB;NFKB2
Interleukin-1 Family Signaling	6/140	4.29	0.000309442	0.0088019	7.1266	57.5884	NFKBIA;IL1B;ADRM1;SQSTM1;NFKB2;NFKBIB
ZBP1(DAI) Mediated Induction of Type I IFNs	3/21	14.29	0.000327583	0.00882749	26.0525	209.039	NFKBIA;NFKB2;NFKBIB
TRAF6 Mediated NF-kB Activation	3/25	12	0.000555841	0.0142295	21.3114	159.729	NFKBIA;NFKB2;NFKBIB
Cellular Responses to Stress	14/787	1.78	0.000609138	0.0148514	2.9816	22.0745	ATP6V0B;CXCL8;SRXN1;HSPB8;TXNRD1;GSR;ADRM1;TALDO1;SLC7A11;TUBA4A;HMOX1;TRIB3;GCLM;SQSTM1
Cellular Responses to Stimuli	15/887	1.69	0.000653032	0.0149378	2.8417	20.841	ATP6V0B;CXCL8;SRXN1;HSPB8;TXNRD1;GSR;ADRM1;TALDO1;SLC7A11;TUBA4A;NFKBIA;HMOX1;TRIB3;GCLM;SQSTM1
Cell Recruitment (Pro-Inflammatory Response)	3/27	11.11	0.00070021	0.0149378	19.5335	141.894	IL1B;HMOX1;NFKB2
Purinergic Signaling in Leishmaniasis Infection	3/27	11.11	0.00070021	0.0149378	19.5335	141.894	IL1B;HMOX1;NFKB2
IkBA Variant Leads to EDA-ID	2/7	28.57	0.000861841	0.0176505	62.0781	438.051	NFKBIA;NFKB2
Interconversion of Nucleotide Di- and Triphosphates	3/30	10	0.000958193	0.018869	17.3605	120.663	TXNRD1;GSR;GLRX
Interleukin-1 Processing	2/9	22.22	0.0014649	0.0277788	44.3371	289.342	IL1B;NFKB2
SUMOylation of Immune Response Proteins	2/12	16.67	0.00265156	0.0484857	31.0312	184.096	NFKBIA;NFKB2
TAK1-dependent IKK and NF-kappa-B Activation	3/45	6.67	0.00311969	0.0499258	11.1519	64.3464	NFKBIA;NFKB2;NFKBIB
NF-kB Is Activated and Signals Survival	2/13	15.38	0.00312036	0.0499258	28.2088	162.759	NFKBIA;SQSTM1
Dissolution of Fibrin Clot	2/13	15.38	0.00312036	0.0499258	28.2088	162.759	SERPINB2;SERPINE1
Synthesis of Bile Acids and Bile Salts via 24-Hydroxycholesterol	2/13	15.38	0.00312036	0.0499258	28.2088	162.759	AKR1C1;AKR1C3
Synthesis of Bile Acids and Bile Salts via 27-Hydroxycholesterol	2/14	14.29	0.00362498	0.0545879	25.8568	145.313	AKR1C1;AKR1C3
Tryptophan Catabolism	2/14	14.29	0.00362498	0.0545879	25.8568	145.313	KYNU;SLC3A2
p75NTR Signals via NF-kB	2/16	12.5	0.00473974	0.0667966	22.1607	118.599	NFKBIA;SQSTM1
Heme Degradation	2/16	12.5	0.00473974	0.0667966	22.1607	118.599	ABCC2;HMOX1
Toll Like Receptor 3 (TLR3) Cascade	4/106	3.77	0.00507994	0.0667966	6.1525	32.5003	NFKBIA;NFKB2;NFKBIB;BIRC3
Activation of NF-kappaB in B Cells	3/54	5.56	0.00522682	0.0667966	9.1797	48.2298	NFKBIA;ADRM1;NFKBIB
Transport of Inorganic Cations Anions and Amino Acids Oligopeptides	4/107	3.74	0.00525111	0.0667966	6.0925	31.9813	SLC6A6;SLC3A2;SLC1A5;SLC7A11
TNF Receptor Superfamily (TNFSF) Members Mediating Non-Canonical NF-kB Pathway	2/17	11.76	0.00534895	0.0667966	20.6823	108.186	MAP3K14;BIRC3
The NLRP3 Inflammasome	2/17	11.76	0.00534895	0.0667966	20.6823	108.186	HMOX1;NFKB2
MyD88-independent TLR4 Cascade	4/110	3.64	0.00578772	0.0689143	5.9191	30.4955	NFKBIA;NFKB2;NFKBIB;BIRC3
TRIF (TICAM1)-mediated TLR4 Signaling	4/110	3.64	0.00578772	0.0689143	5.9191	30.4955	NFKBIA;NFKB2;NFKBIB;BIRC3
Chemokine Receptors Bind Chemokines	3/57	5.26	0.00607944	0.0707426	8.6684	44.2336	CXCL8;CCL20;CXCL2
Iron Uptake and Transport	3/59	5.08	0.00669132	0.0761324	8.358	41.848	ATP6V0B;HMOX1;FTL
Nucleotide-binding Domain, Leucine Rich Repeat Containing Receptor (NLR) Signaling Pathways	3/61	4.92	0.00733857	0.0816814	8.069	39.6558	HMOX1;BIRC3;NFKB2
Innate Immune System	15/1149	1.31	0.00771972	0.0840957	2.155	10.4821	ATP6V0B;C1S;ADRM1;NFKB2;RELB;NFKBIA;CRISPLD2;IL1B;TOM1;HMOX1;MAP3K14;GLA;FTL;NFKBIB;BIRC3
Cytosolic Sensors of Pathogen-Associated DNA	3/64	4.69	0.00837678	0.0893523	7.671	36.6848	NFKBIA;NFKB2;NFKBIB
Insertion of Tail-Anchored Proteins Into the Endoplasmic Reticulum Membrane	2/22	9.09	0.0088948	0.0929416	15.5078	73.2324	PRNP;HMOX1
Synthesis of Bile Acids and Bile Salts via 7Alpha-Hydroxycholesterol	2/23	8.7	0.00970078	0.0992772	14.7686	68.4606	AKR1C1;AKR1C3
Downstream Signaling Events of B Cell Receptor (BCR)	3/68	4.41	0.00988894	0.0992772	7.1975	33.2259	NFKBIA;ADRM1;NFKBIB
CD28 Dependent PI3K Akt Signaling	2/24	8.33	0.010538	0.103759	14.0966	64.1785	TRIB3;MAP3K14
Basigin Interactions	2/25	8	0.011406	0.108146	13.483	60.3178	SLC3A2;SLC7A11
Inflammasomes	2/25	8	0.011406	0.108146	13.483	60.3178	HMOX1;NFKB2
Metabolism of Porphyrins	2/28	7.14	0.0141906	0.132102	11.9255	50.745	ABCC2;HMOX1
Toll Like Receptor 4 (TLR4) Cascade	4/148	2.7	0.0159487	0.145817	4.3488	17.9968	NFKBIA;NFKB2;NFKBIB;BIRC3
DDX58 IFIH1-mediated Induction of Interferon-Alpha Beta	3/86	3.49	0.0185654	0.165618	5.6314	22.4495	NFKBIA;NFKB2;NFKBIB
Death Receptor Signaling	4/157	2.55	0.019369	0.165618	4.0911	16.1356	NFKBIA;TRAF1;SQSTM1;BIRC3
Synthesis of Bile Acids and Bile Salts	2/33	6.06	0.0194084	0.165618	9.9995	39.4185	AKR1C1;AKR1C3
TNFR1-induced NF-kappa-B Signaling Pathway	2/33	6.06	0.0194084	0.165618	9.9995	39.4185	TRAF1;BIRC3
Transport of Small Molecules	10/724	1.38	0.0198217	0.166372	2.2358	8.7664	SLC6A6;ATP6V0B;ABCC2;ADRM1;HMOX1;SLC3A2;SLC1A5;SLC7A11;CLIC2;FTL
CD28 Co-Stimulation	2/35	5.71	0.0216879	0.173503	9.3925	35.9827	TRIB3;MAP3K14
Diseases Associated With the TLR Signaling Cascade	2/35	5.71	0.0216879	0.173503	9.3925	35.9827	NFKBIA;NFKB2
Diseases of Immune System	2/35	5.71	0.0216879	0.173503	9.3925	35.9827	NFKBIA;NFKB2
Detoxification of Reactive Oxygen Species	2/36	5.56	0.0228673	0.177395	9.1158	34.4399	TXNRD1;GSR
SMAD2 SMAD3 SMAD4 Heterotrimer Regulates Transcription	2/36	5.56	0.0228673	0.177395	9.1158	34.4399	SERPINE1;JUNB
Gene and Protein Expression by JAK-STAT Signaling After Interleukin-12 Stimulation	2/37	5.41	0.0240727	0.180058	8.8549	32.9994	SERPINB2;TALDO1
Glutathione Conjugation	2/37	5.41	0.0240727	0.180058	8.8549	32.9994	GSTM3;GCLM
Metabolism	22/2181	1.01	0.0242656	0.180058	1.671	6.2141	GSTM3;ABCC2;ABHD4;CHPF2;B3GAT3;TXNRD1;AKR1C1;GSR;ADRM1;AKR1C3;TALDO1;SLC3A2;GLRX;SDSL;PTGR1;POR;KYNU;HMOX1;TRIB3;GCLM;GLA;RAB5IF
MyD88 Cascade Initiated on Plasma Membrane	3/98	3.06	0.0260945	0.183019	4.9171	17.928	NFKBIA;NFKB2;NFKBIB
Toll Like Receptor 10 (TLR10) Cascade	3/98	3.06	0.0260945	0.183019	4.9171	17.928	NFKBIA;NFKB2;NFKBIB
Toll Like Receptor 5 (TLR5) Cascade	3/98	3.06	0.0260945	0.183019	4.9171	17.928	NFKBIA;NFKB2;NFKBIB
Metabolism of Nucleotides	3/98	3.06	0.0260945	0.183019	4.9171	17.928	TXNRD1;GSR;GLRX
NGF-stimulated Transcription	2/39	5.13	0.0265596	0.183763	8.3754	30.3891	ID3;JUNB
Toll-like Receptor Cascades	4/174	2.3	0.0269895	0.184249	3.6788	13.289	NFKBIA;NFKB2;NFKBIB;BIRC3
TRAF6 Mediated Induction of NFkB and MAP Kinases Upon TLR7 8 or 9 Activation	3/102	2.94	0.0289165	0.194603	4.7175	16.7157	NFKBIA;NFKB2;NFKBIB
MyD88 Dependent Cascade Initiated on Endosome	3/103	2.91	0.0296463	0.194603	4.6701	16.4313	NFKBIA;NFKB2;NFKBIB
Metabolism of Amino Acids and Derivatives	6/358	1.68	0.0296465	0.194603	2.683	9.4399	KYNU;TXNRD1;GSR;ADRM1;SLC3A2;SDSL
Assembly and Cell Surface Presentation of NMDA Receptors	2/43	4.65	0.0318279	0.200006	7.5568	26.0513	LIN7B;TUBA4A
Regulation of HMOX1 Expression and Activity	1/5	20	0.0320832	0.200006	38.5	132.418	HMOX1
Threonine Catabolism	1/5	20	0.0320832	0.200006	38.5	132.418	SDSL
Post-translational Protein Phosphorylation	3/107	2.8	0.0326625	0.200006	4.4896	15.3611	SPP1;TIMP1;AFP
Toll Like Receptor 7 8 (TLR7 8) Cascade	3/107	2.8	0.0326625	0.200006	4.4896	15.3611	NFKBIA;NFKB2;NFKBIB
Bile Acid and Bile Salt Metabolism	2/44	4.55	0.0332042	0.200006	7.3765	25.1175	AKR1C1;AKR1C3
Retinoid Metabolism and Transport	2/44	4.55	0.0332042	0.200006	7.3765	25.1175	AKR1C1;AKR1C3
Toll Like Receptor 9 (TLR9) Cascade	3/110	2.73	0.0350259	0.208526	4.363	14.6234	NFKBIA;NFKB2;NFKBIB
Interleukin-12 Signaling	2/46	4.35	0.0360254	0.212011	7.0405	23.3993	SERPINB2;TALDO1
Biosynthesis of Lipoxins (LX)	1/6	16.67	0.0383762	0.213276	30.7984	100.413	PTGR1
CLEC7A Inflammasome Pathway	1/6	16.67	0.0383762	0.213276	30.7984	100.413	IL1B
RUNX3 Regulates Immune Response and Cell Migration	1/6	16.67	0.0383762	0.213276	30.7984	100.413	SPP1
Uptake and Function of Diphtheria Toxin	1/6	16.67	0.0383762	0.213276	30.7984	100.413	TXNRD1
Metabolism of Fat-Soluble Vitamins	2/48	4.17	0.0389357	0.213276	6.7337	21.8565	AKR1C1;AKR1C3
MyD88 MAL(TIRAP) Cascade Initiated on Plasma Membrane	3/115	2.61	0.0391562	0.213276	4.1672	13.5025	NFKBIA;NFKB2;NFKBIB
Toll Like Receptor TLR6 TLR2 Cascade	3/115	2.61	0.0391562	0.213276	4.1672	13.5025	NFKBIA;NFKB2;NFKBIB
Toll Like Receptor 2 (TLR2) Cascade	3/118	2.54	0.0417482	0.219075	4.0579	12.8882	NFKBIA;NFKB2;NFKBIB
Toll Like Receptor TLR1 TLR2 Cascade	3/118	2.54	0.0417482	0.219075	4.0579	12.8882	NFKBIA;NFKB2;NFKBIB
Chondroitin Sulfate Dermatan Sulfate Metabolism	2/50	4	0.0419323	0.219075	6.4525	20.4653	CHPF2;B3GAT3
Regulation of TNFR1 Signaling	2/50	4	0.0419323	0.219075	6.4525	20.4653	TRAF1;BIRC3
Transcriptional Activity of SMAD2 SMAD3 SMAD4 Heterotrimer	2/51	3.92	0.0434622	0.224774	6.3205	19.8201	SERPINE1;JUNB
DEx H-box Helicases Activate Type I IFN and Inflammatory Cytokines Production	1/7	14.29	0.0446286	0.228499	25.6641	79.7994	NFKB2
Extracellular Matrix Organization	5/300	1.67	0.04636	0.235013	2.6542	8.152	COL27A1;PCOLCE2;SERPINE1;SPP1;TIMP1
Regulation of IGF Transport and Uptake by Insulin-like Growth Factor Binding Proteins (IGFBPs)	3/124	2.42	0.0471846	0.236848	3.8555	11.7734	SPP1;TIMP1;AFP
NFE2L2 Regulates Pentose Phosphate Pathway Genes	1/8	12.5	0.0508407	0.250703	21.9967	65.5294	TALDO1
Platelet Degranulation	3/128	2.34	0.0509933	0.250703	3.7313	11.1047	SERPINE1;TIMP1;TUBA4A
Interleukin-12 Family Signaling	2/56	3.57	0.0514138	0.250703	5.7338	17.017	SERPINB2;TALDO1
Response to Elevated Platelet Cytosolic Ca2+	3/133	2.26	0.0559577	0.262978	3.5869	10.3417	SERPINE1;TIMP1;TUBA4A
Arachidonate Metabolism	2/59	3.39	0.056415	0.262978	5.4312	15.6148	AKR1C3;PTGR1
TNF Signaling	2/59	3.39	0.056415	0.262978	5.4312	15.6148	TRAF1;BIRC3
Atorvastatin ADME	1/9	11.11	0.0570127	0.262978	19.2461	55.1302	ABCC2
Phase 3 - Rapid Repolarisation	1/9	11.11	0.0570127	0.262978	19.2461	55.1302	KCNE4
RHO GTPases Activate Rhotekin and Rhophilins	1/9	11.11	0.0570127	0.262978	19.2461	55.1302	LIN7B
Nuclear Events (Kinase and Transcription Factor Activation)	2/61	3.28	0.05984	0.271133	5.2466	14.7747	ID3;JUNB
Regulated Necrosis	2/61	3.28	0.05984	0.271133	5.2466	14.7747	IL1B;BIRC3
Prednisone ADME	1/10	10	0.0631449	0.278708	17.1068	47.2545	AKR1C1
Maturation of Protein 3A 9683673	1/10	10	0.0631449	0.278708	17.1068	47.2545	ST6GALNAC4
Maturation of Protein 3A 9694719	1/10	10	0.0631449	0.278708	17.1068	47.2545	ST6GALNAC4
Macroautophagy	3/143	2.1	0.0665466	0.285427	3.329	9.0212	GABARAPL1;SQSTM1;TUBA4A
ABC Transporter Disorders	2/65	3.08	0.066897	0.285427	4.9125	13.2862	ABCC2;ADRM1
O-linked Glycosylation of Mucins	2/65	3.08	0.066897	0.285427	4.9125	13.2862	GCNT3;ST6GALNAC4
The Role of GTSE1 in G2 M Progression After G2 Checkpoint	2/65	3.08	0.066897	0.285427	4.9125	13.2862	ADRM1;TUBA4A
Pexophagy	1/11	9.09	0.0692375	0.29057	15.3953	41.1089	SQSTM1
TGFBR3 PTM Regulation	1/11	9.09	0.0692375	0.29057	15.3953	41.1089	TIMP1
Collagen Biosynthesis and Modifying Enzymes	2/67	2.99	0.0705245	0.293565	4.7608	12.6247	COL27A1;PCOLCE2
SLC-mediated Transmembrane Transport	4/249	1.61	0.0795344	0.3284	2.5429	6.4376	SLC6A6;SLC3A2;SLC1A5;SLC7A11
p75NTR Recruits Signalling Complexes	1/13	7.69	0.0813049	0.330382	12.8282	32.1929	SQSTM1
Glutathione Synthesis and Recycling	1/13	7.69	0.0813049	0.330382	12.8282	32.1929	GCLM
SARS-CoV-1 Infection	3/157	1.91	0.0827797	0.333726	3.0242	7.5351	NFKBIA;SERPINE1;ST6GALNAC4
Autophagy	3/158	1.9	0.0839991	0.335997	3.0046	7.4422	GABARAPL1;SQSTM1;TUBA4A
Signaling by TGFB Family Members	3/161	1.86	0.0877037	0.348095	2.9471	7.1726	SERPINE1;TIMP1;JUNB
Signaling by the B Cell Receptor (BCR)	3/162	1.85	0.0889537	0.350341	2.9284	7.0856	NFKBIA;ADRM1;NFKBIB
Disorders of Transmembrane Transporters	3/164	1.83	0.0914764	0.350935	2.8917	6.9161	ABCC2;ADRM1;SLC3A2
Costimulation by the CD28 Family	2/78	2.56	0.0915416	0.350935	4.0695	9.73	TRIB3;MAP3K14
Pentose Phosphate Pathway	1/15	6.67	0.0932172	0.350935	10.9945	26.0879	TALDO1
Phase 2 - Plateau Phase	1/15	6.67	0.0932172	0.350935	10.9945	26.0879	KCNE4
Response of EIF2AK1 (HRI) to Heme Deficiency	1/15	6.67	0.0932172	0.350935	10.9945	26.0879	TRIB3
Synthesis of Prostaglandins (PG) and Thromboxanes (TX)	1/15	6.67	0.0932172	0.350935	10.9945	26.0879	AKR1C3
Deubiquitination	4/268	1.49	0.0976184	0.364204	2.3576	5.4855	NFKBIA;UCHL1;ADRM1;BIRC3
NRIF Signals Cell Death From the Nucleus	1/16	6.25	0.0991157	0.364204	10.261	23.7179	SQSTM1
Signaling by Insulin Receptor	2/82	2.44	0.099587	0.364204	3.8652	8.916	ATP6V0B;TRIB3
UCH Proteinases	2/82	2.44	0.099587	0.364204	3.8652	8.916	UCHL1;ADRM1
Regulation of MITF-M-dependent Genes Involved in Lysosome Biogenesis and Autophagy	1/17	5.88	0.104976	0.38119	9.6192	21.6819	ATP6V0B
TP53 Regulates Metabolic Genes	2/86	2.33	0.107822	0.386049	3.6804	8.1973	TXNRD1;GSR
Transcriptional Regulation by RUNX3	2/86	2.33	0.107822	0.386049	3.6804	8.1973	ADRM1;SPP1
Selective Autophagy	2/89	2.25	0.114114	0.390028	3.553	7.7119	SQSTM1;TUBA4A
ABC-family Proteins Mediated Transport	2/90	2.22	0.116232	0.390028	3.5124	7.5593	ABCC2;ADRM1
Collagen Formation	2/90	2.22	0.116232	0.390028	3.5124	7.5593	COL27A1;PCOLCE2
Na+ Cl- Dependent Neurotransmitter Transporters	1/19	5.26	0.116584	0.390028	8.5495	18.3742	SLC6A6
Biosynthesis of Specialized Proresolving Mediators (SPMs)	1/19	5.26	0.116584	0.390028	8.5495	18.3742	PTGR1
SARS-CoV-1 Targets Host Intracellular Signalling and Regulatory Pathways	1/19	5.26	0.116584	0.390028	8.5495	18.3742	SERPINE1
Scavenging by Class A Receptors	1/19	5.26	0.116584	0.390028	8.5495	18.3742	FTL
TICAM1, RIP1-mediated IKK Complex Recruitment	1/19	5.26	0.116584	0.390028	8.5495	18.3742	BIRC3
Microtubule-dependent Trafficking of Connexons From Golgi to the Plasma Membrane	1/19	5.26	0.116584	0.390028	8.5495	18.3742	TUBA4A
Chaperonin-mediated Protein Folding	2/91	2.2	0.11836	0.390028	3.4728	7.411	FBXO6;TUBA4A
Downstream TCR Signaling	2/91	2.2	0.11836	0.390028	3.4728	7.411	NFKBIA;ADRM1
Chondroitin Sulfate Biosynthesis	1/20	5	0.122331	0.390028	8.0991	17.0165	CHPF2
Defective B3GAT3 Causes JDSSDHD	1/20	5	0.122331	0.390028	8.0991	17.0165	B3GAT3
Synthesis of Leukotrienes (LT) and Eoxins (EX)	1/20	5	0.122331	0.390028	8.0991	17.0165	PTGR1
Transport of Connexons to the Plasma Membrane	1/20	5	0.122331	0.390028	8.0991	17.0165	TUBA4A
Activation of NMDA Receptors and Postsynaptic Events	2/93	2.15	0.122646	0.390028	3.3961	7.1266	LIN7B;TUBA4A
Signaling by ALK Fusions and Activated Point Mutants	2/93	2.15	0.122646	0.390028	3.3961	7.1266	JUNB;SQSTM1
Signaling by ALK in Cancer	2/93	2.15	0.122646	0.390028	3.3961	7.1266	JUNB;SQSTM1
Signaling by TGF-beta Receptor Complex	2/94	2.13	0.124803	0.394438	3.359	6.9902	SERPINE1;JUNB
Ub-specific Processing Proteases	3/190	1.58	0.126814	0.398336	2.4864	5.1345	NFKBIA;ADRM1;BIRC3
CD209 (DC-SIGN) Signaling	1/21	4.76	0.128042	0.399741	7.6938	15.8138	RELB
Protein Folding	2/97	2.06	0.131327	0.407513	3.2525	6.6027	FBXO6;TUBA4A
P75 NTR Receptor-Mediated Signalling	2/98	2.04	0.13352	0.407514	3.2184	6.4803	NFKBIA;SQSTM1
Post-chaperonin Tubulin Folding Pathway	1/22	4.55	0.133716	0.407514	7.3271	14.7423	TUBA4A
RA Biosynthesis Pathway	1/22	4.55	0.133716	0.407514	7.3271	14.7423	AKR1C3
Hedgehog 'Off' State	2/99	2.02	0.13572	0.408758	3.1851	6.3611	ADRM1;TUBA4A
Visual Phototransduction	2/99	2.02	0.13572	0.408758	3.1851	6.3611	AKR1C1;AKR1C3
Signaling by Receptor Tyrosine Kinases	6/536	1.12	0.136895	0.409884	1.7657	3.5111	ATP6V0B;COL27A1;SPP1;ID3;TRIB3;JUNB
Peptide Ligand-Binding Receptors	3/198	1.52	0.138547	0.410049	2.3834	4.7109	CXCL8;CCL20;CXCL2
Dopamine Neurotransmitter Release Cycle	1/23	4.35	0.139353	0.410049	6.9937	13.7827	LIN7B
IKK Complex Recruitment Mediated by RIP1	1/23	4.35	0.139353	0.410049	6.9937	13.7827	BIRC3
Programmed Cell Death	3/202	1.49	0.144549	0.422908	2.335	4.5163	IL1B;ADRM1;BIRC3
Formation of Tubulin Folding Intermediates by CCT TriC	1/25	4	0.150518	0.43787	6.4102	12.1388	TUBA4A
Post-translational Protein Modification	13/1457	0.89	0.152251	0.440409	1.4178	2.6687	ADRM1;AFP;TUBA4A;NFKB2;NFKBIA;UCHL1;SPP1;GCNT3;FBXO6;TIMP1;SQSTM1;ST6GALNAC4;BIRC3
A Tetrasaccharide Linker Sequence Is Required for GAG Synthesis	1/26	3.85	0.156046	0.443865	6.1535	11.4307	B3GAT3
TNFR1-induced Proapoptotic Signaling	1/26	3.85	0.156046	0.443865	6.1535	11.4307	BIRC3
Termination of O-glycan Biosynthesis	1/26	3.85	0.156046	0.443865	6.1535	11.4307	ST6GALNAC4
Drug ADME	2/109	1.83	0.158145	0.447348	2.886	5.3224	ABCC2;AKR1C1
Prefoldin Mediated Transfer of Substrate to CCT TriC	1/27	3.7	0.161539	0.45083	5.9165	10.7859	TUBA4A
Pyroptosis	1/27	3.7	0.161539	0.45083	5.9165	10.7859	IL1B
Phase II - Conjugation of Compounds	2/111	1.8	0.162711	0.45083	2.8327	5.1436	GSTM3;GCLM
SARS-CoV-1-host Interactions	2/112	1.79	0.165003	0.45083	2.8068	5.0573	NFKBIA;SERPINE1
ATF4 Activates Genes in Response to Endoplasmic Reticulum Stress	1/28	3.57	0.166996	0.45083	5.6971	10.1966	CXCL8
Activation of AMPK Downstream of NMDARs	1/28	3.57	0.166996	0.45083	5.6971	10.1966	TUBA4A
BMAL1 CLOCK,NPAS2 Activates Circadian Gene Expression	1/28	3.57	0.166996	0.45083	5.6971	10.1966	SERPINE1
RNA Polymerase III Transcription Initiation From Type 3 Promoter	1/28	3.57	0.166996	0.45083	5.6971	10.1966	BRF2
TCR Signaling	2/113	1.77	0.1673	0.45083	2.7814	4.973	NFKBIA;ADRM1
O-linked Glycosylation	2/114	1.75	0.169604	0.454645	2.7564	4.8907	GCNT3;ST6GALNAC4
Signaling by NTRK1 (TRKA)	2/115	1.74	0.171913	0.455043	2.7319	4.8102	ID3;JUNB
Acyl Chain Remodelling of PE	1/29	3.45	0.172419	0.455043	5.4934	9.6564	ABHD4
VEGFR2 Mediated Vascular Permeability	1/29	3.45	0.172419	0.455043	5.4934	9.6564	TRIB3
Biological Oxidations	3/222	1.35	0.175758	0.457448	2.1196	3.6853	GSTM3;POR;GCLM
PPARA Activates Gene Expression	2/117	1.71	0.176546	0.457448	2.6841	4.6547	TXNRD1;TRIB3
Paracetamol ADME	1/30	3.33	0.177806	0.457448	5.3037	9.1598	ABCC2
Insulin Receptor Recycling	1/30	3.33	0.177806	0.457448	5.3037	9.1598	ATP6V0B
MET Activates PTK2 Signaling	1/30	3.33	0.177806	0.457448	5.3037	9.1598	COL27A1
Regulation of Lipid Metabolism by PPARalpha	2/119	1.68	0.181199	0.457448	2.638	4.506	TXNRD1;TRIB3
RHO GTPases Activate IQGAPs	1/31	3.23	0.183158	0.457448	5.1266	8.7019	TUBA4A
Downregulation of SMAD2 3 SMAD4 Transcriptional Activity	1/31	3.23	0.183158	0.457448	5.1266	8.7019	SERPINE1
Sealing of the Nuclear Envelope (NE) by ESCRT-III	1/31	3.23	0.183158	0.457448	5.1266	8.7019	TUBA4A
Transferrin Endocytosis and Recycling	1/31	3.23	0.183158	0.457448	5.1266	8.7019	ATP6V0B
Turbulent Flow Shear Stress Activates Signaling by PIEZO1 and Integrins in Endothelial Cells	1/31	3.23	0.183158	0.457448	5.1266	8.7019	NFKBIA
Selenoamino Acid Metabolism	2/122	1.64	0.188212	0.46172	2.5716	4.2951	TXNRD1;GSR
PINK1-PRKN Mediated Mitophagy	1/32	3.12	0.188476	0.46172	4.961	8.2788	SQSTM1
Cooperation of Prefoldin and TriC CCT in Actin and Tubulin Folding	1/32	3.12	0.188476	0.46172	4.961	8.2788	TUBA4A
Regulation of Necroptotic Cell Death	1/32	3.12	0.188476	0.46172	4.961	8.2788	BIRC3
Adaptive Immune System	8/854	0.94	0.192227	0.465749	1.4746	2.4317	NFKBIA;ADRM1;FBXO6;TRIB3;MAP3K14;UNKL;TUBA4A;NFKBIB
Activation of Matrix Metalloproteinases	1/33	3.03	0.193759	0.465749	4.8057	7.8869	TIMP1
PERK Regulates Gene Expression	1/33	3.03	0.193759	0.465749	4.8057	7.8869	CXCL8
Sialic Acid Metabolism	1/33	3.03	0.193759	0.465749	4.8057	7.8869	ST6GALNAC4
Neddylation	3/234	1.28	0.195316	0.467299	2.0083	3.2798	ADRM1;FBXO6;SQSTM1
RIPK1-mediated Regulated Necrosis	1/34	2.94	0.199008	0.468664	4.6599	7.5229	BIRC3
Diseases of Carbohydrate Metabolism	1/34	2.94	0.199008	0.468664	4.6599	7.5229	TALDO1
Metabolic Disorders of Biological Oxidation Enzymes	1/34	2.94	0.199008	0.468664	4.6599	7.5229	GCLM
Glycosaminoglycan Metabolism	2/127	1.57	0.199983	0.468664	2.4681	3.9725	CHPF2;B3GAT3
Nuclear Events Stimulated by ALK Signaling in Cancer	1/35	2.86	0.204224	0.468664	4.5226	7.1843	JUNB
Translation of Structural Proteins 9683701	1/35	2.86	0.204224	0.468664	4.5226	7.1843	ST6GALNAC4
Cardiac Conduction	2/130	1.54	0.207087	0.468664	2.4099	3.7947	KCNE4;CLIC2
RNA Polymerase III Transcription Initiation	1/36	2.78	0.209405	0.468664	4.3931	6.8686	BRF2
ROS and RNS Production in Phagocytes	1/36	2.78	0.209405	0.468664	4.3931	6.8686	ATP6V0B
Parasitic Infection Pathways	3/245	1.22	0.213695	0.468664	1.9159	2.9567	IL1B;HMOX1;NFKB2
Leishmania Infection	3/245	1.22	0.213695	0.468664	1.9159	2.9567	IL1B;HMOX1;NFKB2
NOD1 2 Signaling Pathway	1/37	2.7	0.214553	0.468664	4.2709	6.5737	BIRC3
Cross-presentation of Soluble Exogenous Antigens (Endosomes)	1/37	2.7	0.214553	0.468664	4.2709	6.5737	ADRM1
RHOH GTPase Cycle	1/37	2.7	0.214553	0.468664	4.2709	6.5737	SLC1A5
Regulation of Activated PAK-2p34 by Proteasome Mediated Degradation	1/37	2.7	0.214553	0.468664	4.2709	6.5737	ADRM1
Gap Junction Assembly	1/37	2.7	0.214553	0.468664	4.2709	6.5737	TUBA4A
HSF1-dependent Transactivation	1/37	2.7	0.214553	0.468664	4.2709	6.5737	HSPB8
Signaling by NTRKs	2/134	1.49	0.216601	0.468664	2.3364	3.574	ID3;JUNB
Regulation of Ornithine Decarboxylase (ODC)	1/38	2.63	0.219668	0.468664	4.1552	6.2979	ADRM1
Maturation of Spike Protein 9694548	1/38	2.63	0.219668	0.468664	4.1552	6.2979	ST6GALNAC4
Signaling by Hedgehog	2/136	1.47	0.221373	0.468664	2.3013	3.4702	ADRM1;TUBA4A
MITF-M-regulated Melanocyte Development	2/136	1.47	0.221373	0.468664	2.3013	3.4702	ATP6V0B;TFEC
Metabolism of Lipids	7/758	0.92	0.223662	0.468664	1.4488	2.1698	ABHD4;TXNRD1;AKR1C1;AKR1C3;TRIB3;PTGR1;GLA
Mitophagy	1/39	2.56	0.22475	0.468664	4.0457	6.0393	SQSTM1
p53-Independent DNA Damage Response	1/39	2.56	0.22475	0.468664	4.0457	6.0393	ADRM1
p53-Independent G1 S DNA Damage Checkpoint	1/39	2.56	0.22475	0.468664	4.0457	6.0393	ADRM1
Association of TriC CCT With Target Proteins During Biosynthesis	1/39	2.56	0.22475	0.468664	4.0457	6.0393	FBXO6
Autodegradation of the E3 Ubiquitin Ligase COP1	1/39	2.56	0.22475	0.468664	4.0457	6.0393	ADRM1
Glycosphingolipid Catabolism	1/39	2.56	0.22475	0.468664	4.0457	6.0393	GLA
Ubiquitin Mediated Degradation of Phosphorylated Cdc25A	1/39	2.56	0.22475	0.468664	4.0457	6.0393	ADRM1
Ubiquitin-dependent Degradation of Cyclin D	1/39	2.56	0.22475	0.468664	4.0457	6.0393	ADRM1
Regulation of Apoptosis	1/40	2.5	0.229799	0.468664	3.9418	5.7966	ADRM1
Vpu Mediated Degradation of CD4	1/40	2.5	0.229799	0.468664	3.9418	5.7966	ADRM1
Degradation of the Extracellular Matrix	2/140	1.43	0.230943	0.468664	2.2341	3.2743	SPP1;TIMP1
RNA Polymerase III Abortive And Retractive Initiation	1/41	2.44	0.234815	0.468664	3.843	5.5684	BRF2
RNA Polymerase III Transcription	1/41	2.44	0.234815	0.468664	3.843	5.5684	BRF2
Diseases Associated With Glycosaminoglycan Metabolism	1/41	2.44	0.234815	0.468664	3.843	5.5684	B3GAT3
Signaling by Retinoic Acid	1/41	2.44	0.234815	0.468664	3.843	5.5684	AKR1C3
MET Promotes Cell Motility	1/41	2.44	0.234815	0.468664	3.843	5.5684	COL27A1
AUF1 (hnRNP D0) Binds and Destabilizes mRNA	1/42	2.38	0.239799	0.468664	3.7491	5.3535	ADRM1
NCAM1 Interactions	1/42	2.38	0.239799	0.468664	3.7491	5.3535	PRNP
Degradation of AXIN	1/42	2.38	0.239799	0.468664	3.7491	5.3535	ADRM1
FBXL7 Down-Regulates AURKA During Mitotic Entry and in Early Mitosis	1/42	2.38	0.239799	0.468664	3.7491	5.3535	ADRM1
SCF-beta-TrCP Mediated Degradation of Emi1	1/42	2.38	0.239799	0.468664	3.7491	5.3535	ADRM1
GSK3B and BTRC CUL1-mediated-degradation of NFE2L2	1/42	2.38	0.239799	0.468664	3.7491	5.3535	ADRM1
Vif-mediated Degradation of APOBEC3G	1/42	2.38	0.239799	0.468664	3.7491	5.3535	ADRM1
Platelet Activation, Signaling and Aggregation	3/262	1.15	0.242775	0.468664	1.7886	2.532	SERPINE1;TIMP1;TUBA4A
Aggrephagy	1/43	2.33	0.244751	0.468664	3.6597	5.151	TUBA4A
Aspirin ADME	1/43	2.33	0.244751	0.468664	3.6597	5.151	ABCC2
Hh Mutants Are Degraded by ERAD	1/43	2.33	0.244751	0.468664	3.6597	5.151	ADRM1
Diseases of Metabolism	3/264	1.14	0.246241	0.468664	1.7747	2.4872	B3GAT3;TALDO1;GCLM
FCERI Mediated NF-kB Activation	2/147	1.36	0.247749	0.468664	2.1255	2.9658	NFKBIA;ADRM1
Negative Regulation of NOTCH4 Signaling	1/44	2.27	0.24967	0.468664	3.5744	4.9598	ADRM1
PI3K Cascade	1/44	2.27	0.24967	0.468664	3.5744	4.9598	TRIB3
Collagen Chain Trimerization	1/44	2.27	0.24967	0.468664	3.5744	4.9598	COL27A1
Degradation of DVL	1/44	2.27	0.24967	0.468664	3.5744	4.9598	ADRM1
Stabilization of P53	1/44	2.27	0.24967	0.468664	3.5744	4.9598	ADRM1
Uptake and Actions of Bacterial Toxins	1/44	2.27	0.24967	0.468664	3.5744	4.9598	TXNRD1
Signal Transduction	20/2613	0.77	0.249893	0.468664	1.2114	1.6799	ATP6V0B;COL27A1;CXCL8;CCL20;SERPINE1;ADRM1;AKR1C3;SLC1A5;TRAF1;LIN7B;CXCL2;TUBA4A;NFKBIA;SPP1;ID3;TRIB3;TIMP1;JUNB;SQSTM1;BIRC3
Carboxyterminal Post-Translational Modifications of Tubulin	1/45	2.22	0.254558	0.472224	3.493	4.7791	TUBA4A
Regulation of RUNX3 Expression and Activity	1/45	2.22	0.254558	0.472224	3.493	4.7791	ADRM1
Somitogenesis	1/45	2.22	0.254558	0.472224	3.493	4.7791	ADRM1
PKMTs Methylate Histone Lysines	1/46	2.17	0.259415	0.476058	3.4152	4.6082	NFKB2
Hh Mutants Abrogate Ligand Secretion	1/46	2.17	0.259415	0.476058	3.4152	4.6082	ADRM1
Metabolism of Polyamines	1/46	2.17	0.259415	0.476058	3.4152	4.6082	ADRM1
Degradation of GLI1 by the Proteasome	1/47	2.13	0.26424	0.476626	3.3407	4.4462	ADRM1
Degradation of GLI2 by the Proteasome	1/47	2.13	0.26424	0.476626	3.3407	4.4462	ADRM1
GLI3 Is Processed to GLI3R by the Proteasome	1/47	2.13	0.26424	0.476626	3.3407	4.4462	ADRM1
Heme Signaling	1/47	2.13	0.26424	0.476626	3.3407	4.4462	HMOX1
Metabolism of Steroids	2/155	1.29	0.267007	0.476626	2.0136	2.6589	AKR1C1;AKR1C3
Complex IV Assembly	1/48	2.08	0.269033	0.476626	3.2695	4.2926	RAB5IF
Defective CFTR Causes Cystic Fibrosis	1/48	2.08	0.269033	0.476626	3.2695	4.2926	ADRM1
Recycling Pathway of L1	1/48	2.08	0.269033	0.476626	3.2695	4.2926	TUBA4A
Gap Junction Trafficking	1/48	2.08	0.269033	0.476626	3.2695	4.2926	TUBA4A
IRS-mediated Signalling	1/48	2.08	0.269033	0.476626	3.2695	4.2926	TRIB3
Signaling by TGFBR3	1/49	2.04	0.273796	0.483392	3.2012	4.1468	TIMP1
SCF(Skp2)-mediated Degradation of P27 P21	1/50	2	0.278528	0.484924	3.1357	4.0082	ADRM1
Cellular Response to Starvation	2/161	1.24	0.281453	0.484924	1.937	2.4557	ATP6V0B;TRIB3
Neurotransmitter Release Cycle	1/51	1.96	0.283229	0.484924	3.0729	3.8764	LIN7B
Asymmetric Localization of PCP Proteins	1/51	1.96	0.283229	0.484924	3.0729	3.8764	ADRM1
Gap Junction Trafficking and Regulation	1/51	1.96	0.283229	0.484924	3.0729	3.8764	TUBA4A
Transcriptional and Post-Translational Regulation of MITF-M Expression and Activity	1/51	1.96	0.283229	0.484924	3.0729	3.8764	TFEC
COPI-independent Golgi-to-ER Retrograde Traffic	1/52	1.92	0.2879	0.484924	3.0125	3.7509	TUBA4A
Proteasome Assembly	1/52	1.92	0.2879	0.484924	3.0125	3.7509	ADRM1
Hedgehog Ligand Biogenesis	1/52	1.92	0.2879	0.484924	3.0125	3.7509	ADRM1
IRS-related Events Triggered by IGF1R	1/52	1.92	0.2879	0.484924	3.0125	3.7509	TRIB3
Protein Localization	2/164	1.22	0.28867	0.484924	1.9008	2.3618	PRNP;HMOX1
Metabolism of Carbohydrates	3/290	1.03	0.291883	0.484924	1.6118	1.9848	CHPF2;B3GAT3;TALDO1
mRNA Splicing - Minor Pathway	1/53	1.89	0.292541	0.484924	2.9544	3.6314	ZMAT5
p53-Dependent G1 DNA Damage Response	1/53	1.89	0.292541	0.484924	2.9544	3.6314	ADRM1
p53-Dependent G1 S DNA Damage Checkpoint	1/53	1.89	0.292541	0.484924	2.9544	3.6314	ADRM1
Oxygen-dependent Proline Hydroxylation of Hypoxia-inducible Factor Alpha	1/53	1.89	0.292541	0.484924	2.9544	3.6314	ADRM1
IGF1R Signaling Cascade	1/53	1.89	0.292541	0.484924	2.9544	3.6314	TRIB3
Intraflagellar Transport	1/53	1.89	0.292541	0.484924	2.9544	3.6314	TUBA4A
Autodegradation of Cdh1 by Cdh1 APC C	1/54	1.85	0.297152	0.484924	2.8985	3.5174	ADRM1
SARS-CoV-1 Activates Modulates Innate Immune Responses	1/54	1.85	0.297152	0.484924	2.8985	3.5174	NFKBIA
Signaling by Type 1 Insulin-like Growth Factor 1 Receptor (IGF1R)	1/54	1.85	0.297152	0.484924	2.8985	3.5174	TRIB3
Insulin Receptor Signalling Cascade	1/54	1.85	0.297152	0.484924	2.8985	3.5174	TRIB3
Ion Homeostasis	1/54	1.85	0.297152	0.484924	2.8985	3.5174	CLIC2
APC C Cdc20 Mediated Degradation of Securin	1/55	1.82	0.301732	0.484924	2.8447	3.4085	ADRM1
Amino Acids Regulate mTORC1	1/55	1.82	0.301732	0.484924	2.8447	3.4085	ATP6V0B
RHOJ GTPase Cycle	1/55	1.82	0.301732	0.484924	2.8447	3.4085	SLC1A5
Regulation of RAS by GAPs	1/55	1.82	0.301732	0.484924	2.8447	3.4085	ADRM1
G1 S DNA Damage Checkpoints	1/55	1.82	0.301732	0.484924	2.8447	3.4085	ADRM1
Antigen Processing Ubiquitination & Proteasome Degradation	3/296	1.01	0.302521	0.484924	1.5783	1.887	ADRM1;FBXO6;UNKL
SUMO E3 Ligases SUMOylate Target Proteins	2/170	1.18	0.303077	0.484924	1.8324	2.1875	NFKBIA;NFKB2
Regulation of PTEN Stability and Activity	1/56	1.79	0.306284	0.485502	2.7928	3.3046	ADRM1
Golgi Associated Vesicle Biogenesis	1/56	1.79	0.306284	0.485502	2.7928	3.3046	FTL
HSP90 Chaperone Cycle for Steroid Hormone Receptors (SHR) in the Presence of Ligand	1/56	1.79	0.306284	0.485502	2.7928	3.3046	TUBA4A
Disease	16/2131	0.75	0.309003	0.485902	1.1782	1.3837	ABCC2;B3GAT3;TXNRD1;SERPINE1;ADRM1;TALDO1;SLC3A2;TUBA4A;NFKB2;NFKBIA;IL1B;HMOX1;GCLM;JUNB;SQSTM1;ST6GALNAC4
Neurexins and Neuroligins	1/57	1.75	0.310805	0.485902	2.7428	3.2052	LIN7B
Heparan Sulfate Heparin (HS-GAG) Metabolism	1/57	1.75	0.310805	0.485902	2.7428	3.2052	B3GAT3
Hemostasis	6/707	0.85	0.311924	0.485902	1.3232	1.5415	SERPINB2;SERPINE1;SLC3A2;SLC7A11;TIMP1;TUBA4A
Orc1 Removal From Chromatin	1/58	1.72	0.315298	0.485902	2.6945	3.1101	ADRM1
Signaling by PDGF	1/58	1.72	0.315298	0.485902	2.6945	3.1101	SPP1
Glycosphingolipid Metabolism	1/58	1.72	0.315298	0.485902	2.6945	3.1101	GLA
Fatty Acid Metabolism	2/176	1.14	0.317435	0.485902	1.7687	2.0295	AKR1C3;PTGR1
SUMOylation	2/176	1.14	0.317435	0.485902	1.7687	2.0295	NFKBIA;NFKB2
RHOQ GTPase Cycle	1/59	1.69	0.319762	0.485902	2.648	3.0191	SLC1A5
Cytoprotection by HMOX1	1/59	1.69	0.319762	0.485902	2.648	3.0191	HMOX1
Regulation of RUNX2 Expression and Activity	1/59	1.69	0.319762	0.485902	2.648	3.0191	ADRM1
Formation of Paraxial Mesoderm	1/59	1.69	0.319762	0.485902	2.648	3.0191	ADRM1
Separation of Sister Chromatids	2/177	1.13	0.319822	0.485902	1.7585	2.0047	ADRM1;TUBA4A
CDK-mediated Phosphorylation and Removal of Cdc6	1/60	1.67	0.324196	0.489641	2.6029	2.932	ADRM1
Cdc20 Phospho-APC C Mediated Degradation of Cyclin A	1/60	1.67	0.324196	0.489641	2.6029	2.932	ADRM1
APC C Cdh1 Mediated Degradation of Cdc20 and Other APC C Cdh1 Targets in Late Mitosis Early G1	1/61	1.64	0.328602	0.491942	2.5594	2.8484	ADRM1
APC Cdc20 Mediated Degradation of Cell Cycle Proteins Prior to Satisfation of the Checkpoint	1/61	1.64	0.328602	0.491942	2.5594	2.8484	ADRM1
Assembly of Collagen Fibrils and Other Multimeric Structures	1/61	1.64	0.328602	0.491942	2.5594	2.8484	COL27A1
Cellular Response to Hypoxia	1/62	1.61	0.33298	0.494562	2.5173	2.7683	ADRM1
Kinesins	1/62	1.61	0.33298	0.494562	2.5173	2.7683	TUBA4A
G2 M Transition	2/184	1.09	0.336473	0.494562	1.6902	1.8411	ADRM1;TUBA4A
Ion Channel Transport	2/184	1.09	0.336473	0.494562	1.6902	1.8411	ATP6V0B;CLIC2
APC C Cdc20 Mediated Degradation of Mitotic Proteins	1/63	1.59	0.337329	0.494562	2.4766	2.6913	ADRM1
NCAM Signaling for Neurite Out-Growth	1/63	1.59	0.337329	0.494562	2.4766	2.6913	PRNP
Translation of Structural Proteins 9694635	1/63	1.59	0.337329	0.494562	2.4766	2.6913	ST6GALNAC4
G Alpha (I) Signalling Events	3/316	0.95	0.33808	0.494562	1.476	1.6006	CXCL8;CCL20;CXCL2
Mitotic G2-G2 M Phases	2/186	1.08	0.341209	0.495537	1.6717	1.7975	ADRM1;TUBA4A
Activation of APC C and APC C Cdc20 Mediated Degradation of Mitotic Proteins	1/64	1.56	0.34165	0.495537	2.4372	2.6175	ADRM1
Synthesis of Substrates in N-glycan Biosythesis	1/64	1.56	0.34165	0.495537	2.4372	2.6175	ST6GALNAC4
Cytochrome P450 - Arranged by Substrate Type	1/65	1.54	0.345943	0.500346	2.399	2.5465	POR
Regulation of APC C Activators Between G1 S and Early Anaphase	1/68	1.47	0.358656	0.517272	2.2912	2.3494	ADRM1
Loss of Nlp From Mitotic Centrosomes	1/69	1.45	0.362839	0.520374	2.2574	2.2886	TUBA4A
Loss of Proteins Required for Interphase Microtubule Organization From the Centrosome	1/69	1.45	0.362839	0.520374	2.2574	2.2886	TUBA4A
Circadian Clock	1/70	1.43	0.366994	0.523495	2.2246	2.2299	SERPINE1
Fc Epsilon Receptor (FCERI) Signaling	2/197	1.02	0.36706	0.523495	1.5765	1.58	NFKBIA;ADRM1
Class A 1 (Rhodopsin-like Receptors)	3/333	0.9	0.368249	0.523732	1.3987	1.3973	CXCL8;CCL20;CXCL2
Metabolism of Vitamins and Cofactors	2/198	1.01	0.369392	0.523902	1.5684	1.562	AKR1C1;AKR1C3
Translocation of SLC2A4 (GLUT4) to the Plasma Membrane	1/71	1.41	0.371123	0.524904	2.1927	2.1734	TUBA4A
AURKA Activation by TPX2	1/72	1.39	0.375226	0.524906	2.1617	2.119	TUBA4A
trans-Golgi Network Vesicle Budding	1/72	1.39	0.375226	0.524906	2.1617	2.119	FTL
Degradation of Beta-Catenin by the Destruction Complex	1/72	1.39	0.375226	0.524906	2.1617	2.119	ADRM1
Signaling by NOTCH4	1/72	1.39	0.375226	0.524906	2.1617	2.119	ADRM1
Neutrophil Degranulation	4/478	0.84	0.377066	0.526043	1.299	1.267	CRISPLD2;TOM1;GLA;FTL
Cyclin E Associated Events During G1 S Transition	1/73	1.37	0.379301	0.526294	2.1316	2.0664	ADRM1
Hedgehog 'On' State	1/73	1.37	0.379301	0.526294	2.1316	2.0664	ADRM1
Muscle Contraction	2/204	0.98	0.383311	0.528894	1.5213	1.4588	KCNE4;CLIC2
Neurotransmitter Receptors and Postsynaptic Signal Transmission	2/204	0.98	0.383311	0.528894	1.5213	1.4588	LIN7B;TUBA4A
APC C-mediated Degradation of Cell Cycle Proteins	1/75	1.33	0.387374	0.528894	2.0737	1.9667	ADRM1
Nuclear Envelope (NE) Reassembly	1/75	1.33	0.387374	0.528894	2.0737	1.9667	TUBA4A
Cyclin A Cdk2-associated Events at S Phase Entry	1/75	1.33	0.387374	0.528894	2.0737	1.9667	ADRM1
Regulation of Mitotic Cell Cycle	1/75	1.33	0.387374	0.528894	2.0737	1.9667	ADRM1
Cell Death Signalling via NRAGE, NRIF and NADE	1/76	1.32	0.391371	0.530111	2.046	1.9193	SQSTM1
ECM Proteoglycans	1/76	1.32	0.391371	0.530111	2.046	1.9193	SERPINE1
Regulation of mRNA Stability by Proteins That Bind AU-rich Elements	1/76	1.32	0.391371	0.530111	2.046	1.9193	ADRM1
PCP CE Pathway	1/79	1.27	0.403207	0.538595	1.967	1.7866	ADRM1
Biosynthesis of the N-glycan Precursor (Dolichol LLO) and Transfer to a Nascent Protein	1/79	1.27	0.403207	0.538595	1.967	1.7866	ST6GALNAC4
Signaling by MET	1/79	1.27	0.403207	0.538595	1.967	1.7866	COL27A1
Switching of Origins to a Post-Replicative State	1/79	1.27	0.403207	0.538595	1.967	1.7866	ADRM1
PKR-mediated Signaling	1/80	1.25	0.407102	0.538595	1.942	1.7453	TUBA4A
Post NMDA Receptor Activation Events	1/80	1.25	0.407102	0.538595	1.942	1.7453	TUBA4A
ER-Phagosome Pathway	1/80	1.25	0.407102	0.538595	1.942	1.7453	ADRM1
Late SARS-CoV-2 Infection Events	1/80	1.25	0.407102	0.538595	1.942	1.7453	ST6GALNAC4
MAPK6 MAPK4 Signaling	1/80	1.25	0.407102	0.538595	1.942	1.7453	ADRM1
Centrosome Maturation	1/81	1.23	0.410971	0.539531	1.9176	1.7052	TUBA4A
Recruitment of Mitotic Centrosome Proteins and Complexes	1/81	1.23	0.410971	0.539531	1.9176	1.7052	TUBA4A
Senescence-Associated Secretory Phenotype (SASP)	1/81	1.23	0.410971	0.539531	1.9176	1.7052	CXCL8
Mitotic Anaphase	2/221	0.9	0.422005	0.551745	1.402	1.2096	ADRM1;TUBA4A
Transport of Bile Salts and Organic Acids, Metal Ions and Amine Compounds	1/84	1.19	0.422429	0.551745	1.848	1.5925	SLC6A6
Mitotic Metaphase and Anaphase	2/222	0.9	0.424244	0.552441	1.3956	1.1967	ADRM1;TUBA4A
RUNX1 Regulates Transcription of Genes Involved in Differentiation of HSCs	1/85	1.18	0.4262	0.552441	1.826	1.5573	ADRM1
Integrin Cell Surface Interactions	1/85	1.18	0.4262	0.552441	1.826	1.5573	SPP1
Regulation of PLK1 Activity at G2 M Transition	1/87	1.15	0.433666	0.5607	1.7833	1.4899	TUBA4A
Protein-protein Interactions at Synapses	1/88	1.14	0.437364	0.562126	1.7627	1.4578	LIN7B
Classical Antibody-Mediated Complement Activation	1/88	1.14	0.437364	0.562126	1.7627	1.4578	C1S
Class I MHC Mediated Antigen Processing & Presentation	3/373	0.8	0.438063	0.562126	1.2449	1.0276	ADRM1;FBXO6;UNKL
Cell Surface Interactions at the Vascular Wall	2/233	0.86	0.448568	0.574167	1.3284	1.065	SLC3A2;SLC7A11
Cellular Responses to Mechanical Stimuli	1/93	1.08	0.455494	0.580131	1.6665	1.3105	NFKBIA
Response of Endothelial Cells to Shear Stress	1/93	1.08	0.455494	0.580131	1.6665	1.3105	NFKBIA
RAC3 GTPase Cycle	1/94	1.06	0.45905	0.580329	1.6485	1.2835	SLC1A5
Recruitment of NuMA to Mitotic Centrosomes	1/94	1.06	0.45905	0.580329	1.6485	1.2835	TUBA4A
MITF-M-dependent Gene Expression	1/94	1.06	0.45905	0.580329	1.6485	1.2835	ATP6V0B
Unfolded Protein Response (UPR)	1/95	1.05	0.462582	0.583355	1.6309	1.2573	CXCL8
Antigen processing-Cross Presentation	1/96	1.04	0.466092	0.5849	1.6136	1.2318	ADRM1
Creation of C4 and C2 Activators	1/96	1.04	0.466092	0.5849	1.6136	1.2318	C1S
Anchoring of the Basal Body to the Plasma Membrane	1/97	1.03	0.469579	0.587835	1.5967	1.207	TUBA4A
SLC Transporter Disorders	1/99	1.01	0.476486	0.593579	1.564	1.1594	SLC3A2
VEGFA-VEGFR2 Pathway	1/99	1.01	0.476486	0.593579	1.564	1.1594	TRIB3
Infectious Disease	9/1311	0.69	0.482477	0.594835	1.0607	0.7731	NFKBIA;IL1B;TXNRD1;SERPINE1;ADRM1;HMOX1;ST6GALNAC4;TUBA4A;NFKB2
Assembly of the Pre-Replicative Complex	1/101	0.99	0.483303	0.594835	1.5326	1.1143	ADRM1
COPI-dependent Golgi-to-ER Retrograde Traffic	1/101	0.99	0.483303	0.594835	1.5326	1.1143	TUBA4A
COPI-mediated Anterograde Transport	1/101	0.99	0.483303	0.594835	1.5326	1.1143	TUBA4A
Cellular Response to Heat Stress	1/101	0.99	0.483303	0.594835	1.5326	1.1143	HSPB8
Initial Triggering of Complement	1/104	0.96	0.493364	0.605762	1.4877	1.0511	C1S
Phase I - Functionalization of Compounds	1/105	0.95	0.496675	0.608367	1.4733	1.0311	POR
Response of EIF2AK4 (GCN2) to Amino Acid Deficiency	1/106	0.94	0.499964	0.60948	1.4592	1.0116	TRIB3
Transcriptional Regulation by RUNX2	1/106	0.94	0.499964	0.60948	1.4592	1.0116	ADRM1
Sphingolipid Metabolism	1/107	0.93	0.503231	0.610157	1.4454	0.9925	GLA
Stimuli-sensing Channels	1/107	0.93	0.503231	0.610157	1.4454	0.9925	CLIC2
Signaling by VEGF	1/108	0.93	0.506478	0.610157	1.4318	0.974	TRIB3
Synthesis of DNA	1/108	0.93	0.506478	0.610157	1.4318	0.974	ADRM1
Integration of Energy Metabolism	1/108	0.93	0.506478	0.610157	1.4318	0.974	TALDO1
Transmission Across Chemical Synapses	2/269	0.74	0.523941	0.629714	1.1472	0.7415	LIN7B;TUBA4A
EML4 and NUDC in Mitotic Spindle Formation	1/116	0.86	0.531702	0.637544	1.3316	0.8412	TUBA4A
Negative Regulation of the PI3K AKT Network	1/118	0.85	0.537805	0.641856	1.3088	0.8118	TRIB3
DNA Replication Pre-Initiation	1/118	0.85	0.537805	0.641856	1.3088	0.8118	ADRM1
Gastrulation	1/120	0.83	0.54383	0.646035	1.2866	0.7837	ADRM1
L1CAM Interactions	1/120	0.83	0.54383	0.646035	1.2866	0.7837	TUBA4A
G1 S Transition	1/121	0.83	0.546813	0.647396	1.2758	0.7702	ADRM1
PIP3 Activates AKT Signaling	2/281	0.71	0.547505	0.647396	1.0972	0.6609	ADRM1;TRIB3
Binding and Uptake of Ligands by Scavenger Receptors	1/122	0.82	0.549777	0.648584	1.2652	0.7569	FTL
Resolution of Sister Chromatid Cohesion	1/126	0.79	0.56144	0.657797	1.2245	0.7068	TUBA4A
Host Interactions of HIV Factors	1/126	0.79	0.56144	0.657797	1.2245	0.7068	ADRM1
MHC Class II Antigen Presentation	1/126	0.79	0.56144	0.657797	1.2245	0.7068	TUBA4A
Diseases of Signal Transduction by Growth Factor Receptors and Second Messengers	3/451	0.67	0.56441	0.65847	1.0241	0.5857	ADRM1;JUNB;SQSTM1
RHO GTPase Effectors	2/291	0.69	0.566516	0.65847	1.0587	0.6016	LIN7B;TUBA4A
Regulation of Complement Cascade	1/128	0.78	0.567159	0.65847	1.2051	0.6834	C1S
Glycerophospholipid Biosynthesis	1/128	0.78	0.567159	0.65847	1.2051	0.6834	ABHD4
Beta-catenin Independent WNT Signaling	1/134	0.75	0.583875	0.676344	1.1504	0.619	ADRM1
Golgi-to-ER Retrograde Transport	1/135	0.74	0.586598	0.677964	1.1417	0.609	TUBA4A
GPCR Ligand Binding	3/467	0.64	0.588164	0.678243	0.988	0.5244	CXCL8;CCL20;CXCL2
G2 M Checkpoints	1/137	0.73	0.591991	0.679611	1.1248	0.5897	ADRM1
Metabolism of Proteins	13/2067	0.63	0.592721	0.679611	0.9638	0.5041	ADRM1;AFP;TUBA4A;NFKB2;NFKBIA;UCHL1;SPP1;GCNT3;FBXO6;TIMP1;SQSTM1;ST6GALNAC4;BIRC3
Asparagine N-linked Glycosylation	2/306	0.65	0.593953	0.679611	1.0057	0.5239	ST6GALNAC4;TUBA4A
Mitotic G1 Phase and G1 S Transition	1/139	0.72	0.597314	0.679611	1.1084	0.5712	ADRM1
Complement Cascade	1/139	0.72	0.597314	0.679611	1.1084	0.5712	C1S
RHO GTPases Activate Formins	1/139	0.72	0.597314	0.679611	1.1084	0.5712	TUBA4A
Bacterial Infection Pathways	1/143	0.7	0.607755	0.688431	1.077	0.5363	TXNRD1
DNA Replication	1/143	0.7	0.607755	0.688431	1.077	0.5363	ADRM1
PTEN Regulation	1/145	0.69	0.612874	0.692697	1.0619	0.5199	ADRM1
Diseases of Glycosylation	1/146	0.68	0.615409	0.69403	1.0545	0.5119	B3GAT3
Intracellular Signaling by Second Messengers	2/321	0.62	0.620087	0.697768	0.9576	0.4576	ADRM1;TRIB3
S Phase	1/150	0.67	0.625384	0.702186	1.026	0.4816	ADRM1
SARS-CoV Infections	3/498	0.6	0.631797	0.707834	0.9246	0.4246	NFKBIA;SERPINE1;ST6GALNAC4
ER to Golgi Anterograde Transport	1/155	0.65	0.637493	0.712656	0.9924	0.4468	TUBA4A
Antiviral Mechanism by IFN-stimulated Genes	1/158	0.63	0.644571	0.715879	0.9733	0.4275	TUBA4A
Respiratory Electron Transport	1/158	0.63	0.644571	0.715879	0.9733	0.4275	RAB5IF
Factors Involved in Megakaryocyte Development and Platelet Production	1/158	0.63	0.644571	0.715879	0.9733	0.4275	TUBA4A
Regulation of Expression of SLITs and ROBOs	1/164	0.61	0.658318	0.729564	0.9372	0.3918	ADRM1
Cellular Senescence	1/167	0.6	0.664992	0.735369	0.9201	0.3754	CXCL8
Apoptosis	1/168	0.6	0.667188	0.736207	0.9146	0.3701	ADRM1
Transcriptional Regulation by TP53	2/362	0.55	0.684927	0.754156	0.8468	0.3205	TXNRD1;GSR
Axon Guidance	3/541	0.55	0.686911	0.754718	0.8488	0.3188	PRNP;ADRM1;TUBA4A
M Phase	2/372	0.54	0.699311	0.766294	0.8235	0.2945	ADRM1;TUBA4A
RAC1 GTPase Cycle	1/184	0.54	0.700441	0.766294	0.8339	0.2969	SLC1A5
Transport to the Golgi and Subsequent Modification	1/186	0.54	0.704358	0.768937	0.8248	0.2891	TUBA4A
TCF Dependent Signaling in Response to WNT	1/189	0.53	0.710139	0.773599	0.8116	0.2778	ADRM1
Nervous System Development	3/567	0.53	0.717158	0.779585	0.8086	0.2688	PRNP;ADRM1;TUBA4A
Cilium Assembly	1/200	0.5	0.730394	0.792292	0.7663	0.2407	TUBA4A
Transcriptional Regulation by RUNX1	1/202	0.5	0.733923	0.794436	0.7586	0.2347	ADRM1
Mitotic Prometaphase	1/203	0.49	0.73567	0.794648	0.7548	0.2317	TUBA4A
Intra-Golgi and Retrograde Golgi-to-ER Traffic	1/204	0.49	0.737406	0.794846	0.751	0.2288	TUBA4A
HCMV Early Events	1/205	0.49	0.73913	0.795031	0.7473	0.2259	TUBA4A
Signaling by NOTCH	1/209	0.48	0.745916	0.80034	0.7328	0.2148	ADRM1
Signaling by ROBO Receptors	1/210	0.48	0.747585	0.80034	0.7292	0.2121	ADRM1
Phospholipid Metabolism	1/211	0.47	0.749243	0.80034	0.7257	0.2095	ABHD4
Neuronal System	2/411	0.49	0.750319	0.80034	0.7435	0.2136	LIN7B;TUBA4A
mRNA Splicing	1/215	0.47	0.755768	0.804477	0.712	0.1994	ZMAT5
HIV Infection	1/227	0.44	0.774349	0.822545	0.6738	0.1723	ADRM1
GPCR Downstream Signalling	3/633	0.47	0.783827	0.830889	0.7214	0.1757	CXCL8;CCL20;CXCL2
Chromatin Modifying Enzymes	1/238	0.42	0.790146	0.834134	0.6422	0.1513	NFKB2
Chromatin Organization	1/238	0.42	0.790146	0.834134	0.6422	0.1513	NFKB2
Viral Infection Pathways	5/1029	0.49	0.804883	0.847943	0.7362	0.1598	NFKBIA;SERPINE1;ADRM1;ST6GALNAC4;TUBA4A
Signaling by Rho GTPases	3/672	0.45	0.816812	0.854776	0.678	0.1372	SLC1A5;LIN7B;TUBA4A
HCMV Infection	1/259	0.39	0.817319	0.854776	0.5893	0.1189	TUBA4A
Generic Transcription Pathway	6/1230	0.49	0.817855	0.854776	0.7371	0.1482	TXNRD1;SERPINE1;GSR;ADRM1;SPP1;JUNB
Aerobic Respiration and Respiratory Electron Transport	1/260	0.38	0.818522	0.854776	0.587	0.1175	RAB5IF
Cell Cycle Checkpoints	1/261	0.38	0.819717	0.854776	0.5847	0.1162	ADRM1
RAF MAP Kinase Cascade	1/265	0.38	0.82442	0.857933	0.5757	0.1112	ADRM1
Signaling by Rho GTPases, Miro GTPases and RHOBTB3	3/688	0.44	0.829069	0.859795	0.6616	0.124	SLC1A5;LIN7B;TUBA4A
Signaling by Nuclear Receptors	1/270	0.37	0.830128	0.859795	0.5649	0.1052	AKR1C3
MAPK1 MAPK3 Signaling	1/271	0.37	0.831247	0.859795	0.5627	0.104	ADRM1
Interferon Signaling	1/280	0.36	0.840997	0.867434	0.5443	0.0943	TUBA4A
Signaling by GPCR	3/706	0.42	0.842021	0.867434	0.644	0.1107	CXCL8;CCL20;CXCL2
Processing of Capped Intron-Containing Pre-mRNA	1/285	0.35	0.84617	0.869958	0.5346	0.0893	ZMAT5
Signaling by WNT	1/287	0.35	0.848192	0.870289	0.5308	0.0874	ADRM1
Cell Cycle, Mitotic	2/516	0.39	0.852322	0.872778	0.5884	0.094	ADRM1;TUBA4A
Organelle Biogenesis and Maintenance	1/297	0.34	0.857913	0.876749	0.5126	0.0786	TUBA4A
SARS-CoV-2 Infection	1/313	0.32	0.872198	0.888663	0.4859	0.0664	ST6GALNAC4
MAPK Family Signaling Cascades	1/314	0.32	0.873042	0.888663	0.4844	0.0658	ADRM1
RNA Polymerase II Transcription	6/1360	0.44	0.883697	0.897724	0.6617	0.0818	TXNRD1;SERPINE1;GSR;ADRM1;SPP1;JUNB
Gene Expression (Transcription)	7/1615	0.43	0.908432	0.921024	0.6463	0.0621	BRF2;TXNRD1;SERPINE1;GSR;ADRM1;SPP1;JUNB
Membrane Trafficking	2/633	0.32	0.920445	0.93136	0.4764	0.0395	TUBA4A;FTL
Sensory Perception	2/640	0.31	0.923407	0.932513	0.471	0.0375	AKR1C1;AKR1C3
Cell Cycle	2/649	0.31	0.927063	0.934362	0.4642	0.0352	ADRM1;TUBA4A
RHO GTPase Cycle	1/450	0.22	0.948597	0.954188	0.3353	0.0177	SLC1A5
Developmental Biology	5/1385	0.36	0.951462	0.955193	0.5359	0.0267	PRNP;ATP6V0B;TFEC;ADRM1;TUBA4A
Vesicle-mediated Transport	2/752	0.27	0.958754	0.96063	0.3983	0.0168	TUBA4A;FTL
Metabolism of RNA	2/761	0.26	0.960791	0.960791	0.3934	0.0157	ZMAT5;ADRM1

## Sheet: WikiPathways_UP
WikiPathways 2024 Human | Common Upregulated DEGs (MM27 & MM13) | Sorted by Adjusted P-value | Bold = shown in figure
Top 20 sig. → orange | Other sig. → yellow | Bold = in figure (4) | Significant (adj.p<0.05): 57/285
Term	Overlap	Overlap (%)	P-value	Adjusted P-value	Odds Ratio	Combined Score	Genes
Ferroptosis WP4313	12/65	18.46	1.01891e-14	2.90388e-12	38.0243	1225.05	PRNP;POR;TXNRD1;AKR1C1;AKR1C3;HSPB1;HMOX1;SLC3A2;SLC7A11;SLC1A5;GCLM;FTL
Nuclear Receptors Meta Pathway WP2882	19/314	6.05	1.91594e-13	2.73021e-11	11.3582	332.607	GSTM3;SERPINB2;ABCC2;GADD45B;SRXN1;CCL20;TXNRD1;GSR;SLC7A11;PTGR1;NFKB2;SLC6A6;IL1B;HMOX1;GCLM;JUNB;SQSTM1;FTL;BIRC3
NRF2 Pathway WP2884	12/141	8.51	1.33e-10	1.2635e-08	15.5625	353.901	GSTM3;SLC6A6;ABCC2;SRXN1;TXNRD1;GSR;HMOX1;SLC7A11;GCLM;PTGR1;SQSTM1;FTL
TNF Related Weak Inducer Of Apoptosis TWEAK Signaling WP2036	7/38	18.42	4.4449e-09	3.16699e-07	36.4209	700.429	NFKBIA;TRAF1;MAP3K14;RELB;NFKB2;BIRC3;NFKBIB
Ebstein Barr Virus LMP1 Signaling WP262	6/23	26.09	6.18959e-09	3.52806e-07	56.5076	1068.02	NFKBIA;CXCL8;CCL20;TRAF1;MAP3K14;NFKB2
Antiviral And Anti-Inflam Effects Of Nrf2 On SARS CoV 2 Pathway WP5113	6/31	19.35	4.32647e-08	2.05507e-06	38.4097	651.272	NFKBIA;CXCL8;IL1B;HMOX1;SLC7A11;GCLM
Photodynamic Therapy Induced NF kB Survival Signaling WP3617	6/35	17.14	9.33715e-08	3.80155e-06	33.1051	535.862	CXCL8;IL1B;CXCL2;RELB;NFKB2;BIRC3
Lung Fibrosis WP3624	6/63	9.52	3.36833e-06	0.000119997	16.8192	211.94	CXCL8;IL1B;SPP1;HMOX1;TIMP1;CXCL2
mRNA Protein And Metabolite Inducation Pathway By Cyclosporin A WP3953	3/7	42.86	9.21441e-06	0.00029179	117.319	1360.28	SLC3A2;SLC1A5;SLC7A11
Photodynamic Therapy Induced NFE2L2 NRF2 Survival Signaling WP3612	4/23	17.39	1.37114e-05	0.000390775	33.1679	371.391	ABCC2;SRXN1;HMOX1;GCLM
RANKL RANK Signaling WP2018	5/50	10	1.79973e-05	0.000466294	17.6222	192.528	NFKBIA;TRAF1;SQSTM1;RELB;NFKB2
Selenium Micronutrient Network WP15	6/86	6.98	2.06312e-05	0.000489992	11.9698	129.138	KYNU;IL1B;TXNRD1;SERPINE1;GSR;NFKB2
TNF Alpha Signaling WP231	6/89	6.74	2.50979e-05	0.000535611	11.5354	122.191	NFKBIA;TRAF1;MAP3K14;BIRC3;NFKB2;NFKBIB
IL1 Signaling WP195	5/54	9.26	2.63107e-05	0.000535611	16.1804	170.631	NFKBIA;IL1B;SQSTM1;MAP3K14;NFKBIB
Network Map Of SARS CoV 2 Signaling WP5115	9/254	3.54	4.31844e-05	0.000820504	5.958	59.8781	CXCL8;C1S;CCL20;IL1B;SERPINE1;JUNB;CXCL2;NFKB2;CCL26
Oxidative Stress Response WP408	4/33	12.12	6.02527e-05	0.00107325	21.7198	211.05	TXNRD1;GSR;HMOX1;JUNB
miRNA Role In Immune Response In Sepsis WP4329	4/37	10.81	9.53124e-05	0.00159789	19.0832	176.679	NFKBIA;CXCL8;RELB;NFKB2
Transcriptional Activation By NRF2 In Response To Phytochemicals WP3	3/15	20	0.00011531	0.00182574	39.0906	354.469	HMOX1;SLC7A11;GCLM
Catabolism Of Skeletal Muscle In Cachexia WP5474	4/40	10	0.000129916	0.00194875	17.4903	156.514	NFKBIA;IL1B;RELB;NFKB2
Overview Of Proinflammatory And Profibrotic Mediators WP5095	6/129	4.65	0.00019883	0.00283332	7.7683	66.2096	CXCL8;CCL20;IL1B;SPP1;CXCL2;CCL26
IL26 Signaling WP5347	4/48	8.33	0.000265723	0.00360624	14.3045	117.769	NFKBIA;CXCL8;CCL20;IL1B
Toll Like Receptor Signaling WP75	5/95	5.26	0.000389779	0.00482987	8.7911	69.0096	NFKBIA;CXCL8;IL1B;SPP1;NFKBIB
Small Cell Lung Cancer WP4658	5/95	5.26	0.000389779	0.00482987	8.7911	69.0096	NFKBIA;GADD45B;TRAF1;BIRC3;NFKBIB
NRF2 ARE Regulation WP4357	3/23	13.04	0.000432079	0.0049257	23.4449	181.625	HMOX1;SLC7A11;GCLM
LDL Influence On CD14 And TLR4 WP5272	3/23	13.04	0.000432079	0.0049257	23.4449	181.625	IL1B;RELB;NFKB2
Amino Acid Metabolism In Triple Negative Breast Cancer Cells WP5213	2/7	28.57	0.000861841	0.0094471	62.0781	438.051	SLC1A5;SLC7A11
Gastrin Signaling WP4659	5/115	4.35	0.000931187	0.0098292	7.1855	50.1476	NFKBIA;CXCL8;SERPINB2;SERPINE1;BIRC3
Glucocorticoid Receptor Pathway WP2880	4/70	5.71	0.00112159	0.0114162	9.5257	64.7084	GADD45B;CCL20;BIRC3;NFKB2
Signal Transduction Through IL1R WP4496	3/33	9.09	0.0012695	0.0124761	15.622	104.186	NFKBIA;IL1B;MAP3K14
Benzo A Pyrene Metabolism WP696	2/9	22.22	0.0014649	0.0139165	44.3371	289.342	AKR1C1;AKR1C3
Thymic Stromal Lymphopoietin TSLP Signaling WP2203	3/37	8.11	0.00177402	0.0163096	13.7814	87.2982	NFKBIA;RELB;NFKB2
Immune Infiltration In Pancreatic Cancer WP5285	3/39	7.69	0.00206695	0.0184088	13.0144	80.4511	CXCL8;CCL20;IL1B
Apoptosis WP254	4/84	4.76	0.00220108	0.0190093	7.8532	48.0521	NFKBIA;TRAF1;BIRC3;NFKBIB
MAPK And NFkB Signaling Inhibited By Yersinia YopJ WP3849	2/12	16.67	0.00265156	0.0222263	31.0312	184.096	NFKBIA;MAP3K14
Aryl Hydrocarbon Receptor Pathway WP2873	3/45	6.67	0.00311969	0.0247029	11.1519	64.3464	SERPINB2;IL1B;JUNB
Osteopontin Signaling WP1434	2/13	15.38	0.00312036	0.0247029	28.2088	162.759	SPP1;MAP3K14
Mineralocorticoid Biosynthesis WP5279	2/14	14.29	0.00362498	0.0271873	25.8568	145.313	AKR1C1;AKR1C3
Glucocorticoid Biosynthesis WP5280	2/14	14.29	0.00362498	0.0271873	25.8568	145.313	AKR1C1;AKR1C3
Hepatitis C And Hepatocellular Carcinoma WP3646	3/49	6.12	0.00397487	0.028321	10.1801	56.273	UCHL1;CXCL8;BIRC3
Interleukin 1 IL 1 Structural Pathway WP2637	3/49	6.12	0.00397487	0.028321	10.1801	56.273	NFKBIA;MAP3K14;NFKBIB
COVID 19 Adverse Outcome Pathway WP4891	2/15	13.33	0.00416493	0.0285591	23.8666	130.814	CXCL8;IL1B
Osteoarthritic Chondrocyte Hypertrophy WP5373	3/50	6	0.00420872	0.0285591	9.963	54.5034	SPP1;JUNB;RELB
Apoptosis Related Network Due To Altered Notch3 Ovarian Cancer WP2864	3/53	5.66	0.00495973	0.0328726	9.3638	49.688	HSPB1;TRAF1;SQSTM1
Vitamin B12 Metabolism WP1533	3/54	5.56	0.00522682	0.0338556	9.1797	48.2298	IL1B;SERPINE1;NFKB2
Macrophage Stimulating Protein MSP Signaling WP5353	4/108	3.7	0.00542611	0.0343654	6.0336	31.4744	CXCL8;IL1B;HSPB1;CXCL2
Cancer Pathways WP5434	9/507	1.78	0.00592836	0.0367301	2.8934	14.8372	NFKBIA;GSTM3;CXCL8;GADD45B;TXNRD1;HMOX1;TRAF1;NFKB2;BIRC3
Proximal Tubule Transport WP4917	3/57	5.26	0.00607944	0.0368647	8.6684	44.2336	ATP6V0B;ABCC2;SLC3A2
Extracellular Vesicles In The Crosstalk Of Cardiac Cells WP4300	2/19	10.53	0.00666869	0.0372662	18.2472	91.4247	SPP1;HSPB1
Glutathione Metabolism WP100	2/19	10.53	0.00666869	0.0372662	18.2472	91.4247	GSR;GCLM
LTF Danger Signal Response Pathway WP4478	2/19	10.53	0.00666869	0.0372662	18.2472	91.4247	CXCL8;IL1B
Overview Of Nanoparticle Effects WP3287	2/19	10.53	0.00666869	0.0372662	18.2472	91.4247	CXCL8;HMOX1
Novel Intracellular Components Of RIG I Like Receptor Pathway WP3865	3/60	5	0.00701049	0.0384229	8.2109	40.7291	NFKBIA;CXCL8;NFKBIB
STING Pathway In Kawasaki Like Disease And COVID 19 WP4961	2/21	9.52	0.0081205	0.0428582	16.3248	78.5774	NFKBIA;IL1B
7Q11 23 Distal Copy Number Variation WP5401	2/21	9.52	0.0081205	0.0428582	16.3248	78.5774	POR;HSPB1
Blood Clotting Cascade WP272	2/22	9.09	0.0088948	0.0460912	15.5078	73.2324	SERPINB2;SERPINE1
Post COVID Neuroinflammation WP5485	2/23	8.7	0.00970078	0.0485039	14.7686	68.4606	CXCL8;IL1B
FGF23 Signaling In Hypophosphatemic Rickets Related Disorders WP4790	2/23	8.7	0.00970078	0.0485039	14.7686	68.4606	SPP1;NFKB2
Folate Metabolism WP176	3/69	4.35	0.0102901	0.0502914	7.088	32.4389	IL1B;SERPINE1;NFKB2
IL1 And Megakaryocytes In Obesity WP2865	2/24	8.33	0.010538	0.0502914	14.0966	64.1785	IL1B;TIMP1
Adipogenesis WP236	4/131	3.05	0.0105877	0.0502914	4.9351	22.4453	GADD45B;SERPINE1;ID3;TRIB3
Measles Virus Infection WP4630	4/136	2.94	0.0120201	0.0545313	4.747	20.9873	NFKBIA;IL1B;NFKB2;NFKBIB
Cytokines And Inflammatory Response WP530	2/26	7.69	0.0123044	0.0545313	12.9206	56.8221	IL1B;CXCL2
Cytosolic DNA Sensing Pathway WP4655	3/74	4.05	0.012437	0.0545313	6.5872	28.8987	NFKBIA;IL1B;NFKBIB
Affected Pathways In Duchenne Muscular Dystrophy WP5356	3/74	4.05	0.012437	0.0545313	6.5872	28.8987	NFKBIA;SERPINE1;SPP1
Burn Wound Healing WP5055	3/74	4.05	0.012437	0.0545313	6.5872	28.8987	CXCL8;IL1B;TIMP1
Intracellular Trafficking Proteins Involved In CMT Neuropathy WP4856	2/27	7.41	0.0132327	0.0568387	12.4031	53.6443	HSPB8;HSPB1
Non Genomic Actions Of 1 25 Dihydroxyvitamin D3 WP4341	3/76	3.95	0.0133621	0.0568387	6.4061	27.6445	CXCL8;RELB;NFKB2
TLR4 Signaling And Tolerance WP3851	2/28	7.14	0.0141906	0.0594753	11.9255	50.745	NFKBIA;CXCL8
RAS And Bradykinin Pathways In COVID 19 WP4969	2/29	6.9	0.0151776	0.06269	11.4832	48.091	IL1B;SERPINE1
Oligodendrocyte Differentiation Leading To Myelin For CNS WP4304	2/30	6.67	0.0161932	0.0659296	11.0725	45.6539	IL1B;CXCL2
Toll Like Receptor Signaling Related To MyD88 WP3858	2/31	6.45	0.0172372	0.0682306	10.6902	43.4095	RELB;NFKB2
16P11 2 Distal Deletion Syndrome WP4950	2/31	6.45	0.0172372	0.0682306	10.6902	43.4095	CD82;TRAF1
IL17 Signaling WP2112	2/32	6.25	0.0183091	0.0714806	10.3333	41.337	MAP3K14;NFKBIB
Prostaglandin Signaling WP5088	2/33	6.06	0.0194084	0.0737519	9.9995	39.4185	CXCL8;IL1B
Resistin As A Regulator Of Inflammation WP4481	2/33	6.06	0.0194084	0.0737519	9.9995	39.4185	NFKBIA;CXCL8
Orexin Receptor Pathway WP5094	3/88	3.41	0.0197225	0.0739595	5.4984	21.5866	CXCL8;IL1B;CXCL2
Apoptosis Modulation And Signaling WP1772	3/89	3.37	0.0203157	0.0751947	5.4342	21.1735	NFKBIA;MAP3K14;BIRC3
P53 Transcriptional Gene Network WP4963	3/91	3.3	0.0215315	0.0786728	5.3101	20.3815	SERPINE1;SLC7A11;CPT1C
Corticotropin Releasing Hormone Signaling WP2355	3/92	3.26	0.022154	0.0794779	5.2502	20.0019	NFKBIA;CXCL8;JUNB
MAPK Signaling WP382	5/246	2.03	0.0223916	0.0794779	3.2579	12.3771	IL1B;HSPB1;MAP3K14;NFKB2;RELB
Chemokine Signaling WP3929	4/165	2.42	0.022763	0.0794779	3.8862	14.7001	NFKBIA;CCL20;NFKBIB;CCL26
Host Pathogen Interaction Of Human Coronaviruses MAPK Signaling WP4877	2/36	5.56	0.0228673	0.0794779	9.1158	34.4399	MAP3K10;JUNB
Neovascularization Processes WP4331	2/37	5.41	0.0240727	0.081701	8.8549	32.9994	RELB;NFKB2
Complement System WP2806	3/95	3.16	0.0240803	0.081701	5.0782	18.9233	PRNP;C1S;SPP1
Cytokine Cytokine Receptor Interaction WP5473	5/255	1.96	0.025644	0.0859829	3.1392	11.5003	CXCL8;CCL20;IL13RA2;CXCL2;CCL26
Oxidative Damage Response WP3941	2/40	5	0.0278404	0.0922617	8.1546	29.2038	C1S;TRAF1
Nucleotide Binding Oligomerization Domain NOD Pathway WP1433	2/41	4.88	0.0291456	0.0943921	7.9451	28.0896	NFKBIA;IL1B
Glycosaminoglycan Synthesis In Fibroblasts WP5395	2/41	4.88	0.0291456	0.0943921	7.9451	28.0896	B3GAT3;CHPF2
Metabolic Reprogramming In Colon Cancer WP4290	2/42	4.76	0.0304749	0.0975882	7.7461	27.0405	TALDO1;SLC1A5
Metapathway Biotransformation Phase I And II WP702	4/183	2.19	0.0316566	0.0996808	3.4922	12.058	GSTM3;AKR1C1;GSR;AKR1C3
IL6 Signaling WP364	2/43	4.65	0.0318279	0.0996808	7.5568	26.0513	TIMP1;JUNB
Prostaglandin Synthesis And Regulation WP98	2/45	4.44	0.0346035	0.107196	7.2046	24.2348	AKR1C1;AKR1C3
NO cGMP PKG Mediated Neuroprotection WP4008	2/46	4.35	0.0360254	0.1104	7.0405	23.3993	NFKBIA;IL1B
HDAC6 Interactions In The Central Nervous System WP5426	3/112	2.68	0.0366494	0.111118	4.2825	14.1596	HSPB1;SQSTM1;TUBA4A
Omega 6 Fatty Acids In Senescence WP5424	2/48	4.17	0.0389357	0.116807	6.7337	21.8565	SERPINE1;AKR1C3
Spinal Cord Injury WP2431	3/119	2.52	0.0426309	0.126561	4.0227	12.6922	CXCL8;IL1B;CXCL2
Pentose Phosphate Metabolism WP134	1/7	14.29	0.0446286	0.128476	25.6641	79.7994	TALDO1
Activation Of NLRP3 Inflammasome By SARS CoV 2 WP4876	1/7	14.29	0.0446286	0.128476	25.6641	79.7994	IL1B
Nanomaterial Induced Inflammasome Activation WP3890	1/7	14.29	0.0446286	0.128476	25.6641	79.7994	IL1B
NRP1 Triggered Signaling In Pancreatic Cancer WP5144	2/53	3.77	0.0465833	0.132762	6.072	18.6199	RELB;NFKB2
TGF Beta Receptor Signaling WP560	2/54	3.7	0.048174	0.133208	5.9549	18.0609	SERPINE1;SPP1
Overlap Between Signal Transduction Pathways LMNA Laminopathies WP4879	2/55	3.64	0.0497842	0.133208	5.8423	17.5272	SPP1;JUNB
Canonical NF kB Pathway WP4562	1/8	12.5	0.0508407	0.133208	21.9967	65.5294	NFKBIA
ApoE And miR 146 In Inflammation And Atherosclerosis WP3926	1/8	12.5	0.0508407	0.133208	21.9967	65.5294	NFKB2
EPAC1 And PKA Reduction Of Retinal Inflammation WP5440	1/8	12.5	0.0508407	0.133208	21.9967	65.5294	IL1B
Pentose Phosphate Pathway In Senescent Cells WP5043	1/8	12.5	0.0508407	0.133208	21.9967	65.5294	TALDO1
NAD Biosynthesis II From Tryptophan WP2485	1/8	12.5	0.0508407	0.133208	21.9967	65.5294	KYNU
Oncostatin M Signaling WP2374	2/56	3.57	0.0514138	0.133208	5.7338	17.017	NFKBIA;JUNB
IL18 Signaling WP4754	2/56	3.57	0.0514138	0.133208	5.7338	17.017	NFKBIA;HSPB1
11P11 2 Copy Number Variation Syndrome WP5348	2/56	3.57	0.0514138	0.133208	5.7338	17.017	CD82;TIMP1
TGF Beta Receptor Signaling In Skeletal Dysplasias WP4816	2/58	3.45	0.0547295	0.138877	5.5285	16.0621	SERPINE1;SPP1
Complement And Coagulation Cascades WP558	2/58	3.45	0.0547295	0.138877	5.5285	16.0621	C1S;SERPINE1
Dengue 2 Interactions With Complement And Coagulation Cascades WP3896	2/59	3.39	0.056415	0.138877	5.4312	15.6148	C1S;SERPINE1
Altered Glycosylation Of MUC1 In Tumor Microenvironment WP4480	1/9	11.11	0.0570127	0.138877	19.2461	55.1302	NFKBIA
Suppression Of HMGB1 Mediated Inflammation By THBD WP4479	1/9	11.11	0.0570127	0.138877	19.2461	55.1302	NFKBIA
Steroid Hormone Precursor Biosynthesis WP5277	1/9	11.11	0.0570127	0.138877	19.2461	55.1302	AKR1C1
Amino Acid Transport Defects IEMs WP5029	1/9	11.11	0.0570127	0.138877	19.2461	55.1302	SLC3A2
2Q37 Copy Number Variation Syndrome WP5224	3/136	2.21	0.0590431	0.142604	3.5055	9.9187	NFKBIA;GABARAPL1;IL1B
Modulators Of TCR Signaling And T Cell Activation WP5072	2/61	3.28	0.05984	0.143314	5.2466	14.7747	NFKBIA;MAP3K14
T Cell Antigen Receptor TCR Pathway During Staph A. Infection WP3863	2/62	3.23	0.0615788	0.145041	5.1589	14.38	NFKBIA;MAP3K14
TYROBP Causal Network In Microglia WP3945	2/62	3.23	0.0615788	0.145041	5.1589	14.38	SPP1;SLC1A5
Trans Sulfuration Pathway WP2333	1/10	10	0.0631449	0.146311	17.1068	47.2545	GCLM
Interleukin 1 Induced Activation Of NF kB WP3656	1/10	10	0.0631449	0.146311	17.1068	47.2545	SQSTM1
SARS CoV 2 Innate Immunity Evasion And Cell Immune Response WP5039	2/66	3.03	0.0687028	0.154162	4.8354	12.9492	CXCL8;CXCL2
Inclusion Body Myositis WP5120	1/11	9.09	0.0692375	0.154162	15.3953	41.1089	NFKB2
IDO Metabolic Pathway WP5414	1/11	9.09	0.0692375	0.154162	15.3953	41.1089	KYNU
Alternative Pathway Of Fetal Androgen Synthesis WP4524	1/11	9.09	0.0692375	0.154162	15.3953	41.1089	POR
Serotonin Transporter Activity WP1455	1/11	9.09	0.0692375	0.154162	15.3953	41.1089	IL1B
Trans Sulfuration One Carbon Metabolism And Related Pathways WP2525	2/69	2.9	0.0742148	0.157778	4.6182	12.0111	GSR;GCLM
Th17 Cell Differentiation Pathway WP5130	2/69	2.9	0.0742148	0.157778	4.6182	12.0111	NFKBIA;IL1B
Urotensin II Mediated Signaling WP5158	2/69	2.9	0.0742148	0.157778	4.6182	12.0111	IL1B;HMOX1
TGFB Smad Signaling WP5382	1/12	8.33	0.0752907	0.157778	13.9951	36.1968	SERPINE1
Irinotecan Pathway WP229	1/12	8.33	0.0752907	0.157778	13.9951	36.1968	ABCC2
Nanoparticle Triggered Regulated Necrosis WP2513	1/12	8.33	0.0752907	0.157778	13.9951	36.1968	FTL
Enterohepatic Circulation Of Bile Acids WP5396	1/12	8.33	0.0752907	0.157778	13.9951	36.1968	ABCC2
IL10 Anti Inflammatory Signaling WP4495	1/12	8.33	0.0752907	0.157778	13.9951	36.1968	HMOX1
Leukotriene Metabolic Pathway WP5171	1/13	7.69	0.0813049	0.16434	12.8282	32.1929	PTGR1
Male Steroid Hormones In Cardiomyocyte Energy Metabolism WP5320	1/13	7.69	0.0813049	0.16434	12.8282	32.1929	AKR1C3
Mammary Gland Development Pathway Puberty Stage 2 Of 4 WP2814	1/13	7.69	0.0813049	0.16434	12.8282	32.1929	TIMP1
Neuroinflammation WP4919	1/13	7.69	0.0813049	0.16434	12.8282	32.1929	NFKBIA
EDA Signaling In Hair Follicle Development WP3930	1/13	7.69	0.0813049	0.16434	12.8282	32.1929	RELB
Sudden Infant Death Syndrome SIDS Susceptibility Pathways WP706	3/157	1.91	0.0827797	0.166142	3.0242	7.5351	CXCL8;IL1B;NFKB2
Prolactin Signaling WP2037	2/74	2.7	0.0837015	0.166818	4.2964	10.6573	NFKBIA;NFKBIB
T Cell Receptor Signaling WP69	2/75	2.67	0.0856414	0.169499	4.2374	10.4137	NFKBIA;MAP3K14
Insulin Signaling WP481	3/160	1.88	0.0864612	0.169941	2.966	7.2609	MAP3K10;TRIB3;MAP3K14
Codeine And Morphine Metabolism WP1604	1/14	7.14	0.0872803	0.170376	11.8408	28.8753	ABCC2
Pro Survival Signaling Of Neuroprotectin D1 WP5182	1/15	6.67	0.0932172	0.180727	10.9945	26.0879	BIRC3
Classcl Pathway Steroidogenesis W Glucocort Mineralocort Metab WP4523	1/16	6.25	0.0991157	0.183428	10.261	23.7179	POR
Osteoclast Signaling WP12	1/16	6.25	0.0991157	0.183428	10.261	23.7179	SPP1
Tryptophan Catabolism Leading To NAD Production WP4210	1/16	6.25	0.0991157	0.183428	10.261	23.7179	KYNU
Quercetin And Nf kB AP 1 Induced Apoptosis WP2435	1/16	6.25	0.0991157	0.183428	10.261	23.7179	NFKBIA
ID Signaling WP53	1/16	6.25	0.0991157	0.183428	10.261	23.7179	ID3
8Q11 23 RB1CC1 Copy Number Variation WP5412	1/16	6.25	0.0991157	0.183428	10.261	23.7179	GABARAPL1
Sulfation Biotransformation Reaction WP692	1/16	6.25	0.0991157	0.183428	10.261	23.7179	GSR
Platelet Mediated Interactions W Vascular And Circulating Cells WP4462	1/17	5.88	0.104976	0.186989	9.6192	21.6819	IL1B
Cells And Molecules Involved In Acute Inflammatory Response WP4493	1/17	5.88	0.104976	0.186989	9.6192	21.6819	CXCL8
Iron Metabolism Disorders WP5172	1/17	5.88	0.104976	0.186989	9.6192	21.6819	FTL
Degradation Pathway Of Sphingolipids Including Diseases WP4153	1/17	5.88	0.104976	0.186989	9.6192	21.6819	GLA
Cori Cycle WP1946	1/17	5.88	0.104976	0.186989	9.6192	21.6819	TALDO1
Drug Induction Of Bile Acid Pathway WP2289	1/17	5.88	0.104976	0.186989	9.6192	21.6819	ABCC2
Clear Cell Renal Cell Carcinoma Pathways WP4018	2/85	2.35	0.105746	0.187191	3.725	8.3689	SDSL;SQSTM1
Genes Associated With The Development Of Rheumatoid Arthritis WP5033	1/18	5.56	0.110799	0.193728	9.0529	19.9167	TRAF1
Proteoglycan Biosynthesis WP4784	1/18	5.56	0.110799	0.193728	9.0529	19.9167	B3GAT3
Allograft Rejection WP2328	2/90	2.22	0.116232	0.201372	3.5124	7.5593	CXCL8;IL1B
Cholestasis WP5238	1/19	5.26	0.116584	0.201372	8.5495	18.3742	ABCC2
Amino Acid Metabolism WP3925	2/91	2.2	0.11836	0.203209	3.4728	7.411	GSR;GCLM
Lung Pathology Of COVID 19 WP5146	1/20	5	0.122331	0.207526	8.0991	17.0165	IL1B
Autophagy In Pancreatic Ductal Adenocarcinoma WP5331	1/20	5	0.122331	0.207526	8.0991	17.0165	SQSTM1
Glycosphingolipid Metabolism WP5292	1/21	4.76	0.128042	0.213403	7.6938	15.8138	GLA
Pathogenesis Of SARS CoV 2 Mediated By Nsp9 Nsp10 Complex WP4884	1/21	4.76	0.128042	0.213403	7.6938	15.8138	CXCL8
FOXA2 Pathway WP5066	1/21	4.76	0.128042	0.213403	7.6938	15.8138	ABCC2
NAD Metab In Oncogene Induced And Mt Dysfunction Senescence WP5046	1/22	4.55	0.133716	0.220283	7.3271	14.7423	IL1B
Vitamin D In Inflammatory Diseases WP4482	1/22	4.55	0.133716	0.220283	7.3271	14.7423	NFKBIA
Unfolded Protein Response WP4925	1/23	4.35	0.139353	0.22422	6.9937	13.7827	IL1B
Roles Of Ceramides In Development Of Insulin Resistance WP5181	1/23	4.35	0.139353	0.22422	6.9937	13.7827	TRAF1
Complement Activation WP545	1/23	4.35	0.139353	0.22422	6.9937	13.7827	C1S
Eicosanoid Synthesis WP167	1/23	4.35	0.139353	0.22422	6.9937	13.7827	AKR1C3
Focal Adhesion WP306	3/199	1.51	0.140039	0.22422	2.3711	4.6612	STYK1;SPP1;BIRC3
Circadian Rhythm Genes WP3594	3/201	1.49	0.14304	0.226987	2.3469	4.5639	SERPINE1;ID3;RELB
miRNA Regulation Of P53 Pathway In Prostate Cancer WP3982	1/24	4.17	0.144953	0.226987	6.6892	12.9192	SERPINE1
Estrogen Metabolism WP5276	1/24	4.17	0.144953	0.226987	6.6892	12.9192	AKR1C3
Kynurenine Pathway And Links To Cell Senescence WP5044	1/24	4.17	0.144953	0.226987	6.6892	12.9192	KYNU
Hypothesized Pathways In Pathogenesis Of Cardiovascular Disease WP3668	1/25	4	0.150518	0.234413	6.4102	12.1388	SERPINE1
CAMKK2 Pathway WP4874	2/110	1.82	0.160424	0.248484	2.8591	5.2319	HMOX1;SQSTM1
Photodynamic Therapy Induced Unfolded Protein Response WP3613	1/27	3.7	0.161539	0.248858	5.9165	10.7859	TRIB3
Interactions Immune Cells And miRNAs In Tumor Microenvironment WP4559	1/28	3.57	0.166996	0.25316	5.6971	10.1966	NFKB2
T Cell Receptor And Co Stimulatory Signaling WP2583	1/28	3.57	0.166996	0.25316	5.6971	10.1966	NFKBIA
Eicosanoid Metabolism Via Lipooxygenases LOX WP4721	1/28	3.57	0.166996	0.25316	5.6971	10.1966	PTGR1
Disorders Of Bile Acid Synthesis And Biliary Transport WP5176	1/29	3.45	0.172419	0.258628	5.4934	9.6564	ABCC2
One Carbon Metabolism WP241	1/29	3.45	0.172419	0.258628	5.4934	9.6564	GLRX
Matrix Metalloproteinases WP129	1/30	3.33	0.177806	0.264609	5.3037	9.1598	TIMP1
miRNA Regulation Of Prostate Cancer Signaling WP3981	1/31	3.23	0.183158	0.264609	5.1266	8.7019	NFKBIA
Eicosanoid Metabolism Via Cyclooxygenases COX WP4719	1/31	3.23	0.183158	0.264609	5.1266	8.7019	PTGR1
Constitutive Androstane Receptor Pathway WP2875	1/31	3.23	0.183158	0.264609	5.1266	8.7019	ABCC2
Effect Of Omega 3 PUFA On Huntington 39 S Disease Pathways WP5470	2/120	1.67	0.183532	0.264609	2.6155	4.4342	IL1B;MAP3K10
13Q12 12 Copy Number Variation WP5406	1/32	3.12	0.188476	0.264609	4.961	8.2788	TRAF1
Initiation Of Transcription And Translation Elongation HIV1 LTR WP3414	1/32	3.12	0.188476	0.264609	4.961	8.2788	NFKBIA
Pregnane X Receptor Pathway WP2876	1/32	3.12	0.188476	0.264609	4.961	8.2788	ABCC2
Prion Disease Pathway WP3995	1/32	3.12	0.188476	0.264609	4.961	8.2788	PRNP
Development And Heterogeneity Of The ILC Family WP3893	1/32	3.12	0.188476	0.264609	4.961	8.2788	IL1B
Monoamine Transport WP727	1/32	3.12	0.188476	0.264609	4.961	8.2788	IL1B
2Q11 2 Copy Number Variation Syndrome WP5221	1/32	3.12	0.188476	0.264609	4.961	8.2788	ANKRD39
Metabolic Pathways Of Fibroblasts WP5312	1/32	3.12	0.188476	0.264609	4.961	8.2788	SLC1A5
Host Pathogen Interaction Of Human CoV Interferon Induction WP4880	1/33	3.03	0.193759	0.26677	4.8057	7.8869	NFKBIA
Tryptophan Metabolism WP465	1/33	3.03	0.193759	0.26677	4.8057	7.8869	KYNU
Nuclear Receptors In Lipid Metabolism And Toxicity WP299	1/33	3.03	0.193759	0.26677	4.8057	7.8869	ABCC2
Mitochondrial Immune Response To SARS CoV 2 WP5038	1/33	3.03	0.193759	0.26677	4.8057	7.8869	NFKB2
P38 MAPK Signaling WP400	1/35	2.86	0.204224	0.277829	4.5226	7.1843	HSPB1
Influence Of Laminopathies On Wnt Signaling WP4844	1/35	2.86	0.204224	0.277829	4.5226	7.1843	SPP1
Ebola Virus Infection In Host WP4217	2/129	1.55	0.204716	0.277829	2.429	3.8527	NFKB2;RELB
Vitamin D Sensitive Calcium Signaling In Depression WP4698	1/36	2.78	0.209405	0.282846	4.3931	6.8686	GSR
Angiopoietin Like Protein 8 Regulatory Pathway WP3915	2/132	1.52	0.211839	0.284783	2.3726	3.6821	MAP3K10;MAP3K14
Photodynamic Therapy Induced HIF 1 Survival Signaling WP3614	1/37	2.7	0.214553	0.287078	4.2709	6.5737	SERPINE1
Type II Interferon Signaling WP619	1/38	2.63	0.219668	0.291188	4.1552	6.2979	IL1B
Parkinson 39 S Disease Pathway WP2371	1/38	2.63	0.219668	0.291188	4.1552	6.2979	UCHL1
Brain Derived Neurotrophic Factor BDNF Signaling WP2380	2/137	1.46	0.223763	0.295242	2.2841	3.4198	NFKBIA;SQSTM1
Bladder Cancer WP2828	1/40	2.5	0.229799	0.299053	3.9418	5.7966	CXCL8
ATM Signaling WP2516	1/40	2.5	0.229799	0.299053	3.9418	5.7966	NFKBIA
PDGF Pathway WP2526	1/40	2.5	0.229799	0.299053	3.9418	5.7966	NFKBIA
Neuroinflammation And Glutamatergic Signaling WP5083	2/140	1.43	0.230943	0.299176	2.2341	3.2743	IL1B;NFKB2
Metabolic Reprogramming In Pancreatic Cancer WP5220	1/42	2.38	0.239799	0.308062	3.7491	5.3535	SLC1A5
Alzheimer 39 S Disease WP5124	3/261	1.15	0.241045	0.308062	1.7956	2.5548	IL1B;ADRM1;TUBA4A
Alzheimer 39 S Disease And miRNA Effects WP2059	3/261	1.15	0.241045	0.308062	1.7956	2.5548	IL1B;ADRM1;TUBA4A
Fas Ligand Pathway And Stress Induction Of Heat Shock Proteins WP314	1/43	2.33	0.244751	0.311402	3.6597	5.151	HSPB1
Neurodegeneration W Brain Fe Accumulation NBIA Subtypes Pathway WP4577	1/44	2.27	0.24967	0.31485	3.5744	4.9598	FTL
Perturbations Host Cell Autophagy Induced By SARS CoV 2 Prots WP4936	1/44	2.27	0.24967	0.31485	3.5744	4.9598	SQSTM1
ATM Signaling In Development And Disease WP3878	1/47	2.13	0.26424	0.327872	3.3407	4.4462	HSPB1
Selenium Metabolism And Selenoproteins WP28	1/47	2.13	0.26424	0.327872	3.3407	4.4462	TXNRD1
Breast Cancer Pathway WP4262	2/154	1.3	0.264599	0.327872	2.0269	2.6949	GADD45B;NFKB2
Nonalcoholic Fatty Liver Disease WP4396	2/154	1.3	0.264599	0.327872	2.0269	2.6949	CXCL8;IL1B
Pancreatic Cancer Subtypes WP5390	1/48	2.08	0.269033	0.329542	3.2695	4.2926	ANXA10
Exercise Induced Circadian Regulation WP410	1/48	2.08	0.269033	0.329542	3.2695	4.2926	GSTM3
Smith Magenis And Potocki Lupski Syndrome Copy Number Variation WP5381	2/156	1.28	0.269415	0.329542	2.0004	2.6235	IL1B;MAP3K14
IL3 Signaling WP286	1/49	2.04	0.273796	0.333469	3.2012	4.1468	CXCL8
Photodynamic Therapy Induced AP 1 Survival Signaling WP3611	1/50	2	0.278528	0.336358	3.1357	4.0082	JUNB
IL4 Signaling WP395	1/50	2	0.278528	0.336358	3.1357	4.0082	NFKBIA
Copper Homeostasis WP3286	1/51	1.96	0.283229	0.340592	3.0729	3.8764	PRNP
Cardiac Hypertrophic Response WP2795	1/55	1.82	0.301732	0.358307	2.8447	3.4085	MAP3K14
Pathogenic Escherichia Coli Infection WP2272	1/55	1.82	0.301732	0.358307	2.8447	3.4085	TUBA4A
Hematopoietic SC Differentiation WP2849	1/55	1.82	0.301732	0.358307	2.8447	3.4085	IL1B
VEGFA VEGFR2 Signaling WP3888	4/430	0.93	0.306275	0.362192	1.449	1.7146	NFKBIA;CXCL8;DNAJB4;HSPB1
15Q11Q13 Copy Number Variation WP5407	1/58	1.72	0.315298	0.371322	2.6945	3.1101	NECAB3
2Q13 Copy Number Variation Syndrome WP5222	1/60	1.67	0.324196	0.38023	2.6029	2.932	IL1B
Proteasome Degradation WP183	1/62	1.61	0.33298	0.387656	2.5173	2.7683	UCHL1
Oxidation By Cytochrome P450 WP43	1/63	1.59	0.337329	0.387656	2.4766	2.6913	POR
Endochondral Ossification WP474	1/63	1.59	0.337329	0.387656	2.4766	2.6913	SPP1
Endochondral Ossification With Skeletal Dysplasias WP4808	1/63	1.59	0.337329	0.387656	2.4766	2.6913	SPP1
Endometrial Cancer WP4155	1/63	1.59	0.337329	0.387656	2.4766	2.6913	GADD45B
Vitamin D Receptor Pathway WP2877	2/186	1.08	0.341209	0.389481	1.6717	1.7975	SPP1;JUNB
3Q29 Copy Number Variation Syndrome WP4906	1/64	1.56	0.34165	0.389481	2.4372	2.6175	TM4SF19
AGE RAGE Pathway WP2324	1/66	1.52	0.350208	0.397646	2.362	2.4782	NFKBIA
AMP Activated Protein Kinase Signaling WP1403	1/67	1.49	0.354445	0.40085	2.3261	2.4126	CPT1C
RAC1 PAK1 P38 MMP2 Pathway WP3303	1/68	1.47	0.358656	0.40085	2.2912	2.3494	NFKBIA
PPAR Signaling WP3942	1/68	1.47	0.358656	0.40085	2.2912	2.3494	CPT1C
Melanoma WP4685	1/68	1.47	0.358656	0.40085	2.2912	2.3494	GADD45B
DNA Damage Response WP707	1/69	1.45	0.362839	0.40237	2.2574	2.2886	GADD45B
miRNA Regulation Of DNA Damage Response WP1530	1/69	1.45	0.362839	0.40237	2.2574	2.2886	GADD45B
Parkin Ubiquitin Proteasomal System Pathway WP2359	1/71	1.41	0.371123	0.409962	2.1927	2.1734	TUBA4A
Non Small Cell Lung Cancer WP4255	1/72	1.39	0.375226	0.412893	2.1617	2.119	GADD45B
Chromosomal And Microsatellite Instability In Colorectal Cancer WP4216	1/73	1.37	0.379301	0.41418	2.1316	2.0664	GADD45B
Head And Neck Squamous Cell Carcinoma WP4674	1/73	1.37	0.379301	0.41418	2.1316	2.0664	NFKB2
Extrafollicular And Follicular B Cell Activation By SARS CoV 2 WP5218	1/74	1.35	0.383351	0.417004	2.1023	2.0157	CD82
Clock Controlled Autophagy In Bone Metabolism WP5205	1/80	1.25	0.407102	0.441156	1.942	1.7453	SQSTM1
MicroRNAs In Cardiomyocyte Hypertrophy WP1544	1/83	1.2	0.418635	0.451935	1.8707	1.6289	MAP3K14
Acute Viral Myocarditis WP4298	1/85	1.18	0.4262	0.458366	1.826	1.5573	NFKB2
ADHD And Autism ASD Pathways WP5420	3/370	0.81	0.432913	0.463835	1.2553	1.051	KYNU;AKR1C1;AKR1C3
T Cell Activation SARS CoV 2 WP5098	1/88	1.14	0.437364	0.466849	1.7627	1.4578	NFKBIA
Pancreatic Adenocarcinoma Pathway WP4263	1/89	1.12	0.441037	0.469013	1.7426	1.4265	GADD45B
Metabolic Epileptic Disorders WP5355	1/92	1.09	0.451915	0.477021	1.6849	1.3382	SLC1A5
B Cell Receptor Signaling WP23	1/92	1.09	0.451915	0.477021	1.6849	1.3382	NFKBIA
Neural Crest Differentiation WP2064	1/101	0.99	0.483303	0.508271	1.5326	1.1143	NFKB2
7Q11 23 Copy Number Variation Syndrome WP4932	1/104	0.96	0.493364	0.516944	1.4877	1.0511	SQSTM1
Complement System In Neuronal Development And Plasticity WP5090	1/106	0.94	0.499964	0.52194	1.4592	1.0116	C1S
Thermogenesis WP4321	1/108	0.93	0.506478	0.526811	1.4318	0.974	CPT1C
DNA Damage Response Only ATM Dependent WP710	1/109	0.92	0.509703	0.528238	1.4185	0.9559	NFKB2
Senescence Associated Secretory Phenotype SASP WP3391	1/113	0.88	0.522396	0.539431	1.3675	0.888	CXCL8
Pleural Mesothelioma WP5087	3/437	0.69	0.542968	0.557523	1.0579	0.6461	IL1B;MAP3K10;SLC3A2
Cell Cycle WP179	1/120	0.83	0.54383	0.557523	1.2866	0.7837	GADD45B
TGF Beta Signaling Pathway WP366	1/132	0.76	0.578375	0.590813	1.1681	0.6395	JUNB
Hepatitis B Infection WP4666	1/151	0.66	0.627838	0.639049	1.0191	0.4744	CXCL8
Myometrial Relaxation And Contraction Pathways WP289	1/156	0.64	0.639867	0.648976	0.986	0.4402	IL1B
Primary Ovarian Insufficiency WP5316	1/170	0.59	0.671537	0.678681	0.9037	0.3598	SERPINE1
Ciliary Landscape WP4352	1/215	0.47	0.755768	0.761109	0.712	0.1994	GLA
Focal Adhesion PI3K Akt mTOR Signaling WP3932	1/303	0.33	0.863447	0.866487	0.5023	0.0737	SPP1
PI3K Akt Signaling WP4172	1/338	0.3	0.891716	0.891716	0.4493	0.0515	SPP1

## Sheet: KEGG_UP
KEGG 2021 Human | Common Upregulated DEGs (MM27 & MM13) | Sorted by Adjusted P-value | Bold = shown in figure
Top 20 sig. → orange | Other sig. → yellow | Bold = in figure (6) | Significant (adj.p<0.05): 20/157
Term	Overlap	Overlap (%)	P-value	Adjusted P-value	Odds Ratio	Combined Score	Genes
NF-kappa B signaling pathway	10/104	9.62	1.47626e-09	2.31773e-07	17.5319	356.49	NFKBIA;CXCL8;GADD45B;IL1B;TRAF1;MAP3K14;CXCL2;NFKB2;BIRC3;RELB
Ferroptosis	6/41	14.63	2.50533e-07	1.96668e-05	27.4217	416.8	PRNP;HMOX1;SLC3A2;SLC7A11;GCLM;FTL
TNF signaling pathway	8/112	7.14	6.92275e-07	3.62291e-05	12.4628	176.763	NFKBIA;CCL20;IL1B;TRAF1;JUNB;MAP3K14;CXCL2;BIRC3
Osteoclast differentiation	7/127	5.51	1.95009e-05	0.000765411	9.3665	101.581	NFKBIA;IL1B;JUNB;SQSTM1;MAP3K14;NFKB2;RELB
Legionellosis	5/57	8.77	3.42964e-05	0.00107691	15.2446	156.722	NFKBIA;CXCL8;IL1B;CXCL2;NFKB2
Epithelial cell signaling in Helicobacter pylori infection	5/70	7.14	9.26691e-05	0.00242484	12.1877	113.181	NFKBIA;ATP6V0B;CXCL8;CXCL2;MAP3K14
NOD-like receptor signaling pathway	7/181	3.87	0.000183477	0.00411513	6.442	55.4234	NFKBIA;GABARAPL1;CXCL8;IL1B;CXCL2;NFKBIB;BIRC3
Apoptosis	6/142	4.23	0.000333912	0.00529772	7.0211	56.2014	NFKBIA;GADD45B;TRAF1;MAP3K14;TUBA4A;BIRC3
Rheumatoid arthritis	5/93	5.38	0.000353256	0.00529772	8.9918	71.4698	ATP6V0B;CXCL8;CCL20;IL1B;CXCL2
Epstein-Barr virus infection	7/202	3.47	0.000358005	0.00529772	5.7421	45.5636	NFKBIA;GADD45B;ADRM1;MAP3K14;NFKB2;NFKBIB;RELB
IL-17 signaling pathway	5/94	5.32	0.000371178	0.00529772	8.8903	70.2233	NFKBIA;CXCL8;CCL20;IL1B;CXCL2
C-type lectin receptor signaling pathway	5/104	4.81	0.000590547	0.00772633	7.9883	59.3886	NFKBIA;IL1B;MAP3K14;NFKB2;RELB
Chemokine signaling pathway	6/192	3.12	0.00161312	0.0194815	5.1207	32.924	NFKBIA;CXCL8;CCL20;CXCL2;NFKBIB;CCL26
Small cell lung cancer	4/92	4.35	0.00306302	0.0343496	7.1364	41.3078	NFKBIA;GADD45B;TRAF1;BIRC3
Viral protein interaction with cytokine and cytokine receptor	4/100	4	0.00413101	0.0409373	6.539	35.8942	CXCL8;CCL20;CXCL2;CCL26
Amoebiasis	4/102	3.92	0.0044327	0.0409373	6.4049	34.7067	CXCL8;IL1B;HSPB1;CXCL2
Chagas disease	4/102	3.92	0.0044327	0.0409373	6.4049	34.7067	NFKBIA;CXCL8;IL1B;SERPINE1
Toll-like receptor signaling pathway	4/104	3.85	0.0047489	0.041421	6.2762	33.5766	NFKBIA;CXCL8;IL1B;SPP1
Shigellosis	6/246	2.44	0.0054734	0.0452275	3.9577	20.6109	NFKBIA;GABARAPL1;CXCL8;IL1B;SQSTM1;NFKBIB
Glutathione metabolism	3/57	5.26	0.00607944	0.0477236	8.6684	44.2336	GSTM3;GSR;GCLM
Pathways in cancer	9/531	1.69	0.00792456	0.0572454	2.7569	13.3374	NFKBIA;GSTM3;CXCL8;GADD45B;TXNRD1;HMOX1;TRAF1;NFKB2;BIRC3
Cytosolic DNA-sensing pathway	3/63	4.76	0.00802165	0.0572454	7.7992	37.636	NFKBIA;IL1B;NFKBIB
Transcriptional misregulation in cancer	5/192	2.6	0.00843356	0.0575682	4.2103	20.1063	CXCL8;GADD45B;NUPR1;TRAF1;BIRC3
Pathogenic Escherichia coli infection	5/197	2.54	0.00936153	0.06124	4.0996	19.1498	NFKBIA;CXCL8;IL1B;TUBA4A;NFKBIB
Adipocytokine signaling pathway	3/69	4.35	0.0102901	0.0646155	7.088	32.4389	NFKBIA;CPT1C;NFKBIB
RIG-I-like receptor signaling pathway	3/70	4.29	0.0107007	0.0646155	6.9819	31.68	NFKBIA;CXCL8;NFKBIB
p53 signaling pathway	3/73	4.11	0.0119887	0.0655164	6.6817	29.5583	CD82;GADD45B;SERPINE1
Pathways of neurodegeneration	8/475	1.68	0.0125012	0.0655164	2.7245	11.9384	PRNP;GABARAPL1;UCHL1;IL1B;ADRM1;MAP3K10;SQSTM1;TUBA4A
MAPK signaling pathway	6/294	2.04	0.0125474	0.0655164	3.29	14.4043	GADD45B;IL1B;HSPB1;MAP3K14;NFKB2;RELB
Cytokine-cytokine receptor interaction	6/295	2.03	0.0127416	0.0655164	3.2784	14.3034	CXCL8;CCL20;IL1B;IL13RA2;CXCL2;CCL26
Fluid shear stress and atherosclerosis	4/139	2.88	0.0129364	0.0655164	4.6408	20.1769	GSTM3;IL1B;HMOX1;SQSTM1
Pertussis	3/76	3.95	0.0133621	0.0655577	6.4061	27.6445	CXCL8;C1S;IL1B
Leishmaniasis	3/77	3.9	0.013839	0.06584	6.3192	27.0479	NFKBIA;IL1B;NFKBIB
Coronavirus disease	5/232	2.16	0.0178879	0.0807491	3.4613	13.9271	NFKBIA;CXCL8;C1S;IL1B;NFKBIB
Complement and coagulation cascades	3/85	3.53	0.0180014	0.0807491	5.7004	22.9003	SERPINB2;C1S;SERPINE1
Cellular senescence	4/156	2.56	0.0189683	0.0827231	4.1182	16.3286	CXCL8;GADD45B;SERPINE1;SQSTM1
Necroptosis	4/159	2.52	0.0201859	0.0839361	4.0379	15.759	IL1B;SQSTM1;FTL;BIRC3
PD-L1 expression and PD-1 checkpoint pathway in cancer	3/89	3.37	0.0203157	0.0839361	5.4342	21.1735	NFKBIA;BATF2;NFKBIB
Mucin type O-glycan biosynthesis	2/36	5.56	0.0228673	0.0920182	9.1158	34.4399	GCNT3;ST6GALNAC4
Salmonella infection	5/249	2.01	0.0234441	0.0920182	3.2174	12.0753	NFKBIA;CXCL8;IL1B;TUBA4A;BIRC3
Hepatocellular carcinoma	4/168	2.38	0.0241234	0.0923749	3.8146	14.2076	GSTM3;GADD45B;TXNRD1;HMOX1
Influenza A	4/172	2.33	0.0260125	0.0972372	3.723	13.5858	NFKBIA;CXCL8;IL1B;NFKBIB
AGE-RAGE signaling pathway in diabetic complications	3/100	3	0.027486	0.100356	4.8152	17.3064	CXCL8;IL1B;SERPINE1
Protein digestion and absorption	3/103	2.91	0.0296463	0.105784	4.6701	16.4313	COL27A1;SLC3A2;SLC1A5
T cell receptor signaling pathway	3/104	2.88	0.0303859	0.106013	4.6236	16.1539	NFKBIA;MAP3K14;NFKBIB
Th17 cell differentiation	3/107	2.8	0.0326625	0.111479	4.4896	15.3611	NFKBIA;IL1B;NFKBIB
HIF-1 signaling pathway	3/109	2.75	0.0342285	0.113182	4.4044	14.8635	SERPINE1;HMOX1;TIMP1
Glycosphingolipid biosynthesis	2/45	4.44	0.0346035	0.113182	7.2046	24.2348	GLA;ST6GALNAC4
Toxoplasmosis	3/112	2.68	0.0366494	0.117329	4.2825	14.1596	NFKBIA;NFKBIB;BIRC3
Kaposi sarcoma-associated herpesvirus infection	4/193	2.07	0.0373661	0.117329	3.3058	10.8661	NFKBIA;GABARAPL1;CXCL8;CXCL2
Cysteine and methionine metabolism	2/50	4	0.0419323	0.126603	6.4525	20.4653	SDSL;GCLM
Malaria	2/50	4	0.0419323	0.126603	6.4525	20.4653	CXCL8;IL1B
Glycosaminoglycan biosynthesis	2/53	3.77	0.0465833	0.137992	6.072	18.6199	CHPF2;B3GAT3
Lipid and atherosclerosis	4/215	1.86	0.0518829	0.150845	2.9578	8.7514	NFKBIA;CXCL8;IL1B;CXCL2
Human T-cell leukemia virus 1 infection	4/219	1.83	0.0548107	0.15646	2.9022	8.4275	NFKBIA;MAP3K14;NFKB2;RELB
Mineral absorption	2/60	3.33	0.0581186	0.159898	5.3373	15.186	HMOX1;FTL
Steroid hormone biosynthesis	2/61	3.28	0.05984	0.159898	5.2466	14.7747	AKR1C1;AKR1C3
Apelin signaling pathway	3/137	2.19	0.0600891	0.159898	3.4791	9.7831	GABARAPL1;SERPINE1;SPP1
Yersinia infection	3/137	2.19	0.0600891	0.159898	3.4791	9.7831	NFKBIA;CXCL8;IL1B
Measles	3/139	2.16	0.0622072	0.162776	3.4276	9.5195	NFKBIA;IL1B;NFKBIB
Mitophagy	2/68	2.94	0.0723619	0.186243	4.6884	12.3122	GABARAPL1;SQSTM1
Chronic myeloid leukemia	2/76	2.63	0.0875949	0.218292	4.1799	10.1782	NFKBIA;GADD45B
Metabolism of xenobiotics by cytochrome P450	2/76	2.63	0.0875949	0.218292	4.1799	10.1782	GSTM3;AKR1C1
Hippo signaling pathway	3/163	1.84	0.0902113	0.2213	2.9099	7.0002	SERPINE1;AFP;BIRC3
B cell receptor signaling pathway	2/81	2.47	0.0975573	0.235638	3.9144	9.1099	NFKBIA;NFKBIB
Prion disease	4/273	1.47	0.102673	0.244238	2.3132	5.2653	PRNP;IL1B;ADRM1;TUBA4A
Selenocompound metabolism	1/17	5.88	0.104976	0.245989	9.6192	21.6819	TXNRD1
Th1 and Th2 cell differentiation	2/92	2.17	0.120498	0.278209	3.434	7.2668	NFKBIA;NFKBIB
Viral carcinogenesis	3/203	1.48	0.146062	0.332345	2.3232	4.4692	NFKBIA;TRAF1;NFKB2
Insulin resistance	2/108	1.85	0.155871	0.34506	2.9133	5.4151	NFKBIA;TRIB3
Folate biosynthesis	1/26	3.85	0.156046	0.34506	6.1535	11.4307	AKR1C3
Pentose phosphate pathway	1/30	3.33	0.177806	0.383411	5.3037	9.1598	TALDO1
Human cytomegalovirus infection	3/225	1.33	0.180595	0.383411	2.0907	3.5782	NFKBIA;CXCL8;IL1B
Neurotrophin signaling pathway	2/119	1.68	0.181199	0.383411	2.638	4.506	NFKBIA;NFKBIB
Galactose metabolism	1/31	3.23	0.183158	0.383411	5.1266	8.7019	GLA
Lysosome	2/128	1.56	0.202348	0.418008	2.4484	3.912	ATP6V0B;GLA
FoxO signaling pathway	2/131	1.53	0.209462	0.421061	2.3911	3.7378	GABARAPL1;GADD45B
Amyotrophic lateral sclerosis	4/364	1.1	0.212537	0.421061	1.7205	2.6644	GABARAPL1;ADRM1;SQSTM1;TUBA4A
African trypanosomiasis	1/37	2.7	0.214553	0.421061	4.2709	6.5737	IL1B
Thyroid cancer	1/37	2.7	0.214553	0.421061	4.2709	6.5737	GADD45B
Parkinson disease	3/249	1.2	0.22047	0.42733	1.8844	2.8492	UCHL1;ADRM1;TUBA4A
Autophagy	2/137	1.46	0.223763	0.428424	2.2841	3.4198	GABARAPL1;SQSTM1
Glycine, serine and threonine metabolism	1/40	2.5	0.229799	0.431751	3.9418	5.7966	SDSL
Bladder cancer	1/41	2.44	0.234815	0.431751	3.843	5.5684	CXCL8
Tryptophan metabolism	1/42	2.38	0.239799	0.431751	3.7491	5.3535	KYNU
Graft-versus-host disease	1/42	2.38	0.239799	0.431751	3.7491	5.3535	IL1B
Type I diabetes mellitus	1/43	2.33	0.244751	0.431751	3.6597	5.151	IL1B
Fatty acid degradation	1/43	2.33	0.244751	0.431751	3.6597	5.151	CPT1C
Porphyrin and chlorophyll metabolism	1/43	2.33	0.244751	0.431751	3.6597	5.151	HMOX1
Breast cancer	2/147	1.36	0.247749	0.432185	2.1255	2.9658	GADD45B;NFKB2
ABC transporters	1/45	2.22	0.254558	0.438557	3.493	4.7791	ABCC2
Proteasome	1/46	2.17	0.259415	0.438557	3.4152	4.6082	ADRM1
Phagosome	2/152	1.32	0.259782	0.438557	2.0542	2.7688	ATP6V0B;TUBA4A
Non-alcoholic fatty liver disease	2/155	1.29	0.267007	0.444613	2.0136	2.6589	CXCL8;IL1B
Intestinal immune network for IgA production	1/48	2.08	0.269033	0.444613	3.2695	4.2926	MAP3K14
Sphingolipid metabolism	1/49	2.04	0.273796	0.447771	3.2012	4.1468	GLA
Vibrio cholerae infection	1/50	2	0.278528	0.450161	3.1357	4.0082	ATP6V0B
Ovarian steroidogenesis	1/51	1.96	0.283229	0.450161	3.0729	3.8764	AKR1C3
Hepatitis B	2/162	1.23	0.283859	0.450161	1.9248	2.4239	NFKBIA;CXCL8
Endometrial cancer	1/58	1.72	0.315298	0.491338	2.6945	3.1101	GADD45B
VEGF signaling pathway	1/59	1.69	0.319762	0.491338	2.648	3.0191	HSPB1
Huntington disease	3/306	0.98	0.320293	0.491338	1.5255	1.7368	ADRM1;MAP3K10;TUBA4A
Tuberculosis	2/180	1.11	0.326971	0.491338	1.7286	1.9324	ATP6V0B;IL1B
Arachidonic acid metabolism	1/61	1.64	0.328602	0.491338	2.5594	2.8484	AKR1C3
Glycerolipid metabolism	1/61	1.64	0.328602	0.491338	2.5594	2.8484	GLA
Basal cell carcinoma	1/63	1.59	0.337329	0.499628	2.4766	2.6913	GADD45B
GnRH secretion	1/64	1.56	0.34165	0.501299	2.4372	2.6175	SPP1
Inflammatory bowel disease	1/65	1.54	0.345943	0.502898	2.399	2.5465	IL1B
Central carbon metabolism in cancer	1/70	1.43	0.366994	0.527586	2.2246	2.2299	SLC1A5
Melanoma	1/72	1.39	0.375226	0.527586	2.1617	2.119	GADD45B
Non-small cell lung cancer	1/72	1.39	0.375226	0.527586	2.1617	2.119	GADD45B
Focal adhesion	2/201	1	0.376367	0.527586	1.5445	1.5093	SPP1;BIRC3
PPAR signaling pathway	1/74	1.35	0.383351	0.528849	2.1023	2.0157	CPT1C
Thyroid hormone synthesis	1/75	1.33	0.387374	0.528849	2.0737	1.9667	GSR
Glioma	1/75	1.33	0.387374	0.528849	2.0737	1.9667	GADD45B
Pancreatic cancer	1/76	1.32	0.391371	0.5297	2.046	1.9193	GADD45B
Synaptic vesicle cycle	1/78	1.28	0.399288	0.535796	1.9927	1.8294	ATP6V0B
Colorectal cancer	1/86	1.16	0.429945	0.567488	1.8044	1.5231	GADD45B
Alzheimer disease	3/369	0.81	0.431193	0.567488	1.2588	1.0589	IL1B;ADRM1;TUBA4A
ECM-receptor interaction	1/88	1.14	0.437364	0.567488	1.7627	1.4578	SPP1
Gap junction	1/88	1.14	0.437364	0.567488	1.7627	1.4578	TUBA4A
GABAergic synapse	1/89	1.12	0.441037	0.567564	1.7426	1.4265	GABARAPL1
Bile secretion	1/90	1.11	0.444686	0.567608	1.7229	1.3962	ABCC2
TGF-beta signaling pathway	1/94	1.06	0.45905	0.581003	1.6485	1.2835	ID3
Staphylococcus aureus infection	1/95	1.05	0.462582	0.581003	1.6309	1.2573	C1S
Prostate cancer	1/97	1.03	0.469579	0.58444	1.5967	1.207	NFKBIA
Inflammatory mediator regulation of TRP channels	1/98	1.02	0.473044	0.58444	1.5802	1.1829	IL1B
Hematopoietic cell lineage	1/99	1.01	0.476486	0.58444	1.564	1.1594	IL1B
Glucagon signaling pathway	1/107	0.93	0.503231	0.607	1.4454	0.9925	CPT1C
Drug metabolism	1/108	0.93	0.506478	0.607	1.4318	0.974	GSTM3
Ribosome biogenesis in eukaryotes	1/108	0.93	0.506478	0.607	1.4318	0.974	RPP25L
Growth hormone synthesis, secretion and action	1/119	0.84	0.540827	0.641965	1.2976	0.7976	JUNB
AMPK signaling pathway	1/120	0.83	0.54383	0.641965	1.2866	0.7837	CPT1C
Cell cycle	1/124	0.81	0.555646	0.651018	1.2445	0.7313	GADD45B
Relaxin signaling pathway	1/129	0.78	0.56999	0.662878	1.1956	0.6721	NFKBIA
Oxidative phosphorylation	1/133	0.75	0.581134	0.670868	1.1591	0.6292	ATP6V0B
Systemic lupus erythematosus	1/135	0.74	0.586598	0.672233	1.1417	0.609	C1S
Ubiquitin mediated proteolysis	1/140	0.71	0.59995	0.681554	1.1004	0.5622	BIRC3
Signaling pathways regulating pluripotency of stem cells	1/143	0.7	0.607755	0.681554	1.077	0.5363	ID3
Spinocerebellar ataxia	1/143	0.7	0.607755	0.681554	1.077	0.5363	ADRM1
Phospholipase D signaling pathway	1/148	0.68	0.620429	0.688716	1.0401	0.4965	CXCL8
Gastric cancer	1/149	0.67	0.622915	0.688716	1.033	0.489	GADD45B
Herpes simplex virus 1 infection	3/498	0.6	0.631797	0.689486	0.9246	0.4246	NFKBIA;IL1B;BIRC3
mTOR signaling pathway	1/154	0.65	0.635103	0.689486	0.999	0.4535	SLC3A2
Human papillomavirus infection	2/331	0.6	0.636786	0.689486	0.928	0.4188	ATP6V0B;SPP1
Hepatitis C	1/157	0.64	0.642227	0.690614	0.9796	0.4338	NFKBIA
JAK-STAT signaling pathway	1/162	0.62	0.653795	0.698271	0.949	0.4033	IL13RA2
Tight junction	1/169	0.59	0.669369	0.709861	0.9091	0.3649	TUBA4A
Protein processing in endoplasmic reticulum	1/171	0.58	0.67369	0.709861	0.8983	0.3548	FBXO6
RNA transport	1/186	0.54	0.704358	0.737228	0.8248	0.2891	RPP25L
Diabetic cardiomyopathy	1/203	0.49	0.73567	0.764902	0.7548	0.2317	GSR
Human immunodeficiency virus 1 infection	1/212	0.47	0.75089	0.775591	0.7223	0.2069	NFKBIA
cAMP signaling pathway	1/216	0.46	0.757373	0.777174	0.7087	0.1969	NFKBIA
Thermogenesis	1/232	0.43	0.781671	0.796898	0.659	0.1623	CPT1C
Chemical carcinogenesis	1/239	0.42	0.791527	0.80174	0.6394	0.1495	GSTM3
MicroRNAs in cancer	1/310	0.32	0.869633	0.875207	0.4907	0.0685	HMOX1
PI3K-Akt signaling pathway	1/354	0.28	0.902624	0.902624	0.4286	0.0439	SPP1

## Sheet: MSigDB_Hallmark_UP
MSigDB Hallmark 2020 | Common Upregulated DEGs (MM27 & MM13) | Sorted by Adjusted P-value | Bold = shown in figure
Top 20 sig. → orange | Other sig. → yellow | Bold = in figure (5) | Significant (adj.p<0.05): 15/40
Term	Overlap	Overlap (%)	P-value	Adjusted P-value	Odds Ratio	Combined Score	Genes
TNF-alpha Signaling via NF-kB	15/200	7.5	3.63796e-12	1.45519e-10	13.879	365.566	SERPINB2;GADD45B;CCL20;SERPINE1;TRAF1;CXCL2;NFKB2;RELB;NFKBIA;KYNU;IL1B;DNAJB4;JUNB;SQSTM1;BIRC3
mTORC1 Signaling	13/200	6.5	6.35102e-10	1.23232e-08	11.6952	247.672	TXNRD1;GSR;GLRX;SLC1A5;SLC7A11;TUBA4A;MLLT11;SLC6A6;TRIB3;NUPR1;SQSTM1;GLA;NFKBIB
Reactive Oxygen Species Pathway	8/49	16.33	9.24238e-10	1.23232e-08	31.7137	659.71	PRNP;SRXN1;TXNRD1;GSR;GLRX;GCLM;JUNB;FTL
Xenobiotic Metabolism	12/200	6	7.38326e-09	7.38326e-08	10.6466	199.347	SLC6A6;GABARAPL1;POR;ABCC2;SERTAD1;KYNU;SERPINE1;GSR;AKR1C3;HMOX1;SLC1A5;PTGR1
Apoptosis	8/161	4.97	1.04755e-05	8.38043e-05	8.4504	96.8968	GADD45B;IL1B;GSR;HMOX1;HSPB1;TIMP1;SQSTM1;BIRC3
Inflammatory Response	8/200	4	4.98102e-05	0.00028463	6.7206	66.5832	NFKBIA;CXCL8;CD82;CCL20;IL1B;SERPINE1;ADRM1;TIMP1
p53 Pathway	8/200	4	4.98102e-05	0.00028463	6.7206	66.5832	CD82;ABHD4;OSGIN1;HMOX1;TRIB3;SLC3A2;NUPR1;SLC7A11
IL-2/STAT5 Signaling	7/199	3.52	0.00032709	0.00149843	5.8327	46.8093	PRNP;GABARAPL1;SYNGR2;GADD45B;SPP1;SLC1A5;TRAF1
KRAS Signaling Up	7/200	3.5	0.000337147	0.00149843	5.8022	46.3887	CCL20;IL1B;SPP1;ANXA10;GLRX;TRAF1;BIRC3
UV Response Up	6/158	3.8	0.000588824	0.0023553	6.277	46.6841	NFKBIA;HMOX1;JUNB;SQSTM1;CXCL2;TUBA4A
Epithelial Mesenchymal Transition	6/200	3	0.00198239	0.00720869	4.9075	30.5419	CXCL8;GADD45B;PCOLCE2;SERPINE1;SPP1;TIMP1
TGF-beta Signaling	3/54	5.56	0.00522682	0.0174227	9.1797	48.2298	SERPINE1;ID3;JUNB
Complement	5/200	2.5	0.0099509	0.0284311	4.0359	18.6059	SERPINB2;C1S;KYNU;SERPINE1;TIMP1
Glycolysis	5/200	2.5	0.0099509	0.0284311	4.0359	18.6059	CHPF2;B3GAT3;SPAG4;TALDO1;GLRX
Coagulation	4/138	2.9	0.0126261	0.0336697	4.6757	20.442	SERPINB2;C1S;SERPINE1;TIMP1
Angiogenesis	2/36	5.56	0.0228673	0.0571683	9.1158	34.4399	SPP1;TIMP1
PI3K/AKT/mTOR Signaling	3/105	2.86	0.0311351	0.073259	4.578	15.8832	TRIB3;SQSTM1;NFKBIB
Apical Surface	2/44	4.55	0.0332042	0.0737871	7.3765	25.1175	GSTM3;HSPB1
Hypoxia	4/200	2	0.0416931	0.0794155	3.1866	10.1251	SLC6A6;SERPINE1;HMOX1;GLRX
Adipogenesis	4/200	2	0.0416931	0.0794155	3.1866	10.1251	POR;HSPB8;TALDO1;SLC1A5
Myogenesis	4/200	2	0.0416931	0.0794155	3.1866	10.1251	PRNP;SYNGR2;GADD45B;HSPB8
Spermatogenesis	3/135	2.22	0.0580058	0.105465	3.5322	10.057	GSTM3;TALDO1;IL13RA2
Cholesterol Homeostasis	2/74	2.7	0.0837015	0.145568	4.2964	10.6573	FBXO6;TRIB3
IL-6/JAK/STAT3 Signaling	2/87	2.3	0.109909	0.183181	3.6369	8.0308	IL1B;HMOX1
Interferon Alpha Response	2/97	2.06	0.131327	0.202196	3.2525	6.6027	BATF2;C1S
Androgen Response	2/100	2	0.137929	0.202196	3.1524	6.245	GSR;ADRM1
Interferon Gamma Response	3/200	1.5	0.141537	0.202196	2.359	4.6122	NFKBIA;BATF2;C1S
heme Metabolism	3/200	1.5	0.141537	0.202196	2.359	4.6122	SLC7A11;GCLM;CLIC2
DNA Repair	2/150	1.33	0.254967	0.351679	2.0821	2.8455	BRF2;ADRM1
Estrogen Response Early	2/200	1	0.374046	0.453389	1.5524	1.5266	HSPB8;GLA
Estrogen Response Late	2/200	1	0.374046	0.453389	1.5524	1.5266	HSPB8;GLA
Oxidative Phosphorylation	2/200	1	0.374046	0.453389	1.5524	1.5266	POR;ATP6V0B
Allograft Rejection	2/200	1	0.374046	0.453389	1.5524	1.5266	IL1B;TIMP1
Protein Secretion	1/96	1.04	0.466092	0.548344	1.6136	1.2318	GLA
Bile Acid Metabolism	1/112	0.89	0.519254	0.593433	1.3799	0.9043	GCLM
UV Response Dn	1/144	0.69	0.610323	0.678137	1.0694	0.528	SERPINE1
Fatty Acid Metabolism	1/158	0.63	0.644571	0.696833	0.9733	0.4275	GABARAPL1
Mitotic Spindle	1/199	0.5	0.728612	0.730394	0.7702	0.2439	TUBA4A
Apical Junction	1/200	0.5	0.730394	0.730394	0.7663	0.2407	TRAF1
KRAS Signaling Dn	1/200	0.5	0.730394	0.730394	0.7663	0.2407	SERPINB2

## Sheet: NCI_Nature_DN
NCI-Nature 2016 | Common Downregulated DEGs (MM27 & MM13) | Sorted by Adjusted P-value | Bold = shown in figure
Top 20 sig. → blue | Other sig. → grey | Bold = in figure (2) | Significant (adj.p<0.05): 6/34
Term	Overlap	Overlap (%)	P-value	Adjusted P-value	Odds Ratio	Combined Score	Genes
FOXM1 transcription factor network Homo sapiens c51cda49-6192-11e5-8ac5-06603eb7f303	4/40	10	6.16807e-06	0.000209714	39.4921	473.752	CCNA2;CENPF;PLK1;CENPA
Aurora A signaling Homo sapiens f131cf8e-618b-11e5-8ac5-06603eb7f303	3/31	9.68	0.000108675	0.00184748	37.4286	341.616	TPX2;CENPA;DLGAP5
PLK1 signaling events Homo sapiens e5e87977-6194-11e5-8ac5-06603eb7f303	3/46	6.52	0.000355456	0.00402851	24.3537	193.42	TPX2;PLK1;KIF20A
ATR signaling pathway Homo sapiens 8991cbac-618b-11e5-8ac5-06603eb7f303	2/39	5.13	0.00610651	0.0415243	18.5489	94.5698	CCNA2;PLK1
Aurora B signaling Homo sapiens 304a75af-618c-11e5-8ac5-06603eb7f303	2/39	5.13	0.00610651	0.0415243	18.5489	94.5698	KIF20A;CENPA
Hedgehog signaling events mediated by Gli proteins Homo sapiens 153b6970-6193-11e5-8ac5-06603eb7f303	2/47	4.26	0.00877271	0.049712	15.2452	72.203	GLI3;MTSS1
p73 transcription factor network Homo sapiens a88c505e-6194-11e5-8ac5-06603eb7f303	2/78	2.56	0.0229686	0.107135	9.0127	34.0106	CCNA2;PLK1
C-MYB transcription factor network Homo sapiens 61020228-618e-11e5-8ac5-06603eb7f303	2/82	2.44	0.0252082	0.107135	8.5603	31.5071	MYB;KIT
LPA4-mediated signaling events Homo sapiens 53b0602f-6194-11e5-8ac5-06603eb7f303	1/15	6.67	0.0440821	0.166532	24.1235	75.3063	RPS6KA5
Signaling events mediated by PRL Homo sapiens bb67523a-6195-11e5-8ac5-06603eb7f303	1/23	4.35	0.0668054	0.193657	15.3451	41.5235	CCNA2
Calcium signaling in the CD4+ TCR pathway Homo sapiens 5294f70b-618f-11e5-8ac5-06603eb7f303	1/29	3.45	0.0834985	0.193657	12.0533	29.9274	RCAN2
IL2 signaling events mediated by STAT5 Homo sapiens 9938526b-6193-11e5-8ac5-06603eb7f303	1/30	3.33	0.086252	0.193657	11.6371	28.5164	CCNA2
Regulation of p38-alpha and p38-beta Homo sapiens 3062ca15-6195-11e5-8ac5-06603eb7f303	1/30	3.33	0.086252	0.193657	11.6371	28.5164	PAK3
Trk receptor signaling mediated by the MAPK pathway Homo sapiens 4980bb81-6196-11e5-8ac5-06603eb7f303	1/34	2.94	0.0971848	0.193657	10.2244	23.8346	RPS6KA5
Validated transcriptional targets of AP1 family members Fra1 and Fra2 Homo sapiens 76d028a7-6196-11e5-8ac5-06603eb7f303	1/35	2.86	0.0998979	0.193657	9.9232	22.8592	CCNA2
IL2 signaling events mediated by PI3K Homo sapiens 8bbf39aa-6193-11e5-8ac5-06603eb7f303	1/35	2.86	0.0998979	0.193657	9.9232	22.8592	MYB
Signaling mediated by p38-alpha and p38-beta Homo sapiens e9dd8c21-6195-11e5-8ac5-06603eb7f303	1/38	2.63	0.107989	0.193657	9.1173	20.2925	RPS6KA5
FOXA1 transcription factor network Homo sapiens aa3927b7-6192-11e5-8ac5-06603eb7f303	1/44	2.27	0.123957	0.193657	7.8427	16.3742	NFIB
Validated transcriptional targets of deltaNp63 isoforms Homo sapiens 7d7360a8-6196-11e5-8ac5-06603eb7f303	1/45	2.22	0.126591	0.193657	7.6641	15.8401	TOP2A
Notch-mediated HES/HEY network Homo sapiens 8ee56389-6194-11e5-8ac5-06603eb7f303	1/48	2.08	0.134446	0.193657	7.1738	14.3949	MYB
FoxO family signaling Homo sapiens d06dbbda-6192-11e5-8ac5-06603eb7f303	1/48	2.08	0.134446	0.193657	7.1738	14.3949	PLK1
Signaling events mediated by Stem cell factor receptor (c-Kit) Homo sapiens c6b6861c-6195-11e5-8ac5-06603eb7f303	1/52	1.92	0.144812	0.193657	6.6098	12.7723	KIT
Role of Calcineurin-dependent NFAT signaling in lymphocytes Homo sapiens 61bdd46d-6195-11e5-8ac5-06603eb7f303	1/53	1.89	0.147384	0.193657	6.4824	12.4119	RCAN2
Validated transcriptional targets of TAp63 isoforms Homo sapiens 82e8ee19-6196-11e5-8ac5-06603eb7f303	1/53	1.89	0.147384	0.193657	6.4824	12.4119	PLK1
Caspase Cascade in Apoptosis Homo sapiens b9d3ef2e-618f-11e5-8ac5-06603eb7f303	1/55	1.82	0.152506	0.193657	6.2417	11.7378	LMNB1
p53 pathway Homo sapiens a0de862d-6194-11e5-8ac5-06603eb7f303	1/57	1.75	0.157597	0.193657	6.0182	11.1198	CCNA2
ATF-2 transcription factor network Homo sapiens c76c900a-618a-11e5-8ac5-06603eb7f303	1/58	1.72	0.160132	0.193657	5.9123	10.8299	CCNA2
Coregulation of Androgen receptor activity Homo sapiens 27e0e369-6191-11e5-8ac5-06603eb7f303	1/59	1.69	0.162659	0.193657	5.8101	10.5516	HNRNPA1
IL4-mediated signaling events Homo sapiens cff33f50-6193-11e5-8ac5-06603eb7f303	1/60	1.67	0.165178	0.193657	5.7113	10.2845	MYB
Regulation of retinoblastoma protein Homo sapiens 407a3468-6195-11e5-8ac5-06603eb7f303	1/64	1.56	0.175182	0.198539	5.3476	9.3151	CCNA2
AP-1 transcription factor network Homo sapiens 3ce2f9c5-6189-11e5-8ac5-06603eb7f303	1/69	1.45	0.18752	0.205667	4.9531	8.2909	MYB
E2F transcription factor network Homo sapiens bb4d0fd3-6191-11e5-8ac5-06603eb7f303	1/72	1.39	0.194836	0.207014	4.7431	7.7579	CCNA2
Validated targets of C-MYC transcriptional activation Homo sapiens 61d3b115-6196-11e5-8ac5-06603eb7f303	1/79	1.27	0.211656	0.21807	4.3159	6.7018	PEG10
ErbB1 downstream signaling Homo sapiens 30d60550-6192-11e5-8ac5-06603eb7f303	1/105	0.95	0.271157	0.271157	3.2327	4.2189	RPS6KA5

## Sheet: KEA_DN
KEA 2015 | Common Downregulated DEGs (MM27 & MM13) | Sorted by Adjusted P-value | Bold = shown in figure
Top 20 sig. → blue | Other sig. → grey | Bold = in figure (3) | Significant (adj.p<0.05): 8/54
Term	Overlap	Overlap (%)	P-value	Adjusted P-value	Odds Ratio	Combined Score	Genes
CDK1	9/494	1.82	1.53595e-05	0.000829416	7.0788	78.4602	TOP2A;TPX2;NFIB;MYB;CKAP2;MKI67;CENPA;DLGAP5;LMNB1
AURKA	3/36	8.33	0.000170792	0.00461139	31.7496	275.43	PLK1;CENPA;DLGAP5
CDK2	7/553	1.27	0.00129231	0.0179206	4.6913	31.2036	CCNA2;TPX2;CENPF;MYB;MKI67;DLGAP5;LMNB1
AURKB	3/77	3.9	0.0016036	0.0179206	14.1294	90.9301	CKAP2;MKI67;CENPA
CSNK2A1	5/286	1.75	0.00165931	0.0179206	6.3601	40.7131	TOP2A;RPS6KA5;MYB;HNRNPA1;MYH10
MAPK1	5/326	1.53	0.0029279	0.0263511	5.5562	32.412	TOP2A;TPX2;RPS6KA5;MYB;DLGAP5
PBK	1/2	50	0.00599107	0.0453668	337.949	1729.45	GPSM2
PRKCB	4/250	1.6	0.006721	0.0453668	5.7184	28.6062	TOP2A;KIT;KCTD12;LMNB1
PRKCZ	2/50	4	0.00988432	0.0593059	14.2902	65.9752	NREP;MYH10
MATK	1/5	20	0.0149116	0.0689179	84.4746	355.267	KIT
MKNK1	1/5	20	0.0149116	0.0689179	84.4746	355.267	HNRNPA1
RPS6KB2	1/6	16.67	0.0178676	0.0689179	67.5763	271.979	LMNB1
KIT	1/6	16.67	0.0178676	0.0689179	67.5763	271.979	KIT
STK10	1/6	16.67	0.0178676	0.0689179	67.5763	271.979	PLK1
GSK3B	5/527	0.95	0.0207518	0.0712604	3.3817	13.1047	TOP2A;TPX2;MYB;MKI67;LMNB1
PLK1	2/77	2.6	0.0224224	0.0712604	9.1333	34.6856	TOP2A;PLK1
MAPK3	3/202	1.49	0.0227966	0.0712604	5.2211	19.7418	TOP2A;RPS6KA5;MYB
PAK3	1/8	12.5	0.0237535	0.0712604	48.2639	180.508	PAK3
MAPK14	4/396	1.01	0.03097	0.0880199	3.562	12.3769	TPX2;RPS6KA5;MYB;MKI67
PRKG1	2/106	1.89	0.0403603	0.107656	6.5769	21.1113	KIT;PLK1
PRKCA	4/442	0.9	0.043546	0.107656	3.1804	9.9671	TOP2A;GPSM2;TPX2;KIT
PRKACB	2/111	1.8	0.0438598	0.107656	6.2736	19.6162	KIT;LMNB1
PLK3	1/18	5.56	0.0526664	0.122148	19.8634	58.4735	TOP2A
MAP3K8	1/19	5.26	0.0555109	0.122148	18.7589	54.2354	PLK1
CSNK1E	2/128	1.56	0.0565499	0.122148	5.4226	15.577	PER3;MYB
RPS6KA6	1/23	4.35	0.0668054	0.13875	15.3451	41.5235	RPS6KA5
RPS6KA5	1/25	4	0.0724027	0.144805	14.065	36.9277	RPS6KA5
PRKAA2	1/28	3.57	0.0807369	0.155707	12.5003	31.4578	HAS2
MAPK4	1/34	2.94	0.0971848	0.176709	10.2244	23.8346	MYB
CDK15	1/36	2.78	0.102603	0.176709	9.6392	21.9474	LMNB1
CDK18	1/37	2.7	0.1053	0.176709	9.371	21.0936	LMNB1
PRKCG	1/37	2.7	0.1053	0.176709	9.371	21.0936	TOP2A
CDK11A	1/38	2.63	0.107989	0.176709	9.1173	20.2925	LMNB1
PRKACA	3/393	0.76	0.113962	0.180998	2.6383	5.7302	HNRNPA1;GLI3;DACT1
CDK14	1/43	2.33	0.121316	0.187173	8.0299	16.9379	LMNB1
PRKCE	1/46	2.17	0.129217	0.191055	7.4934	15.3335	NREP
MAPKAPK2	1/47	2.13	0.131836	0.191055	7.3301	14.8523	PLK1
PAK1	1/48	2.08	0.134446	0.191055	7.1738	14.3949	PLK1
CSNK2A2	2/229	0.87	0.150499	0.208383	2.9945	5.671	TOP2A;MYB
SRC	2/259	0.77	0.182309	0.246118	2.6409	4.495	KIT;MTSS1
CSNK1D	1/72	1.39	0.194836	0.256614	4.7431	7.7579	MTSS1
LYN	1/82	1.22	0.218758	0.28126	4.1555	6.3154	KIT
IGF1R	1/86	1.16	0.22813	0.286488	3.9591	5.851	KIT
LCK	1/96	1.04	0.251078	0.308141	3.5406	4.8931	KIT
MAPK10	1/105	0.95	0.271157	0.325389	3.2327	4.2189	LMNB1
INSR	1/113	0.88	0.28856	0.336462	3.0006	3.7293	KIT
FYN	1/115	0.87	0.292847	0.336462	2.9477	3.62	KIT
MAPK9	1/131	0.76	0.326237	0.367016	2.5828	2.8931	LMNB1
CHEK1	1/137	0.73	0.338354	0.37288	2.4681	2.6746	MKI67
PRKACG	1/176	0.57	0.412056	0.443797	1.9143	1.6972	HNRNPA1
PRKDC	1/180	0.56	0.419142	0.443797	1.8711	1.627	KCTD12
AKT1	1/210	0.48	0.469678	0.487742	1.6001	1.2092	HNRNPA1
MAPK8	1/225	0.44	0.493299	0.502606	1.4918	1.0542	NFIB
RPS6KA3	1/332	0.3	0.634268	0.634268	1.0041	0.4571	TPX2

## Sheet: GO_BioProcess_DN
GO Biological Process 2025 | Common Downregulated DEGs (MM27 & MM13) | Sorted by Adjusted P-value | Bold = shown in figure
Top 20 sig. → blue | Other sig. → grey | Bold = in figure (2) | Significant (adj.p<0.05): 40/542
Term	Overlap	Overlap (%)	P-value	Adjusted P-value	Odds Ratio	Combined Score	Genes
Mitotic Cytokinesis (GO:0000281)	5/62	8.06	1.16338e-06	0.000630552	31.7113	433.309	PLK1;CKAP2;KIF20A;CENPA;MYH10
Cytoskeleton-Dependent Cytokinesis (GO:0061640)	5/84	5.95	5.27756e-06	0.00143022	22.855	277.735	PLK1;CKAP2;KIF20A;CENPA;MYH10
Nuclear Chromosome Segregation (GO:0098813)	3/18	16.67	2.02834e-05	0.00366453	69.9123	755.452	TOP2A;CENPF;FAM83D
Hyaluronan Biosynthetic Process (GO:0030213)	2/5	40	8.79885e-05	0.00997625	229.161	2139.97	HAS3;HAS2
Protein Localization to Chromatin (GO:0071168)	3/33	9.09	0.000131348	0.00997625	34.9298	312.191	RAD21;PLK1;CENPA
Establishment of Mitotic Spindle Orientation (GO:0000132)	3/31	9.68	0.000108675	0.00997625	37.4286	341.616	GPSM2;PLK1;CENPA
Regulation of Protein Localization to Cell Cortex (GO:1904776)	2/7	28.57	0.000184064	0.00997625	137.483	1182.38	GPSM2;PLK1
Polysaccharide Metabolic Process (GO:0005976)	2/7	28.57	0.000184064	0.00997625	137.483	1182.38	HAS3;HAS2
Mitotic Spindle Organization (GO:0007052)	4/90	4.44	0.00015422	0.00997625	16.49	144.735	GPSM2;TPX2;PLK1;DLGAP5
Establishment of Mitotic Spindle Localization (GO:0040001)	3/36	8.33	0.000170792	0.00997625	31.7496	275.43	GPSM2;PLK1;CENPA
Establishment of Spindle Orientation (GO:0051294)	3/40	7.5	0.000234328	0.0113951	28.3115	236.65	GPSM2;PLK1;CENPA
Regulation of Mitotic Spindle Organization (GO:0060236)	3/41	7.32	0.000252289	0.0113951	27.5651	228.375	GPSM2;TPX2;PLK1
Kinetochore Assembly (GO:0051382)	2/10	20	0.000392144	0.0151816	85.9138	673.898	CENPF;DLGAP5
Protein Localization to Nuclear Envelope (GO:0090435)	2/10	20	0.000392144	0.0151816	85.9138	673.898	PLK1;LMNB1
Kinetochore Organization (GO:0051383)	2/11	18.18	0.000478362	0.0152513	76.364	583.813	CENPF;DLGAP5
Polysaccharide Biosynthetic Process (GO:0000271)	2/11	18.18	0.000478362	0.0152513	76.364	583.813	HAS3;HAS2
Protein Localization to Chromosome (GO:0034502)	3/49	6.12	0.00042867	0.0152513	22.762	176.515	RAD21;PLK1;CENPA
Cellular Response to Fluid Shear Stress (GO:0071498)	2/12	16.67	0.000572927	0.0172515	68.7241	513.009	HAS2;MTSS1
Hyaluronan Metabolic Process (GO:0030212)	2/13	15.38	0.00067579	0.0192778	62.4734	456.032	HAS3;HAS2
Microtubule Cytoskeleton Organization Involved in Mitosis (GO:1902850)	3/59	5.08	0.000740457	0.0200664	18.688	134.707	GPSM2;PLK1;DLGAP5
Centromere Complex Assembly (GO:0034508)	2/15	13.33	0.000906213	0.0233889	52.8568	370.327	CENPF;DLGAP5
DNA Conformation Change (GO:0071103)	2/17	11.76	0.00116924	0.0284629	45.8046	309.245	TOP2A;HMGB3
Extracellular Matrix Assembly (GO:0085029)	2/18	11.11	0.00131286	0.0284629	42.9397	284.928	HAS3;HAS2
Establishment of Chromosome Localization (GO:0051303)	2/18	11.11	0.00131286	0.0284629	42.9397	284.928	CENPF;FAM83D
Detection of Mechanical Stimulus Involved in Sensory Perception (GO:0050974)	2/18	11.11	0.00131286	0.0284629	42.9397	284.928	KIT;KCNK2
Nuclear Migration (GO:0007097)	2/19	10.53	0.00146449	0.030529	40.4118	263.737	SYNE2;LMNB1
Regulation of Spindle Organization (GO:0090224)	2/20	10	0.00162408	0.0326018	38.1648	245.125	GPSM2;TPX2
Regulation of Cytokinesis (GO:0032465)	3/81	3.7	0.00185458	0.0358994	13.4022	84.3009	PLK1;KIF20A;E2F8
Negative Regulation of Microtubule Depolymerization (GO:0007026)	2/22	9.09	0.00196694	0.0367614	34.3448	214.012	TPX2;CKAP2
Negative Regulation of Protein Depolymerization (GO:1901880)	2/25	8	0.00253974	0.0444046	29.8606	178.438	TPX2;CKAP2
Glycosaminoglycan Biosynthetic Process (GO:0006024)	2/25	8	0.00253974	0.0444046	29.8606	178.438	HAS3;HAS2
Mitotic Spindle Checkpoint Signaling (GO:0071174)	2/27	7.41	0.00296008	0.0445656	27.469	159.939	CENPF;PLK1
Spindle Assembly Checkpoint Signaling (GO:0071173)	2/27	7.41	0.00296008	0.0445656	27.469	159.939	CENPF;PLK1
Mitotic Spindle Assembly Checkpoint Signaling (GO:0007094)	2/27	7.41	0.00296008	0.0445656	27.469	159.939	CENPF;PLK1
Myeloid Cell Development (GO:0061515)	2/26	7.69	0.0027461	0.0445656	28.6149	168.759	MYB;KIT
Negative Regulation of DNA-templated Transcription (GO:0045892)	9/1006	0.89	0.0029152	0.0445656	3.3529	19.5739	CENPF;RPS6KA5;PER3;NFIB;MYB;PLK1;GLI3;DACT1;E2F8
Regulation of Microtubule Depolymerization (GO:0031114)	2/28	7.14	0.00318165	0.0453803	26.4111	151.874	TPX2;CKAP2
Carbohydrate Biosynthetic Process (GO:0016051)	2/28	7.14	0.00318165	0.0453803	26.4111	151.874	HAS3;HAS2
Hemopoiesis (GO:0030097)	3/101	2.97	0.00347206	0.0470465	10.6563	60.3466	RTKN2;MYB;KIT
Negative Regulation of Mitotic Metaphase/Anaphase Transition (GO:0045841)	2/29	6.9	0.00341075	0.0470465	25.4317	144.473	CENPF;PLK1
Regulation of Spindle Assembly (GO:0090169)	2/31	6.45	0.0038914	0.0502176	23.6754	131.374	GPSM2;PLK1
Chromosome Condensation (GO:0030261)	2/31	6.45	0.0038914	0.0502176	23.6754	131.374	TOP2A;PLK1
Negative Regulation of Microtubule Polymerization or Depolymerization (GO:0031111)	2/34	5.88	0.00466778	0.0588357	21.4526	115.138	TPX2;CKAP2
Sister Chromatid Segregation (GO:0000819)	2/36	5.56	0.00522178	0.0643228	20.1886	106.09	TOP2A;PLK1
Positive Regulation of Cell Cycle Process (GO:0090068)	3/119	2.52	0.00549173	0.0661449	8.9946	46.8123	GPSM2;RAD21;E2F8
Mitotic Sister Chromatid Segregation (GO:0000070)	3/120	2.5	0.00562066	0.066226	8.9172	46.2029	TPX2;PLK1;DLGAP5
Negative Regulation of Transcription by RNA Polymerase II (GO:0000122)	7/732	0.96	0.00612879	0.0694947	3.5005	17.834	PER3;NFIB;MYB;PLK1;GLI3;DACT1;E2F8
Regulation of Mitotic Cell Cycle (GO:0007346)	3/124	2.42	0.00615451	0.0694947	8.6207	43.8843	PLK1;MKI67;DLGAP5
G2/M Transition of Mitotic Cell Cycle (GO:0000086)	2/40	5	0.00641558	0.0709641	18.0599	91.1849	CCNA2;PLK1
Positive Regulation of Cell Motility (GO:2000147)	4/249	1.61	0.0066281	0.0718486	5.742	28.8043	SEMA3D;KIT;HAS2;SYNE2
Digestive Tract Development (GO:0048565)	2/42	4.76	0.00705467	0.0741197	17.1552	84.9878	KIT;GLI3
DNA Recombination (GO:0006310)	2/43	4.65	0.00738462	0.0741197	16.7359	82.1458	RAD21;HMGB3
RNA Transport (GO:0050658)	2/43	4.65	0.00738462	0.0741197	16.7359	82.1458	PEG10;HNRNPA1
Cell Cycle G2/M Phase Transition (GO:0044839)	2/43	4.65	0.00738462	0.0741197	16.7359	82.1458	CCNA2;PLK1
T Cell Differentiation (GO:0030217)	2/46	4.35	0.00841552	0.0815054	15.5925	74.4958	KIT;GLI3
Membraneless Organelle Assembly (GO:0140694)	3/139	2.16	0.00842122	0.0815054	7.6641	36.6113	CENPF;CENPA;DLGAP5
Erythrocyte Differentiation (GO:0030218)	2/48	4.17	0.0091366	0.0853799	14.913	70.0237	MYB;KIT
Post-Translational Protein Modification (GO:0043687)	2/48	4.17	0.0091366	0.0853799	14.913	70.0237	CCNA2;RPS6KA5
Regulation of Cell Cycle Process (GO:0010564)	3/146	2.05	0.0096258	0.0884269	7.2863	33.8327	PLK1;KIF20A;MKI67
Regulation of Mitotic Metaphase/Anaphase Transition (GO:0030071)	2/51	3.92	0.0102681	0.0927549	13.9979	64.0924	PLK1;DLGAP5
Axon Guidance (GO:0007411)	3/152	1.97	0.0107344	0.0953779	6.9908	31.6985	RPS6KA5;SEMA3D;NFIB
Microtubule Bundle Formation (GO:0001578)	2/53	3.77	0.0110551	0.0966433	13.4476	60.5796	PLK1;KIF20A
Metaphase Chromosome Alignment (GO:0051310)	2/55	3.64	0.011868	0.100507	12.9388	57.3696	CENPF;FAM83D
Regulation of Alternative mRNA Splicing, via Spliceosome (GO:0000381)	2/55	3.64	0.011868	0.100507	12.9388	57.3696	CELF2;HNRNPA1
Monoatomic Anion Transmembrane Transport (GO:0098656)	2/72	2.78	0.0197746	0.100739	9.7882	38.4025	LRRC8C;KCNK2
Negative Regulation of Epithelial Cell Proliferation (GO:0050680)	2/73	2.74	0.0202929	0.100739	9.6498	37.6101	NFIB;MTSS1
Embryonic Organ Development (GO:0048568)	2/73	2.74	0.0202929	0.100739	9.6498	37.6101	KIT;GLI3
DNA Geometric Change (GO:0032392)	1/7	14.29	0.0208149	0.100739	56.3107	218.04	HMGB3
Negative Regulation of Hematopoietic Progenitor Cell Differentiation (GO:1901533)	1/7	14.29	0.0208149	0.100739	56.3107	218.04	MYB
Fatty Acid Elongation, Saturated Fatty Acid (GO:0019367)	1/7	14.29	0.0208149	0.100739	56.3107	218.04	ELOVL2
Galactosylceramide Metabolic Process (GO:0006681)	1/7	14.29	0.0208149	0.100739	56.3107	218.04	UGT8
Positive Regulation of Smooth Muscle Cell Differentiation (GO:0051152)	1/7	14.29	0.0208149	0.100739	56.3107	218.04	KIT
Nose Development (GO:0043584)	1/7	14.29	0.0208149	0.100739	56.3107	218.04	GLI3
Negative Regulation of Insulin-Like Growth Factor Receptor Signaling Pathway (GO:0043569)	1/5	20	0.0149116	0.100739	84.4746	355.267	IGFBP5
Epithelial Cell Differentiation Involved in Kidney Development (GO:0035850)	1/5	20	0.0149116	0.100739	84.4746	355.267	MTSS1
Erythropoietin-Mediated Signaling Pathway (GO:0038162)	1/5	20	0.0149116	0.100739	84.4746	355.267	KIT
Regulation of Circadian Sleep/Wake Cycle (GO:0042749)	1/5	20	0.0149116	0.100739	84.4746	355.267	PER3
Regulation of Circadian Sleep/Wake Cycle, Sleep (GO:0045187)	1/5	20	0.0149116	0.100739	84.4746	355.267	PER3
Regulation of Cell Migration (GO:0030334)	5/479	1.04	0.0143178	0.100739	3.7334	15.853	IGFBP5;SEMA3D;KIT;HAS2;SYNE2
Negative Regulation of Cytokinesis (GO:0032466)	1/5	20	0.0149116	0.100739	84.4746	355.267	E2F8
Renal System Development (GO:0072001)	2/59	3.39	0.01357	0.100739	12.0284	51.721	CENPF;HAS2
Myeloid Cell Differentiation (GO:0030099)	2/57	3.51	0.0127064	0.100739	12.4671	54.4269	MYB;KIT
Cellular Response to Interleukin-1 (GO:0071347)	2/57	3.51	0.0127064	0.100739	12.4671	54.4269	RPS6KA5;HAS2
Negative Regulation of Binding (GO:0051100)	2/66	3.03	0.016786	0.100739	10.7091	43.7702	NFIB;DACT1
Establishment of Mitotic Sister Chromatid Cohesion (GO:0034087)	1/6	16.67	0.0178676	0.100739	67.5763	271.979	RAD21
Fatty Acid Elongation, Monounsaturated Fatty Acid (GO:0034625)	1/6	16.67	0.0178676	0.100739	67.5763	271.979	ELOVL2
Fatty Acid Elongation, Polyunsaturated Fatty Acid (GO:0034626)	1/6	16.67	0.0178676	0.100739	67.5763	271.979	ELOVL2
Extracellular Matrix Organization (GO:0030198)	3/182	1.65	0.0173585	0.100739	5.8103	23.5533	HAS3;HAS2;HMCN1
Positive Regulation of DNA-binding Transcription Factor Activity (GO:0051091)	3/174	1.72	0.0154136	0.100739	6.0846	25.3882	RPS6KA5;RTKN2;KIT
Regulation of miRNA Transcription (GO:1902893)	2/66	3.03	0.016786	0.100739	10.7091	43.7702	NFIB;MYB
Galactolipid Biosynthetic Process (GO:0019375)	1/5	20	0.0149116	0.100739	84.4746	355.267	UGT8
Galactosylceramide Biosynthetic Process (GO:0006682)	1/5	20	0.0149116	0.100739	84.4746	355.267	UGT8
Nephron Tubule Development (GO:0072080)	1/5	20	0.0149116	0.100739	84.4746	355.267	MTSS1
Positive Regulation of Vascular Associated Smooth Muscle Cell Differentiation (GO:1905065)	1/5	20	0.0149116	0.100739	84.4746	355.267	KIT
Metaphase/Anaphase Transition of Mitotic Cell Cycle (GO:0007091)	1/5	20	0.0149116	0.100739	84.4746	355.267	PLK1
Nitrogen Compound Transport (GO:0071705)	3/172	1.74	0.0149478	0.100739	6.1573	25.8802	CENPF;LRRC8C;KCNK2
Glycosylceramide Biosynthetic Process (GO:0046476)	1/6	16.67	0.0178676	0.100739	67.5763	271.979	UGT8
Actin Filament-Based Transport (GO:0099515)	1/6	16.67	0.0178676	0.100739	67.5763	271.979	SYNE2
Adherens Junction Maintenance (GO:0034334)	1/6	16.67	0.0178676	0.100739	67.5763	271.979	MTSS1
Positive Regulation of Spindle Assembly (GO:1905832)	1/6	16.67	0.0178676	0.100739	67.5763	271.979	GPSM2
Metaphase/Anaphase Transition of Cell Cycle (GO:0044784)	1/6	16.67	0.0178676	0.100739	67.5763	271.979	PLK1
Regulation of Vascular Associated Smooth Muscle Cell Differentiation (GO:1905063)	1/6	16.67	0.0178676	0.100739	67.5763	271.979	KIT
Positive Regulation of Cell Migration (GO:0030335)	4/344	1.16	0.019718	0.100739	4.1176	16.1668	SEMA3D;KIT;HAS2;SYNE2
Fatty Acid Elongation, Unsaturated Fatty Acid (GO:0019368)	1/6	16.67	0.0178676	0.100739	67.5763	271.979	ELOVL2
Kidney Development (GO:0001822)	2/72	2.78	0.0197746	0.100739	9.7882	38.4025	CENPF;HAS2
Regulation of Striated Muscle Tissue Development (GO:0016202)	1/7	14.29	0.0208149	0.100739	56.3107	218.04	CENPF
Cellular Response to Erythropoietin (GO:0036018)	1/7	14.29	0.0208149	0.100739	56.3107	218.04	KIT
Mitotic Nuclear Membrane Disassembly (GO:0007077)	1/7	14.29	0.0208149	0.100739	56.3107	218.04	PLK1
cyclic-GMP-AMP Transmembrane Import Across Plasma Membrane (GO:0140361)	1/7	14.29	0.0208149	0.100739	56.3107	218.04	LRRC8C
Double-Strand Break Repair via Alternative Nonhomologous End Joining (GO:0097681)	1/7	14.29	0.0208149	0.100739	56.3107	218.04	PLK1
Positive Regulation of Dendritic Cell Cytokine Production (GO:0002732)	1/7	14.29	0.0208149	0.100739	56.3107	218.04	KIT
Positive Regulation of Cytoskeleton Organization (GO:0051495)	2/74	2.7	0.0208168	0.100739	9.5153	36.8433	GPSM2;MTSS1
Regulation of Sister Chromatid Cohesion (GO:0007063)	1/8	12.5	0.0237535	0.102178	48.2639	180.508	RAD21
Multi-Ciliated Epithelial Cell Differentiation (GO:1903251)	1/8	12.5	0.0237535	0.102178	48.2639	180.508	NFIB
Negative Regulation of Alpha-Beta T Cell Differentiation (GO:0046639)	1/8	12.5	0.0237535	0.102178	48.2639	180.508	GLI3
Sensory Organ Morphogenesis (GO:0090596)	1/8	12.5	0.0237535	0.102178	48.2639	180.508	GLI3
Regulation of Wnt Signaling Pathway, Planar Cell Polarity Pathway (GO:2000095)	1/8	12.5	0.0237535	0.102178	48.2639	180.508	DACT1
Regulation of Urine Volume (GO:0035809)	1/8	12.5	0.0237535	0.102178	48.2639	180.508	HAS2
Cellular Response to Platelet-Derived Growth Factor Stimulus (GO:0036120)	1/8	12.5	0.0237535	0.102178	48.2639	180.508	HAS2
Positive Regulation of Ubiquitin Protein Ligase Activity (GO:1904668)	1/8	12.5	0.0237535	0.102178	48.2639	180.508	PLK1
Positive Regulation of Vascular Associated Smooth Muscle Cell Migration (GO:1904754)	1/8	12.5	0.0237535	0.102178	48.2639	180.508	IGFBP5
Negative Regulation of Supramolecular Fiber Organization (GO:1902904)	2/76	2.63	0.0218816	0.102178	9.2572	35.3821	TPX2;CKAP2
Guanine Nucleotide Transmembrane Transport (GO:1903790)	1/8	12.5	0.0237535	0.102178	48.2639	180.508	LRRC8C
T Cell Apoptotic Process (GO:0070231)	1/8	12.5	0.0237535	0.102178	48.2639	180.508	GLI3
Protein Hexamerization (GO:0034214)	1/8	12.5	0.0237535	0.102178	48.2639	180.508	LRRC8C
Lipid Glycosylation (GO:0030259)	1/8	12.5	0.0237535	0.102178	48.2639	180.508	B3GALT1
Sphingolipid Biosynthetic Process (GO:0030148)	2/83	2.41	0.0257815	0.107129	8.4542	30.9264	UGT8;ELOVL2
Positive Regulation of RNA Biosynthetic Process (GO:1902680)	5/555	0.9	0.0252642	0.107129	3.205	11.789	TOP2A;NFIB;MYB;HAS3;GLI3
Axon Regeneration (GO:0031103)	1/9	11.11	0.0266834	0.107129	42.2288	153.025	NREP
Commissural Neuron Axon Guidance (GO:0071679)	1/9	11.11	0.0266834	0.107129	42.2288	153.025	NFIB
Response to Platelet-Derived Growth Factor (GO:0036119)	1/9	11.11	0.0266834	0.107129	42.2288	153.025	HAS2
Protein Localization to Microtubule Cytoskeleton (GO:0072698)	1/9	11.11	0.0266834	0.107129	42.2288	153.025	FAM83D
Alpha-Linolenic Acid Metabolic Process (GO:0036109)	1/9	11.11	0.0266834	0.107129	42.2288	153.025	ELOVL2
Neuron Projection Regeneration (GO:0031102)	1/9	11.11	0.0266834	0.107129	42.2288	153.025	NREP
DNA Topological Change (GO:0006265)	1/9	11.11	0.0266834	0.107129	42.2288	153.025	TOP2A
Regulation of Cell Division (GO:0051302)	2/85	2.35	0.026944	0.10738	8.2497	29.8143	PLK1;KIF20A
Mast Cell Activation Involved in Immune Response (GO:0002279)	1/10	10	0.0296046	0.109154	37.5348	132.116	KIT
Melanocyte Differentiation (GO:0030318)	1/10	10	0.0296046	0.109154	37.5348	132.116	KIT
Megakaryocyte Development (GO:0035855)	1/10	10	0.0296046	0.109154	37.5348	132.116	KIT
Mast Cell Degranulation (GO:0043303)	1/10	10	0.0296046	0.109154	37.5348	132.116	KIT
Detection of Mechanical Stimulus Involved in Sensory Perception of Sound (GO:0050910)	1/10	10	0.0296046	0.109154	37.5348	132.116	KIT
Negative Regulation of Cell Division (GO:0051782)	1/10	10	0.0296046	0.109154	37.5348	132.116	E2F8
Cyclic Nucleotide Transport (GO:0070729)	1/10	10	0.0296046	0.109154	37.5348	132.116	LRRC8C
Regulation of Mitotic Cell Cycle Phase Transition (GO:1901990)	2/88	2.27	0.0287269	0.109154	7.9607	28.2599	CENPF;PLK1
Positive Regulation of CREB Transcription Factor Activity (GO:0032793)	1/10	10	0.0296046	0.109154	37.5348	132.116	RPS6KA5
Nuclear Membrane Disassembly (GO:0051081)	1/10	10	0.0296046	0.109154	37.5348	132.116	PLK1
Basement Membrane Organization (GO:0071711)	1/10	10	0.0296046	0.109154	37.5348	132.116	HMCN1
Golgi Inheritance (GO:0048313)	1/11	9.09	0.0325172	0.112257	33.7797	115.729	PLK1
Positive Regulation of Cellular Component Biogenesis (GO:0044089)	2/93	2.15	0.0318004	0.112257	7.5214	25.9359	HAS3;MTSS1
Actin Crosslink Formation (GO:0051764)	1/11	9.09	0.0325172	0.112257	33.7797	115.729	GAS2L3
Positive Regulation of Metaphase/Anaphase Transition of Cell Cycle (GO:1902101)	1/11	9.09	0.0325172	0.112257	33.7797	115.729	DLGAP5
Aspartate Transmembrane Transport (GO:0015810)	1/11	9.09	0.0325172	0.112257	33.7797	115.729	LRRC8C
Regulation of Chromatin Organization (GO:1902275)	1/11	9.09	0.0325172	0.112257	33.7797	115.729	MKI67
Positive Regulation of DNA-templated DNA Replication (GO:2000105)	1/11	9.09	0.0325172	0.112257	33.7797	115.729	E2F8
Mast Cell Mediated Immunity (GO:0002448)	1/11	9.09	0.0325172	0.112257	33.7797	115.729	KIT
Negative Regulation of Alpha-Beta T Cell Activation (GO:0046636)	1/11	9.09	0.0325172	0.112257	33.7797	115.729	GLI3
Central Nervous System Projection Neuron Axonogenesis (GO:0021952)	1/11	9.09	0.0325172	0.112257	33.7797	115.729	NFIB
Regulation of mRNA Splicing, via Spliceosome (GO:0048024)	2/97	2.06	0.0343486	0.117829	7.2033	24.2836	CELF2;HNRNPA1
Epithelial Cell-Cell Adhesion (GO:0090136)	1/12	8.33	0.0354213	0.119244	30.7072	102.576	KIT
Very Long-Chain Fatty Acid Biosynthetic Process (GO:0042761)	1/12	8.33	0.0354213	0.119244	30.7072	102.576	ELOVL2
Reg of Single Stranded Viral RNA Replication via Double Stranded DNA Intermediate (GO:0045091)	1/12	8.33	0.0354213	0.119244	30.7072	102.576	TOP2A
Regulation of Vascular Associated Smooth Muscle Cell Migration (GO:1904752)	1/13	7.69	0.0383167	0.122163	28.1469	91.8115	IGFBP5
Positive Regulation of Mitotic Metaphase/Anaphase Transition (GO:0045842)	1/13	7.69	0.0383167	0.122163	28.1469	91.8115	DLGAP5
Neuronal Action Potential (GO:0019228)	1/13	7.69	0.0383167	0.122163	28.1469	91.8115	KCNK2
C4-dicarboxylate Transport (GO:0015740)	1/13	7.69	0.0383167	0.122163	28.1469	91.8115	LRRC8C
Fatty Acid Elongation (GO:0030497)	1/13	7.69	0.0383167	0.122163	28.1469	91.8115	ELOVL2
Cellular Response to Arsenic-Containing Substance (GO:0071243)	1/13	7.69	0.0383167	0.122163	28.1469	91.8115	HNRNPA1
Positive Regulation of Alpha-Beta T Cell Differentiation (GO:0046638)	1/13	7.69	0.0383167	0.122163	28.1469	91.8115	GLI3
Negative Regulation of T Cell Differentiation (GO:0045581)	1/13	7.69	0.0383167	0.122163	28.1469	91.8115	GLI3
Embryonic Hemopoiesis (GO:0035162)	1/13	7.69	0.0383167	0.122163	28.1469	91.8115	KIT
Regulation of RNA Splicing (GO:0043484)	2/104	1.92	0.0389919	0.123588	6.7066	21.7588	HNRNPA1;MBNL3
Positive Regulation of NF-kappaB Transcription Factor Activity (GO:0051092)	2/105	1.9	0.0396739	0.125019	6.6411	21.4313	RPS6KA5;RTKN2
T Cell Differentiation in Thymus (GO:0033077)	1/14	7.14	0.0412037	0.125463	25.9804	82.8576	GLI3
Acidic Amino Acid Transport (GO:0015800)	1/14	7.14	0.0412037	0.125463	25.9804	82.8576	KCNK2
Negative Regulation of Smooth Muscle Cell Migration (GO:0014912)	1/14	7.14	0.0412037	0.125463	25.9804	82.8576	IGFBP5
Cell-Cell Junction Maintenance (GO:0045217)	1/14	7.14	0.0412037	0.125463	25.9804	82.8576	MTSS1
Meiotic Sister Chromatid Cohesion (GO:0051177)	1/14	7.14	0.0412037	0.125463	25.9804	82.8576	RAD21
Resolution of Meiotic Recombination Intermediates (GO:0000712)	1/14	7.14	0.0412037	0.125463	25.9804	82.8576	TOP2A
Positive Regulation of Mitotic Sister Chromatid Separation (GO:1901970)	1/15	6.67	0.0440821	0.132003	24.1235	75.3063	DLGAP5
Digestive System Development (GO:0055123)	1/15	6.67	0.0440821	0.132003	24.1235	75.3063	KIT
Positive Regulation of Transmembrane Transport (GO:0034764)	1/15	6.67	0.0440821	0.132003	24.1235	75.3063	ARL6IP1
Mitotic Cell Cycle Phase Transition (GO:0044772)	2/113	1.77	0.0452904	0.134139	6.16	19.0631	CCNA2;PLK1
Regulation of Primary Metabolic Process (GO:0080090)	2/113	1.77	0.0452904	0.134139	6.16	19.0631	HNRNPA1;MBNL3
Negative Regulation of RNA Biosynthetic Process (GO:1902679)	4/470	0.85	0.0524268	0.135285	2.985	8.8007	CENPF;RPS6KA5;MYB;GLI3
Positive Regulation of Ubiquitin-Protein Transferase Activity (GO:0051443)	1/18	5.56	0.0526664	0.135285	19.8634	58.4735	PLK1
Linoleic Acid Metabolic Process (GO:0043651)	1/18	5.56	0.0526664	0.135285	19.8634	58.4735	ELOVL2
Protein Localization to Chromosome, Centromeric Region (GO:0071459)	1/18	5.56	0.0526664	0.135285	19.8634	58.4735	CENPA
Megakaryocyte Differentiation (GO:0030219)	1/18	5.56	0.0526664	0.135285	19.8634	58.4735	KIT
Response to Axon Injury (GO:0048678)	1/18	5.56	0.0526664	0.135285	19.8634	58.4735	NREP
Positive Regulation of Alpha-Beta T Cell Activation (GO:0046635)	1/18	5.56	0.0526664	0.135285	19.8634	58.4735	GLI3
Regulation of Activin Receptor Signaling Pathway (GO:0032925)	1/18	5.56	0.0526664	0.135285	19.8634	58.4735	DACT1
Embryonic Digit Morphogenesis (GO:0042733)	1/18	5.56	0.0526664	0.135285	19.8634	58.4735	GLI3
Negative Regulation of Signal Transduction (GO:0009968)	3/277	1.08	0.0504878	0.135285	3.7776	11.2799	IGFBP5;GLI3;DACT1
Regulation of Transforming Growth Factor Beta Receptor Signaling Pathway (GO:0017015)	2/120	1.67	0.0504309	0.135285	5.7925	17.3031	PEG10;NREP
Regulation of Ubiquitin-Protein Transferase Activity (GO:0051438)	1/17	5.88	0.0498134	0.135285	21.1059	63.3066	PLK1
Regulation of Ubiquitin Protein Ligase Activity (GO:1904666)	1/17	5.88	0.0498134	0.135285	21.1059	63.3066	PLK1
Apoptotic Nuclear Changes (GO:0030262)	1/16	6.25	0.046952	0.135285	22.5141	68.8624	TOP2A
Regulation of Non-Canonical Wnt Signaling Pathway (GO:2000050)	1/16	6.25	0.046952	0.135285	22.5141	68.8624	DACT1
+ Reg of Myeloid Leukocyte Cytokine Production Inv in Imm Resp (GO:0061081)	1/16	6.25	0.046952	0.135285	22.5141	68.8624	KIT
Immune Response-Regulating Cell Surface Receptor Signaling Pathway (GO:0002768)	1/17	5.88	0.0498134	0.135285	21.1059	63.3066	KIT
TORC1 Signaling (GO:0038202)	1/17	5.88	0.0498134	0.135285	21.1059	63.3066	RPS6KA5
Gliogenesis (GO:0042063)	1/17	5.88	0.0498134	0.135285	21.1059	63.3066	NFIB
Regulation of Hematopoietic Progenitor Cell Differentiation (GO:1901532)	1/17	5.88	0.0498134	0.135285	21.1059	63.3066	MYB
Epithelial Cell Migration (GO:0010631)	1/17	5.88	0.0498134	0.135285	21.1059	63.3066	KIT
Negative Regulation of Canonical Wnt Signaling Pathway (GO:0090090)	2/117	1.71	0.0482027	0.135285	5.9445	18.0258	GLI3;DACT1
Protein Complex Oligomerization (GO:0051259)	2/116	1.72	0.0474683	0.135285	5.997	18.2769	PEG10;LRRC8C
Mitotic Chromosome Condensation (GO:0007076)	1/16	6.25	0.046952	0.135285	22.5141	68.8624	PLK1
Cellular Component Assembly (GO:0022607)	3/277	1.08	0.0504878	0.135285	3.7776	11.2799	ARL6IP1;HAS3;HAS2
Long-Chain fatty-acyl-CoA Biosynthetic Process (GO:0035338)	1/17	5.88	0.0498134	0.135285	21.1059	63.3066	ELOVL2
Neural Tube Development (GO:0021915)	1/17	5.88	0.0498134	0.135285	21.1059	63.3066	DACT1
Positive Regulation of Smooth Muscle Cell Migration (GO:0014911)	1/17	5.88	0.0498134	0.135285	21.1059	63.3066	IGFBP5
Cardiac Epithelial to Mesenchymal Transition (GO:0060317)	1/19	5.26	0.0555109	0.13614	18.7589	54.2354	HAS2
Positive Regulation of Cell Cycle Phase Transition (GO:1901989)	1/19	5.26	0.0555109	0.13614	18.7589	54.2354	FAM83D
Mitotic Sister Chromatid Cohesion (GO:0007064)	1/19	5.26	0.0555109	0.13614	18.7589	54.2354	RAD21
Embryonic Digestive Tract Development (GO:0048566)	1/19	5.26	0.0555109	0.13614	18.7589	54.2354	GLI3
Regulation of Insulin-Like Growth Factor Receptor Signaling Pathway (GO:0043567)	1/19	5.26	0.0555109	0.13614	18.7589	54.2354	IGFBP5
Regulation of Megakaryocyte Differentiation (GO:0045652)	1/19	5.26	0.0555109	0.13614	18.7589	54.2354	MYB
Nuclear Envelope Organization (GO:0006998)	1/19	5.26	0.0555109	0.13614	18.7589	54.2354	LMNB1
Regulation of Nuclear Division (GO:0051783)	1/19	5.26	0.0555109	0.13614	18.7589	54.2354	MKI67
Regulation of Smooth Muscle Cell Migration (GO:0014910)	1/19	5.26	0.0555109	0.13614	18.7589	54.2354	IGFBP5
Limb Morphogenesis (GO:0035108)	1/19	5.26	0.0555109	0.13614	18.7589	54.2354	GLI3
Protein Localization to Nucleus (GO:0034504)	2/127	1.57	0.0557713	0.136162	5.4662	15.7782	PLK1;LMNB1
Regulation of Protein Catabolic Process (GO:0042176)	2/129	1.55	0.0573324	0.138702	5.3796	15.3796	FAM83D;DACT1
Cellular Response to Fatty Acid (GO:0071398)	1/20	5	0.0583471	0.138702	17.7707	50.4928	KCNK2
Regulation of Synaptic Transmission, GABAergic (GO:0032228)	1/20	5	0.0583471	0.138702	17.7707	50.4928	KCNK2
Regulation of Cellular Response to Transforming Growth Factor Beta Stimulus (GO:1903844)	1/20	5	0.0583471	0.138702	17.7707	50.4928	NREP
Regulation of Cell Cycle G2/M Phase Transition (GO:1902749)	1/20	5	0.0583471	0.138702	17.7707	50.4928	CENPF
Interleukin-1-Mediated Signaling Pathway (GO:0070498)	1/20	5	0.0583471	0.138702	17.7707	50.4928	RPS6KA5
Neuron Projection Guidance (GO:0097485)	2/132	1.52	0.0597025	0.141305	5.2546	14.8096	RPS6KA5;SEMA3D
Midbody Abscission (GO:0061952)	1/21	4.76	0.0611749	0.141696	16.8814	47.1668	KIF20A
Negative Regulation of Telomere Maintenance via Telomerase (GO:0032211)	1/21	4.76	0.0611749	0.141696	16.8814	47.1668	HNRNPA1
Peripheral Nervous System Development (GO:0007422)	1/21	4.76	0.0611749	0.141696	16.8814	47.1668	UGT8
Positive Regulation of Vascular Associated Smooth Muscle Cell Proliferation (GO:1904707)	1/21	4.76	0.0611749	0.141696	16.8814	47.1668	IGFBP5
Entrainment of Circadian Clock by Photoperiod (GO:0043153)	1/21	4.76	0.0611749	0.141696	16.8814	47.1668	PER3
DNA Metabolic Process (GO:0006259)	3/302	0.99	0.0621869	0.143427	3.4573	9.6031	TOP2A;RAD21;HMGB3
Positive Regulation of Telomere Maintenance via Telomerase (GO:0032212)	1/22	4.55	0.0639943	0.14452	16.0767	44.1942	HNRNPA1
Regulation of Mitotic Spindle Assembly (GO:1901673)	1/22	4.55	0.0639943	0.14452	16.0767	44.1942	PLK1
Photoperiodism (GO:0009648)	1/22	4.55	0.0639943	0.14452	16.0767	44.1942	PER3
Renal Absorption (GO:0070293)	1/22	4.55	0.0639943	0.14452	16.0767	44.1942	HAS2
Negative Regulation of Myeloid Cell Differentiation (GO:0045638)	1/22	4.55	0.0639943	0.14452	16.0767	44.1942	MYB
Negative Regulation of Smoothened Signaling Pathway (GO:0045879)	1/23	4.35	0.0668054	0.147189	15.3451	41.5235	GLI3
Placenta Development (GO:0001890)	1/23	4.35	0.0668054	0.147189	15.3451	41.5235	E2F8
Purine Ribonucleotide Transport (GO:0015868)	1/23	4.35	0.0668054	0.147189	15.3451	41.5235	LRRC8C
Long-Chain fatty-acyl-CoA Metabolic Process (GO:0035336)	1/23	4.35	0.0668054	0.147189	15.3451	41.5235	ELOVL2
T-helper Cell Differentiation (GO:0042093)	1/23	4.35	0.0668054	0.147189	15.3451	41.5235	MYB
Positive Regulation of Tyrosine Phosphorylation of STAT Protein (GO:0042531)	1/23	4.35	0.0668054	0.147189	15.3451	41.5235	KIT
Negative Regulation of DNA Binding (GO:0043392)	1/24	4.17	0.0696082	0.150309	14.6772	39.113	NFIB
Regulation of Transcription by RNA Polymerase II (GO:0006357)	11/2250	0.49	0.0692108	0.150309	1.7748	4.7397	RPS6KA5;PER3;NFIB;RAD21;ZNF704;MYB;PLK1;CKAP2;GLI3;DACT1;E2F8
Negative Regulation of Double-Strand Break Repair via Homologous Recombination (GO:2000042)	1/24	4.17	0.0696082	0.150309	14.6772	39.113	PLK1
Adenine Nucleotide Transport (GO:0051503)	1/24	4.17	0.0696082	0.150309	14.6772	39.113	LRRC8C
Mitotic Cytokinetic Process (GO:1902410)	1/24	4.17	0.0696082	0.150309	14.6772	39.113	KIF20A
Negative Regulation of Wnt Signaling Pathway (GO:0030178)	2/146	1.37	0.0711942	0.153124	4.7404	12.5258	GLI3;DACT1
Lamellipodium Assembly (GO:0030032)	1/25	4	0.0724027	0.15329	14.065	36.9277	KIT
Negative Regulation of miRNA Transcription (GO:1902894)	1/25	4	0.0724027	0.15329	14.065	36.9277	NFIB
Positive Regulation of Telomere Maintenance via Telomere Lengthening (GO:1904358)	1/25	4	0.0724027	0.15329	14.065	36.9277	HNRNPA1
Negative Chemotaxis (GO:0050919)	1/25	4	0.0724027	0.15329	14.065	36.9277	SEMA3D
Protein-Containing Complex Assembly (GO:0065003)	3/323	0.93	0.0729054	0.153754	3.227	8.4501	CENPF;CENPA;DLGAP5
Positive Regulation of Transcription by RNA Polymerase II (GO:0045944)	6/983	0.61	0.073512	0.154432	2.1566	5.6294	RPS6KA5;NFIB;MYB;CKAP2;GLI3;E2F8
Negative Regulation of DNA Biosynthetic Process (GO:2000279)	1/26	3.85	0.075189	0.154952	13.5017	34.939	HNRNPA1
Regulation of Actin Filament Bundle Assembly (GO:0032231)	1/26	3.85	0.075189	0.154952	13.5017	34.939	MTSS1
Limb Development (GO:0060173)	1/26	3.85	0.075189	0.154952	13.5017	34.939	GLI3
Microtubule Nucleation (GO:0007020)	1/26	3.85	0.075189	0.154952	13.5017	34.939	TPX2
fatty-acyl-CoA Biosynthetic Process (GO:0046949)	1/26	3.85	0.075189	0.154952	13.5017	34.939	ELOVL2
Dicarboxylic Acid Transport (GO:0006835)	1/27	3.7	0.077967	0.158865	12.9817	33.1225	KCNK2
Regulation of Protein Localization to Cell Periphery (GO:1904375)	1/27	3.7	0.077967	0.158865	12.9817	33.1225	PLK1
Negative Regulation of miRNA Metabolic Process (GO:2000629)	1/27	3.7	0.077967	0.158865	12.9817	33.1225	NFIB
Nuclear Membrane Organization (GO:0071763)	1/28	3.57	0.0807369	0.160291	12.5003	31.4578	PLK1
Regulation of Tyrosine Phosphorylation of STAT Protein (GO:0042509)	1/28	3.57	0.0807369	0.160291	12.5003	31.4578	KIT
Glial Cell Differentiation (GO:0010001)	1/28	3.57	0.0807369	0.160291	12.5003	31.4578	NFIB
Negative Regulation of Telomere Maintenance via Telomere Lengthening (GO:1904357)	1/28	3.57	0.0807369	0.160291	12.5003	31.4578	HNRNPA1
Hematopoietic Progenitor Cell Differentiation (GO:0002244)	1/28	3.57	0.0807369	0.160291	12.5003	31.4578	KIT
Positive Regulation of Viral Genome Replication (GO:0045070)	1/28	3.57	0.0807369	0.160291	12.5003	31.4578	TOP2A
Regulation of Transmembrane Receptor Protein Serine/Threonine Kinase Signaling Pathway (GO:0090092)	1/28	3.57	0.0807369	0.160291	12.5003	31.4578	NREP
mRNA Splice Site Recognition (GO:0006376)	1/29	3.45	0.0834985	0.165169	12.0533	29.9274	CELF2
Lamellipodium Organization (GO:0097581)	1/30	3.33	0.086252	0.166959	11.6371	28.5164	KIT
Very Long-Chain Fatty Acid Metabolic Process (GO:0000038)	1/30	3.33	0.086252	0.166959	11.6371	28.5164	ELOVL2
Mitotic G2 DNA Damage Checkpoint Signaling (GO:0007095)	1/30	3.33	0.086252	0.166959	11.6371	28.5164	PLK1
Positive Regulation of DNA-templated Transcription (GO:0045893)	7/1274	0.55	0.0858188	0.166959	1.9465	4.7797	RPS6KA5;NFIB;MYB;CKAP2;HAS3;GLI3;E2F8
Fc Receptor Signaling Pathway (GO:0038093)	1/30	3.33	0.086252	0.166959	11.6371	28.5164	KIT
Glycosphingolipid Biosynthetic Process (GO:0006688)	1/30	3.33	0.086252	0.166959	11.6371	28.5164	UGT8
Mesenchymal Cell Migration (GO:0090497)	1/31	3.23	0.0889974	0.17166	11.2486	27.212	SEMA3D
Negative Regulation of G1/S Transition of Mitotic Cell Cycle (GO:2000134)	1/32	3.12	0.0917346	0.174457	10.8852	26.0031	DACT1
Chondrocyte Differentiation (GO:0002062)	1/32	3.12	0.0917346	0.174457	10.8852	26.0031	NFIB
TOR Signaling (GO:0031929)	1/32	3.12	0.0917346	0.174457	10.8852	26.0031	RPS6KA5
Regulation of Metaphase/Anaphase Transition of Cell Cycle (GO:1902099)	1/32	3.12	0.0917346	0.174457	10.8852	26.0031	PLK1
Brain Development (GO:0007420)	2/170	1.18	0.0923765	0.175063	4.0583	9.6664	CENPF;NFIB
Negative Regulation of JNK Cascade (GO:0046329)	1/33	3.03	0.0944638	0.17716	10.5445	24.8801	DACT1
Vasculogenesis (GO:0001570)	1/33	3.03	0.0944638	0.17716	10.5445	24.8801	HAS2
Epithelial Tube Morphogenesis (GO:0060562)	1/33	3.03	0.0944638	0.17716	10.5445	24.8801	MTSS1
Membrane Organization (GO:0061024)	2/173	1.16	0.0951417	0.177817	3.9865	9.3778	KIF20A;LMNB1
Liver Development (GO:0001889)	1/34	2.94	0.0971848	0.180391	10.2244	23.8346	E2F8
Regulation of Cell Cycle Phase Transition (GO:1901987)	1/34	2.94	0.0971848	0.180391	10.2244	23.8346	PLK1
Cellular Response to cAMP (GO:0071320)	1/35	2.86	0.0998979	0.181086	9.9232	22.8592	IGFBP5
Adherens Junction Organization (GO:0034332)	1/35	2.86	0.0998979	0.181086	9.9232	22.8592	MTSS1
Neural Crest Cell Migration (GO:0001755)	1/35	2.86	0.0998979	0.181086	9.9232	22.8592	SEMA3D
Positive Regulation of Cytokine Production Involved in Immune Response (GO:0002720)	1/35	2.86	0.0998979	0.181086	9.9232	22.8592	KIT
Smoothened Signaling Pathway (GO:0007224)	1/35	2.86	0.0998979	0.181086	9.9232	22.8592	GLI3
Double-Strand Break Repair (GO:0006302)	2/176	1.14	0.0979308	0.181086	3.9172	9.1015	RAD21;PLK1
Positive Regulation of Mitotic Nuclear Division (GO:0045840)	1/35	2.86	0.0998979	0.181086	9.9232	22.8592	DLGAP5
Negative Regulation of Cell Cycle G1/S Phase Transition (GO:1902807)	1/36	2.78	0.102603	0.181735	9.6392	21.9474	DACT1
Regulation of Blood Circulation (GO:1903522)	1/36	2.78	0.102603	0.181735	9.6392	21.9474	CELF2
Negative Regulation of Double-Strand Break Repair (GO:2000780)	1/36	2.78	0.102603	0.181735	9.6392	21.9474	PLK1
Protein Phosphorylation (GO:0006468)	3/373	0.8	0.101453	0.181735	2.7838	6.3698	RPS6KA5;KIT;PLK1
Negative Regulation of Cell Cycle Process (GO:0010948)	1/36	2.78	0.102603	0.181735	9.6392	21.9474	E2F8
Embryonic Limb Morphogenesis (GO:0030326)	1/36	2.78	0.102603	0.181735	9.6392	21.9474	GLI3
Negative Regulation of Smooth Muscle Cell Proliferation (GO:0048662)	1/36	2.78	0.102603	0.181735	9.6392	21.9474	IGFBP5
Microtubule Polymerization (GO:0046785)	1/37	2.7	0.1053	0.185301	9.371	21.0936	TPX2
Regulation of G2/M Transition of Mitotic Cell Cycle (GO:0010389)	1/37	2.7	0.1053	0.185301	9.371	21.0936	CENPF
Regulation of Vascular Associated Smooth Muscle Cell Proliferation (GO:1904705)	1/38	2.63	0.107989	0.1882	9.1173	20.2925	IGFBP5
Positive Regulation of Protein Binding (GO:0032092)	1/38	2.63	0.107989	0.1882	9.1173	20.2925	DACT1
Positive Regulation of Receptor Signaling Pathway via JAK-STAT (GO:0046427)	1/38	2.63	0.107989	0.1882	9.1173	20.2925	KIT
Macromolecule Biosynthetic Process (GO:0009059)	2/189	1.06	0.110278	0.190423	3.6424	8.0307	HAS3;HAS2
Positive Regulation of Transferase Activity (GO:0051347)	1/39	2.56	0.11067	0.190423	8.8769	19.5398	PLK1
Semaphorin-Plexin Signaling Pathway (GO:0071526)	1/39	2.56	0.11067	0.190423	8.8769	19.5398	SEMA3D
Glycosphingolipid Metabolic Process (GO:0006687)	1/39	2.56	0.11067	0.190423	8.8769	19.5398	UGT8
Regulation of DNA Binding (GO:0051101)	1/40	2.5	0.113343	0.194405	8.6488	18.8314	NFIB
Positive Regulation of DNA Biosynthetic Process (GO:2000573)	1/41	2.44	0.116009	0.198349	8.4322	18.1637	HNRNPA1
Positive Regulation of Receptor Signaling Pathway via STAT (GO:1904894)	1/42	2.38	0.118666	0.199124	8.2261	17.5335	KIT
Negative Regulation of DNA Recombination (GO:0045910)	1/42	2.38	0.118666	0.199124	8.2261	17.5335	PLK1
Heterophilic Cell-Cell Adhesion via Plasma Membrane Cell Adhesion Molecules (GO:0007157)	1/42	2.38	0.118666	0.199124	8.2261	17.5335	HMCN1
Lysosome Localization (GO:0032418)	1/42	2.38	0.118666	0.199124	8.2261	17.5335	KIT
Protein Destabilization (GO:0031648)	1/42	2.38	0.118666	0.199124	8.2261	17.5335	PLK1
Response to cAMP (GO:0051591)	1/42	2.38	0.118666	0.199124	8.2261	17.5335	IGFBP5
Axonogenesis (GO:0007409)	2/200	1	0.121029	0.20108	3.4382	7.2605	RPS6KA5;SEMA3D
Neural Crest Cell Development (GO:0014032)	1/43	2.33	0.121316	0.20108	8.0299	16.9379	SEMA3D
Negative Regulation of Mitotic Cell Cycle Phase Transition (GO:1901991)	1/43	2.33	0.121316	0.20108	8.0299	16.9379	DACT1
Cellular Response to Glucose Starvation (GO:0042149)	1/43	2.33	0.121316	0.20108	8.0299	16.9379	HNRNPA1
Positive Regulation of Protein Metabolic Process (GO:0051247)	2/202	0.99	0.123012	0.20327	3.4034	7.1318	PLK1;DACT1
Regulation of Telomere Maintenance via Telomerase (GO:0032210)	1/44	2.27	0.123957	0.203591	7.8427	16.3742	HNRNPA1
Positive Regulation of Cell Cycle G1/S Phase Transition (GO:1902808)	1/44	2.27	0.123957	0.203591	7.8427	16.3742	FAM83D
Positive Regulation of miRNA Transcription (GO:1902895)	1/47	2.13	0.131836	0.209241	7.3301	14.8523	MYB
Development of Primary Male Sexual Characteristics (GO:0046546)	1/46	2.17	0.129217	0.209241	7.4934	15.3335	KIT
Male Gonad Development (GO:0008584)	1/46	2.17	0.129217	0.209241	7.4934	15.3335	KIT
Regulation of Intrinsic Apoptotic Signaling Pathway (GO:2001242)	1/46	2.17	0.129217	0.209241	7.4934	15.3335	RTKN2
Regulation of Signal Transduction (GO:0009966)	2/211	0.95	0.13203	0.209241	3.2554	6.5913	IGFBP5;KCTD12
Stem Cell Differentiation (GO:0048863)	1/47	2.13	0.131836	0.209241	7.3301	14.8523	KIT
Double-Strand Break Repair via Nonhomologous End Joining (GO:0006303)	1/47	2.13	0.131836	0.209241	7.3301	14.8523	PLK1
Positive Regulation of Chromosome Organization (GO:2001252)	1/47	2.13	0.131836	0.209241	7.3301	14.8523	RAD21
Chromosome Organization (GO:0051276)	1/47	2.13	0.131836	0.209241	7.3301	14.8523	TOP2A
Monoatomic Anion Transport (GO:0006820)	1/47	2.13	0.131836	0.209241	7.3301	14.8523	LRRC8C
Mitotic Spindle Assembly (GO:0090307)	1/47	2.13	0.131836	0.209241	7.3301	14.8523	TPX2
Mitotic Nuclear Division (GO:0140014)	1/47	2.13	0.131836	0.209241	7.3301	14.8523	PLK1
Mitotic G2/M Transition Checkpoint (GO:0044818)	1/48	2.08	0.134446	0.210607	7.1738	14.3949	PLK1
Membrane Lipid Biosynthetic Process (GO:0046467)	1/48	2.08	0.134446	0.210607	7.1738	14.3949	ELOVL2
Oligosaccharide Metabolic Process (GO:0009311)	1/48	2.08	0.134446	0.210607	7.1738	14.3949	B3GALT1
Positive Regulation of Leukocyte Cell-Cell Adhesion (GO:1903039)	1/48	2.08	0.134446	0.210607	7.1738	14.3949	HAS2
Positive Regulation of Smooth Muscle Cell Proliferation (GO:0048661)	1/49	2.04	0.137049	0.212926	7.024	13.9596	IGFBP5
Regulation of Canonical Wnt Signaling Pathway (GO:0060828)	2/216	0.93	0.137105	0.212926	3.1785	6.3158	GLI3;DACT1
Activation of Protein Kinase Activity (GO:0032147)	1/49	2.04	0.137049	0.212926	7.024	13.9596	TPX2
Nucleocytoplasmic Transport (GO:0006913)	1/50	2	0.139645	0.213806	6.8803	13.545	HNRNPA1
Positive Regulation of Non-Canonical NF-kappaB Signal Transduction (GO:1901224)	1/50	2	0.139645	0.213806	6.8803	13.545	RTKN2
Lipid Modification (GO:0030258)	1/50	2	0.139645	0.213806	6.8803	13.545	B3GALT1
Nuclear Export (GO:0051168)	1/50	2	0.139645	0.213806	6.8803	13.545	HNRNPA1
Negative Regulation of Protein Binding (GO:0032091)	1/50	2	0.139645	0.213806	6.8803	13.545	DACT1
Positive Regulation of Actin Filament Bundle Assembly (GO:0032233)	1/51	1.96	0.142232	0.215335	6.7424	13.1496	MTSS1
Carboxylic Acid Transmembrane Transport (GO:1905039)	1/51	1.96	0.142232	0.215335	6.7424	13.1496	LRRC8C
Blood Vessel Morphogenesis (GO:0048514)	1/51	1.96	0.142232	0.215335	6.7424	13.1496	HAS2
Epithelial to Mesenchymal Transition (GO:0001837)	1/51	1.96	0.142232	0.215335	6.7424	13.1496	FAM83D
Positive Regulation of Proteolysis (GO:0045862)	1/52	1.92	0.144812	0.21863	6.6098	12.7723	PLK1
Regulation of Smoothened Signaling Pathway (GO:0008589)	1/53	1.89	0.147384	0.219457	6.4824	12.4119	GLI3
B Cell Differentiation (GO:0030183)	1/53	1.89	0.147384	0.219457	6.4824	12.4119	KIT
Regulation of Proteolysis (GO:0030162)	1/53	1.89	0.147384	0.219457	6.4824	12.4119	PLK1
Positive Regulation of miRNA Metabolic Process (GO:2000630)	1/53	1.89	0.147384	0.219457	6.4824	12.4119	MYB
Unsaturated Fatty Acid Metabolic Process (GO:0033559)	1/53	1.89	0.147384	0.219457	6.4824	12.4119	ELOVL2
Regulation of Smooth Muscle Cell Proliferation (GO:0048660)	1/54	1.85	0.149949	0.222055	6.3598	12.0674	IGFBP5
Gonad Development (GO:0008406)	1/54	1.85	0.149949	0.222055	6.3598	12.0674	KIT
Glycolipid Biosynthetic Process (GO:0009247)	1/55	1.82	0.152506	0.224006	6.2417	11.7378	UGT8
Regulation of Receptor Signaling Pathway via JAK-STAT (GO:0046425)	1/55	1.82	0.152506	0.224006	6.2417	11.7378	KIT
Nucleus Organization (GO:0006997)	1/55	1.82	0.152506	0.224006	6.2417	11.7378	LMNB1
Regulation of Protein Localization to Nucleus (GO:1900180)	1/56	1.79	0.155055	0.226523	6.1279	11.4222	PLK1
Response to Peptide Hormone (GO:0043434)	1/56	1.79	0.155055	0.226523	6.1279	11.4222	IGFBP5
Positive Regulation of Protein Localization to Cell Periphery (GO:1904377)	1/57	1.75	0.157597	0.229002	6.0182	11.1198	GPSM2
Cartilage Development (GO:0051216)	1/57	1.75	0.157597	0.229002	6.0182	11.1198	NFIB
Mesenchymal Cell Differentiation (GO:0048762)	1/58	1.72	0.160132	0.230828	5.9123	10.8299	FAM83D
Sprouting Angiogenesis (GO:0002040)	1/58	1.72	0.160132	0.230828	5.9123	10.8299	E2F8
Regulation of Mitotic Nuclear Division (GO:0007088)	1/58	1.72	0.160132	0.230828	5.9123	10.8299	MKI67
mRNA Transport (GO:0051028)	1/59	1.69	0.162659	0.231394	5.8101	10.5516	PEG10
Mitotic DNA Damage Checkpoint Signaling (GO:0044773)	1/59	1.69	0.162659	0.231394	5.8101	10.5516	PLK1
Homophilic Cell Adhesion via Plasma Membrane Adhesion Molecules (GO:0007156)	1/59	1.69	0.162659	0.231394	5.8101	10.5516	HMCN1
Response to Interleukin-1 (GO:0070555)	1/59	1.69	0.162659	0.231394	5.8101	10.5516	HAS2
Negative Regulation of Protein-Containing Complex Assembly (GO:0031333)	1/59	1.69	0.162659	0.231394	5.8101	10.5516	DACT1
Regulation of RNA Biosynthetic Process (GO:2001141)	3/465	0.65	0.163325	0.231733	2.219	4.0208	RPS6KA5;MYB;GLI3
Negative Regulation of Multicellular Organismal Process (GO:0051241)	2/243	0.82	0.165204	0.233179	2.8186	5.075	RPS6KA5;NFIB
Negative Regulation of Intrinsic Apoptotic Signaling Pathway (GO:2001243)	1/60	1.67	0.165178	0.233179	5.7113	10.2845	RTKN2
Spliceosomal Complex Assembly (GO:0000245)	1/63	1.59	0.172692	0.242484	5.4341	9.5436	CELF2
Positive Regulation of Peptidyl-Tyrosine Phosphorylation (GO:0050731)	1/63	1.59	0.172692	0.242484	5.4341	9.5436	KIT
Positive Regulation of Binding (GO:0051099)	1/64	1.56	0.175182	0.243458	5.3476	9.3151	DACT1
Positive Regulation of T Cell Differentiation (GO:0045582)	1/64	1.56	0.175182	0.243458	5.3476	9.3151	GLI3
Positive Regulation of Mitotic Cell Cycle Phase Transition (GO:1901992)	1/64	1.56	0.175182	0.243458	5.3476	9.3151	DLGAP5
G1/S Transition of Mitotic Cell Cycle (GO:0000082)	1/64	1.56	0.175182	0.243458	5.3476	9.3151	CCNA2
Positive Regulation of Cell Population Proliferation (GO:0008284)	3/484	0.62	0.177307	0.244252	2.1292	3.6833	RTKN2;KIT;HAS2
Protein Targeting to Membrane (GO:0006612)	1/65	1.54	0.177664	0.244252	5.2638	9.0951	ARL6IP1
Positive Regulation of Organelle Assembly (GO:1902117)	1/65	1.54	0.177664	0.244252	5.2638	9.0951	GPSM2
Chloride Transmembrane Transport (GO:1902476)	1/65	1.54	0.177664	0.244252	5.2638	9.0951	KCNK2
Cytokine-Mediated Signaling Pathway (GO:0019221)	2/255	0.78	0.178007	0.244252	2.6832	4.6311	RPS6KA5;KIT
Cell Cycle G1/S Phase Transition (GO:0044843)	1/66	1.52	0.180139	0.246554	5.1825	8.883	CCNA2
Chordate Embryonic Development (GO:0043009)	1/67	1.49	0.182607	0.248676	5.1037	8.6785	DACT1
RNA Export From Nucleus (GO:0006405)	1/67	1.49	0.182607	0.248676	5.1037	8.6785	HNRNPA1
Regulation of MAPK Cascade (GO:0043408)	2/260	0.77	0.183388	0.249113	2.6306	4.4619	KIT;FAM83D
Ras Protein Signal Transduction (GO:0007265)	1/68	1.47	0.185067	0.250141	5.0273	8.4813	CCNA2
Action Potential (GO:0001508)	1/68	1.47	0.185067	0.250141	5.0273	8.4813	KCNK2
Regulation of DNA-templated Transcription (GO:0006355)	9/2139	0.42	0.187573	0.252897	1.4756	2.4695	CENPF;RPS6KA5;NFIB;RAD21;ZNF704;MYB;HAS3;GLI3;E2F8
Fatty Acid Biosynthetic Process (GO:0006633)	1/70	1.43	0.189966	0.254226	4.8811	8.1071	ELOVL2
Regulation of Heart Contraction (GO:0008016)	1/70	1.43	0.189966	0.254226	4.8811	8.1071	CELF2
Peptidyl-Serine Phosphorylation (GO:0018105)	1/70	1.43	0.189966	0.254226	4.8811	8.1071	PLK1
Positive Regulation of Proteasomal Ubiquitin-Dependent Protein Catabolic Process (GO:0032436)	1/71	1.41	0.192405	0.256856	4.8111	7.9295	PLK1
Regulation of G Protein-Coupled Receptor Signaling Pathway (GO:0008277)	1/72	1.39	0.194836	0.259463	4.7431	7.7579	KCTD12
Heterochromatin Formation (GO:0031507)	1/73	1.37	0.19726	0.260134	4.677	7.5919	LMNB1
Positive Regulation of Protein Transport (GO:0051222)	1/73	1.37	0.19726	0.260134	4.677	7.5919	MYH10
Regulation of DNA Replication (GO:0006275)	1/73	1.37	0.19726	0.260134	4.677	7.5919	CCNA2
Spindle Assembly (GO:0051225)	1/73	1.37	0.19726	0.260134	4.677	7.5919	TPX2
Positive Regulation of Secretion by Cell (GO:1903532)	1/75	1.33	0.202087	0.262037	4.5502	7.276	MYH10
Import Into Nucleus (GO:0051170)	1/75	1.33	0.202087	0.262037	4.5502	7.276	HNRNPA1
Peptidyl-Serine Modification (GO:0018209)	1/75	1.33	0.202087	0.262037	4.5502	7.276	PLK1
Positive Regulation of Protein Localization to Nucleus (GO:1900182)	1/75	1.33	0.202087	0.262037	4.5502	7.276	PLK1
Myeloid Leukocyte Differentiation (GO:0002573)	1/74	1.35	0.199677	0.262037	4.6127	7.4313	KIT
Negative Regulation of Apoptotic Signaling Pathway (GO:2001234)	1/74	1.35	0.199677	0.262037	4.6127	7.4313	RTKN2
Plasma Membrane Bounded Cell Projection Assembly (GO:0120031)	2/277	0.72	0.201856	0.262037	2.4658	3.9458	KIT;MTSS1
Positive Regulation of Protein Secretion (GO:0050714)	1/76	1.32	0.20449	0.262639	4.4893	7.1255	MYH10
Positive Regulation of Protein Ubiquitination (GO:0031398)	1/76	1.32	0.20449	0.262639	4.4893	7.1255	PLK1
Regulation of Neuron Differentiation (GO:0045664)	1/76	1.32	0.20449	0.262639	4.4893	7.1255	NREP
Lymphocyte Differentiation (GO:0030098)	1/76	1.32	0.20449	0.262639	4.4893	7.1255	KIT
Regulation of Non-Canonical NF-kappaB Signal Transduction (GO:1901222)	1/77	1.3	0.206886	0.265088	4.43	6.9798	RTKN2
Regulation of Protein Binding (GO:0043393)	1/78	1.28	0.209274	0.266886	4.3722	6.8386	DACT1
Cell Chemotaxis (GO:0060326)	1/78	1.28	0.209274	0.266886	4.3722	6.8386	KIT
Regulation of Cell Cycle G1/S Phase Transition (GO:1902806)	1/79	1.27	0.211656	0.268659	4.3159	6.7018	FAM83D
Sphingolipid Metabolic Process (GO:0006665)	1/79	1.27	0.211656	0.268659	4.3159	6.7018	ELOVL2
Regulation of TOR Signaling (GO:0032006)	1/80	1.25	0.21403	0.269152	4.2611	6.5691	FAM83D
Response to Tumor Necrosis Factor (GO:0034612)	1/80	1.25	0.21403	0.269152	4.2611	6.5691	HAS2
Central Nervous System Development (GO:0007417)	2/288	0.69	0.213923	0.269152	2.3697	3.6544	UGT8;NFIB
Regulation of Double-Strand Break Repair via Homologous Recombination (GO:0010569)	1/80	1.25	0.21403	0.269152	4.2611	6.5691	PLK1
Cellular Response to Cytokine Stimulus (GO:0071345)	2/289	0.69	0.215024	0.269775	2.3613	3.6293	KIT;HAS2
Regulation of Catabolic Process (GO:0009894)	1/81	1.23	0.216398	0.270872	4.2076	6.4404	FAM83D
Inorganic Anion Transmembrane Transport (GO:0098661)	1/82	1.22	0.218758	0.273195	4.1555	6.3154	KCNK2
Protein Modification Process (GO:0036211)	3/545	0.55	0.224225	0.27751	1.8837	2.8163	CCNA2;RPS6KA5;PLK1
Actomyosin Structure Organization (GO:0031032)	1/85	1.18	0.225797	0.27751	4.0065	5.9621	MYH10
Phosphorylation (GO:0016310)	2/298	0.67	0.224955	0.27751	2.2884	3.414	RPS6KA5;PLK1
Negative Regulation of Transforming Growth Factor Beta Receptor Signaling Pathway (GO:0030512)	1/85	1.18	0.225797	0.27751	4.0065	5.9621	PEG10
Cell Surface Receptor Protein Tyrosine Kinase Signaling Pathway (GO:0007169)	2/296	0.68	0.222745	0.27751	2.3042	3.4604	KIT;MTSS1
Carbohydrate Metabolic Process (GO:0005975)	1/85	1.18	0.225797	0.27751	4.0065	5.9621	HAS3
Long-Chain Fatty Acid Metabolic Process (GO:0001676)	1/85	1.18	0.225797	0.27751	4.0065	5.9621	ELOVL2
DNA Repair (GO:0006281)	2/302	0.66	0.229382	0.281278	2.2575	3.3238	RAD21;PLK1
Cellular Response to Tumor Necrosis Factor (GO:0071356)	1/87	1.15	0.230455	0.281957	3.9129	5.7429	HAS2
Positive Regulation of Protein Kinase Activity (GO:0045860)	1/88	1.14	0.232774	0.283513	3.8677	5.6379	TPX2
Positive Regulation of Ubiquitin-Dependent Protein Catabolic Process (GO:2000060)	1/88	1.14	0.232774	0.283513	3.8677	5.6379	PLK1
Positive Regulation of Canonical Wnt Signaling Pathway (GO:0090263)	1/89	1.12	0.235086	0.285687	3.8236	5.5358	DACT1
Protein Transport (GO:0015031)	2/308	0.65	0.236033	0.286197	2.2125	3.1944	NEURL1B;CENPF
Establishment of Protein Localization to Organelle (GO:0072594)	1/90	1.11	0.237391	0.286561	3.7804	5.4364	NEURL1B
Chloride Transport (GO:0006821)	1/90	1.11	0.237391	0.286561	3.7804	5.4364	KCNK2
Protein O-linked Glycosylation (GO:0006493)	1/91	1.1	0.239689	0.288052	3.7382	5.3397	B3GALT1
Calcium-Mediated Signaling (GO:0019722)	1/91	1.1	0.239689	0.288052	3.7382	5.3397	RCAN2
Regulation of Epithelial Cell Proliferation (GO:0050678)	1/93	1.08	0.244265	0.292255	3.6566	5.154	MTSS1
Regulation of Protein Metabolic Process (GO:0051246)	1/93	1.08	0.244265	0.292255	3.6566	5.154	FAM83D
Lipid Biosynthetic Process (GO:0008610)	1/94	1.06	0.246543	0.294331	3.6171	5.0647	B3GALT1
Regulation of Cell Cycle (GO:0051726)	2/318	0.63	0.247145	0.294401	2.1414	2.9932	PLK1;DLGAP5
Regulation of Gene Expression (GO:0010468)	5/1127	0.44	0.248669	0.295567	1.5247	2.1218	RPS6KA5;MYB;HNRNPA1;MBNL3;GLI3
Sensory Perception of Sound (GO:0007605)	1/96	1.04	0.251078	0.297127	3.5406	4.8931	KIT
B Cell Activation (GO:0042113)	1/96	1.04	0.251078	0.297127	3.5406	4.8931	KIT
Regulation of Organelle Organization (GO:0033043)	1/97	1.03	0.253336	0.299146	3.5035	4.8105	ARL6IP1
Positive Regulation of Proteasomal Protein Catabolic Process (GO:1901800)	1/98	1.02	0.255587	0.300494	3.4672	4.73	PLK1
Positive Regulation of Supramolecular Fiber Organization (GO:1902905)	1/98	1.02	0.255587	0.300494	3.4672	4.73	MTSS1
Regulation of Protein Secretion (GO:0050708)	1/99	1.01	0.257831	0.301824	3.4317	4.6515	MYH10
Positive Regulation of Protein Catabolic Process (GO:0045732)	1/99	1.01	0.257831	0.301824	3.4317	4.6515	DACT1
Positive Regulation of Protein Localization (GO:1903829)	1/102	0.98	0.264524	0.308326	3.3292	4.4273	PLK1
Negative Regulation of Translation (GO:0017148)	1/102	0.98	0.264524	0.308326	3.3292	4.4273	IGFBP5
Organic Anion Transport (GO:0015711)	1/105	0.95	0.271157	0.31538	3.2327	4.2189	LRRC8C
Axon Development (GO:0061564)	1/107	0.93	0.275547	0.319799	3.1714	4.0879	NREP
Regulation of Proteasomal Ubiquitin-Dependent Protein Catabolic Process (GO:0032434)	1/109	0.92	0.27991	0.32417	3.1124	3.9629	PLK1
Negative Regulation of Gene Expression, Epigenetic (GO:0045814)	1/110	0.91	0.282082	0.325989	3.0837	3.9025	LMNB1
Regulation of G1/S Transition of Mitotic Cell Cycle (GO:2000045)	1/111	0.9	0.284248	0.326404	3.0555	3.8435	DACT1
Negative Regulation of Developmental Process (GO:0051093)	1/111	0.9	0.284248	0.326404	3.0555	3.8435	NFIB
Positive Regulation of Cellular Component Organization (GO:0051130)	1/111	0.9	0.284248	0.326404	3.0555	3.8435	HAS3
Regulation of Wnt Signaling Pathway (GO:0030111)	1/112	0.89	0.286407	0.327535	3.0278	3.7858	DACT1
Positive Regulation of Cellular Process (GO:0048522)	3/622	0.48	0.286442	0.327535	1.6428	2.0539	RTKN2;KIT;HAS2
Double-Strand Break Repair via Homologous Recombination (GO:0000724)	1/114	0.88	0.290707	0.330321	2.9739	3.6741	RAD21
T Cell Activation (GO:0042110)	1/114	0.88	0.290707	0.330321	2.9739	3.6741	KIT
Positive Regulation of Wnt Signaling Pathway (GO:0030177)	1/114	0.88	0.290707	0.330321	2.9739	3.6741	DACT1
Regulation of JNK Cascade (GO:0046328)	1/115	0.87	0.292847	0.332056	2.9477	3.62	DACT1
Regulation of DNA Metabolic Process (GO:0051052)	1/116	0.86	0.29498	0.333777	2.9219	3.5672	CCNA2
Modulation of Chemical Synaptic Transmission (GO:0050804)	1/117	0.85	0.297108	0.335484	2.8966	3.5154	KCNK2
Negative Regulation of Gene Expression (GO:0010629)	2/364	0.55	0.298382	0.336223	1.8649	2.2554	RPS6KA5;IGFBP5
Enzyme-Linked Receptor Protein Signaling Pathway (GO:0007167)	1/121	0.83	0.305554	0.34359	2.7994	3.3191	MTSS1
- Reg of Transmembrane Receptor Prot Serine/Threonine Kinase Sgnlng Pway (GO:0090101)	1/122	0.82	0.30765	0.345231	2.7762	3.2725	PEG10
Negative Regulation of Cell Population Proliferation (GO:0008285)	2/379	0.53	0.315028	0.352779	1.7894	2.0669	IGFBP5;MTSS1
Potassium Ion Transport (GO:0006813)	1/127	0.79	0.318038	0.354302	2.6653	3.0534	KCNK2
Negative Regulation of Programmed Cell Death (GO:0043069)	2/382	0.52	0.318349	0.354302	1.775	2.0316	ARL6IP1;PLK1
Negative Regulation of MAPK Cascade (GO:0043409)	1/127	0.79	0.318038	0.354302	2.6653	3.0534	DACT1
Golgi Organization (GO:0007030)	1/128	0.78	0.320097	0.35479	2.6442	3.0121	PLK1
RNA Biosynthetic Process (GO:0032774)	1/128	0.78	0.320097	0.35479	2.6442	3.0121	CELF2
Epithelial Cell Differentiation (GO:0030855)	1/132	0.76	0.328271	0.363108	2.5629	2.8549	E2F8
Potassium Ion Transmembrane Transport (GO:0071805)	1/134	0.75	0.332323	0.366841	2.5241	2.7807	KCNK2
protein-RNA Complex Assembly (GO:0022618)	1/138	0.72	0.340353	0.374942	2.45	2.6405	CELF2
Negative Regulation of Cell Motility (GO:2000146)	1/139	0.72	0.342346	0.376372	2.4321	2.607	IGFBP5
Protein Autophosphorylation (GO:0046777)	1/140	0.71	0.344332	0.37779	2.4145	2.5742	KIT
Cellular Response to Starvation (GO:0009267)	1/141	0.71	0.346313	0.379195	2.3971	2.5419	HNRNPA1
Protein Homooligomerization (GO:0051260)	1/143	0.7	0.350257	0.382741	2.3631	2.4791	PEG10
Protein Glycosylation (GO:0006486)	1/145	0.69	0.354178	0.385471	2.33	2.4185	B3GALT1
Regulation of Apoptotic Process (GO:0042981)	3/704	0.43	0.354158	0.385471	1.4445	1.4994	TOP2A;ARL6IP1;PLK1
Negative Regulation of Protein Metabolic Process (GO:0051248)	1/146	0.68	0.35613	0.386818	2.3139	2.389	IGFBP5
Cellular Response to Growth Factor Stimulus (GO:0071363)	1/150	0.67	0.363878	0.394444	2.2513	2.2759	HAS2
Actin Filament Organization (GO:0007015)	1/158	0.63	0.379101	0.410126	2.1357	2.0715	GAS2L3
Regulation of Cellular Component Organization (GO:0051128)	1/159	0.63	0.380979	0.410518	2.1221	2.0478	MKI67
Epithelium Development (GO:0060429)	1/159	0.63	0.380979	0.410518	2.1221	2.0478	DACT1
+ Reg of Phosphatidylinositol 3-Kinase/Prot Kinase B Signal Transduction (GO:0051897)	1/162	0.62	0.386578	0.415725	2.0822	1.979	KIT
Cellular Response to Nitrogen Compound (GO:1901699)	1/169	0.59	0.39945	0.428716	1.9948	1.8305	IGFBP5
RNA Splicing, via Transesterification Reactions With Bulged Adenosine as Nucleophile (GO:0000377)	1/171	0.58	0.403078	0.430904	1.9711	1.791	HNRNPA1
Cell-Cell Adhesion via Plasma-Membrane Adhesion Molecules (GO:0098742)	1/171	0.58	0.403078	0.430904	1.9711	1.791	HMCN1
Regulation of Cytokine Production (GO:0001817)	1/172	0.58	0.404885	0.431983	1.9595	1.7717	RPS6KA5
Regulation of Cell Population Proliferation (GO:0042127)	3/769	0.39	0.407504	0.433924	1.3174	1.1827	RTKN2;KIT;HAS2
Negative Regulation of Apoptotic Process (GO:0043066)	2/475	0.42	0.418723	0.444996	1.4192	1.2355	ARL6IP1;PLK1
Positive Regulation of Catabolic Process (GO:0009896)	1/183	0.55	0.424402	0.449269	1.84	1.577	DACT1
Nervous System Development (GO:0007399)	2/480	0.42	0.423932	0.449269	1.404	1.2049	UGT8;DACT1
Negative Regulation of Cell Migration (GO:0030336)	1/184	0.54	0.426144	0.450234	1.8299	1.5608	IGFBP5
Small GTPase-mediated Signal Transduction (GO:0007264)	1/188	0.53	0.433063	0.456654	1.7904	1.4983	CCNA2
Negative Regulation of Cytokine Production (GO:0001818)	1/191	0.52	0.438199	0.461173	1.7618	1.4536	RPS6KA5
Endomembrane System Organization (GO:0010256)	1/196	0.51	0.446657	0.469163	1.7162	1.3832	LMNB1
Regulation of Cell Differentiation (GO:0045595)	1/201	0.5	0.454989	0.47607	1.6729	1.3174	NREP
Regulation of Translation (GO:0006417)	1/201	0.5	0.454989	0.47607	1.6729	1.3174	IGFBP5
mRNA Splicing, via Spliceosome (GO:0000398)	1/211	0.47	0.471286	0.492171	1.5924	1.198	HNRNPA1
Protein Stabilization (GO:0050821)	1/212	0.47	0.472889	0.492896	1.5848	1.1868	PER3
Regulation of Phosphatidylinositol 3-Kinase/Protein Kinase B Signal Transduction (GO:0051896)	1/219	0.46	0.483977	0.503485	1.5334	1.1128	KIT
Negative Regulation of Cell Differentiation (GO:0045596)	1/220	0.45	0.485542	0.504145	1.5263	1.1027	MYB
Regulation of ERK1 and ERK2 Cascade (GO:0070372)	1/223	0.45	0.49021	0.508019	1.5054	1.0732	FAM83D
mRNA Processing (GO:0006397)	1/226	0.44	0.494836	0.511834	1.4851	1.0448	HNRNPA1
Positive Regulation of Programmed Cell Death (GO:0043068)	1/248	0.4	0.527522	0.544603	1.3513	0.8643	TOP2A
Positive Regulation of Signal Transduction (GO:0009967)	1/256	0.39	0.538884	0.555276	1.3084	0.8089	DACT1
Inflammatory Response (GO:0006954)	1/261	0.38	0.545849	0.561385	1.2829	0.7767	KIT
RNA Processing (GO:0006396)	1/291	0.34	0.585516	0.601041	1.1485	0.6147	CELF2
Positive Regulation of Intracellular Signal Transduction (GO:1902533)	2/652	0.31	0.586726	0.601144	1.0233	0.5456	RTKN2;KIT
Negative Regulation of Intracellular Signal Transduction (GO:1902532)	1/297	0.34	0.59303	0.606457	1.1248	0.5877	RTKN2
Regulation of Intracellular Signal Transduction (GO:1902531)	1/302	0.33	0.59919	0.611602	1.1059	0.5664	FAM83D
Monoatomic Cation Transmembrane Transport (GO:0098655)	1/304	0.33	0.601628	0.612937	1.0985	0.5581	KCNK2
Inorganic Cation Transmembrane Transport (GO:0098662)	1/307	0.33	0.605258	0.615478	1.0875	0.546	KCNK2
Positive Regulation of Apoptotic Process (GO:0043065)	1/313	0.32	0.61242	0.621595	1.0663	0.5228	TOP2A
Protein Modification by Small Protein Conjugation (GO:0032446)	1/316	0.32	0.615953	0.624012	1.056	0.5117	PLK1
Chromatin Organization (GO:0006325)	1/323	0.31	0.624074	0.63106	1.0326	0.4869	TOP2A
Intracellular Signaling Cassette (GO:0141124)	1/354	0.28	0.658055	0.664183	0.9405	0.3936	RCAN2
Positive Regulation of MAPK Cascade (GO:0043410)	1/362	0.28	0.666323	0.671277	0.9192	0.3732	KIT
Protein Ubiquitination (GO:0016567)	1/369	0.27	0.673395	0.677143	0.9014	0.3564	PLK1
Gene Expression (GO:0010467)	1/381	0.26	0.685178	0.687715	0.8724	0.3298	CELF2
Cellular Response to Oxygen-Containing Compound (GO:1901701)	1/384	0.26	0.688057	0.689329	0.8655	0.3236	IGFBP5
DNA Damage Response (GO:0006974)	1/421	0.24	0.721514	0.721514	0.7877	0.2571	TOP2A

[truncated: 1 more sheets: ARCHS4_Kinases_DN]
