# Supplementary material
Source: Research Square preprint supplement (doi:10.21203/rs.3.rs-9577216/v1)
Supplement: Supplementary file 11 [file bbe1920d113b8a1840596c22.xlsx]

## Sheet: INDEX
Supplementary Table 7. MM27 - EnrichR Analysis + DEG Lists (Vol+Aur vs DMSO)
Sheet	Database	Direction	Total pathways	Significant (adj.p<0.05)	In figure
DEG_up1	DEG list	Upregulated	2145
DEG_dn1	DEG list	Downregulated	629
WikiPathways_UP	WikiPathways 2024 Human	Upregulated	753	50	3
Reactome_UP	Reactome Pathways 2024	Upregulated	1737	119	3
Panther_UP	PANTHER 2016	Upregulated	98	6	0
MSigDB_Hallmark_UP	MSigDB Hallmark 2020	Upregulated	49	19	2
KEGG_UP	KEGG 2026	Upregulated	340	19	0
GO_BioProcess_UP	GO Biological Process 2025	Upregulated	4168	7	5
BioPlanet_UP	BioPlanet 2019	Upregulated	1303	28	0
ARCHS4_Kinases_UP	ARCHS4 Kinases	Upregulated	494	163	0
ARCHS4_Kinases_DN	ARCHS4 Kinases	Downregulated	464	68	4
BioPlanet_DN	BioPlanet 2019	Downregulated	821	0	0
Elsevier_DN	Elsevier Pathway Collection	Downregulated	986	3	2
GO_BioProcess_DN	GO Biological Process 2025	Downregulated	2451	0	5
GO_CellComp_DN	GO Cellular Component 2025	Downregulated	208	4	1
GO_MolFunc_DN	GO Molecular Function 2025	Downregulated	446	0	0
KEA_DN	KEA 2015	Downregulated	113	2	0
MGI_Phenotype_DN	MGI Mammalian Phenotype	Downregulated	2915	9	0
MSigDB_Hallmark_DN	MSigDB Hallmark 2020	Downregulated	47	5	3
NCI_Nature_DN	NCI-Nature 2016	Downregulated	147	0	0
Reactome_DN	Reactome Pathways 2024	Downregulated	1047	0	0
WikiPathways_DN	WikiPathways 2024 Human	Downregulated	471	8	1

## Sheet: DEG_up1
MM27 Upregulated DEGs Vol. + Aur. vs DMSO| log2FC > 1
Total genes: 2145 | Sorted by adjusted P-value
Gene	Base Mean	log2 Fold Change	lfcSE	P-value	Adjusted P-value
HMOX1	25266.6	7.5087	0.2029	5.32665e-301	7.85894e-297
GCLM	11216	2.6476	0.0795	2.11964e-244	1.56366e-240
SRXN1	12980.3	2.5333	0.0951	1.76461e-157	8.67837e-154
SLC7A11	12247	2.5	0.0986	1.0602e-142	3.91055e-139
CYP4F11	430.069	6.4428	0.2862	3.05226e-112	9.00662e-109
CLU	308.795	5.3555	0.2441	2.27781e-107	5.60115e-104
GSR	14192.8	1.3465	0.0677	2.97998e-88	6.28094e-85
SLCO2B1	351.803	6.3041	0.3222	6.46217e-86	1.05936e-82
TUBA4A	246.856	4.1217	0.2135	6.42767e-84	9.48338e-81
CXCR4	824.998	3.0981	0.1621	1.3554e-82	1.81796e-79
TXNRD1	71163.5	1.2375	0.0653	1.52053e-80	1.86949e-77
SERPINE1	287.583	3.4336	0.1903	8.04374e-74	8.47695e-71
AKR1B10	617.086	5.8688	0.3294	2.51411e-72	2.47287e-69
FECH	2813.15	1.0825	0.0616	1.11153e-69	9.64674e-67
SRPX2	949.324	3.2342	0.1855	2.89203e-69	2.3705e-66
HSPB8	887.862	1.6231	0.0947	9.78144e-67	7.21577e-64
LUCAT1	272.187	4.0578	0.238	2.16767e-66	1.52294e-63
NDRG4	817.18	1.872	0.1116	3.91885e-64	2.51386e-61
PRECSIT	785.655	2.0979	0.1252	4.33489e-64	2.66488e-61
KCNE4	511.231	1.8024	0.1093	4.47533e-62	2.53958e-59
TRIM16	3911.39	2.3889	0.1465	6.72371e-61	3.67413e-58
B4GALNT1	795.571	2.0324	0.1253	3.56655e-60	1.82605e-57
TENT5B	261.321	2.2936	0.1414	3.58923e-60	1.82605e-57
NMRAL2P	295.492	2.0966	0.1298	1.05719e-59	5.19928e-57
DGCR8	1768.85	1.9902	0.1242	8.59074e-59	3.96087e-56
GLA	4598.3	1.998	0.1259	1.18308e-57	5.13385e-55
PRNP	24032.1	1.278	0.0812	1.38249e-56	5.6659e-54
APOL2	452.58	2.1515	0.1419	5.2307e-53	1.71497e-50
KYNU	822.883	1.734	0.115	2.68548e-52	8.61337e-50
ABCB6	2996.79	2.0739	0.1378	3.60708e-52	1.13232e-49
TRIM16L	3714.01	2.445	0.1632	1.01223e-51	3.11133e-49
SPP1	4292.74	1.5704	0.1061	2.14599e-50	6.20821e-48
RHOB	2338.51	1.2243	0.0831	7.54853e-50	2.10134e-47
GCNT3	172.903	3.0487	0.2087	2.66632e-49	7.28498e-47
SLC45A3	497.141	1.9832	0.1374	3.40834e-48	9.14304e-46
CXCL8	7085.53	3.2936	0.2308	1.7938e-47	4.72602e-45
SCN2A	132.868	5.0772	0.357	3.04495e-46	7.61445e-44
MLLT11	5355.86	1.4138	0.0999	3.02654e-46	7.61445e-44
UNKL	544.908	2.3927	0.172	4.24467e-45	1.04376e-42
CD53	103.475	4.0656	0.293	1.64517e-44	3.91498e-42
SLC2A1	1102.76	1.8485	0.1342	4.23285e-44	9.91292e-42
F2RL2	151.817	4.9444	0.3651	1.95354e-42	4.36704e-40
CTSL	13623	1.6689	0.1242	4.57258e-42	9.77737e-40
ACOT13	2417.28	1.2726	0.095	1.28221e-41	2.70254e-39
BLVRB	1837.72	3.0183	0.2299	1.51444e-40	3.10333e-38
SYNJ2	419.921	2.038	0.1551	2.22713e-40	4.50124e-38
GRAMD1B	890.104	2.2655	0.174	8.43682e-40	1.65969e-37
HTATIP2	2477.98	1.3025	0.1001	1.8291e-39	3.55087e-37
SLC12A8	96.067	3.3177	0.2561	3.43624e-39	6.5842e-37
PGD	8270.68	1.7931	0.1405	2.85327e-38	5.32875e-36
SQSTM1	12488.1	2.5866	0.2035	3.0893e-38	5.69745e-36
MSC	199.834	2.9422	0.2314	3.5494e-38	6.46516e-36
ENO2	1502.28	1.5044	0.1181	5.74061e-38	1.02045e-35
SULT1A2	141.7	2.2457	0.1784	2.66108e-37	4.61901e-35
FERMT3	734.273	3.8624	0.3082	3.07446e-37	5.27448e-35
TM4SF1	4815.22	1.2327	0.0982	7.84754e-37	1.30093e-34
HTRA3	79.923	4.7507	0.3794	9.17578e-37	1.50422e-34
GBE1	2839.47	1.3013	0.1045	2.32478e-36	3.64891e-34
ABCC3	61.868	4.2858	0.346	7.37171e-36	1.13294e-33
JAG1	6355.9	1.0014	0.0809	9.20256e-36	1.39974e-33
EGF	402.951	1.9463	0.1586	1.23126e-35	1.85368e-33
NFKB2	220.633	2.5918	0.2119	1.50591e-35	2.24427e-33
NR0B1	1081.93	2.4239	0.1985	2.10213e-35	3.10148e-33
ABCC2	294.945	1.9241	0.1574	2.56464e-35	3.70967e-33
SERPIND1	104.82	2.8917	0.2377	4.0728e-35	5.77789e-33
GPAT3	6815.79	1.6843	0.1388	8.49781e-35	1.19406e-32
LOC100421207	114.877	5.9628	0.4852	1.44868e-34	2.0164e-32
SLC6A6	433.505	1.7286	0.1437	2.91057e-34	4.01332e-32
TBXAS1	299.787	1.4061	0.1168	3.56845e-34	4.8749e-32
FAM83G	111.068	3.7276	0.3134	8.85211e-34	1.17661e-31
PTGR1	1776.85	1.6255	0.1361	9.08301e-34	1.19652e-31
C1S	1866.52	1.2245	0.1023	1.05982e-33	1.38377e-31
KIAA0319	76.292	4.1037	0.3463	3.65923e-33	4.61438e-31
MTARC1	183.085	2.1785	0.1869	1.90993e-32	2.29098e-30
PTPRH	299.617	1.9748	0.1708	6.53215e-32	7.66481e-30
FLNB	6419.73	1.7498	0.1516	9.03218e-32	1.0493e-29
TMEM116	442.76	1.7105	0.1491	2.19938e-31	2.47707e-29
GABARAPL1	2838.75	1.1229	0.0975	2.53702e-31	2.83569e-29
ITPKC	339.686	1.7753	0.1552	3.01251e-31	3.34185e-29
LOC729654	99.764	5.3645	0.4731	4.10485e-30	4.42065e-28
ZFAND2A	677.037	1.3714	0.1232	1.46138e-29	1.5624e-27
LIF	1154.15	2.647	0.2409	3.14717e-29	3.31667e-27
MIR193BHG	360.879	2.0857	0.1902	5.37304e-29	5.62226e-27
NES	9932.27	1.3984	0.1279	1.12581e-28	1.15348e-26
TCN2	332.845	1.904	0.1756	2.33566e-28	2.3603e-26
NDRG1	1956.68	1.4103	0.1304	4.8129e-28	4.70262e-26
AP1M2	49.706	4.4155	0.4091	8.65112e-28	8.39728e-26
NQO2	851.05	1.713	0.1597	8.89376e-28	8.57637e-26
DEDD2	263.81	1.9083	0.1783	9.52929e-28	9.07065e-26
PIM1	163.989	1.99	0.1861	1.09698e-27	1.03088e-25
EPDR1	184.096	1.6864	0.1583	2.03769e-27	1.879e-25
TTLL4	2953.49	1.599	0.1505	2.92438e-27	2.67989e-25
CRYGS	69.604	3.5605	0.3378	5.20613e-27	4.71235e-25
SPHK1	225.929	2.8932	0.2762	7.85473e-27	6.93944e-25
CYP1A1	282.415	2.4856	0.2378	1.10768e-26	9.67027e-25
SLC16A3	454.347	3.2282	0.3095	1.17742e-26	1.01589e-24
OPRD1	197.441	1.9186	0.1841	2.1439e-26	1.80749e-24
LINC02608	86.176	3.277	0.315	2.1362e-26	1.80749e-24
CREB3	871.202	1.3303	0.1272	2.31895e-26	1.9377e-24
RBCK1	719.757	1.3087	0.1251	2.3246e-26	1.9377e-24
FHL2	2191.97	1.1278	0.1085	5.64948e-26	4.5798e-24
SLC48A1	667.84	2.1747	0.212	1.00297e-25	8.08627e-24
LOC102467080	167.265	2.0079	0.1969	1.91179e-25	1.51648e-23
FGFR3	66.965	3.1452	0.3104	3.29402e-25	2.57142e-23
UPP1	682.754	1.7558	0.1729	3.48127e-25	2.7033e-23
FGFRL1	427.261	2.7075	0.2684	4.73822e-25	3.62216e-23
CBR1	2402.35	1.4207	0.1401	5.09982e-25	3.8586e-23
LINC01914	651.688	1.2681	0.1249	6.35217e-25	4.75735e-23
NRIP3	1078.46	1.1813	0.1164	7.45931e-25	5.55832e-23
NPTXR	94.429	2.408	0.2394	8.89625e-25	6.56276e-23
COL24A1	88.453	2.9566	0.2947	9.43322e-25	6.92427e-23
NOL3	211.111	1.6252	0.1618	1.07368e-24	7.84212e-23
PTPRN	49.447	5.3011	0.5251	1.23938e-24	8.91989e-23
LOC101927136	71.029	5.0746	0.5006	1.35474e-24	9.65596e-23
ALKBH6	296.489	2.3554	0.238	3.50923e-24	2.4538e-22
AFP	49.793	4.5872	0.4597	6.17037e-24	4.2541e-22
ABHD4	378.37	2.1089	0.2148	9.15278e-24	6.13819e-22
GPC1	699.958	3.4542	0.3538	9.59929e-24	6.4085e-22
LOC105372424	46.867	4.3112	0.436	1.01305e-23	6.73267e-22
SNTA1	340.121	2.1667	0.2213	1.1219e-23	7.38953e-22
SFXN5	464.826	1.7084	0.174	1.15026e-23	7.50924e-22
CHPF2	1073.63	1.9687	0.2013	1.36535e-23	8.79665e-22
MAFF	1070.36	1.7443	0.1782	1.37343e-23	8.81023e-22
BIRC3	321.131	2.5676	0.2649	2.67876e-23	1.67468e-21
ITGAX	74.174	2.9475	0.3055	4.01917e-23	2.49155e-21
STYK1	59.492	3.3074	0.3447	8.47203e-23	5.18657e-21
PFKP	1368.8	1.7318	0.1808	1.12272e-22	6.76106e-21
DLGAP1-AS2	171.58	1.6323	0.1709	1.5767e-22	9.38007e-21
SPTA1	56.421	3.1124	0.3266	1.62233e-22	9.57431e-21
BIN1	585.119	2.03	0.2136	2.0482e-22	1.19918e-20
VSIR	87.614	2.6287	0.2772	2.0953e-22	1.2219e-20
LRP10	839.361	1.6895	0.1779	2.75356e-22	1.58696e-20
SQOR	1353.15	1.2442	0.1304	2.7695e-22	1.58993e-20
SH2D6	35.55	3.4438	0.3626	2.9828e-22	1.70575e-20
TALDO1	6672.06	1.836	0.1941	3.36769e-22	1.91841e-20
FLNC	53.632	3.152	0.3337	3.50016e-22	1.98621e-20
GBP1	550.686	1.8007	0.1909	4.12335e-22	2.32198e-20
MAFG	1555.46	1.3802	0.1458	4.2922e-22	2.40787e-20
NLRP1	286.149	2.1005	0.2232	5.32686e-22	2.9546e-20
CBR3	1081.96	1.1939	0.1268	8.96021e-22	4.95127e-20
SLC2A4RG	89.083	2.4682	0.2648	1.02648e-21	5.63843e-20
MAG	394.418	2.6397	0.284	1.09313e-21	5.97334e-20
HECW1	55.888	2.917	0.3131	1.16306e-21	6.31707e-20
TNFRSF12A	821.331	3.4229	0.3697	1.19948e-21	6.4588e-20
DOLPP1	419.184	1.2196	0.1304	1.59631e-21	8.44157e-20
SERTAD1	204.625	2.2817	0.2466	1.84853e-21	9.67137e-20
TNFSF9	266.024	1.4487	0.1557	1.94219e-21	1.00898e-19
UFD1	3604.45	1.0644	0.1147	2.75598e-21	1.42174e-19
PLB1	88.479	2.0522	0.2211	2.79083e-21	1.4347e-19
LAMB3	478.977	2.1923	0.238	2.826e-21	1.44774e-19
STMN3	241.374	2.1021	0.2285	3.68977e-21	1.87075e-19
EHBP1L1	1126.3	1.2752	0.1378	4.29191e-21	2.16859e-19
RFFL	129.03	2.4638	0.2693	4.50295e-21	2.25975e-19
RAB5IF	891.962	1.5956	0.1737	5.0885e-21	2.5278e-19
TNFRSF1A	1199.6	1.3902	0.151	5.22661e-21	2.5877e-19
LOC107985423	96.675	1.9641	0.2142	5.34435e-21	2.63714e-19
SCARA3	191.795	1.7953	0.1958	5.57556e-21	2.74206e-19
NECAB3	332.068	2.7116	0.2976	5.80147e-21	2.84368e-19
DNTTIP1	685.402	1.7414	0.1902	6.17633e-21	3.0114e-19
MAP3K14	99.008	2.7411	0.3007	6.18444e-21	3.0114e-19
POFUT2	557.323	1.4137	0.1542	7.63935e-21	3.65945e-19
ADAMTS15	422.474	1.883	0.2064	7.68445e-21	3.66914e-19
PDGFA	458.075	1.3876	0.1519	1.00549e-20	4.77011e-19
SMAD7	377.508	1.2269	0.1345	1.44309e-20	6.80233e-19
SNX21	332.258	1.3119	0.1442	1.58491e-20	7.44706e-19
IKBKG	213.129	2.6149	0.2905	1.67178e-20	7.83031e-19
MSRB1	215.236	1.996	0.2215	2.00368e-20	9.26717e-19
LIMK1	601.03	2.2212	0.2475	2.48496e-20	1.14572e-18
FCER1A	166.079	2.1151	0.2367	3.66509e-20	1.66897e-18
CYTOR	401.154	1.9902	0.2227	3.76172e-20	1.7077e-18
RIMKLA	506.698	1.0783	0.1194	3.995e-20	1.80251e-18
ST8SIA2	128.286	1.5753	0.1753	4.10662e-20	1.83603e-18
AKR1C7P	64.592	6.0632	0.6578	5.83635e-20	2.60149e-18
FTLP3	1459.1	2.1591	0.2438	6.24974e-20	2.76903e-18
BICDL1	113.469	2.0918	0.2355	6.55531e-20	2.89572e-18
CCDC88B	65.019	4.1879	0.4754	8.3408e-20	3.67344e-18
BNIP3P1	1089.88	1.5123	0.1705	9.85831e-20	4.30324e-18
TUBB6	1800.48	1.2861	0.1445	9.96817e-20	4.33836e-18
SLC10A3	148.201	2.1703	0.246	1.06959e-19	4.64139e-18
PHEX	610.313	1.1602	0.1303	1.17498e-19	5.05415e-18
CLIP2	188.595	2.7314	0.3112	1.17352e-19	5.05415e-18
VEGFA	718.006	1.1186	0.1256	1.21488e-19	5.19547e-18
PCOLCE2	421.647	1.0043	0.1126	1.25752e-19	5.36228e-18
ETFB	1599.97	2.8344	0.3237	1.45713e-19	6.16001e-18
TNFAIP2	62.739	3.3035	0.3776	1.70759e-19	7.19824e-18
CTSD	1385.7	2.7236	0.3131	2.52376e-19	1.05185e-17
PTGES	82.898	2.0649	0.2365	2.65862e-19	1.10183e-17
STC1	223.299	1.5811	0.1806	2.83215e-19	1.16719e-17
DNAJC6	613.821	1.1091	0.1259	2.8696e-19	1.17933e-17
RELB	103.229	1.9931	0.2294	3.84519e-19	1.56718e-17
NT5C	218.81	2.051	0.237	4.71224e-19	1.91001e-17
TRAF2	186.971	2.4158	0.2797	4.76144e-19	1.92467e-17
FTLP2	136.695	1.8937	0.2189	5.82164e-19	2.34039e-17
TANGO2	1013.98	1.7179	0.1986	6.43128e-19	2.56452e-17
ANKRD39	235.153	2.1084	0.245	6.77815e-19	2.6883e-17
SERPINB2	3513.24	1.4716	0.1704	9.2328e-19	3.62289e-17
GSTP1	6915.3	2.1608	0.2534	9.80559e-19	3.83744e-17
AP3B2	74.177	2.7906	0.3268	1.24445e-18	4.8445e-17
EPHX1	467.212	1.6111	0.188	1.30273e-18	5.04475e-17
ZNF746	587.375	1.4297	0.1665	1.30779e-18	5.0511e-17
MAPK11	158.761	2.7655	0.3259	1.54536e-18	5.95306e-17
SSX1	102.97	2.0655	0.2431	1.94524e-18	7.45458e-17
SRF	895.859	1.1227	0.1309	2.15694e-18	8.20193e-17
SLC39A13	94.148	2.0825	0.2462	2.54966e-18	9.67037e-17
MYH14	328.317	2.3702	0.2808	2.56654e-18	9.70941e-17
AXL	369.548	1.8368	0.2177	3.31293e-18	1.24058e-16
BSDC1	1593.25	1.1674	0.1372	3.78195e-18	1.40906e-16
CAMK2G	465.076	1.0759	0.1267	4.66931e-18	1.73093e-16
LINC00520	204.155	1.5816	0.1881	5.70595e-18	2.10991e-16
LOC100507002	214.015	1.5159	0.1805	6.07243e-18	2.22867e-16
PELO	1335.92	1.0044	0.1185	6.35226e-18	2.32559e-16
MAP1A	583.943	2.1767	0.2611	6.69358e-18	2.44448e-16
CLTB	358.108	2.0069	0.241	7.81242e-18	2.84604e-16
ALAS1	2463.06	1.0578	0.1256	9.99203e-18	3.63109e-16
LTBP2	59.259	2.3866	0.2884	1.172e-17	4.20721e-16
LIMD2	87.53	2.5511	0.3093	1.25355e-17	4.4753e-16
SRGN	758.592	1.1662	0.1398	1.49675e-17	5.2957e-16
ANXA10	82.172	7.1069	0.8141	1.59846e-17	5.62857e-16
ETNK2	729.963	1.4993	0.1811	1.72477e-17	6.04447e-16
OSGIN1	938.455	3.9964	0.4894	1.86622e-17	6.49392e-16
NFKBIA	561.254	1.3437	0.1623	2.01458e-17	6.99366e-16
HSPB1	133.211	3.4872	0.427	2.0229e-17	7.00607e-16
KEAP1	1095.15	1.8826	0.2293	2.26269e-17	7.8182e-16
TXNP6	680.936	1.57	0.1915	2.78214e-17	9.56822e-16
LOC105371967	105.585	2.141	0.2623	2.91875e-17	9.94531e-16
THAP7	196.127	2.1936	0.2696	3.61169e-17	1.21383e-15
UNC13D	87.424	3.3263	0.4109	3.82687e-17	1.28031e-15
LINC01275	38.84	2.7049	0.3319	4.01377e-17	1.3398e-15
P2RX6	131.621	2.4717	0.3055	4.45331e-17	1.47319e-15
NINJ2	156.787	1.9053	0.2347	5.06118e-17	1.66309e-15
AIFM2	658.148	1.8237	0.2248	5.24904e-17	1.72098e-15
GPRC5A	895.632	1.4941	0.1835	5.34569e-17	1.74879e-15
PSMC4	4030.09	1.3603	0.1667	5.86408e-17	1.9099e-15
ACADVL	3292.28	1.6308	0.2013	6.98394e-17	2.26464e-15
PEX6	245.257	1.575	0.1945	7.13792e-17	2.30949e-15
BABAM1	1415.72	1.524	0.1881	7.36007e-17	2.37616e-15
TADA3	388.35	1.3114	0.162	9.58479e-17	3.04772e-15
TBC1D22A	501.486	1.2462	0.1539	9.97712e-17	3.16564e-15
HAGH	455.77	1.9053	0.2375	1.04642e-16	3.30598e-15
PSMB5	4875.9	1.1605	0.1432	1.09891e-16	3.45701e-15
GSTM3	1002.02	1.2846	0.1591	1.11092e-16	3.48735e-15
TNNT1	43.224	2.8523	0.3573	1.1739e-16	3.66942e-15
H2BC12	2025.4	2.4048	0.3018	1.21988e-16	3.79707e-15
NDUFB7	248.12	3.1276	0.3937	1.24609e-16	3.87049e-15
POLD4	197.666	1.572	0.1961	1.43085e-16	4.41647e-15
FAM219A	951.932	1.361	0.1692	1.45014e-16	4.46666e-15
LOC107985474	33.618	4.1319	0.5105	1.48332e-16	4.55936e-15
THAP3	154.63	1.9881	0.2497	1.60736e-16	4.92013e-15
SULT1A1	3350.56	1.6554	0.2069	1.71064e-16	5.20388e-15
HMGA1	1853.31	2.212	0.2789	1.80821e-16	5.46687e-15
H4C1	808.948	2.7938	0.3539	2.06763e-16	6.21299e-15
SYNC	30.871	3.3352	0.4193	2.21026e-16	6.6041e-15
FSCN1	425.295	2.5816	0.3272	2.24083e-16	6.66939e-15
TINAGL1	142.298	2.8716	0.3647	2.37524e-16	7.037e-15
PDLIM7	148.028	2.9283	0.3723	2.53469e-16	7.49436e-15
GAB3	141.546	1.3635	0.171	2.60356e-16	7.68257e-15
OAZ1	4372.65	1.8674	0.236	2.72445e-16	8.02326e-15
TRMT112	1867.68	1.2329	0.1545	2.80066e-16	8.21491e-15
DRAP1	459.616	1.7856	0.2256	2.79914e-16	8.21491e-15
MELTF	860.046	1.8279	0.2313	2.87054e-16	8.40317e-15
WDR13	398.603	2.0396	0.2586	2.92152e-16	8.53546e-15
STK17A	1422.79	1.2988	0.1633	2.9469e-16	8.5926e-15
POMGNT2	215.581	1.2481	0.1569	3.32154e-16	9.66587e-15
FLYWCH1	242.478	2.7603	0.3534	4.01335e-16	1.15852e-14
ZBTB17	186.014	2.1441	0.2742	4.65464e-16	1.33608e-14
PDLIM4	349.394	2.5868	0.3319	4.7249e-16	1.35362e-14
POR	1083.7	2.3398	0.3002	5.43733e-16	1.55169e-14
STXBP5L	644.136	1.224	0.155	5.47531e-16	1.55951e-14
IGFBP6	87.116	2.2368	0.2869	5.5462e-16	1.57666e-14
ARMC5	200.744	2.4584	0.3167	6.33294e-16	1.78997e-14
CARD19	174.057	3.0751	0.3978	6.85436e-16	1.93364e-14
CENPT	317.423	1.6023	0.206	9.11615e-16	2.54734e-14
PGDP1	178.833	1.5021	0.1928	1.01936e-15	2.8217e-14
SIRT7	179.257	1.7877	0.2308	1.04577e-15	2.88937e-14
RGS14	93.325	2.6014	0.3382	1.07551e-15	2.966e-14
NAA38	536.357	2.4513	0.3185	1.09107e-15	3.00329e-14
IL17RC	107.97	2.3138	0.3003	1.17212e-15	3.21439e-14
NR4A1	180.645	2.3291	0.3042	1.57596e-15	4.27421e-14
FAM43A	300.228	1.2068	0.1555	1.61795e-15	4.38004e-14
LCP1	1067.13	1.5425	0.2003	1.77275e-15	4.77283e-14
TPD52L2	2535.13	1.0228	0.1313	1.78089e-15	4.78602e-14
ITGA5	1366.64	1.5081	0.1961	1.99417e-15	5.32042e-14
BDNF	368.699	1.2856	0.1669	2.13813e-15	5.67374e-14
TUBA1C	7671.47	1.2072	0.1559	2.17461e-15	5.76018e-14
MC1R	214.951	2.1269	0.2796	2.43166e-15	6.41801e-14
AKR1C1	33.609	4.9096	0.6262	2.82915e-15	7.44052e-14
MICALL2	58.565	3.5539	0.4716	3.00881e-15	7.86801e-14
SLC38A6	1194.44	1.2915	0.1685	3.01303e-15	7.86801e-14
TMEM115	442.23	1.6759	0.22	3.12167e-15	8.13731e-14
TRAIP	249.954	1.3786	0.1804	3.23022e-15	8.4054e-14
FTL	88633	1.724	0.2271	3.63183e-15	9.36785e-14
CYP27A1	2398.55	1.5704	0.2069	4.11873e-15	1.05683e-13
TGFB1I1	123.083	2.3915	0.3176	4.23042e-15	1.08173e-13
SNAPC2	105.169	2.5585	0.341	4.78111e-15	1.21832e-13
HPCAL1	385.074	1.8254	0.2419	4.84805e-15	1.23324e-13
GSTM4	361.811	1.1945	0.1568	5.09452e-15	1.29371e-13
SPOCD1	38.007	3.2964	0.4396	5.23553e-15	1.32723e-13
LTBR	1545.71	1.3567	0.1787	5.2487e-15	1.32829e-13
DDX60L	584.517	1.1342	0.149	5.88911e-15	1.48273e-13
SLC26A11	162.066	1.5349	0.204	7.00939e-15	1.75282e-13
CENPX	578.84	2.045	0.2734	7.05045e-15	1.76011e-13
LMNA	5483.97	1.9954	0.2677	7.69466e-15	1.91445e-13
IL11	31.073	3.6664	0.4887	7.83077e-15	1.94504e-13
STRN4	869.941	1.5189	0.2026	9.25303e-15	2.28675e-13
TMCO4	260.147	1.2118	0.161	1.00802e-14	2.47872e-13
VSIG10L	102.044	1.6641	0.2229	1.03556e-14	2.5422e-13
SSNA1	226.213	3.0811	0.4184	1.14225e-14	2.79481e-13
GGT1	31.658	2.7901	0.3774	1.17576e-14	2.87205e-13
ARHGEF19	97.305	1.6466	0.2217	1.32405e-14	3.22893e-13
DUSP5	305.129	1.363	0.1829	1.50805e-14	3.65348e-13
TWF2	478.077	2.261	0.3078	1.71776e-14	4.12096e-13
BAD	125.392	2.8691	0.3918	1.71657e-14	4.12096e-13
IRF1	255.759	1.1346	0.152	1.80838e-14	4.3313e-13
PMAIP1	559.102	1.3273	0.1788	1.85037e-14	4.41754e-13
LINC01588	163.384	1.4867	0.2008	1.8827e-14	4.48745e-13
NDUFB4	800.413	1.3786	0.1865	2.24079e-14	5.3152e-13
KRT18	630.997	1.5882	0.2157	2.2666e-14	5.36781e-13
STK25	701.663	1.3168	0.1787	2.93775e-14	6.85816e-13
VGF	216.029	2.059	0.2828	2.99104e-14	6.96053e-13
BRINP2	29.244	3.6486	0.4988	3.01373e-14	7.0023e-13
RHOC	1441.39	1.8375	0.2522	3.24832e-14	7.53406e-13
ID1	416.531	1.4889	0.2034	3.2877e-14	7.60292e-13
PSMB6	4159.99	1.4574	0.1986	3.30783e-14	7.6375e-13
LIN7B	39.321	2.716	0.3749	3.55901e-14	8.19183e-13
ENO1	57257.2	1.3003	0.177	3.56686e-14	8.1971e-13
CDAN1	426.749	1.4644	0.2003	3.69079e-14	8.46873e-13
PTHLH	42.013	2.6906	0.371	3.9445e-14	9.02282e-13
ACOT7	1112.62	1.8123	0.2498	4.27473e-14	9.73293e-13
BCL7C	279.491	2.0853	0.2895	5.34724e-14	1.20817e-12
KLHL21	1787.55	1.4947	0.2061	5.69397e-14	1.28258e-12
TMUB2	401.124	1.2466	0.1711	5.90392e-14	1.32784e-12
LOC105369484	59.362	2.4004	0.3344	6.01811e-14	1.35146e-12
GLRX	427.038	1.251	0.1722	6.54519e-14	1.46315e-12
R3HCC1	275.083	1.52	0.2104	6.6904e-14	1.4866e-12
HGS	1208.51	1.7224	0.2393	6.99288e-14	1.54914e-12
ZYX	375.266	2.5664	0.3599	7.49139e-14	1.65461e-12
PLEKHF1	95.446	2.4037	0.337	7.5404e-14	1.66046e-12
TMEM205	425.849	1.9329	0.27	7.87266e-14	1.72476e-12
SIN3B	241.843	1.1958	0.165	8.60042e-14	1.87431e-12
HDAC5	224.717	1.9534	0.2734	8.65724e-14	1.88391e-12
TEX13C	535.004	1.3841	0.1919	8.68821e-14	1.88786e-12
CUL7	646.812	1.4424	0.2003	9.00612e-14	1.95119e-12
NCAPH2	782.453	1.9868	0.2786	9.8826e-14	2.13481e-12
HAUS5	282.651	1.2267	0.17	9.92022e-14	2.13981e-12
CSRNP1	124.974	1.8023	0.2523	9.98254e-14	2.15011e-12
MRPL17	1655.86	1.0347	0.1427	1.03264e-13	2.2177e-12
AKR1C3	45.359	6.3293	0.8429	1.07428e-13	2.30377e-12
HVCN1	119.254	1.6705	0.2345	1.21186e-13	2.58005e-12
LOC105374775	86.332	1.6506	0.2313	1.26534e-13	2.68616e-12
MON1A	129.88	1.9648	0.278	1.50798e-13	3.16034e-12
NCS1	1325.42	1.2718	0.1781	1.66482e-13	3.47422e-12
UBL4A	1337.49	1.3426	0.1883	1.68483e-13	3.51102e-12
UCHL1	35.483	3.6847	0.5239	1.78588e-13	3.71635e-12
PMM1	278.386	1.9791	0.281	1.80563e-13	3.74688e-12
ALDH4A1	237.12	1.8141	0.2574	1.90964e-13	3.94053e-12
SIGIRR	60.62	2.4849	0.3547	1.99677e-13	4.11456e-12
DGCR6L	272.778	2.557	0.3662	2.11703e-13	4.35629e-12
SLC8B1	168.95	1.312	0.1848	2.12387e-13	4.35821e-12
METTL27	38.788	3.134	0.4513	2.28213e-13	4.66997e-12
FSTL3	120.801	1.8854	0.2693	2.59986e-13	5.30544e-12
CACNA2D4	60.14	1.6802	0.2389	2.62483e-13	5.34899e-12
IFI35	375.929	1.7102	0.2439	2.64197e-13	5.3765e-12
INO80E	290.212	1.4127	0.2005	2.65471e-13	5.39498e-12
CARD10	333.655	2.4118	0.3471	2.87686e-13	5.83038e-12
E4F1	97.005	2.501	0.3602	2.88289e-13	5.83459e-12
PPP1R15A	707.072	1.2394	0.1755	3.00937e-13	6.08223e-12
METTL22	282.715	1.2613	0.1788	3.19276e-13	6.42647e-12
LOC151760	69.06	2.1933	0.3158	3.3502e-13	6.73418e-12
DNAL4	244.51	1.6273	0.2332	3.57282e-13	7.15243e-12
RNF181	1050.9	1.4316	0.2043	3.66102e-13	7.31907e-12
GPR55	22.438	5.0009	0.696	3.67394e-13	7.33495e-12
LMF2	416.94	2.1115	0.3049	3.82529e-13	7.62681e-12
SWI5	537.288	1.3157	0.1877	3.96702e-13	7.89871e-12
DNPEP	624.43	1.3912	0.1988	4.11498e-13	8.18226e-12
NOSIP	591.391	2.1718	0.3145	4.29724e-13	8.51026e-12
EML2	375.039	1.6865	0.2431	4.55063e-13	9.00001e-12
A4GALT	88.309	1.8964	0.2741	4.62206e-13	9.11682e-12
LOC100507507	75.55	1.912	0.2762	4.67425e-13	9.20745e-12
LOC105369370	33.233	3.7246	0.5371	4.76251e-13	9.36881e-12
SPRYD3	402.341	1.3436	0.1928	5.12465e-13	1.0041e-11
LAT	245.882	1.6064	0.2317	5.32924e-13	1.04005e-11
GPT2	240.871	1.0932	0.1561	5.47257e-13	1.0652e-11
DAPK3	216.79	2.4993	0.3656	5.86011e-13	1.13465e-11
GPX4	618.849	1.8311	0.2662	6.29519e-13	1.2128e-11
PNPLA6	139.242	2.0042	0.2924	6.60169e-13	1.2666e-11
AVPI1	1097.8	1.0246	0.1464	6.71952e-13	1.28753e-11
CEBPB	432.47	1.2445	0.1793	6.79458e-13	1.30022e-11
MAP7D1	965.277	1.5223	0.2205	6.82832e-13	1.30499e-11
ASPSCR1	129.589	2.247	0.329	6.92845e-13	1.3207e-11
FTH1	263.987	3.84	0.5673	7.27889e-13	1.38393e-11
CTIF	97.3	1.3799	0.1995	7.49009e-13	1.4186e-11
SH3TC1	222.651	2.1411	0.3139	7.8666e-13	1.488e-11
CD55	1250.08	1.0022	0.1437	7.89246e-13	1.49098e-11
VASP	1026.02	1.2295	0.1777	8.42614e-13	1.58773e-11
TYSND1	186.307	1.5426	0.2246	8.55148e-13	1.60929e-11
PFKL	667.663	2.1617	0.3172	8.56478e-13	1.60974e-11
SLC1A5	2838.03	1.3258	0.1923	8.89025e-13	1.66244e-11
HYAL2	463.462	1.7989	0.2633	8.88811e-13	1.66244e-11
ACOX3	162.116	1.2416	0.1798	8.92081e-13	1.66605e-11
FLYWCH2	198.903	1.6774	0.2452	8.97583e-13	1.6742e-11
MVB12A	133.082	1.9127	0.2807	9.29268e-13	1.73111e-11
ARHGEF10L	205.903	1.9034	0.2793	9.37792e-13	1.74479e-11
BCAN-AS1	117.071	1.5869	0.2317	9.72038e-13	1.80169e-11
NPLOC4	4590.13	1.0228	0.1473	9.79674e-13	1.81129e-11
TRIOBP	798.062	1.6273	0.2381	1.00802e-12	1.85903e-11
CYBA	243.61	2.2631	0.3341	1.02129e-12	1.88116e-11
KLF2	61.766	1.9827	0.2916	1.05887e-12	1.94631e-11
SH3BGRL3	883.816	1.662	0.2439	1.07285e-12	1.96632e-11
TMEM54	146.148	2.5215	0.3736	1.07244e-12	1.96632e-11
WBP2	634.22	1.3415	0.1953	1.09994e-12	2.01347e-11
NDUFS8	229.108	2.0843	0.3078	1.15493e-12	2.10889e-11
SMIM29	239.771	1.6952	0.2492	1.16945e-12	2.13013e-11
TNFRSF8	18.132	4.3747	0.634	1.28837e-12	2.3352e-11
FES	333.735	2.0422	0.3028	1.35753e-12	2.45152e-11
VWA1	177.841	2.9679	0.4429	1.36215e-12	2.45686e-11
HHIPL2	26.606	4.1444	0.607	1.37295e-12	2.4703e-11
TRMT2A	360.928	2.1279	0.3159	1.40965e-12	2.53325e-11
ATG101	1564.47	1.6231	0.2393	1.46155e-12	2.61696e-11
SH3BP5	130.836	1.6286	0.2401	1.4647e-12	2.61942e-11
SLC3A2	4481.5	1.236	0.1808	1.50195e-12	2.67953e-11
USP5	3097.11	1.5399	0.2263	1.50897e-12	2.68881e-11
PPFIA3	56.123	2.1987	0.3269	1.51824e-12	2.70207e-11
KIFC3	478.409	2.1776	0.3241	1.53504e-12	2.72867e-11
ADAM15	1444.6	1.8478	0.2741	1.62347e-12	2.87548e-11
RPL35P2	105.042	2.1873	0.326	1.66813e-12	2.95102e-11
BRSK1	33.839	2.2831	0.3396	1.69586e-12	2.99649e-11
FAM160B2	112.81	1.6558	0.2451	1.70496e-12	3.00836e-11
COL6A2	81.358	2.6327	0.3942	1.72128e-12	3.03052e-11
ZNF576	294.316	1.0021	0.146	1.74598e-12	3.07035e-11
HDHD5	996.212	1.2361	0.1816	1.83156e-12	3.21318e-11
MCAM	12130.8	1.1425	0.1677	1.90094e-12	3.32698e-11
LINC01270	116.069	1.3427	0.1981	1.93972e-12	3.39082e-11
ABCA2	41.143	2.3927	0.3578	1.95055e-12	3.40572e-11
GFER	324.354	1.6286	0.2419	1.99504e-12	3.47518e-11
TMEM259	279.772	2.118	0.317	2.08261e-12	3.61919e-11
KRT8	157.696	2.1863	0.3275	2.08883e-12	3.62572e-11
LOC105375674	58.327	1.7779	0.2646	2.20295e-12	3.80589e-11
LOC107985541	33.984	5.949	0.8385	2.20211e-12	3.80589e-11
OGFOD2	89.737	2.1905	0.3288	2.23303e-12	3.84868e-11
ATP6V1F	946.549	1.286	0.19	2.23554e-12	3.84868e-11
TERC	159.853	2.8304	0.427	2.25851e-12	3.8837e-11
STUB1	109.966	2.6435	0.3989	2.37398e-12	4.06803e-11
FKBP8	362.876	2.4466	0.3685	2.41034e-12	4.11598e-11
VRK3	620.662	1.0143	0.1489	2.48202e-12	4.2335e-11
DYNC2I2	222.554	2.0269	0.3043	2.49646e-12	4.2532e-11
EDF1	1269.82	1.8286	0.2738	2.53198e-12	4.30378e-11
SLC4A2	892.121	1.9081	0.2859	2.55834e-12	4.34358e-11
TECRP1	80.483	2.242	0.3383	2.83471e-12	4.7798e-11
TUBB4B	3648.75	1.4739	0.2198	2.83202e-12	4.7798e-11
DVL1	188.807	2.4965	0.3778	2.84648e-12	4.79418e-11
NDUFA13	1111.85	2.1869	0.33	2.89567e-12	4.87146e-11
DOK1	69.254	2.1605	0.3258	2.90552e-12	4.87691e-11
WTIP	136.672	1.5897	0.2379	2.99639e-12	5.01801e-11
TUBB3	1091.21	1.9239	0.2898	3.08445e-12	5.14797e-11
LINC02487	30.734	2.6142	0.393	3.14071e-12	5.23003e-11
MYG1	393.074	1.4867	0.2227	3.37325e-12	5.58573e-11
BORCS8	143.859	1.6413	0.2467	3.4782e-12	5.74021e-11
DNM1	29.397	2.6145	0.3955	3.54518e-12	5.83116e-11
FAM3A	201.63	2.2608	0.3435	3.80198e-12	6.2466e-11
FAM163A	92.744	1.3275	0.1984	3.82378e-12	6.27542e-11
MEA1	2049.81	1.1754	0.1752	3.94302e-12	6.46392e-11
RN7SK	756340	2.087	0.3168	4.02965e-12	6.5986e-11
C19orf25	107.494	2.4017	0.3661	4.09072e-12	6.669e-11
S1PR2	268.731	1.0301	0.153	4.17135e-12	6.79295e-11
ACTN1	1963.03	1.2988	0.1948	4.40917e-12	7.14082e-11
S100A16	832.236	1.3471	0.2022	4.48526e-12	7.24021e-11
EVA1B	41.142	3.2437	0.4982	4.82588e-12	7.77304e-11
TMEM198	64.519	2.1217	0.3236	4.85102e-12	7.80501e-11
PSAP	22781.1	1.0179	0.1513	5.01791e-12	8.05596e-11
RABEP2	82.347	3.0231	0.465	5.02374e-12	8.05655e-11
MIGA2	149.957	1.4861	0.2245	5.06489e-12	8.11372e-11
SEMA6B	50.05	2.6102	0.4	5.07865e-12	8.12695e-11
COL9A3	1594.01	1.5398	0.2331	5.08972e-12	8.13583e-11
PPFIA4	63.395	1.743	0.2651	5.63083e-12	8.94266e-11
MRPL28	665.002	1.6581	0.2521	5.68444e-12	9.01165e-11
SH2D5	52.846	2.1335	0.3264	5.83945e-12	9.23421e-11
TMED1	179.016	2.1455	0.329	5.96303e-12	9.39941e-11
TXN	6776.02	1.7625	0.2687	6.00725e-12	9.44893e-11
ZNF593	237.551	2.0078	0.3075	6.10772e-12	9.59674e-11
MAP4K2	174.352	1.5007	0.2278	6.14655e-12	9.64747e-11
GNAZ	152.518	1.2057	0.1816	6.1832e-12	9.68644e-11
SPAG7	623.736	1.2598	0.1903	6.2123e-12	9.71965e-11
H4C12	65.779	3.1069	0.4811	6.40194e-12	1.00057e-10
FADS3	243.74	2.3225	0.3574	6.41983e-12	1.00231e-10
PPM1F	1253.83	1.256	0.1894	6.46912e-12	1.00894e-10
ZP1	38.249	3.2173	0.4972	6.54194e-12	1.01922e-10
NOL12	568.561	1.7341	0.2649	6.57555e-12	1.02337e-10
RENBP	230.861	1.8521	0.2836	6.64816e-12	1.03358e-10
ZBTB48	116.414	1.9084	0.2926	6.71251e-12	1.04139e-10
EIPR1	674.299	1.2267	0.1853	6.73407e-12	1.04364e-10
PTOV1	320.019	1.8345	0.281	6.758e-12	1.04625e-10
STC2	46.404	2.0808	0.3192	6.93937e-12	1.07208e-10
IFT27	286.864	1.2385	0.1874	7.10352e-12	1.09514e-10
CNN2	1221.72	1.8234	0.2798	7.21561e-12	1.11126e-10
ZMAT5	254.919	1.8668	0.2865	7.36438e-12	1.13181e-10
ZNF513	139.579	2.0188	0.3107	7.45605e-12	1.14471e-10
GAK	708.992	1.471	0.2242	7.49547e-12	1.14837e-10
SLC52A2	302.195	2.2602	0.3494	8.17452e-12	1.24852e-10
ATP6V0B	2159.55	1.5655	0.2397	8.71446e-12	1.32686e-10
RAMP1	58.145	3.2391	0.5052	8.94839e-12	1.35968e-10
LOC107986973	24.31	3.1688	0.4841	9.07701e-12	1.3778e-10
RAD23A	478.521	1.5464	0.2373	9.30534e-12	1.40956e-10
DDA1	180.865	1.4727	0.2256	9.33427e-12	1.41107e-10
MYADM	487.476	1.42	0.2174	9.33447e-12	1.41107e-10
PSMD3	4418	1.2303	0.1879	9.46976e-12	1.4286e-10
AGTRAP	285.135	2.1138	0.3273	9.69981e-12	1.45883e-10
G6PD	1416.45	1.97	0.3049	1.00626e-11	1.51032e-10
RNF25	475.711	1.1152	0.1695	1.01783e-11	1.52612e-10
SLC12A4	497.411	1.5651	0.2406	1.02872e-11	1.54088e-10
CLDN4	20.412	5.281	0.789	1.1207e-11	1.66849e-10
TSPAN9	533.154	1.4393	0.2216	1.13566e-11	1.68737e-10
SHARPIN	89.564	2.1989	0.3425	1.15962e-11	1.72123e-10
KCNK3	19.8	3.8835	0.5962	1.22251e-11	1.81094e-10
TMEM14DP	231.215	1.2874	0.1978	1.28521e-11	1.8962e-10
PKM	15244.5	1.0869	0.1659	1.29864e-11	1.91218e-10
ANAPC11	656.143	2.2951	0.3596	1.3208e-11	1.94287e-10
OGFR	294.057	1.7523	0.2727	1.38983e-11	2.04036e-10
YIPF2	89.968	1.9724	0.3078	1.38857e-11	2.04036e-10
RPS19P1	129.528	1.3283	0.2048	1.43335e-11	2.10006e-10
LGALS1	8437.59	1.8955	0.2948	1.47879e-11	2.1602e-10
SPSB2	48.042	2.5424	0.3996	1.53915e-11	2.23951e-10
ANAPC1P4	173.342	1.0935	0.1675	1.54166e-11	2.24095e-10
AIP	336.615	2.0808	0.3261	1.54425e-11	2.2425e-10
CD151	1076.3	2.2433	0.3524	1.57662e-11	2.28502e-10
LSM10	219.167	1.1726	0.1804	1.59308e-11	2.30434e-10
TPRA1	306.86	1.8026	0.2818	1.60134e-11	2.31403e-10
PMF1	535.579	1.3837	0.2143	1.60374e-11	2.31522e-10
SHC1	3061.33	1.0518	0.1613	1.70308e-11	2.45383e-10
JUN	295.974	1.3876	0.2154	1.79887e-11	2.5868e-10
RFPL1S	40.717	6.7534	0.9735	1.80098e-11	2.58731e-10
COPE	389.407	2.5939	0.4107	1.8297e-11	2.62346e-10
AURKAIP1	709.048	2.1335	0.3359	1.84064e-11	2.63659e-10
ULBP2	121.843	1.3084	0.2027	1.85643e-11	2.65148e-10
EFHD2	501.914	1.5215	0.2368	1.85526e-11	2.65148e-10
GRK6	326.83	2.1548	0.3395	1.85909e-11	2.65271e-10
ADPRS	702.78	1.3244	0.2056	1.86928e-11	2.66211e-10
TMEM120A	210.083	1.7175	0.2691	1.92212e-11	2.73208e-10
LRRC8A	471.295	1.3509	0.21	1.98329e-11	2.80821e-10
DEF6	93.481	1.5942	0.2491	1.9876e-11	2.8116e-10
BCL2L12	109.225	1.7342	0.2721	2.05957e-11	2.91062e-10
PSMD8	5737.65	1.1742	0.1816	2.06523e-11	2.91583e-10
NECTIN2	588.679	1.4877	0.2325	2.1291e-11	2.9974e-10
ABCB9	110.332	1.8108	0.2848	2.14953e-11	3.02039e-10
BRAT1	192.364	2.3125	0.3664	2.17654e-11	3.05413e-10
RELT	124.352	1.8664	0.294	2.18029e-11	3.05488e-10
H3C1	641.368	2.3216	0.368	2.21524e-11	3.09798e-10
HR	365.344	2.1893	0.3466	2.23951e-11	3.12895e-10
NUBP2	176.839	2.6685	0.4249	2.35065e-11	3.27493e-10
TRIM3	106.383	1.4064	0.2197	2.37986e-11	3.30626e-10
ILK	120.207	2.1492	0.3406	2.38418e-11	3.30914e-10
TMEM161A	104.006	2.9376	0.4691	2.48412e-11	3.44139e-10
GPSM1	140.706	2.0193	0.3204	2.59982e-11	3.59491e-10
LOC107984551	148.548	1.5827	0.2493	2.65506e-11	3.66443e-10
MRPL54	236.413	2.2086	0.3517	2.71418e-11	3.74252e-10
CAPN10	133.093	2.0721	0.3293	2.77041e-11	3.81294e-10
RECQL4	111.67	2.5471	0.407	2.79232e-11	3.8395e-10
JUNB	45.171	2.4475	0.3904	2.94592e-11	4.04317e-10
NLRP4	52.416	2.3696	0.3781	2.96537e-11	4.06608e-10
ZNF76	195.782	1.3235	0.2077	3.06679e-11	4.19346e-10
ASL	211.255	1.8777	0.2987	3.09068e-11	4.22221e-10
MAPK12	502.575	2.1675	0.3459	3.10763e-11	4.24143e-10
GNA11	371.375	1.7056	0.2706	3.28902e-11	4.47246e-10
FLII	1272.54	1.509	0.2385	3.36653e-11	4.56944e-10
EIF3G	850.45	1.4328	0.2259	3.45374e-11	4.68349e-10
UNC119	280.127	1.4157	0.2235	3.47013e-11	4.7014e-10
GET4	414.942	1.2328	0.1936	3.50828e-11	4.74003e-10
DNAJB4	3096.33	1.0201	0.1591	3.65092e-11	4.91028e-10
DRG2	538.674	1.4987	0.2357	3.65691e-11	4.91385e-10
GTPBP2	1176.78	1.0908	0.1707	3.73471e-11	5.01382e-10
HMG20B	426.07	1.5585	0.2473	3.76581e-11	5.05098e-10
CDC37	1808.08	1.3887	0.2192	3.91986e-11	5.25282e-10
RPL23AP82	113.335	1.6412	0.2615	3.92916e-11	5.26052e-10
CD82	114.887	2.0652	0.3315	3.99261e-11	5.33578e-10
ERCC1	1477.89	1.2097	0.1902	3.99926e-11	5.33983e-10
BRF2	175.46	1.467	0.233	4.06045e-11	5.40685e-10
LOC642846	36.358	1.9963	0.3191	4.05688e-11	5.40685e-10
MPDU1	2536.82	1.0145	0.1585	4.10121e-11	5.44638e-10
XAB2	90.587	1.9469	0.3125	4.29846e-11	5.70318e-10
UBE2SP1	264.797	1.9561	0.314	4.4311e-11	5.8739e-10
PLIN3	676.344	1.2276	0.1941	4.45256e-11	5.89704e-10
NUPR1	68.977	1.6694	0.2665	4.46146e-11	5.90353e-10
DHX30	1196.97	1.0821	0.1699	4.51856e-11	5.96839e-10
MROH1	59.364	1.8491	0.2966	4.68544e-11	6.17774e-10
IMPA2	193.318	1.1166	0.176	4.8081e-11	6.32816e-10
PUSL1	94.012	2.1357	0.3448	4.87907e-11	6.40442e-10
TRMT1	133.965	1.5438	0.2467	4.94649e-11	6.48715e-10
CAPNS1	2982.13	1.004	0.1577	5.0399e-11	6.60379e-10
MFSD12	823.868	1.8758	0.3021	5.14355e-11	6.72255e-10
GAPDH	48227.6	1.4915	0.2388	5.77909e-11	7.49909e-10
LAGE3	272.458	1.7297	0.2788	5.97359e-11	7.74466e-10
H1-4	3483.73	1.8899	0.3049	6.19571e-11	7.99751e-10
PSMA7	8610.26	1.062	0.1681	6.34964e-11	8.17475e-10
PKDCC	693.72	1.5053	0.2418	6.34555e-11	8.17475e-10
FAM174C	67.191	3.3237	0.5444	6.3683e-11	8.19162e-10
SRC	431.491	1.2579	0.2005	6.38993e-11	8.21229e-10
BTBD6	314.565	1.3658	0.2186	6.4181e-11	8.2413e-10
ADRM1	1229.65	2.1736	0.3534	6.42994e-11	8.24933e-10
ACSF3	198.307	1.2413	0.1982	6.87382e-11	8.75033e-10
LRRC14	158.98	1.7793	0.2881	6.98443e-11	8.86819e-10
PRDX2	791.948	1.5404	0.2483	7.03496e-11	8.92466e-10
KDM4B	182.977	1.3862	0.2225	7.13121e-11	9.03899e-10
TIMM17B	544.394	1.6804	0.2719	7.28848e-11	9.21334e-10
NELFB	301.747	1.8558	0.3013	7.29374e-11	9.21334e-10
ESS2	223.319	1.676	0.2712	7.29225e-11	9.21334e-10
CCDC22	220.242	2.0084	0.327	7.32677e-11	9.23925e-10
PYGB	5020.62	1.5844	0.2569	7.35163e-11	9.25637e-10
GPS1	728.292	1.9654	0.3193	7.40219e-11	9.30255e-10
POC1A	352.003	1.1991	0.1916	7.42154e-11	9.31893e-10
KIF21B	126.591	1.6432	0.2657	7.57295e-11	9.49289e-10
DCAF15	84.623	2.3588	0.3859	7.69137e-11	9.61682e-10
BNIP3	2440.11	1.215	0.1943	7.70633e-11	9.62736e-10
TJAP1	216.521	1.2975	0.2081	7.81583e-11	9.7559e-10
PFKFB4	264.255	1.4818	0.2392	7.86634e-11	9.81065e-10
CFAP251	76.074	1.5522	0.2501	8.05294e-11	1.0018e-09
GPS2	532.175	1.2225	0.1958	8.19503e-11	1.01861e-09
PSMC3	3190.72	1.1856	0.1899	8.37753e-11	1.03955e-09
ZNF446	49.552	2.1369	0.3498	8.86196e-11	1.09781e-09
CHMP1A	719.431	1.9037	0.311	9.06648e-11	1.12126e-09
TEDC2	235.304	1.9635	0.3218	9.63023e-11	1.188e-09
CAVIN1	1008.13	1.4936	0.2424	9.6839e-11	1.19362e-09
KIF3C	442.393	1.1468	0.1843	9.79805e-11	1.20668e-09
DOK4	541.782	1.3618	0.2204	9.9633e-11	1.22499e-09
COMMD5	211.012	1.3627	0.2206	9.99857e-11	1.2283e-09
PSMG3	713.047	1.2001	0.1936	1.0692e-10	1.31022e-09
GDI1	1425.21	1.1462	0.1845	1.08041e-10	1.32285e-09
RPS8P8	1101.66	1.2104	0.195	1.09414e-10	1.33855e-09
RXRA	584.065	1.184	0.1911	1.09538e-10	1.33896e-09
CYBC1	314.843	1.4655	0.2387	1.14995e-10	1.40334e-09
PLCD3	101.779	1.4846	0.2419	1.15892e-10	1.41312e-09
FLNA	16385.8	1.9699	0.3241	1.17629e-10	1.43311e-09
SPAG4	21.968	2.815	0.4636	1.192e-10	1.44866e-09
ENTPD6	1127.71	1.3165	0.2137	1.19989e-10	1.45705e-09
PHPT1	275.329	2.1186	0.3501	1.22374e-10	1.4848e-09
MUS81	299.585	1.4055	0.229	1.2592e-10	1.52656e-09
DEF8	893.047	1.1843	0.1918	1.33023e-10	1.60608e-09
NUDT14	71.059	2.4024	0.3992	1.3548e-10	1.6344e-09
GAPDHP60	547.426	1.2938	0.2104	1.36511e-10	1.64549e-09
TP53I13	129.013	2.6824	0.4477	1.41845e-10	1.70007e-09
PIM3	733.962	1.361	0.2224	1.41826e-10	1.70007e-09
CLCF1	17.713	4.3772	0.7053	1.42119e-10	1.70196e-09
SGIP1	38.911	2.4204	0.3991	1.435e-10	1.71572e-09
E2F4	1292.29	1.2319	0.2005	1.48273e-10	1.76706e-09
RIC8A	1205.63	1.1687	0.1899	1.4884e-10	1.77238e-09
ZDHHC18	278.958	1.2877	0.2101	1.50891e-10	1.79391e-09
ZFPL1	162.262	2.01	0.3337	1.55377e-10	1.84427e-09
HDAC7	258.718	1.4313	0.2348	1.58183e-10	1.87608e-09
THOP1	444.898	1.4979	0.2463	1.59361e-10	1.88853e-09
MINDY1	667.647	1.0412	0.1685	1.59967e-10	1.89418e-09
PAXX	68.765	2.7114	0.4541	1.60574e-10	1.89832e-09
TMEM222	340.913	1.7296	0.286	1.6275e-10	1.9179e-09
GEMIN4	585.658	1.0476	0.1696	1.63651e-10	1.92698e-09
TXNP4	84.037	1.5016	0.2472	1.64261e-10	1.93108e-09
C7orf50	483.858	1.9704	0.3276	1.64757e-10	1.93537e-09
G6PC3	525.199	1.48	0.2435	1.65724e-10	1.94364e-09
SEC13	2484.78	1.0186	0.1648	1.69952e-10	1.99006e-09
R3HDM4	136.723	1.3943	0.2292	1.76918e-10	2.06998e-09
SGSH	160.384	1.2607	0.2063	1.77641e-10	2.0768e-09
FOSL1	62.867	1.9843	0.3299	1.83329e-10	2.13991e-09
RHBDD2	285.023	1.729	0.287	1.83884e-10	2.14468e-09
TNIP1	415.514	1.4469	0.2385	1.84867e-10	2.15445e-09
DNAJC5	1429.05	1.2477	0.2046	1.94097e-10	2.25845e-09
KCTD5	784.431	1.2465	0.2044	1.95484e-10	2.27279e-09
CDC34	246.664	1.6018	0.2656	1.95985e-10	2.27682e-09
TUBB2A	1704.64	1.6722	0.2769	1.97455e-10	2.29209e-09
CLPP	147.584	1.564	0.259	1.99303e-10	2.30991e-09
DLGAP1-AS1	129.56	1.1976	0.1961	1.99853e-10	2.31447e-09
GALE	693.204	1.3914	0.2295	2.00589e-10	2.32117e-09
CRIP2	65.325	3.0328	0.5126	2.06602e-10	2.38758e-09
ARHGEF40	1204.37	1.1595	0.1897	2.07465e-10	2.39323e-09
GADD45GIP1	251.294	2.1458	0.36	2.08698e-10	2.40557e-09
ARMC7	115.51	1.1479	0.188	2.09633e-10	2.41446e-09
MKNK2	318.726	1.3097	0.2157	2.11426e-10	2.43321e-09
TEX264	444.049	1.3875	0.2292	2.15973e-10	2.47781e-09
XYLT2	301.935	1.4832	0.2458	2.18526e-10	2.50516e-09
C1R	85.707	1.5309	0.2539	2.20626e-10	2.52726e-09
IRF3	269.745	1.9159	0.3208	2.21584e-10	2.53627e-09
C19orf53	756.86	1.4808	0.2458	2.28524e-10	2.61165e-09
TAFA5	126.407	1.279	0.2109	2.28859e-10	2.61346e-09
KCTD17	272.687	1.7746	0.2968	2.32708e-10	2.65535e-09
RABGGTA	129.5	1.4604	0.2422	2.38477e-10	2.71488e-09
CATSPER1	17.609	4.0546	0.6717	2.52708e-10	2.86805e-09
RUVBL2	1426.4	1.7845	0.2989	2.53987e-10	2.87812e-09
AMPD3	26.906	2.8016	0.4697	2.53794e-10	2.87812e-09
DDRGK1	594.824	1.5929	0.2659	2.56014e-10	2.89888e-09
AK1	358.43	1.4853	0.2473	2.56531e-10	2.9025e-09
C19orf48	567.854	1.9604	0.3298	2.60176e-10	2.94149e-09
SDSL	81.586	2.4313	0.4121	2.68722e-10	3.0265e-09
MCOLN1	72.049	1.8813	0.3162	2.70031e-10	3.03893e-09
FASTK	158.303	2.1562	0.3645	2.73257e-10	3.07289e-09
TAF1C	130.48	1.8561	0.3123	2.78549e-10	3.13001e-09
NDUFA7	443.929	1.437	0.2391	2.81801e-10	3.16415e-09
EFEMP2	169.786	1.7216	0.2891	2.84415e-10	3.18936e-09
DMTN	266.093	1.5395	0.2576	2.95661e-10	3.30719e-09
ISG20	222.378	1.7571	0.2957	3.0255e-10	3.37656e-09
H3C2	4957.85	1.6235	0.2735	3.04074e-10	3.39101e-09
RN7SL5P	94.576	2.2667	0.3848	3.07287e-10	3.42425e-09
PREB	990.453	1.2883	0.2142	3.08087e-10	3.43058e-09
NUBP1	473.705	1.0914	0.1801	3.11498e-10	3.46333e-09
LONP1	619.148	1.5727	0.2638	3.14764e-10	3.49438e-09
SLC22A23	408.023	1.0156	0.1676	3.48441e-10	3.84798e-09
GAA	129.893	1.9032	0.3226	3.48747e-10	3.84848e-09
HS1BP3	620.863	1.4684	0.2468	3.70582e-10	4.07116e-09
TBKBP1	113.922	1.5994	0.2698	3.7663e-10	4.12838e-09
DNAJB2	786.072	1.5111	0.2547	3.89781e-10	4.2662e-09
BTBD19	63.348	1.2444	0.2078	3.9111e-10	4.27757e-09
CSF1	43.87	1.7839	0.3019	3.93427e-10	4.29653e-09
MAPK4	568.084	1.0476	0.1737	3.96059e-10	4.32208e-09
TRPV2	995.996	1.3509	0.2269	4.11029e-10	4.47552e-09
IMPDH1	244.466	1.7519	0.2974	4.13994e-10	4.50116e-09
TIAM2	40.991	2.0143	0.3425	4.15086e-10	4.50638e-09
SCAND1	51.314	3.3725	0.5826	4.2005e-10	4.55358e-09
PC	195.549	1.7804	0.3027	4.23326e-10	4.58236e-09
BCAS4	91.824	1.4713	0.2484	4.29974e-10	4.6441e-09
STK40	521.949	1.435	0.2419	4.30925e-10	4.65097e-09
RASSF4	366.181	1.0197	0.1685	4.31262e-10	4.6512e-09
GUK1	687.975	2.229	0.3822	4.33961e-10	4.67689e-09
CDC42EP1	121.752	1.7185	0.292	4.35487e-10	4.68991e-09
CCDC103	57.969	1.5516	0.2623	4.39458e-10	4.72922e-09
CIB1	425.896	1.487	0.2515	4.54503e-10	4.884e-09
FAH	1773.24	1.2175	0.2043	4.55645e-10	4.89271e-09
IRAK1	1724.03	1.3011	0.2194	4.80049e-10	5.13235e-09
NCLN	476.449	1.9768	0.3385	4.81292e-10	5.14191e-09
MCRIP2	36.752	3.0608	0.5295	4.82478e-10	5.15085e-09
ROGDI	94.507	1.9436	0.333	4.97057e-10	5.29501e-09
TYK2	338.693	1.2201	0.205	5.02253e-10	5.34264e-09
PPP1R12C	256.848	1.7239	0.2936	5.02683e-10	5.34336e-09
MMP13	32.204	2.4569	0.4201	5.06367e-10	5.37865e-09
MAN2B1	554.168	1.4624	0.248	5.14281e-10	5.44702e-09
POMT1	300.67	1.125	0.1885	5.184e-10	5.48671e-09
TRIM47	121.26	2.2739	0.392	5.22014e-10	5.51705e-09
CCL26	18.47	4.017	0.6801	5.26182e-10	5.55314e-09
YIF1B	525.403	1.7112	0.2925	5.33545e-10	5.6228e-09
RPS6KB2	278.923	1.6623	0.2839	5.39349e-10	5.67586e-09
ZNF358	38.066	2.1626	0.3718	5.4441e-10	5.72503e-09
TKT	4777.34	1.3847	0.2349	5.48419e-10	5.75898e-09
LLGL2	50.835	2.1198	0.3652	5.54703e-10	5.81669e-09
MAFG-DT	46.516	1.928	0.3307	5.64565e-10	5.90752e-09
ABCB8	216.871	2.0906	0.3605	5.74828e-10	6.00213e-09
HIRIP3	224.321	1.2259	0.2071	5.85112e-10	6.10519e-09
HDGFL2	259.481	1.4305	0.2436	6.08999e-10	6.33651e-09
MTLN	104.724	1.8799	0.3237	6.1392e-10	6.37871e-09
TMEM141	361.25	1.6549	0.2838	6.2027e-10	6.42659e-09
ZNF511	279.809	1.5433	0.264	6.34294e-10	6.55807e-09
MUTYH	101.477	1.3783	0.2345	6.35257e-10	6.56344e-09
HSF1	220.379	1.4622	0.2495	6.37544e-10	6.58246e-09
ATG4B	521.737	1.2679	0.2151	6.45416e-10	6.65441e-09
MYO1C	1394.62	1.3445	0.2286	6.59999e-10	6.78108e-09
SLC66A1	368.48	1.4064	0.2398	6.60603e-10	6.78256e-09
CHMP6	172.783	1.6684	0.2868	6.67706e-10	6.84596e-09
DGKD	556.347	1.2195	0.2065	6.70014e-10	6.86485e-09
PLEKHG4	57.046	1.8446	0.318	6.70823e-10	6.86837e-09
GET3	683.218	1.5483	0.2653	6.80436e-10	6.95714e-09
MYH9	7957.29	1.3171	0.2253	6.91944e-10	7.06991e-09
BCAR1	171.05	2.4577	0.4282	6.94583e-10	7.09195e-09
TNK2	66.629	2.2535	0.3916	7.01463e-10	7.14736e-09
MED16	55.546	2.8977	0.5066	7.05631e-10	7.18488e-09
TRPM2	54.448	3.0262	0.5296	7.14283e-10	7.26795e-09
HDAC11	145.485	1.4582	0.2497	7.24033e-10	7.35702e-09
LYPD1	120.779	1.8173	0.3143	7.26186e-10	7.37381e-09
REX1BD	84.703	2.7187	0.476	7.44795e-10	7.55757e-09
PRPF6	2184.6	1.0685	0.1805	7.56419e-10	7.67024e-09
NADK	704.365	1.2114	0.2059	7.7053e-10	7.79725e-09
STOML1	105.883	1.7323	0.2996	7.83937e-10	7.91663e-09
LOC105373854	35.205	2.7913	0.486	7.85042e-10	7.92237e-09
SLC25A39	826.603	1.3573	0.2319	7.94726e-10	8.01462e-09
ECHDC3	39.564	1.9865	0.3447	8.08e-10	8.14292e-09
ZMYND19	202.069	1.4735	0.2537	8.52472e-10	8.57938e-09
STX10	291.67	1.3764	0.2362	8.55566e-10	8.60333e-09
AKT1	1081.23	1.3662	0.2342	8.56018e-10	8.60333e-09
PCED1A	130.69	1.3595	0.2332	8.66792e-10	8.69977e-09
GALK1	49.138	2.8946	0.5102	8.81564e-10	8.83601e-09
SIVA1	139.026	2.6758	0.471	8.89192e-10	8.90036e-09
H2AC17	1791.73	1.5512	0.2682	8.93199e-10	8.93442e-09
ACP5	814.819	1.0543	0.1789	8.9706e-10	8.96695e-09
WRAP53	294.292	1.1037	0.1876	9.04071e-10	9.03092e-09
S100A2	75.747	2.2556	0.3956	9.13056e-10	9.10727e-09
TBCB	1194.33	1.1687	0.1994	9.20329e-10	9.16849e-09
DGKQ	91.382	1.862	0.3247	9.42495e-10	9.35772e-09
C1orf159	29.975	3.4009	0.6009	9.6747e-10	9.56706e-09
VWF	22.371	2.6156	0.4568	9.98565e-10	9.86133e-09
CHST1	14.746	3.262	0.5658	1.0072e-09	9.93993e-09
LEMD2	1131.36	1.0992	0.1876	1.00938e-09	9.95343e-09
IKBKE	251.83	1.7592	0.3066	1.0106e-09	9.95351e-09
NOC2L	1409.82	1.3535	0.2332	1.01293e-09	9.96984e-09
KRBA1	43.921	1.5842	0.2744	1.02554e-09	1.00805e-08
CACTIN	95.915	1.9605	0.3435	1.06282e-09	1.0433e-08
SH3GLB2	162.922	1.6351	0.2845	1.06755e-09	1.04656e-08
FCHSD1	110.223	1.4943	0.2591	1.09392e-09	1.07027e-08
PPP4C	814.512	1.5304	0.2657	1.09659e-09	1.07217e-08
DPP7	179.594	2.6349	0.4665	1.11218e-09	1.08669e-08
USP11	747.433	1.0664	0.1823	1.14906e-09	1.12199e-08
AP1M1	563.338	1.3676	0.2367	1.15324e-09	1.12532e-08
MAFK	72.626	2.0098	0.3535	1.1738e-09	1.14312e-08
BSG	1432.27	1.6732	0.2923	1.18814e-09	1.15403e-08
CSNK1G2	237.834	1.6177	0.2827	1.19117e-09	1.15621e-08
PRDX5	1796.78	1.4025	0.2434	1.19915e-09	1.1632e-08
SUV39H1	428.971	1.2097	0.2086	1.24313e-09	1.2027e-08
GNAI2	1583.24	1.205	0.2078	1.26445e-09	1.22252e-08
RNF166	114.693	1.5295	0.2669	1.27223e-09	1.22924e-08
ARRDC2	167.16	1.3671	0.2373	1.28629e-09	1.24201e-08
FAM131A	106.861	1.2305	0.2126	1.29446e-09	1.24908e-08
FAM214B	245.63	1.2828	0.2221	1.30914e-09	1.26242e-08
GLYCTK	76.225	1.7944	0.3156	1.35977e-09	1.30868e-08
CENPB	1195.79	1.5619	0.2738	1.37388e-09	1.3213e-08
CANT1	857.189	1.0669	0.1835	1.38028e-09	1.32497e-08
ATG9A	800.966	1.1845	0.2045	1.40512e-09	1.34706e-08
FPGS	295.129	1.5773	0.2766	1.4517e-09	1.3854e-08
IL1RAPL1	41.982	1.997	0.3524	1.48116e-09	1.41073e-08
CNTROB	645.474	1.3274	0.231	1.48489e-09	1.41251e-08
CD40	66.309	1.3657	0.2383	1.50869e-09	1.42962e-08
CPNE5	74.584	1.2243	0.2123	1.5215e-09	1.43991e-08
TMEM184B	806.953	1.1982	0.2076	1.53372e-09	1.45055e-08
RPL15P3	2082.64	1.1701	0.2026	1.54476e-09	1.46005e-08
MPG	153.451	2.4542	0.4382	1.54782e-09	1.46201e-08
COX6A1P2	1555.25	1.1318	0.1957	1.60274e-09	1.51098e-08
LOC102723591	106.451	1.759	0.3111	1.6285e-09	1.53232e-08
SIPA1	131.368	2.0899	0.3719	1.63111e-09	1.5338e-08
TAGLN2	3438.98	1.1375	0.1967	1.69358e-09	1.58951e-08
TSR3	206.346	1.6038	0.2827	1.69532e-09	1.59013e-08
ALYREF	1767.27	1.4013	0.2454	1.71183e-09	1.60408e-08
RPLP1	528.375	1.9318	0.3436	1.73773e-09	1.62681e-08
PGAP6	493.043	1.8487	0.3284	1.77768e-09	1.66105e-08
PACSIN3	248.845	1.6347	0.289	1.78188e-09	1.66392e-08
LMAN2	1664.52	1.463	0.2573	1.79484e-09	1.6739e-08
SPNS1	439.796	1.6711	0.2959	1.86057e-09	1.72973e-08
ABCD1	254.962	2.1413	0.3828	1.86019e-09	1.72973e-08
SLC39A3	147.099	1.5209	0.2684	1.86438e-09	1.73218e-08
RGCC	24.488	2.5434	0.4509	1.86863e-09	1.73504e-08
MYL6	18193.3	1.1917	0.2083	1.87654e-09	1.74129e-08
UBXN6	337.153	1.6361	0.2898	1.87882e-09	1.7423e-08
S100A6	12664.7	1.1966	0.2089	1.90896e-09	1.76803e-08
SEMA3B	481.39	1.5767	0.2788	1.91895e-09	1.77617e-08
SGTA	336.831	1.5514	0.2743	1.9312e-09	1.78527e-08
SDF4	982.183	1.75	0.311	1.96528e-09	1.8145e-08
PLEKHO1	343.545	1.1545	0.2012	1.96959e-09	1.81734e-08
TPI1P1	5068.89	1.128	0.1964	1.98415e-09	1.82964e-08
APOBEC3B	92.025	1.4686	0.2594	2.02167e-09	1.8619e-08
UNC45A	1314.35	1.468	0.2594	2.04229e-09	1.87855e-08
DMAC2	414.338	1.2468	0.2184	2.04788e-09	1.88252e-08
RPS6KA1	961.153	1.285	0.2256	2.05024e-09	1.88352e-08
CCS	115.416	1.9356	0.3465	2.14082e-09	1.95941e-08
SLC35C2	723.812	1.1238	0.196	2.14424e-09	1.96132e-08
CLCN7	442.354	1.8823	0.3365	2.15991e-09	1.97443e-08
GMEB2	188.237	1.1681	0.2045	2.16193e-09	1.97505e-08
ZGPAT	124.3	2.0439	0.3669	2.20352e-09	2.01056e-08
PIGQ	47.838	2.8796	0.5209	2.21922e-09	2.02363e-08
NTHL1	89.417	2.2581	0.4068	2.23312e-09	2.0338e-08
GPR108	284.638	1.5344	0.2728	2.30475e-09	2.09257e-08
AGFG2	230.147	1.2502	0.2199	2.31326e-09	2.09901e-08
CAPN1	689.606	1.5426	0.2742	2.34485e-09	2.12172e-08
MED27	247.784	1.3243	0.2338	2.35436e-09	2.12844e-08
MT2A	56.561	2.0507	0.3691	2.38698e-09	2.15266e-08
TMEM208	913.821	1.5173	0.2698	2.4346e-09	2.19426e-08
GRN	993.305	1.6756	0.2995	2.46476e-09	2.21738e-08
SCAF1	125.333	1.8358	0.3292	2.4924e-09	2.24088e-08
ARSL	257.847	1.1761	0.2068	2.49834e-09	2.24485e-08
OSBPL7	91.021	1.6285	0.2911	2.57401e-09	2.30303e-08
RMND5B	309.683	1.132	0.1988	2.57906e-09	2.30579e-08
DBNL	1753.75	1.2884	0.2277	2.6386e-09	2.35653e-08
TBC1D10A	233.437	1.6671	0.2985	2.64557e-09	2.36133e-08
ARFGAP1	683.091	1.65	0.2954	2.6597e-09	2.3725e-08
ELF4	72.798	1.3211	0.2336	2.67178e-09	2.37933e-08
IQSEC2	127.017	1.3098	0.2318	2.67263e-09	2.37933e-08
SH3GL1	354.602	1.9135	0.3447	2.67381e-09	2.37933e-08
PLXNB2	735.045	1.7379	0.3124	2.83805e-09	2.51487e-08
BOK	25.151	2.2923	0.4145	2.8729e-09	2.54423e-08
NSUN5	219.347	1.8024	0.325	2.89339e-09	2.55776e-08
GAP43	122.599	1.2398	0.2194	2.90286e-09	2.5646e-08
TMUB1	78.322	1.5423	0.276	2.94145e-09	2.59536e-08
TFAP4	127.843	1.185	0.2094	2.95621e-09	2.60393e-08
NAP1L2	18.879	3.9184	0.6894	2.95602e-09	2.60393e-08
WFS1	195.231	1.5029	0.2688	3.00066e-09	2.63836e-08
H2AC12	1897.29	1.9604	0.3549	3.01587e-09	2.64767e-08
GATA2	52.365	1.7203	0.3096	3.05254e-09	2.676e-08
SLC25A1	558.573	1.4114	0.252	3.09638e-09	2.71122e-08
TRABD	147.007	2.1586	0.3928	3.1591e-09	2.75795e-08
SEPTIN9	6417.1	1.1338	0.2001	3.17248e-09	2.76799e-08
NBEAL2	93.506	1.7871	0.3228	3.22591e-09	2.80797e-08
FBLIM1	343.044	1.4241	0.2547	3.2323e-09	2.81188e-08
BANP	141.248	1.0847	0.1913	3.25632e-09	2.8311e-08
RNASEH2A	568.991	1.3724	0.2452	3.26235e-09	2.83467e-08
NINJ1	145.341	1.9826	0.3599	3.2946e-09	2.86101e-08
PKN1	619.337	1.6917	0.3053	3.31714e-09	2.87889e-08
PLP2	430.288	1.0291	0.1812	3.34364e-09	2.90018e-08
AQP3	21.95	3.3706	0.6114	3.35143e-09	2.90523e-08
PHC2	2330.4	1.0118	0.1789	3.4233e-09	2.96579e-08
WRAP73	226.898	1.104	0.1953	3.45037e-09	2.98574e-08
ARL4D	121.443	1.4201	0.2546	3.46578e-09	2.99731e-08
HS6ST1	170.562	1.3124	0.2346	3.53826e-09	3.0582e-08
MGAT4B	998.959	1.2925	0.2306	3.55286e-09	3.06723e-08
COQ8B	189.522	1.6813	0.3041	3.56127e-09	3.07269e-08
PANX2	16.456	2.9843	0.543	3.65741e-09	3.1506e-08
NR1H2	298.151	2.2628	0.4144	3.65798e-09	3.1506e-08
ADA	301.216	1.0946	0.194	3.69549e-09	3.18106e-08
MAD1L1	334.072	1.5399	0.2776	3.70224e-09	3.185e-08
XKR8	267.478	1.0075	0.1779	3.76523e-09	3.23165e-08
PARP10	31.323	2.6205	0.4815	3.76863e-09	3.2327e-08
EMP3	2083.14	1.2296	0.2194	3.81339e-09	3.26729e-08
TMEM9	1322.56	1.2098	0.2158	3.85608e-09	3.29812e-08
GTF3C5	742.069	1.3885	0.2497	3.96463e-09	3.38508e-08
ORAI1	108.635	2.3715	0.4359	3.97724e-09	3.39192e-08
ARMC6	319.93	1.7728	0.3224	3.99487e-09	3.40498e-08
AMDHD2	80.288	2.4572	0.4522	3.99859e-09	3.40619e-08
NIBAN2	1514.39	1.7404	0.3163	4.03449e-09	3.4328e-08
H4C8	2735.37	1.6548	0.3002	4.05223e-09	3.44393e-08
ARHGEF16	47.61	2.2118	0.406	4.05623e-09	3.44535e-08
KCNN4	124.996	1.9066	0.3482	4.06294e-09	3.44906e-08
PRMT1	1547.23	1.452	0.2625	4.10464e-09	3.48245e-08
DBF4B	348.679	1.0315	0.1827	4.12234e-09	3.49546e-08
CADM3	62.766	1.4007	0.2522	4.23603e-09	3.58568e-08
LOC105374811	25.431	2.9621	0.5398	4.27011e-09	3.61245e-08
MIEF2	100.358	1.5872	0.2882	4.36492e-09	3.68632e-08
SMOX	174.005	1.8525	0.3385	4.37372e-09	3.69164e-08
GMPPA	778.993	1.3092	0.2352	4.42399e-09	3.72767e-08
ITM2C	2970.16	1.0597	0.1883	4.52703e-09	3.80797e-08
BATF2	211.712	1.0365	0.1843	4.53013e-09	3.80841e-08
H1-5	6806.75	1.6956	0.3091	4.54339e-09	3.81738e-08
CDH24	46.393	1.7539	0.3195	4.54643e-09	3.81776e-08
MTFP1	1018.34	1.3203	0.2379	4.59671e-09	3.85559e-08
MRPS28	207.843	1.4996	0.2723	4.73721e-09	3.96217e-08
TRMT112P6	89.939	1.4374	0.2605	4.83578e-09	4.04233e-08
D2HGDH	89.364	1.6484	0.3009	4.90187e-09	4.09526e-08
CCDC12	273.009	1.1815	0.2123	5.08274e-09	4.22959e-08
HTATSF1P2	282.248	1.0476	0.1867	5.11971e-09	4.25796e-08
SPATA33	82.178	1.2507	0.2255	5.24735e-09	4.3592e-08
FHOD1	308.619	1.163	0.2089	5.2728e-09	4.37788e-08
BCR	363.974	1.0609	0.1898	5.29662e-09	4.39518e-08
OTUB1	585.256	1.1747	0.2114	5.34482e-09	4.43268e-08
PLPP2	62.283	2.2851	0.4238	5.35654e-09	4.43991e-08
H2BC13	730.586	1.8549	0.3413	5.36998e-09	4.44606e-08
DDX54	674.858	1.5218	0.2777	5.47271e-09	4.52096e-08
ACOT8	97.521	1.7152	0.3153	5.68938e-09	4.68422e-08
TLE5	992.86	1.1709	0.2107	5.71238e-09	4.70053e-08
LOC105375999	47.711	1.5204	0.2771	5.72526e-09	4.7085e-08
DNPH1	391.165	1.4518	0.2649	5.78844e-09	4.75781e-08
TAOK2	697.988	1.0997	0.1977	5.82635e-09	4.7863e-08
ADCY7	117.734	1.5738	0.288	5.84573e-09	4.79688e-08
SLC7A5	3551.84	1.3685	0.2481	5.93882e-09	4.87055e-08
TXNRD2	172.091	1.2641	0.2292	6.05903e-09	4.95812e-08
POLRMT	43.037	2.2939	0.4276	6.22342e-09	5.087e-08
EPHB4	528.28	1.2292	0.2228	6.28526e-09	5.1347e-08
TMC6	1090.35	1.462	0.2676	6.40265e-09	5.22193e-08
PPP1R37	139.184	1.7087	0.3153	6.47349e-09	5.27679e-08
BRF1	186.502	1.7576	0.3249	6.49459e-09	5.28815e-08
KLC2	66.224	1.9181	0.3553	6.53364e-09	5.31408e-08
L1CAM	605.648	1.4094	0.2577	6.59243e-09	5.35894e-08
TSSC4	147.443	2.1511	0.4005	6.61997e-09	5.37836e-08
ADAMTS4	578.644	1.1177	0.2019	6.78649e-09	5.49549e-08
THEMIS2	52.646	1.4464	0.2648	6.80378e-09	5.50516e-08
POLR2E	515.642	1.7992	0.3333	6.83492e-09	5.52561e-08
NEURL4	318.923	1.4794	0.2717	6.84245e-09	5.52867e-08
VPS51	128.44	1.9675	0.3666	7.16631e-09	5.77769e-08
H4C2	1485.46	1.8573	0.3451	7.28352e-09	5.86578e-08
ECI1	235.353	1.5478	0.2856	7.34943e-09	5.9124e-08
COL6A1	299.036	1.7965	0.3337	7.3837e-09	5.93673e-08
ACVRL1	51.402	1.343	0.2454	7.41168e-09	5.95599e-08
POLR2J	187.082	1.7836	0.3313	7.44014e-09	5.97235e-08
CIAO2B	783.069	1.3653	0.2503	7.53422e-09	6.0413e-08
TELO2	93.959	2.7278	0.515	7.53221e-09	6.0413e-08
ZNF787	291.055	1.6075	0.2972	7.58151e-09	6.07592e-08
FAM50A	887.05	1.3711	0.2518	7.81152e-09	6.25006e-08
IL1B	53.157	2.1609	0.4055	7.85811e-09	6.27713e-08
ARL6IP4	1522.04	1.3759	0.2527	7.96554e-09	6.35606e-08
TEDC1	39.558	3.6088	0.6856	7.97016e-09	6.35631e-08
CCDC9B	179.267	1.0003	0.1806	8.04129e-09	6.40611e-08
GAPDHP65	1013.32	1.3249	0.2429	8.0768e-09	6.43093e-08
MRPL55	242.33	1.7011	0.3163	8.10089e-09	6.44315e-08
PTPRS	820.599	1.167	0.2127	8.11156e-09	6.44817e-08
FAAP100	97.59	2.1423	0.4024	8.24613e-09	6.55161e-08
FIS1	1334.02	1.5852	0.2942	8.45627e-09	6.71134e-08
CPSF1	136.237	1.76	0.328	8.49582e-09	6.7391e-08
MYG1-AS1	90.573	1.3991	0.2581	8.51985e-09	6.75453e-08
PKN3	59.012	2.2185	0.4178	8.82151e-09	6.97495e-08
COMT	1028.91	1.6754	0.312	8.95036e-09	7.07304e-08
ZNF860	100.198	1.1384	0.2077	9.02226e-09	7.12604e-08
ATP13A2	276.88	1.7883	0.3345	9.10259e-09	7.17796e-08
TPI1	12915.6	1.0351	0.1881	9.15806e-09	7.21399e-08
SAC3D1	81.737	2.1452	0.4048	9.31253e-09	7.32785e-08
NUDT18	51.289	2.0048	0.3769	9.32196e-09	7.33135e-08
CST3	856.062	1.2088	0.2218	9.48586e-09	7.44042e-08
EXOSC4	117.738	1.8011	0.3377	9.55049e-09	7.4795e-08
SLC35E4	115.994	1.6722	0.3123	9.55089e-09	7.4795e-08
AP1S1	2599.52	1.1067	0.2023	9.64834e-09	7.55181e-08
NCKIPSD	143.678	1.3932	0.2578	9.70637e-09	7.5932e-08
RRAS	37.656	2.4097	0.4562	9.75164e-09	7.62457e-08
ACTN4	4924.58	1.2686	0.2346	9.76485e-09	7.63086e-08
HRCT1	17.643	2.7864	0.5248	1.00739e-08	7.84743e-08
SNX8	346.777	1.4979	0.279	1.03082e-08	8.01726e-08
CPNE2	474.164	1.0121	0.1844	1.05025e-08	8.15976e-08
NLRX1	92.244	1.5241	0.2841	1.05482e-08	8.19092e-08
H2AC13	1577.12	1.9187	0.362	1.05984e-08	8.22558e-08
GNB2	796.02	1.6255	0.3044	1.06903e-08	8.28819e-08
IGFBP2	980.382	1.5868	0.2963	1.07038e-08	8.29429e-08
POLR2I	243.327	1.3266	0.2458	1.07953e-08	8.35207e-08
ZNF574	177.236	1.5597	0.2917	1.10684e-08	8.5454e-08
CLN3	331.432	1.4359	0.2676	1.12648e-08	8.67433e-08
RUSF1	402.984	1.3796	0.2568	1.15515e-08	8.88125e-08
CCM2	288.892	1.3654	0.2539	1.16262e-08	8.92939e-08
COMETT	45.646	2.2713	0.4312	1.1799e-08	9.04797e-08
PNKD	464.399	1.4088	0.2626	1.18155e-08	9.05115e-08
HPS6	271.159	1.5066	0.2822	1.18619e-08	9.08198e-08
RNF187	1642.57	1.1439	0.211	1.20466e-08	9.21864e-08
C8orf82	107.279	1.5768	0.2964	1.24585e-08	9.50357e-08
TRIP6	772.706	1.3244	0.2467	1.2602e-08	9.60385e-08
NLE1	381.291	1.1045	0.2037	1.27552e-08	9.7055e-08
TBC1D9B	896.696	1.0292	0.1891	1.28955e-08	9.8022e-08
FURIN	447.016	1.6384	0.3089	1.28955e-08	9.8022e-08
UAP1L1	328.401	1.1727	0.2172	1.31265e-08	9.96235e-08
NDOR1	73.645	2.0889	0.3981	1.31383e-08	9.96616e-08
TOM1	347.941	1.9863	0.3781	1.31474e-08	9.96797e-08
RPL8	2689.81	1.3671	0.2562	1.33509e-08	1.01015e-07
TRIB3	825.528	1.0189	0.1873	1.33662e-08	1.01079e-07
SHISA4	319.978	1.2197	0.2267	1.35895e-08	1.02505e-07
CFAP45	25.661	2.167	0.4123	1.36142e-08	1.02638e-07
POLD1	196.977	2.3524	0.4513	1.36394e-08	1.02776e-07
KIAA2013	771.162	1.1474	0.2126	1.37785e-08	1.03718e-07
RTN2	41.656	1.9863	0.3787	1.39655e-08	1.05019e-07
FDX2	143.652	1.9774	0.3772	1.40108e-08	1.05252e-07
KIF22	923.228	1.0598	0.1954	1.45854e-08	1.09204e-07
PLTP	179.635	1.0162	0.1874	1.45886e-08	1.09204e-07
C8orf58	29.579	2.2212	0.4249	1.46635e-08	1.09708e-07
SLAMF9	169.528	1.6229	0.3075	1.49244e-08	1.11604e-07
MRPL38	388.504	1.8221	0.3475	1.5467e-08	1.15486e-07
TMEM250	267.196	1.5816	0.3001	1.56737e-08	1.16793e-07
ST6GALNAC4	69.72	2.0702	0.3971	1.57557e-08	1.17344e-07
BBC3	39.816	1.773	0.3378	1.59086e-08	1.18244e-07
NUDT1	333.679	1.7603	0.336	1.65704e-08	1.22576e-07
NFATC4	82.825	1.2671	0.2377	1.68217e-08	1.24342e-07
CD68	1356.05	1.2212	0.2288	1.7143e-08	1.26359e-07
SHISA5	731.259	1.1373	0.2122	1.71459e-08	1.26359e-07
MTG2	306.342	1.136	0.212	1.7313e-08	1.27527e-07
MFGE8	680.934	1.2734	0.2392	1.74243e-08	1.28157e-07
MMP12	24.674	2.4264	0.466	1.7443e-08	1.28228e-07
TMIGD3	111.486	1.0378	0.1928	1.77813e-08	1.30585e-07
SSR4	1400.22	1.3411	0.2531	1.79641e-08	1.31796e-07
ZBTB7B	302.315	1.7646	0.3378	1.7977e-08	1.31826e-07
PIH1D1	748.131	1.231	0.2312	1.80971e-08	1.32574e-07
LIN37	70.44	1.6156	0.308	1.83316e-08	1.34225e-07
TNIP2	258.356	1.4514	0.2752	1.8397e-08	1.34638e-07
CD2BP2	2009.58	1.059	0.1969	1.85058e-08	1.35366e-07
CARHSP1	914.217	1.1793	0.2208	1.8518e-08	1.35389e-07
NR2C2AP	227.292	1.077	0.2008	1.86072e-08	1.35974e-07
MUC5B	23.901	3.9929	0.7772	1.87252e-08	1.36768e-07
MAP2K2	340.11	1.7808	0.3415	1.8748e-08	1.36867e-07
DPP3	982.75	1.1557	0.2165	1.88449e-08	1.37438e-07
ASB6	357.606	1.0937	0.2043	1.8942e-08	1.38078e-07
TRA	79.929	1.2628	0.2378	1.91103e-08	1.39236e-07
ZDHHC12	54.642	2.4589	0.4783	1.96209e-08	1.42816e-07
ATG4D	97.014	2.0128	0.3889	1.97297e-08	1.43537e-07
BBOX1-AS1	22.036	3.5684	0.6829	2.01951e-08	1.46705e-07
CYB561D2	295.21	1.4695	0.2801	2.04062e-08	1.4802e-07
PPCDC	259.424	1.2737	0.2407	2.06229e-08	1.49445e-07
TIMP1	1531	1.3502	0.2561	2.07047e-08	1.49964e-07
HCFC1R1	178.087	1.335	0.2531	2.09931e-08	1.51904e-07
CHCHD5	66.057	2.4104	0.4702	2.10623e-08	1.52255e-07
H3-5	276.002	1.4887	0.2842	2.12873e-08	1.53807e-07
ERI3	974.996	1.0473	0.1961	2.1825e-08	1.57384e-07
NOC2LP1	94.379	1.4672	0.2804	2.18611e-08	1.57567e-07
PKD1	84.481	2.046	0.397	2.19343e-08	1.58017e-07
AXIN1	448.009	1.2023	0.227	2.23025e-08	1.60513e-07
JAKMIP3	17.034	5.7291	1.0195	2.23186e-08	1.6055e-07
MTX1	236.917	1.2865	0.2439	2.23397e-08	1.60624e-07
MBD3	159.496	2.3264	0.4542	2.24371e-08	1.61167e-07
PLOD1	3255.07	1.0955	0.2058	2.24988e-08	1.61531e-07
PSMB10	197.477	1.4553	0.2783	2.26974e-08	1.62878e-07
PPIL2	787.815	1.0019	0.1868	2.27784e-08	1.6338e-07
LGALS3BP	2535.73	1.1216	0.211	2.28823e-08	1.64045e-07
TRPM4	54.93	1.7998	0.3476	2.29024e-08	1.6411e-07
ITGA3	422.656	1.475	0.2823	2.32543e-08	1.6647e-07
SLC38A10	621.314	1.7643	0.341	2.35994e-08	1.68776e-07
SERF2	4693.01	1.5737	0.3022	2.36302e-08	1.68915e-07
MICOS13	154.114	2.2034	0.4307	2.39953e-08	1.7111e-07
PLD3	436.572	1.5369	0.2949	2.40518e-08	1.7143e-07
TECR	213.351	1.3474	0.2571	2.46187e-08	1.75217e-07
SH3D21	21.739	2.5125	0.4903	2.48125e-08	1.76511e-07
MCRS1	1070.88	1.3472	0.2573	2.48952e-08	1.76929e-07
RPL36	1124.2	1.7358	0.3348	2.50503e-08	1.77945e-07
LRPAP1	1543.79	1.1819	0.2238	2.53011e-08	1.79641e-07
DEXI	37.6	2.2196	0.4337	2.55648e-08	1.81338e-07
TRMT61A	142.249	2.1081	0.4124	2.62238e-08	1.85656e-07
FBXW5	168.09	2.2899	0.4493	2.64329e-08	1.87046e-07
FKRP	224.274	1.2456	0.2375	2.73247e-08	1.92525e-07
TCIRG1	78.22	1.9179	0.3741	2.74949e-08	1.93633e-07
COL4A2	7028.27	1.2156	0.2305	2.76807e-08	1.94662e-07
PPP1CA	1459.91	1.025	0.1932	2.77258e-08	1.94886e-07
ALKBH2	365.622	1.0136	0.191	2.82952e-08	1.98416e-07
H2AC15	120.473	2.5719	0.5091	2.90312e-08	2.03094e-07
LOC100996842	87.166	1.3906	0.2675	2.95851e-08	2.06382e-07
ADGRG1	460.654	1.7139	0.3334	2.99024e-08	2.08497e-07
SLC16A5	20.377	2.1986	0.4295	3.01718e-08	2.10276e-07
TMEM175	35.383	1.9078	0.3724	3.04209e-08	2.11771e-07
CDPF1	179.905	1.0611	0.2014	3.17475e-08	2.20353e-07
PINK1	154.38	1.5582	0.3025	3.18031e-08	2.20396e-07
RRNAD1	137.133	1.2235	0.2344	3.2095e-08	2.2221e-07
PPP1R9B	408.006	1.1665	0.2229	3.21593e-08	2.22551e-07
FBXW4	86.627	1.0313	0.1956	3.22913e-08	2.23359e-07
H2BC15	721.48	1.4729	0.2852	3.32646e-08	2.29661e-07
RTL9	74.43	1.3743	0.2648	3.34155e-08	2.30595e-07
CRAT	71.429	1.4504	0.2806	3.35893e-08	2.31578e-07
TAB1	305.526	1.1642	0.2227	3.37772e-08	2.32656e-07
TBRG4	1739.67	1.3178	0.2543	3.4994e-08	2.40364e-07
LRRC41	1019.03	1.0002	0.1897	3.52601e-08	2.41985e-07
AKT2	921.285	1.2596	0.2425	3.5288e-08	2.42045e-07
SLC22A17	52.478	1.5213	0.2959	3.54799e-08	2.43249e-07
RBM42	344.681	1.9159	0.3775	3.55406e-08	2.43551e-07
NOC2LP2	57.219	1.9614	0.387	3.59088e-08	2.4596e-07
MRPL53	425.837	1.3603	0.2635	3.65027e-08	2.49565e-07
GJD3	42.474	1.8973	0.3739	3.68367e-08	2.51643e-07
PTGES2	366.585	1.5568	0.3038	3.68408e-08	2.51643e-07
CIDECP1	62.015	1.266	0.244	3.70387e-08	2.52878e-07
ILVBL	289.039	1.2094	0.2327	3.7286e-08	2.54298e-07
ZNF771	66.121	1.7089	0.3357	3.84445e-08	2.61146e-07
MRPL12	354.04	1.2085	0.2328	3.84998e-08	2.61281e-07
EVA1C	34.399	2.0071	0.3958	3.84922e-08	2.61281e-07
TAF6L	131.746	1.1093	0.2127	3.89871e-08	2.64345e-07
RABL6	544.414	1.1788	0.2268	3.90622e-08	2.64733e-07
ALDOA	810.298	2.8405	0.5711	3.91409e-08	2.65144e-07
DYNLRB1	813.106	1.1054	0.2119	3.93078e-08	2.66153e-07
PIAS4	111.151	1.4938	0.2915	3.94211e-08	2.66798e-07
BMP1	271.502	1.2363	0.2387	4.00067e-08	2.70637e-07
RPS15	706.936	1.7259	0.3401	4.06778e-08	2.74547e-07
TNKS1BP1	332.032	1.2637	0.2446	4.07934e-08	2.75101e-07
LOXL2	96.454	1.2173	0.2349	4.11407e-08	2.77164e-07
RRP7A	854.588	1.1261	0.2166	4.15652e-08	2.79769e-07
LINC01992	71.171	1.4208	0.2765	4.1648e-08	2.80198e-07
PLOD3	3536.53	1.3678	0.2664	4.20162e-08	2.82418e-07
PWWP2B	42.703	1.9353	0.3836	4.20608e-08	2.82589e-07
LRWD1	195.463	1.8058	0.3574	4.32647e-08	2.90017e-07
CPTP	92.39	1.8102	0.3587	4.47204e-08	2.99367e-07
HIP1R	206.085	1.1971	0.2319	4.49906e-08	3.00903e-07
PLEC	752.197	2.5044	0.505	4.50143e-08	3.00925e-07
SCYL1	351.159	1.7451	0.3456	4.56694e-08	3.05166e-07
ARF5	909.93	1.0502	0.2019	4.61047e-08	3.07458e-07
RPS19BP1	1258.42	1.4906	0.2904	4.61165e-08	3.07458e-07
MAD2L2	473.508	1.2673	0.2465	4.61074e-08	3.07458e-07
MAF1	529.693	1.1211	0.2163	4.60889e-08	3.07458e-07
NUCB1	1386.17	1.2502	0.2432	4.80186e-08	3.18985e-07
DAPK2	60.232	1.8426	0.3666	4.88155e-08	3.23987e-07
DTYMK	880.954	1.0327	0.1988	4.91639e-08	3.25567e-07
MZT2B	205.731	1.9526	0.3904	5.00352e-08	3.31188e-07
PPP6R1	726.731	1.3442	0.2632	5.04484e-08	3.33774e-07
UCKL1	151.827	1.4261	0.2805	5.05957e-08	3.34554e-07
CYP19A1	36.336	2.2426	0.4479	5.06343e-08	3.34554e-07
LOC407835	164.528	1.4205	0.2792	5.08217e-08	3.35641e-07
LLGL1	259.587	1.8491	0.3688	5.13594e-08	3.38738e-07
RNF31	384.567	1.4976	0.2954	5.17667e-08	3.41272e-07
FOXD1	115.454	1.0443	0.2016	5.18432e-08	3.41624e-07
NDUFA11	829.327	2.5233	0.5114	5.19054e-08	3.41751e-07
EIF6	3008.2	1.3096	0.2578	5.19089e-08	3.41751e-07
RNF215	236.747	1.2729	0.249	5.31371e-08	3.49525e-07
CD81	866.296	1.2658	0.2475	5.36716e-08	3.52569e-07
AP1B1	1957.81	1.2405	0.2421	5.38644e-08	3.53679e-07
DDX11	350.984	1.1203	0.2175	5.39271e-08	3.53932e-07
ZNF205	48.594	2.2101	0.4454	5.45937e-08	3.5783e-07
SPATA20	341.985	1.3385	0.2629	5.46496e-08	3.58037e-07
BCKDHA	173.508	1.7092	0.3406	5.56768e-08	3.63854e-07
TUBAP2	541.937	1.1513	0.224	5.66291e-08	3.69856e-07
CCDC57	263.028	1.2494	0.2446	5.6904e-08	3.71488e-07
CORO1B	264.061	1.9433	0.3901	5.71856e-08	3.73161e-07
PELI3	85.88	1.6066	0.3196	5.72319e-08	3.73298e-07
ARRDC1-AS1	80.721	1.2266	0.24	5.82287e-08	3.79129e-07
CYC1	1317.57	1.401	0.277	5.87522e-08	3.82369e-07
KLHDC4	191.929	1.0555	0.2048	5.95697e-08	3.87347e-07
MLF2	1770.68	1.0511	0.2037	6.07122e-08	3.94429e-07
GRHPR	714.118	1.0535	0.2049	6.21321e-08	4.02944e-07
CSRP1	6803.6	1.0272	0.1987	6.24696e-08	4.04955e-07
AMBP	14.478	4.9461	0.9445	6.27487e-08	4.06585e-07
SIRT2	1147.64	1.1105	0.2167	6.32742e-08	4.0981e-07
TGM2	142.935	1.4202	0.2815	6.43218e-08	4.15899e-07
WDR45	322.93	1.1206	0.2187	6.43271e-08	4.15899e-07
IL1R1	88.346	1.4268	0.2826	6.43813e-08	4.16067e-07
KLHDC8B	290.576	1.0162	0.1974	6.51467e-08	4.20829e-07
APBB1	323.895	1.1977	0.2353	6.68226e-08	4.31278e-07
PAFAH1B3	213.517	1.7298	0.3475	6.70011e-08	4.32241e-07
HSPBP1	378.942	1.8146	0.366	6.87004e-08	4.42429e-07
LINC00942	16.175	4.8576	0.9376	6.91488e-08	4.45123e-07
RFNG	77.176	1.6941	0.3404	6.94642e-08	4.46958e-07
USF2	645.77	1.1065	0.2165	6.99331e-08	4.49779e-07
LRP3	75.114	2.6073	0.5343	7.0497e-08	4.53181e-07
RPUSD1	75.445	2.5078	0.5141	7.23046e-08	4.64222e-07
INTS11	400.612	1.405	0.2796	7.31397e-08	4.69379e-07
HROB	184.086	1.4862	0.2969	7.32999e-08	4.70203e-07
SLC25A11	1647.47	1.1037	0.2163	7.34749e-08	4.71121e-07
RAC3	48.267	2.1898	0.4462	7.42785e-08	4.75859e-07
RGS4	18.673	2.5119	0.5033	7.46708e-08	4.77958e-07
GPR137	68.974	1.8989	0.3851	7.56784e-08	4.83778e-07
LINC02535	52.663	1.8374	0.3714	7.60363e-08	4.85855e-07
SUN2	1000.07	1.4887	0.2979	7.7528e-08	4.94103e-07
GDF15	1673.91	1.2487	0.2467	7.77602e-08	4.95369e-07
CIAO3	184.623	1.7401	0.3521	8.0627e-08	5.12084e-07
TOR2A	41.522	1.5665	0.3149	8.0814e-08	5.13041e-07
CUEDC1	408.629	1.2516	0.2484	8.12495e-08	5.14929e-07
DAGLB	228.832	1.1235	0.2214	8.12296e-08	5.14929e-07
RHOT2	312.73	1.6767	0.3388	8.12159e-08	5.14929e-07
NADSYN1	329.546	1.353	0.27	8.23337e-08	5.21129e-07
CHPF	437.752	1.5748	0.3173	8.26475e-08	5.22891e-07
SH2B1	303.431	1.4127	0.2827	8.32936e-08	5.26527e-07
ZNF646	312.721	1.1703	0.2315	8.34269e-08	5.27144e-07
MRPL14	1186.43	1.1935	0.2356	8.35116e-08	5.27453e-07
CFAP410	107.924	1.1964	0.2371	8.37355e-08	5.28414e-07
H2BC11	2340.92	1.6611	0.3371	8.44382e-08	5.32621e-07
NDUFV1	750.095	1.3201	0.2636	8.664e-08	5.46043e-07
CCNQ	278.231	1.0391	0.2045	8.66957e-08	5.46161e-07
ATP6V0D1	1468.43	1.2638	0.252	8.79333e-08	5.53249e-07
KLHL22	606.052	1.0375	0.2038	8.81123e-08	5.54139e-07
MAN2C1	238.251	1.5022	0.3028	8.92905e-08	5.60831e-07
NAT9	478.556	1.095	0.2163	8.98284e-08	5.63969e-07
PYCARD	62.574	1.4015	0.2813	9.01285e-08	5.65613e-07
SHB	300.236	1.0333	0.2035	9.19194e-08	5.76361e-07
ALDH3B1	52.046	1.6939	0.344	9.24348e-08	5.79347e-07
SLMO2-ATP5E	94.058	1.4831	0.2993	9.29193e-08	5.82137e-07
ENO3	98.247	1.5256	0.3084	9.45945e-08	5.91126e-07
ZFYVE19	215.914	1.1601	0.2307	9.68325e-08	6.03322e-07
GTF2F1	873.703	1.1192	0.222	9.76513e-08	6.0791e-07
PPP1R14B	214.596	1.549	0.314	9.85721e-08	6.13384e-07
EHD1	263.784	1.4242	0.2874	9.86253e-08	6.13456e-07
AGPAT2	68.605	2.1753	0.449	9.88858e-08	6.14817e-07
TUBGCP6	300.423	1.3944	0.281	1.00428e-07	6.23095e-07
ALDH16A1	165.534	1.6298	0.332	1.01325e-07	6.28128e-07
PRR5L	42.169	1.7838	0.3653	1.02496e-07	6.34856e-07
COX5B	1859.37	1.1059	0.2196	1.02927e-07	6.3726e-07
BAX	592.702	1.3212	0.2662	1.10046e-07	6.78486e-07
SLC12A9	208.689	1.563	0.3184	1.10766e-07	6.81784e-07
H2AC14	1164.48	1.6886	0.3446	1.12373e-07	6.9024e-07
FAM89B	80.993	1.862	0.3836	1.12915e-07	6.9299e-07
C2CD4D-AS1	49.174	1.736	0.3556	1.15184e-07	7.05744e-07
AP5Z1	164.525	2.0122	0.4167	1.15617e-07	7.07803e-07
H3C6	552.834	1.1109	0.2217	1.15883e-07	7.09141e-07
NOC4L	72.108	1.9293	0.3986	1.17219e-07	7.16722e-07
CCDC159	54.173	1.69	0.3464	1.19736e-07	7.31203e-07
CEP170B	114.715	1.7713	0.3647	1.19877e-07	7.3153e-07
SHROOM1	72.296	1.1509	0.2304	1.19889e-07	7.3153e-07
INTS1	435.907	1.9193	0.397	1.20646e-07	7.35846e-07
LINC02806	21.731	2.3662	0.4903	1.21033e-07	7.37901e-07
H1-2	6569.55	1.2953	0.261	1.21752e-07	7.41976e-07
DUS1L	282.29	1.4662	0.2988	1.23509e-07	7.52064e-07
ABHD11	177.69	1.26	0.2544	1.24221e-07	7.56087e-07
CAPN15	146.915	1.3314	0.2699	1.2599e-07	7.6591e-07
UQCC3	101.767	1.7562	0.3626	1.28038e-07	7.77399e-07
PEX16	90.433	2.1755	0.454	1.28195e-07	7.78032e-07
LOXL1	83.502	1.5609	0.3196	1.28259e-07	7.78099e-07
LRCH4	42.863	1.9071	0.3952	1.30504e-07	7.91246e-07
H4C5	4309	1.451	0.2962	1.31322e-07	7.95696e-07
ACAP3	141.753	1.8793	0.3897	1.32003e-07	7.99235e-07
TFEC	34.049	2.0284	0.4189	1.32014e-07	7.99235e-07
MOB2	142.725	1.5598	0.3201	1.32121e-07	7.99552e-07
CTU2	109.867	2.0242	0.4217	1.32236e-07	7.99923e-07
EIF4EBP1	655.127	1.5384	0.3154	1.32847e-07	8.03286e-07
BCAT2	161.554	1.6655	0.3433	1.33511e-07	8.06974e-07
MRPL41	152.451	1.9635	0.4086	1.33735e-07	8.07998e-07
TYMP	21.439	2.3482	0.4892	1.33975e-07	8.09114e-07
GPAA1	287.422	2.0232	0.422	1.37083e-07	8.26872e-07
CCDC167	908.62	1.2728	0.258	1.37067e-07	8.26872e-07
FARSA	593.006	1.4307	0.2923	1.37169e-07	8.2705e-07
SCAP	670.931	1.1072	0.2222	1.38157e-07	8.32665e-07
TMEM11	400.74	1.0889	0.2188	1.4332e-07	8.60969e-07
TRIM11	277.778	1.2482	0.2531	1.45483e-07	8.71478e-07
BIRC7	49.635	1.8719	0.3899	1.46268e-07	8.7583e-07
AAMP	1882.63	1.019	0.2037	1.47374e-07	8.81731e-07
KCNAB2	496.58	1.1445	0.2312	1.4901e-07	8.90801e-07
B9D1	221.435	1.4464	0.2968	1.49485e-07	8.92192e-07
PLEKHG3	477.944	1.0345	0.2077	1.53516e-07	9.14402e-07
C12orf57	417.066	2.5826	0.5474	1.54156e-07	9.17842e-07
RPP25L	178.202	1.2266	0.2495	1.54911e-07	9.21593e-07
SLC51B	17.588	2.7865	0.5814	1.61185e-07	9.5622e-07
UBE2M	731.364	2.2538	0.4767	1.61988e-07	9.60598e-07
PIN1	401.713	1.6585	0.3446	1.64759e-07	9.76244e-07
PEMT	148.817	1.648	0.3425	1.65851e-07	9.82324e-07
SNRPB	3484.33	1.1676	0.2376	1.68749e-07	9.97886e-07
CD320	280.874	1.8275	0.3825	1.69204e-07	9.99773e-07
DDX49	352.912	1.4907	0.3086	1.73411e-07	1.02095e-06
PLEKHJ1	206.172	1.238	0.253	1.73637e-07	1.02187e-06
TNS2	228.279	1.2433	0.2541	1.74813e-07	1.02798e-06
STARD10	52.53	1.2882	0.2639	1.74765e-07	1.02798e-06
MOV10	204.082	1.1405	0.2317	1.752e-07	1.02984e-06
SPOUT1	350.03	1.2583	0.2577	1.77385e-07	1.04144e-06
PSENEN	1030.62	1.2551	0.2568	1.79097e-07	1.05024e-06
MRPL4	190.188	1.709	0.3571	1.79465e-07	1.05186e-06
HAUS7	233.112	1.4703	0.3047	1.82068e-07	1.06428e-06
CAVIN3	358.98	1.001	0.2019	1.82066e-07	1.06428e-06
RHBDD3	641.206	1.2692	0.2603	1.8202e-07	1.06428e-06
LOC107986852	40.868	1.7343	0.3626	1.86865e-07	1.08843e-06
PHLDA3	1693.03	1.1813	0.2413	1.86964e-07	1.08858e-06
METRN	312.267	1.5659	0.3261	1.88506e-07	1.0954e-06
THAP4	415.385	1.4665	0.3045	1.91378e-07	1.11078e-06
MRPS34	814.941	1.3188	0.2718	1.93469e-07	1.12247e-06
H2AC6	1094.91	1.6122	0.3371	1.96901e-07	1.13925e-06
SLC25A22	40.107	2.0728	0.4385	1.97301e-07	1.14111e-06
TSC2	380.625	1.1901	0.2433	1.98217e-07	1.14506e-06
NTMT1	174.056	1.3812	0.2858	1.98082e-07	1.14506e-06
NR2F6	223.318	1.5431	0.322	2.00317e-07	1.15629e-06
MAP1B	4681.93	1.258	0.259	2.03934e-07	1.17625e-06
IGHMBP2	125.501	1.3489	0.2791	2.05299e-07	1.18366e-06
GATD1	325.757	1.3022	0.2692	2.11526e-07	1.21813e-06
BRMS1	715.664	1.2382	0.2555	2.20661e-07	1.26777e-06
COMMD4	831.47	1.2226	0.2524	2.24336e-07	1.28738e-06
P3H3	312.551	1.4912	0.3108	2.29583e-07	1.31595e-06
LRP5	128.863	1.5712	0.3299	2.2972e-07	1.31623e-06
APRT	579.573	1.332	0.2768	2.30196e-07	1.31812e-06
HRC	27.161	1.9877	0.4212	2.30229e-07	1.31812e-06
FBXL14	43.52	1.7962	0.3809	2.34654e-07	1.34034e-06
ZNRD2	102.606	2.184	0.4684	2.37878e-07	1.35612e-06
HPS1	369.226	1.0168	0.2075	2.38411e-07	1.35864e-06
H2AC21	977.265	1.1443	0.2354	2.3916e-07	1.36171e-06
LOC105378130	88.264	1.4173	0.2963	2.42064e-07	1.37573e-06
GMPPB	345.094	1.5047	0.3159	2.44261e-07	1.38716e-06
RHOG	121.957	1.2725	0.2645	2.48836e-07	1.4088e-06
ALG12	295.933	1.1508	0.2374	2.4911e-07	1.40981e-06
KIF7	149.7	1.0179	0.2083	2.50874e-07	1.41925e-06
RAB43P1	29.702	2.2419	0.4821	2.5751e-07	1.45511e-06
FAU	1433.51	1.3404	0.2804	2.59164e-07	1.46278e-06
NAGPA	137.099	1.1505	0.2379	2.59395e-07	1.46352e-06
YIF1A	265.141	1.4171	0.2973	2.6031e-07	1.467e-06
MCM2	795.655	1.2109	0.2515	2.64115e-07	1.48731e-06
QSOX1	1452.97	1.1062	0.2282	2.65095e-07	1.49226e-06
VPS18	1099.54	1.0808	0.2226	2.65571e-07	1.49437e-06
MYBL2	547.444	1.1438	0.2366	2.67903e-07	1.50577e-06
BSCL2	30.055	2.356	0.5089	2.70111e-07	1.51644e-06
PHLDB3	39.468	1.715	0.3644	2.70967e-07	1.5201e-06
EPHA2	940.323	1.1701	0.2425	2.71253e-07	1.52112e-06
H3C11	576.83	1.2763	0.2663	2.71878e-07	1.52243e-06
UBQLN4P1	112.133	1.2578	0.2622	2.74785e-07	1.538e-06
DUS3L	179.683	2.1411	0.4618	2.77177e-07	1.55022e-06
FBF1	62.985	1.2953	0.2709	2.80139e-07	1.56547e-06
ATOX1	883.759	1.2444	0.2595	2.81583e-07	1.57188e-06
IQCE	372.965	1.221	0.2544	2.8478e-07	1.58732e-06
COX17	273.507	1.1859	0.2467	2.86198e-07	1.59402e-06
UBE2O	660.513	1.2301	0.2564	2.8657e-07	1.59549e-06
RPL18AP3	1305.29	1.6402	0.3494	2.96973e-07	1.64906e-06
POLR2F	1418.95	1.243	0.26	3.05762e-07	1.69403e-06
C9orf16	34.797	2.9492	0.6467	3.06095e-07	1.69524e-06
SPHK2	36.719	1.7031	0.3639	3.10764e-07	1.71916e-06
MVP	736.025	1.5968	0.3404	3.12175e-07	1.72632e-06
WDR83	38.286	1.9932	0.4299	3.1351e-07	1.73241e-06
LOC107984118	12.655	4.4349	0.898	3.13794e-07	1.73333e-06
H4C4	1877.96	1.5685	0.3335	3.23335e-07	1.7807e-06
MFSD3	38.072	2.0215	0.4369	3.24526e-07	1.78592e-06
THOC6	218.32	1.6063	0.343	3.26398e-07	1.79555e-06
LOC729086	40.666	1.8524	0.399	3.26989e-07	1.79814e-06
XRCC3	226.507	1.2044	0.2526	3.31211e-07	1.82e-06
PIEZO1	329.774	1.5522	0.3312	3.3443e-07	1.83632e-06
H2BU1	309.128	1.6375	0.3508	3.37631e-07	1.85114e-06
RALGDS	177.153	1.208	0.2533	3.38068e-07	1.85285e-06
FAM98C	115.167	1.3826	0.2931	3.41218e-07	1.86664e-06
TEAD3	127.119	1.0523	0.2185	3.41902e-07	1.86969e-06
B3GAT3	219.23	1.7354	0.3736	3.43129e-07	1.87501e-06
AGAP2-AS1	46.948	1.8015	0.3882	3.4328e-07	1.87514e-06
RPS15P4	497.497	1.5269	0.3259	3.44792e-07	1.88201e-06
U2AF2	2017.87	1.2939	0.2736	3.48164e-07	1.8976e-06
SGF29	99.101	1.2689	0.2676	3.53716e-07	1.92644e-06
TSPO	539.894	2.3869	0.5253	3.61173e-07	1.96488e-06
SLC27A4	334.312	1.3508	0.2864	3.6266e-07	1.97224e-06
TMEM204	64.941	1.1697	0.2454	3.65633e-07	1.98767e-06
PSD4	181.097	1.0211	0.2123	3.65972e-07	1.98878e-06
DDX39A	773.804	1.1908	0.2504	3.67387e-07	1.99501e-06
LAMB2	1049.04	1.2182	0.2567	3.69479e-07	2.00489e-06
RPL37P23	914.331	1.3	0.2761	3.70474e-07	2.00881e-06
METTL26	197.528	1.6587	0.3573	3.73059e-07	2.0206e-06
KLC4	130.718	1.3818	0.2938	3.73294e-07	2.02113e-06
ECH1	433.054	1.1363	0.2384	3.81993e-07	2.06747e-06
DPM3	57.382	2.3126	0.5081	3.84293e-07	2.07763e-06
MAU2	343.248	1.1083	0.2323	3.89434e-07	2.10311e-06
RPS19	6238.42	1.3793	0.2937	3.91447e-07	2.11244e-06
GIPC1	1103.38	1.4476	0.3084	3.98564e-07	2.14535e-06
AP2A1	761.286	1.1342	0.2384	4.00814e-07	2.15668e-06
PITPNM2	125.723	1.3994	0.2988	4.05583e-07	2.17757e-06
PGLS	128.814	1.4855	0.3187	4.07137e-07	2.18512e-06
PGP	478.907	1.0373	0.2169	4.14441e-07	2.22352e-06
BST2	219.673	1.1462	0.2416	4.16192e-07	2.23047e-06
COL18A1	420.37	2.3773	0.5255	4.18045e-07	2.23959e-06
VWA5A	71.003	1.1611	0.2449	4.20232e-07	2.24804e-06
ELOB	869.212	2.2392	0.4942	4.35774e-07	2.32529e-06
PLK3	71.499	1.385	0.2968	4.41806e-07	2.35577e-06
MCRIP1	351.918	2.4235	0.5389	4.52876e-07	2.40957e-06
H3C4	1184.73	1.5447	0.3341	4.54707e-07	2.41844e-06
TSPAN17	453.012	1.0711	0.2254	4.56206e-07	2.42554e-06
FOXRED1	299.819	1.0766	0.2269	4.62274e-07	2.45426e-06
EXOC3L2	61.196	1.5812	0.3426	4.63559e-07	2.45931e-06
DCXR	270.33	1.5225	0.3294	4.65298e-07	2.46765e-06
FBXO6	79.559	1.3599	0.292	4.70069e-07	2.49206e-06
AKR1B10P1	14.167	3.6937	0.8011	4.70535e-07	2.49363e-06
RASSF1	197.143	1.076	0.2271	4.74838e-07	2.51553e-06
INTS5	254.187	1.1339	0.2403	4.81056e-07	2.54573e-06
ANAPC2	52.038	1.8494	0.4057	4.82502e-07	2.55247e-06
HDHD3	126.992	1.1808	0.2513	4.83288e-07	2.5548e-06
ROMO1	925.974	1.5573	0.3384	4.9326e-07	2.60358e-06
PORCN	90.69	1.164	0.2474	4.93398e-07	2.60358e-06
RFXANK	238.339	1.1357	0.2412	5.0411e-07	2.65346e-06
RUSC2	293.414	1.4538	0.3146	5.09849e-07	2.68112e-06
ASB16-AS1	104.78	1.064	0.2249	5.10993e-07	2.68585e-06
SLC25A19	167.439	1.0527	0.2225	5.14621e-07	2.70396e-06
QPCTL	137.528	1.1134	0.2363	5.15707e-07	2.7087e-06
GGA1	634.679	1.0769	0.2282	5.25919e-07	2.76136e-06
CPLANE2	33.93	2.3688	0.5295	5.29993e-07	2.78176e-06
RPS10P19	3069.48	1.2252	0.2627	5.43299e-07	2.84552e-06
EGFL7	89.991	3.3581	0.7634	5.53234e-07	2.89242e-06
C11orf98	62.819	1.892	0.4188	5.61101e-07	2.92836e-06
JMJD8	247.004	1.4079	0.3056	5.63002e-07	2.93621e-06
SELENOO	74.216	2.3082	0.5172	5.7431e-07	2.9899e-06
SHKBP1	402.843	1.4308	0.3112	5.78842e-07	3.01031e-06
FTH1P12	37.129	2.0057	0.4455	5.85889e-07	3.04266e-06
RN7SL3	29181.4	1.984	0.4433	5.88568e-07	3.05443e-06
SCRN2	174.679	1.5704	0.3442	5.89914e-07	3.05926e-06
PLEKHM2	646.092	1.3602	0.2948	5.98005e-07	3.09795e-06
RCE1	72.161	1.4195	0.3091	6.01288e-07	3.11387e-06
BCKDK	229.637	1.0298	0.2188	6.05538e-07	3.13368e-06
NUDT22	121.672	1.9385	0.4313	6.12666e-07	3.16723e-06
CAMKK1	107.671	1.141	0.2449	6.24354e-07	3.22313e-06
C11orf68	138.147	1.5414	0.3382	6.25113e-07	3.22592e-06
CCDC130	101.649	1.2868	0.2785	6.25568e-07	3.22714e-06
ELL	121.577	1.4371	0.3142	6.43302e-07	3.30759e-06
AGAP3	351.858	1.1811	0.2542	6.43404e-07	3.30759e-06
BAP1	781.687	1.1905	0.2566	6.45692e-07	3.31704e-06
LPIN3	144.192	1.2739	0.276	6.47173e-07	3.32349e-06
SCARA5	31.924	1.5927	0.3496	6.50303e-07	3.3384e-06
LOC105375519	136.642	1.0286	0.2192	6.51577e-07	3.34378e-06
GRK2	250.424	1.438	0.3147	6.57279e-07	3.3707e-06
RPS17P16	1428.38	1.1695	0.252	6.61538e-07	3.39136e-06
TPM2	62.011	1.7351	0.3845	6.63041e-07	3.39789e-06
FAM160A2	165.996	1.0429	0.2227	6.65128e-07	3.40621e-06
CHRNA6	97.97	1.2061	0.2608	6.8296e-07	3.49147e-06
DHX37	527.639	1.2638	0.2743	6.84926e-07	3.50031e-06
SPOCK3	13.164	5.6838	1.309	6.99033e-07	3.56746e-06
IER5L	28.005	1.905	0.425	7.03048e-07	3.58409e-06
ZNF688	47.744	1.4321	0.314	7.08678e-07	3.60749e-06
RNF126	71.598	1.6939	0.3764	7.12408e-07	3.62319e-06
MYL6B	721.254	1.2723	0.2769	7.29692e-07	3.70598e-06
PGAP3	196.001	1.2482	0.2716	7.30256e-07	3.70629e-06
PPP6R2	818.463	1.1055	0.2383	7.32803e-07	3.71666e-06
RAB36	55.553	1.6794	0.3733	7.44006e-07	3.76628e-06
C1orf35	113.164	1.5482	0.3429	7.48144e-07	3.78277e-06
UROD	897.112	1.0455	0.2246	7.60243e-07	3.8356e-06
TTC4	134.755	1.0213	0.2192	7.63967e-07	3.85221e-06
FCGRT	109.076	1.1851	0.2575	7.70661e-07	3.88199e-06
FBXW9	42.11	1.9118	0.4297	7.82938e-07	3.93845e-06
AKT1S1	246.21	1.0345	0.2226	8.02325e-07	4.02992e-06
LY96	755.165	1.2394	0.2708	8.02488e-07	4.02992e-06
CYTH2	674.964	1.1648	0.2531	8.07347e-07	4.05294e-06
H2BC10	1386.91	1.5735	0.3499	8.11205e-07	4.06816e-06
QTRT1	59.223	2.0813	0.4718	8.11665e-07	4.06908e-06
UPF1	558.579	1.1365	0.2467	8.1971e-07	4.10244e-06
GIT1	661.212	1.3103	0.2879	8.41139e-07	4.19972e-06
PRKAR1B-AS1	122.496	1.0816	0.2341	8.43442e-07	4.20979e-06
RN7SKP255	43.04	2.5423	0.5834	8.43811e-07	4.21021e-06
IRF2BP1	152.275	1.5075	0.3351	8.52961e-07	4.25078e-06
POLRMTP1	29.623	2.0111	0.4557	8.52531e-07	4.25078e-06
MIIP	136.693	1.8123	0.4084	8.59765e-07	4.27968e-06
LRRC75B	20.149	2.3331	0.5302	8.6837e-07	4.31523e-06
EDC4	806.381	1.0319	0.2228	8.69598e-07	4.31988e-06
LINC00536	14.87	5.7993	1.357	8.79219e-07	4.3618e-06
CDC42EP2	23.062	1.7909	0.4021	8.8248e-07	4.37504e-06
PEX14	187.058	1.3754	0.3045	9.14661e-07	4.52546e-06
RRP12	711.255	1.4047	0.3117	9.2994e-07	4.59304e-06
MAP2K3	324.978	1.1578	0.2531	9.4007e-07	4.64028e-06
IL13RA2	34.191	1.5481	0.345	9.46931e-07	4.67102e-06
SMARCD3	213.761	1.0998	0.2396	9.51109e-07	4.68536e-06
UBTD1	50.727	2.5315	0.5843	9.60393e-07	4.72321e-06
COX17P1	354.611	1.1852	0.2603	9.64949e-07	4.74404e-06
FXYD5	730.122	1.1342	0.2479	9.6739e-07	4.75445e-06
MZT2A	100.842	1.5489	0.3476	9.7209e-07	4.77521e-06
NAPA	1077.35	1.1107	0.2424	9.76544e-07	4.79465e-06
CYP26B1	27.212	1.7132	0.386	9.80684e-07	4.81338e-06
MYBPC1	14.646	2.7149	0.6122	9.82871e-07	4.8209e-06
ADRA2C	56.028	1.4103	0.3142	1.0014e-06	4.9004e-06
TIMM13	511.721	1.4543	0.3249	1.00911e-06	4.93319e-06
ROPN1L	13.538	2.5359	0.5771	1.01309e-06	4.94936e-06
MAPK3	221.279	1.4473	0.3236	1.01528e-06	4.95845e-06
C4BPAP1	22.057	2.0701	0.4698	1.03098e-06	5.02678e-06
ZNF282	281.431	1.2426	0.2748	1.04448e-06	5.08589e-06
ZNHIT1	1384.27	1.1947	0.2633	1.04619e-06	5.09253e-06
GSEC	52.141	1.212	0.2676	1.05093e-06	5.11225e-06
TAGLN	57.332	2.2823	0.5283	1.05574e-06	5.13226e-06
JMJD4	98.899	1.9209	0.4393	1.05938e-06	5.14825e-06
MAP3K11	360.97	1.572	0.3544	1.06533e-06	5.17376e-06
TRAPPC5	45.018	2.5656	0.5963	1.07552e-06	5.21295e-06
UBXN1	411.667	1.1438	0.2518	1.07932e-06	5.22966e-06
FAT2	34.921	1.6323	0.3674	1.08279e-06	5.24476e-06
CALHM2	56.382	1.5297	0.3443	1.1034e-06	5.34106e-06
LINC01278	119.293	1.1893	0.2625	1.11778e-06	5.40535e-06
LOC105374027	48.393	1.5129	0.3395	1.1191e-06	5.40995e-06
OGFOD3	307.49	1.2181	0.27	1.13147e-06	5.46616e-06
USP27X-DT	48.763	1.1746	0.2589	1.13786e-06	5.49526e-06
WDR83OS	839.52	1.2771	0.284	1.14677e-06	5.53466e-06
SGSM3	550.569	1.2028	0.2663	1.15764e-06	5.58347e-06
SCARNA2	636.237	3.189	0.7522	1.16157e-06	5.60061e-06
PUS1	156.991	1.136	0.2508	1.17612e-06	5.6652e-06
TMEM139	45.128	1.4172	0.3183	1.19483e-06	5.74406e-06
CRTC2	72.378	1.2227	0.2715	1.20394e-06	5.78222e-06
LIG1	877.722	1.0244	0.2245	1.21192e-06	5.81864e-06
CDK10	171.016	1.3843	0.3113	1.2256e-06	5.8757e-06
B4GALT7	115.249	1.7123	0.3915	1.23645e-06	5.92483e-06
GAMT	116.593	1.5514	0.352	1.23698e-06	5.92544e-06
LOC344967	27.667	1.8755	0.431	1.25729e-06	6.01296e-06
TSC22D4	287.161	1.7044	0.39	1.27807e-06	6.10842e-06
UBE2SP2	74.745	1.8554	0.4273	1.28661e-06	6.14323e-06
WDR62	115.881	1.3408	0.3014	1.29933e-06	6.19998e-06
SLC31A2	35.084	2.0749	0.4807	1.32579e-06	6.31193e-06
MICALL1	494.008	1.043	0.2298	1.32807e-06	6.31936e-06
LMNB2	752.313	1.1716	0.2608	1.33818e-06	6.36068e-06
SPPL2B	56.741	1.5075	0.3427	1.35526e-06	6.43358e-06
RBM10	880.742	1.227	0.2744	1.36129e-06	6.45973e-06
TONSL	50.18	1.8369	0.4242	1.37546e-06	6.52317e-06
GCAT	174.804	1.3226	0.298	1.382e-06	6.54866e-06
LAMTOR4	1074.45	1.5803	0.3608	1.38471e-06	6.55861e-06
PTPA	1741.97	1.0401	0.2296	1.39025e-06	6.58059e-06
ERFE	14.599	2.1775	0.5007	1.39569e-06	6.60425e-06
ACD	77.546	1.9548	0.4537	1.39833e-06	6.6125e-06
SLC7A11-AS1	28.357	1.8085	0.4138	1.40362e-06	6.63323e-06
VPS28	180.11	1.4003	0.3173	1.40938e-06	6.65836e-06
RALY	1723.17	1.0134	0.2233	1.41201e-06	6.66864e-06
CRISPLD2	35.218	1.8026	0.4143	1.41307e-06	6.67148e-06
EEF1DP1	119.378	1.7684	0.4087	1.44055e-06	6.79038e-06
H3C3	1709.4	2.0386	0.4758	1.46884e-06	6.91267e-06
TMEM201	302.05	1.2387	0.2783	1.47313e-06	6.92403e-06
UBE2S	69.847	1.7851	0.4139	1.51736e-06	7.11834e-06
ACO2	1405.95	1.0819	0.2408	1.52799e-06	7.16363e-06
ABCC10	238.892	1.1526	0.2578	1.54265e-06	7.23005e-06
EVI5L	41.294	1.537	0.3522	1.56223e-06	7.31718e-06
SF3B5	1528.39	1.4716	0.3356	1.56737e-06	7.33894e-06
DIRC3-AS1	73.268	1.0051	0.2224	1.57802e-06	7.38413e-06
ZNF335	150.675	1.2049	0.2711	1.60921e-06	7.51577e-06
DDX12P	44.456	1.4459	0.3303	1.61294e-06	7.53078e-06
RAC2	55.186	1.1723	0.2628	1.61988e-06	7.56056e-06
EEPD1	97.259	1.2768	0.2888	1.62242e-06	7.56546e-06
COQ4	158.217	1.4151	0.3231	1.63895e-06	7.63532e-06
VPS16	843.777	1.1867	0.2669	1.64402e-06	7.65413e-06
NACC1	393.718	1.2305	0.2779	1.66695e-06	7.75354e-06
CERCAM	142.418	1.2037	0.2717	1.70504e-06	7.91822e-06
PRKCB	30.075	1.9391	0.4519	1.70809e-06	7.92741e-06
RPS6KA4	326.967	1.0203	0.2271	1.70801e-06	7.92741e-06
BLOC1S1	844.871	1.0941	0.2451	1.71418e-06	7.95066e-06
IL1A	76.792	1.7759	0.4137	1.72735e-06	8.00166e-06
WDR6	1073.91	1.111	0.2491	1.72947e-06	8.00897e-06
CTDP1	65.818	1.6324	0.3781	1.73992e-06	8.04977e-06
FZR1	122.184	1.5645	0.3614	1.74903e-06	8.08942e-06
LOC105377621	41.833	1.318	0.2992	1.75137e-06	8.09513e-06
ELOF1	518.638	1.2744	0.29	1.78356e-06	8.23361e-06
RRP1	544.407	1.2091	0.2739	1.80713e-06	8.33459e-06
TARBP2	335.514	1.3239	0.3025	1.84652e-06	8.49504e-06
OXLD1	135.213	1.3761	0.3157	1.86708e-06	8.58695e-06
RNF40	1378.81	1.0668	0.2392	1.87147e-06	8.60445e-06
MGC15885	27.003	2.3784	0.5602	1.90445e-06	8.73703e-06
TRAF1	103.545	1.1739	0.2661	1.92348e-06	8.80518e-06
PRKAR1B	171.145	1.111	0.2506	1.92736e-06	8.82016e-06
SARS2	204.2	1.2325	0.2809	1.94517e-06	8.8879e-06
ECM1	1114.61	1.0324	0.2315	1.95981e-06	8.94925e-06
CYYR1-AS1	11.728	4.803	1.0281	1.96274e-06	8.95986e-06
H2AC16	522.186	1.511	0.3508	1.99324e-06	9.09627e-06
U2AF1L4	56.571	1.406	0.3241	1.9944e-06	9.09876e-06
MOGS	980.265	1.036	0.2328	2.02483e-06	9.2347e-06
CCDC28B	103.62	1.2489	0.2855	2.02958e-06	9.25352e-06
ID3	1266.96	1.1836	0.2695	2.03355e-06	9.26589e-06
MFSD10	62.184	1.7752	0.418	2.04944e-06	9.32965e-06
MRPS2	229.485	1.2422	0.2837	2.06541e-06	9.39945e-06
RANGAP1	1343.5	1.1913	0.2718	2.07189e-06	9.42314e-06
ARHGEF18	376.428	1.0025	0.2251	2.07417e-06	9.4306e-06
ACADS	68.354	1.9466	0.4613	2.07556e-06	9.43403e-06
EXOC3-AS1	41.334	1.5139	0.3512	2.08553e-06	9.47641e-06
RPS15P2	97.344	2.097	0.5004	2.11778e-06	9.60815e-06
NCKAP5L	188.507	1.7761	0.4185	2.13951e-06	9.68886e-06
SLC66A2	62.422	1.71	0.4023	2.14529e-06	9.71206e-06
ANKS3	85.382	1.4723	0.3426	2.17558e-06	9.82809e-06
SERTAD4-AS1	173.688	1.2621	0.2899	2.18018e-06	9.84294e-06
MAPK8IP3	163.469	1.2802	0.2943	2.19839e-06	9.91896e-06
RPS28P4	31.802	2.8824	0.7005	2.21395e-06	9.98611e-06
DPM2	349.976	1.0664	0.2414	2.22547e-06	1.0032e-05
CLEC11A	231.855	1.5165	0.3541	2.23906e-06	1.0084e-05
ZNF534	36.883	1.6194	0.379	2.25214e-06	1.01367e-05
VPS9D1	34.207	2.1214	0.5068	2.27792e-06	1.02402e-05
SH3BP5L	549.352	1.0751	0.2439	2.28391e-06	1.0264e-05
PRDX1P1	71.122	1.2374	0.2846	2.34319e-06	1.05176e-05
UQCRC1	2865.28	1.0213	0.23	2.35711e-06	1.0571e-05
TIE1	155.974	1.0041	0.2268	2.36015e-06	1.05809e-05
ZNF598	185.533	1.1355	0.2594	2.3769e-06	1.06431e-05
GLP2R	30.263	1.5113	0.3527	2.41817e-06	1.08114e-05
ALKBH7	46.051	1.9537	0.4677	2.48568e-06	1.10998e-05
RTKN	324.709	1.0075	0.2282	2.48888e-06	1.11074e-05
RIN1	28.342	1.9196	0.4585	2.50896e-06	1.11868e-05
ADGRD1	12.635	3.205	0.7608	2.52815e-06	1.12656e-05
H2BC5	3842.6	1.201	0.2766	2.54294e-06	1.13281e-05
H2AC11	2034.05	1.4539	0.3398	2.57374e-06	1.14514e-05
ST6GALNAC6	155.02	1.1592	0.2664	2.61857e-06	1.16404e-05
SART1	398.304	1.2857	0.2984	2.63576e-06	1.17133e-05
ARSA	159.715	1.3628	0.3181	2.65288e-06	1.17823e-05
TECPR1	283.842	1.392	0.3256	2.65844e-06	1.17998e-05
COX8A	2022.86	1.2027	0.2789	2.66216e-06	1.18128e-05
ICAM3	97.54	1.5012	0.3541	2.73719e-06	1.21229e-05
RPL18	3862.65	1.1592	0.268	2.79213e-06	1.23375e-05
RPL13AP5	7661.69	1.0025	0.2283	2.82222e-06	1.2463e-05
TAPBPL	62.156	1.3972	0.3281	2.85887e-06	1.26098e-05
RUNDC3A	21.87	2.0076	0.483	2.86839e-06	1.26406e-05
LOC105374473	46.63	1.298	0.3023	2.92343e-06	1.28638e-05
FAM234A	602.537	1.1217	0.2587	2.9379e-06	1.29159e-05
RPTOR	441.785	1.2119	0.2815	2.96353e-06	1.3017e-05
CHID1	322.305	1.257	0.2926	2.9944e-06	1.31369e-05
ECSIT	146.193	1.4981	0.3551	3.02373e-06	1.32605e-05
ATP5F1D	36.807	2.076	0.5043	3.07749e-06	1.34801e-05
PACS2	142.098	1.2182	0.2836	3.07812e-06	1.34801e-05
INF2	170.109	1.3216	0.31	3.08687e-06	1.35145e-05
RUSC1	217.368	1.0087	0.2311	3.09241e-06	1.35347e-05
DUSP2	56.33	1.5796	0.3766	3.10255e-06	1.3575e-05
TMEM158	109.321	1.2589	0.2946	3.13509e-06	1.37093e-05
KLHL25	75.893	1.3777	0.3248	3.16111e-06	1.38189e-05
SLC2A8	72.876	1.1603	0.2693	3.1939e-06	1.39499e-05
CHTF18	34.795	2.1689	0.5302	3.20606e-06	1.39865e-05
ARL2	143.2	1.5497	0.3696	3.20516e-06	1.39865e-05
VILL	43.001	1.4649	0.3477	3.27512e-06	1.42751e-05
FRMD8	630.288	1.0625	0.2452	3.28207e-06	1.42957e-05
TK1	605.334	1.2318	0.2886	3.28276e-06	1.42957e-05
H3C10	761.09	2.2694	0.5575	3.28571e-06	1.43043e-05
ADAP1	29.128	1.9299	0.4686	3.34527e-06	1.45336e-05
POLR2L	541.133	2.0584	0.5036	3.34831e-06	1.45425e-05
LYPLA2	394.113	1.3785	0.3263	3.37263e-06	1.46396e-05
LZTR1	305.586	1.0708	0.248	3.42674e-06	1.48569e-05
DGAT1	108.028	1.3935	0.3307	3.45339e-06	1.49637e-05
PRMT7	361.831	1.0203	0.2352	3.46216e-06	1.49973e-05
STX1A	24.527	2.1379	0.5234	3.53046e-06	1.52707e-05
LINC02709	31.701	1.5137	0.3622	3.6361e-06	1.5668e-05
LTBP3	85.757	1.467	0.3505	3.6725e-06	1.58063e-05
CCDC137	565.226	1.0602	0.2462	3.72552e-06	1.60205e-05
PRKCSH	820.263	1.1078	0.2582	3.73338e-06	1.60449e-05
ZFYVE28	32.372	1.642	0.3967	3.76181e-06	1.61436e-05
DHX34	352.89	1.0666	0.2479	3.76134e-06	1.61436e-05
LOC105378339	15.624	2.9709	0.7305	3.77859e-06	1.62015e-05
ARHGDIA	651.651	1.3988	0.333	3.81114e-06	1.63221e-05
SYNGR2	179.338	1.408	0.3363	3.82775e-06	1.63837e-05
PLAUR	472.682	1.2003	0.2823	3.87986e-06	1.65923e-05
PLEKHH3	36.14	2.0719	0.5111	3.89964e-06	1.66721e-05
NPHP4	105.828	1.1279	0.2642	3.96889e-06	1.69485e-05
RMRP	79547.8	2.2693	0.5679	4.02789e-06	1.71706e-05
ZNF775	30.403	2.1233	0.5251	4.0708e-06	1.73335e-05
H2BC17	1650.59	1.1657	0.2747	4.07447e-06	1.73391e-05
SYDE1	156.615	1.0604	0.2476	4.10342e-06	1.74422e-05
RPLP2P3	51.132	1.8482	0.4535	4.13131e-06	1.75557e-05
CCDC106	28.915	1.5993	0.3874	4.17691e-06	1.77137e-05
ARHGEF1	261.771	1.6417	0.3995	4.22992e-06	1.7918e-05
RPLP2P5	45.315	2.5458	0.6398	4.27722e-06	1.80924e-05
BCYRN1	536.945	1.1707	0.2766	4.30494e-06	1.81939e-05
MLST8	115.411	1.613	0.3925	4.31871e-06	1.82469e-05
FBXL19	184.159	1.4489	0.3503	4.53801e-06	1.90751e-05
SAMD11	29.936	2.0306	0.5041	4.56177e-06	1.91696e-05
SNRPD2	7226.72	1.0295	0.2414	4.61534e-06	1.93726e-05
MARCHF2	131.429	1.0758	0.2531	4.62169e-06	1.93937e-05
TRAF7	404.28	1.3326	0.32	4.66455e-06	1.95514e-05
RHBDF1	177.919	1.4038	0.3389	4.67891e-06	1.9598e-05
UQCR11	1051.67	1.0504	0.2467	4.73594e-06	1.98112e-05
TRAF4	843.922	1.0105	0.2368	4.84299e-06	2.02099e-05
FBXO27	33.019	1.67	0.4092	4.87582e-06	2.03214e-05
POLL	141.608	1.2284	0.294	4.98168e-06	2.07334e-05
RPL35P5	213.989	1.3591	0.328	5.00479e-06	2.08178e-05
MYPN	17.111	2.2767	0.5647	5.01198e-06	2.08418e-05
ERVK3-1	220.054	1.3991	0.339	5.01547e-06	2.08504e-05
TRIM28	3646.48	1.1332	0.2701	5.08323e-06	2.11125e-05
ZER1	177.4	1.1796	0.2813	5.09682e-06	2.11529e-05
LINC01679	66.932	1.4511	0.3528	5.09991e-06	2.11597e-05
PNKP	102.578	1.2445	0.2984	5.10898e-06	2.11914e-05
RPS28P7	371.891	2.4431	0.6209	5.19225e-06	2.15057e-05
PTBP1	1118.56	1.1389	0.2718	5.19177e-06	2.15057e-05
ENDOV	18.718	2.262	0.566	5.20225e-06	2.15359e-05
TEX50	19.952	2.0959	0.5182	5.21762e-06	2.15933e-05
MDK	80.355	1.3772	0.334	5.21904e-06	2.15933e-05
RPS9P2	137.628	1.6598	0.4101	5.33326e-06	2.20084e-05
AMPD2	278.962	1.103	0.2624	5.44046e-06	2.24089e-05
TAF6	264.726	1.1258	0.2682	5.45995e-06	2.24829e-05
ALX4	27.293	1.9922	0.4986	5.58443e-06	2.29506e-05
ACTN4P1	21.832	1.9008	0.4739	5.60539e-06	2.30303e-05
SMPD4	599.742	1.0718	0.2542	5.62326e-06	2.30973e-05
PQBP1	639.902	1.184	0.2837	5.74903e-06	2.35549e-05
FRMPD4	37.817	1.3871	0.3379	5.78751e-06	2.36862e-05
RANBP1P1	464.581	1.0495	0.2491	5.79265e-06	2.37007e-05
PLA2G6	53.03	1.4083	0.3442	5.79484e-06	2.37031e-05
MAZ	1619.89	1.0183	0.2412	5.82543e-06	2.3815e-05
TSPAN4	423.334	2.4853	0.6367	5.85347e-06	2.39164e-05
ZNF444	80.994	1.2085	0.2911	5.89536e-06	2.40609e-05
RABAC1	114.032	1.8365	0.4607	5.92863e-06	2.419e-05
SYNGR1	188.467	1.1664	0.2804	5.93172e-06	2.41959e-05
LOC107987237	32.459	1.7468	0.4342	5.94289e-06	2.42344e-05
MMP17	124.39	1.9882	0.5018	5.97749e-06	2.43557e-05
CUEDC2	296.593	1.0753	0.2564	5.99502e-06	2.44204e-05
GAPDHP1	139.701	1.5887	0.3939	6.13269e-06	2.49467e-05
MRC2	67.3	1.6465	0.4099	6.18015e-06	2.5119e-05
CCDC9	75.748	1.5676	0.3886	6.20975e-06	2.52115e-05
LRFN4	28.036	2.4164	0.6194	6.23043e-06	2.52746e-05
LZTS2	458.538	1.0905	0.2608	6.25162e-06	2.53466e-05
EHD2	18.018	2.1377	0.5391	6.38019e-06	2.58112e-05
LRRC8E	46.38	1.2862	0.3134	6.38794e-06	2.58354e-05
CCDC124	65.281	2.1992	0.5628	6.65827e-06	2.68919e-05
ST3GAL3	122.387	1.1654	0.282	6.72668e-06	2.71533e-05
LRG1	26.554	1.8022	0.4538	6.87734e-06	2.77009e-05
CX3CL1	110.593	1.0144	0.2425	6.8908e-06	2.77475e-05
LFNG	20.027	2.0548	0.5237	7.01628e-06	2.81989e-05
FAM225A	53.669	1.3413	0.3296	7.02744e-06	2.82361e-05
C2orf72	39.858	1.3298	0.3264	7.03225e-06	2.82477e-05
NOTCH1	229.15	1.2634	0.3093	7.06672e-06	2.8363e-05
STK11IP	250.93	1.4592	0.3623	7.13429e-06	2.86108e-05
FAM207A	32.865	2.0241	0.5167	7.25467e-06	2.90541e-05
ISYNA1	67.18	1.4651	0.3645	7.36451e-06	2.94541e-05
CEP131	77.145	2.0349	0.5215	7.44237e-06	2.97413e-05
H4C6	1904.61	1.3316	0.3285	7.5099e-06	2.99705e-05
EME2	83.365	1.2413	0.3048	7.73065e-06	3.07766e-05
NCDN	273.404	1.0884	0.2639	7.82773e-06	3.11295e-05
DGCR2	894.282	1.0677	0.2585	7.92138e-06	3.1468e-05
GAPDHP72	152.899	1.2958	0.3201	7.973e-06	3.1656e-05
BTBD2	87.419	1.8216	0.465	8.05745e-06	3.19483e-05
LOC112268266	33.274	1.2896	0.3179	8.20666e-06	3.24788e-05
COL16A1	275.759	1.3144	0.3258	8.23764e-06	3.2584e-05
TST	176.861	1.1872	0.2916	8.30574e-06	3.28357e-05
TSKU	114.596	1.0641	0.258	8.37098e-06	3.30729e-05
PCNX3	173.833	1.0926	0.2659	8.39864e-06	3.31586e-05
H1-9P	75.264	1.5906	0.4024	8.48415e-06	3.34514e-05
GPX1	725.219	1.1392	0.2792	8.71452e-06	3.42681e-05
APOBEC3G	51.845	1.041	0.253	9.06731e-06	3.55027e-05
IFT140	153.108	1.1355	0.2787	9.06939e-06	3.55027e-05
ACSF2	76.571	1.2602	0.3134	9.43595e-06	3.68204e-05
RAB1B	346.703	1.3685	0.3432	9.44988e-06	3.6865e-05
RPS10P3	129.485	1.3089	0.3271	9.46388e-06	3.69099e-05
EXOSC5	188.187	1.8484	0.4778	9.52091e-06	3.70833e-05
ZSWIM8	701.685	1.0651	0.2604	9.54631e-06	3.71626e-05
SIRT6	51.755	1.9792	0.5147	9.62336e-06	3.74132e-05
SPRR2D	16.886	2.1355	0.5517	9.66123e-06	3.75406e-05
TOMM40	568.02	1.185	0.2932	9.67346e-06	3.75783e-05
ZNF408	67.655	1.5471	0.3935	9.70625e-06	3.76957e-05
EEF1AKMT4	74.082	1.3661	0.3434	9.75486e-06	3.78645e-05
PAQR4	475.306	1.0997	0.2704	9.84828e-06	3.8197e-05
RN7SKP203	24.594	2.709	0.7211	1.00774e-05	3.90139e-05
CHCHD6	146.224	1.0847	0.2668	1.01069e-05	3.91178e-05
SERINC2	30.254	1.8164	0.4696	1.02232e-05	3.95163e-05
PLXNA3	77.459	1.3157	0.331	1.07952e-05	4.15312e-05
SNHG9	52.66	1.6557	0.427	1.0843e-05	4.16826e-05
SBF1	862.518	1.9728	0.5195	1.08483e-05	4.16922e-05
SCARNA17	55.378	1.7369	0.4502	1.08588e-05	4.17217e-05
PIK3CD-AS2	54.663	1.3328	0.3362	1.0999e-05	4.22272e-05
IDH3G	306.44	1.2919	0.3253	1.10424e-05	4.23497e-05
NECTIN1	163.748	1.0094	0.2476	1.11254e-05	4.26015e-05
DNER	26.718	2.0815	0.5449	1.11634e-05	4.27249e-05
EMILIN1	944.932	1.4148	0.3599	1.12112e-05	4.28968e-05
NDUFS6	1171.95	1.1406	0.2841	1.12905e-05	4.31891e-05
ZNF668	43.565	1.8054	0.4704	1.13058e-05	4.32257e-05
MDP1	25.253	2.3101	0.6123	1.13286e-05	4.3301e-05
CROCC	95.704	1.4319	0.3652	1.14456e-05	4.37003e-05
METRNL	16.511	2.2141	0.5835	1.14617e-05	4.37418e-05
MAP1S	24.065	2.2373	0.5909	1.14863e-05	4.38017e-05
LOC102723834	70.738	1.1955	0.2995	1.16556e-05	4.44015e-05
ERCC2	266.436	1.1521	0.287	1.16653e-05	4.44268e-05
RPL35	1749.76	1.7241	0.451	1.18155e-05	4.49527e-05
LTBP4	35.748	2.4818	0.6641	1.18234e-05	4.49712e-05
RGS3	103.304	1.1582	0.2897	1.19305e-05	4.53317e-05
TUBB2B	505.349	1.0415	0.2578	1.20658e-05	4.57749e-05
TAC1	228.382	1.0361	0.2564	1.20852e-05	4.58249e-05
LINC01852	42.851	1.1601	0.2901	1.22919e-05	4.65713e-05
PRELID1	287.19	1.0709	0.2661	1.23956e-05	4.69068e-05
LINC02551	35.894	1.4648	0.3762	1.27108e-05	4.79629e-05
ANKRD13D	74.067	1.7717	0.4654	1.29153e-05	4.86725e-05
PRICKLE3	56.285	1.0113	0.2503	1.30578e-05	4.91342e-05
NBEAP1	34.859	1.3693	0.3487	1.30804e-05	4.9194e-05
ERF	432.001	1.3005	0.3312	1.31004e-05	4.92567e-05
PSKH1	138.383	1.1266	0.2822	1.31321e-05	4.93508e-05
FDXR	204.78	1.6162	0.4214	1.31463e-05	4.93789e-05
MXD4	69.126	1.5786	0.4114	1.36053e-05	5.10122e-05
COL5A3	17.638	1.9837	0.5253	1.36802e-05	5.12669e-05
GADD45B	40.519	1.449	0.3744	1.36953e-05	5.13104e-05
KIF17	82.312	1.321	0.338	1.38327e-05	5.17463e-05
H4C9	268.341	2.5026	0.6802	1.38751e-05	5.1884e-05
JUP	19.686	1.5025	0.3874	1.38765e-05	5.1884e-05
MYDGF	1934.93	1.001	0.2481	1.38862e-05	5.19068e-05
CABP4	20.963	1.735	0.4542	1.40507e-05	5.24689e-05
IGFLR1	44.161	1.0862	0.2722	1.42715e-05	5.32528e-05
RN7SL4P	713.991	1.956	0.5259	1.49616e-05	5.56029e-05
DENND3	25.052	1.4261	0.3681	1.50163e-05	5.5778e-05
DMPK	46.27	1.4371	0.373	1.52176e-05	5.64405e-05
ARAP1	426.112	1.1001	0.2776	1.52833e-05	5.66416e-05
ZNF777	95.211	1.0721	0.2697	1.53857e-05	5.69638e-05
RNU5A-8P	65.982	1.8949	0.5082	1.56042e-05	5.76716e-05
OBSL1	317.893	1.1004	0.2786	1.60564e-05	5.9298e-05
APOBEC3D	30.794	1.4253	0.371	1.64918e-05	6.07539e-05
CD70	62.772	1.1526	0.2946	1.69661e-05	6.23612e-05
DNLZ	35.188	1.9158	0.5163	1.70652e-05	6.26629e-05
RPS19P3	30.186	1.8066	0.4849	1.73323e-05	6.35226e-05
KMT5C	36.548	1.3369	0.3482	1.80844e-05	6.60929e-05
CASKIN2	51.941	1.4759	0.3886	1.81588e-05	6.63157e-05
FAM20C	105.966	1.204	0.3107	1.88249e-05	6.85276e-05
RNU5B-1	347.38	1.332	0.3487	1.92021e-05	6.97632e-05
NUMBL	92.479	1.0698	0.2731	1.9612e-05	7.1147e-05
CLN6	705.851	1.0806	0.277	2.01364e-05	7.28169e-05
H2AC8	2155.19	1.693	0.4559	2.03913e-05	7.36662e-05
IFRD2	290.72	1.2654	0.3308	2.05847e-05	7.4311e-05
CSK	392.89	1.1833	0.3066	2.06198e-05	7.44006e-05
SIX5	60.58	1.3395	0.3523	2.06756e-05	7.45838e-05
DBN1	322.818	1.0721	0.2765	2.11164e-05	7.59698e-05
RARA	362.092	1.0648	0.2734	2.13738e-05	7.67833e-05
H2BC21	1753.15	1.1389	0.2942	2.1435e-05	7.6947e-05
RAB40C	74.514	1.4816	0.396	2.18616e-05	7.83258e-05
SLC26A6	194.81	1.1617	0.3018	2.1922e-05	7.85041e-05
RPLP1P4	675.14	1.24	0.3246	2.19967e-05	7.87525e-05
CYB561A3	148.649	1.1405	0.2962	2.22522e-05	7.95515e-05
USP20	84.29	1.2237	0.3202	2.22912e-05	7.96331e-05
FAAP20	70.409	1.2212	0.3198	2.27102e-05	8.10711e-05
LOC100652758	40.944	1.1294	0.293	2.28317e-05	8.1426e-05
CENPM	193.962	1.3782	0.3667	2.31152e-05	8.23374e-05
CCDC113	73.377	1.0876	0.282	2.4233e-05	8.58426e-05
MAP3K2-DT	51.244	1.0584	0.2735	2.44518e-05	8.64975e-05
SLC25A10	294.49	2.0622	0.5758	2.44843e-05	8.6587e-05
ACOT11	74.303	1.5295	0.4132	2.45123e-05	8.66655e-05
RPLP0P9	697.108	1.0773	0.2797	2.49298e-05	8.80571e-05
C20orf27	178.07	1.2503	0.3311	2.55005e-05	8.98149e-05
CYB5R2	31.824	1.4538	0.3907	2.55692e-05	9.00354e-05
PHLDB1	581.591	1.0044	0.2593	2.57574e-05	9.05733e-05
SF3A2	44.507	1.7496	0.481	2.5858e-05	9.08788e-05
FAM193B	54.226	1.1049	0.2888	2.62559e-05	9.21454e-05
GBP3	33.37	1.3786	0.3677	2.64171e-05	9.2645e-05
TP53I11	24.81	1.4779	0.3988	2.72108e-05	9.51797e-05
PET100	108.088	1.2652	0.3373	2.74285e-05	9.58049e-05
NBPF1	75.745	1.0321	0.2683	2.77931e-05	9.68261e-05
MAP3K6	125.223	1.155	0.3044	2.7834e-05	9.69461e-05
ATG2A	71.456	1.3517	0.3633	2.79119e-05	9.71945e-05
WDR18	100.672	1.4212	0.3844	2.79713e-05	9.73781e-05
ADGRB2	42.888	1.7518	0.4848	2.84923e-05	9.90749e-05
H3C13	158.691	2.7216	0.7872	2.85043e-05	9.90933e-05
MICAL1	155.522	1.2369	0.3294	2.85616e-05	9.92691e-05
RPL19P9	542.814	1.0875	0.2852	2.87271e-05	9.97269e-05
RPLP2	2188.03	1.1895	0.3154	2.88072e-05	9.99593e-05
MAP2K7	71.787	1.2285	0.3279	3.00113e-05	0.000103843
GHDC	150.09	1.0869	0.286	3.0042e-05	0.000103925
SH3BP1	121.364	1.0957	0.2887	3.03578e-05	0.000104821
LOC101928465	22.301	1.6963	0.4689	3.07133e-05	0.000105899
THEM6	67.993	1.6431	0.4549	3.07757e-05	0.000106065
CCDC144NL-AS1	68.218	1.083	0.2852	3.08081e-05	0.000106127
CYHR1	119.499	1.3527	0.3679	3.28757e-05	0.000112776
ABHD14A	56.207	1.3059	0.3536	3.32124e-05	0.000113878
MRGPRX4	17.813	2.0932	0.5917	3.3511e-05	0.000114768
PCSK7	186.317	1.1876	0.3181	3.37083e-05	0.000115283
DOHH	43.004	1.918	0.5441	3.38863e-05	0.000115758
H3C12	377.342	1.2734	0.3448	3.42709e-05	0.000116921
TM4SF19	14.16	1.9372	0.5403	3.42744e-05	0.000116921
GNPTG	314.943	1.0051	0.2639	3.45639e-05	0.0001178
BAIAP2	158.289	1.1562	0.3099	3.51028e-05	0.000119498
LOC105377329	40.722	1.1148	0.2969	3.56723e-05	0.000121381
ZNF213-AS1	21.368	1.5301	0.4227	3.58292e-05	0.000121859
MOSPD3	29.123	1.3327	0.3631	3.5894e-05	0.000121995
CYP26A1	25.398	1.4007	0.3813	3.63472e-05	0.00012328
RPS14P3	101.584	1.1418	0.3066	3.64451e-05	0.000123526
SCAMP4	94.874	1.1396	0.3058	3.73255e-05	0.000126279
PAK4	99.377	1.2446	0.3379	3.74949e-05	0.000126742
DMAP1	97.355	1.06	0.2822	3.78122e-05	0.000127779
RPL13P5	30.499	1.3155	0.3589	3.82508e-05	0.000129083
WDR90	35.487	1.8614	0.5314	3.8262e-05	0.000129092
RPL13P12	2543.92	1.0115	0.2684	3.8277e-05	0.000129113
H4C13	554.173	1.3427	0.3693	3.89734e-05	0.000131132
RHBDF2	56.444	1.5652	0.4387	3.96288e-05	0.000133094
RPS28	147.271	1.27	0.3475	4.03037e-05	0.000134992
TNK1	47.739	1.0011	0.2661	4.04116e-05	0.000135292
CLUH	554.269	1.331	0.3665	4.04917e-05	0.00013553
LSM7	286.007	1.2407	0.339	4.1175e-05	0.000137536
PICK1	343.041	1.0501	0.2808	4.15e-05	0.000138559
PDZD4	78.216	1.3959	0.388	4.1989e-05	0.000140096
CXXC1	263.647	1.0956	0.296	4.3604e-05	0.00014483
TTLL12	388.326	1.151	0.3128	4.38653e-05	0.000145567
ENGASE	95.328	1.2674	0.3493	4.41075e-05	0.000146337
TUBA3FP	28.43	1.4002	0.3899	4.44354e-05	0.000147227
POLM	95.341	1.0615	0.2862	4.4698e-05	0.000148063
KATNB1	259.727	1.3076	0.3621	4.48554e-05	0.000148518
H3C7	1311.34	2.0398	0.5971	4.51716e-05	0.000149531
H2BC9	2490.55	1.1116	0.3016	4.53414e-05	0.000150026
LOC105374497	96.153	1.0538	0.2844	4.64821e-05	0.000153389
LINC02289	47.057	1.0151	0.273	4.8439e-05	0.000159275
GAS2L1	83.052	1.191	0.3281	4.85362e-05	0.000159472
LURAP1L-AS1	29.189	1.7288	0.4959	4.9142e-05	0.000161228
ATAD3A	193.614	1.4297	0.4034	4.92411e-05	0.000161517
JCAD	36.763	1.195	0.3286	5.0421e-05	0.000164728
PITPNA-AS1	40.092	1.2365	0.3432	5.07158e-05	0.000165581
HOXA6	20.768	1.596	0.4562	5.09375e-05	0.000166194
LOC105375368	16.501	1.6692	0.4763	5.10884e-05	0.00016665
H2BC8	3517.43	1.0726	0.2936	5.15092e-05	0.000167837
CLIC2	23.152	1.7237	0.4961	5.1685e-05	0.000168373
LAMTOR2	372.927	1.0775	0.2941	5.18559e-05	0.000168855
BAK1P1	81.009	1.3442	0.3782	5.23179e-05	0.000170284
RAB11B	33.399	1.5787	0.4528	5.28934e-05	0.000171854
CDT1	119.484	1.4048	0.398	5.36435e-05	0.0001741
ENKD1	56.948	1.3125	0.3686	5.37087e-05	0.000174234
CYYR1	17.286	2.1753	0.6333	5.52053e-05	0.000178775
LOC105371267	24.216	1.4631	0.4155	5.53345e-05	0.000179115
EPN1	202.482	1.2546	0.3511	5.55758e-05	0.00017973
ISOC2	260.606	1.5407	0.4437	5.61582e-05	0.000181423
RPL27P4	28.829	1.4411	0.4112	5.69386e-05	0.000183663
MYO18A	1055.6	1.025	0.2799	5.71716e-05	0.000184253
MDGA1	22.7	1.6047	0.4631	5.81503e-05	0.000187244
LZTS3	31.452	1.2434	0.3482	5.87745e-05	0.0001888
DYSF	16.51	1.8654	0.5479	5.94425e-05	0.000190738
TPRN	42.84	1.4783	0.4253	5.96882e-05	0.000191443
LONRF3	60.999	1.1312	0.314	6.06128e-05	0.000194156
CHCHD2P6	144.565	1.1678	0.3261	6.11182e-05	0.00019552
RRP9	310.109	1.0677	0.2946	6.17856e-05	0.000197475
PPP1R16A	36.832	1.8775	0.5587	6.24181e-05	0.000199333
JMJD7	37.361	1.283	0.3633	6.36579e-05	0.000202765
TM4SF1-AS1	13.157	2.0793	0.6116	6.43636e-05	0.000204893
LINC01752	15.144	2.3892	0.7167	6.4908e-05	0.000206413
LOC105372988	35.647	1.1453	0.3202	6.53137e-05	0.000207636
GRINA	432.081	1.1868	0.3338	6.56393e-05	0.000208447
RNU5E-1	860.992	1.1958	0.3368	6.57642e-05	0.000208753
LOC105372529	72.968	1.0789	0.2997	6.59948e-05	0.000209395
LINC02625	19.664	1.6874	0.4935	6.69217e-05	0.000212062
LOC105369647	55.304	1.2086	0.3415	6.7116e-05	0.000212541
RPS5	3354.26	1.5172	0.4443	6.91399e-05	0.000218528
RN7SL128P	51.04	1.2591	0.3587	6.92563e-05	0.000218803
MPST	123.738	1.4045	0.4064	6.99258e-05	0.000220634
PPP1R14BP3	412.411	1.0454	0.2904	7.01892e-05	0.000221418
TMEM160	28.68	2.1698	0.6634	7.07232e-05	0.000222959
ROBO3	28.444	1.3165	0.3766	7.12021e-05	0.000224373
ZNF219	67.034	1.2624	0.3604	7.1465e-05	0.000224961
ANKDD1A	26.892	1.4767	0.4302	7.19205e-05	0.000226347
PXN-AS1	47.99	1.2033	0.3429	7.47772e-05	0.000234189
CTU1	44.914	1.21	0.3447	7.48563e-05	0.000234337
LINC01605	15.412	1.6209	0.4758	7.51486e-05	0.000235152
MIRLET7BHG	40.079	1.4544	0.4249	7.54109e-05	0.000235823
NUDT16L1	190.27	1.1396	0.3225	7.69753e-05	0.000240307
MAPRE3	214.351	1.14	0.3238	8.12488e-05	0.000252049
ZNF710	90.009	1.1183	0.3177	8.38781e-05	0.000259388
H4-16	762.598	1.9108	0.5851	8.43125e-05	0.000260676
REXO1	44.608	1.3704	0.4023	8.75268e-05	0.000269822
NGFR	125.222	1.145	0.3279	8.80417e-05	0.00027124
MCM5	1378.21	1.0005	0.281	8.84461e-05	0.000272372
RASL10B	52.459	1.0051	0.2829	8.85433e-05	0.000272614
SPIRE2	37.262	1.5765	0.4725	8.95339e-05	0.000275262
YDJC	74.876	1.2154	0.3517	8.97449e-05	0.000275796
LRRC45	75.37	1.364	0.4015	9.07151e-05	0.000278414
NELFA	89.854	1.2301	0.3572	9.20121e-05	0.000282117
ARFRP1	240.895	1.2086	0.3501	9.2115e-05	0.000282315
BOP1	216.609	2.0161	0.6282	9.34144e-05	0.000286
TESK1	44.683	1.5196	0.456	9.51936e-05	0.000291025
RRP7BP	105.851	1.064	0.3037	9.6327e-05	0.000294124
SLC19A1	182.175	1.0597	0.3022	9.70377e-05	0.00029611
KLF16	64.355	1.2177	0.3543	9.70712e-05	0.000296151
RPL3P7	53.658	1.3634	0.4038	9.73321e-05	0.00029685
COL27A1	56.732	1.264	0.3704	0.000100041	0.000304205
PDLIM2	64.199	1.566	0.4744	0.000100191	0.000304535
RPS29P18	726.663	1.1764	0.3418	0.000100311	0.000304838
G0S2	31.815	1.5574	0.4698	0.000101149	0.000307257
LINC01094	20.558	1.5148	0.453	0.000101395	0.000307941
NLRC5	33.058	1.2115	0.3532	0.000101564	0.000308265
NUAK2	20.049	1.5872	0.4782	0.000101749	0.000308698
RNPEPL1	86.59	1.28	0.377	0.000102956	0.000312232
H2BC18	1632.88	1.02	0.2921	0.000108566	0.000328503
AGRN	84.95	1.4647	0.4432	0.000111636	0.000337031
MRPL23	19.98	1.9614	0.617	0.000112025	0.000338137
UCN2	24.259	1.8415	0.5752	0.000112473	0.000339281
TXNDC5	126.795	1.2734	0.3779	0.000112884	0.000340453
FHL3	61.849	1.054	0.3039	0.000114068	0.000343847
SSUH2	17.457	1.6585	0.5066	0.00011422	0.000344199
ATAD3B	699.201	1.0569	0.3051	0.000114313	0.000344408
KRT80	29.689	1.2071	0.3545	0.000115247	0.000347154
OFCC1	52.756	1.1474	0.3374	0.000119954	0.000359974
HSF4	24.632	1.99	0.6336	0.00012287	0.000368065
CH17-340M24.3	57.315	1.0338	0.2995	0.000122888	0.000368065
TUT1	124.037	1.0657	0.3106	0.000125438	0.000374637
SCARNA12	3227.38	1.6228	0.5072	0.000128406	0.000382804
RAB11B-AS1	30.182	1.3376	0.4038	0.000129407	0.000385401
NAGS	29.563	1.2694	0.3813	0.00013375	0.000397052
TMEM134	22.135	1.9455	0.6228	0.000133889	0.000397386
CCDC71	120.219	1.2497	0.377	0.000140418	0.000414677
TAMALIN	273.287	1.0283	0.3019	0.000146608	0.000431748
TAX1BP3	100.704	1.001	0.293	0.000147961	0.000435557
FAM86DP	47.688	1.0875	0.322	0.000147991	0.000435558
B9D2	39.146	1.2981	0.3959	0.000148022	0.000435563
CABYR	42.027	1.1613	0.3471	0.000148555	0.000436695
ARVCF	29.601	1.4962	0.466	0.000150193	0.000441028
KLHL26	50.067	1.0585	0.3131	0.000152987	0.000447763
CTDSP1	325.472	1.0341	0.3046	0.000153647	0.000449427
ARHGAP45	39.578	1.8204	0.5867	0.000153789	0.000449752
LOC105373465	12.851	1.7906	0.5635	0.000155902	0.000454917
GEM	51.357	1.1576	0.3484	0.000159182	0.000463869
CLASRP	122.825	1.3738	0.4253	0.000159564	0.000464798
LOC105373682	15.574	1.9625	0.6335	0.000167154	0.00048509
DMWD	86.522	1.0838	0.3243	0.000169866	0.000492572
ANTKMT	35.164	2.1548	0.719	0.000170032	0.000492957
PSMC3P1	16.023	1.506	0.4745	0.000177652	0.000512128
PTGS1	34.114	1.2166	0.3724	0.000180572	0.000519641
WDR24	56.555	1.5842	0.5078	0.00018176	0.000522541
RPL8P3	27.614	1.5094	0.4802	0.000185696	0.000532508
MPV17L2	112.274	1.1858	0.3634	0.000186216	0.000533689
SMTN	163.689	1.2294	0.3794	0.000187848	0.000537948
SLC25A29	116.187	1.0824	0.3273	0.000190279	0.000544275
TRAPPC6A	45.604	1.4003	0.4419	0.000190513	0.000544839
PRR5	34.772	1.3701	0.4314	0.000194069	0.000554151
ACTBP2	33.684	1.3315	0.417	0.000195449	0.000557767
TMEM104	192.797	1.0078	0.3025	0.000197581	0.00056298
OSBPL5	33.257	1.4601	0.4653	0.00019804	0.000564179
MMP9	24.095	1.2799	0.3991	0.000201803	0.000574344
PPP1R35	78.675	1.6047	0.5219	0.000202022	0.000574858
TBL3	124.594	2.231	0.7658	0.000207176	0.000588049
HGH1	132.93	1.2473	0.3898	0.000209818	0.000594745
PLXDC1	34.544	1.2067	0.3743	0.000210966	0.000597885
KYAT1	62.518	1.0516	0.3198	0.000213512	0.000603827
TBC1D17	73.543	1.0538	0.3207	0.000214017	0.000605022
LOC101927476	50.459	1.0439	0.3174	0.000222803	0.000627095
HOMER3	65.587	1.3207	0.4195	0.000225445	0.000633808
PITPNM1	34.498	2.0038	0.6821	0.000226658	0.000636489
ARRDC1	37.355	1.4185	0.4575	0.000233246	0.000652504
[truncated: 148 more rows]

## Sheet: DEG_dn1
MM27 Downregulated DEGs Vol. + Aur. vs DMSO| log2FC < -1
Total genes: 629 | Sorted by adjusted P-value
Gene	Base Mean	log2 Fold Change	lfcSE	P-value	Adjusted P-value
CHL1	6730.25	-2.0079	0.102	2.76775e-87	5.10442e-84
MOXD1	4981.53	-1.3491	0.0726	7.07477e-78	8.02932e-75
KIF20A	2194.05	-1.8369	0.1041	1.19467e-70	1.10164e-67
GPM6B	3626.32	-1.77	0.1031	5.64937e-67	4.38688e-64
NREP	867.76	-1.5348	0.0902	1.03063e-65	6.91178e-63
HERPUD1	2654.11	-1.0467	0.0626	1.89049e-63	1.11569e-60
NALCN	719.674	-1.637	0.1019	6.4274e-59	3.05903e-56
FGL2	709.879	-3.5664	0.2237	1.84042e-58	8.22834e-56
CENPF	17403.1	-1.9236	0.1219	2.98155e-57	1.25685e-54
UGT8	1461.32	-1.6987	0.1082	1.65594e-56	6.60317e-54
P2RX7	758.885	-2.5022	0.1608	1.05672e-55	4.10284e-53
MANF	2586.89	-1.1476	0.074	5.48333e-55	2.07439e-52
ST3GAL5	1903.95	-1.3627	0.0882	1.37258e-54	5.06275e-52
LRP2	1341.19	-2.765	0.18	2.18897e-54	7.87708e-52
SLC5A4	6856.81	-1.6693	0.1093	1.50871e-53	5.29989e-51
VEPH1	1418.37	-2.1003	0.1379	1.87168e-53	6.42203e-51
TYR	10167.9	-1.2009	0.0788	4.42276e-53	1.48303e-50
DCT	242897	-2.2194	0.1495	5.91096e-51	1.74421e-48
FSTL1	7355	-1.1102	0.0751	2.58028e-50	7.32105e-48
LMNB1	2859.09	-1.0157	0.0708	3.61466e-47	9.35626e-45
PLP1	40691.6	-1.1015	0.0791	6.98061e-45	1.68839e-42
CDH6	767.095	-1.8176	0.1336	4.0201e-43	9.26759e-41
YPEL2	1067.46	-1.0769	0.0791	7.27939e-43	1.65231e-40
TOP2A	19315.2	-1.477	0.1097	2.32354e-42	5.11664e-40
STK32A	440.904	-2.8392	0.2119	4.4214e-42	9.59315e-40
HMGCR	6874.18	-1.3981	0.1057	8.56405e-41	1.77963e-38
FSTL5	2667.56	-1.346	0.1028	5.66013e-40	1.12851e-37
GAS2L3	5898.01	-1.2258	0.0946	3.72177e-39	7.03988e-37
PTPN13	4468.08	-1.5692	0.1231	4.10393e-38	7.38407e-36
C1orf21	2022.49	-1.3176	0.104	1.51827e-37	2.66673e-35
PAQR8	2749.04	-1.8365	0.1466	4.08196e-37	6.92245e-35
ERP27	239.652	-2.0796	0.166	5.7745e-37	9.68148e-35
GALNT3	878.329	-1.766	0.1415	1.10677e-36	1.79442e-34
HMGCS1	5359.91	-2.2386	0.1806	2.1285e-36	3.41346e-34
CENPA	655.811	-1.3886	0.1115	2.16857e-36	3.44034e-34
PDGFD	1501.98	-1.2019	0.0971	6.8201e-36	1.0592e-33
ST6GAL1	2455.1	-1.1183	0.0911	2.40758e-35	3.51697e-33
DOCK10	3301.99	-1.503	0.1224	2.84385e-35	4.07361e-33
EPHA3	6685.54	-1.2566	0.1045	4.1536e-34	5.62222e-32
PSAT1	2272.87	-1.0709	0.0888	4.2063e-34	5.64179e-32
SLC26A4	658.115	-1.7074	0.1437	1.58487e-33	2.05116e-31
BAALC	553.63	-1.5476	0.1302	1.86827e-33	2.39691e-31
PTPRZ1	2339.61	-2.085	0.1769	3.92754e-33	4.91075e-31
SORT1	5652.52	-1.0969	0.0923	4.46833e-33	5.53998e-31
MTURN	1781.16	-1.1514	0.0977	1.03713e-32	1.27515e-30
SLC1A3	358.343	-1.5297	0.1305	1.41252e-32	1.72233e-30
ROR1	965.01	-1.7083	0.146	1.46756e-32	1.77478e-30
ESRP1	651.673	-1.6093	0.1386	4.51888e-32	5.37673e-30
DLGAP5	3051.14	-1.5013	0.1296	6.54579e-32	7.66481e-30
LOC105373730	312.647	-1.6779	0.1457	1.47579e-31	1.70107e-29
GPM6A	8691.14	-1.2903	0.1118	1.58194e-31	1.8093e-29
SEMA6D	1550.85	-1.6283	0.1418	1.61712e-31	1.83531e-29
ENOX1	784.929	-1.0586	0.0929	1.1512e-30	1.26752e-28
GJB2	1449.93	-1.5646	0.1381	1.23394e-30	1.34856e-28
MEF2C	1230.92	-1.42	0.1261	3.18426e-30	3.45445e-28
LOXL4	1853.53	-1.3992	0.1274	6.95071e-29	7.22189e-27
GPSM2	1209.59	-1.2158	0.1107	8.54822e-29	8.81961e-27
HMGB3	1543.81	-1.1206	0.1026	1.96682e-28	2.00128e-26
PMP2	4821.51	-1.4258	0.1316	3.36216e-28	3.37451e-26
COL14A1	3097.56	-1.2887	0.1189	4.00301e-28	3.96379e-26
SORL1	1208.35	-1.7878	0.1658	4.37539e-28	4.30363e-26
RIMS2	455.77	-1.7976	0.1676	8.99255e-28	8.61533e-26
INPP4B	9723.04	-1.1086	0.1034	1.00763e-27	9.52985e-26
SLC7A2	2707.18	-1.3189	0.1228	1.14556e-27	1.06972e-25
LRRC17	238.946	-2.0293	0.1921	4.00844e-27	3.65065e-25
SGCD	1730.37	-2.1024	0.2004	7.66632e-27	6.85509e-25
SQLE	5249.6	-1.2936	0.1225	7.78521e-27	6.91946e-25
PCDH9	1013.02	-1.1878	0.1126	1.05416e-26	9.25779e-25
GRIK3	446.284	-2.0884	0.1999	1.12295e-26	9.74587e-25
LRRTM4	105.971	-3.2709	0.3127	1.36689e-26	1.1725e-24
KAT2B	3435.71	-1.4182	0.1354	1.9723e-26	1.68205e-24
ARHGAP20	600.792	-1.6297	0.1564	2.80166e-26	2.32223e-24
LOC107984363	357.608	-1.8332	0.1764	2.85057e-26	2.34957e-24
UNC5C	671.513	-2.1884	0.2115	3.53068e-26	2.89398e-24
FAM102B	2199.96	-1.0771	0.1028	4.8161e-26	3.92579e-24
ELOVL2	3063.75	-1.029	0.0999	1.69514e-25	1.35924e-23
PWAR5	594.42	-1.2596	0.1227	1.71431e-25	1.36719e-23
CKAP2	5162.19	-1.3769	0.1349	2.78775e-25	2.18779e-23
LPCAT2	5119.95	-1.0571	0.1037	4.71498e-25	3.62216e-23
ARHGEF6	682.9	-1.1715	0.1151	4.80865e-25	3.65706e-23
MITF	6827.28	-1.16	0.1148	1.08515e-24	7.88682e-23
LRATD2	259.306	-1.3907	0.138	1.13204e-24	8.18734e-23
STARD4	1687.38	-1.2715	0.1262	1.33186e-24	9.53898e-23
ANGPTL7	87.641	-3.3832	0.3384	1.45576e-24	1.03261e-22
PIK3R3	131.537	-1.8703	0.1873	2.01836e-24	1.42483e-22
ARHGAP24	255.824	-1.6795	0.1686	2.7242e-24	1.91395e-22
HMCN1	6825.29	-1.8192	0.1838	4.49331e-24	3.11241e-22
ELOVL6	534.779	-2.055	0.2089	7.32821e-24	5.00558e-22
FGFBP3	74.645	-2.722	0.2766	7.76767e-24	5.25707e-22
TMOD2	5057.91	-1.229	0.1242	7.91203e-24	5.33032e-22
ARL6IP1	9121.59	-1.053	0.1066	1.06274e-23	7.03121e-22
TNIK	1533.47	-1.34	0.1361	1.14433e-23	7.50375e-22
TPX2	3615.22	-1.3303	0.1352	1.26223e-23	8.16797e-22
CYP2U1	860.724	-1.1507	0.1171	1.90109e-23	1.209e-21
NKAIN3	270.904	-2.3836	0.2451	1.89335e-23	1.209e-21
STX7	5889.28	-1.1222	0.1143	2.05545e-23	1.30155e-21
ETS1	4520.4	-1.1327	0.1156	2.17823e-23	1.3734e-21
NRG3	199.697	-1.9813	0.2045	3.50822e-23	2.18398e-21
GHR	1795.23	-1.0639	0.1093	5.0242e-23	3.10155e-21
ABCB5	1047.84	-2.3119	0.2414	7.68447e-23	4.72403e-21
ST8SIA1	797.004	-1.483	0.154	8.8465e-23	5.39344e-21
IGSF11	1691.86	-1.1544	0.1204	1.78354e-22	1.04838e-20
UGDH	2711.54	-1.0248	0.1071	2.6881e-22	1.5553e-20
SLC5A1	75.364	-3.217	0.3403	4.09969e-22	2.3175e-20
HTR2B	111.533	-2.4642	0.2642	1.02802e-21	5.63843e-20
LOC105378138	192.661	-1.7329	0.1855	1.16496e-21	6.31707e-20
MSMO1	4734.31	-1.2321	0.1314	1.16888e-21	6.31707e-20
LGR4	1243.26	-1.142	0.1219	1.37856e-21	7.37572e-20
NCAM2	400.602	-1.2989	0.1392	1.76844e-21	9.31844e-20
ADAMTS9	734.816	-1.1758	0.126	2.04551e-21	1.05893e-19
FREM2	4075.4	-1.6352	0.1771	3.19342e-21	1.6303e-19
LOC105375436	1545.68	-1.3801	0.1495	4.36279e-21	2.19688e-19
LRCH2	640.775	-1.7358	0.1891	4.76979e-21	2.37748e-19
CCDC146	376.239	-1.5095	0.1645	6.6301e-21	3.21778e-19
MMP16	3116.36	-1.3048	0.1421	6.8985e-21	3.33707e-19
FGD4	3194.91	-1.218	0.1338	1.43984e-20	6.80233e-19
FRG2DP	166.861	-1.8287	0.2025	1.82293e-20	8.48437e-19
MYEF2	2555.16	-1.2254	0.1357	2.74091e-20	1.25928e-18
PCDH18	183.252	-1.8871	0.2102	2.81216e-20	1.28454e-18
PLCB1	1746.3	-1.0023	0.1109	4.06008e-20	1.82629e-18
GNG2	5868.41	-1.0839	0.1201	4.08708e-20	1.83285e-18
KCNIP1	184.467	-1.3261	0.1489	9.58838e-20	4.19783e-18
CXADR	451.149	-1.7422	0.1971	1.08783e-19	4.7067e-18
KCNJ13	109.137	-2.3464	0.2666	1.27473e-19	5.42001e-18
C2orf88	188.055	-1.7575	0.2005	2.13989e-19	8.99484e-18
PDCD4	812.091	-1.272	0.1445	2.35468e-19	9.84164e-18
CCNA2	4126.18	-1.1364	0.129	2.59851e-19	1.07996e-17
TRIM13	1789.5	-1.0881	0.1235	2.72978e-19	1.12816e-17
MGAT4A	1774.14	-1.0607	0.1217	6.69227e-19	2.66139e-17
IRF4	1755.51	-1.1559	0.1333	8.6399e-19	3.40837e-17
CYP51A1	3655.95	-1.0957	0.1272	1.61861e-18	6.21899e-17
SLC4A7	2365.48	-1.1112	0.1301	2.74933e-18	1.03743e-16
B3GALT1	662.542	-1.1297	0.1335	5.72497e-18	2.11166e-16
KIT	499.638	-1.7878	0.2135	5.83924e-18	2.14843e-16
ATP7A	3017.73	-1.0786	0.1285	1.15076e-17	4.15118e-16
CPM	807.344	-1.2115	0.145	1.24422e-17	4.45562e-16
ENPP2	314.069	-1.3628	0.1636	1.25578e-17	4.4753e-16
ASPM	5343.3	-1.2431	0.1491	1.46223e-17	5.18598e-16
PLPPR5	82.842	-2.0718	0.2506	1.53617e-17	5.42216e-16
REV3L	5063.51	-1.4063	0.1701	1.80262e-17	6.30233e-16
TRIM63	197.616	-1.8091	0.2197	1.85006e-17	6.45291e-16
KCNK2	227.45	-1.5842	0.1931	2.82461e-17	9.65963e-16
E2F8	199.85	-1.7792	0.2172	2.81804e-17	9.65963e-16
LOC105369151	112.936	-2.0548	0.2513	2.97508e-17	1.01139e-15
SLCO5A1	155.431	-1.8203	0.2225	3.19824e-17	1.07979e-15
CLCN5	3651.71	-1.1303	0.1374	3.54472e-17	1.19404e-15
AASS	1129.24	-1.2017	0.1459	3.69756e-17	1.23986e-15
PIK3CG	537.432	-1.0076	0.1223	4.48351e-17	1.47986e-15
INSIG1	4177.3	-1.0944	0.1332	4.67709e-17	1.54031e-15
MAP2K6	754.139	-1.4173	0.1739	5.39347e-17	1.76052e-15
SETDB2	588.62	-1.1787	0.1442	6.12549e-17	1.99065e-15
GLDC	88.199	-2.0163	0.2501	8.18935e-17	2.63237e-15
ABCA8	581.981	-1.1803	0.1451	8.64293e-17	2.76611e-15
TCF4	1199.58	-1.121	0.1382	1.07227e-16	3.38038e-15
RAB27A	2056.53	-1.0764	0.1332	1.50323e-16	4.61096e-15
CCNG2	417.432	-1.75	0.2196	1.69196e-16	5.15769e-15
HAS2	498.665	-1.0526	0.1309	2.17193e-16	6.51313e-15
ANK2	1849.92	-1.0001	0.1244	2.24212e-16	6.66939e-15
SERTM2	67.121	-3.6618	0.464	2.3425e-16	6.95397e-15
RPS6KA5	528.726	-1.0453	0.1308	3.39103e-16	9.84866e-15
SLC12A2	3071.62	-1.2751	0.1608	3.75949e-16	1.08974e-14
PRTG	559.525	-1.2717	0.1603	3.85168e-16	1.11427e-14
GPR85	309.594	-1.4425	0.1829	4.26634e-16	1.22701e-14
GFRA1	299.874	-1.6285	0.2074	4.86239e-16	1.39031e-14
NEURL1B	42.195	-2.9308	0.3768	9.13454e-16	2.54766e-14
CERT1	2591.68	-1.2731	0.1628	9.16919e-16	2.54852e-14
FAM83D	906.729	-1.0149	0.1295	1.20527e-15	3.29917e-14
KLHL24	1489.21	-1.0655	0.1367	1.53385e-15	4.16767e-14
SCD	14301.2	-1.6284	0.212	1.71439e-15	4.63262e-14
MICAL2	346.365	-1.4166	0.1836	1.80891e-15	4.85248e-14
SLC26A2	11746.9	-1.054	0.1356	1.83554e-15	4.91498e-14
SEMA3D	396.771	-1.4521	0.189	2.23414e-15	5.90727e-14
CUBN	541.599	-1.1533	0.1501	3.2535e-15	8.43623e-14
LSAMP	3220.54	-1.0055	0.1309	3.24895e-15	8.43623e-14
ADAM22	144.158	-1.3391	0.175	3.61347e-15	9.33681e-14
PLCXD3	49.696	-2.9943	0.3979	5.7999e-15	1.46277e-13
KCTD12	3875.73	-1.2402	0.1637	6.1239e-15	1.53922e-13
UBR5	3513.69	-1.1348	0.1506	1.0416e-14	2.55278e-13
STARD4-AS1	62.379	-2.1592	0.292	1.48668e-14	3.60765e-13
CRISPLD1	1356.45	-1.0475	0.1402	1.83648e-14	4.39147e-13
HSPA5	8559.72	-1.7402	0.2364	1.89745e-14	4.51532e-13
LHFPL3-AS1	3165.15	-1.0182	0.1362	2.03765e-14	4.84115e-13
RASGRP1	377.095	-1.4742	0.2001	2.38359e-14	5.63582e-13
BNC2	1984.05	-1.5831	0.2155	2.46969e-14	5.82073e-13
LRBA	2241.39	-1.1329	0.1529	2.7382e-14	6.42281e-13
ANKRD50	2532.89	-1.5159	0.2069	2.80326e-14	6.56497e-13
HOOK1	137.145	-2.0895	0.2866	2.86528e-14	6.69957e-13
MOB3B	739.015	-1.6225	0.2225	3.92729e-14	8.99739e-13
FABP7	1988.57	-1.2755	0.1744	4.06318e-14	9.2799e-13
UBL3	18119.6	-1.1913	0.1631	6.42129e-14	1.43981e-12
DYNC2H1	1188.59	-1.1672	0.1604	6.52723e-14	1.46135e-12
ANK3	881.053	-1.1006	0.1509	6.65402e-14	1.48298e-12
TMTC2	3140.41	-1.2929	0.1786	7.51279e-14	1.65686e-12
PIGAP1	42.762	-2.6891	0.3753	7.81741e-14	1.71634e-12
CCDC26	56.329	-2.1649	0.3008	7.87915e-14	1.72476e-12
BANCR	270.282	-1.3491	0.1868	8.02877e-14	1.75491e-12
SMARCA1	2029.86	-1.0505	0.1453	9.6873e-14	2.0957e-12
GPR155	862.934	-1.0312	0.1425	1.21835e-13	2.59014e-12
SMCO3	84.339	-1.9245	0.2706	1.28539e-13	2.7209e-12
NLGN1	2249.47	-1.0377	0.1441	1.40035e-13	2.95576e-12
DAB2	6227.12	-1.1523	0.1607	1.41853e-13	2.98986e-12
SLITRK2	1707.92	-1.6906	0.2395	1.8561e-13	3.8462e-12
MBNL3	1518.56	-1.4846	0.2096	1.86358e-13	3.85627e-12
TAF7L	55.641	-2.2673	0.3231	2.22304e-13	4.55538e-12
TMEM170B	1267.11	-1.4134	0.2004	2.48213e-13	5.07221e-12
BRWD3	2059.82	-1.1574	0.1642	3.38612e-13	6.78788e-12
PPP1R9A	609.809	-1.0181	0.1446	4.80394e-13	9.43772e-12
PTTG1	1791.14	-1.0434	0.1486	5.34384e-13	1.04152e-11
STK32A-AS1	63.558	-2.1877	0.3177	5.69064e-13	1.10473e-11
GRB14	81.509	-1.9281	0.2796	5.82844e-13	1.13e-11
RAD21	6271.23	-1.0532	0.1506	6.29663e-13	1.2128e-11
GDF11	2167.94	-1.0145	0.1453	7.34021e-13	1.392e-11
MPPED2	306.094	-1.6196	0.236	8.17892e-13	1.54312e-11
CYP51A1P2	440.627	-1.0976	0.1581	8.81243e-13	1.65208e-11
SPRY1	279.623	-1.2122	0.176	1.0593e-12	1.94631e-11
ZNF704	2061.45	-1.1375	0.1654	1.22046e-12	2.21758e-11
ZMAT3	6649.73	-1.1115	0.1617	1.33806e-12	2.4223e-11
TP53INP1	1030.56	-1.2568	0.1836	1.34649e-12	2.43457e-11
E2F5	92.178	-1.4365	0.2106	1.48144e-12	2.64615e-11
SOX2-OT	80.78	-1.9725	0.2934	1.77943e-12	3.12545e-11
LINC00518	386.019	-1.0179	0.1489	1.89739e-12	3.32472e-11
RUNX1	753.027	-2.2923	0.3443	2.10885e-12	3.65616e-11
CELF2	2066.34	-1.2461	0.1843	2.26437e-12	3.88923e-11
HNRNPA1	2050.01	-1.2476	0.1849	2.62999e-12	4.45497e-11
AGL	1707.76	-1.1887	0.1762	2.9037e-12	4.87691e-11
CHST9	52.838	-2.0091	0.3015	3.13998e-12	5.23003e-11
PLEKHH1	799.802	-1.1639	0.1728	3.25711e-12	5.41164e-11
RLBP1	250.363	-1.1341	0.1691	4.05395e-12	6.63104e-11
CYP51A1P1	209.539	-1.056	0.157	4.39982e-12	7.1335e-11
SLC16A10	306.667	-1.0931	0.163	4.44589e-12	7.19239e-11
DPY19L2	209.806	-1.3841	0.2091	5.57313e-12	8.86055e-11
LINC00472	241.243	-1.0606	0.159	6.00528e-12	9.44893e-11
CYP7B1	521.711	-1.13	0.1702	6.66045e-12	1.0344e-10
SWAP70	258.186	-1.2275	0.1856	6.87159e-12	1.06272e-10
BCHE	2702.3	-1.0045	0.1502	7.02963e-12	1.08489e-10
GRIA4	60.127	-1.9155	0.2936	7.99441e-12	1.22354e-10
PLXNC1	1559.05	-1.2132	0.184	8.05398e-12	1.23138e-10
SYNE2	3458.27	-1.2034	0.1826	9.11128e-12	1.38158e-10
NFATC2	1511.4	-1.9485	0.3014	9.52391e-12	1.4353e-10
GNPTAB	7740.1	-1.0218	0.1552	1.11099e-11	1.65572e-10
PROKR1	60.011	-1.7232	0.2663	1.25105e-11	1.85135e-10
PGAP1	1407.24	-1.4869	0.2304	1.44156e-11	2.10999e-10
SESN3	12682.8	-1.2923	0.1991	1.46851e-11	2.14732e-10
VPS13A	1774.14	-1.1703	0.1802	1.57577e-11	2.28502e-10
ANKS1B	115.696	-1.3303	0.206	1.84436e-11	2.63936e-10
PWAR6	131.219	-1.66	0.2594	1.86247e-11	2.65496e-10
RASGRP3	67.312	-1.7445	0.2724	1.92615e-11	2.73517e-10
LOC101930275	61.519	-2.0847	0.3287	2.09374e-11	2.95325e-10
FAM120C	832.111	-1.087	0.168	2.1231e-11	2.99181e-10
IGFBP5	30211.8	-1.098	0.1702	2.32613e-11	3.2469e-10
FRMD4B	358.434	-1.1167	0.174	2.94073e-11	4.0398e-10
CDK19	1776.26	-1.1023	0.1718	2.99496e-11	4.10284e-10
LOC112268235	376.768	-1.0146	0.1581	3.56353e-11	4.80588e-10
PPP1R1C	112.548	-1.6359	0.2598	3.62245e-11	4.87642e-10
RTKN2	842.261	-1.0891	0.1711	4.09801e-11	5.44638e-10
TRIM48	42.926	-2.2355	0.3584	4.66512e-11	6.15646e-10
DNAJC3-DT	133.257	-1.1907	0.1891	6.01691e-11	7.78033e-10
CYSLTR2	692.263	-1.0864	0.1724	6.59315e-11	8.45138e-10
MTSS1	127.369	-1.7753	0.287	6.7258e-11	8.58412e-10
KCNJ10	232.956	-2.1232	0.3468	7.54772e-11	9.46931e-10
LINC01597	173.042	-1.0578	0.1683	7.94673e-11	9.90253e-10
MYH10	5486.42	-1.0432	0.1667	9.30791e-11	1.1492e-09
FAM81A	159.616	-1.0803	0.1739	1.26261e-10	1.52944e-09
LINC00641	481.234	-1.0758	0.1739	1.40211e-10	1.68322e-09
PAK3	33.101	-2.8814	0.4721	1.61103e-10	1.90306e-09
PODXL	1097.79	-1.0072	0.163	1.61976e-10	1.9103e-09
MACROD2	369.21	-1.0797	0.1765	2.12718e-10	2.44617e-09
DACT1	265.722	-1.0171	0.1664	2.50727e-10	2.84775e-09
PHLDA1	13193.6	-1.0795	0.1779	2.84479e-10	3.18936e-09
VAV3	240.156	-1.0015	0.1647	3.1962e-10	3.54562e-09
ARHGEF3	488.475	-1.0444	0.1729	3.63504e-10	3.99935e-09
KLF12	2854.24	-1.0327	0.1709	3.73829e-10	4.10378e-09
SOX6	1832.47	-1.2137	0.2039	4.7298e-10	5.06044e-09
CDH1	23.097	-3.0718	0.5225	5.07139e-10	5.38297e-09
LOC101929185	134.499	-1.2607	0.2123	5.27513e-10	5.5632e-09
MYO5C	344.131	-1.0825	0.1817	5.64417e-10	5.90752e-09
ART3	300.234	-1.0136	0.1693	5.95066e-10	6.20029e-09
ND5	4939.37	-1.2457	0.2134	9.20997e-10	9.16895e-09
B4GALT6	1330.94	-1.0999	0.1874	9.46213e-10	9.38201e-09
RNF150	658.29	-1.1238	0.1917	9.51964e-10	9.43269e-09
CFI	204.354	-1.2483	0.2151	1.15439e-09	1.12571e-08
FIGN	518.885	-1.4534	0.2536	1.35346e-09	1.30345e-08
SLITRK6	122.787	-1.3332	0.2315	1.41732e-09	1.35787e-08
KCNAB1	298.835	-1.3687	0.2387	1.46312e-09	1.3954e-08
ZC3H13	6830.23	-1.2717	0.2219	1.62663e-09	1.53155e-08
MFSD6	586.714	-1.2764	0.2234	1.82862e-09	1.70325e-08
NFIB	1459.41	-1.3554	0.2382	1.89259e-09	1.75397e-08
CNTN4	358.296	-1.0381	0.1805	2.16396e-09	1.97568e-08
RCAN2	133.774	-1.3281	0.2337	2.2269e-09	2.02938e-08
GLDCP1	43.293	-2.2784	0.4102	2.28307e-09	2.07416e-08
ADAMTS18	38.12	-1.9679	0.3526	2.7324e-09	2.42854e-08
SYDE2	249.259	-1.0915	0.1924	3.14048e-09	2.74494e-08
LINC01013	59.612	-1.6784	0.3015	3.21364e-09	2.80059e-08
ADCY1	1023.65	-1.3124	0.2345	3.44677e-09	2.98436e-08
ARHGAP6	228.296	-1.0019	0.1766	3.54184e-09	3.0595e-08
BMF	215.689	-1.1734	0.2089	3.75171e-09	3.22193e-08
BHLHE41	499.976	-1.3548	0.2461	5.62264e-09	4.63703e-08
NCR3LG1	480.066	-1.0694	0.1921	5.8443e-09	4.79688e-08
LOC107984294	72.737	-2.0491	0.3798	5.9607e-09	4.88579e-08
LOC107986148	58.285	-1.7671	0.3253	6.07745e-09	4.97043e-08
PEG10	865.207	-1.3218	0.2409	6.40219e-09	5.22193e-08
ZBED6	1572.58	-1.0261	0.1848	6.77817e-09	5.49479e-08
MKI67	3538.65	-2.5173	0.4751	7.22364e-09	5.82073e-08
NAV2	466.625	-2.0218	0.3781	7.31956e-09	5.89158e-08
ANTXR1	4737.86	-1.2781	0.2344	8.10061e-09	6.44315e-08
IL16	103.558	-1.2972	0.2391	9.48005e-09	7.43983e-08
NLGN3	67.322	-1.6808	0.314	9.91664e-09	7.73718e-08
CADPS	88.042	-1.2696	0.2344	1.07879e-08	8.35072e-08
ATRX	4579.71	-1.0431	0.1904	1.15789e-08	8.89768e-08
TEK	159.375	-1.0248	0.1875	1.17131e-08	8.98931e-08
ROBO1	1131.74	-1.0464	0.1919	1.17164e-08	8.98931e-08
LRRC8C	990.565	-1.1524	0.2125	1.20638e-08	9.22705e-08
LYST	3936.32	-1.0009	0.1822	1.20894e-08	9.24185e-08
KIAA1109	2413.1	-1.0814	0.1995	1.23787e-08	9.45319e-08
NCAM1	1370.99	-1.0357	0.1905	1.2629e-08	9.61942e-08
BCL2L11	601.51	-1.3119	0.2447	1.30525e-08	9.91127e-08
PCDHG@	602.432	-1.0189	0.1875	1.34823e-08	1.01852e-07
HPGD	432.636	-1.1591	0.2162	1.59824e-08	1.18673e-07
FAM117B	374.532	-1.5115	0.2866	1.65745e-08	1.22576e-07
SCDP1	152.453	-1.3279	0.25	1.70868e-08	1.26113e-07
WASF1	154.74	-1.4617	0.277	1.80198e-08	1.32074e-07
LOC112267931	86.478	-1.1659	0.2188	2.03954e-08	1.48014e-07
PEAK1	1670.36	-1.3436	0.2553	2.04243e-08	1.48079e-07
KCNQ5	332.144	-1.3263	0.2517	2.10442e-08	1.52199e-07
PARD3B	323.667	-1.0253	0.1918	2.20356e-08	1.58669e-07
TRIL	54.555	-1.4472	0.2764	2.39082e-08	1.70654e-07
OCA2	85.042	-1.3759	0.2626	2.55407e-08	1.81254e-07
MYB	42.378	-1.9075	0.3687	2.58639e-08	1.83283e-07
GPC4	201.739	-1.5282	0.2954	2.84971e-08	1.99547e-07
LOC112267915	45.081	-2.0501	0.4015	3.10199e-08	2.15678e-07
ATP2A2	8862.24	-1.1889	0.2275	3.17696e-08	2.20353e-07
RAPGEF4	89.429	-1.1288	0.2149	3.1842e-08	2.20562e-07
PDK3	6028.47	-1.0891	0.2077	3.3735e-08	2.32474e-07
LRRTM2	53.658	-1.91	0.3742	3.45532e-08	2.37668e-07
CLDN1	109.071	-1.3238	0.256	3.73102e-08	2.54298e-07
CNTN6	157.774	-1.1234	0.2152	3.73157e-08	2.54298e-07
GRIK2	2078.83	-1.2234	0.2361	3.77679e-08	2.57142e-07
IL17RD	73.02	-1.3869	0.2694	4.0527e-08	2.73655e-07
MAOB	172.969	-1.0535	0.2022	4.26609e-08	2.8636e-07
DUS4L-BCAP29	198.586	-1.0269	0.1966	4.34634e-08	2.91217e-07
PRKDC	11541.4	-1.0914	0.2113	4.71425e-08	3.13731e-07
INSC	85.855	-1.1805	0.2288	4.8849e-08	3.24064e-07
LOC389473	65.997	-1.4194	0.2811	6.64339e-08	4.28957e-07
COBLL1	657.171	-1.1212	0.2208	7.79085e-08	4.96099e-07
CDH7	89.585	-1.2685	0.2513	7.87321e-08	5.01127e-07
CTTNBP2	169.876	-1.1505	0.227	8.05902e-08	5.12071e-07
HMBOX1	1014.45	-1.4429	0.2896	8.29408e-08	5.24521e-07
CDK15	63.341	-1.262	0.2511	9.32557e-08	5.83996e-07
MYCBP2	5602.58	-1.0627	0.2095	9.41465e-08	5.88575e-07
KCNG3	154.202	-1.0092	0.1987	9.55491e-08	5.96333e-07
POSTN	688.983	-1.038	0.205	9.62466e-08	5.99925e-07
RFX3	352.967	-1.2136	0.2423	9.76354e-08	6.0791e-07
SPRY4	1150.3	-1.0475	0.2073	9.99185e-08	6.20453e-07
LOC107984316	194.26	-1.15	0.2288	1.0042e-07	6.23095e-07
MAMDC2	177.686	-1.0574	0.2094	1.0505e-07	6.49311e-07
LOC100288073	27.673	-3.0576	0.6316	1.0866e-07	6.70501e-07
TFAP2A	555.835	-1.8429	0.3803	1.14338e-07	7.01115e-07
TOX3	149.643	-1.6126	0.3329	1.43457e-07	8.61443e-07
FAM124A	146.6	-1.1075	0.223	1.44506e-07	8.66681e-07
MEX3A	226.792	-1.3005	0.2651	1.46875e-07	8.79104e-07
LOC101929749	73.65	-1.224	0.2495	1.78096e-07	1.04478e-06
FCGR2C	42.753	-1.4419	0.2971	1.79516e-07	1.05186e-06
PER3	345.212	-1.0259	0.2084	2.01704e-07	1.16384e-06
LINC02813	30.393	-1.8631	0.3921	2.17374e-07	1.24986e-06
ASPA	78.885	-1.2399	0.2555	2.20084e-07	1.26495e-06
TRDN	46.294	-2.2216	0.4739	2.21616e-07	1.27276e-06
ATP8	117.924	-1.2422	0.2572	2.39075e-07	1.36171e-06
WWTR1	10579.7	-1.0687	0.2199	2.59619e-07	1.46423e-06
PIK3CB	1083.71	-1.4574	0.3073	2.7149e-07	1.52187e-06
ITK	79.25	-1.0377	0.2142	3.12398e-07	1.72691e-06
CEP170P1	35.074	-1.5211	0.3212	3.14552e-07	1.73687e-06
KCNC2	28.467	-2.1395	0.4596	3.20839e-07	1.76959e-06
ATG12P2	72.877	-1.1375	0.237	3.40255e-07	1.86207e-06
TEAD1	9360.79	-1.0415	0.2181	4.20615e-07	2.24928e-06
SEMA6A	1136.91	-1.3803	0.2965	4.46894e-07	2.38118e-06
HELZ	3932.39	-1.0687	0.2254	4.56554e-07	2.42651e-06
NPY1R	60.966	-1.3541	0.2906	5.05261e-07	2.65857e-06
LATS1	1359.36	-1.0755	0.2301	6.36958e-07	3.28232e-06
TLE4	92.745	-1.0446	0.2235	7.11237e-07	3.61848e-06
MED12L	91.288	-1.3204	0.2888	7.44117e-07	3.76628e-06
ND2	1039.13	-1.5162	0.3372	8.09503e-07	4.061e-06
HMGB3P6	63.853	-1.3024	0.2849	8.22419e-07	4.11181e-06
LOC105377016	45.214	-1.573	0.3498	8.65451e-07	4.30218e-06
SYNPO2	52.181	-1.3331	0.2938	9.28581e-07	4.58971e-06
NIPBL	3003.39	-1.2834	0.2843	9.96782e-07	4.88426e-06
ZNF652	1960.4	-1.1517	0.2534	1.04179e-06	5.07615e-06
QSER1	3423.08	-1.318	0.2938	1.06445e-06	5.17118e-06
AKAP11	3661.22	-1.0426	0.2296	1.16587e-06	5.61951e-06
PALMD	19.273	-2.1377	0.4851	1.22292e-06	5.86573e-06
USH2A	52.851	-1.3218	0.2958	1.2258e-06	5.8757e-06
PLK1	326.351	-1.0607	0.2338	1.24743e-06	5.97162e-06
THBS1	47.339	-1.8239	0.419	1.25948e-06	6.02149e-06
CHRM3	59.083	-1.0998	0.2428	1.30986e-06	6.24011e-06
ZNF507	1536.02	-1.1594	0.258	1.3468e-06	6.39956e-06
LOC112268276	98.625	-1.0512	0.2328	1.46985e-06	6.91525e-06
TEX15	206.709	-1.0969	0.2442	1.47073e-06	6.91717e-06
FOLH1	46.429	-1.4055	0.3189	1.58495e-06	7.41184e-06
MOB1B	1647.07	-1.0466	0.2334	1.63988e-06	7.63725e-06
FHDC1	237.738	-1.0247	0.2295	1.88377e-06	8.65561e-06
WIPF1	1277.4	-1.0186	0.2287	1.89658e-06	8.70631e-06
FSIP2	67.381	-1.4016	0.3224	1.91542e-06	8.77915e-06
NAF1	280.651	-1.4491	0.335	1.93353e-06	8.84292e-06
SLC24A2	40.462	-1.3832	0.3171	2.04502e-06	9.3124e-06
N4BP2L2-IT2	84.519	-1.2958	0.2985	2.22992e-06	1.00489e-05
RDH12	66.274	-1.0878	0.2463	2.25911e-06	1.0165e-05
GAS5-AS1	64.49	-1.085	0.246	2.37001e-06	1.06154e-05
PKHD1	16.764	-2.5792	0.6073	2.55917e-06	1.13935e-05
NAV1	706.249	-1.4681	0.3459	2.70869e-06	1.2012e-05
MBTD1	460.718	-1.0298	0.235	2.72299e-06	1.20682e-05
ZNF326	1103.26	-1.0027	0.2285	2.76672e-06	1.22436e-05
TET1	807.133	-1.0061	0.2295	2.78904e-06	1.23276e-05
UBN2	885.833	-1.0419	0.239	2.96122e-06	1.30107e-05
EGFLAM	71.414	-1.0249	0.2342	2.96922e-06	1.30381e-05
DHX33	1306.65	-1.075	0.2478	3.03735e-06	1.33134e-05
RIPOR2	26.897	-1.8134	0.4344	3.25797e-06	1.42045e-05
MYO6	792.83	-1.0463	0.2416	3.33631e-06	1.4499e-05
MUC7	82.043	-2.1974	0.5406	3.37062e-06	1.46351e-05
PABPC1	2403.31	-1.2842	0.3027	3.4827e-06	1.50818e-05
PPARGC1B	283.64	-1.2562	0.2962	3.56292e-06	1.53931e-05
SV2C	29.758	-1.9321	0.4692	3.61555e-06	1.5587e-05
SCN1A	12.175	-3.1991	0.7553	3.80169e-06	1.62911e-05
DLEU7	121.321	-1.0021	0.2329	4.18326e-06	1.77356e-05
BPTF	1709.19	-1.1855	0.2808	4.27009e-06	1.80674e-05
LOC107986874	99.251	-1.1992	0.2842	4.35344e-06	1.83779e-05
ZFHX4	315.825	-1.3658	0.3295	4.71136e-06	1.97195e-05
MAST4	134.234	-1.2634	0.3031	4.87055e-06	2.03052e-05
TET3	645.279	-1.1557	0.2751	4.93509e-06	2.05568e-05
HNRNPD	1579.77	-1.2118	0.2905	5.17667e-06	2.14601e-05
SALL2	50.083	-1.4319	0.3483	5.22653e-06	2.16182e-05
LDB3	96.438	-1.45	0.3548	5.52962e-06	2.27444e-05
LOX	98.99	-1.0502	0.2491	5.71108e-06	2.34319e-05
LOC112268301	54.479	-1.3591	0.3307	6.04058e-06	2.45924e-05
LOC105373454	101.814	-1.2827	0.3132	6.66489e-06	2.69113e-05
ONECUT1	157.685	-1.6598	0.4167	6.79609e-06	2.74035e-05
SPCS2	224.128	-1.198	0.2917	6.96162e-06	2.80013e-05
OLFML2A	189.517	-1.179	0.2878	7.49265e-06	2.9926e-05
LOC105378512	58.754	-1.3394	0.3302	7.69726e-06	3.06685e-05
SEC63	1657.21	-1.1767	0.2892	8.53899e-06	3.36586e-05
LOC105370114	83.779	-1.0775	0.2626	8.8572e-06	3.47828e-05
NF1	4504.86	-1.1073	0.2697	8.89866e-06	3.49178e-05
MBTPS2	2065.18	-1.1309	0.2784	9.24187e-06	3.613e-05
PRRC2C	7252.19	-1.2241	0.3057	1.01134e-05	3.91325e-05
FBXL7	453.905	-1.2458	0.3114	1.01222e-05	3.91564e-05
LOC101928373	146.97	-1.0338	0.2531	1.0181e-05	3.93712e-05
KIAA0754	369.351	-1.113	0.2754	1.06393e-05	4.09744e-05
ADNP	3293.12	-1.1348	0.282	1.08367e-05	4.16692e-05
LRRN4CL	24.495	-1.6648	0.4284	1.13759e-05	4.34706e-05
SRGAP1	701.602	-1.2974	0.3292	1.19084e-05	4.52591e-05
IPW	143.937	-1.0347	0.2559	1.20717e-05	4.57857e-05
MARCHF1	103	-1.1283	0.2819	1.23249e-05	4.6674e-05
TNKS2	3578.84	-1.0167	0.2513	1.25886e-05	4.75384e-05
MIR4453HG	65.213	-1.1961	0.3018	1.35711e-05	5.08968e-05
PABIR2	1385.79	-1.2709	0.328	1.67024e-05	6.15145e-05
PPTC7	674.804	-1.0363	0.2617	1.67285e-05	6.15954e-05
KMT2E	1460.28	-1.094	0.2774	1.6734e-05	6.16002e-05
LOC105374972	19.336	-2.0544	0.5425	1.71763e-05	6.30082e-05
ELK4	2378.86	-1.0596	0.2683	1.81397e-05	6.6262e-05
HNRNPA3P6	492.986	-1.4426	0.381	1.85897e-05	6.77885e-05
LOC107985360	35.401	-1.2969	0.3361	1.86042e-05	6.78247e-05
YLPM1	975.892	-1.1478	0.2965	1.97715e-05	7.16378e-05
SON	5665.95	-1.0566	0.2709	2.11317e-05	7.60061e-05
GARNL3	74.571	-1.0804	0.2778	2.12755e-05	7.64675e-05
ZNF618	182.222	-1.2753	0.3356	2.21658e-05	7.93195e-05
ZFC3H1	871.375	-1.0453	0.2691	2.24349e-05	8.01075e-05
CACNB4	83.29	-1.3047	0.3445	2.27158e-05	8.10713e-05
PPP2R2A	1732.18	-1.1082	0.2875	2.3055e-05	8.2143e-05
PTTG3P	59.564	-1.3175	0.3478	2.35002e-05	8.35473e-05
PPP2R5E	986.943	-1.0069	0.2593	2.39652e-05	8.49345e-05
HNRNPA3	2934.86	-1.7171	0.4727	2.51677e-05	8.87488e-05
HNRNPA1P4	49.91	-1.0738	0.279	2.61584e-05	9.18469e-05
ANP32B	278.667	-1.063	0.2775	2.77871e-05	9.68261e-05
ASXL2	1705.93	-1.1431	0.3022	2.88076e-05	9.99593e-05
SH2D1A	51.111	-1.2942	0.3474	3.06342e-05	0.000105676
LOC100129034	350.447	-1.0315	0.2706	3.0764e-05	0.00010605
HERC6	84.54	-1.1718	0.3125	3.17693e-05	0.000109336
TEX41	31.641	-1.5376	0.422	3.37514e-05	0.000115377
PROX1	22.251	-2.0121	0.5676	3.42606e-05	0.000116921
LOC107984328	31.95	-1.8175	0.5107	3.44412e-05	0.000117436
EDNRB-AS1	42.432	-1.2449	0.3367	3.63121e-05	0.000123189
LOC107985780	59.718	-1.3182	0.3609	3.83393e-05	0.000129272
AGMO	69.254	-1.1133	0.2987	3.84169e-05	0.000129407
TXLNB	33.962	-1.2002	0.3246	3.9369e-05	0.000132373
DPYD	57.859	-1.0728	0.287	4.03831e-05	0.000135227
UBE3AP2	65.121	-1.1468	0.3096	4.08186e-05	0.000136441
PROSER1	909.056	-1.3043	0.3605	4.24913e-05	0.00014158
NEPNP	33.412	-1.2442	0.3407	4.55168e-05	0.000150539
R3HDM1	603.018	-1.0607	0.2868	4.57171e-05	0.000151168
ND4	4230.89	-1.1297	0.3091	4.64639e-05	0.000153389
ZNF540	29.995	-1.398	0.3893	4.80065e-05	0.000157994
AUTS2	222.825	-1.137	0.3114	4.82847e-05	0.000158874
SEC63P1	196.458	-1.1914	0.3286	4.85055e-05	0.000159427
ACAN	173.781	-1.0659	0.2895	4.86209e-05	0.000159696
OMG	31.401	-1.4163	0.3966	4.989e-05	0.000163246
LINC00622	251.36	-1.0699	0.2926	5.24269e-05	0.000170564
CBX3P7	16.185	-1.9836	0.5746	5.24876e-05	0.000170686
ZNF605	64.82	-1.0547	0.288	5.50116e-05	0.000178187
PABPC1P4	53.001	-1.4247	0.4068	5.69681e-05	0.000183718
LOC105376001	21.545	-1.6986	0.4863	5.8022e-05	0.000186871
LINC01004	97.48	-1.22	0.3424	5.97122e-05	0.000191479
USF3	584.096	-1.024	0.283	6.55989e-05	0.000208408
LOC107986363	24.899	-1.6851	0.4952	7.06708e-05	0.000222842
ABCA9	109.096	-1.0457	0.2913	7.1344e-05	0.000224725
SCG3	121.003	-1.1272	0.317	7.14577e-05	0.000224961
PLAC4	107.028	-1.2143	0.3455	7.21777e-05	0.000227108
IGF1	33.401	-1.6318	0.4807	7.33096e-05	0.000230228
BICD1	1923.4	-1.0518	0.2955	8.01096e-05	0.000248881
LOC777650	61.637	-1.0032	0.2801	8.19357e-05	0.000254126
PLCL1	41.244	-1.5072	0.4447	8.23386e-05	0.000255161
HNRNPH3	806.655	-1.1689	0.335	8.31359e-05	0.00025747
STON1	138.099	-1.1196	0.3198	8.8734e-05	0.000273138
ERVMER34-1	36.616	-1.2297	0.3543	9.02601e-05	0.000277264
LOC112267866	32.585	-1.5875	0.4758	9.0729e-05	0.000278414
LOC102724945	17.692	-1.6827	0.5022	9.20895e-05	0.000282295
LINC02296	68.925	-1.3102	0.3866	9.85592e-05	0.000300009
PRLR	42.916	-1.4984	0.4538	0.000111507	0.000336713
ZNF667	31.011	-1.2564	0.3701	0.00011408	0.000343847
ITGB6	65.769	-1.0145	0.2918	0.000117334	0.000352935
FAM133A	24.675	-1.6136	0.4881	0.000118404	0.000355935
SMG7	763.004	-1.2495	0.3725	0.000119258	0.000358211
COL10A1	50.013	-1.1816	0.3504	0.000129347	0.000385298
INSYN2B	13.01	-2.0222	0.635	0.000133325	0.000395868
ATF7	441.137	-1.0577	0.3102	0.000133964	0.000397526
MALAT1	970.634	-1.0512	0.3078	0.000134777	0.000399618
SOS1	1235.35	-1.055	0.31	0.000137351	0.000406598
LOC102723340	20.339	-1.394	0.4215	0.000138074	0.000408653
LOC105378558	66.982	-1.0218	0.2989	0.000141864	0.000418611
FAT4	67.717	-1.4551	0.452	0.000147247	0.000433543
KLHL14	12.934	-2.522	0.8102	0.000149876	0.000440229
LOC105370826	61.209	-1.025	0.3013	0.000151738	0.000444724
LOC100101126	40.508	-1.0954	0.3244	0.00015296	0.000447763
RAD21P1	18.125	-1.775	0.5584	0.0001544	0.000451271
FOXP2	15.274	-1.8096	0.5717	0.000158693	0.000462718
LOC105369477	59.425	-1.0505	0.3121	0.000164221	0.00047761
LOC107987078	40.787	-1.1638	0.351	0.000164803	0.000479115
AVPR1A	15.998	-1.8007	0.5774	0.000174519	0.000504478
LOC107984485	57.141	-1.4657	0.4664	0.000188838	0.000540402
PABPC3	213.973	-1.1043	0.3374	0.000200272	0.0005701
LOC107987108	31.505	-1.3492	0.4235	0.000211547	0.000599072
LOC105371818	20.909	-1.2958	0.4053	0.000217395	0.000613748
EGR3	137.523	-1.2199	0.3823	0.000222736	0.000627027
NOTCH2NLC	104.825	-1.1065	0.3409	0.000222941	0.000627247
LRRN3	39.459	-1.1295	0.3492	0.000231441	0.000647825
LOC107984617	28.536	-1.3132	0.4175	0.000239385	0.000667907
SETP20	27.777	-1.2261	0.3836	0.000240441	0.000670347
RFX7	967.798	-1.4622	0.4784	0.000240619	0.000670716
PHACTR2P1	36.836	-1.1623	0.3637	0.000242962	0.000676096
CXCL14	22.142	-1.4911	0.4825	0.000250202	0.000695063
LOC105378936	54.655	-1.0704	0.3321	0.000261272	0.000721875
CSRNP3	21.707	-1.3766	0.4444	0.000274991	0.000755113
KLB	16.923	-1.6466	0.5456	0.00028275	0.000774399
LOC401261	25.348	-1.1963	0.3823	0.000309932	0.000841813
TP53INP2	197.93	-1.2393	0.4072	0.000342987	0.000923099
WDFY3-AS2	23.576	-1.3279	0.4387	0.000359459	0.000963564
CASQ2	38.54	-1.0547	0.3362	0.000370455	0.000989982
PDLIM1P4	38.086	-1.1318	0.3663	0.000372887	0.000995579
ARMCX4	103.875	-1.0074	0.3211	0.00037813	0.00100757
CPB2	43.694	-1.0215	0.3258	0.0003859	0.00102656
LINC01549	17.196	-1.5135	0.509	0.000390781	0.00103772
LOC112268093	39.708	-1.294	0.4349	0.000403955	0.00106847
LOC105379082	16.75	-1.4783	0.5016	0.0004066	0.0010747
LOC100420528	58.013	-1.3015	0.439	0.000410629	0.00108418
BCLAF1P1	29.285	-1.1424	0.3733	0.00041562	0.00109619
ZNF154	33.923	-1.2058	0.4007	0.000435439	0.00114355
PPIL6	40.237	-1.0044	0.3224	0.000441156	0.00115733
LOC105373449	26.129	-1.4536	0.5035	0.000464549	0.00121288
LINC01844	43.952	-1.1238	0.372	0.000468799	0.00122181
LOC344065	24.456	-1.2787	0.4342	0.000490818	0.00127335
DLGAP1-AS5	13.515	-1.6977	0.6004	0.000505791	0.00130668
HMGB3P24	30.287	-1.2085	0.4089	0.000507409	0.00130994
GLI3	630.637	-1.433	0.5075	0.000512563	0.00132186
LOC101928251	34.04	-1.0034	0.3282	0.000523329	0.0013468
PNMA2	29.177	-1.0033	0.3291	0.000543255	0.00139297
TTPA	37.454	-1.0038	0.3304	0.000565896	0.001445
AAK1	1146.87	-1.0472	0.3514	0.000577965	0.00147175
LINC01355	67.439	-1.0056	0.3353	0.000595747	0.00151363
NAP1L5	27.143	-1.0613	0.3565	0.000614622	0.00155569
CNTNAP4	16.071	-1.5819	0.5721	0.000637559	0.00160851
NEB	38.458	-1.2415	0.4355	0.000646373	0.00162907
MEGF11	66.205	-1.0356	0.3537	0.000708645	0.00177089
MR1P1	40.774	-1.0041	0.34	0.000712667	0.00177883
MANEA-DT	26.359	-1.3207	0.475	0.000721551	0.00179888
PCDH20	26.297	-1.201	0.4212	0.000734481	0.00182957
LOC105379420	22.658	-1.4622	0.5468	0.000832106	0.00204615
LOC101927377	29.844	-1.4064	0.5273	0.000871121	0.0021332
RNPC3P1	15.668	-1.3681	0.5	0.000881507	0.00215577
MTATP6P1	72.796	-1.2182	0.445	0.000907042	0.00221308
NCOA6	388.024	-1.0665	0.3807	0.000952912	0.00231657
HAS3	29.792	-1.0818	0.3846	0.000959184	0.00232913
LINC02611	19.744	-1.3408	0.5018	0.000980257	0.00237678
P2RY12	19.73	-1.721	0.6829	0.00100484	0.00242999
NOVA1	78.188	-1.0694	0.3844	0.00101687	0.00245789
LOC105374187	30.728	-1.1327	0.4136	0.00109211	0.00262213
C7orf31	65.929	-1.116	0.4103	0.00113909	0.00272076
TEX13D	35.536	-1.0374	0.3763	0.00119888	0.00285
SPEN	1073.94	-1.3129	0.5128	0.00125575	0.00297297
PLN	22.135	-1.2435	0.4694	0.00126491	0.00299173
HMGA2-AS1	19.738	-1.2663	0.4918	0.00143413	0.00334904
LOC107985236	26.616	-1.0683	0.401	0.00152468	0.00353864
MTND2P28	35.931	-1.0209	0.3827	0.00157895	0.00364682
LOC107986119	28.842	-1.0441	0.393	0.00161729	0.00372895
LOC100130210	36.108	-1.0641	0.4043	0.00165409	0.0038025
LOC105377945	59.285	-1.0477	0.3984	0.00168801	0.00387355
GRIN2B	21.346	-1.5414	0.6517	0.00169014	0.00387691
LINC00216	15.324	-1.354	0.5421	0.00175734	0.00401421
HADHAP1	25.088	-1.0819	0.416	0.00177643	0.00405343
OTOL1	23.273	-1.2057	0.4774	0.00178467	0.00406783
CHAMP1	404.532	-1.3105	0.544	0.00182737	0.00415745
LOC105379482	16.589	-1.2434	0.4973	0.00187637	0.00425973
FST	16.844	-1.2908	0.521	0.00197404	0.00445813
EDIL3-DT	19.507	-1.1383	0.4497	0.00197721	0.00446324
LOC101927647	26.637	-1.0093	0.3877	0.00201012	0.00453338
LOC107984583	31.815	-1.0289	0.402	0.00213638	0.0047852
LOC105374010	24.812	-1.1307	0.4546	0.00222663	0.00496325
LOC112268443	20.005	-1.2149	0.5055	0.00243478	0.00538572
LOC112267914	63.788	-1.0141	0.4059	0.00251582	0.00554338
LOC105378549	20.432	-1.1105	0.454	0.00257912	0.00566965
LOC105372210	20.901	-1.376	0.6075	0.00258904	0.00568686
CCR1	15.041	-1.3573	0.6103	0.00298282	0.00645949
LOC105373802	20.35	-1.076	0.4522	0.00324626	0.00697471
CCNK	124.42	-1.0046	0.4203	0.00333191	0.0071369
FRMD7	18.822	-1.0488	0.442	0.00355526	0.00756481
CYTB	4362.35	-1.0434	0.4478	0.00358744	0.0076234
MAST4-AS1	16.204	-1.1305	0.4957	0.00382107	0.0080664
SBSPON	20.308	-1.3082	0.6205	0.00393052	0.00826906
EFCAB5	18.801	-1.0375	0.4503	0.00420997	0.0088005
IFT80	25.856	-1.1551	0.5204	0.00432775	0.00902623
ANKRD20A13P	13.087	-1.2344	0.5695	0.00435257	0.00907545
CXCL9	18.192	-1.1572	0.5319	0.00461849	0.00957174
WIPF3	28.456	-1.195	0.5717	0.00474514	0.00980942

## Sheet: WikiPathways_UP
WikiPathways 2024 Human | Upregulated DEGs | Sorted by Adjusted P-value | Bold = shown in figure
Top 20 sig. → orange | Other sig. → yellow | Bold = pathway shown in figure (3 pathways) | Significant (adj.p<0.05): 50/753
Term	Overlap	Overlap (%)	P-value	Adjusted P-value	Odds Ratio	Combined Score	Genes
Senescence Associated Secretory Phenotype SASP WP3391	42/113	37.17	1.10819e-13	8.34468e-11	5.0024	149.227	CEBPB;CXCL8;ANAPC11;FZR1;H2AC14;H3C13;H2BC21;H3C11;RPS6KA1;H3C12;H3C1;H3C10;H4C2;H3C3;H4C1;H3C2;H4C4;H3C4;H4C6;H3C7;H4C5;H3C6;MAPK3;H4C8;H2BC9;H2AC8;JUN;H4C9;H2BC8;H2AC6;H2BC5;H2BC17;H2BC12;IL1A;H2BC13;H2BC15;UBE2S;H4C13;H2BC10;H4C12;H2BC11;ANAPC2
Photodynamic Therapy Induced NFE2L2 NRF2 Survival Signaling WP3612	12/23	52.17	9.77276e-07	0.000367944	9.1262	126.293	ABCC3;MAPK11;JUN;NQO2;ABCC2;SRXN1;GSTP1;EPHX1;KEAP1;HMOX1;GCLM;MAPK12
NRF2 Pathway WP2884	34/141	24.11	4.31448e-06	0.00108294	2.6715	33.0025	SRXN1;GSTP1;SLC2A1;KEAP1;TXN;SLC7A11;SLC2A6;SLC2A8;RXRA;FTH1;HMOX1;GGT1;SLC39A3;CBR3;GSTM4;ABCC3;GSTM3;CBR1;G6PD;ABCC2;TXNRD1;GSR;SLC39A13;NRG1;PGD;PTGR1;SLC6A6;MAFG;MAFF;BLVRB;GCLM;SQSTM1;EPHA2;FTL
Nuclear Receptors Meta Pathway WP2882	60/314	19.11	6.29214e-06	0.0011845	1.9941	23.8819	ALAS1;SRXN1;SLC2A1;KEAP1;SLC7A11;SLC2A6;SLC2A8;FTH1;SLCO2B1;DNER;GGT1;JUNB;SLC39A3;SRGN;ABCC3;IL11;CBR1;G6PD;SERPINB2;ABCC2;AIP;SLC39A13;NRG1;PTGR1;PGD;SLC7A5;CDC37;IL1B;BLVRB;MFGE8;SQSTM1;EPHA2;FTL;BIRC3;SRC;GSTP1;TXN;SULT1A1;PTPA;SRPX2;RXRA;HMOX1;LRRC8A;PLTP;CBR3;GSTM4;GSTM3;JUN;GADD45B;CCL20;TXNRD1;GSR;NFKB2;SLC6A6;ETNK2;MAFG;MAFF;CYP1A1;BAX;GCLM
Catabolism Of Skeletal Muscle In Cachexia WP5474	15/40	37.5	8.02928e-06	0.00120921	5.0225	58.9265	CEBPB;TNFRSF12A;IL1R1;RELB;NFKB2;TNFRSF1A;RPTOR;NFKBIA;MAPK11;IL1A;IL1B;AKT1S1;MLST8;AKT1;IKBKG
Histone Modifications WP2369	20/66	30.3	1.15281e-05	0.00144677	3.6438	41.4325	H4C8;H4C9;KMT5C;SUV39H1;DOT1L;H3C13;H4C13;H3C11;H4C12;H3C12;H3C1;H3C10;H4C2;H4C1;H4C4;H3C4;H4C6;H3C7;H4C5;H3C6
IL1 Signaling WP195	17/54	31.48	2.97547e-05	0.00320076	3.8471	40.0966	MAP2K3;JUN;MAP2K2;IL1R1;ECSIT;NFKBIA;IL1A;IRAK1;IL1B;AKT1;IKBKG;TAB1;MAP2K7;SQSTM1;MAP3K14;MAPK3;NFKBIB
22Q11 2 Copy Number Variation Syndrome WP4657	28/119	23.53	4.69855e-05	0.00442251	2.5819	25.7302	SLC25A1;SRF;NPRL3;TRMT2A;COMT;ESS2;CYP26B1;ARVCF;HIRIP3;DGCR8;DGCR6L;UFD1;H4C1;SCARF2;DGCR2;PAK4;VWF;SERPIND1;TXNRD2;TANGO2;KLHL22;RANGAP1;ALDH4A1;CYP26A1;P2RX6;MAG;THAP7;LZTR1
Focal Adhesion WP306	40/199	20.1	6.61847e-05	0.00553745	2.1149	20.3516	SHC1;SRC;PDGFA;ILK;AKT2;RAC2;SPP1;AKT1;RAC3;FLNA;FLNB;PIP5K1C;FLNC;PAK4;MAPK3;VASP;PDGFRB;JUN;VWF;LAMB3;PRKCB;ITGA3;EGF;LAMB2;BAD;ACTN1;TNK2;TNK1;STYK1;ACTN4;VEGFA;PPP1CA;COL4A2;COL5A3;COL6A2;ZYX;ITGA5;PPP1R12C;BCAR1;BIRC3
NF1 Copy Number Variation Syndrome WP5366	25/104	24.04	8.0868e-05	0.00608936	2.6535	25.0027	H3C13;H3C11;H3C12;H3C1;H3C10;H4C2;H3C3;H4C1;H3C2;H4C4;H3C4;H4C6;H3C7;H4C5;H3C6;MAPK3;H4C8;NGFR;H4C9;EGF;LIMK1;POLRMT;H4C13;H4C12;RAD9A
TNF Related Weak Inducer Of Apoptosis TWEAK Signaling WP2036	13/38	34.21	9.78145e-05	0.00669585	4.3488	40.1498	JUN;TNFRSF12A;TRAF2;TRAF1;RELB;NFKB2;NFKBIA;AKT2;AKT1;MAP3K14;MAPK3;BIRC3;NFKBIB
TNF Alpha Signaling WP231	22/89	24.72	0.000136878	0.00858912	2.7512	24.476	MAP2K3;MAP4K2;JUN;BAD;CYBA;TRAF2;TRAF1;TXN;TNFRSF1A;NFKB2;NFKBIA;CDC37;AKT1;BAX;IKBKG;TAB1;MAP2K7;RFFL;MAP3K14;BIRC3;MAPK3;NFKBIB
RANKL RANK Signaling WP2018	15/50	30	0.000159248	0.00922416	3.5855	31.3555	JUN;SRC;FHL2;TRAF2;TRAF1;RELB;NFKB2;NFKBIA;AKT2;AKT1;IKBKG;TAB1;MAP2K7;SQSTM1;MAPK3
Host Pathogen Interaction Of Human Coronaviruses MAPK Signaling WP4877	12/36	33.33	0.000238912	0.0110777	4.1798	34.857	MAP2K3;BST2;MAPK11;JUN;MAP2K2;RPS6KA1;MAP3K10;MAP2K7;JUNB;MAPK12;MAP3K11;MAPK3
mRNA Protein And Metabolite Inducation Pathway By Cyclosporin A WP3953	5/7	71.43	0.000246238	0.0110777	20.8563	173.299	SLC7A5;KEAP1;SLC3A2;SLC1A5;SLC7A11
Pentose Phosphate Metabolism WP134	5/7	71.43	0.000246238	0.0110777	20.8563	173.299	G6PD;TALDO1;PGLS;PGD;TKT
VEGFA VEGFR2 Signaling WP3888	70/430	16.28	0.000250094	0.0110777	1.6394	13.5968	CXCL8;FHOD1;CCDC124;FHL2;PLOD3;HSPB1;AP2A1;SHB;TUBA1C;CSRP1;RPL18A;BSG;MLST8;AKT1;RPLP2;SH3BGRL3;MAP2K3;DUSP5;MAP2K2;GPX1;SSR4;PRKCB;PLAUR;PGD;RHOC;EPN1;DOK1;BIN1;HGS;AKT1S1;FSCN1;MYH9;TKT;ATP6V0D1;ALDOA;GAPDH;SLC25A11;EPHA2;NAPA;HDAC5;SHC1;SRC;FLII;SRF;CRIP2;TXN;GATA2;NDRG1;HDAC7;PRDX2;DNAJB4;GPC1;FLNB;CSK;MAP2K7;TXNDC5;MAPK3;JUN;JAG1;LIMK1;MAPK12;VEGFA;PPP1CA;NFKBIA;MOV10;NR4A1;MYO1C;GIPC1;TAOK…
Effect Of Progerin On Genes Involved In Progeria WP4320	12/37	32.43	0.00031936	0.0133599	4.0124	32.2964	MBD3;H3C13;SUV39H1;H3C11;H3C12;H3C1;H3C10;H3C3;H3C2;H3C4;H3C7;H3C6
Ebstein Barr Virus LMP1 Signaling WP262	9/23	39.13	0.000370898	0.0139483	5.3695	42.4167	NFKBIA;CXCL8;IRAK1;CCL20;TRAF1;IKBKG;MAP3K14;PDLIM7;NFKB2
MicroRNAs In Cardiomyocyte Hypertrophy WP1544	20/83	24.1	0.000388998	0.0139483	2.658	20.8705	MAP2K3;HDAC5;MAP2K2;PRKCB;EGF;LRP5;LIF;NRG1;HDAC7;NFATC4;AKT2;DVL1;AKT1;IKBKG;TAB1;MAP2K7;IKBKE;MAP3K14;MAPK4;MAPK3
Integrin Mediated Cell Adhesion WP185	23/101	22.77	0.000358379	0.0139483	2.4703	19.599	MAP2K3;VASP;MAP2K2;SHC1;ITGA3;SRC;ILK;MYPN;MAPK12;CAPNS1;CAPN10;AKT2;ITGAX;RAC2;ZYX;AKT1;RAC3;CSK;CAPN1;ITGA5;MAPK4;BCAR1;PAK4
MAPK Signaling WP382	44/246	17.89	0.000468145	0.014688	1.8302	14.0315	SRF;PDGFA;HSPB1;ECSIT;RELB;RPS6KA4;RRAS;AKT2;MKNK2;RAC2;AKT1;RAC3;FLNA;FLNB;IKBKG;FLNC;MAP3K6;MAP2K7;MAPK3;PDGFRB;MAP2K3;MAP4K2;JUN;DUSP2;MAP2K2;IL1R1;BDNF;EGF;TRAF2;CACNA2D4;MAPK8IP3;MAPK12;NFKB2;TNFRSF1A;IL1A;NR4A1;MAPK11;IL1B;TAOK2;TAB1;FGFR4;MAP3K14;FGFR3;MAP3K11
EGFR Tyrosine Kinase Inhibitor Resistance WP4806	20/84	23.81	0.000459851	0.014688	2.6163	20.1054	PDGFRB;MAP2K2;PRKCB;SHC1;SRC;EGF;BAD;PDGFA;NRG1;VEGFA;RRAS;AXL;AKT2;RPS6KB2;EIF4EBP1;AKT1;BAX;GAS6;FGFR3;MAPK3
NPHP1 Deletion Syndrome WP5399	6/11	54.55	0.00043288	0.014688	10.014	77.5591	FLNA;FLNB;NPHP4;FLNC;BCAR1;MAPK3
Clear Cell Renal Cell Carcinoma Pathways WP4018	20/85	23.53	0.000541646	0.0163144	2.5759	19.3733	PDGFRB;TPI1;SLC2A1;TSC2;ENO1;ENO2;SDSL;ENO3;VEGFA;RPTOR;PFKL;PKM;AKT1S1;MLST8;AKT1;ALDOA;SQSTM1;GAPDH;BAP1;PFKP
Aerobic Glycolysis WP4629	6/12	50	0.000787224	0.0207075	8.3446	59.6385	PKM;TPI1;SLC2A1;ENO1;ALDOA;GAPDH
Nucleotide Excision Repair In Xeroderma Pigmentosum WP5114	18/75	24	0.000784554	0.0207075	2.6424	18.8943	H4C8;H4C9;H2AC6;LIG1;GPS1;RAD23A;POLD4;XAB2;H4C13;POLD1;ERCC1;H4C12;ERCC2;H4C2;H4C1;H4C4;H4C6;H4C5
Insulin Signaling WP481	31/160	19.38	0.000797499	0.0207075	2.015	14.3752	SHC1;SRF;SLC2A1;RPS6KA4;AKT2;RPS6KA1;EIF4EBP1;RAC2;AKT1;MAP3K6;MAP2K7;MAPK4;MAPK3;MAP2K3;MAP4K2;JUN;MAP2K2;PRKCB;TSC2;MAPK12;ARHGAP33;EHD1;EHD2;MAPK11;PFKL;MYO1C;RPS6KB2;MAP3K10;TRIB3;MAP3K14;MAP3K11
S1P Receptor Signal Transduction WP26	9/25	36	0.000760188	0.0207075	4.6978	33.7391	SPHK2;AKT2;SPHK1;AKT1;S1PR2;MAPK4;MAPK12;GNAI2;MAPK3
Toll Like Receptor Signaling WP75	21/95	22.11	0.000956835	0.0236164	2.3757	16.5155	MAP2K3;CD40;JUN;CXCL8;MAP2K2;LY96;MAPK12;NFKBIA;MAPK11;IRF3;IRAK1;AKT2;IL1B;SPP1;AKT1;IKBKG;TAB1;MAP2K7;IKBKE;MAPK3;NFKBIB
7Q11 23 Distal Copy Number Variation WP5401	8/21	38.1	0.000972256	0.0236164	5.1379	35.6359	SRRM3;POR;RHBDD2;DAPK2;TMEM120A;LMNA;HSPB1;ZP1
Antiviral And Anti-Inflam Effects Of Nrf2 On SARS CoV 2 Pathway WP5113	10/31	32.26	0.00104824	0.0246664	3.9777	27.2895	NFKBIA;CXCL8;RXRA;IRF3;IL1B;KEAP1;HMOX1;SLC7A11;IKBKG;GCLM
Ferroptosis WP4313	16/65	24.62	0.00112635	0.0246869	2.731	18.5398	PRNP;GPX4;TXNRD1;AKR1C1;AKR1C3;HSPB1;SLC3A2;SLC7A11;SLC1A5;POR;AIFM2;FTH1;HMOX1;CHMP6;GCLM;FTL
5Q35 Copy Number Variation WP5380	23/109	21.1	0.00110692	0.0246869	2.2395	15.2423	COX8A;PRELID1;JUN;RGS14;SRC;TPM2;F12;CLTB;HIP1R;CXCR4;COX5B;GNAI2;BABAM1;LMAN2;GRK6;TSPAN17;NELFB;FAM193B;FGFR4;B4GALT7;DBN1;PDLIM7;PNPLA2
Metabolic Reprogramming In Colon Cancer WP4290	12/42	28.57	0.00114746	0.0246869	3.3427	22.6308	G6PD;PFKL;PKM;SLC2A1;TALDO1;SLC1A5;ENO1;ACO2;PGD;TKT;SLC16A3;GAPDH
Cori Cycle WP1946	7/17	41.18	0.0011873	0.0248345	5.8426	39.3562	G6PD;TPI1;SLC2A1;TALDO1;ALDOA;GAPDH;PFKP
Aerobic Glycolysis Augmented WP4628	6/13	46.15	0.00132967	0.0267052	7.1521	47.367	TPI1;PKM;SLC2A1;ENO1;ALDOA;GAPDH
P53 Transcriptional Gene Network WP4963	20/91	21.98	0.00134767	0.0267052	2.3574	15.5813	GPX1;NOTCH1;SIVA1;SERPINE1;SLC2A1;LIF;TSC2;SLC7A11;CPT1C;CX3CL1;BBC3;RPTOR;ALDH4A1;TRAF4;AKT1S1;MLST8;PMAIP1;BAX;ULK1;ULBP2
Interleukin 1 IL 1 Structural Pathway WP2637	13/49	26.53	0.0015414	0.0297609	3.0181	19.5425	MAP2K3;MAP2K2;IL1R1;NFKBIA;IL1A;MAPK11;IRAK1;MKNK2;TAB1;MAP2K7;MAP3K14;MAPK3;NFKBIB
Cardiac Hypertrophic Response WP2795	14/55	25.45	0.00159436	0.0298253	2.8544	18.3863	MAP2K3;HDAC5;MAP2K2;EGF;NRG1;TNFRSF1A;HDAC7;AKT2;AKT1;IKBKG;MAP2K7;IKBKE;MAP3K14;MAPK3
Relevant Molecular Pathways And Targeted Agents In TNBC WP5215	11/38	28.95	0.00162396	0.0298253	3.4036	21.8609	RPTOR;MAP2K2;AKT2;AKT1S1;MLST8;EIF4EBP1;AKT1;TSC2;PRR5L;TELO2;MAPK3
Congenital Generalized Lipodystrophy WP5101	7/18	38.89	0.00176422	0.0303419	5.3112	33.673	BSCL2;DGAT1;CAVIN1;AKT2;GPAT3;AGPAT2;LPIN3
Neurodegeneration W Brain Fe Accumulation NBIA Subtypes Pathway WP4577	12/44	27.27	0.00178757	0.0303419	3.1334	19.8249	RPTOR;ATG101;AKT1S1;MLST8;ATG2A;TSC2;ATP13A2;ULK1;PLA2G6;WDR45;GTPBP2;FTL
Signal Transduction Through IL1R WP4496	10/33	30.3	0.00179175	0.0303419	3.6314	22.967	MAP2K3;NFKBIA;IL1A;JUN;IRAK1;IL1R1;IL1B;TAB1;ECSIT;MAP3K14
Burn Wound Healing WP5055	17/74	22.97	0.00181326	0.0303419	2.4944	15.7465	PDGFRB;TAGLN;CXCL8;AMBP;EGF;HEXD;CXCR4;MMP9;VEGFA;LGALS1;IL1B;S100A6;AKT1;BAX;TIMP1;FGFR4;FGFR3
Osteoarthritic Chondrocyte Hypertrophy WP5373	13/50	26	0.00188164	0.0308016	2.9364	18.4276	CEBPB;JUN;RELB;VEGFA;FOSL1;MMP13;AKT2;SPP1;AKT1;FGFR4;JUNB;FGFR3;MAPK3
Eicosanoid Synthesis WP167	8/23	34.78	0.00192635	0.0308626	4.4523	27.8366	CBR1;PTGES2;TBXAS1;AKR1C3;PLA2G6;GGT1;PTGS1;PTGES
Bladder Cancer WP2828	11/40	27.5	0.00255248	0.0400421	3.1685	18.9181	RASSF1;CXCL8;MAP2K2;SRC;EGF;DAPK2;DAPK3;MMP9;FGFR3;TYMP;VEGFA
Translation Inhibitors In Chronically Activated PDGFRA Cells WP4566	12/46	26.09	0.00269486	0.0414128	2.9488	17.4462	RPTOR;RPS6KA4;MAP2K3;MAP2K2;AKT2;RPS6KA1;RPS6KB2;PIM1;EIF4EBP1;AKT1;MAP2K7;MAPK3
Photodynamic Therapy Induced NF kB Survival Signaling WP3617	10/35	28.57	0.00291206	0.0438556	3.3405	19.5049	IL1A;CXCL8;IL1B;CXCL2;MMP9;RELB;VEGFA;NFKB2;TNFRSF1A;BIRC3
4 Hydroxytamoxifen DEX And Retinoic Acids Regulation Of P27 WP3879	8/25	32	0.00349651	0.0506322	3.9281	22.2173	MAP2K3;MAP2K2;MKNK2;EIF4EBP1;AKT1;TSC2;MAP3K11;MAPK3
Primary Focal Segmental Glomerulosclerosis FSGS WP2572	16/72	22.22	0.00348233	0.0506322	2.3886	13.5199	NOTCH1;CD151;JAG1;ITGA3;LAMB2;PLAUR;KRT8;LRP5;ILK;ACTN4;DNM1;INF2;CTSL;AKT1;MYH9;AGRN
HDAC6 Interactions In The Central Nervous System WP5426	22/112	19.64	0.00360763	0.0512556	2.0455	11.5052	BDNF;HDAC11;MIIP;HSPB1;TUBA4A;SIRT2;SMAD7;PPP1CA;PRDX2;TUBA1C;GRK2;TUBB3;MAP1B;HSF1;AKT1;MYH9;BAX;ATP13A2;STUB1;SQSTM1;NDUFV1;MAPK3
16P11 2 Distal Deletion Syndrome WP4950	9/31	29.03	0.00414781	0.0578389	3.4154	18.7341	CD82;RABEP2;CD81;PRMT1;SPNS1;TRAF2;TRAF1;LAT;SH2B1
Neovascularization Processes WP4331	10/37	27.03	0.00453029	0.0609162	3.0927	16.6913	ACVRL1;NOTCH1;JAG1;CXCR4;AKT1;MMP9;EPHB4;RELB;MAPK3;NFKB2
Thymic Stromal Lymphopoietin TSLP Signaling WP2203	10/37	27.03	0.00453029	0.0609162	3.0927	16.6913	NFKBIA;MAP2K2;SRC;FES;STAT4;EIF4EBP1;AKT1;RELB;MAPK3;NFKB2
Quercetin And Nf kB AP 1 Induced Apoptosis WP2435	6/16	37.5	0.00467474	0.0617558	5.0056	26.858	NFKBIA;JUN;MAFG;KEAP1;MAFK;VEGFA
Ebola Virus Infection In Host WP4217	24/129	18.6	0.00503916	0.0654222	1.9128	10.1199	VPS18;ITGA3;ACTN1;CLTB;ICAM3;ACTN4;RHOC;NFKB2;RHOB;RELB;BST2;IRF3;CTSL;AXL;AKT1;FLNA;FLNB;ITGA5;FLNC;GAS6;MFGE8;IKBKE;VPS16;MAPK3
1P36 Copy Number Variation Syndrome WP5345	20/102	19.61	0.00546788	0.069785	2.0399	10.6258	INTS11;MIB2;TRAF2;NOC2L;ATAD3B;ATAD3A;FAAP20;VEGFA;ACAP3;C1ORF159;CPTP;DVL1;SDF4;VWA1;AURKAIP1;PUSL1;AGRN;NADK;SAMD11;MCM2
FBXL10 Enhancement Of MAP ERK Signaling In DLBCL WP4553	9/33	27.27	0.00652065	0.0818342	3.1304	15.7548	H3C13;H3C11;H3C12;H3C1;H3C10;H3C4;H3C7;MAPK3;H3C6
Glycolysis And Gluconeogenesis WP534	11/45	24.44	0.00679933	0.082579	2.7018	13.4844	PFKL;TPI1;PKM;PC;SLC2A1;ENO1;ENO2;ALDOA;ENO3;GAPDH;PFKP
Angiopoietin Like Protein 8 Regulatory Pathway WP3915	24/132	18.18	0.00676097	0.082579	1.8594	9.2906	MAP2K3;MAP4K2;MAP2K2;SHC1;SLC2A1;TSC2;MAPK12;RPS6KA4;RPTOR;MAPK11;RXRA;AKT2;RPS6KA1;RPS6KB2;EIF4EBP1;MLST8;AKT1;MAP3K10;MAP3K6;MAP2K7;MAP3K14;MAP3K11;MAPK4;MAPK3
Selenium Micronutrient Network WP15	17/86	19.77	0.00915766	0.109456	2.0592	9.6643	GPX1;GPX4;TXNRD2;TXNRD1;SERPINE1;GSR;TXN;PTGS1;NFKB2;SELENOO;PRDX2;SELENOM;PRDX5;KYNU;IL1B;GGT1;MSRB1
Ethanol Metabolism Production Of ROS By CYP2E1 WP4269	4/9	44.44	0.0106664	0.119618	6.6698	30.2852	MAP2K2;MAFG;MAFF;MAFK
Thiamine Metabolic Pathways WP4297	4/9	44.44	0.0106664	0.119618	6.6698	30.2852	BCKDK;BCKDHA;SLC25A19;TKT
HIF1A And PPARG In Cardiac Hypertropthy WP2456	4/9	44.44	0.0106664	0.119618	6.6698	30.2852	TPI1;SLC2A1;GPAT3;GAPDH
Benzo A Pyrene Metabolism WP696	4/9	44.44	0.0106664	0.119618	6.6698	30.2852	AKR1C1;EPHX1;AKR1C3;CYP1A1
Follicle Stimulating Hormone FSH Signaling WP2035	7/24	29.17	0.0108022	0.119618	3.4355	15.5559	SRC;GRK6;RPS6KB2;EIF4EBP1;TSC2;AKT1;MAPK3
Omega 6 Fatty Acids In Senescence WP5424	11/48	22.92	0.0112312	0.122567	2.4823	11.1432	CBR1;MAPK11;GPX1;PTGES2;GSTP1;SERPINE1;TBXAS1;AKR1C3;GGT1;PTGS1;PTGES
Small Cell Lung Cancer WP4658	18/95	18.95	0.011567	0.123354	1.9539	8.7135	ZBTB17;LAMB3;GADD45B;ITGA3;LAMB2;TRAF2;TRAF1;NFKBIA;RXRA;TRAF4;COL4A2;AKT2;AKT1;BAX;IKBKG;BIRC7;BIRC3;NFKBIB
Glutathione Metabolism WP100	6/19	31.58	0.0119586	0.123354	3.8498	17.0405	G6PD;GPX1;GPX4;GSR;GGT1;GCLM
Target Of Rapamycin Signaling WP1471	9/36	25	0.0118715	0.123354	2.7821	12.335	PRR5;RPTOR;AKT1S1;MLST8;EIF4EBP1;AKT1;TSC2;PRR5L;ULK1
Matrix Metalloproteinases WP129	8/30	26.67	0.0116572	0.123354	3.0345	13.5091	MMP12;MMP24;MMP13;MMP15;BSG;MMP17;TIMP1;MMP9
Apoptosis Modulation And Signaling WP1772	17/89	19.1	0.0128315	0.130132	1.9731	8.5946	JUN;IL1R1;BAD;BNIP3;BBC3;TNFRSF1A;NFKBIA;CAPNS1;IRAK1;AIFM2;PMAIP1;BAX;BIRC7;MAP3K14;BOK;BIRC3;MAPK3
Nonalcoholic Fatty Liver Disease WP4396	26/154	16.88	0.0129613	0.130132	1.6993	7.3847	NDUFA13;CXCL8;NDUFB7;NDUFA11;NDUFB4;UQCR11;COX5B;BBC3;RXRA;AKT2;AKT1;CYC1;NDUFV1;COX8A;JUN;NDUFA7;TRAF2;SMAD7;TNFRSF1A;IL1A;NDUFS8;NDUFS6;IL1B;UQCRC1;BAX;MAP3K11
Base Excision Repair WP4752	8/31	25.81	0.0142691	0.134308	2.9024	12.3342	POLD4;LIG1;MPG;NTHL1;PNKP;POLD1;POLL;MUTYH
Photodynamic Therapy Induced HIF 1 Survival Signaling WP3614	9/37	24.32	0.0142312	0.134308	2.6826	11.4074	PFKL;PKM;BNIP3;SERPINE1;IGFBP2;SLC2A1;PMAIP1;BAX;VEGFA
7Q11 23 Copy Number Variation Syndrome WP4932	19/104	18.27	0.0141128	0.134308	1.8684	7.9604	VPS9D1;LIMK1;HMGA1;NRG1;CHTF18;ATP5F1D;ATP5F1E;CLIP2;CLDN4;ABHD11;MYO1C;MVB12A;ULK1;METTL27;SQSTM1;GAPDH;VPS28;STX1A;MAPK3
IL6 Signaling WP364	10/43	23.26	0.0137903	0.134308	2.5296	10.8361	MAP2K2;SHC1;BAD;IRF1;AKT1;TIMP1;TYK2;JUNB;MAPK3;NR2F6
miRNA Role In Immune Response In Sepsis WP4329	9/37	24.32	0.0142312	0.134308	2.6826	11.4074	NFKBIA;IL1A;CXCL8;IRAK1;IRF1;IKBKG;TAB1;RELB;NFKB2
Lung Fibrosis WP3624	13/63	20.63	0.0149422	0.138907	2.1713	9.1274	CEBPB;CXCL8;EGF;PDGFA;MUC5B;CXCL2;MMP9;SMAD7;MT2A;IL1B;SPP1;HMOX1;TIMP1
Apoptosis WP254	16/84	19.05	0.0158694	0.145727	1.9658	8.145	JUN;BAD;TRAF2;TRAF1;BBC3;TNFRSF1A;NFKBIA;IRF3;IRF1;AKT1;PMAIP1;BAX;IKBKG;BOK;BIRC3;NFKBIB
Perturbations Host Cell Autophagy Induced By SARS CoV 2 Prots WP4936	10/44	22.73	0.016177	0.146762	2.455	10.1249	RPTOR;VPS18;PKM;ATG9A;AKT1S1;MLST8;AKT1;ULK1;SQSTM1;VPS16
Transcriptional Activation By NRF2 In Response To Phytochemicals WP3	5/15	33.33	0.0168874	0.150435	4.1694	17.0161	CEBPB;KEAP1;HMOX1;SLC7A11;GCLM
Growth Factors And Hormones In Beta Cell Proliferation WP5385	7/26	26.92	0.0169814	0.150435	3.0735	12.5265	CRTC2;RASSF1;AKT2;PDGFA;AKT1;MAPK3;SMAD7
Hepatitis B Infection WP4666	25/151	16.56	0.018371	0.160853	1.6593	6.6321	CXCL8;SRC;IRAK1;AKT2;STAT4;AKT1;IKBKG;MAP2K7;IKBKE;MAPK3;MAP2K3;JUN;MAP2K2;PRKCB;BAD;TYK2;HSPG2;MMP9;MAPK12;NFATC4;CREB3;MAPK11;IRF3;BAX;TAB1
Aryl Hydrocarbon Receptor Pathway WP2873	10/45	22.22	0.0188563	0.163204	2.3847	9.4696	SLC7A5;JUN;SERPINB2;SRC;CDC37;IL1B;AIP;CYP1A1;BAX;JUNB
Pleural Mesothelioma WP5087	61/437	13.96	0.0192172	0.164277	1.3607	5.3774	CSF1;SLC2A1;BBC3;RPTOR;RASSF1;MDK;RASSF4;AKT2;RPS6KA1;MLST8;AKT1;MAP3K6;TEAD3;MAP2K3;PDGFRB;MAP4K2;MAP2K2;ITGA3;AXIN1;TSC2;TRAF2;MMP9;SLC7A5;COL4A2;TNNT1;IL1B;AKT1S1;ULK1;MAD1L1;TELO2;EPHA2;SHC1;SRC;LRP5;PDGFA;SLC3A2;NDRG1;PORCN;DVL1;MKNK2;EIF4EBP1;CDH24;MAP2K7;PAK4;MAPK3;NGFR;JUN;LAMB3;BDNF;EGF;LAMB2;VEGFA;FOSL1;EFNA3;RPS6KB2;MAP3K10;BAX;FGFR4;FGFR3;MAP3K11;BAP1
STING Pathway In Kawasaki Like Disease And COVID 19 WP4961	6/21	28.57	0.019857	0.164277	3.3361	13.075	NFKBIA;NLRX1;IRF3;IL1B;IKBKG;IKBKE
Fragile X Syndrome WP4549	21/122	17.21	0.0194628	0.164277	1.738	6.8463	MAP2K2;SHC1;BDNF;SRC;TECR;CLTB;TSC2;AP2A1;MMP9;DNM1;TARBP2;PPP1CA;RPTOR;MAP1B;AKT1S1;MLST8;AKT1;PICK1;EPS8L1;TELO2;SH3GL1
Macrophage Stimulating Protein MSP Signaling WP5353	19/108	17.59	0.0205547	0.164277	1.784	6.9302	PDGFRB;JUN;MAP2K2;CXCL8;PRKCB;SHC1;SRC;SLC2A1;HSPB1;NDRG1;CXCL2;MMP9;VEGFA;RPS6KA4;NR4A1;IL1B;RPS6KA1;AKT1;MAPK3
MAPK Cascade WP422	8/33	24.24	0.0207255	0.164277	2.6699	10.3496	MAP2K3;JUN;MAP2K2;RRAS;MAP2K7;MAPK12;SIPA1;MAPK3
Prostaglandin Signaling WP5088	8/33	24.24	0.0207255	0.164277	2.6699	10.3496	PYCARD;IL1A;CXCL8;CSF1;IL1B;MMP9;VEGFA;PTGES
Resistin As A Regulator Of Inflammation WP4481	8/33	24.24	0.0207255	0.164277	2.6699	10.3496	NFKBIA;CXCL8;AKT2;AKT1;IKBKG;PLCD3;PLCD1;MAPK3
Host Pathogen Interaction Of Human CoVs Apoptosis WP4864	6/21	28.57	0.019857	0.164277	3.3361	13.075	MAPK11;BAD;AKT1;BAX;MAPK12;BBC3
Network Map Of SARS CoV 2 Signaling WP5115	38/254	14.96	0.0217313	0.170455	1.4728	5.6393	LGALS3BP;CEBPB;CXCL8;C1S;C1R;SERPINE1;CXCL2;RPTOR;TRPM2;RRAS;IRAK1;CTSL;EIF4EBP1;MLST8;AKT1;IKBKG;NLRP1;JUNB;CTSD;VPS16;VPS18;UPF1;JUN;CCL20;ITGA3;TRAF2;NFKB2;BST2;MOV10;IL1A;LRG1;IRF3;IL1B;AKT1S1;ULK1;COQ8B;TBKBP1;CCL26
Glycolysis In Senescence WP5049	4/11	36.36	0.0234523	0.176596	4.7636	17.8768	G6PD;PKM;ENO1;GAPDH
Serotonin Transporter Activity WP1455	4/11	36.36	0.0234523	0.176596	4.7636	17.8768	IL1R1;TGFB1I1;IL1B;STX1A
NRP1 Triggered Signaling In Pancreatic Cancer WP5144	11/53	20.75	0.0231066	0.176596	2.1862	8.2367	MAP2K2;SRC;EGF;AKT2;AKT1;MMP9;BCAR1;RELB;MAPK3;VEGFA;NFKB2
Neural Crest Cell Migration During Development WP4564	9/40	22.5	0.0233772	0.176596	2.4226	9.0993	NGFR;JUN;BDNF;AKT2;AKT1;MMP9;EPHB4;F2RL2;PAK4
Novel Intracellular Components Of RIG I Like Receptor Pathway WP3865	12/60	20	0.0238785	0.178025	2.0871	7.7948	NFKBIA;MAPK11;CXCL8;NLRX1;IRF3;PIN1;TRAF2;TBKBP1;IKBKG;IKBKE;MAPK12;NFKBIB
TLR4 Signaling And Tolerance WP3851	7/28	25	0.0253055	0.186814	2.7805	10.2231	NFKBIA;CXCL8;IRAK1;IRF3;IKBKG;TAB1;IKBKE
RAC1 PAK1 P38 MMP2 Pathway WP3303	13/68	19.12	0.027163	0.19858	1.9734	7.1159	SRC;BAD;TIE1;MAPK12;NFKBIA;MAPK11;TNIP1;TNIP2;EIF4EBP1;AKT1;BAX;IKBKG;MAPK3
IL26 Signaling WP5347	10/48	20.83	0.0288351	0.206347	2.1961	7.7877	NFKBIA;JUN;CXCL8;CCL20;IL1B;AKT1;BAX;TYK2;MMP9;MAPK3
Amplification And Expansion Of Oncogenic Pathways WP3678	5/17	29.41	0.0290476	0.206347	3.4741	12.2942	NOTCH1;JAG1;SRC;CXCR4;VEGFA
ErbB Signaling WP673	16/90	17.78	0.0290444	0.206347	1.8058	6.3906	JUN;MAP2K2;PRKCB;SHC1;SRC;EGF;BAD;NRG1;AKT2;RPS6KB2;EIF4EBP1;AKT1;MAP2K7;CAMK2G;PAK4;MAPK3
Amino Acid Metabolism In Triple Negative Breast Cancer Cells WP5213	3/7	42.86	0.0309429	0.208036	6.2504	21.7238	SLC2A1;SLC1A5;SLC7A11
NRF2 ARE Regulation WP4357	6/23	26.09	0.0307018	0.208036	2.9433	10.2529	CEBPB;SRC;KEAP1;HMOX1;SLC7A11;GCLM
Cannabinoid Receptor Signaling WP3869	7/29	24.14	0.0303616	0.208036	2.6539	9.2744	MAPK11;PRKAR1B;CYP1A1;DAGLB;ADCY7;MAPK12;MAPK3
Non Genomic Actions Of 1 25 Dihydroxyvitamin D3 WP4341	14/76	18.42	0.0300717	0.208036	1.8854	6.6067	CD40;JUN;CXCL8;PRKCB;TYK2;MAPK12;TNFRSF1A;RELB;NFKB2;MAPK11;RXRA;CAMK2G;PLCD1;MAPK3
LDL Influence On CD14 And TLR4 WP5272	6/23	26.09	0.0307018	0.208036	2.9433	10.2529	MAPK11;CREB3;IL1B;MAPK12;RELB;NFKB2
FGF23 Signaling In Hypophosphatemic Rickets Related Disorders WP4790	6/23	26.09	0.0307018	0.208036	2.9433	10.2529	SPP1;FAM20C;ORAI1;FGFR3;PHEX;NFKB2
Alzheimer 39 S Disease WP5124	38/261	14.56	0.0317115	0.209463	1.426	4.9212	CSF1;LRP5;PSMA7;PSMD8;PSMB6;TUBA1C;KLC4;TUBB6;PSMB5;KLC2;TUBB3;ATG101;AKT2;PSMD3;DVL1;AKT1;APBB1;CAPN1;MAP2K7;MAPK3;PSENEN;MAP2K2;BAD;ADRM1;AXIN1;TRAF2;TUBB4B;TUBA4A;TNFRSF1A;IL1A;TUBB2B;TUBB2A;PSMC3;PSMC4;IL1B;ATG2A;ULK1;GAPDH
Alzheimer 39 S Disease And miRNA Effects WP2059	38/261	14.56	0.0317115	0.209463	1.426	4.9212	CSF1;LRP5;PSMA7;PSMD8;PSMB6;TUBA1C;KLC4;TUBB6;PSMB5;KLC2;TUBB3;ATG101;AKT2;PSMD3;DVL1;AKT1;APBB1;CAPN1;MAP2K7;MAPK3;PSENEN;MAP2K2;BAD;ADRM1;AXIN1;TRAF2;TUBB4B;TUBA4A;TNFRSF1A;IL1A;TUBB2B;TUBB2A;PSMC3;PSMC4;IL1B;ATG2A;ULK1;GAPDH
MAPK And NFkB Signaling Inhibited By Yersinia YopJ WP3849	4/12	33.33	0.0322515	0.211177	4.1679	14.3134	NFKBIA;RRAS;IKBKG;MAP3K14
Oncostatin M Signaling WP2374	11/56	19.64	0.0336072	0.216292	2.0401	6.9221	NFKBIA;CEBPB;MAP2K2;PRKCB;SHC1;SRC;AKT1;TYK2;JUNB;MAPK3;VEGFA
IL18 Signaling WP4754	11/56	19.64	0.0336072	0.216292	2.0401	6.9221	NFKBIA;CEBPB;IRAK1;PRKCB;IRF1;HSPB1;BAX;MAP2K7;TNFRSF1A;MAPK3;NFATC4
Corticotropin Releasing Hormone Signaling WP2355	16/92	17.39	0.0348635	0.220607	1.7581	5.9007	GNAZ;CXCL8;HSD3B2;JUP;PRKCB;GNAI2;NFKBIA;FOSL1;NR4A1;TRIM28;GNA11;GNB2;GRK6;AKT1;JUNB;MAPK3
Metabolic Epileptic Disorders WP5355	16/92	17.39	0.0348635	0.220607	1.7581	5.9007	SLC25A1;GAMT;TPI1;SQOR;SLC2A1;ENO1;SLC1A5;ENO2;ENO3;PFKL;PKM;PC;ASL;ALDOA;GAPDH;PFKP
Neural Crest Cell Migration In Cancer WP4565	9/43	20.93	0.0360889	0.226458	2.2085	7.3361	NGFR;JUN;BDNF;AKT2;AKT1;MMP9;EPHB4;F2RL2;PAK4
IL1 And Megakaryocytes In Obesity WP2865	6/24	25	0.037335	0.22672	2.7796	9.139	IRAK1;IL1R1;IL1B;FCER1A;TIMP1;MMP9
Regulation Of Apoptosis By Parathyroid Hormone Related Protein WP3872	6/24	25	0.037335	0.22672	2.7796	9.139	BCL2L12;AKT2;AKT1;BAX;PTHLH;BOK
IL4 Signaling WP395	10/50	20	0.0372752	0.22672	2.0861	6.862	NFKBIA;MAPK11;CEBPB;SHC1;BAD;FES;AKT1;FLNA;TYK2;MAPK3
Regulatory Circuits Of STAT3 Signaling WP4538	14/78	17.95	0.0366778	0.22672	1.8263	6.0369	PDGFRB;DUSP2;PRKCB;SRC;TYK2;MAPK12;RPTOR;MAPK11;TRIM28;AKT1S1;MLST8;MAPK4;F2RL2;MAPK3
IL11 Signaling WP2332	9/44	20.45	0.0412091	0.248244	2.1453	6.8415	PTPA;IL11;MAP2K2;SRC;FES;RPS6KA1;AKT1;TYK2;MAPK3
Mitochondrial Fission And Fusion WP4318	4/13	30.77	0.0427272	0.249408	3.7046	11.6803	FIS1;MTFP1;BNIP3;BAX
Cancer Pathways WP5434	67/507	13.21	0.0419345	0.249408	1.2761	4.0475	CXCL8;SLC2A1;KEAP1;BBC3;RASSF1;AKT2;PIM1;RAC2;AKT1;RAC3;ELOB;IKBKG;PDGFRB;MAP2K2;PRKCB;ITGA3;DAPK2;DAPK3;AXIN1;TRAF2;TRAF1;KIF7;BCR;PAX8;TRAF4;COL4A2;RARA;ARHGEF1;BIRC7;BIRC3;NOTCH1;GSTP1;LRP5;PDGFA;CXCR4;ADCY7;GNAI2;RXRA;GNA11;DVL1;STAT4;HMOX1;PMAIP1;RALGDS;CAMK2G;MAPK3;GSTM4;GSTM3;ZBTB17;JUN;JAG1;JUP;GADD45B;LAMB3;TXNRD2;EGF;LAMB2;BAD;TXNRD1;NFKB2;VEGFA;NFKBIA;GNB2;RPS6KB2;BAX;FGFR4;FGFR3
Male Steroid Hormones In Cardiomyocyte Energy Metabolism WP5320	4/13	30.77	0.0427272	0.249408	3.7046	11.6803	SULT1A1;HSD3B2;AKR1C3;CYP19A1
Osteopontin Signaling WP1434	4/13	30.77	0.0427272	0.249408	3.7046	11.6803	SPP1;MMP9;MAP3K14;MAPK3
Chromosomal And Microsatellite Instability In Colorectal Cancer WP4216	13/73	17.81	0.0454602	0.250776	1.8084	5.5897	JUN;GADD45B;BAD;AXIN1;BBC3;AKT2;RAC2;RAC3;AKT1;PMAIP1;BAX;RALGDS;MAPK3
Glycosylation And Related Congenital Defects WP4521	6/25	24	0.0448166	0.250776	2.6332	8.1766	GMPPB;DPM2;DPM3;ALG12;MOGS;MPDU1
Relationship Between Inflammation COX 2 And EGFR WP4483	6/25	24	0.0448166	0.250776	2.6332	8.1766	SRC;PTGES2;AKT2;AKT1;CYP19A1;MAPK3
Glucose Metabolism In Triple Negative Breast Cancer Cells WP5211	3/8	37.5	0.045626	0.250776	5	15.4364	PKM;SLC2A1;PFKP
Extracellular Vesicles In The Crosstalk Of Cardiac Cells WP4300	5/19	26.32	0.0456239	0.250776	2.9775	9.1924	CD81;EGF;SPP1;HSPB1;MMP9
Pentose Phosphate Pathway In Senescent Cells WP5043	3/8	37.5	0.045626	0.250776	5	15.4364	G6PD;TALDO1;PGLS
Amyotrophic Lateral Sclerosis ALS WP2447	8/38	21.05	0.0453267	0.250776	2.2243	6.8817	CST3;CCS;TOMM40;GPX1;MAP2K2;BAD;BAX;TNFRSF1A
Peroxiredoxin 2 Induced Ovarian Failure WP4873	3/8	37.5	0.045626	0.250776	5	15.4364	PRDX2;HSD3B2;BAX
Nephrotic Syndrome WP4758	9/45	20	0.0467973	0.251798	2.0856	6.3858	CD151;INF2;ITGA3;LAMB2;ARHGDIA;LMNA;MYH9;COQ8B;ACTN4
Cytoplasmic Ribosomal Proteins WP477	15/88	17.05	0.046815	0.251798	1.7154	5.2518	RPLP1;RPS5;RPL8;RPS15;RPS28;RPS19;RPL18A;RPS6KA1;RPS6KB2;RPL36;RPL35;RPLP2;FAU;RPL18;RPS10
TROP2 Regulatory Signaling WP5300	9/45	20	0.0467973	0.251798	2.0856	6.3858	ACVRL1;JUN;NOTCH1;MMP13;SRC;MDK;BAX;ITGA5;PAK4
IL17 Signaling WP2112	7/32	21.88	0.0494437	0.260357	2.3351	7.0214	CEBPB;AKT1;IKBKG;IL17RC;MAP3K14;MAPK3;NFKBIB
PI3K AKT mTOR Signaling And Therapeutic In Prostate Cancer WP3844	7/32	21.88	0.0494437	0.260357	2.3351	7.0214	RPTOR;BAD;MLST8;EIF4EBP1;AKT1;TSC2;ULK1
Metabolic Pathways Of Fibroblasts WP5312	7/32	21.88	0.0494437	0.260357	2.3351	7.0214	BMP1;SLC2A1;SLC1A5;PLOD1;P3H3;FGFR4;LOXL2
Pancreatic Adenocarcinoma Pathway WP4263	15/89	16.85	0.0509491	0.266421	1.6921	5.0374	MAP2K2;GADD45B;EGF;BAD;VEGFA;AKT2;RPS6KB2;RAC2;RAC3;AKT1;BAX;IKBKG;RALGDS;PAK4;MAPK3
EPO Receptor Signaling WP581	6/26	23.08	0.0531672	0.272346	2.5014	7.3399	PTPRU;MAP2K2;SHC1;SRC;AKT1;MAPK3
Chronic Hyperglycemia Impairment Of Neuron Function WP5283	9/46	19.57	0.0528663	0.272346	2.0291	5.9655	MMP12;MMP24;MMP13;PRKCB;BDNF;MMP15;MMP17;SLC2A1;MMP9
Cytokines And Inflammatory Response WP530	6/26	23.08	0.0531672	0.272346	2.5014	7.3399	IL11;IL1A;CSF1;IL1B;PDGFA;CXCL2
Effect Of Omega 3 PUFA On Huntington 39 S Disease Pathways WP5470	19/120	15.83	0.0535336	0.27237	1.571	4.5989	MAP2K2;BDNF;EGF;BAD;NR1H2;BNIP3;TSC2;PRR5L;RPTOR;AKT2;IL1B;AKT1S1;EIF4EBP1;MLST8;AKT1;MAP3K10;BAX;MAP2K7;MAPK3
2Q37 Copy Number Variation Syndrome WP5224	21/136	15.44	0.0553743	0.279844	1.5252	4.4133	GABARAPL1;JUN;DTYMK;DGKD;RNPEPL1;PDGFA;ILK;CXCR4;ERFE;THAP4;NFKBIA;CYTH2;STK25;CAPN10;IL1B;GPC1;ATG4B;D2HGDH;RAMP1;ARF5;BOK
Oxidative Stress Response WP408	7/33	21.21	0.0571755	0.283244	2.2451	6.4248	GPX1;TXNRD2;TXNRD1;GSR;CYP1A1;HMOX1;JUNB
Alpha 6 Beta 4 Signaling WP244	7/33	21.21	0.0571755	0.283244	2.2451	6.4248	LAMB3;SHC1;SRC;LAMB2;EIF4EBP1;AKT1;MAPK3
Fluoropyrimidine Activity WP1601	7/33	21.21	0.0571755	0.283244	2.2451	6.4248	ABCC3;FPGS;XRCC3;ERCC2;UPP1;TK1;TYMP
Selenium Metabolism And Selenoproteins WP28	9/47	19.15	0.0594265	0.288698	1.9756	5.5771	SELENOO;JUN;SELENOM;GPX1;SARS2;GPX4;TXNRD2;TXNRD1;MSRB1
PDGF Pathway WP2526	8/40	20	0.0589966	0.288698	2.085	5.9013	PDGFRB;NFKBIA;JUN;SHC1;SRC;SRF;PDGFA;MAPK3
ATM Signaling In Development And Disease WP3878	9/47	19.15	0.0594265	0.288698	1.9756	5.5771	MAPK11;G6PD;TRIM28;HSPB1;TSC2;IKBKG;LMNB2;RNF40;MAPK12
FGFR3 Signal Chondrocyte Proliferation Terminal Differentiation WP4767	6/27	22.22	0.0623988	0.300751	2.3822	6.6086	MAPK11;MAP2K2;FGFR3;PTHLH;MAPK12;MAPK3
Hemesynthesis Defects And Porphyrias WP5169	3/9	33.33	0.0631058	0.300751	4.1664	11.5116	ALAS1;FECH;UROD
Heme Biosynthesis WP561	3/9	33.33	0.0631058	0.300751	4.1664	11.5116	ALAS1;FECH;UROD
DYRK1A Involvement Regarding Cell Prolif In Brain Development WP5180	11/62	17.74	0.0638551	0.302408	1.7995	4.9506	RPTOR;PSENEN;NOTCH1;TFAP4;LIN37;DNER;AKT1S1;MLST8;TSC2;E2F4;DNM1
Gastrin Signaling WP4659	18/115	15.65	0.0646888	0.304442	1.5493	4.2422	JUN;JAG1;CXCL8;SERPINB2;SHC1;SRC;BAD;SERPINE1;RHOB;HDAC7;VEGFA;NFKBIA;EIF4EBP1;AKT1;MAP3K11;BCAR1;BIRC3;MAPK3
Fatty Acid Beta Oxidation WP143	7/34	20.59	0.0656137	0.306876	2.1619	5.8889	ACADVL;CHKB;TPI1;ECI1;ACADS;CRAT;PNPLA2
Glucocorticoid Receptor Pathway WP2880	12/70	17.14	0.0677912	0.307945	1.7263	4.646	SRGN;IL11;JUN;RXRA;GADD45B;CCL20;ETNK2;DNER;LRRC8A;MFGE8;BIRC3;NFKB2
Pro Survival Signaling Of Neuroprotectin D1 WP5182	4/15	26.67	0.0687048	0.307945	3.0307	8.116	BAX;TRAF2;TNFRSF1A;BIRC3
Nucleotide Binding Oligomerization Domain NOD Pathway WP1433	8/41	19.51	0.0667071	0.307945	2.0218	5.4738	PYCARD;NFKBIA;NDUFA13;NLRP4;IL1B;NLRP1;IKBKG;AAMP
GPR40 Pathway WP3958	4/15	26.67	0.0687048	0.307945	3.0307	8.116	GNA11;PLCD3;PKD1;PLCD1
GNAQ Pathways In Port Wine Stain WP5437	5/21	23.81	0.0668271	0.307945	2.605	7.0482	MAP2K3;MAP2K2;AKT1;MAP2K7;MAPK3
Iron Sulfur Cluster Biogenesis WP5152	4/15	26.67	0.0687048	0.307945	3.0307	8.116	FDXR;CIAO2B;NUBP1;NUBP2
Thermogenesis WP4321	17/108	15.74	0.0681066	0.307945	1.5595	4.1898	MAP2K3;SMARCD3;TSC2;SIRT6;CPT1C;ADCY7;MAPK12;RPTOR;CREB3;MAPK11;SLC25A29;DPF1;RPS6KA1;AKT1S1;RPS6KB2;MLST8;PNPLA2
Focal Adhesion PI3K Akt mTOR Signaling WP3932	41/303	13.53	0.0705488	0.31249	1.3085	3.4694	CRTC2;PFKFB4;CSF1;SLC2A1;PDGFA;RPTOR;AKT2;SPP1;EIF4EBP1;ITGAX;MLST8;AKT1;IKBKG;PELO;MAPK3;PDGFRB;NGFR;MAP2K2;VWF;LAMB3;ITGA3;EGF;LAMB2;BAD;TSC2;VEGFA;RAB11B;CREB3;EFNA3;COL4A2;CDC37;GNB2;COL5A3;COL6A2;AKT1S1;RPS6KB2;ULK1;ITGA5;FGFR4;FGFR3;EPHA2
Endometrial Cancer WP4155	11/63	17.46	0.0702058	0.31249	1.7648	4.6878	MAP2K2;GADD45B;BAD;EGF;AKT2;AXIN1;ILK;AKT1;BAX;FGFR3;MAPK3
Smith Magenis And Potocki Lupski Syndrome Copy Number Variation WP5381	23/156	14.74	0.0715494	0.315068	1.4443	3.809	JUN;MIGA2;FHOD1;FLII;GPS1;NR1H2;LIMK1;CLTB;MIEF2;RPTOR;RAI1;ATG101;IL1B;MLST8;PEMT;IFT27;DRG2;BAX;ULK1;NT5M;APBB1;MAP3K14;LLGL1
11P11 2 Copy Number Variation Syndrome WP5348	10/56	17.86	0.0723535	0.31563	1.8134	4.7622	LGALS3BP;CD53;PEX16;CD151;CD82;ITGA3;CHST1;ALX4;TIMP1;TP53I11
Dravet Syndrome WP5200	6/28	21.43	0.0725152	0.31563	2.2737	5.9662	PRR5;MAPK11;MLST8;AKT1;PRR5L;SCN2A
Parkin Ubiquitin Proteasomal System Pathway WP2359	12/71	16.9	0.073986	0.320181	1.6969	4.4186	PSMD8;TUBA1C;TUBB6;TUBB2B;TUBB2A;PSMC3;TUBB3;PSMC4;PSMD3;STUB1;TUBB4B;TUBA4A
miRNA Targets In ECM And Membrane Receptors WP2911	5/22	22.73	0.0791621	0.338688	2.4516	6.2179	COL4A2;LAMB2;COL6A2;COL5A3;COL6A1
NAD Metab In Oncogene Induced And Mt Dysfunction Senescence WP5046	5/22	22.73	0.0791621	0.338688	2.4516	6.2179	G6PD;IL1B;SLC2A1;HMGA1;SIRT2
Mitochondrial Complex III Assembly WP4921	4/16	25	0.0841268	0.338757	2.778	6.8767	UQCC3;UQCRC1;UQCR11;CYC1
Photodynamic Therapy Induced AP 1 Survival Signaling WP3611	9/50	18	0.0821233	0.338757	1.8307	4.5759	MAP2K3;MAPK11;JUN;BAX;TRAF2;MAP2K7;JUNB;MAPK12;TNFRSF1A
8Q11 23 RB1CC1 Copy Number Variation WP5412	4/16	25	0.0841268	0.338757	2.778	6.8767	GABARAPL1;ATG101;TRAF2;ULK1
MAPK Pathway In Congenital Thyroid Cancer WP4928	4/16	25	0.0841268	0.338757	2.778	6.8767	JUN;MAP2K2;SHC1;MAPK3
PDGFR Beta Pathway WP3972	6/29	20.69	0.0835118	0.338757	2.1748	5.3994	PDGFRB;JUN;SHC1;PRKCB;SRF;MAPK3
NAD Metabolism WP3644	4/16	25	0.0841268	0.338757	2.778	6.8767	SIRT6;SIRT7;SIRT2;NADK
Sulfation Biotransformation Reaction WP692	4/16	25	0.0841268	0.338757	2.778	6.8767	SULT1A1;G6PD;GSR;SULT1A2
N Glycan Biosynthesis WP5153	10/57	17.54	0.079715	0.338757	1.7747	4.4887	GMPPB;DPM2;DPM3;MGAT5B;DOLPP1;GMPPA;MGAT4B;ALG12;MOGS;MPDU1
Interleukin 1 Induced Activation Of NF kB WP3656	3/10	30	0.0831718	0.338757	3.571	8.8806	IL1A;IRAK1;SQSTM1
Aspirin And miRNAs WP4707	3/10	30	0.0831718	0.338757	3.571	8.8806	MVD;PTGS1;VEGFA
Acquired Partial Lipodystrophy Barraquer Simons Syndrome WP5104	3/10	30	0.0831718	0.338757	3.571	8.8806	LMNA;RCE1;LMNB2
Factors And Pathways Affecting IGF1 Akt Signaling WP3850	7/36	19.44	0.0846223	0.33894	2.0125	4.9701	RPTOR;AKT1S1;MLST8;ILK;AKT1;TNFSF9;TNFRSF1A
Head And Neck Squamous Cell Carcinoma WP4674	12/73	16.44	0.0874313	0.348337	1.6411	3.9992	RPTOR;NOTCH1;AKT2;RPS6KB2;MLST8;EIF4EBP1;KEAP1;AKT1;TSC2;FGFR3;VEGFA;NFKB2
Wnt B Catenin Signaling Inhibitors Current Past Clinical Trials WP5442	2/5	40	0.0922583	0.36372	5.5536	13.2351	PORCN;LRP5
SARS CoV 2 Altering Angiogenesis Via NRP1 WP5065	2/5	40	0.0922583	0.36372	5.5536	13.2351	FURIN;VEGFA
Familial Partial Lipodystrophy WP5102	6/30	20	0.0953762	0.370197	2.084	4.8973	AKT2;LMNA;GATA2;LMNB2;KLF2;PNPLA2
Autophagy WP4923	6/30	20	0.0953762	0.370197	2.084	4.8973	RPTOR;ATG101;ATG9A;AKT1S1;MLST8;ULK1
IL5 Signaling WP127	7/37	18.92	0.0951868	0.370197	1.9454	4.5753	JUN;MAP2K2;SHC1;RPS6KA1;RPS6KB2;AKT1;MAPK3
Involvement Of Secretase In Neurodegenerative Diseases WP5372	4/17	23.53	0.101074	0.384389	2.5642	5.8768	CEBPB;BDNF;AKT2;AKT1
NOTCH1 Regulation Of Endothelial Cell Calcification WP3413	4/17	23.53	0.101074	0.384389	2.5642	5.8768	NOTCH1;JAG1;FGFR3;VEGFA
Mitochondrial Long Chain Fatty Acid Beta Oxidation WP368	4/17	23.53	0.101074	0.384389	2.5642	5.8768	ACADVL;ECI1;ACADS;ACSF2
ERK Pathway In Huntington 39 S Disease WP3853	4/17	23.53	0.101074	0.384389	2.5642	5.8768	MAP2K2;EGF;BDNF;MAPK3
miRNA Regulation Of Prostate Cancer Signaling WP3981	6/31	19.35	0.108089	0.391301	2.0006	4.4509	PDGFRB;NFKBIA;MAP2K2;BAD;PDGFA;IKBKG
Toll Like Receptor Signaling Related To MyD88 WP3858	6/31	19.35	0.108089	0.391301	2.0006	4.4509	IRAK1;IRF3;IKBKG;IKBKE;RELB;NFKB2
Eicosanoid Metabolism Via Cyclooxygenases COX WP4719	6/31	19.35	0.108089	0.391301	2.0006	4.4509	TBXAS1;ACOX3;PLA2G6;PTGR1;PTGS1;PTGES
Constitutive Androstane Receptor Pathway WP2875	6/31	19.35	0.108089	0.391301	2.0006	4.4509	SULT1A1;PTPA;ABCC3;ALAS1;RXRA;ABCC2
Acute Myeloid Leukemia WP5293	11/68	16.18	0.107849	0.391301	1.6095	3.5844	MAP2K2;JUP;BAD;AKT2;RPS6KB2;PIM1;RARA;EIF4EBP1;AKT1;IKBKG;MAPK3
miRNA Regulation Of P53 Pathway In Prostate Cancer WP3982	5/24	20.83	0.107173	0.391301	2.1933	4.8983	SERPINE1;SHISA5;BAX;PMAIP1;BBC3
Nuclear Receptors WP170	7/38	18.42	0.106446	0.391301	1.8825	4.217	ESRRA;NR4A1;RXRA;NR1H2;RARA;NR0B1;NR2F6
2Q13 Copy Number Variation Syndrome WP5222	10/60	16.67	0.104464	0.391301	1.6679	3.7677	CHCHD5;IL1A;CSF1;IL1R1;PSD4;IL1B;POLR2E;POLR2F;GAS6;POLR2L
Physiological And Pathological Hypertrophy Of The Heart WP1528	5/24	20.83	0.107173	0.391301	2.1933	4.8983	MAP2K3;MAPK11;JUN;PRKCB;NFATC4
Adipogenesis WP236	19/131	14.5	0.106754	0.391301	1.4158	3.1675	CEBPB;GADD45B;SERPINE1;HMGA1;LIF;GATA2;AGPAT2;BSCL2;CYP26A1;CYP26B1;BMP1;RXRA;DVL1;LMNA;RARA;ID3;TRIB3;E2F4;LPIN3
Kit Receptor Signaling WP304	9/53	16.98	0.109383	0.394094	1.7056	3.7743	DOK1;MAP2K2;PRKCB;SHC1;SRC;BAD;RPS6KA1;AKT1;MAPK3
Urotensin II Mediated Signaling WP5158	11/69	15.94	0.116555	0.417932	1.5817	3.3996	HDAC5;IRF3;AIFM2;IL1B;FSCN1;AKT1;HMOX1;BAX;CYBA;MMP9;MAPK3
Interactions Between LOXL4 And Oxidative Stress Pathway WP3670	4/18	22.22	0.119449	0.42155	2.3809	5.059	SUV39H1;CDC37;ECSIT;PKD1
Proteoglycan Biosynthesis WP4784	4/18	22.22	0.119449	0.42155	2.3809	5.059	CANT1;B3GAT3;XYLT2;B4GALT7
Embryonic Stem Cell Pluripotency Pathways WP3931	17/117	14.53	0.120428	0.42155	1.4184	3.0023	PDGFRB;MAP2K3;JUN;MAP2K2;EGF;LIF;AXIN1;LRP5;PDGFA;MAPK12;SMAD7;AKT2;DVL1;AKT1;FGFR4;FGFR3;MAPK4
Initiation Of Transcription And Translation Elongation HIV1 LTR WP3414	6/32	18.75	0.121622	0.42155	1.9235	4.0525	NFKBIA;HDAC5;NELFB;NELFA;HDAC7;NFATC4
Estrogen Metabolism WP697	4/18	22.22	0.119449	0.42155	2.3809	5.059	SULT1A1;ARSL;CYP1A1;COMT
Acute Viral Myocarditis WP4298	13/85	15.29	0.119855	0.42155	1.506	3.195	SRC;KRT8;ILK;CXCR4;MMP9;NFKB2;PYCARD;RAC2;RAC3;AKT1;BAX;CD55;MAPK3
T Cell Antigen Receptor TCR Pathway During Staph A. Infection WP3863	10/62	16.13	0.123162	0.42155	1.6036	3.3583	NFKBIA;JUN;MAP2K2;RRAS;AKT1;IKBKG;MAP2K7;MAP3K14;LAT;MAPK3
Regulation Of Actin Cytoskeleton WP51	21/150	14	0.123139	0.42155	1.3586	2.8455	PDGFRB;MAP2K2;EGF;ACTN1;LIMK1;PDGFA;BAIAP2;SSH3;RRAS;RAC2;RAC3;ARHGEF1;CSK;PIP5K1C;FGFR4;FGFR3;GIT1;MAPK4;BCAR1;PAK4;MAPK3
Hypothesized Pathways In Pathogenesis Of Cardiovascular Disease WP3668	5/25	20	0.122762	0.42155	2.0835	4.3702	SHC1;SERPINE1;FLNA;LTBP2;MAPK3
Monoamine Transport WP727	6/32	18.75	0.121622	0.42155	1.9235	4.0525	IL1R1;TGFB1I1;IL1B;TSC2;STX1A;NECTIN2
miRNA Biogenesis WP2338	2/6	33.33	0.128789	0.427602	4.165	8.5364	DGCR8;TARBP2
Enterohepatic Circulation Of Bile Acids WP5396	3/12	25	0.130005	0.427602	2.7772	5.6659	ABCC3;ABCC2;SLC51B
Vitamin A1 And A5 X Pathways WP5397	2/6	33.33	0.128789	0.427602	4.165	8.5364	RXRA;RARA
Arylamine Metabolism WP694	2/6	33.33	0.128789	0.427602	4.165	8.5364	SULT1A1;SULT1A2
ROBO4 And VEGF Signaling Crosstalk WP3943	2/6	33.33	0.128789	0.427602	4.165	8.5364	SRC;VEGFA
Mir 124 Predicted Interactions W Cll Cycle And Differentiation WP3595	2/6	33.33	0.128789	0.427602	4.165	8.5364	PTBP1;CTDSP1
Biomarkers For Urea Cycle Disorders WP4583	3/12	25	0.130005	0.427602	2.7772	5.6659	GAMT;ASL;NAGS
Pathogenic Escherichia Coli Infection WP2272	9/55	16.36	0.130041	0.427602	1.6313	3.3276	TUBA1C;TUBB6;TUBB2B;TUBB2A;KRT18;TUBB3;LY96;TUBB4B;TUBA4A
IL10 Anti Inflammatory Signaling WP4495	3/12	25	0.130005	0.427602	2.7772	5.6659	IL1A;BLVRB;HMOX1
Warburg Effect Mod By Deubiquitinating Enzymes And Substrates WP5216	5/26	19.23	0.139332	0.438984	1.9842	3.9107	U2AF2;SLC2A1;AKT1;SIRT7;VEGFA
TP53 Network WP1742	4/19	21.05	0.139135	0.438984	2.222	4.3825	BAX;PMAIP1;BBC3;BOK
Host Pathogen Interaction Of Human CoV Interferon Induction WP4880	6/33	18.18	0.135943	0.438984	1.8522	3.696	NFKBIA;JUN;IRF3;IKBKG;TYK2;IKBKE
Mitochondrial Fatty Acid Oxidation Disorders WP5123	4/19	21.05	0.139135	0.438984	2.222	4.3825	ACADVL;ECI1;ACADS;ACSF2
Overview Of Nanoparticle Effects WP3287	4/19	21.05	0.139135	0.438984	2.222	4.3825	CXCL8;HMOX1;BAX;PTGS1
BDNF TrkB Signaling WP3676	6/33	18.18	0.135943	0.438984	1.8522	3.696	SHC1;BDNF;RPS6KA1;EIF4EBP1;AKT1;TSC2
Spinal Cord Injury WP2431	17/119	14.29	0.134618	0.438984	1.3904	2.7883	NGFR;CXCL8;IL1R1;BDNF;PLA2G6;RHOC;CXCL2;MMP9;RHOB;EFNB2;MMP12;NR4A1;IL1A;MAG;GAP43;IL1B;MAPK3
Cholestasis WP5238	4/19	21.05	0.139135	0.438984	2.222	4.3825	ABCC3;ABCC2;RXRA;EPHX1
Mitochondrial Immune Response To SARS CoV 2 WP5038	6/33	18.18	0.135943	0.438984	1.8522	3.696	NLRX1;IRF3;CTSL;ECSIT;IKBKE;NFKB2
LTF Danger Signal Response Pathway WP4478	4/19	21.05	0.139135	0.438984	2.222	4.3825	IL1A;CXCL8;IRAK1;IL1B
Mitochondrial Complex I Assembly Model OXPHOS System WP4324	9/56	16.07	0.141088	0.442663	1.5965	3.1265	NDUFA13;NDUFA7;NDUFB7;NDUFS6;DMAC2;NDUFB4;ECSIT;NDUFV1;FOXRED1
Glycosaminoglycan Synthesis In Fibroblasts WP5395	7/41	17.07	0.144213	0.450592	1.7161	3.3232	CHPF;B3GAT3;CHPF2;XYLT2;CHST1;HS6ST1;B4GALT7
Non Small Cell Lung Cancer WP4255	11/72	15.28	0.144961	0.451055	1.5036	2.904	RASSF1;MAP2K2;RXRA;GADD45B;PRKCB;BAD;EGF;AKT2;AKT1;BAX;MAPK3
T Cell Activation SARS CoV 2 WP5098	13/88	14.77	0.145581	0.451121	1.4455	2.7856	JUN;MAP2K2;TSC2;TYK2;RPTOR;NFKBIA;MLST8;STAT4;AKT1;BAX;IKBKG;LAT;MAPK3
Hepatitis C And Hepatocellular Carcinoma WP3646	8/49	16.33	0.149417	0.461111	1.6265	3.0921	UCHL1;JUN;CXCL8;COL4A2;AKT1;BIRC3;MAPK3;VEGFA
Electron Transport Chain OXPHOS System In Mitochondria WP111	15/105	14.29	0.152718	0.464894	1.3901	2.6121	COX8A;NDUFA13;NDUFA7;NDUFB7;NDUFA11;NDUFB4;COX17;UQCR11;COX5B;ATP5F1D;ATP5F1E;NDUFS8;NDUFS6;UQCRC1;NDUFV1
Mammary Gland Development Pathway Puberty Stage 2 Of 4 WP2814	3/13	23.08	0.156188	0.464894	2.4993	4.6404	FOSL1;EGF;TIMP1
Transcriptional Cascade Regulating Adipogenesis WP4211	3/13	23.08	0.156188	0.464894	2.4993	4.6404	CEBPB;GATA2;KLF2
Disorders Of Galactose Metabolism WP5173	3/13	23.08	0.156188	0.464894	2.4993	4.6404	GALE;GBE1;GALK1
Proximal Tubule Transport WP4917	9/57	15.79	0.152595	0.464894	1.5631	2.9386	ATP6V0B;SLC12A4;ABCC2;SLC2A1;SLC3A2;SLC4A2;ATP6V0C;SLC26A6;ATP6V1F
Neurogenesis Regulation In The Olfactory Epithelium WP5265	9/57	15.79	0.152595	0.464894	1.5631	2.9386	NGFR;NUMBL;NOTCH1;JAG1;BDNF;MAP1B;ID1;NRG1;AGRN
Lactate Shuttle In Glial Cells WP5314	3/13	23.08	0.156188	0.464894	2.4993	4.6404	SLC2A1;NUDT14;SLC16A3
Purine Metabolism WP4792	3/13	23.08	0.156188	0.464894	2.4993	4.6404	IMPDH1;ADA;APRT
Intracellular Trafficking Proteins Involved In CMT Neuropathy WP4856	5/27	18.52	0.156817	0.464894	1.8939	3.5088	HSPB8;HSPB1;RABAC1;NDRG1;RAB11B
7 Oxo C And 7 Beta HC Pathways WP5064	5/27	18.52	0.156817	0.464894	1.8939	3.5088	CYP27A1;ACOT8;ACOT7;ACOT11;ACOT13
Eukaryotic Transcription Initiation WP405	7/42	16.67	0.158054	0.464901	1.667	3.0753	ERCC2;POLR2E;ILK;POLR2F;TAF6;POLR2I;POLR2J
Metabolic Reprogramming In Pancreatic Cancer WP5220	7/42	16.67	0.158054	0.464901	1.667	3.0753	BCKDHA;SLC7A5;PFKL;PKM;SLC2A1;SLC1A5;BCAT2
IL7 Signaling WP205	4/20	20	0.160008	0.467	2.083	3.8172	MAP2K2;BAD;AKT1;MAPK3
Hypertrophy Model WP516	4/20	20	0.160008	0.467	2.083	3.8172	IL1A;IL1R1;EIF4EBP1;VEGFA
Glial Cell Differentiation WP2276	2/7	28.57	0.167928	0.473594	3.3318	5.9446	GAP43;MAG
16P11 2 Proximal Deletion Syndrome WP4949	11/74	14.86	0.165728	0.473594	1.4557	2.6166	MAP2K3;INO80E;PPP4C;HIRIP3;MVP;MAZ;TAOK2;TRAF2;KIF22;ALDOA;MAPK3
Cytosolic DNA Sensing Pathway WP4655	11/74	14.86	0.165728	0.473594	1.4557	2.6166	PYCARD;NFKBIA;NLRX1;IRF3;IL1B;POLR2E;POLR2F;IKBKG;IKBKE;POLR2L;NFKBIB
Prolactin Signaling WP2037	11/74	14.86	0.165728	0.473594	1.4557	2.6166	NFKBIA;JUN;MAP2K2;SHC1;SRC;EIF4EBP1;AKT1;FLNA;CTSD;MAPK3;NFKBIB
Activation Of NLRP3 Inflammasome By SARS CoV 2 WP4876	2/7	28.57	0.167928	0.473594	3.3318	5.9446	PYCARD;IL1B
Nanomaterial Induced Inflammasome Activation WP3890	2/7	28.57	0.167928	0.473594	3.3318	5.9446	PYCARD;IL1B
Arachidonate Epoxygenase Epoxide Hydrolase WP678	2/7	28.57	0.167928	0.473594	3.3318	5.9446	COX8A;GSTP1
Hfe Effect On Hepcidin Production WP3924	2/7	28.57	0.167928	0.473594	3.3318	5.9446	ID1;SMAD7
Complement And Coagulation Cascades WP558	9/58	15.52	0.164547	0.473594	1.5311	2.763	VWF;C1S;SERPIND1;C1R;F12;SERPINE1;PLAUR;CLU;CD55
Copper Homeostasis WP3286	8/51	15.69	0.175543	0.493223	1.5507	2.698	PRNP;MT2A;JUN;CCS;SLC31A2;COX17;AKT1;ATOX1
Dengue 2 Interactions With Complement And Coagulation Cascades WP3896	9/59	15.25	0.176927	0.494119	1.5004	2.5988	VWF;C1S;SERPIND1;C1R;F12;SERPINE1;PLAUR;CLU;CD55
AMP Activated Protein Kinase Signaling WP1403	10/67	14.93	0.177174	0.494119	1.4625	2.531	RPTOR;CRTC2;AKT2;RPS6KB2;EIF4EBP1;AKT1;TSC2;CPT1C;CAMKK1;SLC2A4RG
Glycosphingolipid Metabolism WP5292	4/21	19.05	0.181933	0.503322	1.9604	3.3407	ARSA;B4GALNT1;A4GALT;GLA
Vitamin D Sensitive Calcium Signaling In Depression WP4698	6/36	16.67	0.183224	0.503322	1.6667	2.8284	CYP27A1;G6PD;RXRA;GSR;KCNQ3;GGT1
Kennedy Pathway From Sphingolipids WP3933	3/14	21.43	0.183816	0.503322	2.272	3.8483	CHKB;ETNK2;PEMT
Glucocorticoid Biosynthesis WP5280	3/14	21.43	0.183816	0.503322	2.272	3.8483	CBR1;AKR1C1;AKR1C3
Disorders Of Fructose Metabolism WP5178	3/14	21.43	0.183816	0.503322	2.272	3.8483	PFKL;TPI1;GLYCTK
EGF EGFR Signaling WP437	21/159	13.21	0.185386	0.50578	1.2693	2.1392	NDUFA13;JUN;MAP2K2;PRKCB;SHC1;SRC;EGF;TNK2;AP2A1;DNM1;EPN1;HGS;RPS6KA1;EIF4EBP1;AKT1;ARHGEF1;CSK;RIN1;RALGDS;MAPK4;BCAR1
Polycystic Kidney Disease Pathway WP2571	12/84	14.29	0.186128	0.505972	1.3895	2.3362	JUN;MAP2K2;SRC;EGF;GNA11;RPS6KA1;DVL1;TSC2;KCNN4;PKD1;GNAI2;MAPK3
Genes Controlling Nephrogenesis WP4823	7/44	15.91	0.187433	0.507686	1.5767	2.6399	PDGFRB;FOXD1;ITGA3;LAMB2;ILK;CXCR4;VEGFA
Netrin UNC5B Signaling WP4747	8/52	15.38	0.189316	0.510197	1.5154	2.5221	PTPA;IL1A;JUN;MAP2K2;SRC;AKT1;MAPK3;PPP1CA
Oxidative Phosphorylation WP623	9/60	15	0.189715	0.510197	1.4709	2.445	NDUFA7;NDUFS8;NDUFB7;NDUFA11;NDUFS6;NDUFB4;NDUFV1;ATP5F1D;ATP5F1E
Epithelial To Mesenchymal Transition In Colorectal Cancer WP4239	21/160	13.12	0.193156	0.517602	1.2601	2.072	MAP2K3;MAP2K2;NOTCH1;JAG1;JUP;SHC1;GDF15;LRP5;PKD1;MMP9;MAPK12;MAPK11;CLDN4;COL4A2;CTDSP1;MMP15;AKT2;ID1;AKT1;ITGA5;MAPK3
Lipid Metabolism Pathway WP3965	5/29	17.24	0.194233	0.518644	1.7359	2.8446	BCKDHA;PRKAR1B;AKT2;AKT1;PNPLA2
Blood Clotting Cascade WP272	4/22	18.18	0.204771	0.523825	1.8514	2.936	SERPINB2;VWF;F12;SERPINE1
NAD Biosynthetic Pathways WP3645	4/22	18.18	0.204771	0.523825	1.8514	2.936	SIRT6;SIRT7;NADSYN1;SIRT2
Vitamin D In Inflammatory Diseases WP4482	4/22	18.18	0.204771	0.523825	1.8514	2.936	MAP2K3;NFKBIA;RXRA;IKBKG
PI3K AKT mTOR Vitamin D3 Signaling WP4141	4/22	18.18	0.204771	0.523825	1.8514	2.936	PFKFB4;RXRA;TSC2;AKT1
Glycerolipids And Glycerophospholipids WP4722	4/22	18.18	0.204771	0.523825	1.8514	2.936	CHKB;DGAT1;PEMT;PNPLA2
Synthesis Of Ceramides And 1 Deoxyceramides WP5194	4/22	18.18	0.204771	0.523825	1.8514	2.936	DGAT1;SPHK1;B4GALNT1;A4GALT
Apoptosis Related Network Due To Altered Notch3 Ovarian Cancer WP2864	8/53	15.09	0.203526	0.523825	1.4816	2.3587	AXIN1;HSPB1;AKT1;NRG1;TRAF1;PKN1;SQSTM1;SMAD7
Prostaglandin Synthesis And Regulation WP98	7/45	15.56	0.2029	0.523825	1.5351	2.4486	CBR1;AKR1C1;TBXAS1;AKR1C3;S100A6;PTGS1;PTGES
Cell Differentiation Index WP2029	2/8	25	0.208695	0.523825	2.7763	4.3502	HDAC5;SRF
Canonical NF kB Pathway WP4562	2/8	25	0.208695	0.523825	2.7763	4.3502	NFKBIA;IKBKG
EPAC1 And PKA Reduction Of Retinal Inflammation WP5440	2/8	25	0.208695	0.523825	2.7763	4.3502	PRKAR1B;IL1B
Biosynthesis And Turnover Of 1 Deoxy Sphingoid Bases WP5179	2/8	25	0.208695	0.523825	2.7763	4.3502	SPHK2;SPHK1
ApoE And miR 146 In Inflammation And Atherosclerosis WP3926	2/8	25	0.208695	0.523825	2.7763	4.3502	IRAK1;NFKB2
Transcription Factors Regulate miRNAs Cardiac Hypertrophy WP1559	2/8	25	0.208695	0.523825	2.7763	4.3502	AKT2;AKT1
Hippo YAP Signaling WP4537	4/22	18.18	0.204771	0.523825	1.8514	2.936	MAP4K2;RASSF1;NDRG1;TEAD3
Sildenafil Treatment WP5294	4/22	18.18	0.204771	0.523825	1.8514	2.936	AKT2;ZNF746;AKT1;GAPDH
NAD Biosynthesis II From Tryptophan WP2485	2/8	25	0.208695	0.523825	2.7763	4.3502	KYNU;NADSYN1
Dual Hijack Model Of Vif In HIV Infection WP3300	2/8	25	0.208695	0.523825	2.7763	4.3502	APOBEC3G;ELOB
RIOK1 And RIOK2 In EGFR And PI3K Mediated Tumorigenesis WP3873	3/15	20	0.212594	0.530077	2.0825	3.2245	AKT2;MLST8;AKT1
Biomarkers For Pyrimidine Metabolism Disorders WP4584	3/15	20	0.212594	0.530077	2.0825	3.2245	NT5C;PUS1;TYMP
Brain Derived Neurotrophic Factor BDNF Signaling WP2380	18/137	13.14	0.2141	0.532071	1.2613	1.944	NGFR;JUN;MAP2K2;SHC1;BDNF;SRC;BAD;RHOG;TSC2;NFATC4;NFKBIA;RPS6KA1;EIF4EBP1;AKT1;IKBKG;SQSTM1;SH2B1;MAPK3
TYROBP Causal Network In Microglia WP3945	9/62	14.52	0.216428	0.534328	1.4153	2.166	PYCARD;GPX1;ELF4;RPS6KA1;ITGAX;SPP1;CAPG;TCIRG1;SLC1A5
Proteasome Degradation WP183	9/62	14.52	0.216428	0.534328	1.4153	2.166	PSMD8;PSMB6;UCHL1;PSMB5;PSMC3;PSMC4;PSMD3;PSMB10;PSMA7
Interferon Type I Signaling WP585	8/54	14.81	0.218144	0.536806	1.4493	2.2067	RPTOR;RPS6KA4;MAP2K3;PRMT1;MLST8;STAT4;EIF4EBP1;TYK2
Ciliary Landscape WP4352	27/215	12.56	0.219256	0.537784	1.198	1.8179	DYNC2I2;GDI1;ZMYND19;SSNA1;ANKS3;MYL6B;AGPAT2;PSMD8;RMND5B;EXOSC4;DNPEP;ARHGDIA;TNKS1BP1;TMED1;EIPR1;IFT140;RHBDD2;MYL6;RABEP2;PSMC4;ERF;CD2BP2;IFT27;MCM5;DYNLRB1;GLA;MCM2
Post COVID Neuroinflammation WP5485	4/23	17.39	0.228381	0.554744	1.7538	2.59	IL1A;CXCL8;IL1B;FURIN
Unfolded Protein Response WP4925	4/23	17.39	0.228381	0.554744	1.7538	2.59	PPP1R15A;IL1B;PMAIP1;BBC3
Leptin Signaling WP2034	10/71	14.08	0.226998	0.554744	1.3663	2.026	MAP2K2;SHC1;SRC;BAD;RPS6KA1;EIF4EBP1;AKT1;IKBKG;SH2B1;MAPK3
Chemokine Signaling WP3929	21/165	12.73	0.234313	0.567324	1.216	1.7646	PRKCB;SHC1;CCL20;CXCR4;ADCY7;CX3CL1;GNAI2;TIAM2;NFKBIA;GRK2;AKT2;GNB2;GRK6;RAC2;AKT1;CSK;IKBKG;BCAR1;NFKBIB;MAPK3;CCL26
Kisspeptin Kisspeptin Receptor System In The Ovary WP4871	6/39	15.38	0.23594	0.567612	1.5149	2.1878	MAP2K2;PRKCB;AKT2;AKT1;MMP9;MAPK3
Immune Infiltration In Pancreatic Cancer WP5285	6/39	15.38	0.23594	0.567612	1.5149	2.1878	CXCL8;LGALS1;CCL20;IL1B;MMP9;VEGFA
Classcl Pathway Steroidogenesis W Glucocort Mineralocort Metab WP4523	3/16	18.75	0.24224	0.573748	1.9222	2.7254	POR;HSD3B2;CYP19A1
Suppression Of HMGB1 Mediated Inflammation By THBD WP4479	2/9	22.22	0.250292	0.573748	2.3796	3.296	NFKBIA;IKBKG
Altered Glycosylation Of MUC1 In Tumor Microenvironment WP4480	2/9	22.22	0.250292	0.573748	2.3796	3.296	NFKBIA;IKBKG
Somitogenesis In The Context Of Spondylocostal Dysostosis WP4785	2/9	22.22	0.250292	0.573748	2.3796	3.296	LFNG;NOTCH1
SARS CoV 2 B 1 1 7 Variant Antagonises Innate Immune Activation WP5116	2/9	22.22	0.250292	0.573748	2.3796	3.296	IRF3;IKBKE
Ras Signaling WP4223	23/184	12.5	0.248451	0.573748	1.1912	1.6587	PDGFRB;NGFR;MAP2K2;PRKCB;SHC1;BAD;PLA2G6;RASSF1;RRAS;AKT2;GNB2;RAC2;AKT1;RAC3;IKBKG;RIN1;FGFR4;RALGDS;FGFR3;LAT;EPHA2;PAK4;MAPK3
3Q29 Copy Number Variation Syndrome WP4906	9/64	14.06	0.244501	0.573748	1.3636	1.9207	DYNC2I2;TM4SF19;JUN;H2BC21;MCRS1;ZNF76;MELTF;DYNLRB1;SLC51B
ID Signaling WP53	3/16	18.75	0.24224	0.573748	1.9222	2.7254	PAX8;ID1;ID3
Acetaminophen In Analgesia And Antipyresis WP5444	2/9	22.22	0.250292	0.573748	2.3796	3.296	KCNQ3;PTGS1
Pregnane X Receptor Pathway WP2876	5/32	15.62	0.255253	0.573748	1.5427	2.1066	ABCC3;SRPX2;RXRA;ABCC2;SRC
2Q11 2 Copy Number Variation Syndrome WP5221	5/32	15.62	0.255253	0.573748	1.5427	2.1066	ANKRD39;DUSP2;PLXNB2;CIAO2B;MAPK3
White Fat Cell Differentiation WP4149	5/32	15.62	0.255253	0.573748	1.5427	2.1066	CEBPB;IRF3;RARA;GATA2;KLF2
Oxidative Damage Response WP3941	6/40	15	0.254462	0.573748	1.4703	2.0122	C1S;C1R;BAD;TNK2;TRAF2;TRAF1
13Q12 12 Copy Number Variation WP5406	5/32	15.62	0.255253	0.573748	1.5427	2.1066	MAG;TRAF2;FLNC;TRAF1;SNTA1
Urea Cycle And Related Diseases WP4571	2/9	22.22	0.250292	0.573748	2.3796	3.296	ASL;NAGS
Steroid Hormone Precursor Biosynthesis WP5277	2/9	22.22	0.250292	0.573748	2.3796	3.296	HSD3B2;AKR1C1
Neuroinflammation And Glutamatergic Signaling WP5083	18/140	12.86	0.241891	0.573748	1.2301	1.7458	PRKCB;IL1R1;BDNF;LIF;SLC2A1;CAMKK1;SMAD7;NFKB2;TNFRSF1A;PPP1CA;IL1A;IL1B;AKT1;LRRC8A;CAMK2G;LRRC8E;TRPM4;MAPK3
Angiogenesis WP1539	4/24	16.67	0.252622	0.573748	1.666	2.2922	SRC;AKT1;MMP9;VEGFA
Effects Of MFN2 Mutation WP5443	4/24	16.67	0.252622	0.573748	1.666	2.2922	DYNC2I2;TUBB3;BAX;RABAC1
Triacylglyceride Synthesis WP325	4/24	16.67	0.252622	0.573748	1.666	2.2922	DGAT1;AGPAT2;PLPP2;PNPLA2
Macrophage Markers WP4146	2/9	22.22	0.250292	0.573748	2.3796	3.296	RAC2;CD68
Nod Like Receptor NLR Signaling WP288	2/9	22.22	0.250292	0.573748	2.3796	3.296	CD40;IKBKG
Drug Induction Of Bile Acid Pathway WP2289	3/17	17.65	0.27249	0.601715	1.7848	2.3205	ABCC3;ABCC2;SLC51B
Canonical And Non Canonical TGF B Signaling WP3874	3/17	17.65	0.27249	0.601715	1.7848	2.3205	BMP1;LOXL1;LOXL2
Iron Metabolism Disorders WP5172	3/17	17.65	0.27249	0.601715	1.7848	2.3205	HEPH;FTH1;FTL
IL3 Signaling WP286	7/49	14.29	0.269029	0.601715	1.3886	1.8231	JUN;CXCL8;SHC1;SRC;BAD;AKT1;MAPK3
Degradation Pathway Of Sphingolipids Including Diseases WP4153	3/17	17.65	0.27249	0.601715	1.7848	2.3205	ARSA;PSAP;GLA
TGF Beta In Thyroid Cells For Epithelial Mesenchymal Transition WP3859	3/17	17.65	0.27249	0.601715	1.7848	2.3205	ID1;AKT1;MAPK3
AGE RAGE Pathway WP2324	9/66	13.64	0.273733	0.602692	1.3156	1.7045	NFKBIA;JUN;MMP13;PRKCB;SHC1;SRC;AKT1;MMP9;MAPK3
DNA Damage Response Only ATM Dependent WP710	14/109	12.84	0.277887	0.610056	1.2282	1.5727	JUN;SHC1;BAD;AXIN1;NFKB2;BBC3;FOSL1;AKT2;DVL1;RAC2;AKT1;PMAIP1;RAC3;BAX
TGF Beta Receptor Signaling In Skeletal Dysplasias WP4816	8/58	13.79	0.280072	0.611867	1.3331	1.6966	JUN;EGF;SERPINE1;SPP1;LIF;LTBP3;MAPK3;SMAD7
B Cell Receptor Signaling WP23	12/92	13.04	0.280338	0.611867	1.25	1.5897	NFKBIA;JUN;MAP2K2;CD81;PRKCB;SHC1;RPS6KA1;RAC2;AKT1;IKBKG;PIP5K1C;MAPK4
T Cell Receptor Signaling WP69	10/75	13.33	0.281461	0.612543	1.2819	1.6252	NFKBIA;JUN;DBNL;MAP2K2;SHC1;AKT1;IKBKG;MAP3K14;LAT;MAPK3
Synaptic Signaling Associated With Autism Spectrum Disorder WP4539	7/50	14	0.286414	0.621526	1.3562	1.6957	RPTOR;BDNF;AKT2;EIF4EBP1;AKT1;TSC2;MAPK3
SARS CoV 2 And COVID 19 Pathway WP4846	2/10	20	0.292072	0.624802	2.082	2.5624	CTSL;FURIN
Non Homologous End Joining WP438	2/10	20	0.292072	0.624802	2.082	2.5624	POLM;POLL
Vitamin D Metabolism WP1531	2/10	20	0.292072	0.624802	2.082	2.5624	CYP27A1;RXRA
Trans Sulfuration Pathway WP2333	2/10	20	0.292072	0.624802	2.082	2.5624	MPST;GCLM
Mammary Gland Development Pathway Involution Stage 4 Of 4 WP2815	2/10	20	0.292072	0.624802	2.082	2.5624	BAX;MMP9
Thyroid Hormones And Peripheral Downstream Signaling Effects WP4746	12/93	12.9	0.293073	0.625167	1.2345	1.5151	RPTOR;CREB3;NOTCH1;RXRA;PAX8;SRC;BAD;AKT1S1;MLST8;TSC2;SIRT6;PNPLA2
MET In Type 1 Papillary Renal Cell Carcinoma WP4205	8/59	13.56	0.296252	0.628741	1.3069	1.5899	JUN;MAP2K2;SRC;BAD;AKT2;AKT1;PAK4;MAPK3
MYD88 Distinct Input Output Pathway WP3877	3/18	16.67	0.303098	0.628741	1.6657	1.9884	IL1A;JUN;IRAK1
JAK STAT Signaling In The Regulation Of Beta Cells WP5358	5/34	14.71	0.298204	0.628741	1.4362	1.7378	RPTOR;AKT2;AKT1S1;MLST8;AKT1
Mitochondrial Complex IV Assembly WP4922	5/34	14.71	0.298204	0.628741	1.4362	1.7378	COX8A;PNKD;PET100;COX17;COX5B
SARS CoV 2 Mt Chronic Ox Stress And Endothelial Dysfunction WP5183	4/26	15.38	0.302453	0.628741	1.5144	1.811	NLRX1;RPS6KA1;SIRT6;ECSIT
Wnt Beta Catenin Signaling In Leukemia WP3658	4/26	15.38	0.302453	0.628741	1.5144	1.811	JUP;LRP5;RARA;AKT1
MFAP5 Effect On Permeability And Motility Of Endothelial Cells WP4560	3/18	16.67	0.303098	0.628741	1.6657	1.9884	JUN;ACTN1;MAPK3
Exosome Biogenesis Inhib And Secretion Manumycin A CRPC Cells WP4301	3/18	16.67	0.303098	0.628741	1.6657	1.9884	RRAS;HGS;MAPK3
Genes Associated With The Development Of Rheumatoid Arthritis WP5033	3/18	16.67	0.303098	0.628741	1.6657	1.9884	CD40;STAT4;TRAF1
Prostaglandin And Leukotriene Metabolism In Senescence WP5321	5/34	14.71	0.298204	0.628741	1.4362	1.7378	MAPK11;TBXAS1;GGT1;PTGS1;PTGES
Fibrin Complement Receptor 3 Signaling WP4136	6/43	13.95	0.312056	0.643777	1.3508	1.5731	IRAK1;IRF3;SRC;LY96;AKT1;IKBKG
Vitamin A And Carotenoid Metabolism WP716	6/43	13.95	0.312056	0.643777	1.3508	1.5731	SULT1A1;CYP26A1;CYP26B1;RXRA;DGAT1;RARA
Metapathway Biotransformation Phase I And II WP702	22/183	12.02	0.31775	0.653731	1.1389	1.3057	GSTM4;GSTM3;GPX4;GSTP1;AKR1C1;EPHX1;GSR;AKR1C3;KCNAB2;COMT;CYP4F11;HS6ST1;CYP19A1;CYP27A1;SULT1A1;CYP26A1;CYP26B1;AKR1B10;CYP1A1;CHST1;NAT9;SULT1A2
Trans Sulfuration One Carbon Metabolism And Related Pathways WP2525	9/69	13.04	0.319279	0.655	1.2496	1.4267	GPX1;CHKB;GPX4;ETNK2;GSR;PEMT;GCLM;DNM1;BCAT2
Influence Of Laminopathies On Wnt Signaling WP4844	5/35	14.29	0.320106	0.655	1.3882	1.5813	CEBPB;LMNA;SPP1;AXIN1;TARBP2
Serotonin Receptor 4 6 7 And NR3C Signaling WP734	3/19	15.79	0.333841	0.661533	1.5615	1.7131	MAP2K2;SRF;MAPK3
IDO Metabolic Pathway WP5414	2/11	18.18	0.333518	0.661533	1.8506	2.032	KYNU;KYAT1
Intraflagellar Transport Proteins Binding To Dynein WP4532	4/27	14.81	0.327781	0.661533	1.4485	1.6157	DYNC2I2;IFT140;IFT27;DYNLRB1
Canonical And Non Canonical Notch Signaling WP3845	4/27	14.81	0.327781	0.661533	1.4485	1.6157	NOTCH1;JAG1;RRAS;DNER
Notch Signaling WP268	6/44	13.64	0.331734	0.661533	1.3152	1.4512	LFNG;NUMBL;NOTCH1;JAG1;DVL1;RFNG
Alternative Pathway Of Fetal Androgen Synthesis WP4524	2/11	18.18	0.333518	0.661533	1.8506	2.032	POR;HSD3B2
Gene Regulatory Network Modeling Somitogenesis WP2854	2/11	18.18	0.333518	0.661533	1.8506	2.032	LFNG;NOTCH1
Autosomal Recessive Osteopetrosis Pathways WP4788	2/11	18.18	0.333518	0.661533	1.8506	2.032	CLCN7;TCIRG1
Inclusion Body Myositis WP5120	2/11	18.18	0.333518	0.661533	1.8506	2.032	PSENEN;NFKB2
Glyoxylate Metabolism WP5166	2/11	18.18	0.333518	0.661533	1.8506	2.032	ALDH4A1;GRHPR
Nucleotide Excision Repair WP4753	6/44	13.64	0.331734	0.661533	1.3152	1.4512	POLD4;LIG1;POLD1;ERCC1;ERCC2;RAD23A
Androgen Receptor Signaling WP138	11/87	12.64	0.328743	0.661533	1.2058	1.3415	PIAS4;JUN;SRC;TGFB1I1;FHL2;AKT1;FLNA;STUB1;TLE5;RHOB;RAD9A
TGF Beta Signaling Pathway WP366	16/132	12.12	0.340894	0.673735	1.1493	1.2368	MAP2K3;JUN;MAP2K2;SHC1;SRC;TGFB1I1;AXIN1;SMAD7;MMP12;HGS;AKT1;TAB1;E2F4;JUNB;MAPK4;BCAR1
Orexin Receptor Pathway WP5094	11/88	12.5	0.342659	0.675451	1.1901	1.2746	CXCL8;MAP2K2;PRKCB;IL1B;GNA11;RPS6KA1;SLC2A1;EIF4EBP1;CXCL2;PLCD1;MAPK3
Nanoparticle Mediated Activation Of Receptor Signaling WP2643	4/28	14.29	0.353221	0.692644	1.3881	1.4445	MAPK11;MAP2K2;SRC;MAPK12
IL19 Signaling WP5422	4/28	14.29	0.353221	0.692644	1.3881	1.4445	CXCR4;AKT1;MAPK3;TNFRSF1A
Endochondral Ossification With Skeletal Dysplasias WP4808	8/63	12.7	0.362733	0.693136	1.2116	1.2286	ADAMTS4;MMP13;SPP1;AKT1;MMP9;FGFR3;PTHLH;VEGFA
TGF Beta Receptor Signaling WP560	7/54	12.96	0.358049	0.693136	1.2405	1.2741	JUN;EGF;SERPINE1;SPP1;LIF;MAPK3;SMAD7
Imatinib And Chronic Myeloid Leukemia WP3640	3/20	15	0.364518	0.693136	1.4696	1.4831	PDGFRB;BCR;PIM1
Serotonin Receptor 2 And ELK SRF GATA4 Signaling WP732	3/20	15	0.364518	0.693136	1.4696	1.4831	MAP2K2;SRF;MAPK3
Hereditary Leiomyomatosis And Renal Cell Carcinoma Pathway WP4206	3/20	15	0.364518	0.693136	1.4696	1.4831	SLC2A1;KEAP1;VEGFA
IL2 Signaling WP49	5/37	13.51	0.364359	0.693136	1.3013	1.3138	MAP2K2;SHC1;RPS6KB2;AKT1;MAPK3
Serotonin HTR1 Group And FOS Pathway WP722	5/37	13.51	0.364359	0.693136	1.3013	1.3138	MAP2K3;MAP2K2;SRF;GNAI2;MAPK3
Genetic Causes Of Porto Sinusoidal Vascular Disease WP5269	5/37	13.51	0.364359	0.693136	1.3013	1.3138	CYBC1;NOTCH1;EIF6;CYBA;MAPK3
Oxidation By Cytochrome P450 WP43	8/63	12.7	0.362733	0.693136	1.2116	1.2286	CYP27A1;CYB5R2;CYP26A1;CYP26B1;POR;CYP1A1;CYP4F11;CYP19A1
Endochondral Ossification WP474	8/63	12.7	0.362733	0.693136	1.2116	1.2286	ADAMTS4;MMP13;SPP1;AKT1;MMP9;FGFR3;PTHLH;VEGFA
BMP Signaling In Eyelid Development WP3927	3/20	15	0.364518	0.693136	1.4696	1.4831	JUN;NOTCH1;MAPK3
Ether Lipid Biosynthesis WP5275	3/20	15	0.364518	0.693136	1.4696	1.4831	PEX16;ARSA;LPIN3
RalA Downstream Regulated Genes WP2290	2/12	16.67	0.37422	0.702713	1.6654	1.637	RAC2;RAC3
Octadecanoid Formation From Linoleic Acid WP5324	2/12	16.67	0.37422	0.702713	1.6654	1.637	GPX4;PTGS1
Bile Acid Synthesis And Enterohepatic Circulation WP4389	2/12	16.67	0.37422	0.702713	1.6654	1.637	FGFR4;MAPK3
Nanoparticle Triggered Regulated Necrosis WP2513	2/12	16.67	0.37422	0.702713	1.6654	1.637	TNFRSF1A;FTL
Alanine And Aspartate Metabolism WP106	2/12	16.67	0.37422	0.702713	1.6654	1.637	PC;ASL
Hematopoietic SC Differentiation WP2849	7/55	12.73	0.376265	0.703046	1.2146	1.1872	IL1A;NOTCH1;CSF1;IL1B;PIM1;CXCR4;GATA2
Overlap Between Signal Transduction Pathways LMNA Laminopathies WP4879	7/55	12.73	0.376265	0.703046	1.2146	1.1872	CEBPB;NOTCH1;LMNA;AXIN1;SPP1;JUNB;TARBP2
Disorders Of Bile Acid Synthesis And Biliary Transport WP5176	4/29	13.79	0.378659	0.704025	1.3325	1.294	ABCC3;CYP27A1;ABCC2;SLC51B
RAS And Bradykinin Pathways In COVID 19 WP4969	4/29	13.79	0.378659	0.704025	1.3325	1.294	IL1A;F12;IL1B;SERPINE1
Glioblastoma Signaling WP2261	10/82	12.2	0.383725	0.711688	1.1568	1.1081	PDGFRB;MAP2K3;MAP2K2;PRKCB;SRC;AKT2;AKT1;TSC2;MAP2K7;MAPK3
mBDNF And proBDNF Regulation Of GABA Neurotransmission WP4829	5/38	13.16	0.386557	0.713425	1.2618	1.1993	NGFR;SHC1;BDNF;AP2A1;AP2A2
G13 Signaling WP524	5/38	13.16	0.386557	0.713425	1.2618	1.1993	RTKN;TNK2;LIMK1;ARHGEF1;PKN1
Wnt Signaling WP363	6/47	12.77	0.391404	0.720605	1.2188	1.1432	PRKCB;DVL1;LRP5;AXIN1;AKT1;TSC2
Nicotine Effect On Dopaminergic Neurons WP1602	3/21	14.29	0.394949	0.721836	1.3879	1.2893	CHRNA6;KCNK3;PPP1CA
Urea Cycle And Metabolism Of Amino Groups WP497	3/21	14.29	0.394949	0.721836	1.3879	1.2893	GAMT;ASL;NAGS
Metabolism Of Sphingolipids In ER And Golgi Apparatus WP4142	3/21	14.29	0.394949	0.721836	1.3879	1.2893	SPHK2;SPHK1;B4GALNT1
Pluripotent Stem Cell Differentiation Pathway WP2848	6/48	12.5	0.411327	0.724741	1.1897	1.0569	IL11;NOTCH1;CSF1;EGF;PDGFA;VEGFA
Myometrial Relaxation And Contraction Pathways WP289	18/156	11.54	0.40833	0.724741	1.0865	0.9731	JUN;RGS14;PRKCB;IGFBP2;ADCY7;RGS4;CNN2;CREB3;RGS3;PRKAR1B;GNB2;IL1B;GRK6;MAFF;IGFBP6;CAMK2G;RAMP1;PLCD1
Oligodendrocyte Differentiation Leading To Myelin For CNS WP4304	4/30	13.33	0.403991	0.724741	1.2811	1.1612	MAG;IL1B;LIF;CXCL2
CAMKK2 Pathway WP4874	13/110	11.82	0.399309	0.724741	1.1163	1.0248	FIS1;CRTC2;WFS1;SLC2A1;KEAP1;RPTOR;HMOX1;FAM20C;ULK1;NLRP1;SQSTM1;GIT1;MAPK3
PI3K Akt Signaling WP4172	38/338	11.24	0.404089	0.724741	1.0554	0.9563	CSF1;PKN3;PDGFA;RPTOR;AKT2;SPP1;EIF4EBP1;MLST8;AKT1;IKBKG;MAPK3;PDGFRB;NGFR;MAP2K2;VWF;LAMB3;BDNF;ITGA3;EGF;LAMB2;BAD;TSC2;VEGFA;CREB3;EFNA3;G6PC3;COL4A2;CDC37;GNB2;COL6A2;COL6A1;RPS6KB2;COL9A3;PKN1;ITGA5;FGFR4;FGFR3;EPHA2
4P16 3 Copy Number Variation WP5365	4/30	13.33	0.403991	0.724741	1.2811	1.1612	NELFB;NELFA;FGFR3;MAPK3
Estrogen Receptor Pathway WP2881	2/13	15.38	0.413862	0.724741	1.5139	1.3356	JUN;CYP1A1
Homologous Recombination WP186	2/13	15.38	0.413862	0.724741	1.5139	1.3356	POLD4;POLD1
Vitamin B12 Disorders WP4271	2/13	15.38	0.413862	0.724741	1.5139	1.3356	TCN2;CD320
Neuroinflammation WP4919	2/13	15.38	0.413862	0.724741	1.5139	1.3356	NFKBIA;JUN
Microtubule Cytoskeleton Regulation WP2038	6/48	12.5	0.411327	0.724741	1.1897	1.0569	SRC;MAP1B;DVL1;LIMK1;AKT1;F2RL2
Exercise Induced Circadian Regulation WP410	6/48	12.5	0.411327	0.724741	1.1897	1.0569	GSTM3;CEBPB;H2BC15;TUBB3;GSTP1;G0S2
Ganglio Sphingolipid Metabolism WP1423	2/13	15.38	0.413862	0.724741	1.5139	1.3356	B4GALNT1;ST6GALNAC6
Leukotriene Metabolic Pathway WP5171	2/13	15.38	0.413862	0.724741	1.5139	1.3356	PTGR1;GGT1
MFAP5 Mediated Ovarian Cancer Cell Motility And Invasiveness WP3301	2/13	15.38	0.413862	0.724741	1.5139	1.3356	JUN;MAPK3
DNA Repair Pathways Full Network WP4946	14/120	11.67	0.411629	0.724741	1.1001	0.9764	LIG1;CENPX;MPG;POLM;PNKP;RAD23A;POLD4;NTHL1;POLD1;ERCC1;ERCC2;POLL;FAAP100;MUTYH
Nitric Oxide Metabolism In Cystic Fibrosis WP4947	2/13	15.38	0.413862	0.724741	1.5139	1.3356	PRMT7;PRMT1
EDA Signaling In Hair Follicle Development WP3930	2/13	15.38	0.413862	0.724741	1.5139	1.3356	BMP1;RELB
Creatine Pathway WP5190	1/5	20	0.432947	0.734255	2.0815	1.7425	GAMT
Proline And Hydroxyproline Pathways WP5026	1/5	20	0.432947	0.734255	2.0815	1.7425	ALDH4A1
Immune Response To Tuberculosis WP4197	3/22	13.64	0.424977	0.734255	1.3148	1.1251	IRF1;IFI35;TYK2
Progeria Associated Lipodystrophy WP5103	3/22	13.64	0.424977	0.734255	1.3148	1.1251	POLD1;LMNA;LMNB2
Fatty Acid Biosynthesis WP357	3/22	13.64	0.424977	0.734255	1.3148	1.1251	PC;ECH1;ECHDC3
Prostaglandin And Leukotriene Metabolism In Senescence WP5122	4/31	12.9	0.429119	0.734255	1.2336	1.0437	MAPK11;TBXAS1;PTGS1;PTGES
ATM Signaling WP2516	5/40	12.5	0.430742	0.734255	1.1896	1.0019	NFKBIA;JUN;IKBKG;AP3B2;RAD9A
Gastric Cancer Network 2 WP2363	4/31	12.9	0.429119	0.734255	1.2336	1.0437	S100A6;COL9A3;CHTF18;LMNB2
Conversion Of Angiotensinogen To Angiotensin II WP4818	1/5	20	0.432947	0.734255	2.0815	1.7425	CTSD
Tyrosine Metabolism And Related Disorders WP4506	1/5	20	0.432947	0.734255	2.0815	1.7425	FAH
miR 517 Relationship With ARCN1 And USP1 WP3596	1/5	20	0.432947	0.734255	2.0815	1.7425	ID1
COVID 19 And Endothelial Cell Senescence WP5256	1/5	20	0.432947	0.734255	2.0815	1.7425	IL17RC
TCA Cycle Nutrient Use And Invasiveness Of Ovarian Cancer WP2868	1/5	20	0.432947	0.734255	2.0815	1.7425	MAPK3
Thyroid Stimulating Hormone TSH Signaling WP2032	7/58	12.07	0.430987	0.734255	1.143	0.962	MAP2K3;SRC;RPS6KA1;AKT1;RALGDS;GNAI2;MAPK3
Cancer Immunotherapy By PD 1 Blockade WP4585	3/23	13.04	0.454466	0.748825	1.2489	0.985	JUN;NFATC4;BATF
Mineralocorticoid Biosynthesis WP5279	2/14	14.29	0.452204	0.748825	1.3877	1.1013	AKR1C1;AKR1C3
Mod Of PI3K Akt mTOR Signaling By Bioactive Sphingolipids WP5192	2/14	14.29	0.452204	0.748825	1.3877	1.1013	SPHK2;AKT1
Female Steroid Hormones In Cardiomyocyte Energy Metabolism WP5318	2/14	14.29	0.452204	0.748825	1.3877	1.1013	ESRRA;AKT2
Codeine And Morphine Metabolism WP1604	2/14	14.29	0.452204	0.748825	1.3877	1.1013	ABCC3;ABCC2
Sulfatase And Aromatase Pathway WP5368	2/14	14.29	0.452204	0.748825	1.3877	1.1013	SLCO2B1;CYP19A1
Complement Activation WP545	3/23	13.04	0.454466	0.748825	1.2489	0.985	C1S;C1R;CD55
H19 Rb E2F1 And CDK Beta Catenin In Colorectal Cancer WP3969	2/14	14.29	0.452204	0.748825	1.3877	1.1013	JAG1;PMAIP1
Prion Disease Pathway WP3995	4/32	12.5	0.453957	0.748825	1.1895	0.9394	PRNP;RXRA;MAPK3;BATF
Estrogen Signaling WP712	3/23	13.04	0.454466	0.748825	1.2489	0.985	JUN;AKT1;IKBKG
Purine Metabolism And Related Disorders WP4224	3/23	13.04	0.454466	0.748825	1.2489	0.985	IMPDH1;ADA;APRT
DNA Mismatch Repair WP531	3/23	13.04	0.454466	0.748825	1.2489	0.985	POLD4;LIG1;POLD1
Roles Of Ceramides In Development Of Insulin Resistance WP5181	3/23	13.04	0.454466	0.748825	1.2489	0.985	AKT1;TRAF1;TNFRSF1A
Folate Metabolism WP176	8/69	11.59	0.464071	0.762982	1.092	0.8384	GPX1;CSF1;GPX4;IL1B;SERPINE1;MTHFS;SLC19A1;NFKB2
Leucine Isoleucine And Valine Metabolism WP4686	3/24	12.5	0.483301	0.769804	1.1894	0.8648	BCKDHA;ACSF3;BCAT2
Hippocampal Synaptogenesis And Neurogenesis WP5231	3/24	12.5	0.483301	0.769804	1.1894	0.8648	BDNF;RPS6KA1;CAMKK1
Cardiomyocyte Signaling Converging On Titin WP5344	4/33	12.12	0.478426	0.769804	1.1484	0.8467	MAP2K2;SRF;FHL2;MYPN
Fluoroacetic Acid Toxicity WP4966	1/6	16.67	0.493779	0.769804	1.6651	1.175	ACO2
Benzene Metabolism WP3891	1/6	16.67	0.493779	0.769804	1.6651	1.175	EPHX1
Hippo Signaling Regulation WP4540	11/98	11.22	0.484238	0.769804	1.0527	0.7634	PDGFRB;NGFR;PRKAR1B;PRKCB;GNA11;CDH24;FGFR4;FGFR3;EPHA2;TEAD3;GNAI2
Estrogen Metabolism WP5276	3/24	12.5	0.483301	0.769804	1.1894	0.8648	AKR1C3;COMT;CYP19A1
Urea Cycle And Associated Pathways WP4595	3/24	12.5	0.483301	0.769804	1.1894	0.8648	ALDH4A1;ASL;NAGS
exRNA Mechanism Of Action And Biogenesis WP2805	1/6	16.67	0.493779	0.769804	1.6651	1.175	DGCR8
Gamma Glutamyl Cycle For Glutathione Including Diseases WP4518	1/6	16.67	0.493779	0.769804	1.6651	1.175	GGT1
EV Release From Cardiac Cells And Their Functional Effects WP3297	1/6	16.67	0.493779	0.769804	1.6651	1.175	KLF2
Multiple Epiphyseal Dysplasia And Pseudoachondroplasia Genes WP4789	1/6	16.67	0.493779	0.769804	1.6651	1.175	COL9A3
GLP 1 From Intestine And Pancreas Role In Glucose Homeostasis WP5452	1/6	16.67	0.493779	0.769804	1.6651	1.175	SLC2A1
Amino Acid Metabolism Pathway Excerpt His Catabolism Extension WP4661	1/6	16.67	0.493779	0.769804	1.6651	1.175	GPT2
Somatroph Axis GH Relationship To Dietary Restriction And Aging WP4186	1/6	16.67	0.493779	0.769804	1.6651	1.175	AKT1
Familial Hyperlipidemia Type 5 WP5112	2/15	13.33	0.489067	0.769804	1.2809	0.9162	PLTP;LMF1
Mammary Gland Development Pathway Embryonic Development Stg 1/4 WP2813	2/15	13.33	0.489067	0.769804	1.2809	0.9162	CLDN4;AKT1
PGK1 PKM2 KHKC KHKA Acting As Protein Kinases WP5433	2/15	13.33	0.489067	0.769804	1.2809	0.9162	PKM;AKT1S1
Omega 3 Omega 6 Fatty Acid Synthesis WP4723	2/15	13.33	0.489067	0.769804	1.2809	0.9162	ACOX3;PLA2G6
Modulators Of TCR Signaling And T Cell Activation WP5072	7/61	11.48	0.485031	0.769804	1.0793	0.7809	NFKBIA;TMEM222;AKT1;ELOB;IKBKG;MAP3K14;LAT
COVID 19 Adverse Outcome Pathway WP4891	2/15	13.33	0.489067	0.769804	1.2809	0.9162	CXCL8;IL1B
Oxysterols Derived From Cholesterol WP4545	6/51	11.76	0.470507	0.769804	1.1102	0.837	CYP27A1;ACOT8;ACOT7;NR1H2;ACOT11;ACOT13
DNA Replication WP466	5/42	11.9	0.474225	0.769804	1.1252	0.8395	POLD4;CDT1;POLD1;MCM5;MCM2
Nuclear Receptors In Lipid Metabolism And Toxicity WP299	4/33	12.12	0.478426	0.769804	1.1484	0.8467	ABCC3;CYP26A1;ABCC2;RARA
Splicing Factor NOVA Regulated Synaptic Proteins WP4148	5/42	11.9	0.474225	0.769804	1.1252	0.8395	CADM3;NCDN;AGRN;CAMK2G;MAPK4
Fas Ligand Pathway And Stress Induction Of Heat Shock Proteins WP314	5/43	11.63	0.495562	0.770989	1.0955	0.7691	IL1A;JUN;LMNA;HSPB1;LMNB2
Type 2 Papillary Renal Cell Carcinoma WP4241	4/34	11.76	0.502455	0.775305	1.1101	0.764	SLC2A1;ELOB;BIRC7;VEGFA
Hepatocyte Growth Factor Receptor Signaling WP313	4/34	11.76	0.502455	0.775305	1.1101	0.764	JUN;MAP2K2;SRC;MAPK3
Purinergic Signaling WP4900	4/34	11.76	0.502455	0.775305	1.1101	0.764	GNAZ;P2RX6;GNA11;GNAI2
Alstrom Syndrome WP5202	4/34	11.76	0.502455	0.775305	1.1101	0.764	BLOC1S1;IFT27;E2F4;ACTN4
Androgen Receptor Network In Prostate Cancer WP2263	12/109	11.01	0.507341	0.781242	1.0299	0.6989	RPTOR;JUN;MAP2K2;SMARCD3;HSD3B2;BAD;EIF4EBP1;AKT1;TSC2;BAX;NDRG1;MAPK3
Thyroxine Thyroid Hormone Production WP1981	3/25	12	0.511384	0.785862	1.1353	0.7614	MAP2K2;SLC26A6;MAPK3
Axon Guidance WP5289	8/72	11.11	0.513684	0.786187	1.0407	0.6932	ROBO3;RRAS;SRC;FES;ILK;CXCR4;L1CAM;EPHA2
Cholesterol Metabolism WP5304	8/72	11.11	0.513684	0.786187	1.0407	0.6932	CYP27A1;LRPAP1;DGAT1;OSBPL5;TSPO;MVD;PLTP;SLC27A4
Osteoclast Signaling WP12	2/16	12.5	0.524327	0.79122	1.1893	0.7679	SPP1;ACP5
Deregulation Of Rab And Rab Effector Genes In Bladder Cancer WP2291	2/16	12.5	0.524327	0.79122	1.1893	0.7679	UNC13D;TBC1D10A
Cysteine And Methionine Catabolism WP4504	2/16	12.5	0.524327	0.79122	1.1893	0.7679	MPST;SQOR
Major Receptors Targeted By Epinephrine And Norepinephrine WP4589	2/16	12.5	0.524327	0.79122	1.1893	0.7679	ADRA2C;ADCY7
Tryptophan Catabolism Leading To NAD Production WP4210	2/16	12.5	0.524327	0.79122	1.1893	0.7679	KYNU;NADSYN1
Pathways Of Nucleic Acid Metabolism And Innate Immune Sensing WP4705	2/16	12.5	0.524327	0.79122	1.1893	0.7679	RNASEH2A;IRF3
Hedgehog Signaling WP47	2/16	12.5	0.524327	0.79122	1.1893	0.7679	GRK2;KIF7
Notch Signaling WP61	6/54	11.11	0.52791	0.794052	1.0406	0.6648	PSENEN;NUMBL;NOTCH1;JAG1;SRC;AKT1
Hippo Merlin Signaling Dysregulation WP4541	13/120	10.83	0.528313	0.794052	1.0114	0.6453	PDGFRB;NGFR;ITGA3;PPP1CA;PRKAR1B;ITGAX;CDH24;ITGA5;FGFR4;FGFR3;EPHA2;TEAD3;PAK4
MAP3K1 Role In Promoting And Blocking Gonadal Determination WP4872	2/17	11.76	0.557906	0.803256	1.11	0.6477	MAPK11;AXIN1
Glycosaminoglycan Degradation WP4815	2/17	11.76	0.557906	0.803256	1.11	0.6477	HYAL2;SGSH
IL9 Signaling WP22	2/17	11.76	0.557906	0.803256	1.11	0.6477	MAP2K2;MAPK3
Cells And Molecules Involved In Acute Inflammatory Response WP4493	2/17	11.76	0.557906	0.803256	1.11	0.6477	IL1A;CXCL8
Platelet Mediated Interactions W Vascular And Circulating Cells WP4462	2/17	11.76	0.557906	0.803256	1.11	0.6477	CD40;IL1B
Endoplasmic Reticulum Stress Response In Coronavirus Infection WP4861	5/46	10.87	0.557403	0.803256	1.0152	0.5933	PPP1R15A;PPP1R14B;PPP1R16A;PPP1R12C;PPP1CA
Mevalonate Pathway WP3963	1/7	14.29	0.548087	0.803256	1.3875	0.8343	MVD
Aflatoxin B1 Metabolism WP699	1/7	14.29	0.548087	0.803256	1.3875	0.8343	EPHX1
Acetylcholine Synthesis WP528	1/7	14.29	0.548087	0.803256	1.3875	0.8343	PEMT
Cell Interactions Of The Pancreatic Cancer Microenvironment WP5284	3/26	11.54	0.538636	0.803256	1.0859	0.6718	CSF1;CXCR4;VEGFA
Sphingolipid Metabolism Integrated Pathway WP4726	3/26	11.54	0.538636	0.803256	1.0859	0.6718	SPHK2;SPHK1;PLPP2
GLP 1 In Pancreatic Islet Cells WP5447	1/7	14.29	0.548087	0.803256	1.3875	0.8343	SLC2A1
Kinin Kallikrein Pathway WP5089	1/7	14.29	0.548087	0.803256	1.3875	0.8343	F12
COVID 19 Structural Coverage Map WP5145	3/26	11.54	0.538636	0.803256	1.0859	0.6718	UPF1;IGHMBP2;TAB1
miR 509 3P Alteration Of YAP1 ECM Axis WP3967	2/17	11.76	0.557906	0.803256	1.11	0.6477	BCAR1;TEAD3
DDX1 As A Regulatory Component Of The Drosha Microprocessor WP2942	1/7	14.29	0.548087	0.803256	1.3875	0.8343	DGCR8
miRNA Targeting Cancer Growth And Vascularization Glioblastoma WP3593	1/7	14.29	0.548087	0.803256	1.3875	0.8343	VEGFA
Aryl Hydrocarbon Receptor Pathway WP2586	5/46	10.87	0.557403	0.803256	1.0152	0.5933	SRC;CDC37;AIP;CYP1A1;VEGFA
NO cGMP PKG Mediated Neuroprotection WP4008	5/46	10.87	0.557403	0.803256	1.0152	0.5933	NFKBIA;BAD;IL1B;TSPO;CAMK2G
T Cell Modulation In Pancreatic Cancer WP5078	5/46	10.87	0.557403	0.803256	1.0152	0.5933	CD40;LGALS1;TNFSF9;VSIR;VEGFA
Envelope Proteins And Potential Roles In EDMD Physiopathology WP4535	5/46	10.87	0.557403	0.803256	1.0152	0.5933	MAP2K2;SRF;ADCY7;MAPK3;PLEC
DNA IR Double Strand Breaks And Cellular Response Via ATM WP3959	6/55	10.91	0.546479	0.803256	1.0193	0.6159	UPF1;RASSF1;TRIM28;HSF1;BAX;RAD9A
Photodynamic Therapy Induced Unfolded Protein Response WP3613	3/27	11.11	0.564993	0.810361	1.0406	0.5941	PPP1R15A;TRIB3;BBC3
Sphingolipid Metabolism Overview WP4725	3/27	11.11	0.564993	0.810361	1.0406	0.5941	SPHK2;SPHK1;PLPP2
Genes Related To Primary Cilium Development Based On CRISPR WP4536	11/104	10.58	0.566472	0.810938	0.9845	0.5595	DYNC2I2;TEDC1;TEDC2;IFT140;FBF1;CDK20;IQCE;IFT27;KATNB1;B9D1;CPLANE2
Physico Chemical Features And Toxicity Associated Pathways WP3680	7/66	10.61	0.571248	0.816223	0.9876	0.553	JUN;GPX1;SHC1;SRC;DVL1;AXIN1;AKT1
Complement System WP2806	10/95	10.53	0.574128	0.818785	0.9792	0.5434	PRNP;CD40;RPS19;C1S;F12;PLAUR;SPP1;TXN;CD55;GNAI2
TCA Cycle Aka Krebs Or Citric Acid Cycle WP78	2/18	11.11	0.589757	0.82124	1.0405	0.5495	IDH3G;ACO2
Ketogenesis And Ketolysis WP4742	1/8	12.5	0.596572	0.82124	1.1892	0.6143	SLC2A1
ROS In COVID 19 Endothelial Dysfunction WP5258	1/8	12.5	0.596572	0.82124	1.1892	0.6143	TNFRSF1A
Cerebral Organic Acidurias Including Diseases WP4519	1/8	12.5	0.596572	0.82124	1.1892	0.6143	D2HGDH
Caloric Restriction And Aging WP4191	1/8	12.5	0.596572	0.82124	1.1892	0.6143	AKT1
Cytosine Methylation WP3585	1/8	12.5	0.596572	0.82124	1.1892	0.6143	MBD3
mRNA Processing WP411	13/125	10.4	0.589786	0.82124	0.966	0.51	SF3B5;SF3A2;CPSF1;PRMT1;PTBP1;LSM7;PRPF6;SNRPD2;U2AF2;CD2BP2;CLASRP;PSKH1;SNRPB
Nephrogenesis WP5052	2/18	11.11	0.589757	0.82124	1.0405	0.5495	JAG1;FOXD1
Rett Syndrome WP4312	5/48	10.42	0.596449	0.82124	0.9678	0.5001	HDAC5;SRRM3;XAB2;GPS2;SCN2A
Parkinson 39 S Disease Pathway WP2371	4/38	10.53	0.593073	0.82124	0.9793	0.5116	MAPK11;UCHL1;PINK1;MAPK12
Sphingolipid Metabolism In Senescence WP5121	3/28	10.71	0.590405	0.82124	0.9989	0.5264	PRKCB;SPHK1;S1PR2
Angiotensin II Receptor Type 1 Pathway WP5036	3/28	10.71	0.590405	0.82124	0.9989	0.5264	IL11;RRAS;F12
Striated Muscle Contraction Pathway WP383	4/38	10.53	0.593073	0.82124	0.9793	0.5116	MYBPC1;TNNT1;TPM2;ACTN4
Complement System In Neuronal Development And Plasticity WP5090	11/106	10.38	0.592707	0.82124	0.9636	0.504	C1S;C1R;AXL;ITGAX;BAX;GAS6;MFGE8;CLU;CX3CL1;CD55;LLGL2
Insulin Signaling In Adipocytes Normal Condition WP3634	1/8	12.5	0.596572	0.82124	1.1892	0.6143	AKT2
Insulin Signaling In Adipocytes Diabetic Condition WP3635	1/8	12.5	0.596572	0.82124	1.1892	0.6143	AKT2
Cholesterol Synthesis Disorders WP5193	2/18	11.11	0.589757	0.82124	1.0405	0.5495	HSD3B2;MVD
Familial Hyperlipidemia Type 1 WP5108	2/18	11.11	0.589757	0.82124	1.0405	0.5495	PLTP;LMF1
Hijack Of Ubiquitination By SARS CoV 2 WP4860	1/8	12.5	0.596572	0.82124	1.1892	0.6143	ELOB
PPAR Signaling WP3942	7/68	10.29	0.603789	0.828147	0.9551	0.4819	CYP27A1;RXRA;ILK;ACOX3;CPT1C;PLTP;SLC27A4
Melanoma WP4685	7/68	10.29	0.603789	0.828147	0.9551	0.4819	MAP2K2;GADD45B;BAD;AKT2;AKT1;BAX;MAPK3
Measles Virus Infection WP4630	14/136	10.29	0.605843	0.829454	0.9549	0.4785	JUN;BAD;TYK2;NFKB2;BBC3;NFKBIA;IL1A;IRAK1;IRF3;IL1B;BAX;IKBKG;IKBKE;NFKBIB
Kleefstra Syndrome WP5351	3/29	10.34	0.614838	0.834987	0.9604	0.4671	SMARCD3;RXRA;BAP1
One Carbon Metabolism WP241	3/29	10.34	0.614838	0.834987	0.9604	0.4671	TCN2;GLRX;MTHFS
Ovarian Infertility WP34	4/39	10.26	0.614144	0.834987	0.9512	0.4637	CEBPB;AKT1;TSC2;CYP19A1
Extracellular Vesicle Mediated Signaling In Recipient Cells WP2870	3/29	10.34	0.614838	0.834987	0.9604	0.4671	AXIN1;AKT1;MFGE8
Mitochondrial Gene Expression WP391	2/19	10.53	0.619864	0.834987	0.9793	0.4683	ESRRA;POLRMT
KCNQ2 Related Epilepsies WP5360	2/19	10.53	0.619864	0.834987	0.9793	0.4683	KCNQ3;STX1A
Disorders Of Folate Metabolism And Transport WP4259	2/19	10.53	0.619864	0.834987	0.9793	0.4683	MTHFS;SLC19A1
Farnesoid X Receptor Pathway WP2879	2/19	10.53	0.619864	0.834987	0.9793	0.4683	RXRA;SLCO2B1
Th17 Cell Differentiation Pathway WP5130	7/69	10.14	0.619563	0.834987	0.9396	0.4498	NFKBIA;JUN;RXRA;IL1B;RARA;TYK2;LAT
GPR143 In Melanocytes And Retinal Pigment Epithelium Cells WP4941	3/30	10	0.638265	0.839393	0.9248	0.4152	MC1R;PRKCB;VEGFA
Inflammatory Response Pathway WP453	3/30	10	0.638265	0.839393	0.9248	0.4152	CD40;LAMB2;TNFRSF1A
Glycerophospholipid Biosynthetic Pathway WP2533	3/30	10	0.638265	0.839393	0.9248	0.4152	CHKB;PEMT;GPAT3
Sphingolipid Pathway WP1422	3/30	10	0.638265	0.839393	0.9248	0.4152	SPHK2;SPHK1;PPP1CA
Folate Alcohol And Cancer Pathway Hypotheses WP1589	1/9	11.11	0.639856	0.839393	1.0405	0.4646	CEBPB
Microglia Pathogen Phagocytosis Pathway WP3937	4/40	10	0.634522	0.839393	0.9247	0.4207	RAC2;RAC3;CYBA;LAT
Methylation Pathways WP704	1/9	11.11	0.639856	0.839393	1.0405	0.4646	COMT
Mitochondrial Beta Oxidation WP5241	1/9	11.11	0.639856	0.839393	1.0405	0.4646	ECI1
Biotin Metabolism Including IMDs WP5031	1/9	11.11	0.639856	0.839393	1.0405	0.4646	PC
Clock Controlled Autophagy In Bone Metabolism WP5205	8/80	10	0.636609	0.839393	0.9246	0.4176	EFNB2;NOTCH1;CSF1;ATG101;LRP5;AKT1;ULK1;SQSTM1
15Q11 2 Copy Number Variation Syndrome WP4940	1/9	11.11	0.639856	0.839393	1.0405	0.4646	TUBGCP6
Amino Acid Transport Defects IEMs WP5029	1/9	11.11	0.639856	0.839393	1.0405	0.4646	SLC3A2
Overview Of Proinflammatory And Profibrotic Mediators WP5095	13/129	10.08	0.63633	0.839393	0.9325	0.4215	IL11;CXCL8;CSF1;CCL20;LIF;CXCL2;MMP9;CX3CL1;VEGFA;IL1A;IL1B;SPP1;CCL26
Vitamin D Receptor Pathway WP2877	19/186	10.22	0.624489	0.839393	0.9466	0.4457	G6PD;CD40;S100A2;SEMA3B;LRP5;G0S2;PTHLH;CDC34;RXRA;NINJ1;ID1;DNER;S100A6;CYP1A1;SPP1;LRRC8A;JUNB;ABCD1;EPHB4
Ectoderm Differentiation WP2858	14/138	10.14	0.628199	0.839393	0.9394	0.4367	H2BC9;GRAMD1B;JUP;FHL2;STC1;TSKU;TLE5;TRPM2;SGSM3;ZNF219;PIM1;KIFC3;GAS2L1;ZBTB7B
Lung Pathology Of COVID 19 WP5146	2/20	10	0.648236	0.844501	0.9248	0.4009	IRF3;IL1B
Cell Differentiation Expanded Index WP2023	2/20	10	0.648236	0.844501	0.9248	0.4009	HDAC5;SRF
Autophagy In Pancreatic Ductal Adenocarcinoma WP5331	2/20	10	0.648236	0.844501	0.9248	0.4009	PINK1;SQSTM1
Pyrimidine Metabolism And Related Diseases WP4225	2/20	10	0.648236	0.844501	0.9248	0.4009	NT5C;TYMP
G Protein Signaling WP35	9/91	9.89	0.651824	0.846247	0.9132	0.3909	GNAZ;PRKAR1B;RRAS;PRKCB;GNA11;GNB2;ARHGEF1;ADCY7;GNAI2
Synaptic Vesicle Pathway WP2267	5/51	9.8	0.6512	0.846247	0.9046	0.388	NAPA;AP2A1;AP2A2;DNM1;STX1A
Common Pathways Underlying Drug Addiction WP2636	4/41	9.76	0.654189	0.846399	0.8997	0.3818	MAP2K2;PRKCB;MAPK3;PPP1CA
Neural Crest Differentiation WP2064	10/101	9.9	0.653247	0.846399	0.9143	0.3893	HDAC5;NOTCH1;HDAC11;DVL1;ID1;AXIN1;FGFR3;NFKB2;RHOB;HDAC7
SARS Coronavirus And Innate Immunity WP4912	3/31	9.68	0.660673	0.850405	0.8917	0.3696	IRF3;TYK2;IKBKE
Ethanol Effects On Histone Modifications WP3996	3/31	9.68	0.660673	0.850405	0.8917	0.3696	HDAC5;SLC19A1;HDAC7
Type I Interferon Induction And Signaling SARS CoV 2 Infection WP4868	3/31	9.68	0.660673	0.850405	0.8917	0.3696	IRF3;TYK2;IKBKE
TAR Syndrome WP5362	6/62	9.68	0.665861	0.85562	0.8916	0.3626	BRF1;CXCR4;FURIN;RBCK1;TXN;DNM1
mRNA Vaccine Activation Of Dendritic Cell And Induction IFN1 WP5187	1/10	10	0.678499	0.861568	0.9249	0.3587	IRF3
Liver X Receptor Pathway WP2874	1/10	10	0.678499	0.861568	0.9249	0.3587	RXRA
Steroid Biosynthesis WP496	1/10	10	0.678499	0.861568	0.9249	0.3587	HSD3B2
Type III Interferon Signaling WP2113	1/10	10	0.678499	0.861568	0.9249	0.3587	TYK2
Neurotransmitter Disorders WP4220	1/10	10	0.678499	0.861568	0.9249	0.3587	COMT
Tamoxifen Metabolism WP691	2/21	9.52	0.674898	0.861568	0.8761	0.3445	SULT1A1;CYP1A1
FOXA2 Pathway WP5066	2/21	9.52	0.674898	0.861568	0.8761	0.3445	ABCC3;ABCC2
Regucalcin In Proximal Tubule Epithelial Kidney Cells WP4838	3/32	9.38	0.682058	0.864629	0.8609	0.3294	AKT1;BAX;TNFRSF1A
Vasopressin Regulated Water Reabsorption WP5085	4/44	9.09	0.708823	0.870361	0.8321	0.2864	CREB3;ARHGDIA;AQP3;RAB11B
PKC Gamma Calcium Signaling In Ataxia WP4760	2/22	9.09	0.69989	0.870361	0.8322	0.297	GNA11;HOMER3
Disruption Of Postsynaptic Signaling By CNV WP4875	3/33	9.09	0.702421	0.870361	0.8322	0.2939	CAMK2G;STX1A;MAPK3
PTF1A Related Regulatory Pathway WP4147	1/11	9.09	0.712997	0.870361	0.8323	0.2816	NOTCH1
ATR Signaling WP3875	1/11	9.09	0.712997	0.870361	0.8323	0.2816	RAD9A
Arrhythmogenic Right Ventricular Cardiomyopathy WP2118	7/74	9.46	0.692944	0.870361	0.8692	0.3188	JUP;ITGA3;ACTN1;LMNA;CACNA2D4;ACTN4;ITGA5
Breast Cancer Pathway WP4262	15/154	9.74	0.692205	0.870361	0.8976	0.3302	JUN;MAP2K2;NOTCH1;GADD45B;SHC1;EGF;AXIN1;LRP5;NFKB2;AKT2;DVL1;RPS6KB2;AKT1;BAX;MAPK3
Integrated Cancer Pathway WP1971	4/44	9.09	0.708823	0.870361	0.8321	0.2864	BAD;AKT1;BAX;BBC3
8P23 1 Copy Number Variation Syndrome WP5346	5/54	9.26	0.700982	0.870361	0.849	0.3016	BMP1;MCRS1;AXIN1;CTSD;MAPK3
Transcription Factor Regulation In Adipogenesis WP3599	2/22	9.09	0.69989	0.870361	0.8322	0.297	CEBPB;RXRA
PAFAH1B1 Copy Number Variation WP5409	1/11	9.09	0.712997	0.870361	0.8323	0.2816	PAFAH1B3
Induction Of Autophagy And TLR Signaling By Graphene Oxide WP5336	1/11	9.09	0.712997	0.870361	0.8323	0.2816	IRF3
Pathways Affected In Adenoid Cystic Carcinoma WP3651	6/65	9.23	0.710447	0.870361	0.8461	0.2892	H1-4;MAP2K2;NOTCH1;AKT1;FGFR4;H2AC16
Type I Collagen Synthesis Osteogenesis Imperfecta WP4786	3/33	9.09	0.702421	0.870361	0.8322	0.2939	BMP1;LRP5;PLOD1
Mammary Gland Development Pregnancy And Lactation Stage 3 Of 4 WP2817	3/33	9.09	0.702421	0.870361	0.8322	0.2939	CEBPB;ORAI1;USF2
Cytokine Cytokine Receptor Interaction WP5473	25/255	9.8	0.713164	0.870361	0.9037	0.3055	ACVRL1;CD40;CXCL8;CSF1;CXCR4;CXCL2;CX3CL1;TNFRSF8;IL13RA2;RELT;NGFR;IL11;TNFRSF12A;IL1R1;CCL20;GDF15;CD70;LIF;IL17RC;TNFRSF1A;IL1A;CLCF1;TNFSF9;LTBR;CCL26
Male Infertility WP4673	14/145	9.66	0.701122	0.870361	0.8889	0.3156	GPX1;XRCC3;HMGA1;CXXC1;LRWD1;CLU;MMP9;CYP26B1;TCN2;ERCC1;ERCC2;CYP1A1;PEMT;H4C1
Iron Metabolism In Placenta WP2007	1/11	9.09	0.712997	0.870361	0.8323	0.2816	MCOLN1
UDP Derived Sugars Synthesis In Fibroblasts WP5394	1/11	9.09	0.712997	0.870361	0.8323	0.2816	GALE
Familial Hyperlipidemia Type 4 WP5111	2/22	9.09	0.69989	0.870361	0.8322	0.297	PLTP;LMF1
Pathophysiological Roles Of DUX4 In FSHD1 WP5342	2/22	9.09	0.69989	0.870361	0.8322	0.297	UPF1;VEGFA
Tryptophan Metabolism WP465	3/33	9.09	0.702421	0.870361	0.8322	0.2939	KYNU;CYP1A1;KYAT1
Heart Development WP1591	4/44	9.09	0.708823	0.870361	0.8321	0.2864	NOTCH1;SRF;VEGFA;NFATC4
Sudden Infant Death Syndrome SIDS Susceptibility Pathways WP706	15/157	9.55	0.720303	0.876233	0.8784	0.2882	JUN;CEBPB;CXCL8;BDNF;MAZ;GATA2;NFKB2;VEGFA;IL1A;PRKAR1B;IL1B;TAC1;ALDOA;GAPDH;SNTA1
Joubert Syndrome WP4656	7/76	9.21	0.71957	0.876233	0.844	0.2777	DVL1;ARL2;FLNA;UNC119;NPHP4;B9D1;B9D2
Leukocyte Intrinsic Hippo Pathway Functions WP4542	3/34	8.82	0.721773	0.876604	0.8053	0.2626	NDRG1;TEAD3;FERMT3
Nanoparticle Triggered Autophagic Cell Death WP2509	2/23	8.7	0.723264	0.877001	0.7926	0.2568	TSC2;ULK1
SRF And miRs In Smooth Muscle Differentiation And Proliferation WP1991	1/12	8.33	0.743795	0.893382	0.7566	0.224	SRF
Resolvin E1 And Resolvin D1 Signaling Decrease Inflammation WP5191	1/12	8.33	0.743795	0.893382	0.7566	0.224	AKT1
Kallmann Syndrome WP5074	2/24	8.33	0.745078	0.893382	0.7565	0.2226	MAP2K2;AKT1
MTHFR Deficiency WP4288	2/24	8.33	0.745078	0.893382	0.7565	0.2226	PEMT;COMT
Irinotecan Pathway WP229	1/12	8.33	0.743795	0.893382	0.7566	0.224	ABCC2
TGFB Smad Signaling WP5382	1/12	8.33	0.743795	0.893382	0.7566	0.224	SERPINE1
P38 MAPK Signaling WP400	3/35	8.57	0.740128	0.893382	0.7801	0.2347	SHC1;HSPB1;TRAF2
ncRNAs Involved In STAT3 Signaling In Hepatocellular Carcinoma WP4337	1/13	7.69	0.771289	0.903522	0.6935	0.1801	IL11
Melatonin Metabolism And Effects WP3298	3/37	8.11	0.773934	0.903522	0.7341	0.1881	SULT1A1;IRAK1;CYP1A1
Development Of Pulmonary Dendritic Cells And Macrophage Subsets WP3892	1/13	7.69	0.771289	0.903522	0.6935	0.1801	CSF1
Enterocyte Cholesterol Metabolism WP5333	3/36	8.33	0.757507	0.903522	0.7564	0.2101	DGAT1;MVD;SLC27A4
Zinc Homeostasis WP3529	3/36	8.33	0.757507	0.903522	0.7564	0.2101	MT2A;SLC39A13;SLC39A3
Ganglio Series Sphingolipid Metabolism WP5299	1/13	7.69	0.771289	0.903522	0.6935	0.1801	B4GALNT1
Dopamine Metabolism WP2436	1/13	7.69	0.771289	0.903522	0.6935	0.1801	COMT
Mevalonate Arm Of Cholesterol Biosynthesis Pathway WP4190	1/13	7.69	0.771289	0.903522	0.6935	0.1801	MVD
Markers Of Kidney Cell Lineage WP5236	5/59	8.47	0.772498	0.903522	0.7702	0.1988	PDGFRB;FOXD1;NOTCH1;JAG1;RARA
Energy Metabolism WP1541	4/48	8.33	0.771462	0.903522	0.7563	0.1962	ESRRA;RXRA;PRMT1;CAMK2G
Amino Acid Metabolism WP3925	8/91	8.79	0.773048	0.903522	0.8016	0.2063	MPST;PKM;PC;GPT2;GSR;ACO2;FAH;GCLM
Genes Targeted By miRNAs In Adipocytes WP1992	1/13	7.69	0.771289	0.903522	0.6935	0.1801	SRF
Familial Hyperlipidemia Type 3 WP5110	1/13	7.69	0.771289	0.903522	0.6935	0.1801	PLTP
Mechanoreg And Pathology Of YAP TAZ Hippo And Non Hippo Mechs WP4534	4/47	8.51	0.756877	0.903522	0.7739	0.2156	MAP4K2;SRC;PAK4;TEAD3
DNA Damage Response WP707	6/69	8.7	0.763279	0.903522	0.7922	0.214	GADD45B;AKT1;PMAIP1;BAX;BBC3;RAD9A
Vitamin K Metabolism And Activation Of Dependent Proteins WP5186	1/13	7.69	0.771289	0.903522	0.6935	0.1801	AIFM2
Pre Implantation Embryo WP3527	5/58	8.62	0.759335	0.903522	0.7848	0.2161	ESRRA;FOXD1;HMGA1;GATA2;AQP3
Phosphoinositides Metabolism WP4971	4/49	8.16	0.785349	0.914015	0.7394	0.1787	PIP5K1C;SBF1;PLCD3;PLCD1
PPAR Alpha Pathway WP2878	2/26	7.69	0.784297	0.914015	0.6934	0.1685	RXRA;PLTP
Type II Interferon Signaling WP619	3/38	7.89	0.789436	0.917354	0.7131	0.1686	IRF1;IL1B;GBP1
Osteoblast Signaling WP322	1/14	7.14	0.795834	0.917708	0.6401	0.1462	PDGFRB
Riboflavin And CoQ Disorders WP5037	1/14	7.14	0.795834	0.917708	0.6401	0.1462	SLC52A2
Serotonin And Anxiety Related Events WP3944	1/14	7.14	0.795834	0.917708	0.6401	0.1462	PRKCB
6Q16 Copy Number Variation WP5400	1/14	7.14	0.795834	0.917708	0.6401	0.1462	BDNF
Regulation Sister Chromatid Sep At Meta-Anaphase Transition WP4240	1/14	7.14	0.795834	0.917708	0.6401	0.1462	MAD1L1
Translation Factors WP107	4/50	8	0.798555	0.919437	0.7233	0.1627	CLUH;EIF6;EIF4EBP1;EIF3G
Gastric Cancer Network 1 WP2361	2/27	7.41	0.801841	0.921811	0.6656	0.147	NOTCH1;MYBL2
GPCRs Class C Metabotropic Glutamate Pheromone WP501	1/15	6.67	0.817746	0.925794	0.5944	0.1196	GPRC5A
Biosynth Of Tetrahydrobiopterin And Phenylalanine Catabolism WP4156	1/15	6.67	0.817746	0.925794	0.5944	0.1196	COMT
Biogenic Amine Synthesis WP550	1/15	6.67	0.817746	0.925794	0.5944	0.1196	COMT
Eicosanoid Metabolism Via Lipooxygenases LOX WP4721	2/28	7.14	0.818105	0.925794	0.64	0.1285	ACOX3;PTGR1
Glycogen Synthesis And Degradation WP500	3/40	7.5	0.817788	0.925794	0.6745	0.1357	PTPA;PYGB;GBE1
Affected Pathways In Duchenne Muscular Dystrophy WP5356	6/74	8.11	0.81883	0.925794	0.7337	0.1467	NFKBIA;IL1A;SERPINE1;SPP1;ORAI1;MMP9
OSX And miRNAs In Tooth Development WP3971	1/15	6.67	0.817746	0.925794	0.5944	0.1196	NOTCH1
Rubinstein Taybi Syndrome 1 WP5367	1/15	6.67	0.817746	0.925794	0.5944	0.1196	MAFG
Extrafollicular And Follicular B Cell Activation By SARS CoV 2 WP5218	6/74	8.11	0.81883	0.925794	0.7337	0.1467	BCR;CD40;CD82;ITGAX;CXCR4;MFGE8
T Cell Receptor And Co Stimulatory Signaling WP2583	2/28	7.14	0.818105	0.925794	0.64	0.1285	NFKBIA;AKT1
Cholesterol Biosynthesis Pathway WP197	1/15	6.67	0.817746	0.925794	0.5944	0.1196	MVD
Interactome Of Polycomb Repressive Complex 2 PRC2 WP2916	1/16	6.25	0.837308	0.92993	0.5547	0.0985	ELL
Statin Inhibition Of Cholesterol Production WP430	2/29	6.9	0.833162	0.92993	0.6162	0.1125	DGAT1;PLTP
Galanin Receptor Pathway WP4970	1/16	6.25	0.837308	0.92993	0.5547	0.0985	VEGFA
Osteoblast Differentiation And Related Diseases WP4787	10/118	8.47	0.826029	0.92993	0.7697	0.1471	MAPK11;NOTCH1;JAG1;PRKCB;LRP5;FGFR4;FGFR3;MAPK4;MAPK12;MAPK3
2Q21 1 Copy Number Variation Syndrome WP5223	1/16	6.25	0.837308	0.92993	0.5547	0.0985	MZT2A
Calcium Regulation In Cardiac Cells WP536	13/151	8.61	0.835261	0.92993	0.7828	0.1409	GNAZ;RGS14;PRKCB;ADCY7;GNAI2;RGS4;RGS3;PRKAR1B;GNB2;GNA11;GRK6;ORAI1;CAMK2G
Cardiac Progenitor Differentiation WP2406	4/53	7.55	0.834258	0.92993	0.6789	0.123	NOTCH1;BMP1;CXCR4;NRG1
TCA Cycle And Deficiency Of Pyruvate Dehydrogenase Complex PDHc WP2453	1/16	6.25	0.837308	0.92993	0.5547	0.0985	PC
SREBF And miR33 In Cholesterol And Lipid Homeostasis WP2011	1/16	6.25	0.837308	0.92993	0.5547	0.0985	SIRT6
SARS CoV 2 Nsp1 Inhibits Translation Initiation In Host Cell WP5027	1/16	6.25	0.837308	0.92993	0.5547	0.0985	EIF3G
Familial Hyperlipidemia Type 2 WP5109	1/16	6.25	0.837308	0.92993	0.5547	0.0985	PLTP
Airway Smooth Muscle Cell Contraction WP4962	1/16	6.25	0.837308	0.92993	0.5547	0.0985	GDI1
Cell Cycle WP179	10/120	8.33	0.841115	0.932783	0.7556	0.1307	MAD2L2;ZBTB17;FZR1;GADD45B;MCM5;E2F4;MAD1L1;ANAPC2;ANAPC11;MCM2
Vitamin B12 Metabolism WP1533	4/54	7.41	0.84492	0.935526	0.6653	0.1121	TCN2;IL1B;SERPINE1;NFKB2
SARS CoV 2 Innate Immunity Evasion And Cell Immune Response WP5039	5/66	7.58	0.849605	0.935526	0.6816	0.1111	CXCL8;IRF3;BSG;TRAF2;CXCL2
Regulation Of Wnt B Catenin Signaling Small Molecule Compounds WP3664	1/17	5.88	0.85477	0.935526	0.52	0.0816	AXIN1
Serotonin And Anxiety WP3947	1/17	5.88	0.85477	0.935526	0.52	0.0816	PRKCB
Hedgehog Signaling WP4249	3/43	6.98	0.854186	0.935526	0.6238	0.0983	GRK2;KIF7;CSNK1G2
Cholesterol Biosynthesis Pathway In Hepatocytes WP5329	3/43	6.98	0.854186	0.935526	0.6238	0.0983	CYP27A1;NR1H2;MVD
Inflammatory Bowel Disease Signaling WP5198	3/43	6.98	0.854186	0.935526	0.6238	0.0983	IL1A;JUN;STAT4
Leptin Insulin Signaling Overlap WP3935	1/17	5.88	0.85477	0.935526	0.52	0.0816	AKT1
Fatty Acid Omega Oxidation WP206	1/17	5.88	0.85477	0.935526	0.52	0.0816	CYP1A1
GABA Receptor Signaling WP4159	2/31	6.45	0.859939	0.938455	0.5737	0.0866	AP2A1;AP2A2
Tumor Suppressor Activity Of SMARCB1 WP4204	2/31	6.45	0.859939	0.938455	0.5737	0.0866	SMARCD3;DPF1
Renin Angiotensin Aldosterone System RAAS WP4756	3/44	6.82	0.864822	0.942419	0.6085	0.0884	CREB3;HSD3B2;CAMK2G
Hair Follicle Development Organogenesis Part 2 Of 3 WP2839	2/32	6.25	0.871798	0.944267	0.5545	0.0761	LRP5;PDGFA
Wnt Signaling WP428	9/113	7.96	0.867775	0.944267	0.7192	0.102	FOSL1;PORCN;JUN;PRKCB;DVL1;AXIN1;LRP5;CAMK2G;NFATC4
15Q25 Copy Number Variation WP5408	3/45	6.67	0.874769	0.944267	0.594	0.0795	EGF;SLC2A1;AP3B2
Fatty Acid Transporters WP5061	1/18	5.56	0.870359	0.944267	0.4894	0.068	SLC27A4
Sterol Regulatory Element Binding Proteins SREBP Signaling WP1982	5/69	7.25	0.875296	0.944267	0.6495	0.0865	SEC13;NR1H2;AKT1;SCAP;MVD
miRNA Regulation Of DNA Damage Response WP1530	5/69	7.25	0.875296	0.944267	0.6495	0.0865	GADD45B;PMAIP1;BAX;BBC3;RAD9A
Transcription Co Factors SKI And SKIL Protein Partners WP4533	1/18	5.56	0.870359	0.944267	0.4894	0.068	TEAD3
DNA IR Damage And Cellular Response Via ATR WP4016	6/81	7.41	0.878657	0.946536	0.665	0.086	RECQL4;UPF1;TRIM28;IKBKG;MCM2;RAD9A
Small Ligand GPCRs WP247	1/19	5.26	0.884275	0.947168	0.4622	0.0568	S1PR2
Host Pathogen Interaction Of Human CoVs Autophagy WP4863	1/19	5.26	0.884275	0.947168	0.4622	0.0568	ULK1
Apoptosis Modulation By HSP70 WP384	1/19	5.26	0.884275	0.947168	0.4622	0.0568	TNFRSF1A
Phosphatidyl Inositol Phosphate Pathway WP5411	3/46	6.52	0.884061	0.947168	0.5802	0.0715	PIP5K1C;PLCD3;PLCD1
ADHD And Autism ASD Pathways WP5420	33/370	8.92	0.890678	0.951736	0.8122	0.094	NADSYN1;WDR45;COMT;RPTOR;ATG101;AKT2;KYNU;MLST8;AKT1;HOMER3;SLC19A1;PDGFRB;CBR1;PRKCB;AKR1C1;SLC52A2;AKR1C3;TSC2;GCAT;APRT;SLC25A39;PRKAR1B;TCN2;IMPDH1;AKT1S1;ATG2A;ULK1;KYAT1;SCN2A;DAGLB;STX1A;ADA;CD320
Cohesin Complex Cornelia De Lange Syndrome WP5117	2/34	5.88	0.892785	0.951736	0.5198	0.059	PTPA;MAU2
Cholesterol Metab With Bloch And Kandutsch Russell Pathways WP4718	3/47	6.38	0.892733	0.951736	0.5669	0.0643	CYP27A1;NR1H2;MVD
Ca Mediated T Cell Apoptosis Inclusion Body Myositis WP5142	1/20	5	0.896698	0.951736	0.4378	0.0477	NR4A1
Lipid Metabolism In Senescent Cells WP5149	1/20	5	0.896698	0.951736	0.4378	0.0477	PLA2G6
10Q11 21Q11 23 Copy Number Variation Syndrome WP5352	4/60	6.67	0.897387	0.951736	0.5938	0.0643	MYO1C;HSF1;HSF4;SIRT6
Nanomaterial Induced Apoptosis WP2507	1/20	5	0.896698	0.951736	0.4378	0.0477	BAX
Ciliopathies WP4803	15/184	8.15	0.898759	0.95185	0.737	0.0787	DYNC2I2;IFT140;CCDC103;ANKS3;CFAP410;KIF7;PKD1;CCDC28B;POC1A;IFT27;UNC119;NPHP4;B9D1;B9D2;CCNQ
Pancreatic Cancer Subtypes WP5390	3/48	6.25	0.900818	0.952642	0.5543	0.0579	S100A2;SLC2A1;ANXA10
Fatty Acids And Lipoproteins Transport In Hepatocytes WP5323	2/35	5.71	0.902037	0.952642	0.504	0.052	OSBPL5;SLC27A4
ncRNAs In Wnt Signaling In Hepatocellular Carcinoma WP4336	6/85	7.06	0.904696	0.952778	0.6312	0.0632	FOSL1;PORCN;JUN;DVL1;AXIN1;LRP5
MECP2 And Associated Rett Syndrome WP3584	5/73	6.85	0.903667	0.952778	0.6112	0.0619	GAMT;MAG;CSRP1;BDNF;AKT1
Pathogenesis Of SARS CoV 2 Mediated By Nsp9 Nsp10 Complex WP4884	1/21	4.76	0.907788	0.954699	0.4159	0.0402	CXCL8
Wnt Signaling In Kidney Disease WP4150	2/36	5.56	0.910538	0.956256	0.4892	0.0458	DVL1;LRP5
Methionine De Novo And Salvage Pathway WP3580	1/22	4.55	0.917688	0.962422	0.3961	0.034	TXN
Bardet Biedl Syndrome WP5234	6/88	6.82	0.920923	0.964471	0.608	0.0501	DYNC2I2;IFT140;IFT27;CFAP410;KIF7;PKD1
Wnt Signaling And Pluripotency WP399	7/101	6.93	0.926393	0.967509	0.6186	0.0473	FOSL1;PTPA;JUN;PRKCB;DVL1;AXIN1;LRP5
Sleep Regulation WP3591	2/38	5.26	0.925506	0.967509	0.4619	0.0358	CST3;ADA
Allograft Rejection WP2328	6/90	6.67	0.930347	0.970293	0.5934	0.0428	IL1A;CD40;CXCL8;IL1B;CD55;VEGFA
GPCRs Class B Secretin Like WP334	1/24	4.17	0.934415	0.971843	0.3616	0.0245	GLP2R
Kynurenine Pathway And Links To Cell Senescence WP5044	1/24	4.17	0.934415	0.971843	0.3616	0.0245	KYNU
Differentiation Of White And Brown Adipocyte WP2895	1/25	4	0.941457	0.976336	0.3465	0.0209	CEBPB
lncRNA In Canonical Wnt Signaling And Colorectal Cancer WP4258	6/93	6.45	0.942625	0.976336	0.5729	0.0338	FOSL1;PORCN;JUN;DVL1;AXIN1;LRP5
Mammalian Disorder Of Sexual Development WP4842	1/25	4	0.941457	0.976336	0.3465	0.0209	MAPK11
Interactions Of Natural Killer Cells In Pancreatic Cancer WP5092	1/28	3.57	0.958364	0.987207	0.308	0.0131	GATA2
15Q11Q13 Copy Number Variation WP5407	3/58	5.17	0.956045	0.987207	0.4533	0.0204	GJD3;NECAB3;STX1A
Peptide GPCRs WP24	4/72	5.56	0.95775	0.987207	0.4887	0.0211	OPRD1;MC1R;CXCR4;GRPR
Interactions Immune Cells And miRNAs In Tumor Microenvironment WP4559	1/28	3.57	0.958364	0.987207	0.308	0.0131	NFKB2
Selective Expression Of Chemokine Receptors T Cell Polarization WP4494	1/29	3.45	0.962836	0.989107	0.297	0.0112	CXCR4
Primary Ovarian Insufficiency WP5461	9/136	6.62	0.962397	0.989107	0.5882	0.0225	RECQL4;SPATA33;CLPP;ATG9A;SWI5;LMNA;WDR62;HROB;CYP19A1
Circadian Rhythm Genes WP3594	14/201	6.97	0.973457	0.990723	0.6207	0.0167	NGFR;JUN;SUV39H1;CAVIN3;SERPINE1;NR2F6;RELB;PPP1CA;CST3;RAI1;CLDN4;GNA11;ID3;ADA
G1 To S Cell Cycle Control WP45	3/64	4.69	0.973619	0.990723	0.4086	0.0109	CREB3;MCM5;MCM2
GPCRs Other WP117	5/91	5.49	0.972716	0.990723	0.4827	0.0134	GPR162;ADGRD1;ADGRG1;GPR55;GRPR
GDNF RET Signaling Axis WP4830	1/30	3.33	0.966827	0.990723	0.2867	0.0097	IFT27
Endothelin Pathways WP2197	1/32	3.12	0.97357	0.990723	0.2682	0.0072	RAMP1
Development And Heterogeneity Of The ILC Family WP3893	1/32	3.12	0.97357	0.990723	0.2682	0.0072	IL1B
10Q22Q23 Copy Number Variation WP5402	3/62	4.84	0.968674	0.990723	0.4224	0.0134	MAD2L2;ROPN1L;VEGFA
Monoamine GPCRs WP58	1/33	3.03	0.976409	0.991832	0.2598	0.0062	ADRA2C
Cell Lineage Map For Neuronal Differentiation WP5417	8/132	6.06	0.977343	0.991832	0.5353	0.0123	NGFR;NOTCH1;TUBB3;HOMER3;AP2A1;ADRA2C;NES;AP2A2
Primary Ovarian Insufficiency WP5316	11/170	6.47	0.979141	0.992319	0.5737	0.0121	RECQL4;BDNF;CLPP;SERPINE1;ATG9A;LMNA;AKT1;TSC2;WDR62;COMT;CYP19A1
17Q12 Copy Number Variation Syndrome WP5287	5/100	5	0.98619	0.99678	0.4368	0.0061	PGAP3;RASL10B;RFFL;PLXDC1;NLE1
Interferon Mediated Signaling WP4558	1/37	2.7	0.985026	0.99678	0.2309	0.0035	TYK2
Prader Willi And Angelman Syndrome WP3998	3/102	2.94	0.999188	0.999995	0.2512	0.0002	SEC13;BDNF;TUBGCP6
Retinoblastoma Gene In Cancer WP2446	2/87	2.3	0.999415	0.999995	0.1951	0.0001	CDT1;SUV39H1
Mesodermal Commitment Pathway WP2857	3/145	2.07	0.999985	0.999995	0.1747	0	TRIM28;SRF;AXIN1
GPCRs Class A Rhodopsin Like WP455	6/259	2.32	0.999995	0.999995	0.1952	0	OPRD1;MC1R;CXCR4;GRPR;ADRA2C;F2RL2
Phosphodiesterases In Neuronal Function WP4222	1/54	1.85	0.997831	0.999995	0.1567	0.0003	ADCY7
Hair Follicle Development Cytodifferentiation Stage 3 Of 3 WP2840	3/87	3.45	0.996661	0.999995	0.2963	0.001	JUN;NOTCH1;HR
Endoderm Differentiation WP2853	7/140	5	0.994704	0.999995	0.4363	0.0023	MAP2K3;MAD2L2;ZBTB17;DUSP5;DUSP2;NOTCH1;PTHLH
Development Of Ureteric Derived Collecting System WP5053	2/60	3.33	0.990989	0.999995	0.2864	0.0026	RARA;ILK

## Sheet: Reactome_UP
Reactome Pathways 2024 | Upregulated DEGs | Sorted by Adjusted P-value | Bold = shown in figure
Top 20 sig. → orange | Other sig. → yellow | Bold = pathway shown in figure (3 pathways) | Significant (adj.p<0.05): 119/1737
Term	Overlap	Overlap (%)	P-value	Adjusted P-value	Odds Ratio	Combined Score	Genes
Cellular Responses to Stimuli	151/887	17.02	4.32462e-09	3.75593e-06	1.7614	33.9223	CRTC2;KEAP1;RPL8;PSMD8;RPS15;MT2A;TUBB6;H2AC14;CAPNS1;RPL18A;RPS19;TUBB3;AKT2;PSMD3;RPS6KA1;RPL36;LONP1;AKT1;PIEZO1;RPL35;H4C1;RPS10;MAP2K3;G6PD;H2AC6;DDX11;RPS5;TALDO1;CYBA;PGD;TUBA4A;PRKAR1B;ERF;PREB;TRIB3;SQSTM1;ANAPC2;CUL7;NOTCH1;RPS19BP1;SHC1;NPRL3;PDGFA;LY96;TXN;DEDD2;ANAPC11;DPP3;RAI1;PRDX2;HMOX1;MAP2K7;ATP6V1F;ZBTB17;JUN;ACD;PHC2;WFS1;HMGA1;H1-2;H1-5;NFKBIA;H1-4;MOV10;RPS28;NPLOC4;UBE2S;G…
Cellular Responses to Stress	138/787	17.53	3.02896e-09	3.75593e-06	1.8229	35.7566	CRTC2;KEAP1;RPL8;PSMD8;RPS15;TUBB6;H2AC14;RPL18A;RPS19;TUBB3;AKT2;PSMD3;RPS6KA1;RPL36;LONP1;AKT1;RPL35;H4C1;RPS10;MAP2K3;G6PD;H2AC6;DDX11;RPS5;TALDO1;CYBA;PGD;TUBA4A;ERF;PREB;TRIB3;SQSTM1;ANAPC2;CUL7;NOTCH1;RPS19BP1;SHC1;NPRL3;PDGFA;LY96;TXN;DEDD2;ANAPC11;DPP3;RAI1;PRDX2;HMOX1;MAP2K7;ATP6V1F;ZBTB17;JUN;ACD;PHC2;WFS1;HMGA1;H1-2;H1-5;H1-4;MOV10;RPS28;NPLOC4;UBE2S;MAFG;ID1;MAFK;GCLM;ACADVL;CXCL8;SRX…
Nuclear Events Mediated by NFE2L2	27/87	31.03	2.10595e-07	0.000121934	3.7808	58.1236	NOTCH1;SRXN1;KEAP1;PDGFA;SLC7A11;TXN;PSMA7;PSMD8;PSMB6;PSMB5;PSMD3;HMOX1;ABCC3;G6PD;EGF;TXNRD1;ADRM1;GSR;TALDO1;PGD;PSMC3;PSMC4;MAFG;MAFK;TKT;GCLM;SQSTM1
KEAP1-NFE2L2 Pathway	31/119	26.05	2.00654e-06	0.000871339	2.9607	38.8412	NOTCH1;SRXN1;KEAP1;PDGFA;TXN;SLC7A11;PSMA7;DPP3;PSMD8;PSMB6;PSMB5;AKT2;PSMD3;AKT1;HMOX1;ABCC3;G6PD;EGF;TXNRD1;ADRM1;GSR;TALDO1;PGD;NPLOC4;PSMC3;PSMC4;MAFG;MAFK;GCLM;TKT;SQSTM1
Cellular Response to Chemical Stress	44/202	21.78	3.47546e-06	0.00104168	2.3457	29.4847	NOTCH1;SMARCD3;SRXN1;GSTP1;KEAP1;PDGFA;TXN;SLC7A11;COX5B;PSMA7;DPP3;PSMD8;PSMB6;PRDX2;PSMB5;RXRA;SIN3B;AKT2;PSMD3;AKT1;HMOX1;COX8A;ABCC3;G6PD;GPX1;EGF;TXNRD2;TXNRD1;GSR;ADRM1;TALDO1;CYBA;PGD;ATOX1;CCS;NPLOC4;PSMC3;PSMC4;MAFG;BLVRB;MAFK;TKT;GCLM;SQSTM1
Inhibition of DNA Recombination at Telomere	17/47	36.17	3.59819e-06	0.00104168	4.7466	59.4994	H2BC9;ACD;H2AC6;H2BC5;H2BC17;H2BC12;H2BC13;H2AC14;H2BC15;H2BC21;H2BC11;POLR2E;POLR2F;H4C1;POLR2I;POLR2J;POLR2L
Cleavage of the Damaged Purine	14/36	38.89	9.82441e-06	0.0017065	5.3253	61.4044	H2BC9;ACD;H2AC6;H2BC5;MPG;H2BC17;H2BC12;H2BC13;H2AC14;H2BC15;H2BC21;H2BC11;H4C1;MUTYH
Recognition and Association of DNA Glycosylase With Site Containing an Affected Purine	14/36	38.89	9.82441e-06	0.0017065	5.3253	61.4044	H2BC9;ACD;H2AC6;H2BC5;MPG;H2BC17;H2BC12;H2BC13;H2AC14;H2BC15;H2BC21;H2BC11;H4C1;MUTYH
Depurination	14/36	38.89	9.82441e-06	0.0017065	5.3253	61.4044	H2BC9;ACD;H2AC6;H2BC5;MPG;H2BC17;H2BC12;H2BC13;H2AC14;H2BC15;H2BC21;H2BC11;H4C1;MUTYH
HDACs Deacetylate Histones	19/60	31.67	9.34847e-06	0.0017065	3.883	44.9664	H2BC9;MBD3;H2AC6;H2BC5;GPS2;H2BC17;H2BC18;H2AC11;H2BC12;H2AC12;H2BC13;H2AC14;BRMS1;H2BC15;H2BC21;H2BC11;H2AC21;HMG20B;H4C1
Assembly of the Pre-Replicative Complex	26/101	25.74	1.64129e-05	0.00259175	2.9088	32.0475	PSMA7;ANAPC11;PSMD8;PSMB6;FZR1;H2AC14;PSMB5;H2BC21;PSMD3;H4C1;H2BC9;CDT1;H2AC6;H2BC5;ADRM1;H2BC17;H2BC12;H2BC13;H2BC15;PSMC3;UBE2S;PSMC4;H2BC11;MCM5;ANAPC2;MCM2
Base-Excision Repair, AP Site Formation	15/43	34.88	2.21444e-05	0.0032054	4.4837	48.0554	H2BC9;ACD;H2AC6;H2BC5;MPG;H2BC17;H2BC12;H2BC13;H2AC14;H2BC15;NTHL1;H2BC21;H2BC11;H4C1;MUTYH
Base Excision Repair	20/71	28.17	3.7744e-05	0.00504318	3.2856	33.4631	H2BC9;ACD;H2AC6;LIG1;H2BC5;MPG;PNKP;H2BC17;H2BC12;H2BC13;POLD4;H2AC14;H2BC15;NTHL1;H2BC21;POLD1;H2BC11;ADPRS;H4C1;MUTYH
RNA Polymerase I Promoter Opening	12/31	38.71	4.48761e-05	0.00556784	5.2812	52.8735	H2BC9;H2BC12;H2BC13;H2AC14;H2BC15;H2AC6;H2BC5;H2BC21;H2BC11;H4C1;H2BC17;MAPK3
Extracellular Matrix Organization	55/300	18.33	4.9978e-05	0.00578745	1.8915	18.7334	COL18A1;PTPRS;COL16A1;SERPINE1;ICAM3;PLOD3;PLOD1;CAPN15;LOXL1;LOXL2;ADAMTS4;EFEMP2;MMP24;CAPNS1;CTSL;BSG;ITGAX;EMILIN1;TIMP1;CAPN1;CTSD;COL27A1;VWF;ITGA3;ACTN1;P3H3;HSPG2;MMP9;MMP12;MMP13;ADAM15;COL4A2;MMP15;COL6A2;MMP17;COL6A1;ITGA5;PLEC;CD151;PCOLCE2;LTBP4;PDGFA;LTBP2;FURIN;LTBP3;SPOCK3;SPP1;COL24A1;LAMB3;LAMB2;BMP1;CAPN10;COL5A3;COL9A3;AGRN
RHO GTPases Activate PKNs	18/62	29.03	5.88388e-05	0.00638769	3.4256	33.3681	H2BC9;H2AC6;H2BC5;PKN3;RHOC;H2BC17;RHOB;H2BC12;H2BC13;MYL6;H2AC14;H2BC15;H2BC21;H2BC11;MYH9;MYH14;H4C1;PKN1
Packaging Of Telomere Ends	12/32	37.5	6.4822e-05	0.00662329	5.0169	48.3821	H2BC9;H2BC12;H2BC13;ACD;H2AC14;H2BC15;H2AC6;H2BC5;H2BC21;H2BC11;H4C1;H2BC17
Telomere Maintenance	23/92	25	8.08386e-05	0.00780093	2.7939	26.3271	H2BC9;ACD;H2AC6;LIG1;H2BC5;CHTF18;H2BC17;H2BC12;H2BC13;POLD4;H2AC14;H2BC15;H2BC21;RUVBL2;POLD1;H2BC11;POLR2E;POLR2F;H4C1;POLR2I;POLR2J;POLR2L;WRAP53
Senescence-Associated Secretory Phenotype (SASP)	21/81	25.93	9.27074e-05	0.00847541	2.9323	27.2297	H2BC9;CEBPB;JUN;CXCL8;H2AC6;H2BC5;H2BC17;ANAPC11;H2BC12;H2BC13;IL1A;FZR1;H2AC14;H2BC15;UBE2S;H2BC21;RPS6KA1;H2BC11;H4C1;ANAPC2;MAPK3
Metabolism	286/2181	13.11	0.000111508	0.00922328	1.2957	11.7929	ECI1;NUDT1;XYLT2;ENO1;ENO2;RPL8;NADSYN1;HS6ST1;ENO3;NUBP1;NUBP2;RPS15;PSMD8;RPL18A;RPS19;PSMD3;RPL36;FDXR;AKT1;RPL35;CIAO2B;RPS10;GAMT;ARSA;ACOT8;ACOT7;ENTPD6;TALDO1;SLC51B;HSPG2;GCAT;TIAM2;CYP27A1;POR;PRKAR1B;UQCRC1;FDX2;TRIB3;PLPP2;STX1A;PTGES;MTARC1;TXN;PLA2G6;SDSL;CIAO3;OAZ1;SULT1A1;ARSL;HMOX1;SCAP;B4GALNT1;ASL;PIP5K1C;RIMKLA;SLC19A1;SULT1A2;ST3GAL3;GSTM4;GSTM3;CHKB;STARD10;MTHFS;PARP10;CYP26…
Ub-specific Processing Proteases	38/190	20	0.000110996	0.00922328	2.1005	19.1272	USP11;KEAP1;PSMA7;H2AC11;PSMD8;PSMB6;H2AC12;H2AC14;PSMB5;H2BC21;PSMD3;RCE1;IKBKG;H2BC9;H2AC6;USP5;H2BC5;USP20;ADRM1;AXIN1;TRAF2;H2BC17;H2BC18;SMAD7;NFKBIA;H2BC12;H2BC13;H2BC15;PSMC3;HGS;PSMC4;H2AC21;TADA3;H2BC11;FKBP8;TAB1;BIRC3;OTUB1
SIRT1 Negatively Regulates rRNA Expression	13/39	33.33	0.000132413	0.0104546	4.1813	37.3371	H2BC9;H2AC6;H2BC5;SUV39H1;H2BC17;H2BC12;H2BC13;H2AC14;H2BC15;TAF1C;H2BC21;H2BC11;H4C1
Assembly of Collagen Fibrils and Other Multimeric Structures	17/61	27.87	0.000163267	0.0109075	3.2338	28.1991	COL18A1;COL27A1;CD151;COL24A1;LAMB3;MMP9;LOXL1;LOXL2;MMP13;BMP1;COL4A2;CTSL;COL6A2;COL5A3;COL6A1;COL9A3;PLEC
Cytosolic Iron-Sulfur Cluster Assembly	7/13	53.85	0.000154378	0.0109075	9.7399	85.4781	NDOR1;POLD1;ERCC2;CIAO2B;CIAO3;NUBP1;NUBP2
Interleukin-1 Signaling	24/102	23.53	0.000158766	0.0109075	2.5789	22.5604	LRRC14;NLRX1;IL1R1;PELI3;ADRM1;NLRC5;TRAF2;PSMA7;NFKB2;PSMD8;NFKBIA;PSMB6;IL1A;PSMB5;IRAK1;PSMC3;PSMC4;TNIP2;IL1B;PSMD3;TAB1;IKBKG;SQSTM1;NFKBIB
Collagen Formation	22/90	24.44	0.000163056	0.0109075	2.7106	23.6403	COL18A1;COL16A1;COL27A1;CD151;PCOLCE2;COL24A1;LAMB3;PLOD3;PLOD1;P3H3;MMP9;LOXL1;LOXL2;MMP13;BMP1;COL4A2;CTSL;COL6A2;COL5A3;COL6A1;COL9A3;PLEC
Cellular Senescence	34/167	20.36	0.000174277	0.0109407	2.1461	18.5743	CEBPB;CXCL8;TXN;ANAPC11;FZR1;H2AC14;H2BC21;RPS6KA1;H4C1;MAP2K7;MAPK3;MAP2K3;H2BC9;ACD;JUN;PHC2;H2AC6;H2BC5;HMGA1;H2BC17;H1-2;H1-5;H2BC12;H1-4;MOV10;H2BC13;IL1A;MAPK11;H2BC15;UBE2S;ID1;H2BC11;ERF;ANAPC2
Activated PKN1 Stimulates Transcription of AR (Androgen Receptor) Regulated Genes KLK2 and KLK3	12/35	34.29	0.000176362	0.0109407	4.3618	37.6986	H2BC9;H2BC12;H2BC13;H2AC14;H2BC15;H2AC6;H2BC5;H2BC21;H2BC11;H4C1;PKN1;H2BC17
Recognition and Association of DNA Glycosylase With Site Containing an Affected Pyrimidine	13/41	31.71	0.000234009	0.0127561	3.8822	32.4557	H2BC9;ACD;H2AC6;H2BC5;H2BC17;H2BC12;H2BC13;H2AC14;H2BC15;NTHL1;H2BC21;H2BC11;H4C1
Cleavage of the Damaged Pyrimidine	13/41	31.71	0.000234009	0.0127561	3.8822	32.4557	H2BC9;ACD;H2AC6;H2BC5;H2BC17;H2BC12;H2BC13;H2AC14;H2BC15;NTHL1;H2BC21;H2BC11;H4C1
Depyrimidination	13/41	31.71	0.000234009	0.0127561	3.8822	32.4557	H2BC9;ACD;H2AC6;H2BC5;H2BC17;H2BC12;H2BC13;H2AC14;H2BC15;NTHL1;H2BC21;H2BC11;H4C1
Signaling by Receptor Tyrosine Kinases	84/536	15.67	0.000234999	0.0127561	1.5692	13.1124	PRR5;PTPRU;PTPRS;AP2A1;TCIRG1;SHB;AP2A2;FGFRL1;PTBP1;MDK;AKT2;RPS6KA1;MLST8;AKT1;NELFB;JUNB;CTSD;SH3GL1;PSENEN;PDGFRB;ATP6V0B;COL27A1;MAP2K2;PRKCB;ITGA3;SPHK1;NRG1;CYBA;GTF2F1;VRK3;MMP9;DNM1;EPN1;COL4A2;VGF;HGS;CDC37;COL6A2;COL6A1;TRIB3;ATP6V0C;SHC1;SRC;SRF;PDGFA;FURIN;SPP1;POLR2E;POLR2F;CSK;POLR2I;AAMP;POLR2J;RALGDS;POLR2L;ATP6V1F;MAPK3;COL24A1;JUP;LAMB3;BDNF;EGF;LAMB2;TNK2;ADAP1;BAIAP2;MAPK12;V…
Post-chaperonin Tubulin Folding Pathway	9/22	40.91	0.000249391	0.013127	5.7828	47.9773	TUBA1C;TUBB2B;TUBB6;TUBB2A;TUBB3;ARL2;TBCB;TUBB4B;TUBA4A
DNA Replication Pre-Initiation	26/118	22.03	0.000268001	0.0136917	2.369	19.4842	PSMA7;ANAPC11;PSMD8;PSMB6;FZR1;H2AC14;PSMB5;H2BC21;PSMD3;H4C1;H2BC9;CDT1;H2AC6;H2BC5;ADRM1;H2BC17;H2BC12;H2BC13;H2BC15;PSMC3;UBE2S;PSMC4;H2BC11;MCM5;ANAPC2;MCM2
RHO GTPase Effectors	51/291	17.53	0.000289779	0.0143813	1.7876	14.5623	RTKN;TUBA1C;TUBB6;H2AC14;TUBB3;H2BC21;RAC2;H4C1;SEC13;H2AC6;PRKCB;RHOG;CYBA;RHOC;RANGAP1;H2BC17;TUBA4A;RHOB;H2BC12;H2BC13;MYL6;TUBB2B;TUBB2A;H2BC15;H2BC11;MYH9;TAX1BP3;MAD1L1;PKN3;SRC;SRF;LIN7B;PMF1;NCKIPSD;KLC4;KLC2;DVL1;FLNA;MYH14;MAPK3;CENPT;H2BC9;H2BC5;LIMK1;TUBB4B;BAIAP2;MAPK11;CENPM;PIN1;B9D2;PKN1
TNFR2 Non-Canonical NF-kB Pathway	21/88	23.86	0.000324377	0.0148274	2.6249	21.0876	CD40;TNFRSF12A;CD70;ADRM1;TRAF2;PSMA7;TNFRSF1A;RELB;NFKB2;PSMD8;PSMB6;PSMB5;PSMC3;PSMC4;PSMD3;TNFRSF8;TNFSF9;LTBR;MAP3K14;BIRC3;UBE2M
Pausing and Recovery of Tat-mediated HIV Elongation	11/32	34.38	0.000318842	0.0148274	4.3775	35.2426	CTDP1;ELL;POLR2E;POLR2F;ELOB;NELFB;NELFA;POLR2I;GTF2F1;POLR2J;POLR2L
Tat-mediated HIV Elongation Arrest and Recovery	11/32	34.38	0.000318842	0.0148274	4.3775	35.2426	CTDP1;ELL;POLR2E;POLR2F;ELOB;NELFB;NELFA;POLR2I;GTF2F1;POLR2J;POLR2L
Recycling Pathway of L1	14/48	29.17	0.000361876	0.0150885	3.4435	27.2869	SRC;AP2A1;L1CAM;TUBB4B;AP2A2;DNM1;TUBA4A;RPS6KA4;TUBA1C;TUBB6;TUBB2B;TUBB2A;TUBB3;RPS6KA1
Degradation of the Extracellular Matrix	29/140	20.71	0.00037352	0.0150885	2.1908	17.2913	COL18A1;COL16A1;FURIN;CAPN15;ADAMTS4;MMP24;CAPNS1;CTSL;BSG;SPOCK3;SPP1;CAPN1;TIMP1;CTSD;LAMB3;HSPG2;MMP9;MMP12;BMP1;MMP13;ADAM15;COL4A2;MMP15;CAPN10;COL5A3;COL6A2;COL6A1;MMP17;COL9A3
Abortive Elongation of HIV-1 Transcript in the Absence of Tat	9/23	39.13	0.000370898	0.0150885	5.3695	42.4167	CTDP1;POLR2E;POLR2F;NELFB;NELFA;GTF2F1;POLR2I;POLR2J;POLR2L
B-WICH Complex Positively Regulates rRNA Expression	16/59	27.12	0.000354457	0.0150885	3.1131	24.7331	H2BC9;H2AC6;H2BC5;H2BC17;H2BC12;H2BC13;H2AC14;H2BC15;MYO1C;TAF1C;H2BC21;H2BC11;POLR2E;POLR2F;H4C1;POLR2L
RNA Polymerase I Promoter Escape	16/59	27.12	0.000354457	0.0150885	3.1131	24.7331	H2BC9;H2AC6;H2BC5;H2BC17;H2BC12;H2BC13;H2AC14;H2BC15;TAF1C;H2BC21;H2BC11;ERCC2;POLR2E;POLR2F;H4C1;POLR2L
DNA Methylation	11/33	33.33	0.000432279	0.0159028	4.1783	32.367	H2BC9;H2BC12;H2BC13;H2AC14;H2BC15;H2AC6;H2BC5;H2BC21;H2BC11;H4C1;H2BC17
HIV Elongation Arrest and Recovery	11/33	33.33	0.000432279	0.0159028	4.1783	32.367	CTDP1;ELL;POLR2E;POLR2F;ELOB;NELFB;NELFA;POLR2I;GTF2F1;POLR2J;POLR2L
NFE2L2 Regulating Anti-Oxidant Detoxification Enzymes	8/19	42.11	0.000439456	0.0159028	6.0727	46.9422	SRXN1;TXNRD1;GSR;HMOX1;MAFK;SLC7A11;TXN;GCLM
Pausing and Recovery of HIV Elongation	11/33	33.33	0.000432279	0.0159028	4.1783	32.367	CTDP1;ELL;POLR2E;POLR2F;ELOB;NELFB;NELFA;POLR2I;GTF2F1;POLR2J;POLR2L
DNA Damage Telomere Stress Induced Senescence	16/60	26.67	0.000435829	0.0159028	3.0421	23.5409	H2BC9;ACD;H2AC6;H2BC5;HMGA1;H2BC17;H1-2;H2BC12;H1-5;H2BC13;H1-4;H2AC14;H2BC15;H2BC21;H2BC11;H4C1
RUNX1 Regulates Transcription of Genes Involved in Differentiation of HSCs	20/85	23.53	0.000541646	0.0184478	2.5759	19.3733	H2BC9;H2AC6;H2BC5;ADRM1;GATA2;H2BC17;PSMA7;PSMD8;H2BC12;PSMB6;H2BC13;H2AC14;H2BC15;PSMB5;PSMC3;PSMC4;H2BC21;PSMD3;H2BC11;H4C1
DNA Replication	29/143	20.28	0.000539201	0.0184478	2.1328	16.0504	PSMA7;ANAPC11;PSMD8;PSMB6;POLD4;FZR1;H2AC14;PSMB5;H2BC21;POLD1;PSMD3;H4C1;H2BC9;CDT1;H2AC6;LIG1;H2BC5;ADRM1;H2BC17;H2BC12;H2BC13;H2BC15;PSMC3;UBE2S;PSMC4;H2BC11;MCM5;ANAPC2;MCM2
Replacement of Protamines by Nucleosomes in the Male Pronucleus	9/24	37.5	0.000537289	0.0184478	5.0112	37.7295	H2BC9;H2BC12;H2BC13;H2BC15;H2BC5;H2BC21;H2BC11;H4C1;H2BC17
Metabolism of Nucleotides	22/98	22.45	0.000586974	0.0196072	2.4242	18.0372	DTYMK;TXNRD1;ENTPD6;AK1;GSR;NUDT1;AMPD2;GLRX;TXN;AMPD3;DNPH1;UCKL1;APRT;TYMP;NT5C;GUK1;IMPDH1;NUDT18;NT5M;TK1;UPP1;ADA
NFE2L2 Regulates Pentose Phosphate Pathway Genes	5/8	62.5	0.000598401	0.0196117	13.9034	103.181	G6PD;MAFG;TALDO1;PGD;TKT
Chromosome Maintenance	25/119	21.01	0.000738037	0.0237402	2.2281	16.0683	CHTF18;POLD4;H2AC14;RUVBL2;H2BC21;POLD1;POLR2E;POLR2F;H4C1;POLR2I;POLR2J;POLR2L;CENPT;H2BC9;ACD;H2AC6;LIG1;H2BC5;H2BC17;H2BC12;H2BC13;H2BC15;H2BC11;CENPM;WRAP53
Basigin Interactions	9/25	36	0.000760188	0.0240081	4.6978	33.7391	SLC7A5;MAG;PPIL2;ITGA3;BSG;SLC3A2;SLC7A11;L1CAM;SLC16A3
DNA Repair	52/312	16.67	0.000856526	0.0261015	1.6813	11.8745	MUS81;UBXN1;ELL;MPG;BABAM1;ALKBH2;H2AC14;EME2;H2BC21;POLL;H4C1;FAAP100;PIAS4;H2AC6;LIG1;SIRT6;RAD23A;H2BC17;H2BC12;H2BC13;H2BC15;H2BC11;ADPRS;INO80E;GPS1;PNKP;FAAP20;POLD4;PPP4C;NTHL1;POLD1;POLR2E;POLR2F;APBB1;POLR2I;POLR2J;MUTYH;POLR2L;H2BC9;ACD;KDM4B;H2BC5;POLM;MCRS1;XRCC3;MAD2L2;XAB2;NPLOC4;ERCC1;ERCC2;BAP1;RAD9A
Post-translational Protein Phosphorylation	23/107	21.5	0.000847919	0.0261015	2.2931	16.2182	CSF1;SERPIND1;WFS1;PRKCSH;LAMB2;SHISA5;AFP;FSTL3;CST3;LGALS1;VGF;STC2;HRC;SPP1;FAM20C;VWA1;NUCB1;QSOX1;MELTF;TIMP1;GAS6;MFGE8;PNPLA2
Deubiquitination	46/268	17.16	0.000883699	0.0264653	1.7407	12.2394	INO80E;USP11;KEAP1;PSMA7;H2AC11;PSMD8;BABAM1;PSMB6;H2AC12;UCHL1;H2AC14;PSMB5;H2BC21;PSMD3;RCE1;IKBKG;H2BC9;H2BC5;H2AC6;USP5;USP20;MCRS1;ADRM1;AXIN1;RAD23A;TRAF2;H2BC17;H2BC18;SMAD7;NFKBIA;H2BC12;H2BC13;H2BC15;PSMC3;TNIP1;PSMC4;HGS;TNIP2;H2AC21;TADA3;H2BC11;FKBP8;TAB1;BAP1;BIRC3;OTUB1
Transcriptional Regulation of Granulopoiesis	15/58	25.86	0.00092258	0.0271614	2.9171	20.3859	H2BC9;CEBPB;H2AC6;H2BC5;GATA2;H2BC17;H2BC12;H2BC13;H2AC14;H2BC15;RXRA;H2BC21;H2BC11;RARA;H4C1
Constitutive Signaling by AKT1 E17K in Cancer	9/26	34.62	0.00105293	0.0304823	4.4212	30.3124	PRR5;NR4A1;BAD;AKT2;AKT1S1;RPS6KB2;MLST8;AKT1;TSC2
Condensation of Prophase Chromosomes	12/42	28.57	0.00114746	0.0326745	3.3427	22.6308	H2BC9;H2BC12;H2BC13;H2AC14;H2BC15;H2AC6;H2BC5;H2BC21;NCAPH2;H2BC11;H4C1;H2BC17
RHO GTPases Activate Rhotekin and Rhophilins	5/9	55.56	0.00122734	0.0333106	10.427	69.8911	RTKN;TAX1BP3;RHOC;LIN7B;RHOB
ESR-mediated Signaling	35/192	18.23	0.00119981	0.0333106	1.8699	12.5759	SHC1;SRC;SRF;GNAI2;H2AC14;AKT2;H2BC21;POLR2E;AKT1;POLR2F;H4C1;POLR2I;CTSD;POLR2J;MAPK3;POLR2L;H2BC9;JUN;KDM4B;H2AC6;H2BC5;PRMT1;EGF;SPHK1;AXIN1;GTF2F1;H2BC17;MMP9;USF2;H2BC12;MOV10;H2BC13;H2BC15;GNB2;H2BC11
Axon Guidance	81/541	14.97	0.00121446	0.0333106	1.484	9.963	ROBO3;RPLP1;CLTB;AP2A1;RPL8;AP2A2;PSMD8;RPS15;RPS6KA4;TUBA1C;TUBB6;RPL18A;RPS19;TUBB3;PSMD3;RPS6KA1;RPL36;RPL35;RPLP2;ELOB;RPS10;EPHB4;GIT1;PSENEN;LYPLA2;MAP2K2;RPS5;RHOC;MMP9;TUBA4A;DNM1;RHOB;DOK1;MYL6;TUBB2B;GAP43;TUBB2A;COL4A2;DOK4;COL6A2;COL6A1;KCNQ3;MYH9;ITGA5;EPHA2;SHC1;SRC;CXCR4;PSMA7;PSMB6;EFNB2;SPTA1;PSMB5;RRAS;GPC1;ZSWIM8;MYH14;PIP5K1C;RPL18;PDLIM7;PLXNA3;PAK4;MAPK3;VASP;PRNP;ST8SIA2;AD…
Activation of Anterior HOX Genes in Hindbrain Development During Early Embryogenesis	20/91	21.98	0.00134767	0.0339261	2.3574	15.5813	H2BC9;JUN;H2AC6;H2BC5;H2BC17;H2BC12;H2BC13;H2AC14;H2BC15;RXRA;H2BC21;H2BC11;RARA;POLR2E;POLR2F;H4C1;POLR2I;ZNF335;POLR2J;POLR2L
Recruitment and ATM-med Phosphorylation of Repair and Signaling Proteins at DNA Double Strand Breaks	15/60	25	0.00134307	0.0339261	2.7872	18.431	PIAS4;H2BC9;KDM4B;UBXN1;H2BC5;H2BC17;BABAM1;H2BC12;H2BC13;H2BC15;H2BC21;H2BC11;H4C1;APBB1;BAP1
Regulation of Endogenous Retroelements by Piwi-interacting RNAs (piRNAs)	16/66	24.24	0.00134115	0.0339261	2.6762	17.7009	H2BC9;MBD3;SMARCD3;H2AC6;H2BC5;H2BC17;H2BC12;SPOCD1;H2BC13;H2AC14;H2BC15;BCL7C;H2BC21;DPF1;H2BC11;H4C1
Activation of HOX Genes During Differentiation	20/91	21.98	0.00134767	0.0339261	2.3574	15.5813	H2BC9;JUN;H2AC6;H2BC5;H2BC17;H2BC12;H2BC13;H2AC14;H2BC15;RXRA;H2BC21;H2BC11;RARA;POLR2E;POLR2F;H4C1;POLR2I;ZNF335;POLR2J;POLR2L
Assembly of the ORC Complex at the Origin of Replication	11/37	29.73	0.00127591	0.0339261	3.5347	23.5555	H2BC9;H2BC12;H2BC13;H2AC14;H2BC15;H2AC6;H2BC5;H2BC21;H2BC11;H4C1;H2BC17
Regulation of IGF Transport and Uptake by Insulin-like Growth Factor Binding Proteins (IGFBPs)	25/124	20.16	0.00137233	0.0340535	2.115	13.9406	CSF1;PRKCSH;AFP;FSTL3;CST3;LGALS1;STC2;SPP1;QSOX1;IGFBP6;TIMP1;SERPIND1;WFS1;LAMB2;IGFBP2;SHISA5;VGF;HRC;FAM20C;VWA1;NUCB1;MELTF;GAS6;MFGE8;PNPLA2
RNA Polymerase I Promoter Clearance	18/79	22.78	0.0014915	0.0364893	2.4686	16.0655	H2BC9;MBD3;H2AC6;H2BC5;H2BC17;H2BC12;H2BC13;H2AC14;H2BC15;TAF1C;H2BC21;H2BC11;ERCC2;POLR2E;POLR2F;H4C1;MAPK3;POLR2L
Signaling by NOTCH	37/209	17.7	0.00153053	0.036924	1.8045	11.6971	HDAC5;NOTCH1;HDAC11;FURIN;RFNG;PSMA7;HDAC7;PSMD8;LFNG;PSMB6;H2AC14;PSMB5;MDK;H2BC21;PSMD3;DNER;AKT1;H4C1;ST3GAL3;PSENEN;H2BC9;JUN;JAG1;H2BC5;H2AC6;EGF;ADRM1;MIB2;SIRT6;H2BC17;H2BC12;MOV10;H2BC13;H2BC15;PSMC3;PSMC4;H2BC11
DNA Double Strand Break Response	15/61	24.59	0.00160731	0.0382451	2.7264	17.5396	PIAS4;H2BC9;KDM4B;UBXN1;H2BC5;H2BC17;BABAM1;H2BC12;H2BC13;H2BC15;H2BC21;H2BC11;H4C1;APBB1;BAP1
Formation of the Early Elongation Complex	10/33	30.3	0.00179175	0.0393958	3.6314	22.967	CTDP1;ERCC2;POLR2E;POLR2F;NELFB;NELFA;POLR2I;GTF2F1;POLR2J;POLR2L
Formation of HIV-1 Elongation Complex Containing HIV-1 Tat	12/44	27.27	0.00178757	0.0393958	3.1334	19.8249	CTDP1;ELL;ERCC2;POLR2E;POLR2F;ELOB;NELFB;NELFA;POLR2I;GTF2F1;POLR2J;POLR2L
HIV Transcription Elongation	12/44	27.27	0.00178757	0.0393958	3.1334	19.8249	CTDP1;ELL;ERCC2;POLR2E;POLR2F;ELOB;NELFB;NELFA;POLR2I;GTF2F1;POLR2J;POLR2L
Cell-extracellular Matrix Interactions	7/18	38.89	0.00176422	0.0393958	5.3112	33.673	VASP;FBLIM1;ACTN1;TESK1;ILK;FLNA;FLNC
Formation of the HIV-1 Early Elongation Complex	10/33	30.3	0.00179175	0.0393958	3.6314	22.967	CTDP1;ERCC2;POLR2E;POLR2F;NELFB;NELFA;POLR2I;GTF2F1;POLR2J;POLR2L
Tat-mediated Elongation of the HIV-1 Transcript	12/44	27.27	0.00178757	0.0393958	3.1334	19.8249	CTDP1;ELL;ERCC2;POLR2E;POLR2F;ELOB;NELFB;NELFA;POLR2I;GTF2F1;POLR2J;POLR2L
CLEC7A (Dectin-1) Signaling	19/87	21.84	0.00189866	0.0407158	2.3377	14.6493	SRC;ADRM1;PSMA7;RELB;NFKB2;PSMD8;PYCARD;PSMB6;NFKBIA;CDC34;PSMB5;PSMC3;PSMC4;IL1B;PSMD3;IKBKG;TAB1;MAP3K14;UBE2M
Regulation of TNFR1 Signaling	13/50	26	0.00188164	0.0407158	2.9364	18.4276	RNF31;SPPL2B;MIB2;TRAF2;TRAF1;TNFRSF1A;SHARPIN;ULK1;STUB1;IKBKG;RBCK1;IKBKE;BIRC3
Nucleotide Salvage	8/23	34.78	0.00192635	0.0408058	4.4523	27.8366	AMPD2;AMPD3;TK1;UPP1;ADA;APRT;TYMP;UCKL1
RNA Polymerase I Transcription	18/81	22.22	0.00201139	0.0414058	2.39	14.839	H2BC9;MBD3;H2AC6;H2BC5;H2BC17;H2BC12;H2BC13;H2AC14;H2BC15;TAF1C;H2BC21;H2BC11;ERCC2;POLR2E;POLR2F;H4C1;MAPK3;POLR2L
Regulation of Endogenous Retroelements by the Human Silencing Hub (HUSH) Complex	11/39	28.21	0.00204581	0.0414058	3.2818	20.3211	H2BC9;H2BC12;H2BC13;H2AC14;H2BC15;H2AC6;H2BC5;H2BC21;H2BC11;H4C1;H2BC17
Chromatin Modifications During the Maternal to Zygotic Transition (MZT)	11/39	28.21	0.00204581	0.0414058	3.2818	20.3211	H2BC9;H2BC12;H2BC13;H2AC14;H2BC15;H2AC6;H2BC5;H2BC21;H2BC11;H4C1;H2BC17
Nervous System Development	83/567	14.64	0.00205003	0.0414058	1.4447	8.9424	ROBO3;RPLP1;CLTB;AP2A1;RPL8;AP2A2;PSMD8;RPS15;RPS6KA4;TUBA1C;TUBB6;RPL18A;RPS19;TUBB3;PSMD3;RPS6KA1;PRX;RPL36;RPL35;RPLP2;ELOB;RPS10;EPHB4;GIT1;PSENEN;LYPLA2;MAP2K2;RPS5;RHOC;MMP9;TUBA4A;DNM1;RHOB;DOK1;MYL6;TUBB2B;MAG;GAP43;TUBB2A;COL4A2;DOK4;COL6A2;COL6A1;KCNQ3;MYH9;ITGA5;EPHA2;SHC1;SRC;CXCR4;PSMA7;PSMB6;EFNB2;SPTA1;PSMB5;RRAS;GPC1;ZSWIM8;MYH14;PIP5K1C;RPL18;PDLIM7;PLXNA3;PAK4;MAPK3;VASP;PRNP;ST…
Positive Epigenetic Regulation of rRNA Expression	17/75	22.67	0.00211478	0.0415632	2.4513	15.0971	H2BC9;MBD3;H2AC6;H2BC5;H2BC17;H2BC12;H2BC13;H2AC14;H2BC15;MYO1C;TAF1C;H2BC21;H2BC11;POLR2E;POLR2F;H4C1;POLR2L
Estrogen-dependent Gene Expression	24/121	19.83	0.00212961	0.0415632	2.0715	12.7437	H2BC9;JUN;KDM4B;H2AC6;H2BC5;PRMT1;AXIN1;GTF2F1;H2BC17;USF2;H2BC12;MOV10;H2BC13;H2AC14;H2BC15;H2BC21;H2BC11;POLR2E;POLR2F;H4C1;POLR2I;CTSD;POLR2J;POLR2L
Transcriptional Regulation by Small RNAs	17/75	22.67	0.00211478	0.0415632	2.4513	15.0971	H2BC9;SEC13;H2AC6;H2BC5;H2BC17;H2BC12;H2BC13;H2AC14;H2BC15;H2BC21;H2BC11;POLR2E;POLR2F;H4C1;POLR2I;POLR2J;POLR2L
Formation of HIV Elongation Complex in the Absence of HIV Tat	12/45	26.67	0.00220337	0.0420577	3.0383	18.5877	CTDP1;ELL;ERCC2;POLR2E;POLR2F;ELOB;NELFB;NELFA;POLR2I;GTF2F1;POLR2J;POLR2L
ERCC6 (CSB) and EHMT2 (G9a) Positively Regulate rRNA Expression	12/45	26.67	0.00220337	0.0420577	3.0383	18.5877	H2BC9;MBD3;H2BC12;H2BC13;H2AC14;H2BC15;H2AC6;H2BC5;H2BC21;H2BC11;H4C1;H2BC17
UCH Proteinases	18/82	21.95	0.00232374	0.0429397	2.3525	14.2668	INO80E;H2AC6;MCRS1;ADRM1;PSMA7;SMAD7;H2AC11;PSMD8;PSMB6;H2AC12;UCHL1;H2AC14;PSMB5;PSMC3;PSMC4;PSMD3;H2AC21;BAP1
Nonhomologous End-Joining (NHEJ)	13/51	25.49	0.00228148	0.0429397	2.859	17.3908	PIAS4;H2BC9;H2BC5;POLM;H2BC17;BABAM1;H2BC12;H2BC13;H2BC15;H2BC21;H2BC11;POLL;H4C1
Negative Epigenetic Regulation of rRNA Expression	18/82	21.95	0.00232374	0.0429397	2.3525	14.2668	H2BC9;H2AC6;H2BC5;SUV39H1;H2BC17;H2BC12;H2BC13;H2AC14;H2BC15;SIN3B;TAF1C;H2BC21;H2BC11;ERCC2;POLR2E;POLR2F;H4C1;POLR2L
TRAF6 Mediated Induction of NFkB and MAP Kinases Upon TLR7 8 or 9 Activation	21/102	20.59	0.00244712	0.0440667	2.1695	13.045	MAP2K3;LRRC14;JUN;NLRX1;PELI3;NLRC5;LY96;TRAF2;VRK3;ECSIT;NFKB2;NFKBIA;MAPK11;IRAK1;TNIP2;RPS6KA1;TAB1;IKBKG;MAP2K7;NFKBIB;MAPK3
Death Receptor Signaling	29/157	18.47	0.00246083	0.0440667	1.898	11.4021	RNF31;SPPL2B;ARHGEF10L;SHARPIN;IRAK1;ARHGDIA;IKBKG;ARHGEF40;IKBKE;PSENEN;NGFR;BAD;ARHGEF16;ARHGEF19;MIB2;ARHGEF18;TRAF2;TRAF1;TNFRSF1A;TIAM2;NFKBIA;MAG;ULK1;ARHGEF1;STUB1;RBCK1;TAB1;SQSTM1;BIRC3
NoRC Negatively Regulates rRNA Expression	17/76	22.37	0.00245713	0.0440667	2.4096	14.4788	H2BC9;H2AC6;H2BC5;H2BC17;H2BC12;H2BC13;H2AC14;H2BC15;SIN3B;TAF1C;H2BC21;H2BC11;ERCC2;POLR2E;POLR2F;H4C1;POLR2L
Pre-NOTCH Expression and Processing	19/89	21.35	0.00250177	0.0443426	2.2706	13.6028	H2BC9;JUN;NOTCH1;H2AC6;H2BC5;SIRT6;FURIN;RFNG;H2BC17;LFNG;H2BC12;H2BC13;MOV10;H2AC14;H2BC15;H2BC21;H2BC11;H4C1;ST3GAL3
Microtubule-dependent Trafficking of Connexons From Golgi to the Plasma Membrane	7/19	36.84	0.002537	0.0445128	4.8683	29.0967	TUBA1C;TUBB2B;TUBB6;TUBB2A;TUBB3;TUBB4B;TUBA4A
NIK-->noncanonical NF-kB Signaling	12/46	26.09	0.00269486	0.0468097	2.9488	17.4462	PSMB6;PSMD8;PSMB5;PSMC3;PSMC4;PSMD3;ADRM1;MAP3K14;PSMA7;RELB;NFKB2;UBE2M
MyD88 Dependent Cascade Initiated on Endosome	21/103	20.39	0.00276972	0.0476338	2.1429	12.6198	MAP2K3;LRRC14;JUN;NLRX1;PELI3;NLRC5;LY96;TRAF2;VRK3;ECSIT;NFKB2;NFKBIA;MAPK11;IRAK1;TNIP2;RPS6KA1;TAB1;IKBKG;MAP2K7;NFKBIB;MAPK3
TRIF (TICAM1)-mediated TLR4 Signaling	22/110	20	0.00286356	0.0482913	2.0922	12.2513	MAP2K3;LRRC14;JUN;NLRX1;NLRC5;LY96;TRAF2;VRK3;NFKB2;NFKBIA;MAPK11;IRAK1;IRF3;TNIP2;RPS6KA1;TAB1;IKBKG;MAP2K7;IKBKE;NFKBIB;BIRC3;MAPK3
MyD88-independent TLR4 Cascade	22/110	20	0.00286356	0.0482913	2.0922	12.2513	MAP2K3;LRRC14;JUN;NLRX1;NLRC5;LY96;TRAF2;VRK3;NFKB2;NFKBIA;MAPK11;IRAK1;IRF3;TNIP2;RPS6KA1;TAB1;IKBKG;MAP2K7;IKBKE;NFKBIB;BIRC3;MAPK3
Pentose Phosphate Pathway	6/15	40	0.00321019	0.0492748	5.5621	31.9344	G6PD;TALDO1;PGLS;PGD;TKT;RBKS
Synthesis of Prostaglandins (PG) and Thromboxanes (TX)	6/15	40	0.00321019	0.0492748	5.5621	31.9344	CBR1;PTGES2;TBXAS1;AKR1C3;PTGS1;PTGES
Platelet Activation, Signaling and Aggregation	43/262	16.41	0.00306717	0.0492748	1.6474	9.5333	LGALS3BP;ECM1;DGKD;TEX264;SHC1;SRC;SERPINE1;PDGFA;CLU;GNAI2;GNA11;PSAP;RAC2;AKT1;FLNA;QSOX1;CSK;TIMP1;AAMP;MAPK3;CHID1;SRGN;VWF;PRKCB;EGF;ACTN1;RHOG;ACTN4;GTPBP2;ADRA2C;TUBA4A;RHOB;VEGFA;DGKQ;GNB2;TAGLN2;ALDOA;GAS6;DAGLB;F2RL2;LAT;BCAR1;FERMT3
Signaling by Nuclear Receptors	44/270	16.3	0.00317061	0.0492748	1.6336	9.3995	SHC1;SRC;SRF;GPS2;GNAI2;CYP26B1;H2AC14;RXRA;AKT2;H2BC21;POLR2E;AKT1;POLR2F;H4C1;POLR2I;CTSD;PLTP;POLR2J;MAPK3;POLR2L;H2BC9;JUN;KDM4B;H2BC5;H2AC6;PRMT1;EGF;SPHK1;NR1H2;AKR1C3;AXIN1;GTF2F1;H2BC17;MMP9;USF2;H2BC12;CYP26A1;MOV10;H2BC13;EEPD1;H2BC15;GNB2;H2BC11;RARA
Defective Pyroptosis	11/41	26.83	0.00315582	0.0492748	3.0627	17.6367	H2BC9;H2BC12;H2BC13;H2AC14;H2BC15;H2AC6;H2BC5;H2BC21;H2BC11;H4C1;H2BC17
Intraflagellar Transport	13/53	24.53	0.00329066	0.0492748	2.7157	15.5248	DYNC2I2;IFT140;TUBB4B;KIF17;TUBA4A;TUBA1C;TUBB6;TUBB2B;TUBB2A;TUBB3;IFT27;KIF3C;DYNLRB1
Deposition of New CENPA-containing Nucleosomes at the Centromere	13/53	24.53	0.00329066	0.0492748	2.7157	15.5248	CENPT;H2BC9;H2AC6;H2BC5;H2BC17;H2BC12;H2BC13;H2AC14;H2BC15;H2BC21;H2BC11;CENPM;H4C1
PRC2 Methylates Histones and DNA	11/41	26.83	0.00315582	0.0492748	3.0627	17.6367	H2BC9;H2BC12;H2BC13;H2AC14;H2BC15;H2AC6;H2BC5;H2BC21;H2BC11;H4C1;H2BC17
Nucleosome Assembly	13/53	24.53	0.00329066	0.0492748	2.7157	15.5248	CENPT;H2BC9;H2AC6;H2BC5;H2BC17;H2BC12;H2BC13;H2AC14;H2BC15;H2BC21;H2BC11;CENPM;H4C1
TNF Signaling	14/59	23.73	0.00323866	0.0492748	2.6001	14.9055	RNF31;SPPL2B;MIB2;TRAF2;TRAF1;TNFRSF1A;SHARPIN;ULK1;STUB1;IKBKG;RBCK1;TAB1;IKBKE;BIRC3
Meiotic Synapsis	14/59	23.73	0.00323866	0.0492748	2.6001	14.9055	H2BC9;SUN2;ACD;H2AC6;H2BC5;H2BC17;H2BC12;H2BC13;H2AC14;H2BC15;H2BC21;H2BC11;LMNA;H4C1
The Role of GTSE1 in G2 M Progression After G2 Checkpoint	15/65	23.08	0.00313676	0.0492748	2.5077	14.4561	ADRM1;TUBB4B;TUBA4A;PSMA7;PSMD8;PSMB6;TUBA1C;TUBB6;TUBB2B;TUBB2A;PSMB5;PSMC3;TUBB3;PSMC4;PSMD3
Diseases of Programmed Cell Death	17/78	21.79	0.00328116	0.0492748	2.3303	13.3286	H2BC9;JUN;H2AC6;H2BC5;TRAF2;H2BC17;H2BC12;H2BC13;PRDX2;H2AC14;H2BC15;CAPNS1;H2BC21;H2BC11;LMNA;CAPN1;H4C1
Toll Like Receptor 5 (TLR5) Cascade	20/98	20.41	0.0034073	0.0497352	2.145	12.1877	MAP2K3;LRRC14;JUN;NLRX1;PELI3;NLRC5;TRAF2;VRK3;ECSIT;NFKB2;NFKBIA;MAPK11;IRAK1;TNIP2;RPS6KA1;TAB1;IKBKG;MAP2K7;NFKBIB;MAPK3
Toll Like Receptor 10 (TLR10) Cascade	20/98	20.41	0.0034073	0.0497352	2.145	12.1877	MAP2K3;LRRC14;JUN;NLRX1;PELI3;NLRC5;TRAF2;VRK3;ECSIT;NFKB2;NFKBIA;MAPK11;IRAK1;TNIP2;RPS6KA1;TAB1;IKBKG;MAP2K7;NFKBIB;MAPK3
MyD88 Cascade Initiated on Plasma Membrane	20/98	20.41	0.0034073	0.0497352	2.145	12.1877	MAP2K3;LRRC14;JUN;NLRX1;PELI3;NLRC5;TRAF2;VRK3;ECSIT;NFKB2;NFKBIA;MAPK11;IRAK1;TNIP2;RPS6KA1;TAB1;IKBKG;MAP2K7;NFKBIB;MAPK3
Transport of Connexons to the Plasma Membrane	7/20	35	0.0035456	0.0513225	4.4936	25.3529	TUBA1C;TUBB2B;TUBB6;TUBB2A;TUBB3;TUBB4B;TUBA4A
Detoxification of Reactive Oxygen Species	10/36	27.78	0.00365072	0.0524075	3.2119	18.0276	PRDX2;CCS;GPX1;TXNRD2;GSTP1;TXNRD1;GSR;CYBA;TXN;ATOX1
Interleukin-1 Family Signaling	26/140	18.57	0.00370496	0.0527501	1.9095	10.6894	LRRC14;NLRX1;PELI3;NLRC5;PSMA7;PSMD8;PSMB6;PSMB5;IRAK1;PSMD3;IKBKG;IL1R1;ADRM1;TRAF2;NFKB2;SIGIRR;NFKBIA;IL1A;PSMC3;PSMC4;TNIP2;IL1B;IL1RAPL1;TAB1;SQSTM1;NFKBIB
Toll Like Receptor 3 (TLR3) Cascade	21/106	19.81	0.00395918	0.0559113	2.067	11.4339	MAP2K3;LRRC14;JUN;NLRX1;NLRC5;TRAF2;VRK3;NFKB2;NFKBIA;MAPK11;IRAK1;IRF3;TNIP2;RPS6KA1;TAB1;IKBKG;MAP2K7;IKBKE;NFKBIB;BIRC3;MAPK3
Sealing of the Nuclear Envelope (NE) by ESCRT-III	9/31	29.03	0.00414781	0.0581027	3.4154	18.7341	TUBA1C;TUBB6;TUBB2B;TUBB2A;TUBB3;TUBB4B;CHMP6;LEMD2;TUBA4A
Amyloid Fiber Formation	17/80	21.25	0.00432149	0.0600514	2.2561	12.2827	PSENEN;H2BC9;H2AC6;H2BC5;FURIN;H2BC17;HSPG2;H2BC12;CST3;H2BC13;GGA1;H2AC14;H2BC15;H2BC21;H2BC11;H4C1;MFGE8
Toll Like Receptor 7 8 (TLR7 8) Cascade	21/107	19.63	0.00443961	0.0612032	2.0428	11.0663	MAP2K3;LRRC14;JUN;NLRX1;PELI3;NLRC5;LY96;TRAF2;VRK3;ECSIT;NFKB2;NFKBIA;MAPK11;IRAK1;TNIP2;RPS6KA1;TAB1;IKBKG;MAP2K7;NFKBIB;MAPK3
Gluconeogenesis	8/26	30.77	0.00458255	0.0621867	3.7097	19.9784	TPI1;G6PC3;PC;ENO1;ENO2;ALDOA;ENO3;GAPDH
TNFR1-induced Proapoptotic Signaling	8/26	30.77	0.00458255	0.0621867	3.7097	19.9784	RNF31;SHARPIN;MIB2;TRAF2;RBCK1;IKBKE;TNFRSF1A;BIRC3
Oxidative Stress Induced Senescence	19/94	20.21	0.00474113	0.0633488	2.1187	11.338	MAP2K3;H2BC9;JUN;PHC2;H2AC6;H2BC5;TXN;H2BC17;H2BC12;H2BC13;MAPK11;MOV10;H2AC14;H2BC15;H2BC21;H2BC11;H4C1;MAP2K7;MAPK3
Dectin-1 Mediated Noncanonical NF-kB Signaling	12/49	24.49	0.00472382	0.0633488	2.7092	14.5084	PSMD8;PSMB6;PSMB5;PSMC3;PSMC4;PSMD3;ADRM1;MAP3K14;PSMA7;RELB;NFKB2;UBE2M
Macroautophagy	26/143	18.18	0.00496152	0.0650988	1.8602	9.8703	TOMM40;SRC;WDR45;RPTOR;TUBA1C;TUBB6;TUBB3;ATG101;HSF1;MLST8;GABARAPL1;ATG9A;TSC2;TUBB4B;TUBA4A;TUBB2B;PINK1;TUBB2A;ATG4B;PLIN3;ULK1;LAMTOR2;CHMP6;LAMTOR4;SQSTM1;ATG4D
Toll Like Receptor TLR6 TLR2 Cascade	22/115	19.13	0.00502202	0.0650988	1.9792	10.4775	MAP2K3;LRRC14;JUN;NLRX1;PELI3;NLRC5;LY96;TRAF2;VRK3;ECSIT;NFKB2;SIGIRR;NFKBIA;MAPK11;IRAK1;TNIP2;RPS6KA1;TAB1;IKBKG;MAP2K7;NFKBIB;MAPK3
MyD88 MAL(TIRAP) Cascade Initiated on Plasma Membrane	22/115	19.13	0.00502202	0.0650988	1.9792	10.4775	MAP2K3;LRRC14;JUN;NLRX1;PELI3;NLRC5;LY96;TRAF2;VRK3;ECSIT;NFKB2;SIGIRR;NFKBIA;MAPK11;IRAK1;TNIP2;RPS6KA1;TAB1;IKBKG;MAP2K7;NFKBIB;MAPK3
HATs Acetylate Histones	21/108	19.44	0.0049674	0.0650988	2.0192	10.7117	H2BC9;H2AC6;H2BC5;MCRS1;SGF29;H2BC17;H2BC18;H2AC11;H2BC12;H2AC12;H2BC13;TAF6L;H2AC14;H2BC15;RUVBL2;H2BC21;H2AC21;TADA3;H2BC11;H4C1;DMAP1
Autophagy	28/158	17.72	0.00526975	0.0673056	1.8034	9.46	TOMM40;SRC;WDR45;RPTOR;TUBA1C;TUBB6;TUBB3;ATG101;HSF1;MLST8;MVB12A;GABARAPL1;ATG9A;TSC2;TUBB4B;TUBA4A;TUBB2B;PINK1;TUBB2A;ATG4B;PLIN3;ULK1;LAMTOR2;CHMP6;LAMTOR4;SQSTM1;VPS28;ATG4D
Cytokine Signaling in Immune System	106/776	13.66	0.00523146	0.0673056	1.3334	7.0045	CSF1;IFI35;IFI30;PSMD8;MT2A;TUBB6;TUBB3;AKT2;PSMD3;RPS6KA1;PIM1;AKT1;TNFRSF8;IL13RA2;JUNB;FAAP100;MAP2K3;IL1R1;AIP;TALDO1;VRK3;TUBA4A;SIGIRR;FSCN1;SQSTM1;STX1A;NLRX1;SHC1;CNN2;IRAK1;HMOX1;MAP2K7;JUN;LIF;NFKB2;SMAD7;BST2;ISG20;NFKBIA;PIN1;TNFSF9;TAB1;MAP3K14;UBE2M;NFKBIB;CD40;CXCL8;CXCL2;TUBA1C;TRIM3;ITGAX;ELOB;IKBKG;TIMP1;IL11;SEC13;SERPINB2;TNFRSF12A;SPHK1;GAB3;TRAF2;TYK2;MMP9;IL17RC;TNFRSF1A;IL…
SUMOylation of Immune Response Proteins	5/12	41.67	0.00585376	0.0742189	5.9573	30.6244	NFKBIA;PIAS4;IKBKG;IKBKE;NFKB2
Toll Like Receptor 9 (TLR9) Cascade	21/110	19.09	0.00617891	0.0777737	1.9736	10.0391	MAP2K3;LRRC14;JUN;NLRX1;PELI3;NLRC5;LY96;TRAF2;VRK3;ECSIT;NFKB2;NFKBIA;MAPK11;IRAK1;TNIP2;RPS6KA1;TAB1;IKBKG;MAP2K7;NFKBIB;MAPK3
RUNX2 Regulates Genes Involved in Cell Migration	4/8	50	0.00647124	0.0792054	8.3377	42.0252	MMP13;AKT2;AKT1;ITGA5
Insertion of Tail-Anchored Proteins Into the Endoplasmic Reticulum Membrane	7/22	31.82	0.00644085	0.0792054	3.894	19.6455	UBL4A;PRNP;SGTA;HMOX1;GET3;STX1A;GET4
HIV Infection	37/227	16.3	0.00638729	0.0792054	1.6319	8.2467	CTDP1;ELL;CXCR4;AP2A1;FURIN;AP2A2;PSMA7;PSMD8;PSMB6;PSMB5;PSMD3;MVB12A;POLR2E;AP1S1;POLR2F;ELOB;NELFB;NELFA;POLR2I;POLR2J;AP1M2;AP1M1;POLR2L;SEC13;APOBEC3G;LIG1;ADRM1;AP1B1;HMGA1;GTF2F1;RANGAP1;PSMC3;PSMC4;ERCC2;TAF6;CHMP6;VPS28
TNFR1-induced NF-kappa-B Signaling Pathway	9/33	27.27	0.00652065	0.0792054	3.1304	15.7548	RNF31;SHARPIN;TRAF2;IKBKG;TRAF1;RBCK1;TAB1;TNFRSF1A;BIRC3
Activation of Matrix Metalloproteinases	9/33	27.27	0.00652065	0.0792054	3.1304	15.7548	COL18A1;MMP24;MMP13;MMP15;SPOCK3;MMP17;FURIN;TIMP1;MMP9
TNF Receptor Superfamily (TNFSF) Members Mediating Non-Canonical NF-kB Pathway	6/17	35.29	0.00657699	0.0793349	4.5503	22.8615	CD40;TNFRSF12A;TRAF2;LTBR;MAP3K14;BIRC3
Protein Folding	19/97	19.59	0.00674037	0.080745	2.0368	10.1834	FBXW4;FBXW5;SPHK1;USP11;FBXW9;ARL2;TBCB;TUBB4B;TUBA4A;TUBA1C;TUBB6;TUBB2B;TUBB2A;TUBB3;GNB2;GNA11;FBXO6;KIFC3;WRAP53
Toll Like Receptor 2 (TLR2) Cascade	22/118	18.64	0.00686728	0.081146	1.917	9.5485	MAP2K3;LRRC14;JUN;NLRX1;PELI3;NLRC5;LY96;TRAF2;VRK3;ECSIT;NFKB2;SIGIRR;NFKBIA;MAPK11;IRAK1;TNIP2;RPS6KA1;TAB1;IKBKG;MAP2K7;NFKBIB;MAPK3
Toll Like Receptor TLR1 TLR2 Cascade	22/118	18.64	0.00686728	0.081146	1.917	9.5485	MAP2K3;LRRC14;JUN;NLRX1;PELI3;NLRC5;LY96;TRAF2;VRK3;ECSIT;NFKB2;SIGIRR;NFKBIA;MAPK11;IRAK1;TNIP2;RPS6KA1;TAB1;IKBKG;MAP2K7;NFKBIB;MAPK3
Collagen Degradation	14/64	21.88	0.00701311	0.0817568	2.3395	11.6037	COL18A1;COL16A1;FURIN;MMP9;MMP12;MMP13;COL4A2;CTSL;MMP15;COL6A2;COL5A3;COL6A1;COL9A3;CTSD
Synthesis of Substrates in N-glycan Biosythesis	14/64	21.88	0.00701311	0.0817568	2.3395	11.6037	PMM1;ST8SIA2;RENBP;GMPPB;DPM2;DPM3;AMDHD2;DOLPP1;GMPPA;MVD;NUDT14;ST6GALNAC4;ST6GALNAC6;ST3GAL3
Response to Elevated Platelet Cytosolic Ca2+	24/133	18.05	0.00743254	0.0860688	1.8422	9.0304	CHID1;LGALS3BP;SRGN;ECM1;VWF;PRKCB;TEX264;EGF;ACTN1;SERPINE1;PDGFA;ACTN4;GTPBP2;CLU;TUBA4A;VEGFA;PSAP;FLNA;TAGLN2;QSOX1;TIMP1;ALDOA;GAS6;FERMT3
Toll Like Receptor 4 (TLR4) Cascade	26/148	17.57	0.00783672	0.0901482	1.7835	8.6479	LRRC14;NLRX1;PELI3;NLRC5;LY96;ECSIT;IRAK1;RPS6KA1;IKBKG;MAP2K7;IKBKE;MAPK3;MAP2K3;JUN;TRAF2;VRK3;DNM1;NFKB2;SIGIRR;NFKBIA;MAPK11;IRF3;TNIP2;TAB1;NFKBIB;BIRC3
Interleukin-10 Signaling	11/46	23.91	0.00808931	0.0914205	2.6244	12.6425	IL1A;CXCL8;CSF1;CCL20;IL1R1;IL1B;LIF;TIMP1;TYK2;CXCL2;TNFRSF1A
RUNX1 Regulates Genes Involved in Megakaryocyte Differentiation and Platelet Function	14/65	21.54	0.00807721	0.0914205	2.2935	11.0515	H2BC9;H2AC6;H2BC5;PRMT1;H2BC17;H2BC12;H2BC13;MOV10;H2AC14;H2BC15;SIN3B;H2BC21;H2BC11;H4C1
Signaling by NTRKs	24/134	17.91	0.00815784	0.0914205	1.8254	8.7779	MAP2K2;PTPRS;SHC1;BDNF;SRC;SRF;AP2A1;FURIN;VRK3;AP2A2;DNM1;MAPK12;FOSL1;MAPK11;VGF;RPS6KA1;ID1;ID3;BAX;NELFB;JUNB;RALGDS;DNAL4;MAPK3
Signaling by Rho GTPases, Miro GTPases and RHOBTB3	94/688	13.66	0.00814778	0.0914205	1.3318	6.406	RTKN;ARHGEF10L;TUBA1C;SYDE1;TUBB6;BAIAP2L2;H2AC14;TUBB3;ARHGDIA;H2BC21;EFHD2;RAC2;WDR6;RAC3;H4C1;ARHGEF40;GIT1;PLEKHG3;PLEKHG4;SEC13;H2AC6;PRKCB;ACTN1;ARHGEF16;RHOG;ARHGEF19;ARHGEF18;CYBA;ARAP1;RANGAP1;RHOC;H2BC17;LRRC41;TUBA4A;RHOB;BCR;TIAM2;H2BC12;H2BC13;MYL6;TUBB2B;TUBB2A;H2BC15;HGS;CDC37;H2BC11;CDC42EP2;CDC42EP1;PLIN3;MYH9;ARHGEF1;TAX1BP3;MAD1L1;DBN1;EPHA2;PKN3;SRC;GPS1;SRF;SLC1A5;LIN7B;PMF1;…
Hedgehog 'Off' State	19/99	19.19	0.00841909	0.0931462	1.9857	9.4861	IFT140;ADRM1;KIF7;TUBB4B;ADCY7;TUBA4A;PSMA7;PSMD8;PSMB6;TUBA1C;TUBB6;TUBB2B;TUBB2A;PSMB5;PRKAR1B;PSMC3;TUBB3;PSMC4;PSMD3
L1CAM Interactions	22/120	18.33	0.00838125	0.0931462	1.8777	8.9785	LYPLA2;MAP2K2;SRC;AP2A1;L1CAM;TUBB4B;AP2A2;TUBA4A;DNM1;RPS6KA4;SPTA1;TUBA1C;TUBB6;GAP43;TUBB2B;TUBB2A;TUBB3;RPS6KA1;KCNQ3;ITGA5;SCN2A;MAPK3
Biosynthesis of the N-glycan Precursor (Dolichol LLO) and Transfer to a Nascent Protein	16/79	20.25	0.00891456	0.0980038	2.1224	10.0179	PMM1;ST8SIA2;ALG12;RENBP;GMPPB;DPM2;DPM3;AMDHD2;DOLPP1;GMPPA;MVD;NUDT14;ST6GALNAC4;ST6GALNAC6;MPDU1;ST3GAL3
Platelet Degranulation	23/128	17.97	0.0091018	0.0992759	1.8323	8.6104	CHID1;LGALS3BP;SRGN;ECM1;VWF;TEX264;EGF;ACTN1;SERPINE1;PDGFA;ACTN4;GTPBP2;CLU;TUBA4A;VEGFA;PSAP;FLNA;TAGLN2;QSOX1;TIMP1;ALDOA;GAS6;FERMT3
mRNA Splicing - Minor Pathway	12/53	22.64	0.00914458	0.0992759	2.4444	11.4754	SF3B5;RNU12;PRPF6;SNRPD2;ZMAT5;POLR2E;POLR2F;GTF2F1;POLR2I;POLR2J;SNRPB;POLR2L
Activation of NMDA Receptors and Postsynaptic Events	18/93	19.35	0.00930666	0.100122	2.0062	9.3831	SRC;NRG1;TUBB4B;KIF17;LIN7B;TUBA4A;CAMKK1;PPM1F;TUBA1C;TUBB6;TUBB2B;TUBB2A;PRKAR1B;TUBB3;RPS6KA1;CAMK2G;GIT1;MAPK3
Post-translational Protein Modification	184/1457	12.63	0.00933783	0.100122	1.2222	5.7123	CSF1;FBXO27;KEAP1;RPL8;PSMD8;H2AC11;H2AC12;POFUT2;TUBB6;LGALS1;H2AC14;TRIM28;TUBB3;PSMD3;FBXO6;H4C1;NUDT14;FBXW4;PIAS4;ARSA;JMJD4;FBXW5;USP5;H2AC6;FBXW9;SHISA5;MOGS;ALG12;JMJD7;TUBA4A;RNF40;DPM2;DPM3;CDC34;RAB36;HGS;FKBP8;PREB;TTLL12;SQSTM1;OBSL1;INO80E;CUL7;LYPD1;DPP3;SPTA1;ADAMTS15;ARSL;AMDHD2;STC2;RCE1;ST3GAL3;MPDU1;PHC2;PMM1;KLHL25;WFS1;ST8SIA2;TRAPPC5;KLHL21;KLHL22;BTBD6;NFKB2;SMAD7;NFKBIA;N…
Pre-NOTCH Transcription and Translation	15/73	20.55	0.00973348	0.103724	2.1609	10.0096	H2BC9;JUN;NOTCH1;H2AC6;H2BC5;SIRT6;H2BC17;H2BC12;H2BC13;MOV10;H2AC14;H2BC15;H2BC21;H2BC11;H4C1
Lysosome Vesicle Biogenesis	9/35	25.71	0.00981633	0.103969	2.8893	13.3593	BLOC1S1;DNAJC6;HGS;CLTB;AP1B1;AP1S1;AP1M2;AP1M1;TXNDC5
Activation of NF-kappaB in B Cells	12/54	22.22	0.0106383	0.110651	2.386	10.8405	PSMD8;PSMB6;NFKBIA;PSMB5;PSMC3;PRKCB;PSMC4;PSMD3;ADRM1;IKBKG;PSMA7;NFKBIB
Autodegradation of Cdh1 by Cdh1 APC C	12/54	22.22	0.0106383	0.110651	2.386	10.8405	PSMD8;PSMB6;FZR1;PSMB5;PSMC3;PSMC4;UBE2S;PSMD3;ADRM1;PSMA7;ANAPC2;ANAPC11
Collagen Biosynthesis and Modifying Enzymes	14/67	20.9	0.0105863	0.110651	2.2067	10.0364	COL18A1;COL16A1;COL27A1;PCOLCE2;COL24A1;PLOD3;PLOD1;P3H3;BMP1;COL4A2;COL6A2;COL5A3;COL6A1;COL9A3
Sema4D in Semaphorin Signaling	7/24	29.17	0.0108022	0.111687	3.4355	15.5559	MYL6;RRAS;LIMK1;MYH14;MYH9;RHOC;RHOB
DNA Double-Strand Break Repair	26/152	17.11	0.0110177	0.113241	1.7265	7.7833	MUS81;UBXN1;BABAM1;POLD4;PPP4C;EME2;H2BC21;POLD1;POLL;H4C1;APBB1;PIAS4;H2BC9;KDM4B;H2BC5;POLM;XRCC3;SIRT6;H2BC17;H2BC12;H2BC13;H2BC15;ERCC1;H2BC11;BAP1;RAD9A
Metabolism of Carbohydrates	44/290	15.17	0.0114365	0.116215	1.4991	6.7023	PYGB;PFKFB4;CHPF;GBE1;XYLT2;SLC2A1;ENO1;ENO2;ENO3;HS6ST1;SGSH;HYAL2;GPC1;MAN2C1;PGLS;ST3GAL3;SEC13;G6PD;TPI1;CHPF2;B3GAT3;GAA;GLYCTK;DCXR;TALDO1;PGD;HSPG2;GALE;PFKL;G6PC3;PKM;PC;PGP;CHST1;MAN2B1;ALDOA;TKT;AGRN;B4GALT7;GAPDH;RBKS;PFKP;GALK1;ST6GALNAC6
Signaling by Rho GTPases	91/672	13.54	0.0114408	0.116215	1.3172	5.8887	RTKN;ARHGEF10L;TUBA1C;SYDE1;TUBB6;BAIAP2L2;H2AC14;TUBB3;ARHGDIA;H2BC21;EFHD2;RAC2;WDR6;RAC3;H4C1;ARHGEF40;GIT1;PLEKHG3;PLEKHG4;SEC13;H2AC6;PRKCB;ACTN1;ARHGEF16;RHOG;ARHGEF19;ARHGEF18;CYBA;ARAP1;RANGAP1;RHOC;H2BC17;TUBA4A;RHOB;BCR;TIAM2;H2BC12;H2BC13;MYL6;TUBB2B;TUBB2A;H2BC15;HGS;CDC37;H2BC11;CDC42EP2;CDC42EP1;MYH9;ARHGEF1;TAX1BP3;MAD1L1;DBN1;EPHA2;PKN3;SRC;GPS1;SRF;SLC1A5;LIN7B;PMF1;NCKIPSD;KLC4;…
Vif-mediated Degradation of APOBEC3G	10/42	23.81	0.0116772	0.117926	2.6088	11.6093	PSMB6;PSMD8;PSMB5;APOBEC3G;PSMC3;PSMC4;PSMD3;ADRM1;ELOB;PSMA7
Signaling by FGFR2 IIIa TM	6/19	31.58	0.0119586	0.11938	3.8498	17.0405	POLR2E;POLR2F;GTF2F1;POLR2I;POLR2J;POLR2L
RHO GTPases Activate ROCKs	6/19	31.58	0.0119586	0.11938	3.8498	17.0405	MYL6;LIMK1;MYH14;MYH9;RHOC;RHOB
Amino Acids Regulate mTORC1	12/55	21.82	0.0123135	0.121672	2.3304	10.247	RPTOR;ATP6V0B;SEC13;NPRL3;MLST8;LAMTOR2;TCIRG1;KPTN;LAMTOR4;ATP6V0C;WDR24;ATP6V1F
AKT Phosphorylates Targets in the Cytosol	5/14	35.71	0.0123283	0.121672	4.6329	20.3656	BAD;AKT2;AKT1S1;TSC2;AKT1
Cellular Response to Starvation	27/161	16.77	0.0125252	0.122917	1.6859	7.3841	CEBPB;RPLP1;NPRL3;TCIRG1;RPL8;WDR24;RPS15;RPTOR;RPL18A;RPS19;RPL36;MLST8;RPL35;RPLP2;RPL18;RPS10;ATP6V1F;ATP6V0B;SEC13;RPS5;RPS28;TRIB3;LAMTOR2;FAU;KPTN;LAMTOR4;ATP6V0C
Membrane Trafficking	86/633	13.59	0.0126171	0.123123	1.3216	5.779	GDI1;CLTB;AP2A1;AP2A2;SLC2A8;TUBA1C;TUBB6;TUBB3;PPP6R1;AKT2;FTH1;AKT1;AP1S1;KIF21B;SBF1;TBC1D10A;SH3GL1;SEC13;SGIP1;AP1B1;TSC2;KIF22;TUBA4A;ARFGAP1;DNM1;EPN1;GAK;TUBB2B;TRAPPC6A;GJD3;TUBB2A;RAB36;BIN1;DNAJC6;HGS;PLIN3;MYH9;PREB;ULK1;DENND6B;NAA38;RIN1;CHMP6;PAFAH1B3;VPS28;ARF5;FTL;NAPA;SRC;GPS1;RAB1B;DENND3;PLA2G6;STX10;SPTA1;ARFRP1;GGA1;KLC4;CYTH2;KLC2;GRK2;VPS51;BLOC1S1;LMAN2;MVB12A;PACSIN3;PIP…
XBP1(S) Activates Chaperone Genes	11/49	22.45	0.013115	0.126559	2.4168	10.4746	ZBTB17;ACADVL;CUL7;SHC1;WFS1;DDX11;LMNA;CXXC1;PREB;ARFGAP1;YIF1A
TP53 Regulates Transcription of DNA Repair Genes	13/62	20.97	0.0131101	0.126559	2.2158	9.604	JUN;CTDP1;ELL;GTF2F1;ERCC2;POLR2E;POLR2F;ELOB;NELFB;NELFA;POLR2I;POLR2J;POLR2L
Formation of Tubulin Folding Intermediates by CCT TriC	7/25	28	0.0136433	0.13093	3.2444	13.9333	TUBA1C;TUBB6;TUBB2B;TUBB2A;TUBB3;TUBB4B;TUBA4A
Assembly and Cell Surface Presentation of NMDA Receptors	10/43	23.26	0.0137903	0.131614	2.5296	10.8361	TUBA1C;TUBB6;TUBB2B;TUBB2A;TUBB3;TUBB4B;KIF17;LIN7B;CAMK2G;TUBA4A
Golgi Associated Vesicle Biogenesis	12/56	21.43	0.0141836	0.134346	2.2773	9.6916	GAK;NAPA;DNAJC6;BLOC1S1;FTH1;AP1B1;HIP1R;AP1S1;AP1M2;FTL;AP1M1;TXNDC5
Cross-presentation of Soluble Exogenous Antigens (Endosomes)	9/37	24.32	0.0142312	0.134346	2.6826	11.4074	MRC2;PSMB6;PSMD8;PSMB5;PSMC3;PSMC4;PSMD3;ADRM1;PSMA7
MHC Class II Antigen Presentation	22/126	17.46	0.0146096	0.137173	1.7687	7.4748	SEC13;AP1B1;AP2A1;KIF22;IFI30;TUBB4B;AP2A2;TUBA4A;DNM1;KLC4;TUBA1C;TUBB6;TUBB2B;KLC2;TUBB2A;TUBB3;CTSL;AP1S1;KIF3C;CTSD;AP1M2;AP1M1
Sema4D Induced Cell Migration and Growth-Cone Collapse	6/20	30	0.0155642	0.144923	3.5746	14.8804	MYL6;LIMK1;MYH14;MYH9;RHOC;RHOB
Protein Localization	27/164	16.46	0.0157652	0.144923	1.6487	6.8419	TOMM40;COX17;TIMM13;CHCHD5;HMOX1;TIMM17B;CYC1;GET3;ABCD1;GET4;PEX16;UBL4A;FIS1;PRNP;ACOT8;MTX1;IDH3G;ECH1;SGTA;TYSND1;GFER;PEX14;PEX6;ACO2;ACOX3;CRAT;STX1A
Diseases of Metabolism	40/264	15.15	0.0156366	0.144923	1.4957	6.2192	NOTCH1;GBE1;POMT1;CYP19A1;SGSH;LFNG;ADAMTS4;ADAMTS15;CYP26B1;GPC1;FDXR;GGT1;ST3GAL3;MPDU1;BCKDHA;B3GAT3;GAA;DCXR;TALDO1;MOGS;ALG12;MUC5B;HSPG2;APRT;CYP27A1;BCKDK;DPM2;DPM3;GALE;G6PC3;PC;TCN2;TBXAS1;FDX2;AGRN;GCLM;B4GALT7;ADA;CD320;GALK1
Programmed Cell Death	32/202	15.84	0.0157688	0.144923	1.5755	6.5377	LY96;PSMA7;BBC3;PSMD8;PSMB6;PSMB5;AKT2;PSMD3;LMNA;AKT1;PMAIP1;MAPK3;DBNL;BAD;DAPK2;DAPK3;ADRM1;TRAF2;H1-2;H1-5;H1-4;IL1A;PSMC3;PSMC4;CDC37;IL1B;IRF1;BAX;STUB1;CHMP6;BIRC3;PLEC
Chaperonin-mediated Protein Folding	17/91	18.68	0.0158628	0.145019	1.9196	7.9542	FBXW4;FBXW5;SPHK1;USP11;FBXW9;TUBB4B;TUBA4A;TUBA1C;TUBB6;TUBB2B;TUBB2A;TUBB3;GNA11;GNB2;FBXO6;KIFC3;WRAP53
Degradation of DVL	10/44	22.73	0.016177	0.147117	2.455	10.1249	PSMB6;PSMD8;PSMB5;PSMC3;PSMC4;DVL1;PSMD3;ADRM1;HECW1;PSMA7
AKT Phosphorylates Targets in the Nucleus	4/10	40	0.0162851	0.14733	5.5578	22.8844	NR4A1;AKT2;RPS6KB2;AKT1
Regulation of Ornithine Decarboxylase (ODC)	9/38	23.68	0.0169197	0.150637	2.59	10.5653	PSMB6;PSMD8;PSMB5;PSMC3;PSMC4;PSMD3;ADRM1;OAZ1;PSMA7
MicroRNA (miRNA) Biogenesis	7/26	26.92	0.0169814	0.150637	3.0735	12.5265	POLR2E;DGCR8;POLR2F;POLR2I;POLR2J;TARBP2;POLR2L
Intracellular Signaling by Second Messengers	47/321	14.64	0.0169977	0.150637	1.4374	5.857	PRR5;HDAC5;SRC;PDGFA;ADCY7;CAMKK1;PSMA7;HDAC7;PSMD8;RPTOR;PSMB6;PSMB5;GRK2;IRAK1;AKT2;PSMD3;RAC2;MLST8;AKT1;PIP5K1C;MAF1;CAMK2G;MAPK3;MBD3;PDGFRB;JUN;PHC2;BDNF;BAD;EGF;ADRM1;RHOG;TSC2;NRG1;MOV10;NR4A1;PRKAR1B;PSMC3;PSMC4;AKT1S1;RPS6KB2;TRIB3;LAMTOR2;STUB1;LAMTOR4;FGFR4;FGFR3
PIP3 Activates AKT Signaling	42/281	14.95	0.0167782	0.150637	1.472	6.0172	PRR5;HDAC5;SRC;PDGFA;PSMA7;HDAC7;PSMD8;RPTOR;PSMB6;PSMB5;IRAK1;AKT2;PSMD3;RAC2;MLST8;AKT1;PIP5K1C;MAF1;MAPK3;MBD3;PDGFRB;JUN;PHC2;BDNF;BAD;EGF;ADRM1;RHOG;TSC2;NRG1;MOV10;NR4A1;PSMC3;PSMC4;AKT1S1;RPS6KB2;TRIB3;LAMTOR2;STUB1;LAMTOR4;FGFR4;FGFR3
Diseases of Signal Transduction by Growth Factor Receptors and Second Messengers	63/451	13.97	0.0173376	0.152629	1.3622	5.5236	PRR5;HDAC11;PSMD8;AKT2;PSMD3;PIM1;RAC2;MLST8;MYO18A;AKT1;JUNB;PSENEN;PDGFRB;MAP2K2;VWF;RHOG;AXIN1;AGTRAP;TSC2;NRG1;TYK2;GTF2F1;BCR;CDC37;AKT1S1;MYH9;SQSTM1;HDAC5;CEBPB;NOTCH1;SHC1;SRC;LRP5;PDGFA;PSMA7;HDAC7;PSMB6;PORCN;PSMB5;LMNA;POLR2E;POLR2F;CSK;POLR2I;POLR2J;CAMK2G;POLR2L;MAPK3;JUN;JAG1;BDNF;BAD;EGF;ADRM1;MIB2;MOV10;NR4A1;PSMC3;PSMC4;RPS6KB2;FGFR4;FGFR3;MAP3K11
EPH-ephrin Mediated Repulsion of Cells	11/51	21.57	0.0175879	0.152629	2.2957	9.2761	PSENEN;EFNB2;EFNA3;SRC;CLTB;AP2A1;AP2A2;MMP9;EPHB4;DNM1;EPHA2
IRE1alpha Activates Chaperones	11/51	21.57	0.0175879	0.152629	2.2957	9.2761	ZBTB17;ACADVL;CUL7;SHC1;WFS1;DDX11;LMNA;CXXC1;PREB;ARFGAP1;YIF1A
Integrin Cell Surface Interactions	16/85	18.82	0.0176617	0.152629	1.9372	7.8192	COL18A1;COL16A1;VWF;ITGA3;ICAM3;HSPG2;COL4A2;COL6A2;COL5A3;BSG;COL6A1;ITGAX;SPP1;COL9A3;ITGA5;AGRN
Gap Junction Trafficking and Regulation	11/51	21.57	0.0175879	0.152629	2.2957	9.2761	TUBA1C;TUBB6;TUBB2B;GJD3;TUBB2A;TUBB3;SRC;CLTB;TUBB4B;DNM1;TUBA4A
Signaling by Interleukins	63/452	13.94	0.0180995	0.155638	1.3586	5.4507	CXCL8;CSF1;CXCL2;PSMD8;PSMD3;RPS6KA1;PIM1;ITGAX;AKT1;IKBKG;TIMP1;IL13RA2;JUNB;MAP2K3;IL11;SERPINB2;IL1R1;AIP;TALDO1;TRAF2;TYK2;VRK3;IL17RC;MMP9;TNFRSF1A;SIGIRR;IL1A;IL1B;IL1RAPL1;FSCN1;LCP1;SQSTM1;STX1A;LRRC14;OPRD1;NLRX1;SHC1;PELI3;NLRC5;PSMA7;PSMB6;CNN2;PSMB5;IRAK1;STAT4;HMOX1;MAP2K7;MAPK3;JUN;CCL20;ADRM1;LIF;NFKB2;BATF;VEGFA;NFKBIA;MAPK11;PSMC3;PSMC4;TNIP2;CLCF1;TAB1;NFKBIB
RNA Polymerase II Transcription Elongation	12/58	20.69	0.0185617	0.158048	2.1781	8.6832	CTDP1;ELL;ERCC2;POLR2E;POLR2F;ELOB;NELFB;NELFA;GTF2F1;POLR2I;POLR2J;POLR2L
Formation of RNA Pol II Elongation Complex	12/58	20.69	0.0185617	0.158048	2.1781	8.6832	CTDP1;ELL;ERCC2;POLR2E;POLR2F;ELOB;NELFB;NELFA;GTF2F1;POLR2I;POLR2J;POLR2L
TAK1-dependent IKK and NF-kappa-B Activation	10/45	22.22	0.0188563	0.158997	2.3847	9.4696	LRRC14;NFKBIA;NLRX1;IRAK1;NLRC5;TRAF2;IKBKG;TAB1;NFKB2;NFKBIB
Somitogenesis	10/45	22.22	0.0188563	0.158997	2.3847	9.4696	LFNG;PSMB6;PSMD8;NOTCH1;PSMB5;PSMC3;PSMC4;PSMD3;ADRM1;PSMA7
Synthesis of GDP-mannose	3/6	50	0.0191966	0.161084	8.3343	32.9456	GMPPB;PMM1;GMPPA
PCP CE Pathway	15/79	18.99	0.0196539	0.161795	1.9576	7.6925	PRKCB;ADRM1;CLTB;AP2A1;AP2A2;PSMA7;PSMD8;PSMB6;PSMB5;PSMC3;PSMC4;PSMD3;DVL1;RAC2;RAC3
trans-Golgi Network Vesicle Budding	14/72	19.44	0.0195294	0.161795	2.0159	7.9341	NAPA;CLTB;AP1B1;HIP1R;GAK;DNAJC6;HGS;BLOC1S1;FTH1;AP1S1;AP1M2;FTL;AP1M1;TXNDC5
Switching of Origins to a Post-Replicative State	15/79	18.99	0.0196539	0.161795	1.9576	7.6925	CDT1;ADRM1;PSMA7;ANAPC11;PSMD8;PSMB6;FZR1;PSMB5;PSMC3;PSMC4;UBE2S;PSMD3;MCM5;ANAPC2;MCM2
M Phase	53/372	14.25	0.0194031	0.161795	1.3927	5.4904	PSMD8;TUBA1C;TUBB6;H2AC14;TUBB3;H2BC21;PSMD3;H4C1;SEC13;H2AC6;PRKCB;CEP131;HAUS5;RANGAP1;LEMD2;H2BC17;SIRT2;TUBA4A;MZT2B;H2BC12;MZT2A;H2BC13;TUBB2B;MAU2;TUBB2A;H2BC15;H2BC11;CHMP6;MAD1L1;ANAPC2;SSNA1;RAB1B;PMF1;PSMA7;ANAPC11;PSMB6;PSMB5;HAUS7;LMNA;MAPK3;CENPT;H2BC9;H2BC5;NCAPH2;ADRM1;TUBB4B;PSMC3;PSMC4;UBE2S;CENPM;TUBGCP6;B9D2;LPIN3
ZBP1(DAI) Mediated Induction of Type I IFNs	6/21	28.57	0.019857	0.162696	3.3361	13.075	NFKBIA;IRF3;NLRP4;IKBKG;NFKB2;NFKBIB
RNA Pol II CTD Phosphorylation and Interaction With CE During HIV Infection	7/27	25.93	0.0208565	0.168501	2.9197	11.2994	ERCC2;POLR2E;POLR2F;POLR2I;GTF2F1;POLR2J;POLR2L
RNA Pol II CTD Phosphorylation and Interaction With CE	7/27	25.93	0.0208565	0.168501	2.9197	11.2994	ERCC2;POLR2E;POLR2F;POLR2I;GTF2F1;POLR2J;POLR2L
Prefoldin Mediated Transfer of Substrate to CCT TriC	7/27	25.93	0.0208565	0.168501	2.9197	11.2994	TUBA1C;TUBB6;TUBB2B;TUBB2A;TUBB3;TUBB4B;TUBA4A
Arachidonate Metabolism	12/59	20.34	0.0210963	0.169649	2.1316	8.2252	CBR1;GPX1;GPX4;PTGES2;TBXAS1;AKR1C3;CYP1A1;GGT1;PTGR1;CYP4F11;PTGES;PTGS1
HDR Through Homologous Recombination (HRR) or Single Strand Annealing (SSA)	20/116	17.24	0.0218409	0.17344	1.7411	6.6578	PIAS4;MUS81;H2BC9;H2BC5;XRCC3;SIRT6;H2BC17;BABAM1;H2BC12;H2BC13;POLD4;PPP4C;H2BC15;EME2;H2BC21;POLD1;ERCC1;H2BC11;H4C1;RAD9A
Post NMDA Receptor Activation Events	15/80	18.75	0.0218672	0.17344	1.9274	7.368	SRC;NRG1;TUBB4B;TUBA4A;CAMKK1;TUBA1C;TUBB6;TUBB2B;TUBB2A;PRKAR1B;TUBB3;RPS6KA1;CAMK2G;GIT1;MAPK3
Metabolism of Polyamines	10/46	21.74	0.0218471	0.17344	2.3184	8.8647	PSMB6;PSMD8;PSMB5;PSMC3;SMOX;PSMC4;PSMD3;ADRM1;OAZ1;PSMA7
Pyrimidine Salvage	4/11	36.36	0.0234523	0.183498	4.7636	17.8768	TK1;UPP1;TYMP;UCKL1
NFE2L2 Regulating Tumorigenic Genes	4/11	36.36	0.0234523	0.183498	4.7636	17.8768	NOTCH1;EGF;PDGFA;MAFK
Nef Mediated Downregulation of MHC Class I Complex Cell Surface Expression	4/11	36.36	0.0234523	0.183498	4.7636	17.8768	AP1B1;AP1S1;AP1M2;AP1M1
CDK-mediated Phosphorylation and Removal of Cdc6	12/60	20	0.0238785	0.185165	2.0871	7.7948	PSMD8;PSMB6;FZR1;PSMB5;PSMC3;PSMC4;UBE2S;PSMD3;ADRM1;PSMA7;ANAPC2;ANAPC11
Formation of the Beta-Catenin TCF Transactivating Complex	12/60	20	0.0238785	0.185165	2.0871	7.7948	H2BC12;H2BC9;H2BC13;H2AC14;H2BC15;H2AC6;H2BC5;H2BC21;H2BC11;H4C1;H2BC17;BCL9L
Antigen Processing Ubiquitination & Proteasome Degradation	43/296	14.53	0.0243875	0.188271	1.4232	5.2855	CUL7;FBXO27;KEAP1;PSMA7;ANAPC11;PSMD8;PSMB6;FZR1;PSMB5;PSMD3;FBXO6;ELOB;UNKL;FBXW4;FBXW5;KLHL25;RNF25;FBXL19;FBXW9;ADRM1;MIB2;KLHL21;KLHL22;BTBD6;FBXL14;LRRC41;TRAIP;SPSB2;TRAF7;RNF126;CDC34;PSMC3;PSMC4;UBE2S;HECW2;ASB6;UBE2O;STUB1;RBCK1;THOP1;TRIM11;ANAPC2;UBE2M
Metabolic Disorders of Biological Oxidation Enzymes	8/34	23.53	0.0246284	0.188456	2.5671	9.5081	CYP27A1;CYP26B1;TBXAS1;FDXR;FDX2;GGT1;GCLM;CYP19A1
PI3K AKT Signaling in Cancer	19/110	17.27	0.0245241	0.188456	1.7446	6.4691	PDGFRB;PRR5;BDNF;SRC;BAD;EGF;RHOG;TSC2;PDGFA;NRG1;NR4A1;AKT2;AKT1S1;RPS6KB2;MLST8;RAC2;AKT1;FGFR4;FGFR3
Nef-mediates Down Modulation of Cell Surface Receptors by Recruiting Them to Clathrin Adapters	6/22	27.27	0.0248881	0.189608	3.1275	11.5508	AP1B1;AP1S1;AP2A1;AP2A2;AP1M2;AP1M1
Activation of AMPK Downstream of NMDARs	7/28	25	0.0253055	0.190284	2.7805	10.2231	TUBA1C;TUBB6;TUBB2B;TUBB2A;TUBB3;TUBB4B;TUBA4A
FGFR2 Alternative Splicing	7/28	25	0.0253055	0.190284	2.7805	10.2231	PTBP1;POLR2E;POLR2F;POLR2I;GTF2F1;POLR2J;POLR2L
Metabolism of Porphyrins	7/28	25	0.0253055	0.190284	2.7805	10.2231	ALAS1;ABCC2;FECH;UROD;SLCO2B1;HMOX1;BLVRB
Mitotic Prophase	19/111	17.12	0.0267149	0.198985	1.7255	6.2507	H2BC9;SEC13;H2AC6;H2BC5;PRKCB;NCAPH2;RAB1B;LEMD2;H2BC17;H2BC12;H2BC13;H2AC14;H2BC15;H2BC21;H2BC11;LMNA;H4C1;LPIN3;MAPK3
Neddylation	35/234	14.96	0.0268079	0.198985	1.4717	5.3262	CUL7;GPS1;FBXO27;KEAP1;PSMA7;DDA1;DPP3;PSMD8;PSMB6;PSMB5;PSMD3;FBXO6;ELOB;FBXW4;FBXW5;KLHL25;FBXL19;FBXW9;ADRM1;KLHL21;KLHL22;BTBD6;FBXL14;COMMD4;LRRC41;COMMD5;SPSB2;NPLOC4;PSMC3;PSMC4;ASB6;CCDC22;OBSL1;SQSTM1;UBE2M
Nucleotide-binding Domain, Leucine Rich Repeat Containing Receptor (NLR) Signaling Pathways	12/61	19.67	0.0269208	0.198985	2.0444	7.3901	PYCARD;MAPK11;IRAK1;HMOX1;IKBKG;TXN;NLRP1;TAB1;AAMP;MAPK12;BIRC3;NFKB2
APC C Cdh1 Mediated Degradation of Cdc20 and Other APC C Cdh1 Targets in Late Mitosis Early G1	12/61	19.67	0.0269208	0.198985	2.0444	7.3901	PSMD8;PSMB6;FZR1;PSMB5;PSMC3;PSMC4;UBE2S;PSMD3;ADRM1;PSMA7;ANAPC2;ANAPC11
MTOR Signalling	9/41	21.95	0.0271908	0.200129	2.3468	8.4598	RPTOR;AKT2;AKT1S1;EIF4EBP1;MLST8;AKT1;TSC2;LAMTOR2;LAMTOR4
Nucleotide Catabolism	8/35	22.86	0.0290172	0.210232	2.4719	8.7501	NT5C;ENTPD6;NUDT1;NUDT18;NT5M;UPP1;DNPH1;TYMP
Signaling by NTRK3 (TRKC)	5/17	29.41	0.0290476	0.210232	3.4741	12.2942	PTPRS;SHC1;SRC;BAX;NELFB
ABC-family Proteins Mediated Transport	16/90	17.78	0.0290444	0.210232	1.8058	6.3906	ABCC3;ABCA2;ABCC2;ABCB6;ADRM1;ABCB8;ABCB9;ABCC10;PSMA7;PSMD8;PSMB6;PSMB5;PSMC3;PSMC4;PSMD3;ABCD1
Gap Junction Trafficking	10/48	20.83	0.0288351	0.210232	2.1961	7.7877	TUBA1C;TUBB6;TUBB2B;GJD3;TUBB2A;TUBB3;CLTB;TUBB4B;DNM1;TUBA4A
APC C Cdc20 Mediated Degradation of Securin	11/55	20	0.0297918	0.214723	2.0866	7.3312	PSMD8;PSMB6;PSMB5;PSMC3;PSMC4;UBE2S;PSMD3;ADRM1;PSMA7;ANAPC2;ANAPC11
Regulation of Endogenous Retroelements by KRAB-ZFP Proteins	14/76	18.42	0.0300717	0.214957	1.8854	6.6067	H2BC9;MBD3;H2AC6;H2BC5;H2BC17;H2BC12;H2BC13;H2AC14;H2BC15;TRIM28;H2BC21;H2BC11;H4C1;ZNF534
Phase I - Functionalization of Compounds	18/105	17.14	0.0300387	0.214957	1.7283	6.0582	NQO2;MTARC1;SMOX;EPHX1;AIP;CYP4F11;CYP19A1;PTGS1;CYP27A1;CYP26A1;POR;CYP26B1;RXRA;TBXAS1;FDXR;FDX2;CYP1A1;CBR3
Kinesins	12/62	19.35	0.0302353	0.215241	2.0034	7.0093	TUBA1C;KLC4;TUBB6;TUBB2B;TUBB2A;KLC2;TUBB3;KIF21B;KIF22;KIF3C;TUBB4B;TUBA4A
mRNA Capping	7/29	24.14	0.0303616	0.215258	2.6539	9.2744	ERCC2;POLR2E;POLR2F;POLR2I;GTF2F1;POLR2J;POLR2L
Nectin Necl Trans Heterodimerization	3/7	42.86	0.0309429	0.217603	6.2504	21.7238	CADM3;NECTIN2;NECTIN1
IkBA Variant Leads to EDA-ID	3/7	42.86	0.0309429	0.217603	6.2504	21.7238	NFKBIA;IKBKG;NFKB2
Toll-like Receptor Cascades	27/174	15.52	0.0315882	0.218714	1.5356	5.3056	LRRC14;NLRX1;PELI3;NLRC5;LY96;ECSIT;IRAK1;CTSL;RPS6KA1;IKBKG;MAP2K7;IKBKE;MAPK3;MAP2K3;JUN;TRAF2;VRK3;DNM1;NFKB2;SIGIRR;NFKBIA;MAPK11;IRF3;TNIP2;TAB1;NFKBIB;BIRC3
Mitochondrial Translation Elongation	16/91	17.58	0.0318564	0.218714	1.7816	6.1404	MRPS28;GADD45GIP1;MRPS34;MRPL38;MRPS2;MRPL17;MRPL28;MRPL14;MRPL12;MRPL23;MRPL54;MRPL55;MRPL4;MRPL41;MRPL53;AURKAIP1
Mitochondrial Translation Termination	16/91	17.58	0.0318564	0.218714	1.7816	6.1404	MRPS28;GADD45GIP1;MRPS34;MRPL38;MRPS2;MRPL17;MRPL28;MRPL14;MRPL12;MRPL23;MRPL54;MRPL55;MRPL4;MRPL41;MRPL53;AURKAIP1
SCF-beta-TrCP Mediated Degradation of Emi1	9/42	21.43	0.0314218	0.218714	2.2755	7.8739	PSMB6;PSMD8;FZR1;PSMB5;PSMC3;PSMC4;PSMD3;ADRM1;PSMA7
Mitochondrial Translation Initiation	16/91	17.58	0.0318564	0.218714	1.7816	6.1404	MRPS28;GADD45GIP1;MRPS34;MRPL38;MRPS2;MRPL17;MRPL28;MRPL14;MRPL12;MRPL23;MRPL54;MRPL55;MRPL4;MRPL41;MRPL53;AURKAIP1
Degradation of AXIN	9/42	21.43	0.0314218	0.218714	2.2755	7.8739	PSMB6;PSMD8;PSMB5;PSMC3;PSMC4;PSMD3;ADRM1;AXIN1;PSMA7
Pyrimidine Catabolism	4/12	33.33	0.0322515	0.21969	4.1679	14.3134	NT5C;NT5M;UPP1;TYMP
Organic Anion Transporters	4/12	33.33	0.0322515	0.21969	4.1679	14.3134	SLC25A1;SLC25A10;SLC25A11;SLC25A22
Regulation of PTEN Stability and Activity	11/56	19.64	0.0336072	0.22803	2.0401	6.9221	PSMD8;PSMB6;PSMB5;PSMC3;PSMC4;AKT2;PSMD3;ADRM1;AKT1;STUB1;PSMA7
VEGFA-VEGFR2 Pathway	17/99	17.17	0.0338029	0.228465	1.7315	5.865	PRR5;JUP;PRKCB;SRC;SPHK1;CYBA;SHB;BAIAP2;MAPK12;VEGFA;MAPK11;AXL;AKT2;MLST8;AKT1;TRIB3;BCAR1
EPH-Ephrin Signaling	16/92	17.39	0.0348635	0.234629	1.7581	5.9007	PSENEN;SRC;LIMK1;CLTB;AP2A1;AP2A2;MMP9;DNM1;EFNB2;MYL6;EFNA3;MYH9;MYH14;EPHB4;GIT1;EPHA2
G2 M Checkpoints	22/137	16.06	0.034985	0.234629	1.5986	5.3597	PIAS4;H2BC9;H2BC5;ADRM1;H2BC17;PSMA7;PSMD8;BABAM1;H2BC12;PSMB6;H2BC13;H2BC15;PSMB5;PSMC3;PSMC4;H2BC21;PSMD3;H2BC11;MCM5;H4C1;RAD9A;MCM2
Homology Directed Repair	20/122	16.39	0.0354718	0.236979	1.6381	5.4697	PIAS4;MUS81;H2BC9;H2BC5;XRCC3;SIRT6;H2BC17;BABAM1;H2BC12;H2BC13;POLD4;PPP4C;H2BC15;EME2;H2BC21;POLD1;ERCC1;H2BC11;H4C1;RAD9A
Interconversion of Nucleotide Di- and Triphosphates	7/30	23.33	0.0360543	0.238123	2.5384	8.4345	DTYMK;GUK1;TXNRD1;AK1;GSR;GLRX;TXN
MET Activates PTK2 Signaling	7/30	23.33	0.0360543	0.238123	2.5384	8.4345	COL27A1;COL24A1;LAMB3;SRC;ITGA3;LAMB2;COL5A3
PTEN Regulation	23/145	15.86	0.0358409	0.238123	1.5755	5.2441	MBD3;HDAC5;JUN;PHC2;ADRM1;PSMA7;HDAC7;PSMD8;RPTOR;PSMB6;MOV10;PSMB5;PSMC3;PSMC4;AKT2;PSMD3;MLST8;AKT1;LAMTOR2;STUB1;MAF1;LAMTOR4;MAPK3
RHO GTPases Activate NADPH Oxidases	6/24	25	0.037335	0.240189	2.7796	9.139	MAPK11;PRKCB;RAC2;PIN1;CYBA;MAPK3
Transcription of the HIV Genome	13/71	18.31	0.0373334	0.240189	1.871	6.1516	CTDP1;ELL;GTF2F1;ERCC2;POLR2E;POLR2F;ELOB;NELFB;TAF6;NELFA;POLR2I;POLR2J;POLR2L
mTORC1-mediated Signalling	6/24	25	0.037335	0.240189	2.7796	9.139	RPTOR;AKT1S1;EIF4EBP1;MLST8;LAMTOR2;LAMTOR4
Regulation of NF-kappa B Signaling	5/18	27.78	0.0367646	0.240189	3.2067	10.5924	LRRC14;NLRX1;NLRC5;TRAF2;IKBKG
Pre-NOTCH Processing in Golgi	5/18	27.78	0.0367646	0.240189	3.2067	10.5924	LFNG;NOTCH1;FURIN;RFNG;ST3GAL3
Signaling by NTRK1 (TRKA)	19/115	16.52	0.0369749	0.240189	1.6532	5.4516	MAP2K2;SHC1;SRC;SRF;AP2A1;VRK3;AP2A2;DNM1;MAPK12;FOSL1;MAPK11;VGF;RPS6KA1;ID1;ID3;JUNB;RALGDS;DNAL4;MAPK3
CD28 Dependent PI3K Akt Signaling	6/24	25	0.037335	0.240189	2.7796	9.139	PRR5;AKT2;MLST8;AKT1;TRIB3;MAP3K14
Meiotic Recombination	11/57	19.3	0.0377549	0.241994	1.9956	6.539	H2BC12;H2BC9;H2BC13;H2AC14;H2BC15;H2AC6;H2BC5;H2BC21;H2BC11;H4C1;H2BC17
Synthesis of DNA	18/108	16.67	0.0384901	0.244004	1.6704	5.4412	CDT1;LIG1;ADRM1;PSMA7;ANAPC11;PSMD8;PSMB6;POLD4;FZR1;PSMB5;PSMC3;UBE2S;PSMC4;POLD1;PSMD3;MCM5;ANAPC2;MCM2
Metabolism of Proteins	246/2067	11.9	0.0382376	0.244004	1.1406	3.7229	ECI1;KEAP1;RPL8;RPS15;PSMD8;H2AC11;H2AC12;LGALS1;H2AC14;TRIM28;RPL18A;RPS19;PSMD3;LONP1;RPL36;RPL35;FBXO6;H4C1;RPS10;ARSA;JMJD4;ECH1;MOGS;JMJD7;HSPG2;CDC34;CLPP;PREB;TTLL12;AURKAIP1;OBSL1;STX1A;LYPD1;MRPL17;MRPL14;TXN;MRPL12;ADAMTS15;ARSL;STC2;RCE1;ST3GAL3;PHC2;PRELID1;PMM1;ST8SIA2;MRPL28;MRPL23;RPS28;NPLOC4;H2AC21;HRC;PSMG3;FARSA;BAP1;UBXN1;GPAA1;PIGQ;RPLP1;MRPL38;DDA1;MRPL41;BABAM1;TRMT112;TUBA…
Signaling by VEGF	18/108	16.67	0.0384901	0.244004	1.6704	5.4412	PRR5;JUP;PRKCB;SRC;SPHK1;CYBA;SHB;BAIAP2;MAPK12;VEGFA;MAPK11;AXL;AKT2;MLST8;AKT1;TRIB3;AAMP;BCAR1
Gap Junction Assembly	8/37	21.62	0.0393462	0.245843	2.3011	7.445	TUBA1C;TUBB6;TUBB2B;GJD3;TUBB2A;TUBB3;TUBB4B;TUBA4A
Regulation of Activated PAK-2p34 by Proteasome Mediated Degradation	8/37	21.62	0.0393462	0.245843	2.3011	7.445	PSMB6;PSMD8;PSMB5;PSMC3;PSMC4;PSMD3;ADRM1;PSMA7
TP53 Regulates Metabolic Genes	15/86	17.44	0.0392647	0.245843	1.7639	5.7106	COX8A;G6PD;TXNRD1;GSR;TSC2;TXN;COX5B;RPTOR;PRDX2;MOV10;AKT2;MLST8;AKT1;LAMTOR2;LAMTOR4
C-type Lectin Receptors (CLRs)	21/131	16.03	0.039341	0.245843	1.595	5.1605	SRC;ADRM1;ICAM3;MUC5B;PSMA7;NFKB2;RELB;PSMD8;PYCARD;NFKBIA;PSMB6;CDC34;PSMB5;PSMC3;PSMC4;IL1B;PSMD3;TAB1;IKBKG;MAP3K14;UBE2M
COPI-dependent Golgi-to-ER Retrograde Traffic	17/101	16.83	0.0400016	0.249042	1.6901	5.4401	NAPA;RAB1B;KIF22;TUBB4B;TUBA4A;ARFGAP1;KLC4;TUBA1C;TUBB6;TUBB2B;KLC2;TUBB2A;TUBB3;KIF21B;KIF3C;COPE;ARF5
Collagen Chain Trimerization	9/44	20.45	0.0412091	0.253831	2.1453	6.8415	COL18A1;COL16A1;COL27A1;COL24A1;COL4A2;COL5A3;COL6A2;COL6A1;COL9A3
Elastic Fibre Formation	9/44	20.45	0.0412091	0.253831	2.1453	6.8415	EFEMP2;LTBP4;FURIN;LTBP2;EMILIN1;LTBP3;ITGA5;LOXL1;LOXL2
Negative Regulation of NOTCH4 Signaling	9/44	20.45	0.0412091	0.253831	2.1453	6.8415	PSMB6;PSMD8;PSMB5;PSMC3;PSMC4;PSMD3;ADRM1;AKT1;PSMA7
Turbulent Flow Shear Stress Activates Signaling by PIEZO1 and Integrins in Endothelial Cells	7/31	22.58	0.0424083	0.256807	2.4325	7.6877	NFKBIA;CAPNS1;GNA11;PIEZO1;IKBKG;ITGA5;IKBKE
Orc1 Removal From Chromatin	11/58	18.97	0.042247	0.256807	1.9531	6.1799	PSMD8;PSMB6;CDT1;PSMB5;PSMC3;PSMC4;PSMD3;ADRM1;MCM5;PSMA7;MCM2
RHO GTPases Activate IQGAPs	7/31	22.58	0.0424083	0.256807	2.4325	7.6877	TUBA1C;TUBB6;TUBB2B;TUBB2A;TUBB3;TUBB4B;TUBA4A
p38MAPK Events	4/13	30.77	0.0427272	0.256807	3.7046	11.6803	MAPK11;SRC;RALGDS;MAPK12
Purine Salvage	4/13	30.77	0.0427272	0.256807	3.7046	11.6803	AMPD2;AMPD3;ADA;APRT
NF-kB Is Activated and Signals Survival	4/13	30.77	0.0427272	0.256807	3.7046	11.6803	NFKBIA;NGFR;IRAK1;SQSTM1
Signaling by PDGF	11/58	18.97	0.042247	0.256807	1.9531	6.1799	PDGFRB;COL4A2;SRC;COL6A2;COL5A3;COL6A1;SPP1;PDGFA;FURIN;COL9A3;BCAR1
Processing of DNA Double-Strand Break Ends	14/80	17.5	0.0442639	0.265125	1.7707	5.5204	PIAS4;H2BC9;H2BC5;SIRT6;H2BC17;BABAM1;H2BC12;H2BC13;H2BC15;PPP4C;H2BC21;H2BC11;H4C1;RAD9A
Signal Transduction	306/2613	11.71	0.0445243	0.265769	1.1214	3.4895	HDAC11;SERPINE1;WDR83;GRPR;FGFRL1;PSMD8;BAIAP2L2;H2AC14;AKT2;RPS6KA1;PSMD3;AKT1;H4C1;JUNB;PRKCB;ACTN1;BCR;TIAM2;MYL6;PRKAR1B;CDC37;HECW1;TRIB3;ULK1;RBCK1;EPHA2;PDGFA;RHOT2;PIP5K1C;RCE1;RALGDS;ST3GAL3;NGFR;JUN;PHC2;JAG1;JUP;COL24A1;MCAM;FOSL1;MOV10;CYP26A1;MC1R;GIPC1;ID1;ID3;COL9A3;ACVRL1;PTPRU;PTPRS;CLTB;AP2A1;SHB;AP2A2;CX3CL1;LFNG;RPTOR;TUBA1C;UCN2;DNER;RAC2;RAC3;NELFB;TIMP1;IKBKG;IKBKE;CTSD;GIT…
Unfolded Protein Response (UPR)	16/95	16.84	0.045119	0.268396	1.691	5.2396	ZBTB17;ACADVL;CEBPB;CUL7;CXCL8;SHC1;WFS1;DDX11;CXXC1;ARFGAP1;YIF1A;CREB3;EXOSC5;EXOSC4;LMNA;PREB
Resolution of Abasic Sites (AP Sites)	8/38	21.05	0.0453267	0.268711	2.2243	6.8817	POLD4;LIG1;MPG;NTHL1;PNKP;POLD1;ADPRS;MUTYH
RHO GTPases Activate CIT	5/19	26.32	0.0456239	0.269553	2.9775	9.1924	MYL6;MYH14;MYH9;RHOC;RHOB
Carboxyterminal Post-Translational Modifications of Tubulin	9/45	20	0.0467973	0.272933	2.0856	6.3858	TUBA1C;TUBB6;TUBB2B;TTLL4;TUBB2A;TUBB3;TTLL12;TUBB4B;TUBA4A
Epigenetic Regulation of Adipogenesis Genes by MLL3 and MLL4 Complexes	17/103	16.5	0.0469816	0.272933	1.6506	5.0475	H2BC9;H2AC6;H2BC5;GPS2;MED16;MED27;H2BC17;AGPAT2;H2BC12;H2BC13;H2AC14;H2BC15;RXRA;H2BC21;H2BC11;H4C1;PNPLA2
MLL4 and MLL3 Complexes Regulate Expression of PPARG Targets in Adipogenesis and Hepatic Steatosis	17/103	16.5	0.0469816	0.272933	1.6506	5.0475	H2BC9;H2AC6;H2BC5;GPS2;MED16;MED27;H2BC17;AGPAT2;H2BC12;H2BC13;H2AC14;H2BC15;RXRA;H2BC21;H2BC11;H4C1;PNPLA2
Epigenetic Regulation of Gene Expression by MLL3 and MLL4 Complexes	17/103	16.5	0.0469816	0.272933	1.6506	5.0475	H2BC9;H2AC6;H2BC5;GPS2;MED16;MED27;H2BC17;AGPAT2;H2BC12;H2BC13;H2AC14;H2BC15;RXRA;H2BC21;H2BC11;H4C1;PNPLA2
Regulation of RUNX3 Expression and Activity	9/45	20	0.0467973	0.272933	2.0856	6.3858	PSMB6;PSMD8;PSMB5;PSMC3;SRC;PSMC4;PSMD3;ADRM1;PSMA7
Proteasome Assembly	10/52	19.23	0.0472837	0.273773	1.9865	6.062	PSMD8;PSMB6;PSMB5;PSMC3;PSMC4;PSMD3;ADRM1;PSMG3;PSMA7;PSMB10
Regulation of Endogenous Retroelements	18/111	16.22	0.0485519	0.280181	1.6163	4.8894	H2BC9;MBD3;SMARCD3;H2AC6;H2BC5;H2BC17;SPOCD1;H2BC12;H2BC13;H2AC14;H2BC15;TRIM28;BCL7C;H2BC21;DPF1;H2BC11;H4C1;ZNF534
Neutrophil Degranulation	63/478	13.18	0.049418	0.283444	1.2716	3.8243	PYGB;GHDC;TCIRG1;AP2A2;PYCARD;FTH1;PSMD3;TOM1;ITGAX;QSOX1;CAPN1;CTSD;CD53;ARSA;DBNL;DGAT1;GAA;RHOG;PLAUR;CYBA;TMC6;KCNAB2;AMPD3;ATAD3B;MMP9;UNC13D;APRT;PKM;CRISPLD2;DNAJC5;ALDOA;ATP6V0C;FTL;GRN;CANT1;GSTP1;HVCN1;MVP;AGPAT2;CST3;CNN2;TRPM2;SYNGR1;DPP7;ALDH3B1;PSAP;CD55;AP1M1;TXNDC5;JUP;STK11IP;PTGES2;NBEAL2;TUBB4B;BST2;PFKL;LRG1;PSMC3;IMPDH1;LAMTOR2;MAN2B1;CD68;GLA
Cooperation of Prefoldin and TriC CCT in Actin and Tubulin Folding	7/32	21.88	0.0494437	0.283444	2.3351	7.0214	TUBA1C;TUBB6;TUBB2B;TUBB2A;TUBB3;TUBB4B;TUBA4A
Ubiquitin Mediated Degradation of Phosphorylated Cdc25A	8/39	20.51	0.0518727	0.28972	2.1524	6.369	PSMB6;PSMD8;PSMB5;PSMC3;PSMC4;PSMD3;ADRM1;PSMA7
Association of TriC CCT With Target Proteins During Biosynthesis	8/39	20.51	0.0518727	0.28972	2.1524	6.369	FBXW4;FBXW5;USP11;SPHK1;FBXW9;FBXO6;KIFC3;WRAP53
Autodegradation of the E3 Ubiquitin Ligase COP1	8/39	20.51	0.0518727	0.28972	2.1524	6.369	PSMB6;PSMD8;PSMB5;PSMC3;PSMC4;PSMD3;ADRM1;PSMA7
p53-Independent DNA Damage Response	8/39	20.51	0.0518727	0.28972	2.1524	6.369	PSMB6;PSMD8;PSMB5;PSMC3;PSMC4;PSMD3;ADRM1;PSMA7
Selective Autophagy	15/89	16.85	0.0509491	0.28972	1.6921	5.0374	TOMM40;SRC;ATG9A;TUBB4B;TUBA4A;TUBA1C;TUBB6;TUBB2B;PINK1;TUBB2A;TUBB3;HSF1;PLIN3;ULK1;SQSTM1
p53-Independent G1 S DNA Damage Checkpoint	8/39	20.51	0.0518727	0.28972	2.1524	6.369	PSMB6;PSMD8;PSMB5;PSMC3;PSMC4;PSMD3;ADRM1;PSMA7
Ubiquitin-dependent Degradation of Cyclin D	8/39	20.51	0.0518727	0.28972	2.1524	6.369	PSMB6;PSMD8;PSMB5;PSMC3;PSMC4;PSMD3;ADRM1;PSMA7
Epigenetic Regulation by WDR5-containing Histone Modifying Complexes	21/135	15.56	0.051849	0.28972	1.5386	4.5535	H2BC9;H2AC6;H2BC5;MCRS1;CXXC1;GPS2;SGF29;MED16;MED27;H2BC17;AGPAT2;H2BC12;H2BC13;H2AC14;H2BC15;RXRA;H2BC21;TADA3;H2BC11;H4C1;PNPLA2
Transcriptional Regulation by TP53	49/362	13.54	0.0520454	0.289753	1.3102	3.8725	PRR5;ELL;NOC2L;BBC3;RPTOR;AIFM2;AKT2;MLST8;AKT1;TNKS1BP1;ELOB;NELFB;NELFA;COX8A;G6PD;PRMT1;TSC2;GTF2F1;RABGGTA;CTDP1;TXN;COX5B;NDRG1;PRDX2;POLR2E;PMAIP1;POLR2F;E2F4;POLR2I;RFFL;POLR2J;BANP;POLR2L;MBD3;PLK3;JUN;PRELID1;TXNRD1;GSR;MOV10;MAPK11;RGCC;ERCC2;PIN1;BAX;LAMTOR2;TAF6;LAMTOR4;RAD9A
Cdc20 Phospho-APC C Mediated Degradation of Cyclin A	11/60	18.33	0.0523057	0.290271	1.8731	5.527	PSMD8;PSMB6;PSMB5;PSMC3;PSMC4;UBE2S;PSMD3;ADRM1;PSMA7;ANAPC2;ANAPC11
A Tetrasaccharide Linker Sequence Is Required for GAG Synthesis	6/26	23.08	0.0531672	0.292251	2.5014	7.3399	B3GAT3;GPC1;XYLT2;AGRN;HSPG2;B4GALT7
Oxygen-dependent Proline Hydroxylation of Hypoxia-inducible Factor Alpha	10/53	18.87	0.0529063	0.292251	1.9402	5.7027	PSMD8;PSMB6;PSMB5;PSMC3;PSMC4;PSMD3;ADRM1;ELOB;WTIP;PSMA7
Mitochondrial Translation	16/97	16.49	0.0530438	0.292251	1.6491	4.8428	MRPS28;GADD45GIP1;MRPS34;MRPL38;MRPL17;MRPL28;MRPS2;MRPL14;MRPL12;MRPL23;MRPL54;MRPL55;MRPL4;MRPL41;MRPL53;AURKAIP1
Tryptophan Catabolism	4/14	28.57	0.0548868	0.295165	3.334	9.6768	SLC7A5;KYNU;SLC3A2;KYAT1
Synthesis of Bile Acids and Bile Salts via 27-Hydroxycholesterol	4/14	28.57	0.0548868	0.295165	3.334	9.6768	CYP27A1;RXRA;AKR1C1;AKR1C3
Uptake and Function of Anthrax Toxins	4/14	28.57	0.0548868	0.295165	3.334	9.6768	MAP2K3;MAP2K2;FURIN;MAP2K7
Nuclear Envelope (NE) Reassembly	13/75	17.33	0.0547412	0.295165	1.7499	5.0837	SEC13;RANGAP1;TUBB4B;LEMD2;SIRT2;TUBA4A;TUBA1C;TUBB6;TUBB2B;TUBB2A;TUBB3;LMNA;CHMP6
Cyclin A Cdk2-associated Events at S Phase Entry	13/75	17.33	0.0547412	0.295165	1.7499	5.0837	LIN37;ADRM1;PSMA7;PSMD8;PSMB6;FZR1;PSMB5;PSMC3;PSMC4;AKT2;PSMD3;AKT1;E2F4
Retrograde Neurotrophin Signalling	4/14	28.57	0.0548868	0.295165	3.334	9.6768	AP2A1;AP2A2;DNAL4;DNM1
SEMA3A-Plexin Repulsion Signaling by Inhibiting Integrin Adhesion	4/14	28.57	0.0548868	0.295165	3.334	9.6768	RRAS;FES;PIP5K1C;PLXNA3
Protein Hydroxylation	5/20	25	0.0556437	0.295575	2.7788	8.0274	JMJD4;U2AF2;DRG2;JMJD7;RPL8
TP53 Regulates Transcription of Genes Involved in Cytochrome C Release	5/20	25	0.0556437	0.295575	2.7788	8.0274	PRELID1;AIFM2;BAX;PMAIP1;BBC3
Signaling by Hedgehog	21/136	15.44	0.0553743	0.295575	1.5252	4.4133	IFT140;ADRM1;IQCE;KIF7;TUBB4B;ADCY7;TUBA4A;PSMA7;PSMD8;PSMB6;TUBA1C;TUBB6;TUBB2B;GRK2;TUBB2A;PSMB5;PRKAR1B;PSMC3;TUBB3;PSMC4;PSMD3
Signalling to RAS	5/20	25	0.0556437	0.295575	2.7788	8.0274	MAPK11;SHC1;SRC;RALGDS;MAPK12
Downstream Signaling Events of B Cell Receptor (BCR)	12/68	17.65	0.0564401	0.297581	1.7881	5.1401	PSMD8;PSMB6;NFKBIA;PSMB5;PSMC3;PRKCB;PSMC4;PSMD3;ADRM1;IKBKG;PSMA7;NFKBIB
Asparagine N-linked Glycosylation	42/306	13.73	0.0566823	0.297581	1.3308	3.8196	NAPA;UBXN1;PRKCSH;RAB1B;SPTA1;GMPPB;TUBA1C;TUBB6;TUBB3;PPP6R1;LMAN2;AMDHD2;GMPPA;NUDT14;CD55;ST3GAL3;MPDU1;SEC13;PMM1;ST8SIA2;TRAPPC5;MOGS;ALG12;TUBB4B;RENBP;TUBA4A;ARFGAP1;DPM2;TUBB2B;DPM3;TRAPPC6A;TUBB2A;TMEM115;DOLPP1;MGAT4B;PREB;MVD;ST6GALNAC4;ARF5;COPE;ENGASE;ST6GALNAC6
Regulation of APC C Activators Between G1 S and Early Anaphase	12/68	17.65	0.0564401	0.297581	1.7881	5.1401	PSMD8;PSMB6;FZR1;PSMB5;PSMC3;PSMC4;UBE2S;PSMD3;ADRM1;PSMA7;ANAPC2;ANAPC11
Cell Cycle, Mitotic	67/516	12.98	0.0567066	0.297581	1.2499	3.5871	PSMD8;TUBA1C;TUBB6;H2AC14;TUBB3;AKT2;H2BC21;PSMD3;AKT1;MYBL2;TK1;H4C1;SEC13;H2AC6;LIG1;PRKCB;CEP131;HAUS5;RANGAP1;LEMD2;H2BC17;SIRT2;TUBA4A;MZT2B;H2BC12;MZT2A;H2BC13;TUBB2B;MAU2;TUBB2A;H2BC15;H2BC11;MCM5;CHMP6;MAD1L1;ANAPC2;MCM2;LIN37;SRC;RAB1B;SSNA1;PMF1;PSMA7;ANAPC11;PSMB6;POLD4;FZR1;PSMB5;HAUS7;POLD1;LMNA;E2F4;MAPK3;CENPT;H2BC9;CDT1;H2BC5;NCAPH2;ADRM1;TUBB4B;PSMC3;PSMC4;UBE2S;CENPM;TUBGCP6;B9D…
Apoptosis	25/168	14.88	0.057118	0.298662	1.4606	4.1812	LY96;PSMA7;BBC3;PSMD8;PSMB6;PSMB5;AKT2;PSMD3;LMNA;AKT1;PMAIP1;MAPK3;DBNL;BAD;DAPK2;DAPK3;ADRM1;TRAF2;H1-2;H1-5;H1-4;PSMC3;PSMC4;BAX;PLEC
Fatty Acid Metabolism	26/176	14.77	0.0572565	0.298662	1.4483	4.1423	ACADVL;ECI1;TECR;PTGS1;RXRA;GGT1;ABCD1;ACADS;CBR1;ACOT8;ACOT7;GPX1;GPX4;PTGES2;ACOT11;AKR1C3;ACOT13;CYP4F11;PTGR1;ACSF3;ACSF2;TBXAS1;CYP1A1;ACOX3;CRAT;PTGES
Regulation of PTEN Gene Transcription	11/61	18.03	0.0578903	0.300166	1.8356	5.2299	RPTOR;MBD3;HDAC5;JUN;PHC2;MLST8;LAMTOR2;MAF1;LAMTOR4;HDAC7;MAPK3
APC Cdc20 Mediated Degradation of Cell Cycle Proteins Prior to Satisfation of the Checkpoint	11/61	18.03	0.0578903	0.300166	1.8356	5.2299	PSMD8;PSMB6;PSMB5;PSMC3;PSMC4;UBE2S;PSMD3;ADRM1;PSMA7;ANAPC2;ANAPC11
Regulation of Apoptosis	8/40	20	0.0589966	0.30323	2.085	5.9013	PSMB6;PSMD8;PSMB5;PSMC3;PSMC4;PSMD3;ADRM1;PSMA7
Transcriptional Regulation by RUNX2	17/106	16.04	0.0590051	0.30323	1.5947	4.5132	ESRRA;SRC;ADRM1;PSMA7;PSMD8;PSMB6;MMP13;PSMB5;PSMC3;PSMC4;AKT2;PSMD3;AKT1;BAX;STUB1;ITGA5;MAPK3
Vpu Mediated Degradation of CD4	8/40	20	0.0589966	0.30323	2.085	5.9013	PSMB6;PSMD8;PSMB5;PSMC3;PSMC4;PSMD3;ADRM1;PSMA7
TGF-beta Receptor Signaling Activates SMADs	9/47	19.15	0.0594265	0.304495	1.9756	5.5771	PPP1R15A;LTBP4;FURIN;LTBP2;STUB1;LTBP3;PPP1CA;SMAD7;UBE2M
Regulation of mRNA Stability by Proteins That Bind AU-rich Elements	13/76	17.11	0.0598318	0.304774	1.722	4.8496	ADRM1;PSMA7;PSMD8;PSMB6;MAPK11;EXOSC5;GPRC5A;EXOSC4;PSMB5;PSMC3;PSMC4;PSMD3;AKT1
Transcription-Coupled Nucleotide Excision Repair (TC-NER)	13/76	17.11	0.0598318	0.304774	1.722	4.8496	ELL;LIG1;GPS1;POLD4;XAB2;POLD1;ERCC1;ERCC2;POLR2E;POLR2F;POLR2I;POLR2J;POLR2L
Signaling by TGFB Family Members	24/161	14.91	0.0603237	0.306381	1.4634	4.1093	ACVRL1;PSENEN;PPP1R15A;SERPINE1;LTBP4;ARHGEF18;LTBP2;FURIN;LTBP3;KLF16;SMAD7;FSTL3;PPP1CA;DRAP1;MOV10;RXRA;GIPC1;RARA;STUB1;TIMP1;E2F4;JUNB;UBE2M;MAPK3
Interleukin-1 Processing	3/9	33.33	0.0631058	0.311406	4.1664	11.5116	IL1A;IL1B;NFKB2
Displacement of DNA Glycosylase by APEX1	3/9	33.33	0.0631058	0.311406	4.1664	11.5116	MPG;NTHL1;MUTYH
Integrin Signaling	6/27	22.22	0.0623988	0.311406	2.3822	6.6086	VWF;SHC1;SRC;AKT1;CSK;BCAR1
Purinergic Signaling in Leishmaniasis Infection	6/27	22.22	0.0623988	0.311406	2.3822	6.6086	PYCARD;IL1A;IL1B;HMOX1;TXN;NFKB2
CD163 Mediating an Anti-Inflammatory Response	3/9	33.33	0.0631058	0.311406	4.1664	11.5116	RHBDF2;MYH9;FURIN
Beta-oxidation of pristanoyl-CoA	3/9	33.33	0.0631058	0.311406	4.1664	11.5116	ACOT8;ACOX3;CRAT
PTK6 Regulates RTKs and Their Effectors AKT1 and DOK1	3/9	33.33	0.0631058	0.311406	4.1664	11.5116	DOK1;AKT1;ARAP1
Cell Recruitment (Pro-Inflammatory Response)	6/27	22.22	0.0623988	0.311406	2.3822	6.6086	PYCARD;IL1A;IL1B;HMOX1;TXN;NFKB2
BH3-only Proteins Associate With and Inactivate Anti-Apoptotic BCL-2 Members	3/9	33.33	0.0631058	0.311406	4.1664	11.5116	BAD;PMAIP1;BBC3
Axonal Growth Inhibition (RHOA Activation)	3/9	33.33	0.0631058	0.311406	4.1664	11.5116	NGFR;MAG;ARHGDIA
Transcriptional Regulation by RUNX1	29/202	14.36	0.0634175	0.312057	1.4008	3.8634	SMARCD3;SRC;GATA2;PSMA7;PSMD8;PSMB6;H2AC14;PSMB5;SIN3B;CTSL;H2BC21;PSMD3;H4C1;H2BC9;PHC2;H2BC5;H2AC6;PRKCB;PRMT1;ADRM1;AXIN1;H2BC17;H2BC12;MOV10;H2BC13;H2BC15;PSMC3;PSMC4;H2BC11
Cellular Response to Hypoxia	11/62	17.74	0.0638551	0.313323	1.7995	4.9506	PSMD8;PSMB6;PSMB5;PSMC3;PSMC4;PSMD3;ADRM1;ELOB;WTIP;PSMA7;VEGFA
Protein Ubiquitination	13/77	16.88	0.0652299	0.319167	1.695	4.6271	H2BC9;USP5;H2BC5;H2BC17;RNF40;PEX14;H2BC12;H2BC13;CDC34;H2BC15;UBE2S;H2BC11;RNF181
Signalling to ERKs	7/34	20.59	0.0656137	0.320143	2.1619	5.8889	MAPK11;MAP2K2;SHC1;SRC;RALGDS;MAPK12;MAPK3
RMTs Methylate Histone Arginines	9/48	18.75	0.0664861	0.323491	1.9248	5.2177	H2AC11;H2AC12;SMARCD3;H2AC14;PRMT7;H2AC6;PRMT1;H2AC21;H4C1
RHO GTPases Activate PAKs	5/21	23.81	0.0668271	0.324242	2.605	7.0482	MYL6;LIMK1;FLNA;MYH14;MYH9
Glucose Metabolism	14/85	16.47	0.0678804	0.328435	1.6456	4.4266	SEC13;PFKFB4;TPI1;ENO1;ENO2;ENO3;PFKL;PKM;G6PC3;PC;PGP;ALDOA;GAPDH;PFKP
Diseases Associated With Glycosylation Precursor Biosynthesis	4/15	26.67	0.0687048	0.329669	3.0307	8.116	DPM2;DPM3;GALE;GALK1
Depolymerization of the Nuclear Lamina	4/15	26.67	0.0687048	0.329669	3.0307	8.116	PRKCB;LMNA;LEMD2;LPIN3
WNT5A-dependent Internalization of FZD4	4/15	26.67	0.0687048	0.329669	3.0307	8.116	PRKCB;CLTB;AP2A1;AP2A2
NCAM Signaling for Neurite Out-Growth	11/63	17.46	0.0702058	0.334103	1.7648	4.6878	SPTA1;PRNP;COL4A2;SRC;COL6A2;ST8SIA2;COL5A3;COL6A1;COL9A3;AGRN;MAPK3
APC C Cdc20 Mediated Degradation of Mitotic Proteins	11/63	17.46	0.0702058	0.334103	1.7648	4.6878	PSMD8;PSMB6;PSMB5;PSMC3;PSMC4;UBE2S;PSMD3;ADRM1;PSMA7;ANAPC2;ANAPC11
MAP Kinase Activation	11/63	17.46	0.0702058	0.334103	1.7648	4.6878	MAP2K3;MAPK11;JUN;IRAK1;TNIP2;RPS6KA1;IKBKG;TAB1;VRK3;MAP2K7;MAPK3
Regulation of Expression of SLITs and ROBOs	24/164	14.63	0.071544	0.339541	1.4318	3.7763	ROBO3;RPS5;RPLP1;ADRM1;RPL8;PSMA7;PSMD8;RPS15;PSMB6;RPS28;PSMB5;RPL18A;RPS19;PSMC3;PSMC4;PSMD3;RPL36;ZSWIM8;RPL35;RPLP2;ELOB;FAU;RPL18;RPS10
GSK3B and BTRC CUL1-mediated-degradation of NFE2L2	8/42	19.05	0.0750095	0.347444	1.9622	5.0823	PSMB6;PSMD8;PSMB5;PSMC3;PSMC4;PSMD3;ADRM1;PSMA7
TCF Dependent Signaling in Response to WNT	27/189	14.29	0.0746585	0.347444	1.3923	3.6127	LRP5;PSMA7;PSMD8;PSMB6;H2AC14;PSMB5;AKT2;H2BC21;PSMD3;DVL1;AKT1;H4C1;BCL9L;H2BC9;H2AC6;H2BC5;ADRM1;AXIN1;H2BC17;H2BC12;H2BC13;H2BC15;PSMC3;PSMC4;HECW1;H2BC11;CSNK1G2
FBXL7 Down-Regulates AURKA During Mitotic Entry and in Early Mitosis	8/42	19.05	0.0750095	0.347444	1.9622	5.0823	PSMB6;PSMD8;PSMB5;PSMC3;PSMC4;PSMD3;ADRM1;PSMA7
Chromatin Organization	33/238	13.87	0.0744758	0.347444	1.3453	3.4941	SMARCD3;SUV39H1;DOT1L;GPS2;SGF29;H2AC11;H2AC12;H2AC14;RUVBL2;H2BC21;HMG20B;H4C1;DMAP1;H2BC9;MBD3;KDM4B;PRMT7;H2BC5;H2AC6;PRMT1;KMT5C;MCRS1;H2BC17;H2BC18;NFKB2;H2BC12;TAF6L;H2BC13;BRMS1;H2BC15;H2AC21;TADA3;H2BC11
Chromatin Modifying Enzymes	33/238	13.87	0.0744758	0.347444	1.3453	3.4941	SMARCD3;SUV39H1;DOT1L;GPS2;SGF29;H2AC11;H2AC12;H2AC14;RUVBL2;H2BC21;HMG20B;H4C1;DMAP1;H2BC9;MBD3;KDM4B;PRMT7;H2BC5;H2AC6;PRMT1;KMT5C;MCRS1;H2BC17;H2BC18;NFKB2;H2BC12;TAF6L;H2BC13;BRMS1;H2BC15;H2AC21;TADA3;H2BC11
Translocation of SLC2A4 (GLUT4) to the Plasma Membrane	12/71	16.9	0.073986	0.347444	1.6969	4.4186	TUBA1C;TUBB6;TUBB2B;TUBB2A;MYO1C;TUBB3;AKT2;ASPSCR1;AKT1;MYH9;TUBB4B;TUBA4A
CD28 Co-Stimulation	7/35	20	0.0747628	0.347444	2.0845	5.4061	PRR5;SRC;AKT2;MLST8;AKT1;TRIB3;MAP3K14
AUF1 (hnRNP D0) Binds and Destabilizes mRNA	8/42	19.05	0.0750095	0.347444	1.9622	5.0823	PSMB6;PSMD8;PSMB5;PSMC3;PSMC4;PSMD3;ADRM1;PSMA7
NCAM1 Interactions	8/42	19.05	0.0750095	0.347444	1.9622	5.0823	PRNP;COL4A2;ST8SIA2;COL5A3;COL6A2;COL6A1;COL9A3;AGRN
Activation of APC C and APC C Cdc20 Mediated Degradation of Mitotic Proteins	11/64	17.19	0.0769468	0.354527	1.7314	4.4404	PSMD8;PSMB6;PSMB5;PSMC3;PSMC4;UBE2S;PSMD3;ADRM1;PSMA7;ANAPC2;ANAPC11
Semaphorin Interactions	11/64	17.19	0.0769468	0.354527	1.7314	4.4404	MYL6;RRAS;FES;LIMK1;PLXNB3;MYH9;MYH14;PIP5K1C;RHOC;RHOB;PLXNA3
Class I MHC Mediated Antigen Processing & Presentation	49/373	13.14	0.0784911	0.360686	1.2649	3.219	FBXO27;KEAP1;PSMD8;MRC2;CTSL;PSMD3;FBXO6;ELOB;IKBKG;UNKL;FBXW4;SEC13;FBXW5;FBXW9;CYBA;LRRC41;TRAIP;TRAF7;RNF126;CDC34;HECW2;RBCK1;THOP1;TRIM11;ANAPC2;CUL7;LY96;PSMA7;ANAPC11;PSMB6;FZR1;PSMB5;KLHL25;RNF25;FBXL19;ADRM1;MIB2;KLHL21;KLHL22;BTBD6;FBXL14;SPSB2;PSMC3;PSMC4;UBE2S;ASB6;UBE2O;STUB1;UBE2M
S Phase	22/150	14.67	0.0801245	0.361457	1.4352	3.6226	CDT1;LIG1;LIN37;ADRM1;PSMA7;ANAPC11;PSMD8;PSMB6;POLD4;FZR1;PSMB5;PSMC3;UBE2S;PSMC4;AKT2;POLD1;PSMD3;AKT1;MCM5;E2F4;ANAPC2;MCM2
E3 Ubiquitin Ligases Ubiquitinate Target Proteins	10/57	17.54	0.079715	0.361457	1.7747	4.4887	H2BC12;H2BC9;H2BC13;H2BC15;H2BC5;H2BC11;RNF181;H2BC17;RNF40;PEX14
Signaling by NOTCH4	12/72	16.67	0.0805319	0.361457	1.6685	4.2032	PSMD8;PSENEN;PSMB6;NOTCH1;PSMB5;JAG1;PSMC3;PSMC4;PSMD3;ADRM1;AKT1;PSMA7
Interleukin-17 Signaling	12/72	16.67	0.0805319	0.361457	1.6685	4.2032	MAP2K3;MAPK11;JUN;IRAK1;TNIP2;RPS6KA1;IKBKG;TAB1;VRK3;MAP2K7;IL17RC;MAPK3
Respiratory Electron Transport	23/158	14.56	0.0800082	0.361457	1.4227	3.5932	COX8A;NDUFA13;NDUFA7;NDUFB7;NDUFA11;UQCC3;PET100;NDUFB4;COX17;UQCR11;ETFB;ECSIT;COX5B;FOXRED1;PNKD;NDUFS8;NDUFS6;UQCRC1;CYC1;NDUFV1;SLC25A11;SLC25A22;RAB5IF
Factors Involved in Megakaryocyte Development and Platelet Production	23/158	14.56	0.0800082	0.361457	1.4227	3.5932	KIF22;GATA2;TUBB4B;TUBA4A;EHD1;KLC4;EHD2;TUBA1C;TUBB6;TUBB2B;KLC2;TUBB2A;PRKAR1B;TUBB3;MICAL1;MAFG;IRF1;MAFF;HMG20B;MAFK;KIF21B;KIF3C;SH2B1
Neurodegenerative Diseases	5/22	22.73	0.0791621	0.361457	2.4516	6.2179	PRDX2;JUN;CAPNS1;LMNA;CAPN1
Deregulated CDK5 Triggers Multiple Neurodegenerative Pathways in Alzheimer's Disease Models	5/22	22.73	0.0791621	0.361457	2.4516	6.2179	PRDX2;JUN;CAPNS1;LMNA;CAPN1
Host Interactions of HIV Factors	19/126	15.08	0.0795523	0.361457	1.4824	3.7524	SEC13;APOBEC3G;ADRM1;AP1B1;HMGA1;AP2A1;RANGAP1;AP2A2;PSMA7;PSMD8;PSMB6;PSMB5;PSMC3;PSMC4;PSMD3;AP1S1;ELOB;AP1M2;AP1M1
tRNA Modification in the Nucleus and Cytosol	8/43	18.6	0.0839056	0.363503	1.906	4.7232	QTRT1;TRMT112;CTU2;CTU1;PUS1;TRMT1;LAGE3;TRMT61A
RHOBTB3 ATPase Cycle	3/10	30	0.0831718	0.363503	3.571	8.8806	HGS;PLIN3;LRRC41
ABC Transporter Disorders	11/65	16.92	0.0840808	0.363503	1.6992	4.2072	PSMD8;PSMB6;ABCC2;PSMB5;ABCB6;PSMC3;PSMC4;PSMD3;ADRM1;ABCD1;PSMA7
p75NTR Signals via NF-kB	4/16	25	0.0841268	0.363503	2.778	6.8767	NFKBIA;NGFR;IRAK1;SQSTM1
Heme Degradation	4/16	25	0.0841268	0.363503	2.778	6.8767	ABCC2;SLCO2B1;BLVRB;HMOX1
EPHA-mediated Growth Cone Collapse	6/29	20.69	0.0835118	0.363503	2.1748	5.3994	EFNA3;MYL6;SRC;MYH14;MYH9;EPHA2
Downregulation of ERBB2 Signaling	6/29	20.69	0.0835118	0.363503	2.1748	5.3994	EGF;AKT2;CDC37;AKT1;NRG1;STUB1
p75NTR Regulates Axonogenesis	3/10	30	0.0831718	0.363503	3.571	8.8806	NGFR;MAG;ARHGDIA
Activation of the AP-1 Family of Transcription Factors	3/10	30	0.0831718	0.363503	3.571	8.8806	MAPK11;JUN;MAPK3
The Role of Nef in HIV-1 Replication and Disease Pathogenesis	6/29	20.69	0.0835118	0.363503	2.1748	5.3994	AP1B1;AP1S1;AP2A1;AP2A2;AP1M2;AP1M1
VEGFR2 Mediated Vascular Permeability	6/29	20.69	0.0835118	0.363503	2.1748	5.3994	PRR5;JUP;AKT2;MLST8;AKT1;TRIB3
Hh Mutants Are Degraded by ERAD	8/43	18.6	0.0839056	0.363503	1.906	4.7232	PSMB6;PSMD8;PSMB5;PSMC3;PSMC4;PSMD3;ADRM1;PSMA7
Aggrephagy	8/43	18.6	0.0839056	0.363503	1.906	4.7232	TUBA1C;TUBB6;TUBB2B;TUBB2A;TUBB3;HSF1;TUBB4B;TUBA4A
rRNA Processing in the Nucleus and Cytosol	28/199	14.07	0.0818497	0.363503	1.3678	3.4234	DDX49;RPLP1;RRP1;TSR3;NOC4L;SNORD3A;RPL8;RRP9;RPS15;RRP7A;TRMT112;EXOSC5;EXOSC4;RPL18A;RPS19;RPL36;DHX37;RPL35;RPLP2;RPL18;RPS10;WDR18;RPS5;BOP1;RPS28;TBL3;FAU;NOL12
Cytochrome P450 - Arranged by Substrate Type	11/65	16.92	0.0840808	0.363503	1.6992	4.2072	CYP27A1;CYP26A1;CYP26B1;POR;RXRA;TBXAS1;FDXR;FDX2;CYP1A1;CYP4F11;CYP19A1
RNA Polymerase III Transcription Initiation	7/36	19.44	0.0846223	0.363834	2.0125	4.9701	BRF2;GTF3C5;BRF1;SNAPC2;POLR2E;POLR2F;POLR2L
ROS and RNS Production in Phagocytes	7/36	19.44	0.0846223	0.363834	2.0125	4.9701	ATP6V0B;HVCN1;RAC2;CYBA;TCIRG1;ATP6V0C;ATP6V1F
Cyclin E Associated Events During G1 S Transition	12/73	16.44	0.0874313	0.374983	1.6411	3.9992	PSMD8;PSMB6;PSMB5;LIN37;PSMC3;PSMC4;AKT2;PSMD3;ADRM1;AKT1;E2F4;PSMA7
Interleukin-4 and Interleukin-13 Signaling	17/112	15.18	0.0890319	0.380908	1.4935	3.6123	OPRD1;CXCL8;LIF;TYK2;MMP9;BATF;VEGFA;IL1A;IL1B;PIM1;FSCN1;ITGAX;AKT1;HMOX1;TIMP1;IL13RA2;JUNB
Regulation of HMOX1 Expression and Activity	2/5	40	0.0922583	0.381706	5.5536	13.2351	HMOX1;MAFK
Synthesis of PI	2/5	40	0.0922583	0.381706	5.5536	13.2351	PITPNM1;PITPNM2
Threonine Catabolism	2/5	40	0.0922583	0.381706	5.5536	13.2351	SDSL;GCAT
Retinoid Metabolism and Transport	8/44	18.18	0.0933937	0.381706	1.853	4.3932	AKR1B10;GPC1;AKR1C1;AKR1C3;AGRN;LRP10;HSPG2;PLB1
RAF-independent MAPK1 3 Activation	5/23	21.74	0.0926233	0.381706	2.3153	5.5086	DUSP5;DUSP2;MAP2K2;TYK2;MAPK3
Bile Acid and Bile Salt Metabolism	8/44	18.18	0.0933937	0.381706	1.853	4.3932	ABCC3;CYP27A1;ACOT8;OSBPL7;RXRA;AKR1C1;AKR1C3;SLC51B
Activated TAK1 Mediates P38 MAPK Activation	5/23	21.74	0.0926233	0.381706	2.3153	5.5086	MAP2K3;MAPK11;IRAK1;IKBKG;TAB1
Synthesis of Bile Acids and Bile Salts via 7Alpha-Hydroxycholesterol	5/23	21.74	0.0926233	0.381706	2.3153	5.5086	CYP27A1;ACOT8;RXRA;AKR1C1;AKR1C3
Separation of Sister Chromatids	25/177	14.12	0.0925562	0.381706	1.3734	3.2687	PMF1;PSMA7;ANAPC11;PSMD8;PSMB6;TUBA1C;TUBB6;PSMB5;TUBB3;PSMD3;CENPT;SEC13;ADRM1;RANGAP1;TUBB4B;TUBA4A;TUBB2B;TUBB2A;PSMC3;UBE2S;PSMC4;CENPM;B9D2;MAD1L1;ANAPC2
Meiosis	14/89	15.73	0.0918826	0.381706	1.5575	3.718	H2BC9;SUN2;ACD;H2AC6;H2BC5;H2BC17;H2BC12;H2BC13;H2AC14;H2BC15;H2BC21;H2BC11;LMNA;H4C1
RNA Polymerase II Pre-transcription Events	13/81	16.05	0.0899783	0.381706	1.595	3.841	CTDP1;ELL;GTF2F1;ERCC2;POLR2E;POLR2F;ELOB;NELFB;TAF6;NELFA;POLR2I;POLR2J;POLR2L
Signaling by ROBO Receptors	29/210	13.81	0.0932387	0.381706	1.3383	3.1751	ROBO3;SRC;RPLP1;CXCR4;RPL8;PSMA7;PSMD8;RPS15;PSMB6;PSMB5;RPL18A;RPS19;GPC1;PSMD3;RPL36;ZSWIM8;RPL35;RPLP2;ELOB;RPL18;RPS10;PAK4;VASP;RPS5;ADRM1;RPS28;PSMC3;PSMC4;FAU
Stabilization of P53	8/44	18.18	0.0933937	0.381706	1.853	4.3932	PSMB6;PSMD8;PSMB5;PSMC3;PSMC4;PSMD3;ADRM1;PSMA7
NR1H2 & NR1H3 Regulate Gene Expression to Limit Cholesterol Uptake	2/5	40	0.0922583	0.381706	5.5536	13.2351	RXRA;NR1H2
Branched-chain Ketoacid Dehydrogenase Kinase Deficiency	2/5	40	0.0922583	0.381706	5.5536	13.2351	BCKDHA;BCKDK
Defective LFNG Causes SCDO3	2/5	40	0.0922583	0.381706	5.5536	13.2351	LFNG;NOTCH1
NR1H2 & NR1H3 Regulate Gene Expression Linked to Triglyceride Lipolysis in Adipose	2/5	40	0.0922583	0.381706	5.5536	13.2351	RXRA;NR1H2
IRF3 Mediated Activation of Type 1 IFN	2/5	40	0.0922583	0.381706	5.5536	13.2351	IRF3;NLRP4
Diseases of Base Excision Repair	2/5	40	0.0922583	0.381706	5.5536	13.2351	NTHL1;MUTYH
NOD1 2 Signaling Pathway	7/37	18.92	0.0951868	0.384191	1.9454	4.5753	MAPK11;IRAK1;IKBKG;TAB1;AAMP;MAPK12;BIRC3
Clathrin-mediated Endocytosis	21/145	14.48	0.0948672	0.384191	1.4138	3.3298	SGIP1;EGF;GPS1;CLTB;HIP1R;AP2A1;SYNJ2;AP2A2;ARFGAP1;DNM1;EPN1;SLC2A8;GAK;GRK2;BIN1;HGS;DNAJC6;PACSIN3;PIP5K1C;KIAA0319;SH3GL1
Glycolysis	12/74	16.22	0.0946852	0.384191	1.6145	3.8058	SEC13;PFKFB4;PFKL;TPI1;PKM;PGP;ENO1;ENO2;ALDOA;ENO3;GAPDH;PFKP
Iron Uptake and Transport	10/59	16.95	0.0957712	0.384191	1.7021	3.9927	ATP6V0B;HEPH;SLC22A17;FTH1;HMOX1;TCIRG1;MCOLN1;ATP6V0C;FTL;ATP6V1F
Regulation of RUNX2 Expression and Activity	10/59	16.95	0.0957712	0.384191	1.7021	3.9927	PSMD8;PSMB6;ESRRA;PSMB5;PSMC3;PSMC4;PSMD3;ADRM1;STUB1;PSMA7
HSF1-dependent Transactivation	7/37	18.92	0.0951868	0.384191	1.9454	4.5753	RPTOR;HSPB8;HSF1;AKT1S1;MLST8;CAMK2G;DEDD2
Formation of Paraxial Mesoderm	10/59	16.95	0.0957712	0.384191	1.7021	3.9927	LFNG;PSMD8;PSMB6;NOTCH1;PSMB5;PSMC3;PSMC4;PSMD3;ADRM1;PSMA7
Laminin Interactions	6/30	20	0.0953762	0.384191	2.084	4.8973	COL18A1;LAMB3;COL4A2;ITGA3;LAMB2;HSPG2
P75 NTR Receptor-Mediated Signalling	15/98	15.31	0.0997587	0.397208	1.5079	3.4757	PSENEN;NGFR;BAD;ARHGEF16;ARHGEF19;ARHGEF18;ARHGEF10L;TIAM2;NFKBIA;MAG;IRAK1;ARHGDIA;ARHGEF1;ARHGEF40;SQSTM1
COPI-independent Golgi-to-ER Retrograde Traffic	9/52	17.31	0.0997928	0.397208	1.7454	4.0225	TUBA1C;TUBB6;TUBB2B;TUBB2A;TUBB3;PLA2G6;TUBB4B;PAFAH1B3;TUBA4A
RIP-mediated NFkB Activation via ZBP1	4/17	23.53	0.101074	0.397208	2.5642	5.8768	NFKBIA;IKBKG;NFKB2;NFKBIB
KSRP (KHSRP) Binds and Destabilizes mRNA	4/17	23.53	0.101074	0.397208	2.5642	5.8768	MAPK11;EXOSC5;EXOSC4;AKT1
The NLRP3 Inflammasome	4/17	23.53	0.101074	0.397208	2.5642	5.8768	PYCARD;HMOX1;TXN;NFKB2
Formation of Senescence-Associated Heterochromatin Foci (SAHF)	4/17	23.53	0.101074	0.397208	2.5642	5.8768	H1-5;H1-4;HMGA1;H1-2
Trafficking of GluR2-containing AMPA Receptors	4/17	23.53	0.101074	0.397208	2.5642	5.8768	PRKCB;PICK1;AP2A1;AP2A2
Purine Catabolism	4/17	23.53	0.101074	0.397208	2.5642	5.8768	NT5C;NUDT1;NUDT18;DNPH1
IL-6-type Cytokine Receptor Ligand Interactions	4/17	23.53	0.101074	0.397208	2.5642	5.8768	IL11;CLCF1;LIF;TYK2
Regulation of Mitotic Cell Cycle	12/75	16	0.102294	0.39929	1.5888	3.6224	PSMD8;PSMB6;FZR1;PSMB5;PSMC3;PSMC4;UBE2S;PSMD3;ADRM1;PSMA7;ANAPC2;ANAPC11
Extra-nuclear Estrogen Signaling	12/75	16	0.102294	0.39929	1.5888	3.6224	PRMT1;SHC1;SRC;EGF;AKT2;SPHK1;SRF;GNB2;AKT1;MMP9;GNAI2;MAPK3
APC C-mediated Degradation of Cell Cycle Proteins	12/75	16	0.102294	0.39929	1.5888	3.6224	PSMD8;PSMB6;FZR1;PSMB5;PSMC3;PSMC4;UBE2S;PSMD3;ADRM1;PSMA7;ANAPC2;ANAPC11
Cell Cycle	80/649	12.33	0.10254	0.399355	1.1769	2.6805	CHTF18;PSMD8;BABAM1;TUBA1C;TUBB6;H2AC14;TUBB3;AKT2;RUVBL2;H2BC21;PSMD3;AKT1;MYBL2;TK1;H4C1;PIAS4;SUN2;SEC13;H2AC6;LIG1;PRKCB;CEP131;HAUS5;RANGAP1;LEMD2;H2BC17;SIRT2;TUBA4A;MZT2B;H2BC12;MZT2A;H2BC13;TUBB2B;MAU2;TUBB2A;H2BC15;H2BC11;MCM5;CHMP6;MAD1L1;ANAPC2;MCM2;LIN37;SRC;RAB1B;SSNA1;PMF1;PSMA7;ANAPC11;PSMB6;POLD4;FZR1;PSMB5;HAUS7;POLD1;LMNA;POLR2E;POLR2F;E2F4;POLR2I;POLR2J;POLR2L;MAPK3;CENPT;H2BC9…
GPER1 Signaling	8/45	17.78	0.103469	0.402069	1.8028	4.0896	GNAZ;PRKAR1B;SHC1;SRC;GNB2;ITGA5;ADCY7;GNAI2
Signaling by FGFR	14/91	15.38	0.105644	0.407785	1.5168	3.4094	SHC1;SRC;GTF2F1;FGFRL1;PTBP1;GIPC1;POLR2E;POLR2F;POLR2I;FGFR4;POLR2J;FGFR3;MAPK3;POLR2L
Type I Hemidesmosome Assembly	3/11	27.27	0.105567	0.407785	3.1245	7.0251	CD151;LAMB3;PLEC
RHO GTPases Activate KTN1	3/11	27.27	0.105567	0.407785	3.1245	7.0251	KLC4;KLC2;RHOG
Mitochondrial Fatty Acid Beta-Oxidation	7/38	18.42	0.106446	0.409969	1.8825	4.217	ACADVL;ACOT7;ECI1;ACOT11;ACOT13;ACADS;ACSF2
Rab Regulation of Trafficking	18/123	14.63	0.107068	0.410042	1.4306	3.1963	GDI1;RAB1B;HPS1;TRAPPC5;TSC2;DENND3;RAB11B;GGA1;TRAPPC6A;AKT2;AKT1;DENND6B;ULK1;SBF1;RIN1;TBC1D17;TBC1D10A;MON1A
Estrogen-dependent Nuclear Events Downstream of ESR-membrane Signaling	5/24	20.83	0.107173	0.410042	2.1933	4.8983	EGF;SRF;AKT2;AKT1;MAPK3
Transport of Inorganic Cations Anions and Amino Acids Oligopeptides	16/107	14.95	0.107005	0.410042	1.467	3.2787	SLC25A1;SLC12A4;SLC3A2;SLC4A2;SLC1A5;SLC7A11;SLC4A3;SLC8B1;SLC6A6;SLC7A5;SLC25A29;SLC26A11;SLC25A10;SLC25A11;SLC25A22;SLC26A6
Metalloprotease DUBs	6/31	19.35	0.108089	0.412637	2.0006	4.4509	BABAM1;H2AC11;H2AC12;H2AC14;H2AC6;H2AC21
Major Pathway of rRNA Processing in the Nucleolus and Cytosol	26/189	13.76	0.11077	0.421946	1.3318	2.9303	DDX49;RPLP1;RRP1;SNORD3A;NOC4L;RPL8;RRP9;RPS15;RRP7A;EXOSC5;EXOSC4;RPL18A;RPS19;RPL36;DHX37;RPL35;RPLP2;RPL18;RPS10;RPS5;WDR18;BOP1;RPS28;TBL3;FAU;NOL12
Metabolism of Amino Acids and Derivatives	46/358	12.85	0.112137	0.426217	1.2322	2.6962	RPLP1;SLC3A2;RPL8;SDSL;OAZ1;PSMA7;PSMD8;RPS15;PSMB6;PSMB5;RPL18A;RPS19;KYNU;PSMD3;RPL36;RPL35;RPLP2;ASL;RIMKLA;RPL18;RPS10;GAMT;MPST;BCKDHA;SMOX;GPT2;RPS5;TXNRD1;GSR;ADRM1;FAH;GCAT;ALDH4A1;BCKDK;SLC7A5;GRHPR;RPS28;PSMC3;TST;PSMC4;KYAT1;SLC25A10;FAU;NAGS;SERINC2;BCAT2
Nuclear Events (Kinase and Transcription Factor Activation)	10/61	16.39	0.113596	0.429603	1.6351	3.5566	FOSL1;MAPK11;VGF;SRF;RPS6KA1;ID1;ID3;VRK3;JUNB;MAPK3
Nucleotide Excision Repair	16/108	14.81	0.113769	0.429603	1.451	3.1539	INO80E;LIG1;ELL;GPS1;MCRS1;RAD23A;POLD4;XAB2;POLD1;ERCC1;ERCC2;POLR2E;POLR2F;POLR2I;POLR2J;POLR2L
Gamma Carboxylation, Hypusinylation, Hydroxylation, and Arylsulfatase Activation	10/61	16.39	0.113596	0.429603	1.6351	3.5566	ARSA;JMJD4;ARSL;U2AF2;DRG2;FURIN;DOHH;RPL8;JMJD7;GAS6
Hh Mutants Abrogate Ligand Secretion	8/46	17.39	0.114122	0.429999	1.7552	3.8097	PSMB6;PSMD8;PSMB5;PSMC3;PSMC4;PSMD3;ADRM1;PSMA7
Platelet Aggregation (Plug Formation)	7/39	17.95	0.118383	0.44482	1.8236	3.8912	VWF;SHC1;SRC;AKT1;CSK;ADRA2C;BCAR1
G2 M DNA Damage Checkpoint	12/77	15.58	0.118568	0.44482	1.5398	3.2832	BABAM1;PIAS4;H2BC12;H2BC9;H2BC13;H2BC15;H2BC5;H2BC21;H2BC11;H4C1;H2BC17;RAD9A
Crosslinking of Collagen Fibrils	4/18	22.22	0.119449	0.44716	2.3809	5.059	BMP1;COL4A2;LOXL1;LOXL2
COPI-mediated Anterograde Transport	15/101	14.85	0.120858	0.451464	1.455	3.0747	NAPA;RAB1B;TUBB4B;TUBA4A;ARFGAP1;SPTA1;TUBA1C;TUBB6;TUBB2B;TUBB2A;TMEM115;TUBB3;COPE;ARF5;CD55
HIV Life Cycle	22/158	13.92	0.121797	0.453994	1.3501	2.8425	SEC13;CTDP1;LIG1;ELL;HMGA1;CXCR4;FURIN;GTF2F1;RANGAP1;ERCC2;MVB12A;POLR2E;POLR2F;ELOB;NELFB;TAF6;NELFA;CHMP6;POLR2I;POLR2J;VPS28;POLR2L
Degradation of GLI1 by the Proteasome	8/47	17.02	0.125341	0.45431	1.7101	3.5515	PSMB6;PSMD8;PSMB5;PSMC3;PSMC4;PSMD3;ADRM1;PSMA7
TRAF6 Mediated NF-kB Activation	5/25	20	0.122762	0.45431	2.0835	4.3702	NFKBIA;TRAF2;IKBKG;NFKB2;NFKBIB
Inflammasomes	5/25	20	0.122762	0.45431	2.0835	4.3702	PYCARD;HMOX1;TXN;NLRP1;NFKB2
Defective Intrinsic Pathway for Apoptosis	5/25	20	0.122762	0.45431	2.0835	4.3702	PRDX2;JUN;CAPNS1;LMNA;CAPN1
RNA Polymerase II Transcription Initiation	8/47	17.02	0.125341	0.45431	1.7101	3.5515	ERCC2;POLR2E;POLR2F;TAF6;POLR2I;GTF2F1;POLR2J;POLR2L
RNA Polymerase II Promoter Escape	8/47	17.02	0.125341	0.45431	1.7101	3.5515	ERCC2;POLR2E;POLR2F;TAF6;POLR2I;GTF2F1;POLR2J;POLR2L
RNA Polymerase II HIV Promoter Escape	8/47	17.02	0.125341	0.45431	1.7101	3.5515	ERCC2;POLR2E;POLR2F;TAF6;POLR2I;GTF2F1;POLR2J;POLR2L
HIV Transcription Initiation	8/47	17.02	0.125341	0.45431	1.7101	3.5515	ERCC2;POLR2E;POLR2F;TAF6;POLR2I;GTF2F1;POLR2J;POLR2L
GLI3 Is Processed to GLI3R by the Proteasome	8/47	17.02	0.125341	0.45431	1.7101	3.5515	PSMB6;PSMD8;PSMB5;PSMC3;PSMC4;PSMD3;ADRM1;PSMA7
Degradation of GLI2 by the Proteasome	8/47	17.02	0.125341	0.45431	1.7101	3.5515	PSMB6;PSMD8;PSMB5;PSMC3;PSMC4;PSMD3;ADRM1;PSMA7
RNA Polymerase II Transcription Pre-Initiation And Promoter Opening	8/47	17.02	0.125341	0.45431	1.7101	3.5515	ERCC2;POLR2E;POLR2F;TAF6;POLR2I;GTF2F1;POLR2J;POLR2L
RNA Polymerase II Transcription Initiation And Promoter Clearance	8/47	17.02	0.125341	0.45431	1.7101	3.5515	ERCC2;POLR2E;POLR2F;TAF6;POLR2I;GTF2F1;POLR2J;POLR2L
Gene Silencing by RNA	19/134	14.18	0.125543	0.45431	1.3786	2.8608	H2BC9;SEC13;H2AC6;H2BC5;H2BC17;TARBP2;H2BC12;H2BC13;H2AC14;H2BC15;H2BC21;H2BC11;POLR2E;DGCR8;POLR2F;H4C1;POLR2I;POLR2J;POLR2L
Gap-filling DNA Repair Synthesis and Ligation in TC-NER	10/62	16.13	0.123162	0.45431	1.6036	3.3583	POLD4;XAB2;LIG1;POLD1;ERCC2;POLR2E;POLR2F;POLR2I;POLR2J;POLR2L
Transcriptional Regulation by RUNX3	13/86	15.12	0.12812	0.45449	1.4853	3.052	NOTCH1;JAG1;SRC;ADRM1;PSMA7;PSMD8;PSMB6;PSMB5;PSMC3;PSMC4;PSMD3;SPP1;TEAD3
Protein Repair	2/6	33.33	0.128789	0.45449	4.165	8.5364	TXN;MSRB1
Signaling by TGF-beta Receptor Complex	14/94	14.89	0.128482	0.45449	1.4597	2.9953	PPP1R15A;SERPINE1;LTBP4;ARHGEF18;FURIN;LTBP2;LTBP3;PPP1CA;SMAD7;STUB1;E2F4;JUNB;MAPK3;UBE2M
SARS-CoV-2 Modulates Host Translation Machinery	9/55	16.36	0.130041	0.45449	1.6313	3.3276	RPS15;RPS28;RPS19;SNRPD2;RPS5;GEMIN4;FAU;RPS10;SNRPB
Synthesis of 15-Eicosatetraenoic Acid Derivatives	2/6	33.33	0.128789	0.45449	4.165	8.5364	GPX1;GPX4
Synthesis of Dolichyl-phosphate	2/6	33.33	0.128789	0.45449	4.165	8.5364	DOLPP1;MVD
Pregnenolone Biosynthesis	3/12	25	0.130005	0.45449	2.7772	5.6659	FDX2;FDXR;TSPO
Killing Mechanisms	3/12	25	0.130005	0.45449	2.7772	5.6659	JUN;DVL1;CYBA
GP1b-IX-V Activation Signalling	3/12	25	0.130005	0.45449	2.7772	5.6659	VWF;SRC;FLNA
WNT5 FZD7-mediated Leishmania Damping	3/12	25	0.130005	0.45449	2.7772	5.6659	JUN;DVL1;CYBA
Proton-coupled Monocarboxylate Transport	2/6	33.33	0.128789	0.45449	4.165	8.5364	BSG;SLC16A3
Sulfide Oxidation to Sulfate	2/6	33.33	0.128789	0.45449	4.165	8.5364	TST;SLC25A10
Maturation of Spike Protein 9683686	2/6	33.33	0.128789	0.45449	4.165	8.5364	PRKCSH;MOGS
CLEC7A Inflammasome Pathway	2/6	33.33	0.128789	0.45449	4.165	8.5364	PYCARD;IL1B
Vitamins	2/6	33.33	0.128789	0.45449	4.165	8.5364	CYP26A1;CYP26B1
Negative Feedback Regulation of MAPK Pathway	2/6	33.33	0.128789	0.45449	4.165	8.5364	MAP2K2;MAPK3
Recruitment of NuMA to Mitotic Centrosomes	14/94	14.89	0.128482	0.45449	1.4597	2.9953	SSNA1;CEP131;HAUS5;TUBB4B;TUBA4A;MZT2B;TUBA1C;MZT2A;TUBB6;TUBB2B;TUBB2A;TUBB3;HAUS7;TUBGCP6
MAP2K and MAPK Activation	7/40	17.5	0.130981	0.456854	1.7682	3.5942	MAP2K2;VWF;SRC;WDR83;CSK;LAMTOR2;MAPK3
Golgi-to-ER Retrograde Transport	19/135	14.07	0.132216	0.46024	1.3667	2.7652	NAPA;RAB1B;KIF22;PLA2G6;TUBB4B;TUBA4A;ARFGAP1;KLC4;TUBA1C;TUBB6;TUBB2B;KLC2;TUBB2A;TUBB3;KIF21B;KIF3C;PAFAH1B3;COPE;ARF5
Signaling by FGFR in Disease	10/63	15.87	0.133154	0.461653	1.5732	3.172	BCR;MYO18A;POLR2E;POLR2F;GTF2F1;POLR2I;FGFR4;POLR2J;FGFR3;POLR2L
Dual Incision in TC-NER	10/63	15.87	0.133154	0.461653	1.5732	3.172	POLD4;XAB2;POLD1;ERCC1;ERCC2;POLR2E;POLR2F;POLR2I;POLR2J;POLR2L
Reproduction	18/127	14.17	0.13349	0.461898	1.3778	2.7745	CATSPER1;H2BC9;SUN2;ACD;H2AC6;H2BC5;HVCN1;CXCR4;H2BC17;H2BC12;H2BC13;H2AC14;H2BC15;H2BC21;H2BC11;LMNA;ZP1;H4C1
Cell Junction Organization	17/119	14.29	0.134618	0.464873	1.3904	2.7883	VASP;CADM3;CD151;JUP;LAMB3;FBLIM1;ACTN1;TESK1;ILK;MOV10;CLDN4;CDH24;FLNA;FLNC;NECTIN2;PLEC;NECTIN1
Amino Acid Transport Across the Plasma Membrane	6/33	18.18	0.135943	0.465747	1.8522	3.696	SLC6A6;SLC7A5;SLC25A29;SLC3A2;SLC1A5;SLC7A11
Cristae Formation	6/33	18.18	0.135943	0.465747	1.8522	3.696	MTX1;TMEM11;CHCHD6;MICOS13;ATP5F1D;ATP5F1E
Synthesis of Bile Acids and Bile Salts	6/33	18.18	0.135943	0.465747	1.8522	3.696	CYP27A1;ACOT8;OSBPL7;RXRA;AKR1C1;AKR1C3
FGFR2 Mutant Receptor Activation	6/33	18.18	0.135943	0.465747	1.8522	3.696	POLR2E;POLR2F;POLR2I;GTF2F1;POLR2J;POLR2L
Defective CFTR Causes Cystic Fibrosis	8/48	16.67	0.137112	0.466989	1.6673	3.3128	PSMB6;PSMD8;PSMB5;PSMC3;PSMC4;PSMD3;ADRM1;PSMA7
Metabolism of Fat-Soluble Vitamins	8/48	16.67	0.137112	0.466989	1.6673	3.3128	AKR1B10;GPC1;AKR1C1;AKR1C3;AGRN;LRP10;HSPG2;PLB1
Signaling by WNT	37/287	12.89	0.136715	0.466989	1.236	2.4595	CLTB;LRP5;AP2A1;AP2A2;PSMA7;PSMD8;PSMB6;PORCN;H2AC14;PSMB5;AKT2;H2BC21;PSMD3;DVL1;RAC2;AKT1;RAC3;H4C1;BCL9L;H2BC9;H2BC5;H2AC6;PRKCB;ADRM1;AXIN1;H2BC17;TLE5;H2BC12;MOV10;H2BC13;H2BC15;PSMC3;PSMC4;GNB2;HECW1;H2BC11;CSNK1G2
VEGFR2 Mediated Cell Proliferation	4/19	21.05	0.139135	0.46722	2.222	4.3825	PRKCB;SRC;SPHK1;VEGFA
Scavenging by Class A Receptors	4/19	21.05	0.139135	0.46722	2.222	4.3825	SCARA5;COL4A2;FTH1;FTL
Glycosphingolipid Biosynthesis	4/19	21.05	0.139135	0.46722	2.222	4.3825	B4GALNT1;A4GALT;ST3GAL3;ST6GALNAC6
Processive Synthesis on the C-strand of the Telomere	4/19	21.05	0.139135	0.46722	2.222	4.3825	POLD4;ACD;LIG1;POLD1
Endogenous Sterols	5/26	19.23	0.139332	0.46722	1.9842	3.9107	CYP27A1;RXRA;FDXR;FDX2;CYP19A1
Attachment and Entry 9694614	5/26	19.23	0.139332	0.46722	1.9842	3.9107	CTSL;GPC1;FURIN;AGRN;HSPG2
Biosynthesis of Specialized Proresolving Mediators (SPMs)	4/19	21.05	0.139135	0.46722	2.222	4.3825	GSTM4;GPX4;CYP1A1;PTGR1
Ephrin Signaling	4/19	21.05	0.139135	0.46722	2.222	4.3825	EFNB2;SRC;EPHB4;GIT1
RNA Polymerase III Transcription	7/41	17.07	0.144213	0.480803	1.7161	3.3232	BRF2;GTF3C5;BRF1;SNAPC2;POLR2E;POLR2F;POLR2L
RNA Polymerase III Abortive And Retractive Initiation	7/41	17.07	0.144213	0.480803	1.7161	3.3232	BRF2;GTF3C5;BRF1;SNAPC2;POLR2E;POLR2F;POLR2L
MET Promotes Cell Motility	7/41	17.07	0.144213	0.480803	1.7161	3.3232	COL27A1;COL24A1;LAMB3;SRC;ITGA3;LAMB2;COL5A3
MAPK6 MAPK4 Signaling	12/80	15	0.145567	0.483461	1.4716	2.8359	PSMD8;PSMB6;MOV10;JUN;PSMB5;PSMC3;PSMC4;PSMD3;ADRM1;CDC42EP2;PSMA7;MAPK4
PKR-mediated Signaling	12/80	15	0.145567	0.483461	1.4716	2.8359	TUBA1C;TUBB6;TUBB2B;TUBB2A;TUBB3;SPHK1;IKBKG;TUBB4B;FAAP20;TUBA4A;TARBP2;FAAP100
Neurotransmitter Receptors and Postsynaptic Signal Transmission	27/204	13.24	0.146982	0.487229	1.2732	2.4413	SRC;CHRNA6;AP2A1;AP2A2;KIF17;ADCY7;LIN7B;CAMKK1;PPM1F;GNAI2;TUBA1C;TUBB6;TUBB3;RPS6KA1;CAMK2G;GIT1;MAPK3;PRKCB;KCNJ12;NRG1;TUBB4B;TUBA4A;TUBB2B;TUBB2A;PRKAR1B;GNB2;PICK1
Mitotic Anaphase	29/221	13.12	0.147452	0.487856	1.2608	2.4135	PMF1;PSMA7;ANAPC11;PSMD8;PSMB6;TUBA1C;TUBB6;PSMB5;TUBB3;PSMD3;LMNA;CENPT;SEC13;ADRM1;TUBB4B;RANGAP1;LEMD2;SIRT2;TUBA4A;TUBB2B;TUBB2A;PSMC3;PSMC4;UBE2S;CENPM;B9D2;CHMP6;MAD1L1;ANAPC2
Diseases of Carbohydrate Metabolism	6/34	17.65	0.151014	0.498691	1.7859	3.3761	G6PC3;GBE1;DCXR;GAA;TALDO1;SGSH
Immune System	245/2150	11.4	0.152421	0.502382	1.0796	2.0309	ICAM3;KEAP1;IFI35;IFI30;PSMD8;MT2A;AKT2;FTH1;RPS6KA1;PSMD3;AKT1;AP1S1;FBXO6;JUNB;FAAP100;ARSA;PRKCB;IL1R1;AP1B1;TALDO1;UNC13D;SIGIRR;RNF126;CDC34;CRISPLD2;HECW2;ORAI1;TRIB3;RBCK1;TRIM11;STX1A;NLRX1;TXN;PLA2G6;ANAPC11;TRPM2;SYNGR1;HMOX1;VASP;JUN;JUP;STK11IP;LIF;NBEAL2;BST2;TNFSF9;PYGB;CD40;AP2A1;ECSIT;AP2A2;MRC2;TUBA1C;CTSL;TRIM3;RAC2;FCER1A;ELOB;QSOX1;TIMP1;IKBKG;IKBKE;CTSD;CD53;IL11;SEC13;ATP6V0…
Mitochondrial Protein Import	10/65	15.38	0.154377	0.502406	1.5159	2.8322	CHCHD5;TOMM40;MTX1;IDH3G;COX17;TIMM13;TIMM17B;CYC1;ACO2;GFER
Hedgehog 'On' State	11/73	15.07	0.155167	0.502406	1.4793	2.7563	PSMD8;PSMB6;GRK2;PSMB5;PSMC3;PSMC4;PSMD3;ADRM1;IQCE;KIF7;PSMA7
Synthesis of Bile Acids and Bile Salts via 24-Hydroxycholesterol	3/13	23.08	0.156188	0.502406	2.4993	4.6404	CYP27A1;AKR1C1;AKR1C3
Apoptosis Induced DNA Fragmentation	3/13	23.08	0.156188	0.502406	2.4993	4.6404	H1-5;H1-4;H1-2
Synthesis of PE	3/13	23.08	0.156188	0.502406	2.4993	4.6404	CHKB;ETNK2;LPIN3
Downregulation of ERBB2 ERBB3 Signaling	3/13	23.08	0.156188	0.502406	2.4993	4.6404	AKT2;AKT1;NRG1
Dissolution of Fibrin Clot	3/13	23.08	0.156188	0.502406	2.4993	4.6404	SERPINB2;SERPINE1;PLAUR
Mitotic Metaphase and Anaphase	29/222	13.06	0.153145	0.502406	1.2542	2.3533	PMF1;PSMA7;ANAPC11;PSMD8;PSMB6;TUBA1C;TUBB6;PSMB5;TUBB3;PSMD3;LMNA;CENPT;SEC13;ADRM1;TUBB4B;RANGAP1;LEMD2;SIRT2;TUBA4A;TUBB2B;TUBB2A;PSMC3;PSMC4;UBE2S;CENPM;B9D2;CHMP6;MAD1L1;ANAPC2
ER to Golgi Anterograde Transport	21/155	13.55	0.155968	0.502406	1.3075	2.4295	NAPA;SEC13;RAB1B;TRAPPC5;TUBB4B;TUBA4A;ARFGAP1;SPTA1;TUBA1C;TUBB6;TRAPPC6A;TUBB2B;TUBB2A;TMEM115;TUBB3;PPP6R1;LMAN2;PREB;COPE;ARF5;CD55
Mitochondrial Biogenesis	14/97	14.43	0.153895	0.502406	1.4067	2.6326	ESRRA;CRTC2;ALAS1;SMARCD3;MTX1;MICOS13;POLRMT;ATP5F1D;ATP5F1E;MAPK12;MAPK11;RXRA;TMEM11;CHCHD6
WNT5A-dependent Internalization of FZD2, FZD5 and ROR2	3/13	23.08	0.156188	0.502406	2.4993	4.6404	CLTB;AP2A1;AP2A2
RNA Polymerase II Transcribes snRNA Genes	12/81	14.81	0.155235	0.502406	1.4502	2.7014	RNU12;ELL;INTS1;SNAPC2;POLR2E;INTS5;POLR2F;TAF6;GTF2F1;POLR2I;POLR2J;POLR2L
p75NTR Recruits Signalling Complexes	3/13	23.08	0.156188	0.502406	2.4993	4.6404	NGFR;IRAK1;SQSTM1
RNA Polymerase III Transcription Initiation From Type 2 Promoter	5/27	18.52	0.156817	0.502567	1.8939	3.5088	GTF3C5;BRF1;POLR2E;POLR2F;POLR2L
Pyroptosis	5/27	18.52	0.156817	0.502567	1.8939	3.5088	IL1A;IL1B;IRF1;BAX;CHMP6
Class I Peroxisomal Membrane Protein Import	4/20	20	0.160008	0.507179	2.083	3.8172	PEX16;FIS1;ABCD1;PEX14
Aberrant Regulation of Mitotic Exit in Cancer Due to RB1 Defects	4/20	20	0.160008	0.507179	2.083	3.8172	FZR1;UBE2S;ANAPC11;ANAPC2
Receptor-type Tyrosine-Protein Phosphatases	4/20	20	0.160008	0.507179	2.083	3.8172	PTPRS;IL1RAPL1;PPFIA4;PPFIA3
Defective B4GALT7 Causes EDS, Progeroid Type	4/20	20	0.160008	0.507179	2.083	3.8172	GPC1;AGRN;HSPG2;B4GALT7
Defective B3GAT3 Causes JDSSDHD	4/20	20	0.160008	0.507179	2.083	3.8172	B3GAT3;GPC1;AGRN;HSPG2
Conversion From APC C Cdc20 to APC C Cdh1 in Late Anaphase	4/20	20	0.160008	0.507179	2.083	3.8172	FZR1;UBE2S;ANAPC11;ANAPC2
mRNA Splicing	28/215	13.02	0.162024	0.508668	1.2496	2.2743	SF3B5;PRKRIP1;PQBP1;U2AF1L4;PTBP1;SART1;RNU12;SNRPD2;U2AF2;ZMAT5;POLR2E;POLR2F;POLR2I;POLR2J;RBM10;POLR2L;SF3A2;PPIL2;CCDC12;ALYREF;GTF2F1;XAB2;LSM7;PRPF6;RBM42;CACTIN;SNRPB;FAM50A
RHO GTPases Activate Formins	19/139	13.67	0.160912	0.508668	1.3208	2.413	CENPT;SEC13;SRC;SRF;RANGAP1;RHOC;TUBB4B;PMF1;TUBA4A;RHOB;TUBA1C;TUBB6;TUBB2B;TUBB2A;TUBB3;DVL1;CENPM;B9D2;MAD1L1
SCF(Skp2)-mediated Degradation of P27 P21	8/50	16	0.162235	0.508668	1.5877	2.8876	PSMD8;PSMB6;PSMB5;PSMC3;PSMC4;PSMD3;ADRM1;PSMA7
Chondroitin Sulfate Dermatan Sulfate Metabolism	8/50	16	0.162235	0.508668	1.5877	2.8876	CHPF;CHPF2;B3GAT3;GPC1;XYLT2;AGRN;HSPG2;B4GALT7
Response of EIF2AK4 (GCN2) to Amino Acid Deficiency	15/106	14.15	0.161327	0.508668	1.3747	2.5079	CEBPB;RPS5;RPLP1;RPL8;RPS15;RPS28;RPL18A;RPS19;RPL36;RPL35;RPLP2;TRIB3;FAU;RPL18;RPS10
Signaling by ERBB2	8/50	16	0.162235	0.508668	1.5877	2.8876	SHC1;SRC;EGF;AKT2;CDC37;AKT1;NRG1;STUB1
Metabolism of Lipids	90/758	11.87	0.162887	0.508972	1.1268	2.0448	ACADVL;ALAS1;ECI1;TECR;FHL2;MED16;PLB1;SMPD4;SIN3B;FDXR;TSPO;GGT1;SBF1;A4GALT;ACADS;ABCD1;PIAS4;ABCC3;ARSA;CBR1;ACOT8;ACOT7;GPX1;MIGA2;DGAT1;GPX4;SPHK2;SPHK1;ACOT11;ACOT13;MED27;PTGR1;SLC51B;CYP27A1;TIAM2;PITPNM1;PITPNM2;FDX2;PLIN3;TRIB3;MVD;ACOX3;PLPP2;CSNK1G2;ST6GALNAC6;PTGES;SMARCD3;ABHD4;GPS2;PLA2G6;CYP19A1;AGPAT2;PLD3;PTGS1;RXRA;ARSL;ALDH3B1;PSAP;SCAP;GPAT3;B4GALNT1;PIP5K1C;ST3GAL3;GSTM4;ESR…
Eukaryotic Translation Termination	14/98	14.29	0.162918	0.508972	1.3899	2.5219	RPS5;RPLP1;RPL8;RPS15;TRMT112;RPS28;RPL18A;RPS19;RPL36;RPL35;RPLP2;FAU;RPL18;RPS10
Vitamin B2 (Riboflavin) Metabolism	2/7	28.57	0.167928	0.511738	3.3318	5.9446	SLC52A2;ACP5
Glycosphingolipid Metabolism	9/58	15.52	0.164547	0.511738	1.5311	2.763	ARSA;SMPD4;ARSL;PSAP;B4GALNT1;A4GALT;GLA;ST6GALNAC6;ST3GAL3
CDH11 Homotypic and Heterotypic Interactions	2/7	28.57	0.167928	0.511738	3.3318	5.9446	JUP;CDH24
Constitutive Signaling by NOTCH1 t(7;9)(NOTCH1 M1580 K2555) Translocation Mutant	2/7	28.57	0.167928	0.511738	3.3318	5.9446	JAG1;NOTCH1
Acyl Chain Remodeling of DAG and TAG	2/7	28.57	0.167928	0.511738	3.3318	5.9446	DGAT1;PNPLA2
Attachment of GPI Anchor to uPAR	2/7	28.57	0.167928	0.511738	3.3318	5.9446	GPAA1;PLAUR
Phosphate Bond Hydrolysis by NUDT Proteins	2/7	28.57	0.167928	0.511738	3.3318	5.9446	NUDT1;NUDT18
RSK Activation	2/7	28.57	0.167928	0.511738	3.3318	5.9446	RPS6KA1;MAPK3
Activation of RAC1 Downstream of NMDARs	2/7	28.57	0.167928	0.511738	3.3318	5.9446	CAMKK1;GIT1
Activated NTRK2 Signals Through FYN	2/7	28.57	0.167928	0.511738	3.3318	5.9446	BDNF;SRC
RHOC GTPase Cycle	11/74	14.86	0.165728	0.511738	1.4557	2.6166	BCR;RTKN;JUP;PKN3;ARHGDIA;MCAM;ARHGEF10L;ARHGEF1;PKN1;ARHGEF40;RHOC
RAB GEFs Exchange GTP for GDP on RABs	13/90	14.44	0.164246	0.511738	1.4078	2.5431	GDI1;RAB1B;HPS1;TRAPPC5;DENND3;TRAPPC6A;AKT2;AKT1;DENND6B;ULK1;SBF1;RIN1;MON1A
Signaling by NOTCH1 t(7;9)(NOTCH1 M1580 K2555) Translocation Mutant	2/7	28.57	0.167928	0.511738	3.3318	5.9446	JAG1;NOTCH1
Synthesis of 12-Eicosatetraenoic Acid Derivatives	2/7	28.57	0.167928	0.511738	3.3318	5.9446	GPX1;GPX4
Hemostasis	84/707	11.88	0.170694	0.519256	1.1273	1.993	LGALS3BP;ECM1;DGKD;SERPINE1;SLC7A11;CLU;TUBA1C;TUBB6;TUBB3;BSG;ITGAX;RAC2;AKT1;HMG20B;QSOX1;TIMP1;KIF21B;SLC16A3;CHID1;SRGN;SERPINB2;VWF;PRKCB;ITGA3;ACTN1;RHOG;PLAUR;ACTN4;KIF22;GTPBP2;ADRA2C;TUBA4A;RHOB;SLC7A5;TUBB2B;MAG;TUBB2A;PRKAR1B;DGKQ;IRF1;ORAI1;PICK1;TAGLN2;ITGA5;GAS6;DAGLB;ALDOA;SHC1;SRC;TEX264;PDGFA;SLC3A2;GATA2;GNAI2;KLC4;KLC2;MICAL1;GPC1;GNA11;PSAP;FLNA;CSK;KIF3C;AAMP;SH2B1;MAPK3;PPIL…
Vesicle-mediated Transport	89/752	11.84	0.172423	0.523598	1.1225	1.9731	GDI1;CLTB;AP2A1;AP2A2;SLC2A8;TUBA1C;TUBB6;TUBB3;PPP6R1;AKT2;FTH1;AKT1;AP1S1;KIF21B;SBF1;TBC1D10A;SH3GL1;SEC13;SCARA5;SGIP1;AP1B1;TSC2;KIF22;TUBA4A;ARFGAP1;DNM1;EPN1;GAK;TUBB2B;TRAPPC6A;GJD3;TUBB2A;RAB36;COL4A2;BIN1;DNAJC6;HGS;PLIN3;MYH9;PREB;ULK1;DENND6B;NAA38;RIN1;CHMP6;PAFAH1B3;VPS28;ARF5;FTL;NAPA;SRC;GPS1;RAB1B;DENND3;PLA2G6;STX10;SPTA1;ARFRP1;GGA1;KLC4;CYTH2;KLC2;GRK2;VPS51;BLOC1S1;LMAN2;MVB1…
Influenza Viral RNA Transcription and Replication	20/149	13.42	0.173372	0.525561	1.2933	2.2662	SEC13;RPS5;RPLP1;RPL8;GTF2F1;RPS15;RPS28;RPL18A;RPS19;RPL36;POLR2E;RPL35;RPLP2;POLR2F;FAU;POLR2I;RPL18;RPS10;POLR2J;POLR2L
RNA Polymerase III Transcription Initiation From Type 1 Promoter	5/28	17.86	0.175143	0.528454	1.8115	3.1558	GTF3C5;BRF1;POLR2E;POLR2F;POLR2L
Asymmetric Localization of PCP Proteins	8/51	15.69	0.175543	0.528454	1.5507	2.698	PSMD8;PSMB6;PSMB5;PSMC3;PSMC4;PSMD3;ADRM1;PSMA7
RNA Polymerase III Transcription Initiation From Type 3 Promoter	5/28	17.86	0.175143	0.528454	1.8115	3.1558	BRF2;SNAPC2;POLR2E;POLR2F;POLR2L
Formation of TC-NER Pre-Incision Complex	8/51	15.69	0.175543	0.528454	1.5507	2.698	XAB2;GPS1;ERCC2;POLR2E;POLR2F;POLR2I;POLR2J;POLR2L
NRAGE Signals Death Through JNK	9/59	15.25	0.176927	0.530782	1.5004	2.5988	TIAM2;NGFR;BAD;ARHGEF16;ARHGEF19;ARHGEF18;ARHGEF10L;ARHGEF1;ARHGEF40
RHOQ GTPase Cycle	9/59	15.25	0.176927	0.530782	1.5004	2.5988	PLEKHG3;ARHGAP33;SYDE1;JUP;CDC42EP2;CDC42EP1;SLC1A5;GIT1;PAK4
Mismatch Repair (MMR) Directed by MSH2 MSH6 (MutSalpha)	3/14	21.43	0.183816	0.539339	2.272	3.8483	POLD4;LIG1;POLD1
Defective EXT1 Causes Exostoses 1, TRPS2 and CHDS	3/14	21.43	0.183816	0.539339	2.272	3.8483	GPC1;AGRN;HSPG2
Regulation of TP53 Activity Through Association With Co-factors	3/14	21.43	0.183816	0.539339	2.272	3.8483	AKT2;AKT1;BANP
SMAD2 SMAD3 SMAD4 Heterotrimer Regulates Transcription	6/36	16.67	0.183224	0.539339	1.6667	2.8284	SERPINE1;FURIN;E2F4;JUNB;MAPK3;SMAD7
Signal Transduction by L1	4/21	19.05	0.181933	0.539339	1.9604	3.3407	MAP2K2;ITGA5;L1CAM;MAPK3
Innate Immune System	133/1149	11.58	0.180782	0.539339	1.0956	1.874	GHDC;CD81;ICAM3;CLU;PSMD8;PYCARD;FTH1;PSMD3;RPS6KA1;TOM1;CAPN1;MAP2K3;ARSA;DGAT1;CYBA;ATAD3B;VRK3;UNC13D;SIGIRR;CDC34;CRISPLD2;FTL;NLRX1;SHC1;HVCN1;LY96;TXN;PLA2G6;PLD3;CNN2;NCKIPSD;TRPM2;SYNGR1;DPP7;IRAK1;ALDH3B1;NLRP4;PSAP;HMOX1;NLRP1;MAP2K7;TXNDC5;AP1M1;ATP6V1F;JUN;JUP;STK11IP;NBEAL2;NFKB2;BST2;NFKBIA;PIN1;MAN2B1;TAB1;MAP3K14;LAT;UBE2M;NFKBIB;PYGB;PRKCSH;TCIRG1;ECSIT;AP2A2;CTSL;ITGAX;RAC2;FCER…
G2 M Transition	24/184	13.04	0.181934	0.539339	1.2514	2.1326	LIN37;SSNA1;CEP131;ADRM1;HAUS5;TUBB4B;TUBA4A;PSMA7;PSMD8;MZT2B;PSMB6;TUBA1C;MZT2A;TUBB6;TUBB2B;TUBB2A;PSMB5;PSMC3;TUBB3;HAUS7;PSMC4;PSMD3;TUBGCP6;MYBL2
Defective EXT2 Causes Exostoses 2	3/14	21.43	0.183816	0.539339	2.272	3.8483	GPC1;AGRN;HSPG2
Nonsense Mediated Decay (NMD) Independent of the Exon Junction Complex (EJC)	14/100	14	0.181755	0.539339	1.3574	2.3145	UPF1;RPS5;RPLP1;RPL8;RPS15;RPS28;RPL18A;RPS19;RPL36;RPL35;RPLP2;FAU;RPL18;RPS10
Heme Biosynthesis	3/14	21.43	0.183816	0.539339	2.272	3.8483	ALAS1;FECH;UROD
IRAK1 Recruits IKK Complex	3/14	21.43	0.183816	0.539339	2.272	3.8483	IRAK1;PELI3;IKBKG
IRAK1 Recruits IKK Complex Upon TLR7 8 or 9 Stimulation	3/14	21.43	0.183816	0.539339	2.272	3.8483	IRAK1;PELI3;IKBKG
Mismatch Repair (MMR) Directed by MSH2 MSH3 (MutSbeta)	3/14	21.43	0.183816	0.539339	2.272	3.8483	POLD4;LIG1;POLD1
Cell Death Signalling via NRAGE, NRIF and NADE	11/76	14.47	0.187863	0.547514	1.4108	2.3589	PSENEN;TIAM2;NGFR;BAD;ARHGEF16;ARHGEF19;ARHGEF18;ARHGEF10L;ARHGEF1;ARHGEF40;SQSTM1
ECM Proteoglycans	11/76	14.47	0.187863	0.547514	1.4108	2.3589	PTPRS;COL4A2;LAMB2;COL6A2;COL5A3;SERPINE1;COL6A1;ITGAX;COL9A3;AGRN;HSPG2
TP53 Regulates Transcription of Cell Death Genes	7/44	15.91	0.187433	0.547514	1.5767	2.6399	PRELID1;AIFM2;PMAIP1;BAX;NDRG1;RABGGTA;BBC3
Disease	241/2131	11.31	0.187596	0.547514	1.0692	1.7893	HDAC11;SERPINE1;KEAP1;ENO1;RPL8;RPS15;PSMD8;H2AC11;H2AC12;H2AC14;CAPNS1;SNRPD2;TRIM28;RPL18A;RPS19;AKT2;BSG;PSMD3;FDXR;RPL36;AKT1;AP1S1;RPL35;H4C1;RPS10;JUNB;VPS18;IL1R1;AP1B1;TALDO1;MOGS;HSPG2;BCR;CYP27A1;PRKAR1B;CDC37;MAP1B;FDX2;VPS28;STX1A;ABCB6;PDGFA;TXN;ANAPC11;ADAMTS15;PRDX2;NTHL1;HMOX1;ST3GAL3;VPS16;JUN;JAG1;APOBEC3G;BST2;PARP10;MOV10;RPS28;TCN2;H2AC21;ADA;CD320;ELL;GBE1;RPLP1;AP2A1;MED16;…
MAPK1 MAPK3 Signaling	34/271	12.55	0.188623	0.548807	1.1973	1.9971	SHC1;SRC;PDGFA;ARL2;WDR83;PSMA7;PSMD8;PSMB6;SPTA1;PSMB5;PSMD3;CSK;RCE1;RALGDS;CAMK2G;MAPK3;PDGFRB;DUSP5;DUSP2;MAP2K2;VWF;EGF;ADRM1;NRG1;TYK2;MAPK12;PSMC3;PSMC4;ABHD17A;LAMTOR2;FGFR4;FGFR3;LAT;MAP3K11
Hedgehog Ligand Biogenesis	8/52	15.38	0.189316	0.548984	1.5154	2.5221	PSMD8;PSMB6;PSMB5;PSMC3;PSMC4;PSMD3;ADRM1;PSMA7
Complex I Biogenesis	10/68	14.71	0.189127	0.548984	1.4372	2.3934	NDUFA13;NDUFA7;NDUFS8;NDUFB7;NDUFA11;NDUFS6;NDUFB4;ECSIT;NDUFV1;FOXRED1
Cellular Responses to Mechanical Stimuli	13/93	13.98	0.194375	0.559915	1.3548	2.2191	PRR5;ADCY7;NFKBIA;CAPNS1;PRKAR1B;GNA11;GNB2;MLST8;AKT1;PIEZO1;IKBKG;ITGA5;IKBKE
Energy Dependent Regulation of mTOR by LKB1-AMPK	5/29	17.24	0.194233	0.559915	1.7359	2.8446	RPTOR;MLST8;TSC2;LAMTOR2;LAMTOR4
Response of Endothelial Cells to Shear Stress	13/93	13.98	0.194375	0.559915	1.3548	2.2191	PRR5;ADCY7;NFKBIA;CAPNS1;PRKAR1B;GNA11;GNB2;MLST8;AKT1;PIEZO1;IKBKG;ITGA5;IKBKE
PIWI-interacting RNA (piRNA) Biogenesis	5/29	17.24	0.194233	0.559915	1.7359	2.8446	POLR2E;POLR2F;POLR2I;POLR2J;POLR2L
Negative Regulation of the PI3K AKT Network	16/118	13.56	0.194741	0.560041	1.308	2.14	PDGFRB;BDNF;SRC;EGF;RHOG;PDGFA;NRG1;IRAK1;AKT2;RAC2;AKT1;TRIB3;PIP5K1C;FGFR4;FGFR3;MAPK3
Mitotic G2-G2 M Phases	24/186	12.9	0.196321	0.563651	1.2358	2.0119	LIN37;SSNA1;CEP131;ADRM1;HAUS5;TUBB4B;TUBA4A;PSMA7;PSMD8;MZT2B;PSMB6;TUBA1C;MZT2A;TUBB6;TUBB2B;TUBB2A;PSMB5;PSMC3;TUBB3;HAUS7;PSMC4;PSMD3;TUBGCP6;MYBL2
Signaling by ERBB2 TMD JMD Mutants	4/22	18.18	0.204771	0.569634	1.8514	2.936	EGF;SHC1;CDC37;NRG1
ERK MAPK Targets	4/22	18.18	0.204771	0.569634	1.8514	2.936	MAPK11;RPS6KA1;VRK3;MAPK3
JNK (c-Jun Kinases) Phosphorylation and Activation Mediated by Activated Human TAK1	4/22	18.18	0.204771	0.569634	1.8514	2.936	IRAK1;IKBKG;TAB1;MAP2K7
Epigenetic Regulation of Gene Expression	36/291	12.37	0.204102	0.569634	1.1781	1.8722	SMARCD3;SUV39H1;CXXC1;GPS2;SGF29;MED16;AGPAT2;H2AC14;RXRA;TRIM28;SIN3B;TAF1C;BCL7C;H2BC21;DPF1;POLR2E;POLR2F;H4C1;POLR2L;H2BC9;MBD3;H2BC5;H2AC6;MCRS1;MED27;H2BC17;SPOCD1;H2BC12;H2BC13;H2BC15;MYO1C;TADA3;H2BC11;ERCC2;ZNF534;PNPLA2
RAF MAP Kinase Cascade	33/265	12.45	0.204963	0.569634	1.1869	1.8811	SHC1;SRC;PDGFA;ARL2;WDR83;PSMA7;PSMD8;PSMB6;SPTA1;PSMB5;PSMD3;CSK;RCE1;RALGDS;CAMK2G;MAPK3;PDGFRB;DUSP5;DUSP2;MAP2K2;VWF;EGF;ADRM1;NRG1;MAPK12;PSMC3;PSMC4;ABHD17A;LAMTOR2;FGFR4;FGFR3;LAT;MAP3K11
mRNA Splicing - Major Pathway	26/204	12.75	0.202316	0.569634	1.2185	1.9471	SF3B5;PRKRIP1;PQBP1;U2AF1L4;PTBP1;SART1;SNRPD2;U2AF2;POLR2E;POLR2F;POLR2I;POLR2J;RBM10;POLR2L;SF3A2;PPIL2;CCDC12;ALYREF;GTF2F1;XAB2;LSM7;PRPF6;RBM42;CACTIN;SNRPB;FAM50A
Intra-Golgi and Retrograde Golgi-to-ER Traffic	26/204	12.75	0.202316	0.569634	1.2185	1.9471	NAPA;RAB1B;PLA2G6;STX10;TUBA1C;ARFRP1;KLC4;CYTH2;TUBB6;KLC2;VPS51;TUBB3;KIF21B;KIF3C;KIF22;TUBB4B;TUBA4A;ARFGAP1;TUBB2B;TUBB2A;RAB36;PLIN3;NAA38;PAFAH1B3;ARF5;COPE
Signaling by RAS Mutants	7/45	15.56	0.2029	0.569634	1.5351	2.4486	MAP2K2;VWF;SRC;CSK;CAMK2G;MAP3K11;MAPK3
Paradoxical Activation of RAF Signaling by Kinase Inactive BRAF	7/45	15.56	0.2029	0.569634	1.5351	2.4486	MAP2K2;VWF;SRC;CSK;CAMK2G;MAP3K11;MAPK3
RHOH GTPase Cycle	6/37	16.22	0.200263	0.569634	1.6128	2.5936	JUP;ARHGDIA;CSK;SLC1A5;DBN1;PAK4
Gene and Protein Expression by JAK-STAT Signaling After Interleukin-12 Stimulation	6/37	16.22	0.200263	0.569634	1.6128	2.5936	CNN2;SERPINB2;STAT4;AIP;TALDO1;LCP1
Peptide Chain Elongation	13/94	13.83	0.20495	0.569634	1.338	2.1207	RPLP1;RPS5;RPL8;RPS15;RPS28;RPL18A;RPS19;RPL36;RPL35;RPLP2;FAU;RPL18;RPS10
Regulated Necrosis	9/61	14.75	0.202889	0.569634	1.4426	2.301	IL1A;CDC37;IL1B;IRF1;BAX;TRAF2;STUB1;CHMP6;BIRC3
p53-Dependent G1 S DNA Damage Checkpoint	8/53	15.09	0.203526	0.569634	1.4816	2.3587	PSMD8;PSMB6;PSMB5;PSMC3;PSMC4;PSMD3;ADRM1;PSMA7
p53-Dependent G1 DNA Damage Response	8/53	15.09	0.203526	0.569634	1.4816	2.3587	PSMD8;PSMB6;PSMB5;PSMC3;PSMC4;PSMD3;ADRM1;PSMA7
Signaling by EGFR	8/53	15.09	0.203526	0.569634	1.4816	2.3587	HGS;SHC1;SRC;EGF;CSK;AAMP;EPN1;SH3GL1
Nuclear Receptor Transcription Pathway	8/53	15.09	0.203526	0.569634	1.4816	2.3587	ESRRA;NR4A1;RXRA;NR1H2;RARA;NR0B1;NR2C2AP;NR2F6
Signaling Downstream of RAS Mutants	7/45	15.56	0.2029	0.569634	1.5351	2.4486	MAP2K2;VWF;SRC;CSK;CAMK2G;MAP3K11;MAPK3
Signaling by Moderate Kinase Activity BRAF Mutants	7/45	15.56	0.2029	0.569634	1.5351	2.4486	MAP2K2;VWF;SRC;CSK;CAMK2G;MAP3K11;MAPK3
Cellular Hexose Transport	4/22	18.18	0.204771	0.569634	1.8514	2.936	SLC45A3;SLC2A1;SLC2A6;SLC2A8
Regulation of NFE2L2 Gene Expression	2/8	25	0.208695	0.570751	2.7763	4.3502	NOTCH1;MAFK
Regulation of Cytoskeletal Remodeling and Cell Spreading by IPP Complex Components	2/8	25	0.208695	0.570751	2.7763	4.3502	ACTN1;TESK1
Synthesis of UDP-N-acetyl-glucosamine	2/8	25	0.208695	0.570751	2.7763	4.3502	AMDHD2;RENBP
CREB1 Phosphorylation Through the Activation of CaMKII CaMKK CaMKIV Cascasde	2/8	25	0.208695	0.570751	2.7763	4.3502	CAMK2G;CAMKK1
Glycosphingolipid Transport	2/8	25	0.208695	0.570751	2.7763	4.3502	CLN3;CPTP
NFE2L2 Regulating MDR Associated Enzymes	2/8	25	0.208695	0.570751	2.7763	4.3502	ABCC3;MAFK
Nef Mediated CD8 Down-regulation	2/8	25	0.208695	0.570751	2.7763	4.3502	AP2A1;AP2A2
POLB-Dependent Long Patch Base Excision Repair	2/8	25	0.208695	0.570751	2.7763	4.3502	LIG1;ADPRS
Degradation of Cysteine and Homocysteine	3/15	20	0.212594	0.570751	2.0825	3.2245	MPST;TST;SLC25A10
Mismatch Repair	3/15	20	0.212594	0.570751	2.0825	3.2245	POLD4;LIG1;POLD1
Processive Synthesis on the Lagging Strand	3/15	20	0.212594	0.570751	2.0825	3.2245	POLD4;LIG1;POLD1
Anchoring Fibril Formation	3/15	20	0.212594	0.570751	2.0825	3.2245	BMP1;LAMB3;COL4A2
Transport of RCbl Within the Body	2/8	25	0.208695	0.570751	2.7763	4.3502	TCN2;CD320
p130Cas Linkage to MAPK Signaling for Integrins	3/15	20	0.212594	0.570751	2.0825	3.2245	VWF;SRC;BCAR1
Response of EIF2AK1 (HRI) to Heme Deficiency	3/15	20	0.212594	0.570751	2.0825	3.2245	PPP1R15A;CEBPB;TRIB3
Constitutive Signaling by EGFRvIII	3/15	20	0.212594	0.570751	2.0825	3.2245	EGF;SHC1;CDC37
Constitutive Signaling by NOTCH1 HD Domain Mutants	3/15	20	0.212594	0.570751	2.0825	3.2245	JAG1;NOTCH1;MIB2
Glycerophospholipid Biosynthesis	17/128	13.28	0.209357	0.570751	1.277	1.9969	MIGA2;CHKB;DGAT1;ABHD4;OSBPL5;STARD10;PLA2G6;AGPAT2;PLB1;PLD3;PITPNM1;ETNK2;PITPNM2;PEMT;GPAT3;LPIN3;PNPLA2
Signaling by NOTCH1 HD Domain Mutants in Cancer	3/15	20	0.212594	0.570751	2.0825	3.2245	JAG1;NOTCH1;MIB2
Activation of BAD and Translocation to Mitochondria	3/15	20	0.212594	0.570751	2.0825	3.2245	BAD;AKT2;AKT1
Signaling by EGFRvIII in Cancer	3/15	20	0.212594	0.570751	2.0825	3.2245	EGF;SHC1;CDC37
Late Phase of HIV Life Cycle	19/145	13.1	0.209647	0.570751	1.2575	1.9646	SEC13;CTDP1;ELL;FURIN;GTF2F1;RANGAP1;ERCC2;MVB12A;POLR2E;POLR2F;ELOB;NELFB;TAF6;NELFA;CHMP6;POLR2I;POLR2J;VPS28;POLR2L
Activation of BH3-only Proteins	5/30	16.67	0.214005	0.571887	1.6664	2.5691	BAD;AKT2;AKT1;PMAIP1;BBC3
Insulin Receptor Recycling	5/30	16.67	0.214005	0.571887	1.6664	2.5691	ATP6V0B;TCIRG1;CTSD;ATP6V0C;ATP6V1F
Paracetamol ADME	5/30	16.67	0.214005	0.571887	1.6664	2.5691	SULT1A1;ABCC3;ABCC2;GSTP1;GGT1
Diseases of Glycosylation	19/146	13.01	0.218382	0.582687	1.2475	1.8981	NOTCH1;B3GAT3;POMT1;ALG12;MOGS;MUC5B;HSPG2;ADAMTS4;LFNG;DPM2;ADAMTS15;DPM3;GALE;GPC1;AGRN;B4GALT7;MPDU1;ST3GAL3;GALK1
Interleukin-12 Signaling	7/46	15.22	0.218834	0.582998	1.4957	2.2726	CNN2;SERPINB2;STAT4;AIP;TALDO1;TYK2;LCP1
Metabolism of Vitamins and Cofactors	25/198	12.63	0.221672	0.589655	1.2053	1.8158	SLC2A1;NADSYN1;PPCDC;PLB1;GPC1;FPGS;AKT1;ACP5;SLC19A1;NADK;AKR1C1;SLC52A2;AKR1C3;MTHFS;HSPG2;PARP10;COQ4;AKR1B10;PC;TCN2;SLC25A19;COQ8B;AGRN;LRP10;CD320
G1 S Transition	16/121	13.22	0.22336	0.593236	1.2704	1.9043	CDT1;LIN37;ADRM1;PSMA7;PSMD8;PSMB6;PSMB5;PSMC3;PSMC4;AKT2;PSMD3;AKT1;MCM5;TK1;E2F4;MCM2
Antigen processing-Cross Presentation	13/96	13.54	0.226837	0.601551	1.3056	1.9369	ADRM1;LY96;CYBA;PSMA7;MRC2;PSMD8;PSMB6;PSMB5;PSMC3;CTSL;PSMC4;PSMD3;IKBKG
Dopamine Neurotransmitter Release Cycle	4/23	17.39	0.228381	0.604722	1.7538	2.59	LIN7B;PPFIA4;PPFIA3;STX1A
Aerobic Respiration and Respiratory Electron Transport	32/260	12.31	0.229205	0.605981	1.1708	1.7248	NDUFA13;NDUFB7;NDUFA11;NDUFB4;COX17;UQCR11;ETFB;ECSIT;COX5B;FOXRED1;RMND5B;D2HGDH;CYC1;NDUFV1;SLC25A22;RAB5IF;COX8A;NDUFA7;PET100;UQCC3;IDH3G;ATP5F1D;ATP5F1E;PNKD;NDUFS8;PKM;PC;NDUFS6;UQCRC1;ACO2;HAGH;SLC25A11
rRNA Modification in the Nucleus and Cytosol	9/63	14.29	0.230307	0.607968	1.389	2.0395	RRP7A;TRMT112;TBL3;DDX49;TSR3;DHX37;NOC4L;SNORD3A;RRP9
RAC2 GTPase Cycle	12/88	13.64	0.231327	0.609735	1.3161	1.9266	BCR;SYDE1;MTX1;ARHGDIA;MCAM;RAC2;CDC42EP1;CYBA;GIT1;DEF6;EPHA2;PAK4
Regulation of RAS by GAPs	8/55	14.55	0.233141	0.610354	1.4184	2.0654	PSMD8;PSMB6;PSMB5;PSMC3;PSMC4;PSMD3;ADRM1;PSMA7
Transferrin Endocytosis and Recycling	5/31	16.13	0.234373	0.610354	1.6022	2.3245	ATP6V0B;TCIRG1;MCOLN1;ATP6V0C;ATP6V1F
Mitotic G1 Phase and G1 S Transition	18/139	12.95	0.232465	0.610354	1.2403	1.8096	CDT1;LIN37;SRC;ADRM1;PSMA7;PSMD8;PSMB6;PSMB5;PSMC3;PSMC4;AKT2;PSMD3;AKT1;MYBL2;MCM5;TK1;E2F4;MCM2
Glutamate Binding, Activation of AMPA Receptors and Synaptic Plasticity	5/31	16.13	0.234373	0.610354	1.6022	2.3245	PRKCB;PICK1;AP2A1;AP2A2;CAMK2G
Activated NOTCH1 Transmits Signal to the Nucleus	5/31	16.13	0.234373	0.610354	1.6022	2.3245	PSENEN;NOTCH1;JAG1;DNER;MIB2
Trafficking of AMPA Receptors	5/31	16.13	0.234373	0.610354	1.6022	2.3245	PRKCB;PICK1;AP2A1;AP2A2;CAMK2G
MAPK Targets Nuclear Events Mediated by MAP Kinases	5/31	16.13	0.234373	0.610354	1.6022	2.3245	MAPK11;JUN;RPS6KA1;VRK3;MAPK3
G1 S DNA Damage Checkpoints	8/55	14.55	0.233141	0.610354	1.4184	2.0654	PSMD8;PSMB6;PSMB5;PSMC3;PSMC4;PSMD3;ADRM1;PSMA7
Mitophagy	6/39	15.38	0.23594	0.610894	1.5149	2.1878	PINK1;TOMM40;SRC;ATG9A;ULK1;SQSTM1
Heme Signaling	7/47	14.89	0.235195	0.610894	1.4582	2.1105	RAI1;CRTC2;SMARCD3;RXRA;LY96;HMOX1;MAFK
Cell Cycle Checkpoints	32/261	12.26	0.235987	0.610894	1.1657	1.6832	PMF1;PSMA7;ANAPC11;PSMD8;BABAM1;PSMB6;PSMB5;H2BC21;PSMD3;H4C1;CENPT;H2BC9;PIAS4;SEC13;H2BC5;ADRM1;RANGAP1;H2BC17;H2BC12;H2BC13;H2BC15;PSMC3;PSMC4;UBE2S;H2BC11;CENPM;MCM5;B9D2;MAD1L1;ANAPC2;RAD9A;MCM2
NGF-stimulated Transcription	6/39	15.38	0.23594	0.610894	1.5149	2.1878	FOSL1;VGF;SRF;ID1;ID3;JUNB
MAPK Family Signaling Cascades	38/314	12.1	0.237391	0.613614	1.1487	1.6519	SHC1;SRC;PDGFA;ARL2;WDR83;PSMA7;PSMD8;PSMB6;SPTA1;PSMB5;PSMD3;CSK;RCE1;RALGDS;CAMK2G;MAPK4;MAPK3;PDGFRB;DUSP5;JUN;DUSP2;MAP2K2;VWF;EGF;ADRM1;NRG1;TYK2;MAPK12;MOV10;PSMC3;PSMC4;ABHD17A;CDC42EP2;LAMTOR2;FGFR4;FGFR3;LAT;MAP3K11
Mitochondrial Protein Degradation	13/97	13.4	0.238126	0.614598	1.29	1.8511	NDUFA13;PRELID1;ALAS1;FECH;ECI1;ECH1;MRPS2;MRPL12;COX5B;CLPP;LONP1;ACO2;NDUFV1
Glycogen Storage Diseases	3/16	18.75	0.24224	0.617873	1.9222	2.7254	G6PC3;GAA;GBE1
Sema3A PAK Dependent Axon Repulsion	3/16	18.75	0.24224	0.617873	1.9222	2.7254	FES;LIMK1;PLXNA3
NRIF Signals Cell Death From the Nucleus	3/16	18.75	0.24224	0.617873	1.9222	2.7254	PSENEN;NGFR;SQSTM1
Transcription of E2F Targets Under Neg Control by P107 (RBL1) and P130 (RBL2) in Complex With HDAC1	3/16	18.75	0.24224	0.617873	1.9222	2.7254	LIN37;MYBL2;E2F4
VLDLR Internalisation and Degradation	3/16	18.75	0.24224	0.617873	1.9222	2.7254	NR1H2;AP2A1;AP2A2
Degradation of Beta-Catenin by the Destruction Complex	10/72	13.89	0.24023	0.617873	1.3442	1.917	PSMD8;PSMB6;PSMB5;PSMC3;PSMC4;PSMD3;ADRM1;AXIN1;PSMA7;TLE5
Signaling by ERBB2 ECD Mutants	3/16	18.75	0.24224	0.617873	1.9222	2.7254	EGF;SHC1;CDC37
Organelle Biogenesis and Maintenance	36/297	12.12	0.24145	0.617873	1.1507	1.6352	DYNC2I2;CRTC2;ALAS1;SMARCD3;SSNA1;FBF1;MICOS13;KIF17;PKD1;TUBA1C;TUBB6;RXRA;TUBB3;HAUS7;CHCHD6;NPHP4;KIF3C;ESRRA;MTX1;IFT140;CEP131;HAUS5;TUBB4B;POLRMT;ATP5F1D;ATP5F1E;TUBA4A;MAPK12;MAPK11;TUBB2B;TUBB2A;TMEM11;IFT27;B9D1;B9D2;DYNLRB1
Formation of a Pool of Free 40S Subunits	14/106	13.21	0.244012	0.62148	1.2684	1.7892	RPS5;RPLP1;RPL8;RPS15;RPS28;RPL18A;RPS19;RPL36;EIF3G;RPL35;RPLP2;FAU;RPL18;RPS10
Cytosolic Sensors of Pathogen-Associated DNA	9/64	14.06	0.244501	0.621813	1.3636	1.9207	NFKBIA;IRF3;NLRP4;POLR2E;POLR2F;IKBKG;POLR2L;NFKB2;NFKBIB
Synthesis of 5-Eicosatetraenoic Acids	2/9	22.22	0.250292	0.626451	2.3796	3.296	GPX1;GPX4
NR1H2 & NR1H3 Regulate Gene Expression to Control Bile Acid Homeostasis	2/9	22.22	0.250292	0.626451	2.3796	3.296	RXRA;NR1H2
NR1H2 & NR1H3 Regulate Gene Expression Linked to Lipogenesis	2/9	22.22	0.250292	0.626451	2.3796	3.296	RXRA;NR1H2
MAPK1 (ERK2) Activation	2/9	22.22	0.250292	0.626451	2.3796	3.296	MAP2K2;TYK2
Sperm Motility And Taxes	2/9	22.22	0.250292	0.626451	2.3796	3.296	CATSPER1;HVCN1
Atorvastatin ADME	2/9	22.22	0.250292	0.626451	2.3796	3.296	ABCC2;SLCO2B1
Malate-aspartate Shuttle	2/9	22.22	0.250292	0.626451	2.3796	3.296	SLC25A11;SLC25A22
Activated NTRK2 Signals Through RAS	2/9	22.22	0.250292	0.626451	2.3796	3.296	BDNF;SHC1
Multifunctional Anion Exchangers	2/9	22.22	0.250292	0.626451	2.3796	3.296	SLC26A11;SLC26A6
Interleukin-23 Signaling	2/9	22.22	0.250292	0.626451	2.3796	3.296	STAT4;TYK2
Selenocysteine Synthesis	13/98	13.27	0.249628	0.626451	1.2747	1.7691	RPS5;RPLP1;RPL8;RPS15;RPS28;RPL18A;RPS19;RPL36;RPL35;RPLP2;FAU;RPL18;RPS10
G Alpha (Z) Signalling Events	7/48	14.58	0.251941	0.629563	1.4226	1.9611	RGS4;GNAZ;PRKCB;GNB2;ADRA2C;ADCY7;GNAI2
Interleukin-6 Family Signaling	4/24	16.67	0.252622	0.629563	1.666	2.2922	IL11;CLCF1;LIF;TYK2
HS-GAG Degradation	4/24	16.67	0.252622	0.629563	1.666	2.2922	GPC1;AGRN;HSPG2;SGSH
RHOU GTPase Cycle	6/40	15	0.254462	0.63069	1.4703	2.0122	SRC;HGS;WDR6;GIT1;PAK4;EPHA2
DNA Strand Elongation	5/32	15.62	0.255253	0.63069	1.5427	2.1066	POLD4;LIG1;POLD1;MCM5;MCM2
Sphingolipid Metabolism	14/107	13.08	0.255126	0.63069	1.2547	1.714	ARSA;SPHK2;SPHK1;SMPD4;ARSL;ALDH3B1;PSAP;B4GALNT1;A4GALT;PLPP2;GLA;CSNK1G2;ST3GAL3;ST6GALNAC6
Nuclear Signaling by ERBB4	5/32	15.62	0.255253	0.63069	1.5427	2.1066	PSENEN;SRC;NRG1;ADAP1;MXD4
Respiratory Syncytial Virus (RSV) Attachment and Entry	5/32	15.62	0.255253	0.63069	1.5427	2.1066	GPC1;LY96;FURIN;AGRN;HSPG2
Thrombin Signalling Through Proteinase Activated Receptors (PARs)	5/32	15.62	0.255253	0.63069	1.5427	2.1066	SRC;GNA11;GNB2;F2RL2;MAPK3
Viral Infection Pathways	117/1029	11.37	0.260325	0.642309	1.0718	1.4425	SERPINE1;KEAP1;RPL8;COMT;PSMD8;H2AC11;PYCARD;RPS15;H2AC12;TUBB6;H2AC14;SNRPD2;TRIM28;RPL18A;RPS19;TUBB3;AKT2;PSMD3;RPL36;AKT1;AP1S1;RPL35;H4C1;RPS10;VPS18;H2AC6;LIG1;IL1R1;RPS5;AP1B1;MOGS;GTF2F1;HSPG2;TUBA4A;BRMS1;MAP1B;GEMIN4;VPS28;SNRPB;LY96;IRAK1;AP1M2;ST3GAL3;VPS16;AP1M1;APOBEC3G;HMGA1;BST2;PARP10;NFKBIA;RPS28;H2AC21;TAB1;ELL;PRKCSH;RPLP1;AP2A1;MED16;AP2A2;TUBA1C;CTSL;H2BC21;CHMP1A;RPLP2;HMG2…
Eukaryotic Translation Elongation	13/99	13.13	0.261331	0.643058	1.2599	1.6907	RPS5;RPLP1;RPL8;RPS15;RPS28;RPL18A;RPS19;RPL36;RPL35;RPLP2;FAU;RPL18;RPS10
Signaling by Insulin Receptor	11/82	13.41	0.26137	0.643058	1.2911	1.7325	ATP6V0B;SHC1;AKT2;TRIB3;TCIRG1;FGFR4;CTSD;ATP6V0C;FGFR3;ATP6V1F;MAPK3
Heparan Sulfate Heparin (HS-GAG) Metabolism	8/57	14.04	0.264138	0.64895	1.3604	1.811	B3GAT3;GPC1;XYLT2;AGRN;HS6ST1;HSPG2;B4GALT7;SGSH
Transport to the Golgi and Subsequent Modification	23/186	12.37	0.26543	0.651203	1.1764	1.5604	NAPA;SEC13;ST8SIA2;RAB1B;TRAPPC5;TUBB4B;TUBA4A;ARFGAP1;SPTA1;TUBA1C;TUBB6;TRAPPC6A;TUBB2B;TUBB2A;TMEM115;TUBB3;PPP6R1;LMAN2;MGAT4B;PREB;COPE;ARF5;CD55
SARS-CoV-1 Modulates Host Translation Machinery	6/41	14.63	0.273362	0.655841	1.4282	1.8523	RPS15;RPS28;RPS19;RPS5;FAU;RPS10
Biological Oxidations	27/222	12.16	0.272568	0.655841	1.1545	1.5007	MTARC1;GSTP1;COMT;CYP19A1;PTGS1;SULT1A1;TRMT112;CYP26B1;RXRA;FDXR;GGT1;SULT1A2;CBR3;GSTM4;GSTM3;NQO2;SMOX;EPHX1;AIP;CYP4F11;CYP27A1;CYP26A1;POR;TBXAS1;FDX2;CYP1A1;GCLM
Beta-catenin Independent WNT Signaling	17/134	12.69	0.267794	0.655841	1.2111	1.5957	PRKCB;ADRM1;CLTB;AP2A1;AP2A2;PSMA7;PSMD8;PSMB6;MOV10;PSMB5;PSMC3;PSMC4;GNB2;PSMD3;DVL1;RAC2;RAC3
Diseases Associated With Glycosaminoglycan Metabolism	6/41	14.63	0.273362	0.655841	1.4282	1.8523	B3GAT3;GPC1;AGRN;HSPG2;B4GALT7;ST3GAL3
Viral Messenger RNA Synthesis	7/49	14.29	0.269029	0.655841	1.3886	1.8231	SEC13;POLR2E;POLR2F;GTF2F1;POLR2I;POLR2J;POLR2L
Signaling by Activin	3/17	17.65	0.27249	0.655841	1.7848	2.3205	DRAP1;FSTL3;MAPK3
Removal of the Flap Intermediate From the C-strand	3/17	17.65	0.27249	0.655841	1.7848	2.3205	POLD4;ACD;POLD1
Regulation of MITF-M-dependent Genes Involved in Lysosome Biogenesis and Autophagy	3/17	17.65	0.27249	0.655841	1.7848	2.3205	ATP6V0B;ATP6V0C;ATP6V1F
Transcriptional Regulation by VENTX	6/41	14.63	0.273362	0.655841	1.4282	1.8523	MOV10;CEBPB;FZR1;UBE2S;ANAPC11;ANAPC2
Signaling by RAF1 Mutants	6/41	14.63	0.273362	0.655841	1.4282	1.8523	MAP2K2;VWF;SRC;CSK;CAMK2G;MAPK3
Signaling by TGFBR3	7/49	14.29	0.269029	0.655841	1.3886	1.8231	PSENEN;MOV10;RXRA;GIPC1;RARA;TIMP1;KLF16
Acetylcholine Neurotransmitter Release Cycle	3/17	17.65	0.27249	0.655841	1.7848	2.3205	PPFIA4;PPFIA3;STX1A
Metabolism of Folate and Pterines	3/17	17.65	0.27249	0.655841	1.7848	2.3205	FPGS;MTHFS;SLC19A1
Biosynthesis of DHA-derived SPMs	3/17	17.65	0.27249	0.655841	1.7848	2.3205	GSTM4;GPX4;CYP1A1
GAB1 Signalosome	3/17	17.65	0.27249	0.655841	1.7848	2.3205	EGF;SRC;CSK
Butyrate Response Factor 1 (BRF1) Binds and Destabilizes mRNA	3/17	17.65	0.27249	0.655841	1.7848	2.3205	EXOSC5;EXOSC4;AKT1
Complex III Assembly	4/25	16	0.277358	0.657616	1.5866	2.0348	UQCC3;UQCRC1;UQCR11;CYC1
Resolution of AP Sites via the Multiple-Nucleotide Patch Replacement Pathway	4/25	16	0.277358	0.657616	1.5866	2.0348	POLD4;LIG1;POLD1;ADPRS
NOTCH3 Activation and Transmission of Signal to the Nucleus	4/25	16	0.277358	0.657616	1.5866	2.0348	PSENEN;JAG1;EGF;MIB2
Signaling by ERBB2 KD Mutants	4/25	16	0.277358	0.657616	1.5866	2.0348	SHC1;EGF;CDC37;NRG1
NOTCH2 Activation and Transmission of Signal to the Nucleus	4/25	16	0.277358	0.657616	1.5866	2.0348	PSENEN;JAG1;MDK;MIB2
Maternal to Zygotic Transition (MZT)	14/109	12.84	0.277887	0.657616	1.2282	1.5727	H2BC9;KDM4B;H2AC6;H2BC5;TUBB4B;H2BC17;H2BC12;H2BC13;H2AC14;H2BC15;H2BC21;H2BC11;TNKS1BP1;H4C1
Signal Amplification	5/33	15.15	0.276558	0.657616	1.4876	1.912	SRC;GNA11;GNB2;AAMP;GNAI2
Metabolism of RNA	87/761	11.43	0.276686	0.657616	1.0776	1.3846	DDX49;RPLP1;RRP1;RPL8;RRP9;PQBP1;LSM10;PSMD8;EDC4;RPS15;TRMT112;PTBP1;SART1;RPL18A;RPS19;SNRPD2;FASTK;PSMD3;RPL36;AKT1;RPL35;RPLP2;TNKS1BP1;RPS10;UPF1;SEC13;RPS5;PUS1;GTF2F1;THOC6;QTRT1;CTU2;CTU1;DDX39A;GPRC5A;PRPF6;GEMIN4;CACTIN;SNRPB;SF3B5;PRKRIP1;TSR3;NOC4L;SNORD3A;LAGE3;PSMA7;TBRG4;U2AF1L4;RRP7A;PSMB6;RNU12;EXOSC5;PSMB5;EXOSC4;U2AF2;ZMAT5;POLR2E;DHX37;POLR2F;RPL18;POLR2I;POLR2J;RBM10;POLR2L;S…
RNA Polymerase I Transcription Termination	5/33	15.15	0.276558	0.657616	1.4876	1.912	TAF1C;ERCC2;POLR2E;POLR2F;POLR2L
HCMV Early Events	25/205	12.2	0.277644	0.657616	1.158	1.4838	GPS2;H2AC11;H2AC12;TUBA1C;TUBB6;H2AC14;TRIM28;TUBB3;H2BC21;H4C1;H2BC9;SEC13;H2BC5;H2AC6;TUBB4B;H2BC17;TUBA4A;H2BC18;H2BC12;H2BC13;TUBB2B;TUBB2A;H2BC15;H2AC21;H2BC11
Signaling by FGFR2	10/75	13.33	0.281461	0.665166	1.2819	1.6252	PTBP1;SHC1;SRC;POLR2E;POLR2F;GTF2F1;POLR2I;POLR2J;MAPK3;POLR2L
Regulation of Commissural Axon Pathfinding by SLIT and ROBO	2/10	20	0.292072	0.677342	2.082	2.5624	ROBO3;SRC
Removal of Aminoterminal Propeptides From Gamma-Carboxylated Proteins	2/10	20	0.292072	0.677342	2.082	2.5624	FURIN;GAS6
Signal Attenuation	2/10	20	0.292072	0.677342	2.082	2.5624	SHC1;MAPK3
CaMK IV-mediated Phosphorylation of CREB	2/10	20	0.292072	0.677342	2.082	2.5624	CAMK2G;CAMKK1
Caspase Activation via Dependence Receptors in the Absence of Ligand	2/10	20	0.292072	0.677342	2.082	2.5624	DAPK2;DAPK3
Urea Cycle	2/10	20	0.292072	0.677342	2.082	2.5624	ASL;NAGS
Infectious Disease	147/1311	11.21	0.290581	0.677342	1.055	1.3038	SERPINE1;KEAP1;ENO1;RPL8;COMT;PSMD8;H2AC11;PYCARD;RPS15;H2AC12;TUBB6;H2AC14;SNRPD2;TRIM28;RPL18A;RPS19;TUBB3;AKT2;PSMD3;RPL36;AKT1;AP1S1;RPL35;H4C1;GGT1;RPS10;SH3GL1;MAP2K3;VPS18;MAP2K2;H2AC6;LIG1;IL1R1;RPS5;AP1B1;MOGS;CYBA;GTF2F1;HSPG2;TUBA4A;BRMS1;PRKAR1B;HGS;MAP1B;GEMIN4;STX1A;VPS28;SNRPB;GNAZ;LY96;TXN;NCKIPSD;IRAK1;DVL1;HMOX1;MAP2K7;AP1M2;ST3GAL3;VPS16;AP1M1;JUN;APOBEC3G;HMGA1;NFKB2;BST2;PARP…
Nef Mediated CD4 Down-regulation	2/10	20	0.292072	0.677342	2.082	2.5624	AP2A1;AP2A2
Maturation of Protein 3A 9694719	2/10	20	0.292072	0.677342	2.082	2.5624	ST6GALNAC4;ST3GAL3
SLBP Independent Processing of Histone Pre-mRNAs	2/10	20	0.292072	0.677342	2.082	2.5624	LSM10;SNRPB
Activation of PPARGC1A (PGC-1alpha) by Phosphorylation	2/10	20	0.292072	0.677342	2.082	2.5624	MAPK11;MAPK12
MAPK3 (ERK1) Activation	2/10	20	0.292072	0.677342	2.082	2.5624	TYK2;MAPK3
Maturation of Protein 3A 9683673	2/10	20	0.292072	0.677342	2.082	2.5624	ST6GALNAC4;ST3GAL3
Bicarbonate Transporters	2/10	20	0.292072	0.677342	2.082	2.5624	SLC4A2;SLC4A3
Regulation of Lipid Metabolism by PPARalpha	15/119	12.61	0.293145	0.678328	1.202	1.4749	ESRRA;ALAS1;SMARCD3;NR1H2;TXNRD1;FHL2;GPS2;G0S2;MED16;MED27;TIAM2;RXRA;SIN3B;CYP1A1;TRIB3
Transmission Across Chemical Synapses	32/269	11.9	0.293278	0.678328	1.1258	1.3809	SRC;CHRNA6;AP2A1;COMT;AP2A2;KIF17;ADCY7;LIN7B;CAMKK1;PPM1F;GNAI2;TUBA1C;TUBB6;TUBB3;RPS6KA1;PPFIA4;CAMK2G;GIT1;PPFIA3;MAPK3;PRKCB;KCNJ12;NRG1;TUBB4B;TUBA4A;TUBB2B;TUBB2A;PRKAR1B;GNB2;DNAJC5;PICK1;STX1A
Cytoprotection by HMOX1	8/59	13.56	0.296252	0.683386	1.3069	1.5899	COX8A;SMARCD3;RXRA;SIN3B;BLVRB;HMOX1;MAFK;COX5B
Non-integrin membrane-ECM Interactions	8/59	13.56	0.296252	0.683386	1.3069	1.5899	COL4A2;LAMB3;LAMB2;ACTN1;COL5A3;PDGFA;AGRN;HSPG2
Viral mRNA Translation	13/102	12.75	0.297511	0.68538	1.2172	1.4756	RPS5;RPLP1;RPL8;RPS15;RPS28;RPL18A;RPS19;RPL36;RPL35;RPLP2;FAU;RPL18;RPS10
RNA Polymerase III Chain Elongation	3/18	16.67	0.303098	0.685523	1.6657	1.9884	POLR2E;POLR2F;POLR2L
Mitochondrial Unfolded Protein Response (UPRmt)	3/18	16.67	0.303098	0.685523	1.6657	1.9884	HSF1;LONP1;AKT1
Norepinephrine Neurotransmitter Release Cycle	3/18	16.67	0.303098	0.685523	1.6657	1.9884	PPFIA4;PPFIA3;STX1A
TP53 Regulates Transcription of Genes Involved in G2 Cell Cycle Arrest	3/18	16.67	0.303098	0.685523	1.6657	1.9884	PRMT1;BAX;E2F4
Recycling of Bile Acids and Salts	3/18	16.67	0.303098	0.685523	1.6657	1.9884	ABCC3;RXRA;SLC51B
Serotonin Neurotransmitter Release Cycle	3/18	16.67	0.303098	0.685523	1.6657	1.9884	PPFIA4;PPFIA3;STX1A
Activation of IRF3, IRF7 Mediated by TBK1, IKK? (IKBKE)	3/18	16.67	0.303098	0.685523	1.6657	1.9884	IRF3;LY96;IKBKE
Synthesis of IP3 and IP4 in the Cytosol	4/26	15.38	0.302453	0.685523	1.5144	1.811	ITPKC;ITPKA;PLCD3;PLCD1
Polymerase Switching on the C-strand of the Telomere	4/26	15.38	0.302453	0.685523	1.5144	1.811	POLD4;ACD;POLD1;CHTF18
Downregulation of TGF-beta Receptor Signaling	4/26	15.38	0.302453	0.685523	1.5144	1.811	PPP1R15A;STUB1;PPP1CA;SMAD7
Miscellaneous Transport and Binding Events	4/26	15.38	0.302453	0.685523	1.5144	1.811	DMTN;SLC66A1;LRRC8A;LRRC8E
Signaling by ERBB2 in Cancer	4/26	15.38	0.302453	0.685523	1.5144	1.811	SHC1;EGF;CDC37;NRG1
Telomere C-strand (Lagging Strand) Synthesis	5/34	14.71	0.298204	0.685523	1.4362	1.7378	POLD4;ACD;LIG1;POLD1;CHTF18
PI5P, PP2A and IER3 Regulate PI3K AKT Signaling	14/111	12.61	0.30128	0.685523	1.2027	1.4429	PDGFRB;BDNF;SRC;EGF;RHOG;PDGFA;NRG1;IRAK1;RAC2;AKT1;PIP5K1C;FGFR4;FGFR3;MAPK3
Extension of Telomeres	7/51	13.73	0.304052	0.686786	1.3253	1.5779	POLD4;ACD;LIG1;RUVBL2;POLD1;CHTF18;WRAP53
RAC3 GTPase Cycle	12/94	12.77	0.305969	0.690218	1.2194	1.4441	BCR;SYDE1;JAG1;MCAM;RAC3;CDC42EP1;CYBA;SLC1A5;BAIAP2;GIT1;EPHA2;PAK4
Signaling by FGFR2 in Disease	6/43	13.95	0.312056	0.703038	1.3508	1.5731	POLR2E;POLR2F;POLR2I;GTF2F1;POLR2J;POLR2L
High Laminar Flow Shear Stress Activates Signaling by PIEZO1 and PECAM1 CDH5 KDR in Endothelial Cell	9/69	13.04	0.319279	0.714685	1.2496	1.4267	PRR5;CAPNS1;PRKAR1B;GNA11;GNB2;MLST8;AKT1;PIEZO1;ADCY7
Nuclear Events Stimulated by ALK Signaling in Cancer	5/35	14.29	0.320106	0.714685	1.3882	1.5813	MOV10;CEBPB;NOTCH1;JUNB;MAPK3
CaM Pathway	5/35	14.29	0.320106	0.714685	1.3882	1.5813	GRK2;PRKAR1B;ADCY7;CAMK2G;CAMKK1
Translation of Structural Proteins 9683701	5/35	14.29	0.320106	0.714685	1.3882	1.5813	PARP10;PRKCSH;MOGS;ST6GALNAC4;ST3GAL3
Transcriptional Regulation by NPAS4	5/35	14.29	0.320106	0.714685	1.3882	1.5813	MOV10;BDNF;SRF;GEM;MAPK3
Calmodulin Induced Events	5/35	14.29	0.320106	0.714685	1.3882	1.5813	GRK2;PRKAR1B;ADCY7;CAMK2G;CAMKK1
Negative Regulators of DDX58 IFIH1 Signaling	5/35	14.29	0.320106	0.714685	1.3882	1.5813	NLRX1;IRF3;NLRC5;PIN1;IKBKE
rRNA Processing	28/237	11.81	0.322314	0.71869	1.1167	1.2644	DDX49;RPLP1;RRP1;TSR3;NOC4L;SNORD3A;RPL8;RRP9;RPS15;RRP7A;TRMT112;EXOSC5;EXOSC4;RPL18A;RPS19;RPL36;DHX37;RPL35;RPLP2;RPL18;RPS10;WDR18;RPS5;BOP1;RPS28;TBL3;FAU;NOL12
Cell-Cell Communication	19/157	12.1	0.323736	0.720013	1.1474	1.294	VASP;CADM3;CD151;JUP;LAMB3;FBLIM1;SRC;ACTN1;TESK1;ILK;ACTN4;MOV10;CLDN4;CDH24;FLNA;FLNC;NECTIN2;PLEC;NECTIN1
SARS-CoV-1 Infection	19/157	12.1	0.323736	0.720013	1.1474	1.294	PRKCSH;RPS5;SERPINE1;MOGS;PYCARD;RPS15;BST2;NFKBIA;PARP10;RPS28;RPS19;IRF3;CTSL;FAU;CHMP6;RPS10;IKBKE;ST6GALNAC4;ST3GAL3
APOBEC3G Mediated Resistance to HIV-1 Infection	2/11	18.18	0.333518	0.722145	1.8506	2.032	APOBEC3G;HMGA1
Regulation of CDH11 Function	2/11	18.18	0.333518	0.722145	1.8506	2.032	JUP;CDH24
SLBP Dependent Processing of Replication-Dependent Histone Pre-mRNAs	2/11	18.18	0.333518	0.722145	1.8506	2.032	LSM10;SNRPB
Gamma-carboxylation, Transport, and Amino-Terminal Cleavage of Proteins	2/11	18.18	0.333518	0.722145	1.8506	2.032	FURIN;GAS6
NOTCH4 Activation and Transmission of Signal to the Nucleus	2/11	18.18	0.333518	0.722145	1.8506	2.032	PSENEN;JAG1
Phenylalanine and Tyrosine Metabolism	2/11	18.18	0.333518	0.722145	1.8506	2.032	KYAT1;FAH
Receptor Mediated Mitophagy	2/11	18.18	0.333518	0.722145	1.8506	2.032	SRC;ULK1
Constitutive Signaling by Overexpressed ERBB2	2/11	18.18	0.333518	0.722145	1.8506	2.032	SHC1;CDC37
Beta-oxidation of Very Long Chain Fatty Acids	2/11	18.18	0.333518	0.722145	1.8506	2.032	ACOT8;ABCD1
Formation of Annular Gap Junctions	2/11	18.18	0.333518	0.722145	1.8506	2.032	CLTB;DNM1
Regulated Proteolysis of p75NTR	2/11	18.18	0.333518	0.722145	1.8506	2.032	PSENEN;NGFR
Assembly of Active LPL and LIPC Lipase Complexes	3/19	15.79	0.333841	0.722145	1.5615	1.7131	FURIN;LMF2;LMF1
Initiation of Nuclear Envelope (NE) Reformation	3/19	15.79	0.333841	0.722145	1.5615	1.7131	LMNA;LEMD2;SIRT2
TCR Signaling	14/113	12.39	0.325205	0.722145	1.1783	1.3236	VASP;ADRM1;PSMA7;PSMD8;NFKBIA;PSMB6;CDC34;PSMB5;PSMC3;PSMC4;PSMD3;CSK;IKBKG;LAT
TGFBR3 PTM Regulation	2/11	18.18	0.333518	0.722145	1.8506	2.032	PSENEN;TIMP1
Constitutive Signaling by Ligand-Responsive EGFR Cancer Variants	3/19	15.79	0.333841	0.722145	1.5615	1.7131	EGF;SHC1;CDC37
mRNA Activation Upon Binding of the Cap-Binding Complex and eIFs, and Subsequent Binding to 43S	8/61	13.11	0.329209	0.722145	1.2574	1.3971	RPS15;RPS28;RPS19;RPS5;EIF4EBP1;EIF3G;FAU;RPS10
NR1H3 & NR1H2 Regulate Gene Expression Linked to Cholesterol Transport and Efflux	6/44	13.64	0.331734	0.722145	1.3152	1.4512	EEPD1;MOV10;RXRA;NR1H2;GPS2;PLTP
Mitochondrial Fatty Acid Beta-Oxidation of Saturated Fatty Acids	2/11	18.18	0.333518	0.722145	1.8506	2.032	ACADVL;ACADS
Uptake and Actions of Bacterial Toxins	6/44	13.64	0.331734	0.722145	1.3152	1.4512	MAP2K3;MAP2K2;TXNRD1;FURIN;MAP2K7;STX1A
Selenoamino Acid Metabolism	15/122	12.3	0.327582	0.722145	1.1681	1.3036	RPS5;RPLP1;TXNRD1;GSR;RPL8;RPS15;RPS28;RPL18A;RPS19;RPL36;RPL35;RPLP2;FAU;RPL18;RPS10
Signaling by Ligand-Responsive EGFR Variants in Cancer	3/19	15.79	0.333841	0.722145	1.5615	1.7131	EGF;SHC1;CDC37
RHOB GTPase Cycle	9/70	12.86	0.334804	0.723327	1.2291	1.3449	BCR;RTKN;JUP;PKN3;MCAM;ARHGEF10L;ARHGEF1;PKN1;RHOB
Translation	35/302	11.59	0.33892	0.730964	1.0927	1.1823	RPLP1;MRPS34;MRPL38;MRPL17;MRPL14;RPL8;MRPL12;MRPL54;MRPL55;RPS15;MRPL41;MRPL4;TRMT112;RPL18A;RPS19;RPL36;EIF4EBP1;RPL35;RPLP2;RPL18;RPS10;MRPS28;GADD45GIP1;SSR4;RPS5;MRPL28;MRPS2;MRPL23;MRPL53;RPS28;SARS2;EIF3G;FAU;AURKAIP1;FARSA
Signaling by MET	10/79	12.66	0.339181	0.730964	1.2073	1.3054	COL27A1;COL24A1;LAMB3;ITGA3;HGS;SHC1;SRC;LAMB2;COL5A3;SH3GL1
Formation of the Ternary Complex, and Subsequently, the 43S Complex	7/53	13.21	0.339913	0.731635	1.2676	1.3678	RPS15;RPS28;RPS19;RPS5;EIF3G;FAU;RPS10
Signaling by High-Kinase Activity BRAF Mutants	5/36	13.89	0.342184	0.733795	1.3434	1.4407	MAP2K2;VWF;SRC;CSK;MAPK3
Metabolism of Steroid Hormones	5/36	13.89	0.342184	0.733795	1.3434	1.4407	HSD3B2;FDXR;FDX2;TSPO;CYP19A1
Regulation of TP53 Degradation	5/36	13.89	0.342184	0.733795	1.3434	1.4407	PRR5;AKT2;MLST8;AKT1;RFFL
ATF4 Activates Genes in Response to Endoplasmic Reticulum Stress	4/28	14.29	0.353221	0.747942	1.3881	1.4445	CEBPB;EXOSC5;CXCL8;EXOSC4
ER-Phagosome Pathway	10/80	12.5	0.353948	0.747942	1.19	1.236	PSMD8;PSMB6;PSMB5;PSMC3;PSMC4;PSMD3;ADRM1;LY96;IKBKG;PSMA7
TGFBR3 Expression	4/28	14.29	0.353221	0.747942	1.3881	1.4445	MOV10;RXRA;RARA;KLF16
TRP Channels	4/28	14.29	0.353221	0.747942	1.3881	1.4445	TRPM2;TRPV2;MCOLN1;TRPM4
Peroxisomal Lipid Metabolism	4/28	14.29	0.353221	0.747942	1.3881	1.4445	ACOT8;ACOX3;ABCD1;CRAT
Synthesis of PC	4/28	14.29	0.353221	0.747942	1.3881	1.4445	CHKB;STARD10;PEMT;LPIN3
Cap-dependent Translation Initiation	15/124	12.1	0.351057	0.747942	1.1465	1.2002	RPS5;RPLP1;RPL8;RPS15;RPS28;RPL18A;RPS19;RPL36;EIF4EBP1;EIF3G;RPL35;RPLP2;FAU;RPL18;RPS10
Eukaryotic Translation Initiation	15/124	12.1	0.351057	0.747942	1.1465	1.2002	RPS5;RPLP1;RPL8;RPS15;RPS28;RPL18A;RPS19;RPL36;EIF4EBP1;EIF3G;RPL35;RPLP2;FAU;RPL18;RPS10
G Alpha (12 13) Signalling Events	10/80	12.5	0.353948	0.747942	1.19	1.236	TIAM2;GNB2;ARHGEF16;ARHGEF19;ARHGEF18;ARHGEF10L;ARHGEF1;ARHGEF40;RHOC;RHOB
TBC RABGAPs	6/45	13.33	0.351554	0.747942	1.2814	1.3396	GGA1;TSC2;ULK1;TBC1D17;TBC1D10A;RAB11B
Notch-HLH Transcription Pathway	4/28	14.29	0.353221	0.747942	1.3881	1.4445	HDAC5;NOTCH1;HDAC11;HDAC7
Caspase Activation via Extrinsic Apoptotic Signalling Pathway	4/28	14.29	0.353221	0.747942	1.3881	1.4445	DAPK2;DAPK3;LY96;TRAF2
Influenza Infection	20/169	11.83	0.355179	0.749631	1.1184	1.1577	SEC13;RPS5;RPLP1;RPL8;GTF2F1;RPS15;RPS28;RPL18A;RPS19;RPL36;POLR2E;RPL35;RPLP2;POLR2F;FAU;POLR2I;RPL18;RPS10;POLR2J;POLR2L
G-protein Mediated Events	7/54	12.96	0.358049	0.754771	1.2405	1.2741	GRK2;PRKAR1B;GNA11;ADCY7;CAMK2G;CAMKK1;GNAI2
RHOV GTPase Cycle	5/37	13.51	0.364359	0.756473	1.3013	1.3138	WDR6;GIT1;MAP3K11;PAK4;EPHA2
Glutathione Conjugation	5/37	13.51	0.364359	0.756473	1.3013	1.3138	GSTM4;GSTM3;GSTP1;GGT1;GCLM
Molecules Associated With Elastic Fibres	5/37	13.51	0.364359	0.756473	1.3013	1.3138	EFEMP2;LTBP4;LTBP2;EMILIN1;LTBP3
Diseases Associated With N-glycosylation of Proteins	3/20	15	0.364518	0.756473	1.4696	1.4831	ALG12;MOGS;MPDU1
Synthesis of Leukotrienes (LT) and Eoxins (EX)	3/20	15	0.364518	0.756473	1.4696	1.4831	CYP4F11;PTGR1;GGT1
Transcriptional Regulation by MECP2	8/63	12.7	0.362733	0.756473	1.2116	1.2286	GAMT;MOV10;NOTCH1;IRAK1;BDNF;DGCR8;GPS2;CAMK2G
Defective B3GALT6 Causes EDSP2 and SEMDJL1	3/20	15	0.364518	0.756473	1.4696	1.4831	GPC1;AGRN;HSPG2
Phosphorylation of the APC C	3/20	15	0.364518	0.756473	1.4696	1.4831	UBE2S;ANAPC11;ANAPC2
L13a-mediated Translational Silencing of Ceruloplasmin Expression	14/116	12.07	0.361862	0.756473	1.1434	1.1623	RPS5;RPLP1;RPL8;RPS15;RPS28;RPL18A;RPS19;RPL36;EIF3G;RPL35;RPLP2;FAU;RPL18;RPS10
Regulation of TP53 Expression and Degradation	5/37	13.51	0.364359	0.756473	1.3013	1.3138	PRR5;AKT2;MLST8;AKT1;RFFL
Lagging Strand Synthesis	3/20	15	0.364518	0.756473	1.4696	1.4831	POLD4;LIG1;POLD1
Ca-dependent Events	5/37	13.51	0.364359	0.756473	1.3013	1.3138	GRK2;PRKAR1B;ADCY7;CAMK2G;CAMKK1
EML4 and NUDC in Mitotic Spindle Formation	14/116	12.07	0.361862	0.756473	1.1434	1.1623	CENPT;SEC13;RANGAP1;TUBB4B;PMF1;TUBA4A;TUBA1C;TUBB6;TUBB2B;TUBB2A;TUBB3;CENPM;B9D2;MAD1L1
Early SARS-CoV-2 Infection Events	6/46	13.04	0.371463	0.76476	1.2493	1.2372	CTSL;GPC1;FURIN;AGRN;CHMP6;HSPG2
Unwinding of DNA	2/12	16.67	0.37422	0.76476	1.6654	1.637	MCM5;MCM2
Eicosanoids	2/12	16.67	0.37422	0.76476	1.6654	1.637	TBXAS1;CYP4F11
Frs2-mediated Activation	2/12	16.67	0.37422	0.76476	1.6654	1.637	MAP2K2;MAPK3
GTP Hydrolysis and Joining of the 60S Ribosomal Subunit	14/117	11.97	0.374235	0.76476	1.1323	1.1129	RPS5;RPLP1;RPL8;RPS15;RPS28;RPL18A;RPS19;RPL36;EIF3G;RPL35;RPLP2;FAU;RPL18;RPS10
Gap Junction Degradation	2/12	16.67	0.37422	0.76476	1.6654	1.637	CLTB;DNM1
Signaling by LTK	2/12	16.67	0.37422	0.76476	1.6654	1.637	SHC1;TNK2
Sphingolipid Catabolism	2/12	16.67	0.37422	0.76476	1.6654	1.637	ALDH3B1;PLPP2
Suppression of Apoptosis	2/12	16.67	0.37422	0.76476	1.6654	1.637	PTPA;MAPK3
PPARA Activates Gene Expression	14/117	11.97	0.374235	0.76476	1.1323	1.1129	ESRRA;ALAS1;SMARCD3;NR1H2;TXNRD1;FHL2;GPS2;G0S2;MED16;MED27;TIAM2;RXRA;CYP1A1;TRIB3
Interleukin-35 Signalling	2/12	16.67	0.37422	0.76476	1.6654	1.637	STAT4;TYK2
Regulation of Localization of FOXO Transcription Factors	2/12	16.67	0.37422	0.76476	1.6654	1.637	AKT2;AKT1
Caspase-mediated Cleavage of Cytoskeletal Proteins	2/12	16.67	0.37422	0.76476	1.6654	1.637	DBNL;PLEC
HCMV Late Events	20/171	11.7	0.375577	0.7666	1.1035	1.0806	H2BC9;SEC13;H2AC6;H2BC5;H2BC17;H2BC18;H2AC11;H2BC12;H2AC12;H2BC13;H2AC14;H2BC15;H2BC21;H2AC21;CHMP1A;H2BC11;MVB12A;H4C1;CHMP6;VPS28
Intrinsic Pathway for Apoptosis	7/55	12.73	0.376265	0.767104	1.2146	1.1872	BAD;AKT2;AKT1;PMAIP1;BAX;BBC3;MAPK3
TNFs Bind Their Physiological Receptors	4/29	13.79	0.378659	0.769276	1.3325	1.294	CD70;TNFRSF8;TNFSF9;TNFRSF1A
Downstream Signal Transduction	4/29	13.79	0.378659	0.769276	1.3325	1.294	PDGFRB;SRC;PDGFA;BCAR1
G1 S-Specific Transcription	4/29	13.79	0.378659	0.769276	1.3325	1.294	CDT1;LIN37;E2F4;TK1
Downstream TCR Signaling	11/91	12.09	0.384939	0.78112	1.1453	1.0934	PSMD8;PSMB6;NFKBIA;CDC34;PSMB5;PSMC3;PSMC4;PSMD3;ADRM1;IKBKG;PSMA7
Fanconi Anemia Pathway	5/38	13.16	0.386557	0.782575	1.2618	1.1993	MUS81;EME2;ERCC1;FAAP20;FAAP100
Maturation of Spike Protein 9694548	5/38	13.16	0.386557	0.782575	1.2618	1.1993	PRKCSH;MGAT4B;MOGS;ST6GALNAC4;ST3GAL3
CTLA4 Inhibitory Signaling	3/21	14.29	0.394949	0.791609	1.3879	1.2893	SRC;AKT2;AKT1
Inactivation of APC C via Direct Inhibition of the APC C Complex	3/21	14.29	0.394949	0.791609	1.3879	1.2893	UBE2S;ANAPC11;ANAPC2
Activation of NOXA and Translocation to Mitochondria	1/5	20	0.432947	0.791609	2.0815	1.7425	PMAIP1
LRR FLII-interacting Protein 1 (LRRFIP1) Activates Type I IFN Production	1/5	20	0.432947	0.791609	2.0815	1.7425	IRF3
Loss of Function of FBXW7 in Cancer and NOTCH1 Signaling	1/5	20	0.432947	0.791609	2.0815	1.7425	NOTCH1
Maple Syrup Urine Disease	1/5	20	0.432947	0.791609	2.0815	1.7425	BCKDHA
Synthesis of PIPs at the ER Membrane	1/5	20	0.432947	0.791609	2.0815	1.7425	SBF1
TFAP2A Acts as a Transcriptional Repressor During Retinoic Acid Induced Cell Differentiation	1/5	20	0.432947	0.791609	2.0815	1.7425	MYBL2
Tachykinin Receptors Bind Tachykinins	1/5	20	0.432947	0.791609	2.0815	1.7425	TAC1
FBXW7 Mutants and NOTCH1 in Cancer	1/5	20	0.432947	0.791609	2.0815	1.7425	NOTCH1
Formation of Xylulose-5-Phosphate	1/5	20	0.432947	0.791609	2.0815	1.7425	DCXR
Arachidonate Production From DAG	1/5	20	0.432947	0.791609	2.0815	1.7425	DAGLB
Beta Oxidation of butanoyl-CoA to acetyl-CoA	1/5	20	0.432947	0.791609	2.0815	1.7425	ACADS
Beta Oxidation of hexanoyl-CoA to butanoyl-CoA	1/5	20	0.432947	0.791609	2.0815	1.7425	ACADS
H139Hfs13* PPM1K Causes a Mild Variant of MSUD	1/5	20	0.432947	0.791609	2.0815	1.7425	BCKDHA
GRB7 Events in ERBB2 Signaling	1/5	20	0.432947	0.791609	2.0815	1.7425	NRG1
Fructose Catabolism	1/5	20	0.432947	0.791609	2.0815	1.7425	GLYCTK
Disorders of Developmental Biology	2/13	15.38	0.413862	0.791609	1.5139	1.3356	BDNF;GPS2
NR1H2 & NR1H3 Regulate Gene Expression Linked to Gluconeogenesis	1/5	20	0.432947	0.791609	2.0815	1.7425	RXRA
Disorders of Nervous System Development	2/13	15.38	0.413862	0.791609	1.5139	1.3356	BDNF;GPS2
ERBB2 Activates PTK6 Signaling	2/13	15.38	0.413862	0.791609	1.5139	1.3356	EGF;NRG1
NFE2L2 Regulating ER-stress Associated Genes	1/5	20	0.432947	0.791609	2.0815	1.7425	MAFK
Regulation of NPAS4 Gene Transcription	1/5	20	0.432947	0.791609	2.0815	1.7425	SRF
Negative Regulation of TCF-dependent Signaling by DVL-interacting Proteins	1/5	20	0.432947	0.791609	2.0815	1.7425	DVL1
NTRK2 Activates RAC1	1/5	20	0.432947	0.791609	2.0815	1.7425	BDNF
Transmission Across Electrical Synapses	1/5	20	0.432947	0.791609	2.0815	1.7425	PANX2
Tyrosine Catabolism	1/5	20	0.432947	0.791609	2.0815	1.7425	FAH
Vitamin B1 (Thiamin) Metabolism	1/5	20	0.432947	0.791609	2.0815	1.7425	SLC25A19
Advanced Glycosylation Endproduct Receptor Signaling	2/13	15.38	0.413862	0.791609	1.5139	1.3356	PRKCSH;MAPK3
Diseases of Branched-Chain Amino Acid Catabolism	2/13	15.38	0.413862	0.791609	1.5139	1.3356	BCKDHA;BCKDK
Glycosphingolipid Catabolism	5/39	12.82	0.408707	0.791609	1.2246	1.0958	ARSA;SMPD4;ARSL;PSAP;GLA
Interleukin-12 Family Signaling	7/56	12.5	0.39452	0.791609	1.1898	1.1066	CNN2;SERPINB2;AIP;STAT4;TALDO1;TYK2;LCP1
HSP90 Chaperone Cycle for Steroid Hormone Receptors (SHR) in the Presence of Ligand	7/56	12.5	0.39452	0.791609	1.1898	1.1066	TUBA1C;TUBB6;TUBB2B;TUBB2A;TUBB3;TUBB4B;TUBA4A
SHC1 Events in ERBB2 Signaling	3/22	13.64	0.424977	0.791609	1.3148	1.1251	EGF;SHC1;NRG1
RA Biosynthesis Pathway	3/22	13.64	0.424977	0.791609	1.3148	1.1251	CYP26A1;CYP26B1;AKR1C3
Electric Transmission Across Gap Junctions	1/5	20	0.432947	0.791609	2.0815	1.7425	PANX2
Disinhibition of SNARE Formation	1/5	20	0.432947	0.791609	2.0815	1.7425	PRKCB
Biosynthesis of E-series 18(S)-resolvins	1/5	20	0.432947	0.791609	2.0815	1.7425	GPX4
Defects in Vitamin and Cofactor Metabolism	3/22	13.64	0.424977	0.791609	1.3148	1.1251	PC;TCN2;CD320
SUMOylation of Intracellular Receptors	4/30	13.33	0.403991	0.791609	1.2811	1.1612	PIAS4;RXRA;NR1H2;RARA
Regulation of TP53 Activity Through Acetylation	4/30	13.33	0.403991	0.791609	1.2811	1.1612	MBD3;AKT2;AKT1;PIN1
TP53 Regulates Transcription of Additional Cell Cycle Genes With Uncertain Roles in the P53 Pathway	3/21	14.29	0.394949	0.791609	1.3879	1.2893	PLK3;RGCC;TNKS1BP1
PCNA-Dependent Long Patch Base Excision Repair	3/21	14.29	0.394949	0.791609	1.3879	1.2893	POLD4;LIG1;POLD1
Complex IV Assembly	6/48	12.5	0.411327	0.791609	1.1897	1.0569	COX8A;PNKD;PET100;COX17;COX5B;RAB5IF
RHOG GTPase Cycle	9/74	12.16	0.397873	0.791609	1.1532	1.0628	PLEKHG3;ARHGDIA;MCAM;ARHGEF16;RHOG;CDC42EP1;MAP3K11;EPHA2;PAK4
Signaling by BRAF and RAF1 Fusions	8/65	12.31	0.396555	0.791609	1.1689	1.0812	MAP2K2;VWF;SRC;LMNA;AGTRAP;CSK;CAMK2G;MAPK3
Branched-chain Amino Acid Catabolism	3/21	14.29	0.394949	0.791609	1.3879	1.2893	BCKDHA;BCKDK;BCAT2
Alpha-Linolenic Acid (ALA) Metabolism	2/13	15.38	0.413862	0.791609	1.5139	1.3356	ACOT8;ABCD1
Alpha-Linolenic (Omega3) and Linoleic (Omega6) Acid Metabolism	2/13	15.38	0.413862	0.791609	1.5139	1.3356	ACOT8;ABCD1
Ubiquinol Biosynthesis	2/13	15.38	0.413862	0.791609	1.5139	1.3356	COQ4;COQ8B
The Activation of Arylsulfatases	2/13	15.38	0.413862	0.791609	1.5139	1.3356	ARSA;ARSL
NPAS4 Regulates Expression of Target Genes	3/22	13.64	0.424977	0.791609	1.3148	1.1251	BDNF;GEM;MAPK3
Listeria Monocytogenes Entry Into Host Cells	3/22	13.64	0.424977	0.791609	1.3148	1.1251	SRC;HGS;SH3GL1
Early Phase of HIV Life Cycle	3/22	13.64	0.424977	0.791609	1.3148	1.1251	LIG1;HMGA1;CXCR4
Mitochondrial Iron-Sulfur Cluster Biogenesis	2/13	15.38	0.413862	0.791609	1.5139	1.3356	FDX2;FDXR
Loss of Function of MECP2 in Rett Syndrome	2/13	15.38	0.413862	0.791609	1.5139	1.3356	BDNF;GPS2
IRF3-mediated Induction of Type I IFN	2/13	15.38	0.413862	0.791609	1.5139	1.3356	IRF3;NLRP4
Glutathione Synthesis and Recycling	2/13	15.38	0.413862	0.791609	1.5139	1.3356	GCLM;GGT1
ERKs Are Inactivated	2/13	15.38	0.413862	0.791609	1.5139	1.3356	VRK3;MAPK3
Inhib of Proteolytic Activity of APC C Required for Onset of Anaphase by Mitotic Spindle Checkpoint	3/21	14.29	0.394949	0.791609	1.3879	1.2893	UBE2S;ANAPC11;ANAPC2
TP53 Regulates Transcription of Cell Cycle Genes	6/49	12.24	0.431183	0.791609	1.1619	0.9775	PLK3;RGCC;PRMT1;TNKS1BP1;BAX;E2F4
Nonsense Mediated Decay (NMD) Enhanced by the Exon Junction Complex (EJC)	14/120	11.67	0.411629	0.791609	1.1001	0.9764	UPF1;RPS5;RPLP1;RPL8;RPS15;RPS28;RPL18A;RPS19;RPL36;RPL35;RPLP2;FAU;RPL18;RPS10
Interaction Between L1 and Ankyrins	4/31	12.9	0.429119	0.791609	1.2336	1.0437	SPTA1;KCNQ3;L1CAM;SCN2A
HS-GAG Biosynthesis	4/31	12.9	0.429119	0.791609	1.2336	1.0437	GPC1;AGRN;HS6ST1;HSPG2
Endosomal Sorting Complex Required For Transport (ESCRT)	4/31	12.9	0.429119	0.791609	1.2336	1.0437	HGS;MVB12A;CHMP6;VPS28
HCMV Infection	29/259	11.2	0.432036	0.791609	1.0502	0.8814	GPS2;H2AC11;H2AC12;TUBA1C;TUBB6;H2AC14;TRIM28;TUBB3;H2BC21;CHMP1A;MVB12A;H4C1;H2BC9;SEC13;H2BC5;H2AC6;TUBB4B;H2BC17;TUBA4A;H2BC18;H2BC12;H2BC13;TUBB2B;TUBB2A;H2BC15;H2AC21;H2BC11;CHMP6;VPS28
RHOA GTPase Cycle	17/149	11.41	0.431805	0.791609	1.0726	0.9008	PLEKHG3;PLEKHG4;RTKN;JUP;PKN3;MCAM;ARHGEF19;ARHGEF18;ARHGEF10L;ARAP1;DEF6;BCR;DDRGK1;ARHGDIA;ARHGEF1;PKN1;ARHGEF40
Antiviral Mechanism by IFN-stimulated Genes	18/158	11.39	0.430252	0.791609	1.0708	0.9031	SEC13;SPHK1;TUBB4B;FAAP20;TUBA4A;TARBP2;TUBA1C;TUBB6;TUBB2B;TUBB2A;IRF3;TUBB3;PIN1;FLNA;FLNB;IKBKG;FAAP100;MAPK3
RHO GTPase Cycle	50/450	11.11	0.417144	0.791609	1.0415	0.9106	RTKN;ARHGEF10L;SYDE1;BAIAP2L2;ARHGDIA;EFHD2;RAC2;WDR6;RAC3;ARHGEF40;GIT1;PLEKHG3;PLEKHG4;ACTN1;ARHGEF16;RHOG;ARHGEF19;ARHGEF18;CYBA;ARAP1;RHOC;RHOB;BCR;TIAM2;HGS;CDC37;CDC42EP2;CDC42EP1;ARHGEF1;DBN1;EPHA2;PKN3;SRC;GPS1;SLC1A5;SH3BP1;DDRGK1;CSK;PAK4;JAG1;JUP;MTX1;MCAM;BAIAP2;DEF6;ARHGAP33;UBXN11;SHKBP1;PKN1;MAP3K11
Processing of Capped Intron-Containing Pre-mRNA	32/285	11.23	0.419286	0.791609	1.0536	0.9158	SF3B5;PRKRIP1;PQBP1;U2AF1L4;PTBP1;SART1;RNU12;SNRPD2;U2AF2;ZMAT5;POLR2E;POLR2F;POLR2I;POLR2J;RBM10;POLR2L;SEC13;SF3A2;PPIL2;CCDC12;CPSF1;ALYREF;GTF2F1;THOC6;XAB2;LSM7;DDX39A;PRPF6;RBM42;CACTIN;SNRPB;FAM50A
TICAM1-dependent Activation of IRF3 IRF7	2/13	15.38	0.413862	0.791609	1.5139	1.3356	IRF3;IKBKE
Pervasive Developmental Disorders	2/13	15.38	0.413862	0.791609	1.5139	1.3356	BDNF;GPS2
Nephron Development	2/13	15.38	0.413862	0.791609	1.5139	1.3356	LFNG;JAG1
Signaling by NOTCH1 PEST Domain Mutants in Cancer	7/58	12.07	0.430987	0.791609	1.143	0.962	PSENEN;HDAC5;NOTCH1;JAG1;HDAC11;MIB2;HDAC7
Signaling by NOTCH1 HD+PEST Domain Mutants in Cancer	7/58	12.07	0.430987	0.791609	1.143	0.962	PSENEN;HDAC5;NOTCH1;JAG1;HDAC11;MIB2;HDAC7
Signaling by ERBB4	7/58	12.07	0.430987	0.791609	1.143	0.962	PSENEN;SHC1;SRC;EGF;NRG1;ADAP1;MXD4
Constitutive Signaling by NOTCH1 PEST Domain Mutants	7/58	12.07	0.430987	0.791609	1.143	0.962	PSENEN;HDAC5;NOTCH1;JAG1;HDAC11;MIB2;HDAC7
Constitutive Signaling by NOTCH1 HD+PEST Domain Mutants	7/58	12.07	0.430987	0.791609	1.143	0.962	PSENEN;HDAC5;NOTCH1;JAG1;HDAC11;MIB2;HDAC7
Retrograde Transport at the Trans-Golgi-Network	6/49	12.24	0.431183	0.791609	1.1619	0.9775	NAPA;ARFRP1;VPS51;PLIN3;NAA38;STX10
PLC Beta Mediated Events	6/49	12.24	0.431183	0.791609	1.1619	0.9775	GRK2;PRKAR1B;GNA11;ADCY7;CAMK2G;CAMKK1
CDC42 GTPase Cycle	18/155	11.61	0.397397	0.791609	1.0945	1.01	PLEKHG3;PLEKHG4;JUP;ARHGEF16;ARHGEF19;ARAP1;BAIAP2;DEF6;BCR;ARHGAP33;SYDE1;ARHGDIA;SHKBP1;CDC42EP2;CDC42EP1;MAP3K11;GIT1;PAK4
SRP-dependent Cotranslational Protein Targeting to Membrane	14/119	11.76	0.399131	0.791609	1.1106	1.02	SSR4;RPS5;RPLP1;RPL8;RPS15;RPS28;RPL18A;RPS19;RPL36;RPL35;RPLP2;FAU;RPL18;RPS10
Signaling by CSF1 (M-CSF) in Myeloid Cells	4/31	12.9	0.429119	0.791609	1.2336	1.0437	CSF1;SHC1;SRC;GAB3
RAC1 GTPase Cycle	21/184	11.41	0.415654	0.791609	1.0731	0.9421	PLEKHG3;PLEKHG4;JAG1;MCAM;ARHGEF19;ARHGEF18;CYBA;SLC1A5;ARAP1;BAIAP2;DEF6;BCR;TIAM2;ARHGAP33;SH3BP1;ARHGDIA;CDC42EP1;PKN1;GIT1;EPHA2;PAK4
RNA Polymerase II Transcription Termination	8/67	11.94	0.430416	0.791609	1.1292	0.9519	LSM10;DDX39A;CPSF1;U2AF2;ALYREF;THOC6;SNRPB;U2AF1L4
Signaling by NOTCH1 in Cancer	7/58	12.07	0.430987	0.791609	1.143	0.962	PSENEN;HDAC5;NOTCH1;JAG1;HDAC11;MIB2;HDAC7
EGFR Downregulation	4/31	12.9	0.429119	0.791609	1.2336	1.0437	EGF;HGS;EPN1;SH3GL1
Disassembly of the Destruction Complex and Recruitment of AXIN to the Membrane	4/31	12.9	0.429119	0.791609	1.2336	1.0437	DVL1;LRP5;AXIN1;CSNK1G2
Constitutive Signaling by Aberrant PI3K in Cancer	10/83	12.05	0.39869	0.791609	1.1409	1.0492	PDGFRB;SRC;BDNF;EGF;RAC2;RHOG;PDGFA;NRG1;FGFR4;FGFR3
RNA Polymerase I Transcription Initiation	6/48	12.5	0.411327	0.791609	1.1897	1.0569	MBD3;TAF1C;ERCC2;POLR2E;POLR2F;POLR2L
Inositol Phosphate Metabolism	6/48	12.5	0.411327	0.791609	1.1897	1.0569	ITPKC;ISYNA1;IMPA2;ITPKA;PLCD3;PLCD1
Nonsense-Mediated Decay (NMD)	14/120	11.67	0.411629	0.791609	1.1001	0.9764	UPF1;RPS5;RPLP1;RPL8;RPS15;RPS28;RPL18A;RPS19;RPL36;RPL35;RPLP2;FAU;RPL18;RPS10
RNA Polymerase III Transcription Termination	3/23	13.04	0.454466	0.801429	1.2489	0.985	POLR2E;POLR2F;POLR2L
Signaling by NODAL	3/23	13.04	0.454466	0.801429	1.2489	0.985	DRAP1;FURIN;MAPK3
Polymerase Switching	2/14	14.29	0.452204	0.801429	1.3877	1.1013	POLD4;POLD1
Methylation	2/14	14.29	0.452204	0.801429	1.3877	1.1013	TRMT112;COMT
Golgi Cisternae Pericentriolar Stack Reorganization	2/14	14.29	0.452204	0.801429	1.3877	1.1013	RAB1B;MAPK3
Glycogen Breakdown (Glycogenolysis)	2/14	14.29	0.452204	0.801429	1.3877	1.1013	PYGB;GAA
Lysosphingolipid and LPA Receptors	2/14	14.29	0.452204	0.801429	1.3877	1.1013	PLPPR2;S1PR2
Leading Strand Synthesis	2/14	14.29	0.452204	0.801429	1.3877	1.1013	POLD4;POLD1
SHC1 Events in EGFR Signaling	2/14	14.29	0.452204	0.801429	1.3877	1.1013	EGF;SHC1
SARS-CoV-2 Modulates Autophagy	2/14	14.29	0.452204	0.801429	1.3877	1.1013	VPS18;VPS16
Response to Metal Ions	2/14	14.29	0.452204	0.801429	1.3877	1.1013	MT2A;CSRP1
Removal of the Flap Intermediate	2/14	14.29	0.452204	0.801429	1.3877	1.1013	POLD4;POLD1
Regulation of TBK1, IKK? (IKBKE)-mediated Activation of IRF3, IRF7	2/14	14.29	0.452204	0.801429	1.3877	1.1013	LY96;IKBKE
Regulation of NPAS4 Gene Expression	2/14	14.29	0.452204	0.801429	1.3877	1.1013	MOV10;SRF
Synthesis of IP2, IP, and Ins in the Cytosol	2/14	14.29	0.452204	0.801429	1.3877	1.1013	ISYNA1;IMPA2
SHC1 Events in ERBB4 Signaling	2/14	14.29	0.452204	0.801429	1.3877	1.1013	SHC1;NRG1
DDX58 IFIH1-mediated Induction of Interferon-Alpha Beta	10/86	11.63	0.443621	0.801429	1.0957	0.8906	NFKBIA;NLRX1;IRF3;NLRC5;PIN1;TRAF2;IKBKG;IKBKE;NFKB2;NFKBIB
Cargo Recognition for Clathrin-Mediated Endocytosis	12/105	11.43	0.453628	0.801429	1.0745	0.8494	GRK2;HGS;SGIP1;EGF;GPS1;CLTB;AP2A1;KIAA0319;AP2A2;EPN1;SH3GL1;SLC2A8
RHOBTB2 GTPase Cycle	3/23	13.04	0.454466	0.801429	1.2489	0.985	ACTN1;CDC37;DBN1
Long-term Potentiation	3/23	13.04	0.454466	0.801429	1.2489	0.985	SRC;NRG1;CAMK2G
Triglyceride Biosynthesis	2/14	14.29	0.452204	0.801429	1.3877	1.1013	DGAT1;LPIN3
TP53 Regulates Transcription of Cell Death Genes With Uncertain Role in P53-Dependent Apoptosis	2/14	14.29	0.452204	0.801429	1.3877	1.1013	NDRG1;RABGGTA
Intrinsic Pathway of Fibrin Clot Formation	3/23	13.04	0.454466	0.801429	1.2489	0.985	SERPIND1;VWF;F12
IKK Complex Recruitment Mediated by RIP1	3/23	13.04	0.454466	0.801429	1.2489	0.985	LY96;IKBKG;BIRC3
Regulation of Necroptotic Cell Death	4/32	12.5	0.453957	0.801429	1.1895	0.9394	CDC37;TRAF2;STUB1;BIRC3
DAG and IP3 Signaling	5/41	12.2	0.4526	0.801429	1.1565	0.9168	GRK2;PRKAR1B;ADCY7;CAMK2G;CAMKK1
Signaling by Retinoic Acid	5/41	12.2	0.4526	0.801429	1.1565	0.9168	CYP26A1;CYP26B1;RXRA;AKR1C3;RARA
RET Signaling	5/41	12.2	0.4526	0.801429	1.1565	0.9168	DOK1;DOK4;SHC1;SRC;PDLIM7
Telomere Extension By Telomerase	3/23	13.04	0.454466	0.801429	1.2489	0.985	ACD;RUVBL2;WRAP53
PINK1-PRKN Mediated Mitophagy	4/32	12.5	0.453957	0.801429	1.1895	0.9394	PINK1;TOMM40;ATG9A;SQSTM1
RUNX3 Regulates NOTCH Signaling	2/14	14.29	0.452204	0.801429	1.3877	1.1013	JAG1;NOTCH1
Prolonged ERK Activation Events	2/14	14.29	0.452204	0.801429	1.3877	1.1013	MAP2K2;MAPK3
Adenylate Cyclase Inhibitory Pathway	2/14	14.29	0.452204	0.801429	1.3877	1.1013	ADCY7;GNAI2
Defects in Cobalamin (B12) Metabolism	2/14	14.29	0.452204	0.801429	1.3877	1.1013	TCN2;CD320
Glutamate and Glutamine Metabolism	2/14	14.29	0.452204	0.801429	1.3877	1.1013	KYAT1;RIMKLA
COPII-mediated Vesicle Transport	8/69	11.59	0.464071	0.817537	1.092	0.8384	NAPA;SEC13;TRAPPC6A;PPP6R1;RAB1B;LMAN2;TRAPPC5;PREB
Ribosomal Scanning and Start Codon Recognition	7/60	11.67	0.46715	0.821295	1.0997	0.837	RPS15;RPS28;RPS19;RPS5;EIF3G;FAU;RPS10
Translation Initiation Complex Formation	7/60	11.67	0.46715	0.821295	1.0997	0.837	RPS15;RPS28;RPS19;RPS5;EIF3G;FAU;RPS10
Transcriptional Activity of SMAD2 SMAD3 SMAD4 Heterotrimer	6/51	11.76	0.470507	0.826361	1.1102	0.837	SERPINE1;FURIN;E2F4;JUNB;MAPK3;SMAD7
Other Interleukin Signaling	3/24	12.5	0.483301	0.830294	1.1894	0.8648	CSF1;TYK2;STX1A
Estrogen Biosynthesis	1/6	16.67	0.493779	0.830294	1.6651	1.175	CYP19A1
Activated NTRK2 Signals Through CDK5	1/6	16.67	0.493779	0.830294	1.6651	1.175	BDNF
Phenylalanine Metabolism	1/6	16.67	0.493779	0.830294	1.6651	1.175	KYAT1
NFE2L2 Regulating Inflammation Associated Genes	1/6	16.67	0.493779	0.830294	1.6651	1.175	MAFK
Fibronectin Matrix Formation	1/6	16.67	0.493779	0.830294	1.6651	1.175	ITGA5
LTC4-CYSLTR Mediated IL4 Production	1/6	16.67	0.493779	0.830294	1.6651	1.175	GGT1
Mineralocorticoid Biosynthesis	1/6	16.67	0.493779	0.830294	1.6651	1.175	HSD3B2
NADE Modulates Death Signalling	1/6	16.67	0.493779	0.830294	1.6651	1.175	NGFR
Mitochondrial Fatty Acid Beta-Oxidation of Unsaturated Fatty Acids	1/6	16.67	0.493779	0.830294	1.6651	1.175	ECI1
GRB2 SOS Provides Linkage to MAPK Signaling for Integrins	2/15	13.33	0.489067	0.830294	1.2809	0.9162	VWF;SRC
ERBB2 Regulates Cell Motility	2/15	13.33	0.489067	0.830294	1.2809	0.9162	EGF;NRG1
p75NTR Negatively Regulates Cell Cycle via SC1	1/6	16.67	0.493779	0.830294	1.6651	1.175	NGFR
Pre-NOTCH Processing in the Endoplasmic Reticulum	1/6	16.67	0.493779	0.830294	1.6651	1.175	NOTCH1
Phosphorylation of Emi1	1/6	16.67	0.493779	0.830294	1.6651	1.175	FZR1
N-Glycan Antennae Elongation	2/15	13.33	0.489067	0.830294	1.2809	0.9162	ST8SIA2;MGAT4B
Membrane Binding and Targetting of GAG Proteins	2/15	13.33	0.489067	0.830294	1.2809	0.9162	MVB12A;VPS28
Uptake and Function of Diphtheria Toxin	1/6	16.67	0.493779	0.830294	1.6651	1.175	TXNRD1
Biosynthesis of Lipoxins (LX)	1/6	16.67	0.493779	0.830294	1.6651	1.175	PTGR1
TNFR1-mediated Ceramide Production	1/6	16.67	0.493779	0.830294	1.6651	1.175	TNFRSF1A
Signaling by LRP5 Mutants	1/6	16.67	0.493779	0.830294	1.6651	1.175	LRP5
RUNX1 Regulates Estrogen Receptor Mediated Transcription	1/6	16.67	0.493779	0.830294	1.6651	1.175	AXIN1
RUNX1 Regulates Transcription of Genes Involved in WNT Signaling	1/6	16.67	0.493779	0.830294	1.6651	1.175	AXIN1
RUNX3 Regulates Immune Response and Cell Migration	1/6	16.67	0.493779	0.830294	1.6651	1.175	SPP1
SLC15A4 TASL-dependent IRF5 Activation	1/6	16.67	0.493779	0.830294	1.6651	1.175	IKBKG
Activated NTRK3 Signals Through PI3K	1/6	16.67	0.493779	0.830294	1.6651	1.175	SRC
Acyl Chain Remodeling of CL	1/6	16.67	0.493779	0.830294	1.6651	1.175	PLA2G6
APC C Cdc20 Mediated Degradation of Cyclin B	3/24	12.5	0.483301	0.830294	1.1894	0.8648	UBE2S;ANAPC11;ANAPC2
Biosynthesis of EPA-derived SPMs	1/6	16.67	0.493779	0.830294	1.6651	1.175	GPX4
Cilium Assembly	22/200	11	0.483602	0.830294	1.0291	0.7476	DYNC2I2;IFT140;SSNA1;FBF1;CEP131;HAUS5;TUBB4B;KIF17;PKD1;TUBA4A;TUBA1C;TUBB2B;TUBB6;TUBB2A;TUBB3;HAUS7;IFT27;B9D1;NPHP4;B9D2;KIF3C;DYNLRB1
Regulation of Innate Immune Responses to Cytosolic DNA	2/15	13.33	0.489067	0.830294	1.2809	0.9162	IRF3;NLRP4
Synthesis And Processing Of GAG, GAGPOL Polyproteins	2/15	13.33	0.489067	0.830294	1.2809	0.9162	MVB12A;VPS28
mRNA Decay by 5' to 3' Exoribonuclease	2/15	13.33	0.489067	0.830294	1.2809	0.9162	EDC4;LSM7
PERK Regulates Gene Expression	4/33	12.12	0.478426	0.830294	1.1484	0.8467	CEBPB;EXOSC5;CXCL8;EXOSC4
Resolution of Sister Chromatid Cohesion	14/126	11.11	0.486516	0.830294	1.0408	0.7499	CENPT;SEC13;RANGAP1;TUBB4B;PMF1;TUBA4A;TUBA1C;TUBB6;TUBB2B;TUBB2A;TUBB3;CENPM;B9D2;MAD1L1
Apoptotic Execution Phase	6/52	11.54	0.489891	0.830294	1.086	0.7749	H1-5;H1-4;DBNL;LMNA;PLEC;H1-2
Protein-protein Interactions at Synapses	10/88	11.36	0.473397	0.830294	1.0675	0.7983	PTPRS;DBNL;SHARPIN;LRFN4;IL1RAPL1;HOMER3;PPFIA4;LIN7B;PPFIA3;STX1A
RAS Processing	3/24	12.5	0.483301	0.830294	1.1894	0.8648	ABHD17A;ARL2;RCE1
Sialic Acid Metabolism	4/33	12.12	0.478426	0.830294	1.1484	0.8467	ST8SIA2;ST6GALNAC4;ST3GAL3;ST6GALNAC6
Thromboxane Signalling Through TP Receptor	3/24	12.5	0.483301	0.830294	1.1894	0.8648	GNA11;GNB2;AAMP
SARS-CoV-2 Targets Host Intracellular Signalling and Regulatory Pathways	2/15	13.33	0.489067	0.830294	1.2809	0.9162	AKT2;AKT1
IRAK2 Mediated Activation of TAK1 Complex Upon TLR7 8 or 9 Stimulation	2/15	13.33	0.489067	0.830294	1.2809	0.9162	LY96;TAB1
Glutamate Neurotransmitter Release Cycle	3/24	12.5	0.483301	0.830294	1.1894	0.8648	PPFIA4;PPFIA3;STX1A
Assembly Of The HIV Virion	3/24	12.5	0.483301	0.830294	1.1894	0.8648	MVB12A;FURIN;VPS28
Negative Regulation of MAPK Pathway	5/43	11.63	0.495562	0.83036	1.0955	0.7691	DUSP5;DUSP2;MAP2K2;MAPK12;MAPK3
MITF-M-regulated Melanocyte Development	15/136	11.03	0.495075	0.83036	1.0321	0.7256	ATP6V0B;SMARCD3;LIG1;MOV10;MC1R;AKT2;BCL7C;DPF1;RPS6KA1;ID1;TFEC;BIRC7;ATP6V0C;ATP6V1F;MAPK3
ADORA2B Mediated Anti-Inflammatory Cytokines Production	5/43	11.63	0.495562	0.83036	1.0955	0.7691	GNAZ;PRKAR1B;GNB2;ADCY7;GNAI2
SARS-CoV-2 Infection	34/313	10.86	0.49573	0.83036	1.0146	0.712	PRKCSH;FURIN;RPS15;RPS19;SNRPD2;IRAK1;CTSL;AKT2;GPC1;AKT1;IKBKG;RPS10;IKBKE;ST3GAL3;VPS16;VPS18;SEC13;PRMT1;RPS5;MOGS;TYK2;HSPG2;IL17RC;PARP10;RPS28;IRF3;MGAT4B;GEMIN4;FAU;TAB1;AGRN;CHMP6;ST6GALNAC4;SNRPB
Metabolism of Water-Soluble Vitamins and Cofactors	14/127	11.02	0.498869	0.834813	1.0315	0.7173	SLC52A2;SLC2A1;MTHFS;NADSYN1;PPCDC;PARP10;PC;TCN2;SLC25A19;FPGS;ACP5;NADK;SLC19A1;CD320
Metabolism of Steroids	17/155	10.97	0.499351	0.834814	1.0256	0.7122	PIAS4;ABCC3;ACOT8;OSBPL7;SMARCD3;HSD3B2;AKR1C1;AKR1C3;SLC51B;CYP19A1;CYP27A1;RXRA;FDXR;FDX2;SCAP;TSPO;MVD
Transport of Small Molecules	78/724	10.77	0.501331	0.835982	1.0053	0.6941	SLC25A1;SLC2A1;AP2A1;SLC4A2;TCIRG1;SLC7A11;SLC4A3;ABCC10;AQP3;AP2A2;SLC2A6;SLC2A8;PSMD8;HEPH;SLC22A17;SLCO2B1;FTH1;PSMD3;BSG;SLC26A11;CLIC2;SLC16A3;ABCD1;SLC39A3;ABCC3;ATP6V0B;ABCC2;SLC7A5;PRKAR1B;CPTP;SLC25A10;SLC25A11;ATP6V0C;FTL;SLC27A4;SLC45A3;ABCB6;SLC66A1;ARL2;ABCB8;FURIN;SLC3A2;ABCB9;SLC1A5;ADCY7;PSMA7;LMF2;LMF1;CYB5R2;PSMB6;TRPM2;CLN3;SLC25A29;PSMB5;HMOX1;LRRC8A;PLTP;SLC25A22;CAMK2G;LRRC8…
Plasma Lipoprotein Remodeling	4/34	11.76	0.502455	0.835982	1.1101	0.764	FURIN;PLTP;LMF2;LMF1
RIPK1-mediated Regulated Necrosis	4/34	11.76	0.502455	0.835982	1.1101	0.764	CDC37;TRAF2;STUB1;BIRC3
Late Endosomal Microautophagy	4/34	11.76	0.502455	0.835982	1.1101	0.764	MVB12A;PLIN3;CHMP6;VPS28
RAF Activation	4/34	11.76	0.502455	0.835982	1.1101	0.764	MAP2K2;SRC;CAMK2G;MAP3K11
SLC-mediated Transmembrane Transport	27/249	10.84	0.506326	0.841616	1.0125	0.6891	SLC25A1;SLC45A3;SLC2A1;ARL2;SLC3A2;SLC4A2;SLC7A11;SLC1A5;SLC4A3;SLC2A6;SLC2A8;SLC25A29;HEPH;SLCO2B1;BSG;SLC26A11;SLC16A3;SLC25A22;SLC39A3;SLC12A4;SLC8B1;SLC6A6;SLC7A5;SLC25A10;SLC25A11;SLC26A6;SLC27A4
Centrosome Maturation	9/81	11.11	0.507952	0.842705	1.0407	0.7049	MZT2B;MZT2A;HAUS7;SSNA1;CEP131;TUBGCP6;HAUS5;TUBB4B;TUBA4A
Recruitment of Mitotic Centrosome Proteins and Complexes	9/81	11.11	0.507952	0.842705	1.0407	0.7049	MZT2B;MZT2A;HAUS7;SSNA1;CEP131;TUBGCP6;HAUS5;TUBB4B;TUBA4A
Signaling by EGFR in Cancer	3/25	12	0.511384	0.842765	1.1353	0.7614	SHC1;EGF;CDC37
Signaling by NTRK2 (TRKB)	3/25	12	0.511384	0.842765	1.1353	0.7614	SHC1;SRC;BDNF
Gap-filling DNA Repair Synthesis and Ligation in GG-NER	3/25	12	0.511384	0.842765	1.1353	0.7614	POLD4;LIG1;POLD1
G Beta Gamma Signalling Through PI3Kgamma	3/25	12	0.511384	0.842765	1.1353	0.7614	AKT2;GNB2;AKT1
ADP Signalling Through P2Y Purinoceptor 1	3/25	12	0.511384	0.842765	1.1353	0.7614	SRC;GNA11;GNB2
Metabolism of Cofactors	3/25	12	0.511384	0.842765	1.1353	0.7614	COQ4;AKT1;COQ8B
Glycogen Metabolism	3/25	12	0.511384	0.842765	1.1353	0.7614	PYGB;GBE1;GAA
Spry Regulation of FGF Signaling	2/16	12.5	0.524327	0.847527	1.1893	0.7679	SRC;MAPK3
Smooth Muscle Contraction	5/44	11.36	0.516566	0.847527	1.0673	0.705	MYL6;TPM2;DYSF;MYL6B;SORBS3
PI3K Events in ERBB2 Signaling	2/16	12.5	0.524327	0.847527	1.1893	0.7679	EGF;NRG1
Elevation of Cytosolic Ca2+ Levels	2/16	12.5	0.524327	0.847527	1.1893	0.7679	P2RX6;ORAI1
TRAF6-mediated Induction of TAK1 Complex Within TLR4 Complex	2/16	12.5	0.524327	0.847527	1.1893	0.7679	LY96;TAB1
Defects of Contact Activation System (CAS) and Kallikrein Kinin System (KKS)	2/16	12.5	0.524327	0.847527	1.1893	0.7679	VWF;F12
Maturation of Nucleoprotein 9694631	2/16	12.5	0.524327	0.847527	1.1893	0.7679	PARP10;PRMT1
MAP3K8 (TPL2)-dependent MAPK1 3 Activation	2/16	12.5	0.524327	0.847527	1.1893	0.7679	TNIP2;IKBKG
FOXO-mediated Transcription of Cell Death Genes	2/16	12.5	0.524327	0.847527	1.1893	0.7679	PINK1;BBC3
STING Mediated Induction of Host Immune Responses	2/16	12.5	0.524327	0.847527	1.1893	0.7679	IRF3;NLRP4
mRNA Decay by 3' to 5' Exoribonuclease	2/16	12.5	0.524327	0.847527	1.1893	0.7679	EXOSC5;EXOSC4
GRB2 Events in ERBB2 Signaling	2/16	12.5	0.524327	0.847527	1.1893	0.7679	EGF;NRG1
Polo-like Kinase Mediated Events	2/16	12.5	0.524327	0.847527	1.1893	0.7679	LIN37;MYBL2
Peroxisomal Protein Import	7/63	11.11	0.520237	0.847527	1.0406	0.68	ACOT8;PEX6;ECH1;TYSND1;ACOX3;CRAT;PEX14
Translation of Structural Proteins 9694635	7/63	11.11	0.520237	0.847527	1.0406	0.68	PARP10;PRKCSH;PRMT1;MGAT4B;MOGS;ST6GALNAC4;ST3GAL3
Oncogenic MAPK Signaling	9/82	10.98	0.523267	0.847527	1.0264	0.6647	MAP2K2;VWF;SRC;LMNA;AGTRAP;CSK;CAMK2G;MAP3K11;MAPK3
RHOBTB GTPase Cycle	4/35	11.43	0.525984	0.847527	1.0742	0.6902	GPS1;ACTN1;CDC37;DBN1
Diseases of Immune System	4/35	11.43	0.525984	0.847527	1.0742	0.6902	NFKBIA;LY96;IKBKG;NFKB2
N-glycan Trimming in the ER and Calnexin Calreticulin Cycle	4/35	11.43	0.525984	0.847527	1.0742	0.6902	UBXN1;PRKCSH;MOGS;ENGASE
Oncogene Induced Senescence	4/35	11.43	0.525984	0.847527	1.0742	0.6902	MOV10;ID1;ERF;MAPK3
GPVI-mediated Activation Cascade	4/35	11.43	0.525984	0.847527	1.0742	0.6902	RAC2;RHOG;LAT;RHOB
CRMPs in Sema3A Signaling	2/16	12.5	0.524327	0.847527	1.1893	0.7679	FES;PLXNA3
InlB-mediated Entry of Listeria Monocytogenes Into Host Cell	2/16	12.5	0.524327	0.847527	1.1893	0.7679	HGS;SH3GL1
Diseases Associated With the TLR Signaling Cascade	4/35	11.43	0.525984	0.847527	1.0742	0.6902	NFKBIA;LY96;IKBKG;NFKB2
Insulin Receptor Signalling Cascade	6/54	11.11	0.52791	0.849056	1.0406	0.6648	SHC1;AKT2;TRIB3;FGFR4;FGFR3;MAPK3
NR1H2 and NR1H3-mediated Signaling	6/54	11.11	0.52791	0.849056	1.0406	0.6648	EEPD1;MOV10;RXRA;NR1H2;GPS2;PLTP
Interferon Signaling	30/280	10.71	0.53124	0.85362	0.9989	0.6318	IFI35;IFI30;FAAP20;TUBA1C;MT2A;TUBB6;TUBB3;TRIM3;FLNA;FLNB;IKBKG;CAMK2G;GBP1;FAAP100;GBP3;MAPK3;SEC13;SPHK1;TYK2;TUBB4B;TARBP2;TUBA4A;SMAD7;BST2;ISG20;TUBB2B;TUBB2A;IRF3;IRF1;PIN1
Defective HLCS Causes Multiple Carboxylase Deficiency	1/7	14.29	0.548087	0.855062	1.3875	0.8343	PC
[truncated: 655 more rows]

## Sheet: Panther_UP
PANTHER 2016 | Upregulated DEGs | Sorted by Adjusted P-value | Bold = shown in figure
[truncated: 100 more rows]

[truncated: 17 more sheets: MSigDB_Hallmark_UP, KEGG_UP, GO_BioProcess_UP, BioPlanet_UP, ARCHS4_Kinases_UP, ARCHS4_Kinases_DN, BioPlanet_DN, Elsevier_DN, GO_BioProcess_DN, GO_CellComp_DN, GO_MolFunc_DN, KEA_DN, MGI_Phenotype_DN, MSigDB_Hallmark_DN, NCI_Nature_DN, Reactome_DN, WikiPathways_DN]
