# Supplementary material
Source: Research Square preprint supplement (doi:10.21203/rs.3.rs-9577216/v1)
Supplement: Supplementary file 12 [file d05ccfaa70754d9e2257237a.xlsx]

## Sheet: Validation_Screening
Supplementary Table 2. Validation screening: determination of cell viability with and without P5091 (79 compounds)
MM27 cells | DMSO vs P5091 (5 µM, 48 h) + compound library (1 µM, 72 h) | Cell viability normalized to DMSO (CyQUANT)
Mean and SD of triplicate measurements per compound. Compounds grouped by pharmacological class, sorted by original compound ID within each class. Colors reflect compound class.
Compound number	Compound class	Compound name	DMSO + compound — Mean	DMSO + compound — SD	P5091 + compound — Mean	P5091 + compound — SD
133	Antinflammatory Drugs	Mycophenolate mofetil	0.4113	0.0542	0.2573	0.0219
208	Antinflammatory Drugs	Mycophenolic acid	0.5287	0.0648	0.326	0.0214
211	Antinflammatory Drugs	Diphenyleneiodonium chloride	0.725	0.0907	0.5063	0.0489
217	Antinflammatory Drugs	Auranofin	0.4057	0.0211	0.1443	0.0068
232	Antinflammatory Drugs	Bay 11-7085	0.8717	0.1057	0.5827	0.0561
452	Antinflammatory Drugs	Bardoxolone Methyl	0.0913	0.0038	0.0777	0.0031
16	Cardiovascular Agents	Strophanthidin	0.6723	0.0806	0.4413	0.0335
152	Cardiovascular Agents	Ouabain	0.1527	0.0105	0.1157	0.0076
206	Cardiovascular Agents	Imazodan	0.628	0.035	0.39	0.0156
271	Cardiovascular Agents	Digitoxin	0.1383	0.006	0.11	0.0035
302	Cardiovascular Agents	Anagrelide hydrochloride	0.0633	0.0031	0.0637	0.0015
316	Cardiovascular Agents	Digoxin	0.9257	0.0194	0.538	0.0453
13	Chemotherapic Agents	10-Hydroxycamptothecin	0.1793	0.0042	0.13	0.0046
55	Chemotherapic Agents	Pyridostatin	0.794	0.0732	0.462	0.0296
97	Chemotherapic Agents	Dactinomycin	0.0783	0.0029	0.0767	0.0006
106	Chemotherapic Agents	Mitomycin C	0.4987	0.0407	0.3453	0.03
147	Chemotherapic Agents	Amsacrine hydrochloride	0.3513	0.0333	0.2417	0.0136
191	Chemotherapic Agents	Camptothecin	0.222	0.0175	0.1587	0.011
215	Chemotherapic Agents	Idarubicin	0.0733	0.0012	0.072	0.0036
223	Chemotherapic Agents	5-Bromo-2'-deoxyuridine	0.559	0.0616	0.3393	0.0153
283	Chemotherapic Agents	Epirubicin hydrochloride	0.1753	0.0227	0.1347	0.0038
301	Chemotherapic Agents	Doxorubicin	0.0613	0.0045	0.0623	0.0015
309	Chemotherapic Agents	Cytarabine	0.3747	0.029	0.225	0.0417
340	Chemotherapic Agents	Docetaxel	0.2707	0.0045	0.1913	0.0161
348	Chemotherapic Agents	Vinorelbine	0.2313	0.0239	0.1517	0.0168
403	Chemotherapic Agents	Cabazitaxel (Jevtana)	0.2847	0.0146	0.226	0.0173
416	Chemotherapic Agents	Clofarabine	0.467	0.0662	0.2863	0.0153
459	Chemotherapic Agents	Combretastatin A4	0.245	0.0161	0.1683	0.0259
57	Epigenetic Compounds	Scriptaid	0.521	0.0566	0.2973	0.0195
63	Epigenetic Compounds	M344	0.4267	0.0477	0.2607	0.0178
65	Epigenetic Compounds	CPI-203	0.3173	0.0274	0.1997	0.0203
74	Epigenetic Compounds	SP2509	0.4063	0.0551	0.267	0.0286
82	Epigenetic Compounds	THZ1	0.0653	0.0045	0.0693	0.0023
362	Epigenetic Compounds	BIX 01294 trihydrochloride hydrate	0.8923	0.0578	0.5313	0.0726
381	Epigenetic Compounds	Vorinostat	0.6447	0.0405	0.3813	0.048
417	Epigenetic Compounds	Panobinostat	0.066	0.0026	0.0637	0.0021
418	Epigenetic Compounds	Belinostat (PXD101)	0.2627	0.0244	0.1873	0.014
433	Epigenetic Compounds	Domatinostat (4SC-202)	0.6463	0.0284	0.3947	0.0562
18	Others	Alpha-amanitin	0.5133	0.0884	0.313	0.0266
39	Others	Picropodophylin	0.267	0.0495	0.179	0.0036
64	Others	Aphidicolin	0.534	0.0332	0.3497	0.035
141	Others	Artesunate	0.9803	0.0756	0.6463	0.0117
163	Others	Phenylmercuric acetate	0.073	0.001	0.069	0.001
167	Others	Dequalinium chloride hydrate	0.7743	0.0497	0.4967	0.0086
170	Others	BNTX maleate salt hydrate	0.7867	0.114	0.4783	0.0546
172	Others	Aminacrine	0.8097	0.0949	0.4947	0.0275
192	Others	CGS-15943	0.9853	0.0753	0.6233	0.0258
2	Targeted-therapy Compounds	PHA-680632	0.7273	0.0452	0.451	0.0165
32	Targeted-therapy Compounds	Peruvoside	0.1193	0.005	0.1017	0.0025
37	Targeted-therapy Compounds	ENMD-2076 L-(+)-Tartaric acid	0.5447	0.0679	0.362	0.0301
45	Targeted-therapy Compounds	TH588	0.5987	0.0583	0.3597	0.014
49	Targeted-therapy Compounds	Anisomycin	0.2043	0.0158	0.118	0.001
54	Targeted-therapy Compounds	PIP-199	0.974	0.1024	0.5883	0.0255
107	Targeted-therapy Compounds	TG101209	0.6957	0.0581	0.4123	0.0145
197	Targeted-therapy Compounds	NSC 95397	0.9693	0.0961	0.598	0.0231
248	Targeted-therapy Compounds	IC261	0.666	0.0297	0.4183	0.0211
262	Targeted-therapy Compounds	Stattic	0.7533	0.1472	0.4073	0.0126
280	Targeted-therapy Compounds	Emetine	0.169	0.02	0.1387	0.0087
350	Targeted-therapy Compounds	Dasatinib	0.689	0.0699	0.5277	0.0855
383	Targeted-therapy Compounds	Palbociclib	0.514	0.0383	0.2857	0.0051
384	Targeted-therapy Compounds	Ponatinib	0.1943	0.0352	0.1393	0.0086
385	Targeted-therapy Compounds	Dabrafenib (GSK2118436)	0.1653	0.0337	0.094	0.0053
386	Targeted-therapy Compounds	LY2090314	0.705	0.0654	0.362	0.0806
390	Targeted-therapy Compounds	Axitinib	0.8047	0.0607	0.475	0.0702
394	Targeted-therapy Compounds	Carfilzomib (PR-171)	0.0877	0.0076	0.0803	0.0025
399	Targeted-therapy Compounds	Bosutinib (SKI-606)	1.0003	0.0555	0.5917	0.0919
400	Targeted-therapy Compounds	Crizotinib (PF-02341066)	0.6583	0.0274	0.4273	0.0675
420	Targeted-therapy Compounds	Trametinib (GSK1120212)	0.123	0.0036	0.085	0.0017
427	Targeted-therapy Compounds	RDEA119	0.134	0.014	0.0873	0.0061
428	Targeted-therapy Compounds	Vemurafenib	0.2797	0.0432	0.2097	0.0165
432	Targeted-therapy Compounds	GDC-0994	0.1947	0.0199	0.141	0.0139
442	Targeted-therapy Compounds	LY3009120	0.177	0.0128	0.127	0.0255
444	Targeted-therapy Compounds	MI-773 (SAR405838)	0.1523	0.0093	0.1177	0.0071
449	Targeted-therapy Compounds	PND-1186 (VS-4718)	0.628	0.0418	0.4063	0.0482
450	Targeted-therapy Compounds	Dovitinib (TKI258) Lactate	0.3917	0.0263	0.222	0.0329
451	Targeted-therapy Compounds	AT7519 HCl	0.2367	0.0204	0.175	0.0289
453	Targeted-therapy Compounds	Cerdulatinib (PRT062070, PRT2070)	0.807	0.0602	0.4613	0.0535
455	Targeted-therapy Compounds	Sunitinib	0.9923	0.0038	0.6843	0.0862
456	Targeted-therapy Compounds	Afatinib (BIBW2992) Dimeleate	1.1073	0.0512	0.652	0.0722
Color legend:
Chemotherapic Agents
Epigenetic Compounds
Targeted-therapy Compounds
Antinflammatory Drugs
Cardiovascular Agents
Others
