# Supplementary material
Source: Research Square preprint supplement (doi:10.21203/rs.3.rs-9577216/v1)
Supplement: Supplementary file 13 [file de226cffc5aee704d917a915.xlsx]

## Sheet: Synergy_Index
Supplementary Table 3. Synergy index of 54 validation screening hits
Synergy index = viability (DMSO + compound) / viability (P5091 + compound)
Higher synergy index indicates greater selective activity against senescent (P5091-treated) cells. Compounds grouped by pharmacological class, sorted by synergy index (descending) within class.
Compound number	Compound class	Compound name	Synergy index
217	Antinflammatory Drugs	Auranofin	2.81
208	Antinflammatory Drugs	Mycophenolic acid	1.62
133	Antinflammatory Drugs	Mycophenolate mofetil	1.6
452	Antinflammatory Drugs	Bardoxolone Methyl	1.18
206	Cardiovascular Agents	Imazodan	1.61
152	Cardiovascular Agents	Ouabain	1.32
271	Cardiovascular Agents	Digitoxin	1.26
302	Cardiovascular Agents	Anagrelide hydrochloride	1
309	Chemotherapic Agents	Cytarabine	1.66
223	Chemotherapic Agents	5-Bromo-2'-deoxyuridine	1.65
416	Chemotherapic Agents	Clofarabine	1.63
348	Chemotherapic Agents	Vinorelbine	1.52
147	Chemotherapic Agents	Amsacrine hydrochloride	1.45
459	Chemotherapic Agents	Combretastatin A4	1.45
106	Chemotherapic Agents	Mitomycin C	1.45
340	Chemotherapic Agents	Docetaxel	1.41
191	Chemotherapic Agents	Camptothecin	1.4
13	Chemotherapic Agents	10-Hydroxycamptothecin	1.38
283	Chemotherapic Agents	Epirubicin hydrochloride	1.3
403	Chemotherapic Agents	Cabazitaxel (Jevtana)	1.26
97	Chemotherapic Agents	Dactinomycin	1.02
215	Chemotherapic Agents	Idarubicin	1.02
301	Chemotherapic Agents	Doxorubicin	0.99
57	Epigenetic Compounds	Scriptaid	1.75
381	Epigenetic Compounds	Vorinostat	1.69
433	Epigenetic Compounds	Domatinostat (4SC-202)	1.64
63	Epigenetic Compounds	M344	1.64
65	Epigenetic Compounds	CPI-203	1.59
74	Epigenetic Compounds	SP2509	1.52
418	Epigenetic Compounds	Belinostat (PXD101)	1.4
417	Epigenetic Compounds	Panobinostat	1.04
82	Epigenetic Compounds	THZ1	0.94
18	Others	Alpha-amanitin	1.64
64	Others	Aphidicolin	1.53
39	Others	Picropodophylin	1.49
163	Others	Phenylmercuric acetate	1.06
386	Targeted-therapy Compounds	LY2090314	1.95
383	Targeted-therapy Compounds	Palbociclib	1.8
450	Targeted-therapy Compounds	Dovitinib (TKI258) Lactate	1.77
385	Targeted-therapy Compounds	Dabrafenib (GSK2118436)	1.76
49	Targeted-therapy Compounds	Anisomycin	1.74
45	Targeted-therapy Compounds	TH588	1.66
427	Targeted-therapy Compounds	RDEA119	1.53
37	Targeted-therapy Compounds	ENMD-2076 L-(+)-Tartaric acid	1.5
420	Targeted-therapy Compounds	Trametinib (GSK1120212)	1.45
384	Targeted-therapy Compounds	Ponatinib	1.4
442	Targeted-therapy Compounds	LY3009120	1.39
432	Targeted-therapy Compounds	GDC-0994	1.38
451	Targeted-therapy Compounds	AT7519 HCl	1.35
428	Targeted-therapy Compounds	Vemurafenib	1.33
444	Targeted-therapy Compounds	MI-773 (SAR405838)	1.3
280	Targeted-therapy Compounds	Emetine	1.22
32	Targeted-therapy Compounds	Peruvoside	1.18
394	Targeted-therapy Compounds	Carfilzomib (PR-171)	1.09
