# Supplementary material
Source: Research Square preprint supplement (doi:10.21203/rs.3.rs-9577216/v1)
Supplement: Supplementary file 14 [file deab03d4a48df0aabd7e2cee.xlsx]

## Sheet: INDEX
Supplementary Table 8. MM13 - DEG Lists and EnrichR Analysis (Vol. + Aur. vs DMSO)
Sheet	Database	Direction	Total pathways	Significant (adj.p<0.05)	In figure
DEG_up1	DEG list	Upregulated	345
DEG_dn1	DEG list	Downregulated	467
ARCHS4_Kinases_UP	ARCHS4 Kinases Coexpression	Upregulated	436	11	1
BioPlanet_UP	BioPlanet 2019	Upregulated	595	89	0
GO_BioProcess_UP	GO Biological Process 2025	Upregulated	1738	15	3
KEGG_UP	KEGG 2026	Upregulated	244	37	0
MSigDB_Hallmark_UP	MSigDB Hallmark 2020	Upregulated	46	17	4
Panther_UP	PANTHER 2016	Upregulated	52	3	0
Reactome_UP	Reactome Pathways 2024	Upregulated	756	20	4
WikiPathways_UP	WikiPathways 2024 Human	Upregulated	405	83	4
ARCHS4_Kinases_DN	ARCHS4 Kinases Coexpression	Downregulated	472	48	4
BioPlanet_DN	BioPlanet 2019	Downregulated	597	73	0
GO_BioProcess_DN	GO Biological Process 2025	Downregulated	1729	166	4
GO_CellComp_DN	GO Cellular Component 2025	Downregulated	170	19	1
GO_MolFunc_DN	GO Molecular Function 2025	Downregulated	333	13	0
KEA_DN	KEA 2015	Downregulated	115	15	0
MGI_Phenotype_DN	MGI Mammalian Phenotype L4	Downregulated	2126	38	0
MSigDB_Hallmark_DN	MSigDB Hallmark 2020	Downregulated	45	7	3
NCI_Nature_DN	NCI-Nature 2016	Downregulated	81	10	0
Reactome_DN	Reactome Pathways 2024	Downregulated	894	228	0

## Sheet: DEG_up1
MM13 Upregulated DEGs Vol. + Aur. vs DMSO | log2FC > 1
Total genes: 345 | Sorted by adjusted P-value
Gene	Base Mean	log2 Fold Change	lfcSE	P-value	Adjusted P-value
HMOX1	53185.7	5.1394	0.1164	0	1e-197
SLC7A11	2867.93	3.2414	0.1073	1.18481e-200	9.77583e-197
C15orf48	634.718	3.5267	0.1274	9.27301e-169	5.10077e-165
SOD2	10276.9	2.036	0.083	7.02195e-133	2.89691e-129
CXCL8	989.752	4.8197	0.2022	1.29104e-125	4.26094e-122
AKR1C1	297.143	3.3616	0.1559	3.76706e-103	1.03607e-99
TRIM16	716.074	2.1637	0.1011	1.07729e-101	2.53964e-98
GCLM	5449.19	1.7897	0.0844	8.24664e-100	1.70108e-96
TRIM16L	812.861	2.7914	0.1339	1.62988e-96	2.98848e-93
KYNU	495.548	2.3718	0.1206	4.39983e-86	6.60054e-83
FTL	103984	1.627	0.0842	3.25193e-83	4.47195e-80
BIRC3	1409.28	3.1273	0.1676	1.02868e-77	1.30579e-74
DDIT3	1038.56	2.4271	0.1319	1.2762e-75	1.40399e-72
TFPI2	7061.54	2.2072	0.1229	4.56398e-72	4.43028e-69
ICAM1	2377.18	2.5288	0.1417	3.07258e-71	2.81687e-68
ZFAND2A	1316.32	3.1293	0.1762	1.41308e-70	1.2273e-67
SPP1	1761.46	2.0302	0.1148	5.87229e-70	4.84523e-67
MMP3	200.191	4.0381	0.23	5.59197e-69	4.19449e-66
LOC107986820	1505.27	1.8025	0.1056	2.87114e-65	1.89518e-62
SRXN1	3429.01	1.4222	0.084	2.42733e-64	1.54061e-61
TALDO1	6455.74	1.279	0.0768	2.85307e-62	1.62349e-59
HSPA6	733.121	8.6412	0.5302	1.04134e-59	5.72808e-57
TXNRD1	52334.9	1.2841	0.0791	3.22586e-59	1.7172e-56
TIMP1	5762.73	1.7715	0.1158	7.76397e-53	2.97956e-50
NFKBIA	1199.21	1.349	0.0893	1.31254e-51	4.81324e-49
NQO1	15087.7	1.4264	0.0968	3.72322e-49	1.30725e-46
GCNT2	2671.09	1.3311	0.0928	1.19907e-46	3.66426e-44
IL7R	281.205	2.335	0.1631	1.68413e-46	5.05301e-44
MLLT11	256.981	2.5324	0.1774	3.12073e-46	9.19612e-44
SAT1	2255.25	1.6238	0.1144	9.42964e-46	2.6829e-43
NFKBIE	480.602	1.5726	0.1117	5.21778e-45	1.38877e-42
TRIB3	749.558	1.7388	0.1253	8.87618e-44	2.21931e-41
SLC3A2	1909.78	1.2615	0.0922	1.26951e-42	3.03616e-40
GLA	1125	1.8746	0.1374	2.22629e-42	5.24832e-40
CYB5R1	1275.45	1.0557	0.0776	3.41098e-42	7.92789e-40
LINC00520	1225.64	1.4894	0.1099	7.22091e-42	1.65499e-39
KCNE4	318.248	2.0607	0.1528	1.79005e-41	4.0465e-39
PNLIPRP3	727.472	1.352	0.1009	6.26148e-41	1.39631e-38
TUBA4A	232.468	2.3363	0.1744	6.57119e-41	1.44584e-38
SEL1L3	941.227	1.3131	0.0985	1.67635e-40	3.63988e-38
PRNP	17376.9	1.0463	0.0803	7.58556e-39	1.52655e-36
IL1B	2889.18	1.4831	0.1145	2.13399e-38	4.14296e-36
IQCG	352.715	1.7967	0.1392	3.97346e-38	7.53679e-36
TRAF1	393.457	2.2779	0.1768	5.57391e-38	1.03349e-35
SQSTM1	28674.9	1.3336	0.104	1.12961e-37	2.04845e-35
GSR	2775.58	1.1247	0.0879	1.76889e-37	3.17285e-35
IFRD1	1310.64	1.5655	0.1277	1.44492e-34	2.18753e-32
ENPP2	374.646	1.4451	0.1185	3.1356e-34	4.61997e-32
GSTM3	1341.97	1.2479	0.1035	1.70478e-33	2.48958e-31
IRAK2	457.315	1.5622	0.1309	8.06326e-33	1.12763e-30
SERPINE1	24449.2	1.1888	0.1005	2.64788e-32	3.64128e-30
NMRAL2P	72.724	4.4243	0.3741	2.85047e-32	3.85561e-30
NUPR1	289.819	2.19	0.1863	6.71355e-32	8.93443e-30
PIR	227.846	2.0108	0.1722	1.6274e-31	2.1146e-29
IL6	142.032	2.4194	0.2123	4.38302e-30	5.20349e-28
NFKB2	268.623	1.6382	0.1461	3.47981e-29	3.85394e-27
TBC1D7	457.896	1.4426	0.1287	3.64821e-29	4.01352e-27
CHAC1	132.171	2.2832	0.2078	4.45647e-28	4.56774e-26
C1S	1261.3	1.2235	0.1118	7.43781e-28	7.52998e-26
CTSS	566.319	1.3826	0.1268	1.08916e-27	1.09594e-25
PPIF	3136.54	1.0966	0.1007	1.34865e-27	1.34881e-25
GLRX	2495.49	1.4436	0.1332	2.27482e-27	2.26139e-25
LINC-PINT	625.669	1.245	0.1156	5.04157e-27	4.92284e-25
GABARAPL1	1350.42	1.3801	0.1291	1.09138e-26	1.04104e-24
AKAP8L	696.958	1.0268	0.0961	1.15735e-26	1.09762e-24
ANKRD1	164.247	2.5919	0.2434	1.79499e-26	1.683e-24
GCNT3	75.444	3.4833	0.3349	2.41469e-25	2.11954e-23
STYK1	109.042	2.2797	0.2197	3.21134e-25	2.78913e-23
CTH	189.085	2.1009	0.2026	3.43725e-25	2.96971e-23
CD82	463.393	1.1195	0.1102	3.16001e-24	2.53138e-22
PTGR1	2285.89	1.0108	0.0995	3.19998e-24	2.55102e-22
MIR3142HG	102.694	2.5815	0.2547	3.77601e-24	2.98142e-22
NFKBIZ	248.61	1.8959	0.1871	3.99309e-24	3.13781e-22
TPRA1	1426.21	1.0787	0.1076	1.23977e-23	9.34185e-22
MIR100HG	218.647	1.5814	0.1582	1.60208e-23	1.20171e-21
SERPINB2	4479.59	1.4378	0.1451	3.77304e-23	2.76723e-21
SLC1A5	708.31	1.3513	0.1401	5.15188e-22	3.58719e-20
LINC02535	354.93	1.2391	0.1286	5.8575e-22	4.02752e-20
GARS1	6020	1.0011	0.1047	1.14195e-21	7.6916e-20
RPLP0P2	133.154	2.0411	0.2136	1.25336e-21	8.40768e-20
HBEGF	442.872	1.2075	0.1265	1.31498e-21	8.78537e-20
ATF3	119.542	2.0999	0.2232	5.1167e-21	3.24753e-19
LOC105374811	108.382	2.8329	0.3031	9.06777e-21	5.64666e-19
TMEM45A	344.474	1.3448	0.1443	1.16126e-20	7.2042e-19
EREG	107.104	1.9207	0.2062	1.20882e-20	7.47112e-19
PACC1	437.772	1.1499	0.1236	1.32049e-20	8.10064e-19
PSAT1	838.256	1.1236	0.1209	1.49737e-20	9.11795e-19
POR	898.697	1.1676	0.1257	1.55636e-20	9.44229e-19
PSPH	564.301	1.0318	0.1133	8.65112e-20	4.99163e-18
MMP1	29728.4	1.1225	0.1237	1.12783e-19	6.43993e-18
PRDX1	12364.2	1.1168	0.1236	1.68506e-19	9.45812e-18
ATF4	5685.84	1.031	0.1153	3.77247e-19	2.08205e-17
AKR1C3	491.688	1.6099	0.1806	4.96963e-19	2.69954e-17
YRDC	348.695	1.2307	0.1381	4.96654e-19	2.69954e-17
CXCL1	78.812	2.2474	0.2554	1.36833e-18	7.16829e-17
SLC28A3	213.55	1.2919	0.1487	3.63216e-18	1.83858e-16
SEPHS2	690.41	1.1587	0.1336	4.09152e-18	2.04601e-16
RAB5IF	400.971	1.3418	0.1548	4.43329e-18	2.21022e-16
PLA2G4C	310.38	1.3537	0.1578	9.62079e-18	4.68325e-16
SLC48A1	510.5	1.1198	0.1308	1.13513e-17	5.47717e-16
AKR1C7P	142.05	1.9274	0.2294	4.36833e-17	2.0249e-15
BRF2	154.539	1.4029	0.1683	7.73402e-17	3.48707e-15
PRSS3	127.433	1.5654	0.188	8.19033e-17	3.68275e-15
FTLP3	2271.46	1.4828	0.1806	2.21444e-16	9.64185e-15
TSPYL2	204.096	1.4942	0.1824	2.60672e-16	1.12903e-14
DDIT4	894.447	1.0085	0.1249	6.72174e-16	2.81528e-14
RELB	70.871	2.3424	0.2902	6.98604e-16	2.9112e-14
CASP1	409.402	1.1996	0.1497	1.0978e-15	4.50645e-14
DGKG	165.34	1.4878	0.1869	1.72903e-15	6.99327e-14
CHPF2	689.945	1.0847	0.1371	2.50547e-15	9.98676e-14
SYNGR2	227.109	1.2853	0.1628	2.90299e-15	1.14605e-13
HSPA4L	452.081	1.1242	0.1444	6.88688e-15	2.63072e-13
MIR137HG	40.41	2.7838	0.3591	9.0364e-15	3.41233e-13
TUFT1	339.907	1.3055	0.1686	9.69683e-15	3.63675e-13
NRCAM	38.232	3.1938	0.4138	1.18297e-14	4.39671e-13
CAB39L	480.789	1.2074	0.1567	1.31821e-14	4.85181e-13
SERTAD1	413.52	1.2303	0.1625	3.67529e-14	1.29776e-12
NR2F1-AS1	261.703	1.4334	0.1902	4.88865e-14	1.70916e-12
ATP6V0D2	166.765	1.6006	0.2133	6.26339e-14	2.1578e-12
ANGPT1	562.261	1.0321	0.1406	2.09559e-13	6.84782e-12
BID	520.178	1.2571	0.173	3.6433e-13	1.14956e-11
TOM1	541.785	1.0547	0.146	4.9669e-13	1.54067e-11
RPP25L	220.399	1.2052	0.1668	4.98231e-13	1.54255e-11
ZFYVE27	343.741	1.1508	0.16	6.46878e-13	1.97681e-11
GADD45B	712.919	1.1085	0.1548	8.03815e-13	2.42054e-11
LINC02522	36.258	2.9549	0.413	8.37729e-13	2.50893e-11
PLPP5	263.03	1.0154	0.1424	9.95237e-13	2.938e-11
ABCC2	219.153	1.3546	0.1902	1.06821e-12	3.11993e-11
ADM	264.454	1.0848	0.1543	2.08423e-12	5.9505e-11
COL27A1	153.738	1.2455	0.1793	3.71029e-12	1.03424e-10
CCL26	91.528	1.6862	0.2432	4.13996e-12	1.14819e-10
OSGIN1	189.779	1.8174	0.2625	4.45042e-12	1.22401e-10
POPDC3	1149.01	1.0594	0.1533	4.89442e-12	1.34166e-10
MAP1LC3B2	140.681	1.266	0.1838	5.68384e-12	1.55033e-10
ATP6V0A4	280.179	1.0284	0.1495	5.9838e-12	1.62677e-10
COX19	414.85	1.0102	0.1468	5.98238e-12	1.62677e-10
SESN2	387.429	1.1032	0.1609	7.07851e-12	1.89626e-10
ALKBH6	180.078	1.1299	0.1659	9.8239e-12	2.56104e-10
TMEM17	112.419	1.2728	0.1872	1.04949e-11	2.71879e-10
TMOD1	150.787	1.4517	0.2157	1.71119e-11	4.331e-10
DNAJA4	528.719	1.464	0.2176	1.72171e-11	4.35093e-10
ST6GALNAC4	134.783	1.5228	0.2285	2.65127e-11	6.53726e-10
BEX2	234.645	1.016	0.1527	2.8342e-11	6.95983e-10
DNAJB4	1602.42	1.2973	0.1959	3.51935e-11	8.54062e-10
SIRT4	111.417	1.4525	0.2213	5.26996e-11	1.2477e-09
SLC6A6	479.606	1.0548	0.1608	5.42514e-11	1.2826e-09
IL32	22.947	3.4395	0.5246	5.51747e-11	1.29885e-09
ADRM1	952.159	1.1211	0.171	5.54485e-11	1.30344e-09
HSPA7	33.527	8.1107	1.2461	7.57563e-11	1.75827e-09
LOC101928146	66.43	1.8447	0.2871	1.32187e-10	2.97592e-09
PCOLCE2	110.452	1.3232	0.2072	1.71273e-10	3.80396e-09
TMEM132A	104.541	1.4541	0.2317	3.50219e-10	7.44758e-09
IL20RB	117.875	1.4246	0.2272	3.60413e-10	7.65448e-09
HSCB	284.169	1.0877	0.1738	3.92561e-10	8.30517e-09
AFP	91.419	2.0216	0.3239	4.33663e-10	9.09314e-09
HSPB8	72.604	1.6827	0.2702	4.704e-10	9.80119e-09
LNCOG	50.062	2.029	0.3268	5.34136e-10	1.09767e-08
NMNAT1	159.034	1.154	0.1883	8.79343e-10	1.7589e-08
ALDH1L2	93.462	1.5228	0.2493	1.00399e-09	1.99373e-08
LINC00942	18.972	4.2161	0.6905	1.02439e-09	2.03178e-08
LOC101928994	159.491	1.2871	0.2109	1.04178e-09	2.06133e-08
UNKL	104.672	1.3364	0.2194	1.12115e-09	2.21043e-08
TMEM265	73.558	1.6353	0.2697	1.33158e-09	2.58818e-08
LUCAT1	42.676	2.0971	0.3462	1.38351e-09	2.67652e-08
C3	873.097	1.4143	0.2343	1.58164e-09	3.0213e-08
MAP2	125.892	1.3685	0.2277	1.86177e-09	3.52327e-08
ASNS	31.838	2.2517	0.375	1.91487e-09	3.6196e-08
MAP3K2-DT	28.732	2.4228	0.4151	5.33628e-09	9.44843e-08
IL13RA2	501.981	1.1626	0.1996	5.69635e-09	1.00321e-07
CRISPLD2	62.493	1.5685	0.2698	6.13265e-09	1.07204e-07
SCARNA6	1793.66	1.0629	0.1864	1.18905e-08	1.98199e-07
LINC02154	31.966	2.141	0.3769	1.34839e-08	2.22735e-07
ZMAT5	297.209	1.0383	0.184	1.67084e-08	2.72992e-07
TRIM47	117.744	1.0081	0.1811	2.58167e-08	4.10431e-07
FBXO6	130.801	1.0323	0.1878	3.88786e-08	6.04119e-07
ABCB1	14.468	3.9942	0.7268	3.89297e-08	6.04344e-07
SNORA74A	662.971	1.0517	0.1921	4.38016e-08	6.73639e-07
LOC105379524	220.811	1.0774	0.1972	4.69521e-08	7.18742e-07
ATF4P4	103.463	1.1595	0.2123	4.7044e-08	7.19481e-07
ATP6V0B	1071.19	1.028	0.1884	4.8252e-08	7.37273e-07
FTLP2	326.637	1.2348	0.2275	5.72967e-08	8.6744e-07
CXCL5	16.045	5.0266	0.9283	6.12692e-08	9.25884e-07
TGFB2	76.208	1.3027	0.2407	6.22685e-08	9.40124e-07
LOC105373416	64.353	1.6411	0.3045	7.04498e-08	1.05496e-06
PTPRR	868.875	1.2859	0.2393	7.71991e-08	1.1446e-06
LURAP1L-AS1	31.972	2.5509	0.4757	8.21736e-08	1.21182e-06
ANKRD39	100.345	1.365	0.2569	1.07628e-07	1.55933e-06
TNFRSF9	14.943	3.825	0.7222	1.18437e-07	1.69665e-06
CSF2	18.572	2.6904	0.5106	1.37006e-07	1.93402e-06
BEST3	105.076	1.0589	0.2024	1.66993e-07	2.31573e-06
ABHD4	988.947	1.0108	0.194	1.87373e-07	2.57669e-06
LOC105376114	49.781	1.5814	0.3062	2.40663e-07	3.23669e-06
CRYM	15.812	3.4019	0.6593	2.47195e-07	3.31644e-06
ID3	84.345	1.41	0.2736	2.56492e-07	3.4291e-06
JUNB	65.809	1.4557	0.283	2.69994e-07	3.59309e-06
NFKBIB	85.233	1.1766	0.2298	3.05045e-07	4.03031e-06
MIR5689HG	44.087	1.8923	0.3715	3.52248e-07	4.5951e-06
SLC12A8	83.674	1.3489	0.265	3.58543e-07	4.66984e-06
ZNF300P1	134.17	1.0415	0.2052	3.86695e-07	5.00489e-06
PRDX1P1	49.564	1.4879	0.2958	4.88792e-07	6.17614e-06
BCAS4	75.87	1.119	0.2227	5.01099e-07	6.30751e-06
CXCL3	24.166	2.379	0.4737	5.11663e-07	6.43556e-06
LIMD2	108.892	1.4387	0.2865	5.15109e-07	6.47398e-06
LOC284344	158.132	1.0313	0.2055	5.20649e-07	6.53862e-06
SYP	16.086	3.099	0.6204	5.8844e-07	7.29157e-06
APOLD1	99.675	1.1159	0.2264	8.29961e-07	1.00632e-05
TM4SF19	92.001	1.0826	0.2197	8.33835e-07	1.00953e-05
NUP50-DT	61.888	1.3937	0.2843	9.46403e-07	1.13253e-05
CCL20	25.071	2.4339	0.4987	1.05543e-06	1.25031e-05
SDSL	148.036	1.0551	0.2168	1.14079e-06	1.34084e-05
MEIOC	50.028	1.4437	0.2978	1.25375e-06	1.45906e-05
CD34	30.581	1.6896	0.3493	1.31337e-06	1.52522e-05
MYCT1	94.756	1.2819	0.2661	1.45756e-06	1.68082e-05
CLIC2	48.29	1.8916	0.3971	1.90396e-06	2.152e-05
LOC105371267	32.645	2.2185	0.4694	2.28857e-06	2.54316e-05
LOC105369748	17.387	2.7833	0.5895	2.34416e-06	2.59098e-05
MIR193BHG	35.417	1.8316	0.389	2.49559e-06	2.74183e-05
OASL	49.503	1.3977	0.2972	2.55996e-06	2.80508e-05
LOC105374027	13.681	3.3298	0.7177	3.48891e-06	3.71206e-05
NECAB3	92.558	1.0486	0.2284	4.41443e-06	4.61934e-05
LOC112268163	40.626	1.5101	0.3305	4.89307e-06	5.06558e-05
BATF2	62.676	1.3407	0.2963	6.0469e-06	6.1369e-05
TFEC	52.988	1.6899	0.3799	8.67125e-06	8.46203e-05
UCHL1	8.408	5.7966	1.3044	8.83658e-06	8.59289e-05
DYNC1I1	32.084	1.8383	0.4137	8.85556e-06	8.6012e-05
CLDN1	46.976	1.4341	0.3315	1.51491e-05	0.000138604
LINC02085	16.288	2.7043	0.6257	1.54569e-05	0.000141235
MAP3K10	42.902	1.2471	0.2888	1.57929e-05	0.000143827
ICAM2	55.906	1.2274	0.2858	1.75124e-05	0.000157745
LIPH	38.6	1.6734	0.3905	1.8227e-05	0.00016338
LINC01089	14.315	2.3357	0.5488	2.08285e-05	0.000185186
LOC257396	89.646	1.0736	0.2536	2.29989e-05	0.000202081
LINC00910	22.095	2.103	0.4977	2.38798e-05	0.000208942
ANGPTL4	22.141	1.8942	0.4506	2.62813e-05	0.00022778
LOC101927330	25.849	1.4985	0.3569	2.69035e-05	0.00023197
DLGAP1-AS2	85.582	1.2473	0.2971	2.68683e-05	0.00023197
VAMP1	44.595	1.3597	0.3238	2.68578e-05	0.00023197
OAZ3	15.121	2.1578	0.5141	2.70245e-05	0.000232876
ATF4P3	48.673	1.0975	0.2625	2.90378e-05	0.00024876
LOC107984551	14.366	2.3531	0.5633	2.94826e-05	0.000251952
LIN7B	30.129	1.5178	0.364	3.04616e-05	0.000259115
RRAD	161.751	1.041	0.2499	3.096e-05	0.00026308
TMEM182	62.922	1.1524	0.2771	3.19672e-05	0.000270525
CTSW	13.218	2.6534	0.6383	3.22506e-05	0.000272645
HSPB1	295.429	1.2529	0.3015	3.24202e-05	0.000273937
LINC02376	11.799	2.7472	0.6622	3.34703e-05	0.000281799
LINC01204	37.388	1.2918	0.3144	3.97823e-05	0.000329607
RAB43P1	73.66	1.2441	0.303	4.02839e-05	0.000332882
MAP3K14	120.762	1.0877	0.2658	4.28022e-05	0.00035088
TNIP3	9.174	3.7141	0.9104	4.5069e-05	0.000368182
TMEM79	63.683	1.1906	0.294	5.12097e-05	0.000410224
SNORA74B	349.942	1.0428	0.2578	5.21941e-05	0.000416694
ZBTB11-AS1	57.797	1.0864	0.2693	5.47399e-05	0.000435124
PGF	57.047	1.2661	0.3152	5.89233e-05	0.000465018
GNA15	53.328	1.2918	0.3218	5.97323e-05	0.000470727
SPINK1	13.203	2.5107	0.6261	6.06719e-05	0.00047722
GDPD1	57.672	1.2308	0.3079	6.41116e-05	0.000500696
LINC01822	29.051	1.5344	0.384	6.43596e-05	0.000502157
CSF3	5.534	5.8586	1.4694	6.68893e-05	0.000519683
GOLGA7B	62.706	1.0248	0.2572	6.76887e-05	0.000524906
APCDD1L-DT	15.66	2.3668	0.5989	7.75331e-05	0.000589337
SNORA2C	28.738	1.5512	0.3937	8.12604e-05	0.000613993
LOC105379283	42.206	1.3807	0.3548	9.9691e-05	0.000735734
LYPLAL1-DT	26.848	1.5067	0.3883	0.000104099	0.000763826
HERC5	91.417	1.0504	0.2716	0.000109979	0.000801619
NCF2	15.773	2.2889	0.5921	0.00011074	0.0008061
LINC02806	11.935	2.7528	0.7131	0.000113366	0.000824488
XIRP1	13.65	3.4656	0.9031	0.000124291	0.000892927
VNN1	52.431	1.1	0.2871	0.000127312	0.000910725
LIMCH1	15.655	2.1976	0.5756	0.000134695	0.000958185
NEDD8-MDP1	25.13	1.4636	0.3836	0.000136066	0.000966577
LOC105371967	10.85	3.155	0.828	0.000138782	0.000984177
SLC13A3	32.96	1.5418	0.405	0.000140856	0.000996985
TMTC1	17.351	2.0903	0.5495	0.000142386	0.00100542
ZNF790-AS1	46.711	1.1603	0.3051	0.000142756	0.00100673
EGR1	39.08	1.7234	0.4553	0.000153456	0.0010753
CIDECP1	51.231	1.2823	0.3405	0.000166136	0.00115532
FSIP1	59.427	1.119	0.2972	0.000166924	0.00116031
ARHGAP25	8.421	3.8836	1.0324	0.000168756	0.00117058
BCL2L2-PABPN1	17.248	2.6148	0.6985	0.000181582	0.00124541
LOC107986160	37.479	1.4513	0.3879	0.0001832	0.00125546
SPAG4	31.701	1.3444	0.3599	0.000187369	0.00127504
MRPS30-DT	20.277	1.6847	0.4516	0.000191048	0.00129793
TM4SF19-DYNLT2B	16.28	1.7599	0.475	0.000211528	0.00141895
FTH1P12	57.163	1.1675	0.3154	0.000214283	0.0014322
CXCL2	8.503	2.6525	0.7179	0.000220163	0.0014632
MMP10	6.229	5.4472	1.4767	0.000225365	0.00149297
ACSL5	62.673	1.0912	0.2964	0.000231718	0.00152813
TNFAIP6	12.204	2.7524	0.7492	0.000238844	0.00156654
CPT1C	72.467	1.018	0.2774	0.000243091	0.00159186
LOC105375914	8.993	2.8858	0.7871	0.000246054	0.00160935
CDKL3	67.021	1.0197	0.2796	0.000264944	0.00172198
LINC00944	20.886	1.611	0.4421	0.000268595	0.00174433
TMCC1-DT	58.7	1.0942	0.3033	0.000308267	0.0019679
C2orf16	33.38	1.3468	0.3736	0.000312423	0.00199135
DPH6-DT	10.328	2.2933	0.6372	0.000319186	0.00202351
HSPA1B	229.341	1.7702	0.4922	0.000322787	0.00204164
GBA	32.788	1.3895	0.3869	0.000328938	0.00207181
CENPV	35.841	1.2913	0.3596	0.00032928	0.00207238
LOC112268150	12.324	2.1544	0.5999	0.000329187	0.00207238
LINC02104	48.834	1.1969	0.3338	0.000335832	0.0021112
MIR99AHG	26.334	1.5298	0.4273	0.0003436	0.00215429
ANO7L1	10.09	3.0576	0.8564	0.000356625	0.00222957
LOC107985246	38.872	1.0869	0.3048	0.000362466	0.00226055
PSAT1P3	48.251	1.1232	0.3174	0.0004025	0.00246276
LOC105369344	15.713	2.0048	0.5712	0.000448203	0.00270232
DTX2	9.205	3.2933	0.9393	0.000454821	0.00273522
HTRA3	18.598	1.8213	0.5231	0.000498036	0.00296256
SH2D2A	38.13	1.0667	0.3067	0.000505539	0.00300411
LOC107985423	12.246	2.4315	0.7009	0.000522019	0.00308716
ENKUR	11.992	2.3346	0.6799	0.000595547	0.00346779
SNORA52	250.218	1.0167	0.2975	0.000630814	0.00364996
FUOM	26.58	1.3051	0.3823	0.000641028	0.00370387
PRR9	11.319	2.1579	0.637	0.00070557	0.00402744
PPP4R1L	57.338	1.0101	0.2994	0.000742279	0.00421946
LINC00663	11.103	2.2908	0.6807	0.000765079	0.00432523
RRN3P3	43.091	1.0756	0.3197	0.000766044	0.0043292
B3GAT3	65.236	1.0212	0.3054	0.000827122	0.0046076
HEY1	11.437	2.3949	0.7186	0.000859434	0.00475759
LOC112268219	16.246	1.7576	0.5285	0.000881774	0.00485196
LOC105378179	63.189	1.0576	0.3191	0.000919303	0.00502995
C6orf99	33.478	1.1278	0.3403	0.000920871	0.00503686
PHLDB3	55.57	1.0097	0.305	0.000930439	0.00508077
ANXA10	14.528	1.954	0.5935	0.000993931	0.00537237
MCOLN2	39.116	1.0779	0.3287	0.00103913	0.00557832
LOC105374101	15.458	1.6917	0.5215	0.00117802	0.00619495
RAB11FIP1P1	55.255	1.1034	0.342	0.00125467	0.00655623
BAMBI	19.032	1.7917	0.5585	0.00133587	0.00691487
LOC440489	30.623	1.0217	0.3191	0.00136497	0.00704781
TM7SF2	50.911	1.018	0.3186	0.00139722	0.00719403
LOC100506178	11.959	1.7902	0.5607	0.00140767	0.00724106
TNFSF8	31.665	1.5473	0.4854	0.00143303	0.00735546
RADIL	7.356	3.0964	0.9757	0.00150655	0.00768266
REX1BD	60.249	1.0489	0.3312	0.00154193	0.00783885
ARIH2OS	12.643	1.8455	0.583	0.00154747	0.0078646
C17orf107	11.814	2.2523	0.7138	0.00160351	0.00811441
FBXL22	16.493	1.7203	0.5468	0.00165311	0.00832459
C10orf90	28.27	1.1337	0.3608	0.00167596	0.00841652
LOC105371401	14.204	1.766	0.5662	0.00181447	0.00903239
CHRNE	36.714	1.1948	0.3846	0.00189086	0.00935903
GEMIN8P4	14.921	1.555	0.5019	0.0019481	0.00958769
GALM	23.153	1.2303	0.3975	0.00197045	0.00968035
LOC105372188	7.675	2.141	0.6919	0.00197294	0.00968973
SNORA8	110.275	1.0704	0.3466	0.00201168	0.00984527
ZC3H12A	31.635	1.3866	0.449	0.0020148	0.00985716

## Sheet: DEG_dn1
MM13 Downregulated DEGs Vol. + Aur. vs DMSO| log2FC < -1
Total genes: 467 | Sorted by adjusted P-value
Gene	Base Mean	log2 Fold Change	lfcSE	P-value	Adjusted P-value
ASPM	3555.06	-2.2082	0.1099	7.27237e-90	1.20009e-86
KIF11	1922.99	-1.8866	0.1018	1.27599e-76	1.50402e-73
SMC4	3853.07	-1.3449	0.0736	1.29367e-74	1.33426e-71
RRM2	1145.11	-1.5669	0.0892	3.85218e-69	3.02708e-66
FBXO5	607.923	-2.2168	0.1266	1.23086e-68	8.83112e-66
ELOVL2	851.69	-1.7938	0.1041	1.72389e-66	1.18532e-63
KIF20A	1388.77	-2.2573	0.1343	2.0616e-63	1.26002e-60
LMNB1	592.254	-2.1446	0.1285	1.49885e-62	8.83356e-60
LRATD2	692.281	-1.513	0.0933	4.43872e-59	2.28899e-56
NPTX1	604.002	-2.5395	0.1584	8.02204e-58	4.01151e-55
HJURP	1451.84	-1.6904	0.1059	2.27171e-57	1.10258e-54
TOP2A	6811.47	-1.8595	0.1172	9.85768e-57	4.64776e-54
NUSAP1	2146.75	-1.5617	0.0984	1.13295e-56	5.19333e-54
NCAPG	1257.03	-1.768	0.1122	5.53013e-56	2.46644e-53
GTSE1	354.038	-2.0312	0.129	8.03392e-56	3.48884e-53
KIF23	1212.63	-1.4484	0.0928	5.91759e-55	2.4413e-52
KNL1	2401.23	-1.724	0.1104	5.91397e-55	2.4413e-52
MCM4	2412.39	-1.244	0.0799	1.17238e-54	4.71867e-52
DTL	1212.72	-1.5155	0.099	6.40727e-53	2.51745e-50
ANLN	6179.12	-1.2964	0.0853	3.38178e-52	1.26832e-49
ZNF367	885.777	-1.9164	0.1275	4.62214e-51	1.65814e-48
CIP2A	1468.69	-1.3408	0.0918	2.46173e-48	8.46323e-46
MELK	939.998	-1.2996	0.0897	1.59e-47	5.35473e-45
CCNA2	1010.18	-1.9863	0.1374	2.15992e-47	7.12861e-45
CENPF	8455.57	-1.6106	0.1116	3.31795e-47	1.07358e-44
BRCA2	1290.83	-1.4588	0.1015	7.53829e-47	2.39225e-44
SFRP1	7847.19	-1.3095	0.0913	1.09993e-46	3.42474e-44
BLM	912.381	-1.5808	0.111	4.66879e-46	1.35166e-43
WDR76	643.624	-1.8021	0.127	1.07937e-45	3.01894e-43
SPC24	1451.44	-1.6747	0.1187	3.31141e-45	9.10748e-43
BUB1	1813.75	-1.4705	0.1043	3.79166e-45	1.02574e-42
FAM83D	482.384	-1.7887	0.1273	7.90853e-45	2.07153e-42
CDCA2	1257.8	-1.6514	0.1176	9.07485e-45	2.33989e-42
HELLS	912.416	-1.5757	0.1127	2.19348e-44	5.56875e-42
PRC1	3634.46	-1.5249	0.1101	1.3648e-43	3.36149e-41
HAS2	1287.2	-1.5237	0.111	7.42701e-43	1.80236e-40
CKAP2L	1004.58	-1.9786	0.1488	2.41812e-40	5.18232e-38
RBL1	745.625	-1.1248	0.0851	7.33237e-40	1.55127e-37
NUCKS1	10791.2	-1.0781	0.0817	9.66251e-40	2.01836e-37
POLA1	584.35	-1.4984	0.1136	1.02792e-39	2.12034e-37
CKAP2	2196.7	-1.3099	0.1002	4.54209e-39	9.25354e-37
SGO2	714.156	-1.3749	0.1055	8.03514e-39	1.59754e-36
FAM111B	419.894	-2.4967	0.192	1.16517e-38	2.28901e-36
CEP55	2783.88	-1.5415	0.1194	3.96408e-38	7.53679e-36
H1-4	1693.37	-2.0172	0.1565	5.31623e-38	9.96914e-36
RTKN2	194.424	-1.9621	0.1527	8.95622e-38	1.64217e-35
RACGAP1	2444.92	-1.2352	0.0967	2.23797e-37	3.97107e-35
PM20D2	750.765	-1.3185	0.1039	6.62083e-37	1.16231e-34
MCM7	2216.66	-1.363	0.1075	7.99678e-37	1.38908e-34
KIF2C	1312.88	-1.4953	0.118	8.85963e-37	1.52293e-34
GPSM2	1026.32	-1.519	0.1202	1.27642e-36	2.17149e-34
CCNB2	984.593	-1.4028	0.1114	2.40085e-36	4.04273e-34
CENPI	671.052	-1.3733	0.1093	3.38499e-36	5.64233e-34
KIF20B	1768.85	-1.4361	0.1149	8.10627e-36	1.3377e-33
TMPO	3446.18	-1.4648	0.1174	1.01423e-35	1.65712e-33
CENPA	310.258	-1.7969	0.1445	1.59567e-35	2.58155e-33
SYNE2	1321.57	-2.0497	0.1651	2.27025e-35	3.63725e-33
SGO1	339.183	-1.5213	0.1227	2.78066e-35	4.41215e-33
DLGAP5	1751.34	-1.9172	0.1554	5.80106e-35	9.11706e-33
ALDH1A3	3620.04	-1.0761	0.0873	6.72426e-35	1.04683e-32
MCM3	3053.64	-1.0117	0.0822	8.28302e-35	1.27744e-32
H2BC21	725.877	-2.0138	0.1638	1.01184e-34	1.54605e-32
CENPE	1435.65	-1.6804	0.1371	1.54691e-34	2.32064e-32
MYBL1	936.936	-1.1424	0.0935	2.50504e-34	3.72416e-32
EXO1	686.847	-1.4369	0.1196	2.89531e-33	4.19109e-31
KIF15	483.42	-1.5596	0.1299	3.3926e-33	4.86823e-31
BUB1B	1060.18	-1.4983	0.125	4.11784e-33	5.85799e-31
GEN1	895.912	-1.1479	0.0958	4.32071e-33	6.09405e-31
HMGB3	585.845	-1.5288	0.129	2.1402e-32	2.96787e-30
NCAPH	522.728	-1.5313	0.1294	2.67927e-32	3.654e-30
SHCBP1	907.877	-1.3346	0.114	1.18401e-31	1.56308e-29
SHISA2	525.923	-1.6768	0.1436	1.60121e-31	2.09707e-29
H2BC17	1943.1	-2.0491	0.1771	5.63835e-31	7.21271e-29
MBOAT1	593.617	-1.306	0.1131	7.53462e-31	9.56433e-29
ASF1B	339.478	-1.4268	0.1237	9.36572e-31	1.17979e-28
NUF2	733.572	-1.8819	0.1637	1.40874e-30	1.76114e-28
RMI2	212.28	-1.6811	0.1463	1.44994e-30	1.79901e-28
C18orf54	424.462	-1.6879	0.1472	1.94231e-30	2.39195e-28
UBE2C	571.249	-1.363	0.1194	3.60174e-30	4.37028e-28
SPAG5	1178.77	-1.1171	0.0979	3.70547e-30	4.46333e-28
ATAD2	1568.23	-1.1857	0.1039	3.8061e-30	4.55132e-28
NEK2	464.492	-1.7246	0.1514	4.80739e-30	5.66654e-28
KIF4A	638.973	-1.4145	0.1246	6.96588e-30	8.15255e-28
DEPDC1B	305.112	-1.9195	0.1691	7.23084e-30	8.40305e-28
ORC1	318.175	-1.3712	0.1208	7.39632e-30	8.53525e-28
MARCKS	3423.69	-1.3466	0.1188	8.87908e-30	1.01752e-27
RFC3	640.324	-1.1854	0.105	1.46148e-29	1.66327e-27
KIF14	1249.66	-1.4653	0.1298	1.51119e-29	1.70806e-27
ARL6IP1	4985.66	-1.0941	0.0972	2.15146e-29	2.4152e-27
MIS18BP1	1207.72	-1.3218	0.1181	4.67674e-29	5.11097e-27
PLK4	385.755	-1.5922	0.1428	6.87029e-29	7.45879e-27
GAS2L3	1541.05	-1.0065	0.0904	8.15017e-29	8.79046e-27
CCNB1	3202.76	-1.2154	0.1095	1.32419e-28	1.41894e-26
PLA2G7	243.733	-1.6795	0.1518	1.82593e-28	1.94396e-26
NCAPG2	822.282	-1.1155	0.1009	1.99552e-28	2.1109e-26
GALNT5	1081.56	-1.0756	0.0974	2.31219e-28	2.4303e-26
AURKB	517.256	-1.4492	0.1315	3.10314e-28	3.24101e-26
GINS1	516.883	-1.5891	0.1442	3.13026e-28	3.24877e-26
ECT2	3184.45	-1.2008	0.1091	3.66347e-28	3.77841e-26
RAD21	3537.37	-1.0459	0.0969	3.92439e-27	3.87787e-25
SKA3	445.564	-1.6961	0.1573	4.15353e-27	4.07986e-25
CCNF	445.792	-1.6541	0.1542	7.4522e-27	7.2339e-25
WEE1	640.762	-1.2743	0.1191	1.06071e-26	1.01766e-24
IQGAP3	667.23	-1.9091	0.1788	1.29504e-26	1.22118e-24
MCM10	423.671	-1.4508	0.1366	2.33779e-26	2.16732e-24
BIRC5	1412.36	-1.3057	0.1237	4.69965e-26	4.30854e-24
TPX2	2268.65	-1.4942	0.1417	5.17e-26	4.71355e-24
MMS22L	869.835	-1.1913	0.1134	7.80419e-26	7.07609e-24
CLSPN	543.339	-1.3175	0.1254	8.12463e-26	7.32637e-24
CDCA7	307.85	-1.5564	0.1482	8.35506e-26	7.49322e-24
NEURL1B	79.649	-3.2572	0.3104	9.25063e-26	8.25157e-24
PEX5L	387.442	-1.4243	0.1358	1.00175e-25	8.88758e-24
TMEM97	1406.88	-1.0003	0.0956	1.30956e-25	1.15564e-23
ARPIN	1041.91	-1.1693	0.1125	2.59021e-25	2.26157e-23
BRIP1	903.839	-1.2841	0.124	4.04874e-25	3.46178e-23
PLCXD3	366.62	-1.7032	0.1646	4.32291e-25	3.67714e-23
ERCC6L	381.866	-1.4641	0.1415	4.47338e-25	3.78563e-23
H2AC16	878.766	-1.7971	0.174	5.32492e-25	4.48325e-23
ARNT2	164.126	-1.7932	0.1743	7.98642e-25	6.68994e-23
NDC80	825.522	-1.7704	0.1721	8.06319e-25	6.72014e-23
PLK1	203.398	-2.1909	0.2133	9.41191e-25	7.76577e-23
CDCA3	283.958	-1.8089	0.1768	1.42385e-24	1.16319e-22
FANCI	1654.56	-1.1671	0.1148	2.68839e-24	2.1747e-22
DEPDC1	1394.82	-1.2876	0.1269	3.54594e-24	2.81322e-22
KIT	56.342	-3.4791	0.3459	8.47358e-24	6.62706e-22
MCM6	716.826	-1.1144	0.1109	9.18948e-24	7.15306e-22
H2BC7	729.772	-1.3588	0.1352	9.34486e-24	7.23985e-22
WDHD1	920.679	-1.18	0.1175	9.50685e-24	7.33093e-22
PBK	1458.81	-1.5409	0.1536	1.07356e-23	8.20182e-22
ARHGAP29	5123.39	-1.0782	0.1089	4.23712e-23	3.09385e-21
CCN3	1410.9	-1.0596	0.1074	5.7105e-23	4.15131e-21
KIF18A	1362.53	-1.2485	0.1269	7.60903e-23	5.5072e-21
CDC20	346.389	-1.5177	0.1553	1.49311e-22	1.07128e-20
H2BC14	151.981	-2.6276	0.2694	1.80535e-22	1.28969e-20
H1-0	467.996	-1.1718	0.1213	4.33588e-22	3.03181e-20
TTK	1605.62	-1.6294	0.169	5.36711e-22	3.70577e-20
SERTAD4	213.882	-1.7151	0.1782	6.17523e-22	4.22837e-20
H1-2	7766.18	-1.5024	0.1571	1.12696e-21	7.62179e-20
ST8SIA6	190.651	-1.6767	0.1759	1.51098e-21	1.00541e-19
DMBT1	218.984	-1.594	0.1674	1.65695e-21	1.09372e-19
PAK3	990.823	-1.0301	0.1085	2.26901e-21	1.49176e-19
DAAM2	1124.79	-1.2767	0.1352	3.61362e-21	2.33851e-19
DOCK2	530.045	-1.2138	0.1287	4.15866e-21	2.67028e-19
HMGB2	1110.42	-1.6504	0.1751	4.22807e-21	2.70433e-19
DONSON	513.608	-1.1479	0.1224	6.81229e-21	4.27439e-19
KNTC1	1749.22	-1.225	0.1308	7.80396e-21	4.87807e-19
H4C5	5524.9	-1.446	0.1554	1.32782e-20	8.11541e-19
DNA2	430.009	-1.3049	0.1406	1.66506e-20	1.00647e-18
EMB	646.921	-1.0977	0.1185	2.05985e-20	1.24057e-18
ATAD5	431.287	-1.4911	0.1616	2.79836e-20	1.67313e-18
GNB4	1665.84	-1.0296	0.1116	2.83361e-20	1.6881e-18
KCTD12	933.543	-1.3011	0.1413	3.42317e-20	2.01747e-18
ITGA4	1182.37	-1.0509	0.1147	5.06413e-20	2.96341e-18
USP1	2715.25	-1.2299	0.1343	5.2297e-20	3.04949e-18
OXCT1	963.785	-1.1841	0.1301	9.06494e-20	5.19408e-18
H2AC11	1687.16	-1.9202	0.2116	1.13796e-19	6.47536e-18
STIL	700.103	-1.0508	0.116	1.28659e-19	7.29597e-18
CDC45	306.2	-1.2982	0.1437	1.65818e-19	9.33903e-18
BICC1	428.229	-1.2486	0.1394	3.3307e-19	1.85686e-17
CDKN3	862.485	-1.4666	0.1641	3.98028e-19	2.18215e-17
KIF18B	144.326	-2.1419	0.2409	5.99662e-19	3.23387e-17
ANGPTL2	1102.21	-1.0934	0.1233	7.58308e-19	4.04971e-17
ARL4C	1474.59	-1.0041	0.1143	1.58001e-18	8.25107e-17
FZD8	681.418	-1.0224	0.1165	1.68074e-18	8.74938e-17
RNF144A	577.4	-1.2857	0.1469	2.13124e-18	1.10597e-16
H2BC15	1120.97	-1.205	0.1378	2.1753e-18	1.12529e-16
H2AC17	1597.83	-1.6307	0.1872	2.97127e-18	1.52747e-16
SLFN11	376.132	-1.2142	0.1394	3.08777e-18	1.58243e-16
CNTRL	775.852	-1.204	0.1385	3.46616e-18	1.75996e-16
CDK1	3770.92	-1.7215	0.1983	3.89291e-18	1.95856e-16
ABHD17C	430.661	-1.1659	0.1352	6.32706e-18	3.12602e-16
ADGRF5	88.078	-2.1355	0.248	7.19913e-18	3.54627e-16
PCLAF	597.715	-1.3484	0.1567	7.7348e-18	3.7988e-16
BARD1	920.796	-1.0485	0.1221	8.68097e-18	4.23826e-16
CDC7	431.811	-1.3348	0.1557	1.02497e-17	4.97472e-16
ESCO2	674.112	-1.3408	0.1567	1.16341e-17	5.58101e-16
MYLK	1425.2	-1.0144	0.1187	1.30935e-17	6.26288e-16
INCENP	305.178	-1.4441	0.1707	2.68294e-17	1.26497e-15
CDC25C	296.303	-1.4091	0.1668	2.96728e-17	1.39404e-15
ADAM19	1597.2	-1.1421	0.1352	2.9736e-17	1.39404e-15
DCLRE1B	381.657	-1.1301	0.1351	6.09957e-17	2.80377e-15
POLQ	473.277	-1.22	0.146	6.4839e-17	2.97215e-15
H4C2	3149.21	-1.5902	0.1905	7.02838e-17	3.20393e-15
CDCA5	516.305	-1.0027	0.1206	9.24806e-17	4.13581e-15
RFC4	734.383	-1.1723	0.1414	1.11435e-16	4.97e-15
H2AC12	1933.32	-1.8829	0.2282	1.57956e-16	6.98816e-15
FAM20C	900.164	-1.2295	0.1494	1.86768e-16	8.24076e-15
UHRF1	198.791	-1.5167	0.1843	1.90442e-16	8.38044e-15
CDKN2C	164.718	-1.6961	0.2062	1.94252e-16	8.50277e-15
DEK	12629.4	-1.1954	0.1464	3.24805e-16	1.385e-14
H2BC11	4229.1	-1.8588	0.23	6.3692e-16	2.67442e-14
RUNX2	352.624	-1.3834	0.1724	1.00765e-15	4.15705e-14
PEG10	902.393	-1.4905	0.1867	1.42959e-15	5.82496e-14
PSIP1	867.171	-1.0466	0.1314	1.68277e-15	6.82287e-14
CCNE2	236.44	-1.7461	0.2198	1.9682e-15	7.9025e-14
EZH2	274.303	-1.2247	0.1544	2.12975e-15	8.53036e-14
KCNK3	67.049	-2.1549	0.2721	2.37035e-15	9.47105e-14
H2AC4	948.459	-1.9434	0.2469	3.52603e-15	1.3821e-13
NREP	330.454	-1.0661	0.1356	3.82192e-15	1.49453e-13
H1-1	289.865	-1.2351	0.1582	5.87717e-15	2.26072e-13
PMEPA1	410.645	-1.0214	0.1315	7.85039e-15	2.97809e-13
DSN1	786.302	-1.0465	0.1351	9.35707e-15	3.52535e-13
G2E3	466.384	-1.0086	0.1308	1.22846e-14	4.55553e-13
THBD	148.845	-1.5071	0.1956	1.32012e-14	4.85181e-13
E2F8	51.527	-3.058	0.402	2.81775e-14	1.00865e-12
ANKRD9	425.981	-1.0542	0.1387	2.92896e-14	1.04618e-12
CLSTN2	166.775	-1.773	0.2337	3.32207e-14	1.18148e-12
MTBP	261.573	-1.0958	0.1447	3.58343e-14	1.26896e-12
CRYBG1	166.891	-1.5961	0.2114	4.3458e-14	1.52584e-12
MYBL2	95.004	-2.1672	0.2878	5.05484e-14	1.75981e-12
MCUB	322.329	-1.0627	0.1414	5.73443e-14	1.98385e-12
NCAPD2	1652.74	-1.3107	0.1749	6.66851e-14	2.28781e-12
H2BC3	925.594	-1.8738	0.25	6.68461e-14	2.28858e-12
PSRC1	379.638	-1.0262	0.1372	7.41292e-14	2.52223e-12
PAQR4	213.813	-1.3077	0.1755	9.29248e-14	3.12948e-12
FZD1	263.859	-1.1042	0.1487	1.13511e-13	3.79951e-12
PKIB	2040.45	-1.2983	0.1757	1.46667e-13	4.8503e-12
HMGB1	4199.47	-1.1694	0.1583	1.50436e-13	4.96498e-12
VCAN	3756.03	-1.3365	0.1817	1.88934e-13	6.21073e-12
ALG10	319.79	-1.1832	0.1609	1.93778e-13	6.35729e-12
H2BC13	722.778	-1.7952	0.2444	2.07488e-13	6.79357e-12
NEK3	199.467	-1.0531	0.1434	2.10047e-13	6.85017e-12
CDCA8	226.086	-1.6542	0.2254	2.13212e-13	6.93971e-12
PRICKLE1	246.58	-1.0251	0.1401	2.56079e-13	8.25356e-12
PRIM1	587.961	-1.291	0.1766	2.6461e-13	8.47881e-12
LRRC8C	176.062	-1.225	0.1677	2.77005e-13	8.84167e-12
FGF5	1676.49	-1.071	0.147	3.20315e-13	1.02043e-11
ZGRF1	359.953	-1.1213	0.1539	3.22629e-13	1.02582e-11
C9orf40	517.76	-1.0675	0.1474	4.40629e-13	1.38237e-11
TRIM55	314.469	-1.301	0.1803	5.40749e-13	1.67106e-11
RAD51AP1	720.757	-1.2862	0.1786	5.90579e-13	1.81823e-11
NGEF	354.941	-1.1621	0.1618	6.92292e-13	2.10004e-11
DDHD2	499.639	-1.0481	0.1467	9.09241e-13	2.70348e-11
H1-5	4233.13	-2.1838	0.3058	9.32894e-13	2.76882e-11
KRT80	332.031	-1.0182	0.1428	9.90891e-13	2.93041e-11
H2AC14	737.759	-1.7353	0.2458	1.66158e-12	4.81887e-11
H2AC13	1424.53	-1.733	0.2459	1.8352e-12	5.26687e-11
BRI3BP	536.431	-1.1569	0.1642	1.87115e-12	5.36072e-11
FAM81A	116.152	-1.2569	0.1793	2.38171e-12	6.77638e-11
CHAF1B	302.06	-1.0176	0.1457	2.83154e-12	8.04236e-11
TICRR	325.961	-1.5316	0.2205	3.72431e-12	1.0364e-10
H2BC4	5053.92	-1.0868	0.1574	5.06611e-12	1.38642e-10
NFIB	626.935	-1.2139	0.1765	6.11064e-12	1.65579e-10
ST6GALNAC2	106.205	-1.3227	0.1934	7.94038e-12	2.11002e-10
PI4K2B	1594.74	-1.0431	0.1531	9.53752e-12	2.49426e-10
GAS1	76.204	-1.8604	0.2743	1.17982e-11	3.0421e-10
MND1	105.89	-1.9054	0.2814	1.27331e-11	3.27803e-10
RMI1	492.4	-1.1305	0.1672	1.38126e-11	3.5504e-10
SSBP2	176.015	-1.1328	0.168	1.53397e-11	3.91851e-10
OAS3	278.82	-1.7567	0.261	1.69409e-11	4.29429e-10
KIF24	280.907	-1.0733	0.1597	1.80591e-11	4.54284e-10
SASS6	333.687	-1.1562	0.1721	1.82553e-11	4.58521e-10
IGFBP5	303.61	-1.4076	0.2098	1.9646e-11	4.91955e-10
ACTG2	80.202	-1.4921	0.223	2.2302e-11	5.55094e-10
LRRCC1	516.366	-1.3378	0.2002	2.33881e-11	5.80376e-10
DDX60	176.805	-1.2356	0.1858	2.93294e-11	7.19159e-10
HNRNPA1	766.849	-1.1043	0.1677	4.54727e-11	1.08438e-09
PIMREG	285.564	-1.087	0.1658	5.47067e-11	1.29152e-09
LOC107987285	45.305	-1.9529	0.2978	5.48699e-11	1.29352e-09
H2BC6	165.302	-1.5637	0.239	5.99688e-11	1.40769e-09
H3C2	4822.3	-1.2848	0.1966	6.36039e-11	1.48878e-09
TMEM71	329.055	-1.062	0.1626	6.46158e-11	1.51033e-09
H2AC20	790.292	-1.0523	0.1611	6.48421e-11	1.51347e-09
FAM13C	52.408	-1.889	0.2892	6.51261e-11	1.51795e-09
HYLS1	211.926	-1.1864	0.1822	7.44377e-11	1.7301e-09
HMMR	1174.37	-1.1103	0.1715	9.61198e-11	2.20301e-09
H2AC7	729.633	-1.6209	0.2513	1.11143e-10	2.53326e-09
LOC728688	116.67	-1.4217	0.221	1.24965e-10	2.82104e-09
GUCY1A2	37.005	-2.4163	0.377	1.45697e-10	3.25395e-09
CRISPLD1	162.223	-1.0324	0.1611	1.4572e-10	3.25395e-09
RAD51	240.933	-1.0393	0.1625	1.60204e-10	3.56774e-09
PPL	88.52	-1.8411	0.2885	1.76577e-10	3.9165e-09
FANCG	549.814	-1.0139	0.1591	1.8799e-10	4.14735e-09
CD24	164.49	-1.2965	0.2042	2.18379e-10	4.75577e-09
C2orf88	156.804	-1.1416	0.18	2.24217e-10	4.86206e-09
TNFRSF19	176.778	-1.0715	0.169	2.30722e-10	4.99656e-09
TYMS	127.087	-1.6223	0.256	2.34334e-10	5.06814e-09
H2AZ1	3681.26	-1.0141	0.1613	3.20114e-10	6.83378e-09
KCNK2	104.498	-1.3723	0.2193	3.88963e-10	8.25022e-09
ZNF185	885.239	-1.0784	0.1726	4.21189e-10	8.86539e-09
BORA	430.255	-1.1703	0.1881	4.96442e-10	1.02789e-08
HASPIN	209.436	-1.064	0.1719	5.97021e-10	1.22082e-08
ZNF704	85.586	-1.491	0.241	6.18293e-10	1.26119e-08
NSMCE4A	567.424	-1.1887	0.1926	6.69607e-10	1.35581e-08
H3C3	1567.29	-2.1614	0.3503	6.82906e-10	1.38104e-08
SENP7	356.656	-1.0128	0.1642	6.99326e-10	1.41252e-08
HAS3	133.339	-1.8762	0.3052	7.89031e-10	1.58594e-08
HMGN2P3	159.756	-1.0522	0.1721	9.76265e-10	1.94334e-08
TACC3	326.863	-1.1585	0.1898	1.0314e-09	2.04323e-08
C3orf70	134.707	-1.4844	0.2435	1.07997e-09	2.13432e-08
CTDSP1	394.317	-1.0815	0.1776	1.12787e-09	2.21837e-08
PDS5B	912.787	-1.0802	0.1782	1.337e-09	2.59566e-08
CIBAR1P1	109.661	-1.2063	0.1996	1.50274e-09	2.88016e-08
F2RL1	29.849	-2.2969	0.3849	2.40064e-09	4.49081e-08
SAPCD2	84.754	-1.5566	0.2609	2.41911e-09	4.51074e-08
MAD2L1	716.756	-1.0615	0.178	2.45767e-09	4.57748e-08
APLN	238.234	-1.0043	0.1692	2.90219e-09	5.35704e-08
TK1	296.742	-1.0748	0.1822	3.64981e-09	6.63317e-08
C6orf141	103.079	-1.1441	0.194	3.69596e-09	6.70228e-08
UGT8	73.579	-1.6381	0.2785	4.03493e-09	7.2532e-08
ZNF724	308.865	-1.0534	0.1794	4.27654e-09	7.64587e-08
FOXM1	485.951	-1.4107	0.2422	5.75546e-09	1.01147e-07
ZNF483	128.42	-1.1572	0.1988	5.8259e-09	1.02276e-07
FANCA	188.9	-1.038	0.1786	6.20452e-09	1.08346e-07
CMC4	270.164	-1.049	0.1806	6.27845e-09	1.09405e-07
CDH3	73.079	-1.4845	0.2556	6.31838e-09	1.09985e-07
TMPO-AS1	30.153	-2.2053	0.3804	6.73591e-09	1.16638e-07
HMCN1	354.77	-1.0156	0.1756	7.27324e-09	1.25679e-07
H4C8	2849.58	-1.039	0.1798	7.52796e-09	1.29402e-07
MTUS1	193.263	-1.0552	0.1833	8.62345e-09	1.46554e-07
ILDR2	129.429	-1.0438	0.1825	1.07463e-08	1.81325e-07
OIP5	155.302	-1.066	0.1866	1.10973e-08	1.86295e-07
CLCA2	96.035	-1.3338	0.2335	1.11548e-08	1.8707e-07
SYNE3	472.686	-1.0933	0.1914	1.12328e-08	1.87995e-07
CENPH	277.489	-1.0125	0.1777	1.2223e-08	2.0333e-07
KIAA1549L	422.377	-1.516	0.2672	1.39146e-08	2.29619e-07
TMEM132B	24.21	-2.9186	0.5184	1.79842e-08	2.93256e-07
SCARA3	64.302	-1.4331	0.2547	1.82869e-08	2.97604e-07
MYH10	677.296	-1.2123	0.2154	1.83444e-08	2.98245e-07
C5	154.457	-1.0567	0.1878	1.84188e-08	2.99161e-07
LOC107984127	54.658	-1.725	0.3082	2.18784e-08	3.50862e-07
H3C1	543.908	-1.3916	0.2489	2.24456e-08	3.59608e-07
ARL6IP6	241.246	-1.1096	0.2004	3.08109e-08	4.86082e-07
TRHDE-AS1	85.025	-1.1803	0.2138	3.4028e-08	5.33774e-07
IGIP	113.205	-1.1191	0.2031	3.58957e-08	5.60408e-07
POLE	295.346	-1.3598	0.2479	4.15401e-08	6.40052e-07
H2AC6	2675.48	-1.1428	0.2097	5.06779e-08	7.73623e-07
CDC20P1	72.793	-1.3558	0.251	6.56096e-08	9.86954e-07
KIF4B	84.191	-1.4651	0.2719	7.11319e-08	1.06324e-06
SH3GL2	77.794	-1.6359	0.307	9.88398e-08	1.44214e-06
MYH16	39.389	-1.8067	0.3391	9.94269e-08	1.44942e-06
MBNL3	212.375	-1.0529	0.1988	1.18553e-07	1.69676e-06
HLA-DQB1	142.716	-1.0991	0.2083	1.31554e-07	1.86664e-06
PER3	89.776	-1.3895	0.2641	1.4274e-07	2.00638e-06
ST6GALNAC5	46.261	-1.5441	0.2953	1.70241e-07	2.35681e-06
LUM	195.353	-1.3078	0.2504	1.7601e-07	2.42755e-06
CENPK	567.635	-1.1467	0.2195	1.76087e-07	2.42755e-06
MTSS1	108.078	-1.1635	0.224	2.05874e-07	2.81236e-06
CSMD3	174.724	-1.1256	0.2168	2.08655e-07	2.84799e-06
H3C4	1641.24	-1.7182	0.3318	2.24527e-07	3.04198e-06
AHNAK2	8647.38	-1.1195	0.2166	2.34821e-07	3.16587e-06
H4C3	10158.5	-1.0724	0.2096	3.11641e-07	4.10432e-06
H2BC18	24.289	-2.4655	0.4867	4.06147e-07	5.22795e-06
CIT	1007.48	-1.0456	0.209	5.67743e-07	7.0549e-06
H1-10	54.045	-1.6773	0.3369	6.42137e-07	7.93749e-06
NFIA	524.476	-1.1217	0.2261	6.97677e-07	8.54085e-06
SUSD5	69.49	-1.218	0.2462	7.51412e-07	9.17824e-06
KLF5	96.991	-1.0746	0.2181	8.39243e-07	1.01534e-05
ZNF519	107.595	-1.0991	0.2231	8.39973e-07	1.01548e-05
MNS1	72.373	-1.4514	0.2947	8.46113e-07	1.0214e-05
MYB	20.078	-2.3079	0.4725	1.03528e-06	1.22819e-05
ZNF738	130.893	-1.0183	0.2091	1.11846e-06	1.31647e-05
CDC25B	464.954	-1.1294	0.2326	1.20595e-06	1.40641e-05
POU3F2	83.108	-1.1141	0.2323	1.61792e-06	1.85281e-05
DLEU2	269.859	-1.3449	0.2806	1.63715e-06	1.87353e-05
CDH11	24.818	-2.148	0.4547	2.31036e-06	2.56048e-05
SPIN4	75.423	-1.3112	0.278	2.40567e-06	2.6501e-05
HS3ST1	29.955	-1.8648	0.3965	2.55648e-06	2.80313e-05
TGFA	27.191	-1.9576	0.4198	3.11542e-06	3.35112e-05
RPS6KA5	144.44	-1.0427	0.2237	3.14552e-06	3.37718e-05
EDNRA	70.084	-1.269	0.2729	3.32786e-06	3.55675e-05
H3C11	27.732	-2.2513	0.4886	4.06901e-06	4.27142e-05
RCAN2	46.252	-1.2533	0.274	4.77619e-06	4.95391e-05
SPC25	11.461	-3.289	0.7254	5.78866e-06	5.90292e-05
STARD4-AS1	23.601	-1.8908	0.4208	7.02928e-06	6.99621e-05
SCN5A	146.081	-1.2809	0.2859	7.47644e-06	7.40553e-05
GLI3	191.669	-1.5866	0.3543	7.51572e-06	7.42692e-05
MKI67	2947.39	-2.0293	0.4531	7.50874e-06	7.42692e-05
FAM72B	42.73	-1.4474	0.3233	7.57386e-06	7.47959e-05
B3GALT1	81.134	-1.0528	0.2357	7.96549e-06	7.82419e-05
ONECUT2	24.917	-2.2466	0.5042	8.36376e-06	8.18131e-05
TEDC2	68.767	-1.2053	0.2732	1.02932e-05	9.83541e-05
PDLIM3	63.46	-1.3095	0.2979	1.10453e-05	0.000104632
CDT1	98.065	-1.1863	0.2714	1.23955e-05	0.00011642
L1CAM	437.06	-1.0277	0.2354	1.26997e-05	0.000118891
RRM2P3	28.761	-1.5854	0.3643	1.35038e-05	0.000125332
H3C10	1029.83	-1.8337	0.4215	1.35879e-05	0.00012597
DSC2	57.577	-1.1071	0.2547	1.37763e-05	0.000127359
ARL6IP1P2	46.226	-1.2996	0.2997	1.45161e-05	0.000133526
ABCB5	39.907	-1.4873	0.3435	1.49502e-05	0.000137137
LOC112268037	42.007	-1.4775	0.3416	1.52755e-05	0.000139654
NMU	10.604	-3.5643	0.8252	1.56672e-05	0.000142957
DKK2	46.061	-1.3488	0.3127	1.60569e-05	0.00014607
VWDE	80.225	-1.145	0.2656	1.62706e-05	0.000147933
SLFN13	33.738	-1.736	0.4032	1.66694e-05	0.000150969
SYTL5	8.16	-3.8791	0.9113	2.07445e-05	0.000184542
H4C1	421.427	-1.1391	0.2685	2.21768e-05	0.000195596
TMSB15A	146.534	-1.2684	0.2993	2.25602e-05	0.000198766
BACE1	284.905	-1.0733	0.2533	2.26425e-05	0.000199385
H2AC15	211.273	-1.253	0.2968	2.41914e-05	0.00021122
LOC112268301	41.949	-1.3018	0.3085	2.45092e-05	0.000213882
SEMA3D	50.043	-1.2174	0.2889	2.51467e-05	0.000219098
PLPPR4	20.511	-1.8839	0.4511	2.96442e-05	0.000253072
DACT1	62.277	-1.0832	0.2597	3.03712e-05	0.00025861
MYO7B	16.086	-2.0163	0.4862	3.37054e-05	0.00028349
SPTB	62.317	-1.2144	0.2937	3.55656e-05	0.000297925
C1orf226	63.166	-1.3921	0.3416	4.59014e-05	0.000373135
IFNLR1	20.574	-2.2019	0.5412	4.7309e-05	0.000383444
LOC101060227	29.61	-1.6997	0.4198	5.1359e-05	0.000411221
RAD54L	64.474	-1.4042	0.3496	5.90504e-05	0.000465798
ADGRA2	69.276	-1.1336	0.2845	6.75411e-05	0.000524007
COL3A1	15.656	-2.5398	0.6386	6.97837e-05	0.000538872
HLF	15.817	-2.135	0.5371	7.03135e-05	0.000542456
TYMSOS	21.531	-1.6835	0.4282	8.43764e-05	0.000634341
MRTFB	315.477	-1.1308	0.2878	8.49764e-05	0.00063798
SIRPG-AS1	22.635	-1.712	0.4393	9.72715e-05	0.00071852
LOC112268106	38.018	-1.3743	0.3532	0.000100056	0.00073806
FBXO43	27.395	-1.5132	0.3895	0.000102331	0.000751517
NHSL2	30.469	-1.8629	0.4829	0.000114315	0.000830657
NR5A2	33.344	-1.2396	0.3234	0.000126314	0.000905097
ADGRF1	9.993	-2.5992	0.6837	0.000143728	0.00101315
TNS1	39.467	-1.4493	0.3827	0.000152402	0.00106882
PSMC3IP	53.32	-1.2203	0.3237	0.000163226	0.00113652
PADI3	22.361	-1.6788	0.4469	0.000172167	0.00119174
CELF2	32.396	-1.7545	0.4706	0.000192977	0.0013105
LOC100506730	10.944	-2.6262	0.707	0.000203378	0.00137103
LINC01224	11.003	-2.9258	0.7933	0.000226052	0.00149571
PIGAP1	20.982	-1.8885	0.5137	0.000236608	0.00155496
NANOS1	72.221	-1.0683	0.2946	0.000287292	0.00185047
ZNF385B	12.95	-2.3035	0.6383	0.00030747	0.00196357
MYH15	47.616	-1.1315	0.314	0.000313283	0.00199452
LINC00707	171.069	-1.0239	0.2881	0.000378818	0.00234607
ELFN2	77.671	-1.031	0.2904	0.000384123	0.00237497
YWHAZP6	21.003	-1.4705	0.4147	0.00039133	0.00240691
SCIRT	25.497	-1.5625	0.4412	0.000397633	0.00243569
PHOSPHO2	48.377	-1.1021	0.3138	0.00044524	0.00269035
FAM110A	22.078	-1.6294	0.4641	0.000446491	0.00269396
MAF	28.545	-1.3854	0.3968	0.00047955	0.00286908
ALOX5AP	8.48	-2.5407	0.731	0.000509224	0.00302274
TP63	42.098	-1.4431	0.4152	0.000509757	0.00302481
MUSK	18.665	-1.8498	0.5327	0.000515365	0.0030559
RPL39L	59.831	-1.0371	0.2989	0.000520863	0.00308185
LOC101241902	7.229	-4.3091	1.2427	0.000525164	0.00310174
TCF7	197.434	-1.0163	0.2937	0.000539576	0.0031789
LINC01173	37.733	-1.2424	0.3593	0.000544368	0.00320267
CYP26B1	24.42	-1.6004	0.4657	0.000589614	0.00343688
AFAP1L2	26.355	-1.4151	0.4119	0.000591868	0.00344758
THBS2	29.478	-1.3201	0.385	0.00060588	0.00352547
LOC171391	54.334	-1.1223	0.3273	0.000606393	0.00352721
SLC1A1	18.267	-1.6089	0.4711	0.000637679	0.0036871
SRGAP2D	32.148	-1.2546	0.3674	0.000638259	0.00368916
ARHGAP11A	33.653	-1.2062	0.3551	0.000681975	0.0039226
ACADL	33.478	-1.3236	0.3918	0.000728642	0.00414909
GABRQ	22.845	-1.6899	0.504	0.000799073	0.00448626
SEMA5A	37.763	-1.2268	0.3664	0.000812349	0.00454266
LOC102724227	11.587	-2.2346	0.6712	0.000870109	0.00479987
SAMD12	66.535	-1.0051	0.3019	0.000870562	0.00479987
LOC107985481	11.66	-2.5632	0.77	0.000872424	0.00480693
ELOVL2-AS1	16.814	-1.6635	0.5	0.000878216	0.00483561
XK	43.671	-1.0569	0.3177	0.000879617	0.00484171
FAM167B	24.466	-1.4499	0.4377	0.000925291	0.00505601
DBNDD1	24.622	-1.3057	0.4002	0.00110228	0.00587748
MIR133A1HG	17.827	-1.7999	0.5519	0.00110833	0.00590371
IMPA2	55.585	-1.0029	0.3112	0.00127111	0.00662743
ERLEC1P1	34.451	-1.2826	0.3986	0.0012907	0.00671898
RPL13P8	12.287	-1.9726	0.619	0.00143895	0.00737669
OGN	14.791	-1.7089	0.5381	0.00149578	0.00763246
LOC101927476	9.05	-2.0864	0.6588	0.00153987	0.00783079
DPY19L2P2	38.571	-1.1829	0.3746	0.0015886	0.00805378
TESMIN	10.723	-2.7581	0.8736	0.00159225	0.00806486
ANKRD45	13.807	-1.9028	0.6038	0.00162348	0.0082029
COMTD1	43.539	-1.1452	0.3635	0.00162832	0.00821726
LOC107986925	17.561	-1.6774	0.5383	0.00183105	0.00909845
PMCH	15.405	-1.7045	0.5472	0.00184025	0.00913594
GAS5-AS1	34.804	-1.0197	0.3288	0.00192656	0.00949869
RASSF2	37.619	-1.2288	0.3963	0.00193268	0.00952603
ABCB4	15.465	-1.8085	0.5837	0.00194457	0.0095732

## Sheet: ARCHS4_Kinases_UP
ARCHS4 Kinases Coexpression | Upregulated DEGs | Sorted by Adjusted P-value | Bold = shown in figure
Top 20 sig. → orange | Other sig. → yellow | Bold = in figure (1) | Significant (adj.p<0.05): 11/436
Term	Overlap	Overlap (%)	P-value	Adjusted P-value	Odds Ratio	Combined Score	Genes
IRAK2 human kinase ARCHS4 coexpression	34/299	11.37	2.66075e-18	1.16009e-15	7.9993	323.714	CSF3;CXCL8;TNFAIP6;SRXN1;NCF2;CXCL1;SLC7A11;CXCL3;CXCL2;ICAM1;RELB;OASL;ZC3H12A;NFKBIZ;TOM1;HMOX1;BID;SERPINB2;TPRA1;TRAF1;SOD2;NFKB2;NFKBIA;C15ORF48;IL6;IL1B;TNIP3;TFEC;PPIF;NFKBIE;SQSTM1;ATF3;HBEGF;FTL
RIPK2 human kinase ARCHS4 coexpression	30/299	10.03	8.65396e-15	1.88656e-12	6.8635	222.246	CXCL8;TNFAIP6;CXCL1;CXCL3;SAT1;CXCL2;CTSS;ICAM1;RELB;OASL;GNA15;IRAK2;ZC3H12A;NFKBIZ;CASP1;BID;SERPINB2;TRAF1;SOD2;NFKB2;NFKBIA;IL6;IL1B;TNIP3;TFEC;PPIF;NFKBIE;ATF3;HBEGF;FTL
MAP3K8 human kinase ARCHS4 coexpression	28/299	9.36	3.91346e-13	5.68756e-11	6.3179	180.497	CXCL8;TNFAIP6;NCF2;CXCL3;CXCL2;CTSS;ICAM1;RELB;GNA15;IRAK2;ZC3H12A;NFKBIZ;CASP1;BID;JUNB;SERPINB2;GADD45B;TRAF1;SOD2;MCOLN2;NFKB2;NFKBIA;IL6;IL1B;TNIP3;TFEC;NFKBIE;ATF3
SRC human kinase ARCHS4 coexpression	25/299	8.36	8.69482e-11	7.58188e-09	5.5261	128.015	CXCL8;TNFAIP6;SRXN1;DTX2;SLC7A11;CXCL3;CXCL2;ICAM1;RELB;IRAK2;ZC3H12A;TOM1;HMOX1;SERPINB2;TPRA1;OSGIN1;TRAF1;SOD2;NFKB2;C15ORF48;IL1B;TNIP3;PPIF;NFKBIE;FTL
PLK3 human kinase ARCHS4 coexpression	25/299	8.36	8.69482e-11	7.58188e-09	5.5261	128.015	CXCL8;NCF2;CXCL3;CXCL2;CTSS;ICAM1;RELB;SERTAD1;IRAK2;NFKBIZ;TOM1;JUNB;SERPINB2;GADD45B;TRAF1;SOD2;NFKB2;NFKBIA;C15ORF48;IL1B;TNIP3;PPIF;NFKBIE;ATF3;FTL
DYRK3 human kinase ARCHS4 coexpression	24/299	8.03	4.81908e-10	3.50187e-08	5.269	113.037	BATF2;CSF3;SERPINB2;TPRA1;TXNRD1;TFPI2;SLC7A11;SLC1A5;TRAF1;CXCL3;SOD2;CXCL2;ICAM1;NFKB2;IL6;IRAK2;TNIP3;ZC3H12A;SESN2;TRIB3;SQSTM1;ST6GALNAC4;ATF3;FTL
PIM3 human kinase ARCHS4 coexpression	21/299	7.02	6.159e-08	3.83617e-06	4.5177	75.0061	SERPINB2;CXCL8;GADD45B;DTX2;TRAF1;CXCL3;SOD2;CXCL2;ICAM1;RELB;GNA15;IRAK2;IL1B;TNIP3;ZC3H12A;TOM1;PPIF;NFKBIE;JUNB;ATF3;FTL
SGK1 human kinase ARCHS4 coexpression	17/299	5.69	1.89575e-05	0.00103318	3.5606	38.7155	CXCL8;GADD45B;NCF2;SLC7A11;CTSS;APOLD1;ICAM1;SLC6A6;IRAK2;ZC3H12A;TFEC;NFKBIZ;TOM1;PPIF;SQSTM1;ATF3;HBEGF
ABL2 human kinase ARCHS4 coexpression	16/299	5.35	6.85777e-05	0.00332221	3.329	31.9168	TM4SF19;TGFB2;SERPINB2;CXCL8;TXNRD1;CXCL1;SLC7A11;CXCL3;SOD2;CXCL2;ICAM1;IRAK2;KYNU;ATP6V0D2;ATF3;HBEGF
MAP2K3 human kinase ARCHS4 coexpression	15/299	5.02	0.000232684	0.010145	3.1004	25.937	DGKG;SERPINB2;NCF2;TALDO1;TRAF1;CXCL3;CTSS;ICAM1;RELB;NFKB2;IRAK2;ZC3H12A;TOM1;PPIF;FTL
TRIB3 human kinase ARCHS4 coexpression	14/299	4.68	0.00073816	0.029258	2.8746	20.7301	SRXN1;ADRM1;ASNS;SLC7A11;SLC1A5;POR;PSAT1;DDIT3;DDIT4;SESN2;CHAC1;SEPHS2;SQSTM1;ATF4
TRIB1 human kinase ARCHS4 coexpression	13/299	4.35	0.00218179	0.0679473	2.6518	16.2494	CXCL8;GADD45B;ICAM1;NFKB2;NFKBIA;C17ORF107;SERTAD1;ZC3H12A;NFKBIZ;PPIF;JUNB;ATF3;HBEGF
MAPK13 human kinase ARCHS4 coexpression	13/299	4.35	0.00218179	0.0679473	2.6518	16.2494	NCF2;ACSL5;DTX2;CTSS;ICAM1;RELB;NFKB2;C15ORF48;SLC6A6;ZC3H12A;TOM1;HMOX1;FTL
RNASEL human kinase ARCHS4 coexpression	13/299	4.35	0.00218179	0.0679473	2.6518	16.2494	TRIM16L;LIMCH1;HTRA3;TXNRD1;IFRD1;TMTC1;SLC3A2;SLC7A11;SLC6A6;KYNU;IL7R;SQSTM1;UNKL
DAPK1 human kinase ARCHS4 coexpression	12/299	4.01	0.0059853	0.163099	2.4319	12.4474	SLC6A6;GNA15;TFEC;HMOX1;TRAF1;NFKBIE;CXCL3;SOD2;CD34;ICAM1;FTL;NFKB2
RIPK1 human kinase ARCHS4 coexpression	12/299	4.01	0.0059853	0.163099	2.4319	12.4474	SLC6A6;BATF2;NCF2;ZC3H12A;TOM1;TRAF1;SOD2;CTSS;ICAM1;RELB;NFKB2;OASL
CAMK1 human kinase ARCHS4 coexpression	11/299	3.68	0.0151752	0.315067	2.2147	9.2754	ATP6V0B;TPRA1;NCF2;TOM1;PPIF;HMOX1;BID;NFKBIE;ATP6V0D2;CTSS;FTL
PIM2 human kinase ARCHS4 coexpression	11/299	3.68	0.0151752	0.315067	2.2147	9.2754	IL32;NFKBIA;SYNGR2;SH2D2A;CTSW;TRAF1;IL7R;ARHGAP25;LIMD2;RELB;NFKB2
NEK6 human kinase ARCHS4 coexpression	11/299	3.68	0.0151752	0.315067	2.2147	9.2754	SYNGR2;TOM1;PPIF;HMOX1;SLC7A11;TRAF1;NFKBIE;SQSTM1;ICAM1;FTL;NFKB2
FLT1 human kinase ARCHS4 coexpression	11/299	3.68	0.0151752	0.315067	2.2147	9.2754	MYCT1;CSF3;HEY1;LIMCH1;SERPINE1;HMOX1;CXCL1;CD34;CXCL2;APOLD1;PGF
MERTK human kinase ARCHS4 coexpression	11/299	3.68	0.0151752	0.315067	2.2147	9.2754	C3;TPRA1;TFEC;SPP1;TOM1;HMOX1;TRIM47;NFKBIE;CXCL3;CXCL5;FTL
STK17B human kinase ARCHS4 coexpression	10/299	3.34	0.0353973	0.61733	2.0003	6.6833	IL32;NFKBIA;SH2D2A;NFKBIZ;CASP1;CTSW;IL7R;ARHGAP25;CTSS;LIMD2
CSF1R human kinase ARCHS4 coexpression	10/299	3.34	0.0353973	0.61733	2.0003	6.6833	NCF2;TFEC;SPP1;TOM1;HMOX1;NFKBIE;CXCL3;CTSS;ICAM1;FTL
EIF2AK3 human kinase ARCHS4 coexpression	10/299	3.34	0.0353973	0.61733	2.0003	6.6833	GADD45B;ZC3H12A;NFKBIZ;TRAF1;NFKBIE;MCOLN2;ATF4;SEL1L3;NFKB2;BIRC3
IKBKE human kinase ARCHS4 coexpression	10/299	3.34	0.0353973	0.61733	2.0003	6.6833	NCF2;CASP1;TALDO1;IL7R;JUNB;ARHGAP25;CTSS;LIMD2;RELB;NFKB2
RPS6KA3 human kinase ARCHS4 coexpression	9/299	3.01	0.0755885	0.994709	1.7886	4.6191	C3;SLC6A6;COL27A1;ABCC2;GSR;ACSL5;AFP;IL7R;CTSS
PIM1 human kinase ARCHS4 coexpression	8/299	2.68	0.147016	0.994709	1.5797	3.0285	SLC6A6;NCF2;TALDO1;ARHGAP25;CTSS;LIMD2;RELB;NFKB2
BLK human kinase ARCHS4 coexpression	8/299	2.68	0.147016	0.994709	1.5797	3.0285	VAMP1;TRAF1;ARHGAP25;MAP3K14;MCOLN2;LIMD2;SEL1L3;BIRC3
BMX human kinase ARCHS4 coexpression	8/299	2.68	0.147016	0.994709	1.5797	3.0285	MYCT1;NCF2;DNAJB4;SERPINE1;ICAM2;ANKRD1;PIR;PGF
TEC human kinase ARCHS4 coexpression	8/299	2.68	0.147016	0.994709	1.5797	3.0285	NFKBIA;GNA15;TFEC;TALDO1;TRAF1;CLIC2;CD34;MCOLN2
STK38L human kinase ARCHS4 coexpression	7/299	2.34	0.259129	0.994709	1.3733	1.8546	NCF2;PPIF;SLC7A11;TRAF1;MCOLN2;CTSS;HBEGF
MAPKAPK2 human kinase ARCHS4 coexpression	7/299	2.34	0.259129	0.994709	1.3733	1.8546	ZC3H12A;TOM1;PPIF;TRAF1;ICAM1;RELB;NFKB2
MAPKAPK3 human kinase ARCHS4 coexpression	7/299	2.34	0.259129	0.994709	1.3733	1.8546	SLC6A6;GNA15;NCF2;TFEC;TALDO1;CTSS;LIMD2
MYLK4 human kinase ARCHS4 coexpression	7/299	2.34	0.259129	0.994709	1.3733	1.8546	ANKRD39;CYB5R1;POPDC3;HSPB8;PLA2G4C;XIRP1;TMEM182
STK17A human kinase ARCHS4 coexpression	7/299	2.34	0.259129	0.994709	1.3733	1.8546	TRAF1;IL7R;JUNB;ARHGAP25;TUBA4A;LIMD2;NFKB2
MAPK9 human kinase ARCHS4 coexpression	7/299	2.34	0.259129	0.994709	1.3733	1.8546	NQO1;NEDD8-MDP1;SRXN1;TXNRD1;GSR;GCLM;PSPH
IRAK3 human kinase ARCHS4 coexpression	7/299	2.34	0.259129	0.994709	1.3733	1.8546	SLC6A6;NCF2;TFEC;NFKBIZ;CASP1;ARHGAP25;CTSS
ALK human kinase ARCHS4 coexpression	7/299	2.34	0.259129	0.994709	1.3733	1.8546	MLLT11;TMOD1;GBA;TMEM132A;NFKBIE;SLC12A8;PGF
KDR human kinase ARCHS4 coexpression	7/299	2.34	0.259129	0.994709	1.3733	1.8546	NQO1;MYCT1;HEY1;TBC1D7;PIR;CD34;PGF
TIE1 human kinase ARCHS4 coexpression	7/299	2.34	0.259129	0.994709	1.3733	1.8546	MYCT1;HTRA3;SERPINE1;ICAM2;ANKRD1;CD34;PGF
TNK1 human kinase ARCHS4 coexpression	7/299	2.34	0.259129	0.994709	1.3733	1.8546	POR;SYNGR2;TMEM79;STYK1;HSPB1;TRIM47;SLC1A5
PLK2 human kinase ARCHS4 coexpression	7/299	2.34	0.259129	0.994709	1.3733	1.8546	TGFB2;BAMBI;TUFT1;TXNRD1;TMEM132A;SLC3A2;TRIM16
ALPK2 human kinase ARCHS4 coexpression	7/299	2.34	0.259129	0.994709	1.3733	1.8546	POPDC3;TGFB2;HSPB8;ANKRD1;XIRP1;TMTC1;ALDH1L2
PRKCH human kinase ARCHS4 coexpression	6/299	2.01	0.412117	0.994709	1.1696	1.0368	SH2D2A;IL7R;JUNB;ARHGAP25;CTSS;LIMD2
PRKCQ human kinase ARCHS4 coexpression	6/299	2.01	0.412117	0.994709	1.1696	1.0368	CYB5R1;POPDC3;HSPB8;XIRP1;IL7R;LIMD2
SGK3 human kinase ARCHS4 coexpression	6/299	2.01	0.412117	0.994709	1.1696	1.0368	BCAS4;KCNE4;KYNU;PLA2G4C;TMEM182;ATP6V0D2
STK38 human kinase ARCHS4 coexpression	6/299	2.01	0.412117	0.994709	1.1696	1.0368	NCF2;CASP1;IL7R;ARHGAP25;CTSS;LIMD2
MYLK2 human kinase ARCHS4 coexpression	6/299	2.01	0.412117	0.994709	1.1696	1.0368	ANKRD39;CYB5R1;POPDC3;RRAD;HSPB8;XIRP1
PHKG1 human kinase ARCHS4 coexpression	6/299	2.01	0.412117	0.994709	1.1696	1.0368	ANKRD39;CYB5R1;POPDC3;HSPB8;PLA2G4C;XIRP1
TRIB2 human kinase ARCHS4 coexpression	6/299	2.01	0.412117	0.994709	1.1696	1.0368	MLLT11;DGKG;UCHL1;HEY1;MAP2;NRCAM
CDK5 human kinase ARCHS4 coexpression	6/299	2.01	0.412117	0.994709	1.1696	1.0368	MLLT11;UCHL1;ATP6V0B;B3GAT3;PRDX1;ADRM1
CDKL2 human kinase ARCHS4 coexpression	6/299	2.01	0.412117	0.994709	1.1696	1.0368	MLLT11;CDKL3;BEX2;UCHL1;MAP2;HSPA4L
CLK1 human kinase ARCHS4 coexpression	6/299	2.01	0.412117	0.994709	1.1696	1.0368	IFRD1;NFKBIZ;IL7R;JUNB;ARHGAP25;CTSS
MAP3K14 human kinase ARCHS4 coexpression	6/299	2.01	0.412117	0.994709	1.1696	1.0368	TRAF1;NFKBIE;LIMD2;RELB;NFKB2;BIRC3
IRAK4 human kinase ARCHS4 coexpression	6/299	2.01	0.412117	0.994709	1.1696	1.0368	NCF2;CASP1;IL7R;ARHGAP25;CTSS;LIMD2
LIMK2 human kinase ARCHS4 coexpression	6/299	2.01	0.412117	0.994709	1.1696	1.0368	SLC6A6;BATF2;NCF2;ARHGAP25;CTSS;NFKB2
BTK human kinase ARCHS4 coexpression	6/299	2.01	0.412117	0.994709	1.1696	1.0368	NCF2;TFEC;TALDO1;ARHGAP25;CTSS;LIMD2
EPHA3 human kinase ARCHS4 coexpression	6/299	2.01	0.412117	0.994709	1.1696	1.0368	MLLT11;MAP2;GDPD1;NRCAM;LIN7B;SEL1L3
FGFR3 human kinase ARCHS4 coexpression	6/299	2.01	0.412117	0.994709	1.1696	1.0368	C3;POR;COL27A1;ABCC2;MAP3K10;CLDN1
FGFR4 human kinase ARCHS4 coexpression	6/299	2.01	0.412117	0.994709	1.1696	1.0368	C3;POR;COL27A1;ABCC2;AFP;SEPHS2
FGR human kinase ARCHS4 coexpression	6/299	2.01	0.412117	0.994709	1.1696	1.0368	SLC6A6;NCF2;CASP1;ARHGAP25;CTSS;LIMD2
KIT human kinase ARCHS4 coexpression	6/299	2.01	0.412117	0.994709	1.1696	1.0368	HERC5;MYCT1;GNA15;ANGPT1;TBC1D7;CD34
SYK human kinase ARCHS4 coexpression	6/299	2.01	0.412117	0.994709	1.1696	1.0368	NCF2;TFEC;CASP1;ARHGAP25;CTSS;LIMD2
TXK human kinase ARCHS4 coexpression	6/299	2.01	0.412117	0.994709	1.1696	1.0368	IL32;NFKBIA;CTSW;IL7R;ARHGAP25;LIMD2
EIF2AK2 human kinase ARCHS4 coexpression	6/299	2.01	0.412117	0.994709	1.1696	1.0368	HERC5;BATF2;KYNU;TRAF1;SOD2;OASL
ERN1 human kinase ARCHS4 coexpression	6/299	2.01	0.412117	0.994709	1.1696	1.0368	NFKBIA;NCF2;IL7R;ARHGAP25;CTSS;LIMD2
TBCK human kinase ARCHS4 coexpression	6/299	2.01	0.412117	0.994709	1.1696	1.0368	MLLT11;MAP2;KCNE4;KYNU;TMEM182;BEST3
ALPK3 human kinase ARCHS4 coexpression	6/299	2.01	0.412117	0.994709	1.1696	1.0368	CYB5R1;POPDC3;RRAD;HSPB8;ANKRD1;XIRP1
PRKCB human kinase ARCHS4 coexpression	5/299	1.67	0.589917	0.994709	0.9684	0.5111	NCF2;VAMP1;SYP;ARHGAP25;CTSS
PRKG1 human kinase ARCHS4 coexpression	5/299	1.67	0.589917	0.994709	0.9684	0.5111	CYB5R1;POPDC3;HSPB8;XIRP1;TMTC1
PRKG2 human kinase ARCHS4 coexpression	5/299	1.67	0.589917	0.994709	0.9684	0.5111	MYCT1;ANGPT1;TFEC;ACSL5;CD34
RPS6KA1 human kinase ARCHS4 coexpression	5/299	1.67	0.589917	0.994709	0.9684	0.5111	SLC6A6;NCF2;ARHGAP25;CTSS;LIMD2
CAMK2G human kinase ARCHS4 coexpression	5/299	1.67	0.589917	0.994709	0.9684	0.5111	GOLGA7B;GABARAPL1;VAMP1;MAP3K10;SYP
MYLK3 human kinase ARCHS4 coexpression	5/299	1.67	0.589917	0.994709	0.9684	0.5111	KCNE4;KYNU;TMEM182;NUPR1;TMEM45A
NUAK1 human kinase ARCHS4 coexpression	5/299	1.67	0.589917	0.994709	0.9684	0.5111	PRDX1;ANKRD1;GCNT3;FSIP1;HBEGF
NUAK2 human kinase ARCHS4 coexpression	5/299	1.67	0.589917	0.994709	0.9684	0.5111	NCF2;ARHGAP25;MAP3K14;CTSS;LIMD2
OBSCN human kinase ARCHS4 coexpression	5/299	1.67	0.589917	0.994709	0.9684	0.5111	CYB5R1;POPDC3;RRAD;HSPB8;XIRP1
PHKG2 human kinase ARCHS4 coexpression	5/299	1.67	0.589917	0.994709	0.9684	0.5111	NMNAT1;CHPF2;MEIOC;OAZ3;LIMD2
SPEG human kinase ARCHS4 coexpression	5/299	1.67	0.589917	0.994709	0.9684	0.5111	CYB5R1;POPDC3;RRAD;HSPB8;XIRP1
STK40 human kinase ARCHS4 coexpression	5/299	1.67	0.589917	0.994709	0.9684	0.5111	SLC6A6;NCF2;TOM1;CTSS;NFKB2
CDK20 human kinase ARCHS4 coexpression	5/299	1.67	0.589917	0.994709	0.9684	0.5111	MLLT11;BEX2;UCHL1;ATP6V0B;MAP2
MAPK10 human kinase ARCHS4 coexpression	5/299	1.67	0.589917	0.994709	0.9684	0.5111	MLLT11;UCHL1;NRCAM;SYP;DYNC1I1
MAPK12 human kinase ARCHS4 coexpression	5/299	1.67	0.589917	0.994709	0.9684	0.5111	CYB5R1;POPDC3;HSPB8;XIRP1;MAP3K10
SRPK2 human kinase ARCHS4 coexpression	5/299	1.67	0.589917	0.994709	0.9684	0.5111	BEX2;MAP2;HSPA4L;NRCAM;SYP
MAP2K4 human kinase ARCHS4 coexpression	5/299	1.67	0.589917	0.994709	0.9684	0.5111	GOLGA7B;PRNP;GABARAPL1;SYP;DYNC1I1
MAP3K19 human kinase ARCHS4 coexpression	5/299	1.67	0.589917	0.994709	0.9684	0.5111	RRAD;DNAJA4;FSIP1;IQCG;ENKUR
MAP3K2 human kinase ARCHS4 coexpression	5/299	1.67	0.589917	0.994709	0.9684	0.5111	SLC6A6;NCF2;IL7R;ARHGAP25;CTSS
MAP3K3 human kinase ARCHS4 coexpression	5/299	1.67	0.589917	0.994709	0.9684	0.5111	SLC6A6;NCF2;ARHGAP25;CTSS;LIMD2
PAK3 human kinase ARCHS4 coexpression	5/299	1.67	0.589917	0.994709	0.9684	0.5111	MLLT11;BEX2;UCHL1;MAP2;DYNC1I1
LRRK2 human kinase ARCHS4 coexpression	5/299	1.67	0.589917	0.994709	0.9684	0.5111	SLC6A6;NCF2;CASP1;ARHGAP25;CTSS
RIPK3 human kinase ARCHS4 coexpression	5/299	1.67	0.589917	0.994709	0.9684	0.5111	NCF2;CASP1;ARHGAP25;CTSS;LIMD2
TNNI3K human kinase ARCHS4 coexpression	5/299	1.67	0.589917	0.994709	0.9684	0.5111	TMOD1;GABARAPL1;HSPB8;ANKRD1;XIRP1
EPHA10 human kinase ARCHS4 coexpression	5/299	1.67	0.589917	0.994709	0.9684	0.5111	LIPH;PLA2G4C;CPT1C;PHLDB3;LIN7B
EPHB6 human kinase ARCHS4 coexpression	5/299	1.67	0.589917	0.994709	0.9684	0.5111	GOLGA7B;PRNP;VAMP1;MAP3K10;SYP
ERBB2 human kinase ARCHS4 coexpression	5/299	1.67	0.589917	0.994709	0.9684	0.5111	POR;BAMBI;TMEM132A;HSPB1;CLDN1
FER human kinase ARCHS4 coexpression	5/299	1.67	0.589917	0.994709	0.9684	0.5111	MAP2;KCNE4;KYNU;TMEM182;ZNF300P1
FRK human kinase ARCHS4 coexpression	5/299	1.67	0.589917	0.994709	0.9684	0.5111	KCNE4;KYNU;TMEM182;SOD2;TMEM45A
HCK human kinase ARCHS4 coexpression	5/299	1.67	0.589917	0.994709	0.9684	0.5111	SLC6A6;NCF2;CASP1;ARHGAP25;CTSS
ITK human kinase ARCHS4 coexpression	5/299	1.67	0.589917	0.994709	0.9684	0.5111	SH2D2A;IL7R;ARHGAP25;CTSS;LIMD2
JAK1 human kinase ARCHS4 coexpression	5/299	1.67	0.589917	0.994709	0.9684	0.5111	NCF2;CASP1;IL7R;ARHGAP25;CTSS
JAK2 human kinase ARCHS4 coexpression	5/299	1.67	0.589917	0.994709	0.9684	0.5111	NCF2;TFEC;CASP1;ARHGAP25;CTSS
LCK human kinase ARCHS4 coexpression	5/299	1.67	0.589917	0.994709	0.9684	0.5111	IL32;SH2D2A;CTSW;ARHGAP25;LIMD2
LYN human kinase ARCHS4 coexpression	5/299	1.67	0.589917	0.994709	0.9684	0.5111	SLC6A6;CASP1;ARHGAP25;CTSS;NFKB2
PDGFRA human kinase ARCHS4 coexpression	5/299	1.67	0.589917	0.994709	0.9684	0.5111	C1S;CRISPLD2;TMTC1;ZNF300P1;ALDH1L2
PTK2B human kinase ARCHS4 coexpression	5/299	1.67	0.589917	0.994709	0.9684	0.5111	NCF2;VAMP1;ARHGAP25;CTSS;LIMD2
TEK human kinase ARCHS4 coexpression	5/299	1.67	0.589917	0.994709	0.9684	0.5111	MYCT1;HTRA3;SERPINE1;APOLD1;PGF
PDIK1L human kinase ARCHS4 coexpression	5/299	1.67	0.589917	0.994709	0.9684	0.5111	MLLT11;MAP2;NRCAM;LIN7B;SEL1L3
PEAK1 human kinase ARCHS4 coexpression	5/299	1.67	0.589917	0.994709	0.9684	0.5111	KCNE4;KYNU;TMEM182;SOD2;TMEM45A
ADCK2 human kinase ARCHS4 coexpression	5/299	1.67	0.589917	0.994709	0.9684	0.5111	SYNGR2;AKAP8L;PPIF;SLC1A5;ATF4
ALPK1 human kinase ARCHS4 coexpression	5/299	1.67	0.589917	0.994709	0.9684	0.5111	NCF2;KCNE4;KYNU;TMEM182;SOD2
PDK4 human kinase ARCHS4 coexpression	5/299	1.67	0.589917	0.994709	0.9684	0.5111	TMOD1;LIMCH1;HSPB8;ENPP2;XIRP1
DMPK human kinase ARCHS4 coexpression	4/299	1.34	0.761019	0.994709	0.7698	0.2102	CYB5R1;HSPB8;ANKRD1;XIRP1
GRK2 human kinase ARCHS4 coexpression	4/299	1.34	0.761019	0.994709	0.7698	0.2102	NCF2;ARHGAP25;CTSS;LIMD2
GRK6 human kinase ARCHS4 coexpression	4/299	1.34	0.761019	0.994709	0.7698	0.2102	NCF2;ARHGAP25;CTSS;LIMD2
PRKACB human kinase ARCHS4 coexpression	4/299	1.34	0.761019	0.994709	0.7698	0.2102	PRNP;MAP2;SYP;DYNC1I1
PRKCD human kinase ARCHS4 coexpression	4/299	1.34	0.761019	0.994709	0.7698	0.2102	SLC6A6;NCF2;CTSS;NFKB2
PRKCE human kinase ARCHS4 coexpression	4/299	1.34	0.761019	0.994709	0.7698	0.2102	PRNP;GABARAPL1;MAP3K10;SYP
RPS6KA5 human kinase ARCHS4 coexpression	4/299	1.34	0.761019	0.994709	0.7698	0.2102	BCAS4;NMNAT1;TMEM182;OAZ3
RPS6KB1 human kinase ARCHS4 coexpression	4/299	1.34	0.761019	0.994709	0.7698	0.2102	BAMBI;KYNU;HSPB1;SLC1A5
SGK2 human kinase ARCHS4 coexpression	4/299	1.34	0.761019	0.994709	0.7698	0.2102	C3;POR;AKR1C1;AKR1C3
CAMK1D human kinase ARCHS4 coexpression	4/299	1.34	0.761019	0.994709	0.7698	0.2102	GOLGA7B;VAMP1;MAP3K10;SYP
CAMK2B human kinase ARCHS4 coexpression	4/299	1.34	0.761019	0.994709	0.7698	0.2102	GOLGA7B;MAP3K10;SYP;DYNC1I1
DAPK2 human kinase ARCHS4 coexpression	4/299	1.34	0.761019	0.994709	0.7698	0.2102	BCAS4;NMNAT1;PLA2G4C;TMEM182
DCLK1 human kinase ARCHS4 coexpression	4/299	1.34	0.761019	0.994709	0.7698	0.2102	UCHL1;MAP2;SYP;DYNC1I1
DCLK2 human kinase ARCHS4 coexpression	4/299	1.34	0.761019	0.994709	0.7698	0.2102	UCHL1;HEY1;MAP2;NRCAM
MYLK human kinase ARCHS4 coexpression	4/299	1.34	0.761019	0.994709	0.7698	0.2102	C1S;CRISPLD2;TMTC1;ALDH1L2
PASK human kinase ARCHS4 coexpression	4/299	1.34	0.761019	0.994709	0.7698	0.2102	IL7R;JUNB;MAP3K14;LIMD2
PRKAA1 human kinase ARCHS4 coexpression	4/299	1.34	0.761019	0.994709	0.7698	0.2102	TXNRD1;GBA;GSR;GCLM
PRKAA2 human kinase ARCHS4 coexpression	4/299	1.34	0.761019	0.994709	0.7698	0.2102	ANKRD39;POPDC3;HSPB8;XIRP1
SIK1 human kinase ARCHS4 coexpression	4/299	1.34	0.761019	0.994709	0.7698	0.2102	ZC3H12A;SLC3A2;JUNB;ATF3
SIK2 human kinase ARCHS4 coexpression	4/299	1.34	0.761019	0.994709	0.7698	0.2102	GABARAPL1;PCOLCE2;C1S;TMTC1
SNRK human kinase ARCHS4 coexpression	4/299	1.34	0.761019	0.994709	0.7698	0.2102	NCF2;IL7R;ARHGAP25;CTSS
TTN human kinase ARCHS4 coexpression	4/299	1.34	0.761019	0.994709	0.7698	0.2102	CYB5R1;POPDC3;HSPB8;XIRP1
CDK9 human kinase ARCHS4 coexpression	4/299	1.34	0.761019	0.994709	0.7698	0.2102	AKAP8L;TOM1;RELB;NFKB2
CDKL5 human kinase ARCHS4 coexpression	4/299	1.34	0.761019	0.994709	0.7698	0.2102	MAP2;KCNE4;KYNU;TMEM182
DYRK1B human kinase ARCHS4 coexpression	4/299	1.34	0.761019	0.994709	0.7698	0.2102	POPDC3;RRAD;HSPB8;XIRP1
MAPK14 human kinase ARCHS4 coexpression	4/299	1.34	0.761019	0.994709	0.7698	0.2102	SLC6A6;NCF2;ARHGAP25;CTSS
MAPK15 human kinase ARCHS4 coexpression	4/299	1.34	0.761019	0.994709	0.7698	0.2102	RRAD;DNAJA4;IQCG;ENKUR
MAPK6 human kinase ARCHS4 coexpression	4/299	1.34	0.761019	0.994709	0.7698	0.2102	PSAT1;ASNS;ZNF300P1;SLC7A11
MAPK7 human kinase ARCHS4 coexpression	4/299	1.34	0.761019	0.994709	0.7698	0.2102	MEIOC;PHLDB3;ATP6V0D2;APOLD1
SRPK3 human kinase ARCHS4 coexpression	4/299	1.34	0.761019	0.994709	0.7698	0.2102	CYB5R1;POPDC3;HSPB8;XIRP1
NEK10 human kinase ARCHS4 coexpression	4/299	1.34	0.761019	0.994709	0.7698	0.2102	RRAD;DNAJA4;IQCG;ENKUR
NEK11 human kinase ARCHS4 coexpression	4/299	1.34	0.761019	0.994709	0.7698	0.2102	DNAJA4;FSIP1;IQCG;ENKUR
NEK5 human kinase ARCHS4 coexpression	4/299	1.34	0.761019	0.994709	0.7698	0.2102	NMNAT1;LIPH;MEIOC;OAZ3
MAP3K1 human kinase ARCHS4 coexpression	4/299	1.34	0.761019	0.994709	0.7698	0.2102	NCF2;IL7R;ARHGAP25;CTSS
MAP3K5 human kinase ARCHS4 coexpression	4/299	1.34	0.761019	0.994709	0.7698	0.2102	SLC6A6;NCF2;ARHGAP25;CTSS
MAP3K9 human kinase ARCHS4 coexpression	4/299	1.34	0.761019	0.994709	0.7698	0.2102	UCHL1;MAP2;SYP;DYNC1I1
PAK1 human kinase ARCHS4 coexpression	4/299	1.34	0.761019	0.994709	0.7698	0.2102	GABARAPL1;NCF2;MAP3K10;SYP
PAK5 human kinase ARCHS4 coexpression	4/299	1.34	0.761019	0.994709	0.7698	0.2102	MLLT11;BEX2;UCHL1;MAP2
STK10 human kinase ARCHS4 coexpression	4/299	1.34	0.761019	0.994709	0.7698	0.2102	NCF2;ARHGAP25;CTSS;LIMD2
STK3 human kinase ARCHS4 coexpression	4/299	1.34	0.761019	0.994709	0.7698	0.2102	KCNE4;KYNU;TMEM182;TMEM45A
STK4 human kinase ARCHS4 coexpression	4/299	1.34	0.761019	0.994709	0.7698	0.2102	NCF2;IL7R;ARHGAP25;CTSS
STRADB human kinase ARCHS4 coexpression	4/299	1.34	0.761019	0.994709	0.7698	0.2102	NCF2;ARHGAP25;ST6GALNAC4;CTSS
ACVR1C human kinase ARCHS4 coexpression	4/299	1.34	0.761019	0.994709	0.7698	0.2102	EGR1;LIMCH1;ENPP2;CRYM
ACVRL1 human kinase ARCHS4 coexpression	4/299	1.34	0.761019	0.994709	0.7698	0.2102	HTRA3;SERPINE1;ICAM2;PGF
AMHR2 human kinase ARCHS4 coexpression	4/299	1.34	0.761019	0.994709	0.7698	0.2102	SIRT4;AFP;PTGR1;PPP4R1L
ARAF human kinase ARCHS4 coexpression	4/299	1.34	0.761019	0.994709	0.7698	0.2102	SYNGR2;TOM1;LIMD2;NFKB2
LIMK1 human kinase ARCHS4 coexpression	4/299	1.34	0.761019	0.994709	0.7698	0.2102	TM4SF19;TMEM132A;HMOX1;MAP3K10
RAF1 human kinase ARCHS4 coexpression	4/299	1.34	0.761019	0.994709	0.7698	0.2102	SLC6A6;NCF2;ARHGAP25;CTSS
AXL human kinase ARCHS4 coexpression	4/299	1.34	0.761019	0.994709	0.7698	0.2102	NQO1;SERPINB2;DNAJB4;ANKRD1
CSK human kinase ARCHS4 coexpression	4/299	1.34	0.761019	0.994709	0.7698	0.2102	NCF2;ARHGAP25;LIMD2;NFKB2
DDR2 human kinase ARCHS4 coexpression	4/299	1.34	0.761019	0.994709	0.7698	0.2102	PCOLCE2;C1S;TMTC1;ALDH1L2
EGFR human kinase ARCHS4 coexpression	4/299	1.34	0.761019	0.994709	0.7698	0.2102	PCOLCE2;TMEM132A;TRIM47;NRCAM
EPHA5 human kinase ARCHS4 coexpression	4/299	1.34	0.761019	0.994709	0.7698	0.2102	MLLT11;MAP2;CPT1C;DYNC1I1
EPHB1 human kinase ARCHS4 coexpression	4/299	1.34	0.761019	0.994709	0.7698	0.2102	MLLT11;UCHL1;MAP2;GDPD1
FES human kinase ARCHS4 coexpression	4/299	1.34	0.761019	0.994709	0.7698	0.2102	NCF2;TALDO1;CTSS;LIMD2
FYN human kinase ARCHS4 coexpression	4/299	1.34	0.761019	0.994709	0.7698	0.2102	SH2D2A;IL7R;ARHGAP25;LIMD2
INSR human kinase ARCHS4 coexpression	4/299	1.34	0.761019	0.994709	0.7698	0.2102	EGR1;LIMCH1;SAT1;APOLD1
JAK3 human kinase ARCHS4 coexpression	4/299	1.34	0.761019	0.994709	0.7698	0.2102	NCF2;CASP1;ARHGAP25;LIMD2
MET human kinase ARCHS4 coexpression	4/299	1.34	0.761019	0.994709	0.7698	0.2102	TXNRD1;CLDN1;SQSTM1;EREG
PDGFRB human kinase ARCHS4 coexpression	4/299	1.34	0.761019	0.994709	0.7698	0.2102	C1S;HTRA3;TMTC1;ALDH1L2
PTK6 human kinase ARCHS4 coexpression	4/299	1.34	0.761019	0.994709	0.7698	0.2102	NMNAT1;LIPH;GCNT3;RRN3P3
RET human kinase ARCHS4 coexpression	4/299	1.34	0.761019	0.994709	0.7698	0.2102	HSPB8;TMEM132A;HSPB1;SLC1A5
ZAP70 human kinase ARCHS4 coexpression	4/299	1.34	0.761019	0.994709	0.7698	0.2102	IL7R;JUNB;ARHGAP25;LIMD2
CAMKK1 human kinase ARCHS4 coexpression	4/299	1.34	0.761019	0.994709	0.7698	0.2102	GOLGA7B;GABARAPL1;MAP3K10;SYP
CAMKK2 human kinase ARCHS4 coexpression	4/299	1.34	0.761019	0.994709	0.7698	0.2102	GOLGA7B;GABARAPL1;MAP3K10;SYP
MLKL human kinase ARCHS4 coexpression	4/299	1.34	0.761019	0.994709	0.7698	0.2102	NCF2;CASP1;ARHGAP25;CTSS
PLK5 human kinase ARCHS4 coexpression	4/299	1.34	0.761019	0.994709	0.7698	0.2102	GOLGA7B;ADM;SYP;DYNC1I1
SBK3 human kinase ARCHS4 coexpression	4/299	1.34	0.761019	0.994709	0.7698	0.2102	SRXN1;XIRP1;CHAC1;UNKL
STK31 human kinase ARCHS4 coexpression	4/299	1.34	0.761019	0.994709	0.7698	0.2102	HERC5;HSPA4L;MEIOC;LIN7B
STK32A human kinase ARCHS4 coexpression	4/299	1.34	0.761019	0.994709	0.7698	0.2102	MLLT11;UCHL1;NRCAM;TM7SF2
BCKDK human kinase ARCHS4 coexpression	4/299	1.34	0.761019	0.994709	0.7698	0.2102	SYNGR2;TPRA1;ADRM1;TALDO1
PDK2 human kinase ARCHS4 coexpression	4/299	1.34	0.761019	0.994709	0.7698	0.2102	CYB5R1;POPDC3;HSPB8;XIRP1
CDC42BPA human kinase ARCHS4 coexpression	3/299	1	0.891907	0.994709	0.5737	0.0656	SLC48A1;LIMCH1;ENPP2
GRK1 human kinase ARCHS4 coexpression	3/299	1	0.891907	0.994709	0.5737	0.0656	SLC6A6;PLA2G4C;SYP
GRK3 human kinase ARCHS4 coexpression	3/299	1	0.891907	0.994709	0.5737	0.0656	NCF2;TFEC;CTSS
GRK4 human kinase ARCHS4 coexpression	3/299	1	0.891907	0.994709	0.5737	0.0656	NMNAT1;PLA2G4C;OAZ3
MAST2 human kinase ARCHS4 coexpression	3/299	1	0.891907	0.994709	0.5737	0.0656	NECAB3;HSPB8;XIRP1
MAST3 human kinase ARCHS4 coexpression	3/299	1	0.891907	0.994709	0.5737	0.0656	NCF2;SYP;ARHGAP25
PRKCA human kinase ARCHS4 coexpression	3/299	1	0.891907	0.994709	0.5737	0.0656	TSPYL2;PRNP;MAP2
PRKCG human kinase ARCHS4 coexpression	3/299	1	0.891907	0.994709	0.5737	0.0656	GABARAPL1;MAP3K10;SYP
PRKCZ human kinase ARCHS4 coexpression	3/299	1	0.891907	0.994709	0.5737	0.0656	GABARAPL1;MAP3K10;SYP
PRKX human kinase ARCHS4 coexpression	3/299	1	0.891907	0.994709	0.5737	0.0656	SLC6A6;IL7R;ARHGAP25
ROCK1 human kinase ARCHS4 coexpression	3/299	1	0.891907	0.994709	0.5737	0.0656	NFKBIZ;IL7R;CTSS
ROCK2 human kinase ARCHS4 coexpression	3/299	1	0.891907	0.994709	0.5737	0.0656	COL27A1;ABCC2;TMTC1
RPS6KB2 human kinase ARCHS4 coexpression	3/299	1	0.891907	0.994709	0.5737	0.0656	SYNGR2;B3GAT3;ADRM1
BRSK1 human kinase ARCHS4 coexpression	3/299	1	0.891907	0.994709	0.5737	0.0656	GOLGA7B;MAP3K10;SYP
BRSK2 human kinase ARCHS4 coexpression	3/299	1	0.891907	0.994709	0.5737	0.0656	GOLGA7B;MAP3K10;SYP
CAMK1G human kinase ARCHS4 coexpression	3/299	1	0.891907	0.994709	0.5737	0.0656	GABARAPL1;SYP;DYNC1I1
CAMK2A human kinase ARCHS4 coexpression	3/299	1	0.891907	0.994709	0.5737	0.0656	GABARAPL1;MAP3K10;SYP
CAMK2D human kinase ARCHS4 coexpression	3/299	1	0.891907	0.994709	0.5737	0.0656	MYCT1;LIMCH1;PTGR1
CAMKV human kinase ARCHS4 coexpression	3/299	1	0.891907	0.994709	0.5737	0.0656	MAP2;MAP3K10;SYP
MAPKAPK5 human kinase ARCHS4 coexpression	3/299	1	0.891907	0.994709	0.5737	0.0656	BCAS4;NMNAT1;TMEM182
MARK1 human kinase ARCHS4 coexpression	3/299	1	0.891907	0.994709	0.5737	0.0656	MLLT11;BEX2;MAP2
MARK4 human kinase ARCHS4 coexpression	3/299	1	0.891907	0.994709	0.5737	0.0656	TMEM132A;MAP3K10;SYP
MKNK1 human kinase ARCHS4 coexpression	3/299	1	0.891907	0.994709	0.5737	0.0656	NCF2;ARHGAP25;CTSS
NIM1K human kinase ARCHS4 coexpression	3/299	1	0.891907	0.994709	0.5737	0.0656	PLA2G4C;MEIOC;ATP6V0D2
PNCK human kinase ARCHS4 coexpression	3/299	1	0.891907	0.994709	0.5737	0.0656	GOLGA7B;MAP3K10;SYP
PRKD2 human kinase ARCHS4 coexpression	3/299	1	0.891907	0.994709	0.5737	0.0656	NCF2;ARHGAP25;LIMD2
STK33 human kinase ARCHS4 coexpression	3/299	1	0.891907	0.994709	0.5737	0.0656	KCNE4;KYNU;TMEM182
CSNK1A1 human kinase ARCHS4 coexpression	3/299	1	0.891907	0.994709	0.5737	0.0656	SLC48A1;EGR1;ENPP2
TTBK2 human kinase ARCHS4 coexpression	3/299	1	0.891907	0.994709	0.5737	0.0656	MAP2;HSPA4L;DYNC1I1
VRK2 human kinase ARCHS4 coexpression	3/299	1	0.891907	0.994709	0.5737	0.0656	PRDX1;CLIC2;MCOLN2
CDK6 human kinase ARCHS4 coexpression	3/299	1	0.891907	0.994709	0.5737	0.0656	GNA15;ANGPT1;CD34
CDKL3 human kinase ARCHS4 coexpression	3/299	1	0.891907	0.994709	0.5737	0.0656	KCNE4;TMEM182;CPT1C
DYRK2 human kinase ARCHS4 coexpression	3/299	1	0.891907	0.994709	0.5737	0.0656	ACSL5;IL7R;CTSS
HIPK4 human kinase ARCHS4 coexpression	3/299	1	0.891907	0.994709	0.5737	0.0656	MAP3K10;SYP;UNKL
MAPK11 human kinase ARCHS4 coexpression	3/299	1	0.891907	0.994709	0.5737	0.0656	TMEM132A;MAP3K10;SYP
MAPK8 human kinase ARCHS4 coexpression	3/299	1	0.891907	0.994709	0.5737	0.0656	MLLT11;UCHL1;MAP2
MOK human kinase ARCHS4 coexpression	3/299	1	0.891907	0.994709	0.5737	0.0656	BCAS4;CPT1C;IQCG
NEK1 human kinase ARCHS4 coexpression	3/299	1	0.891907	0.994709	0.5737	0.0656	TMEM17;HSPA4L;MEIOC
NEK8 human kinase ARCHS4 coexpression	3/299	1	0.891907	0.994709	0.5737	0.0656	BCAS4;LIPH;HSCB
MAP2K5 human kinase ARCHS4 coexpression	3/299	1	0.891907	0.994709	0.5737	0.0656	MLLT11;PRNP;MAP2
MAP2K6 human kinase ARCHS4 coexpression	3/299	1	0.891907	0.994709	0.5737	0.0656	PLPP5;MEIOC;BCL2L2-PABPN1
MAP3K11 human kinase ARCHS4 coexpression	3/299	1	0.891907	0.994709	0.5737	0.0656	NCF2;LIMD2;NFKB2
MAP3K13 human kinase ARCHS4 coexpression	3/299	1	0.891907	0.994709	0.5737	0.0656	MLLT11;NMNAT1;MAP2
MAP4K1 human kinase ARCHS4 coexpression	3/299	1	0.891907	0.994709	0.5737	0.0656	JUNB;ARHGAP25;LIMD2
MAP4K5 human kinase ARCHS4 coexpression	3/299	1	0.891907	0.994709	0.5737	0.0656	CRISPLD2;KCNE4;TMEM45A
MYO3A human kinase ARCHS4 coexpression	3/299	1	0.891907	0.994709	0.5737	0.0656	TMOD1;BEX2;ENPP2
MYO3B human kinase ARCHS4 coexpression	3/299	1	0.891907	0.994709	0.5737	0.0656	NMNAT1;KCNE4;LIPH
NRK human kinase ARCHS4 coexpression	3/299	1	0.891907	0.994709	0.5737	0.0656	HERC5;PTPRR;SIRT4
PAK2 human kinase ARCHS4 coexpression	3/299	1	0.891907	0.994709	0.5737	0.0656	SLC6A6;NCF2;CTSS
PAK4 human kinase ARCHS4 coexpression	3/299	1	0.891907	0.994709	0.5737	0.0656	TMEM132A;HSPB1;SLC1A5
STRADA human kinase ARCHS4 coexpression	3/299	1	0.891907	0.994709	0.5737	0.0656	NFKBIA;NCF2;LIMD2
ACVR1 human kinase ARCHS4 coexpression	3/299	1	0.891907	0.994709	0.5737	0.0656	SRXN1;ALDH1L2;FTL
ILK human kinase ARCHS4 coexpression	3/299	1	0.891907	0.994709	0.5737	0.0656	ABHD4;TUBA4A;ENKUR
IRAK1 human kinase ARCHS4 coexpression	3/299	1	0.891907	0.994709	0.5737	0.0656	ADRM1;PPIF;SLC1A5
KSR1 human kinase ARCHS4 coexpression	3/299	1	0.891907	0.994709	0.5737	0.0656	SLC6A6;AKAP8L;NFKB2
RIPK4 human kinase ARCHS4 coexpression	3/299	1	0.891907	0.994709	0.5737	0.0656	POR;IL20RB;CLDN1
TESK2 human kinase ARCHS4 coexpression	3/299	1	0.891907	0.994709	0.5737	0.0656	ANGPT1;AFP;SAT1
TGFBR2 human kinase ARCHS4 coexpression	3/299	1	0.891907	0.994709	0.5737	0.0656	SLC6A6;NCF2;CTSS
AATK human kinase ARCHS4 coexpression	3/299	1	0.891907	0.994709	0.5737	0.0656	GABARAPL1;MAP3K10;SYP
EPHA1 human kinase ARCHS4 coexpression	3/299	1	0.891907	0.994709	0.5737	0.0656	PSAT1;PRDX1;GCNT2
EPHA2 human kinase ARCHS4 coexpression	3/299	1	0.891907	0.994709	0.5737	0.0656	TXNRD1;ADRM1;SLC1A5
EPHA7 human kinase ARCHS4 coexpression	3/299	1	0.891907	0.994709	0.5737	0.0656	MLLT11;MAP2;NRCAM
EPHA8 human kinase ARCHS4 coexpression	3/299	1	0.891907	0.994709	0.5737	0.0656	UCHL1;CENPV;RADIL
EPHB2 human kinase ARCHS4 coexpression	3/299	1	0.891907	0.994709	0.5737	0.0656	UCHL1;MAP2;TMEM132A
EPHB4 human kinase ARCHS4 coexpression	3/299	1	0.891907	0.994709	0.5737	0.0656	TMEM132A;HSPB1;SLC1A5
ERBB3 human kinase ARCHS4 coexpression	3/299	1	0.891907	0.994709	0.5737	0.0656	C3;COL27A1;ACSL5
ERBB4 human kinase ARCHS4 coexpression	3/299	1	0.891907	0.994709	0.5737	0.0656	MYCT1;PTGR1;DYNC1I1
FLT3 human kinase ARCHS4 coexpression	3/299	1	0.891907	0.994709	0.5737	0.0656	GNA15;TFEC;CD34
FLT4 human kinase ARCHS4 coexpression	3/299	1	0.891907	0.994709	0.5737	0.0656	HTRA3;CD34;PGF
LMTK3 human kinase ARCHS4 coexpression	3/299	1	0.891907	0.994709	0.5737	0.0656	GOLGA7B;MAP3K10;SYP
MATK human kinase ARCHS4 coexpression	3/299	1	0.891907	0.994709	0.5737	0.0656	TMOD1;TPRA1;PIR
MUSK human kinase ARCHS4 coexpression	3/299	1	0.891907	0.994709	0.5737	0.0656	DNAJB4;ANKRD1;FSIP1
ROS1 human kinase ARCHS4 coexpression	3/299	1	0.891907	0.994709	0.5737	0.0656	ANGPTL4;MMP10;PNLIPRP3
STYK1 human kinase ARCHS4 coexpression	3/299	1	0.891907	0.994709	0.5737	0.0656	DNAJB4;ACSL5;GCNT3
TYK2 human kinase ARCHS4 coexpression	3/299	1	0.891907	0.994709	0.5737	0.0656	NCF2;LIMD2;NFKB2
AAK1 human kinase ARCHS4 coexpression	3/299	1	0.891907	0.994709	0.5737	0.0656	KCNE4;KYNU;TMEM182
AURKC human kinase ARCHS4 coexpression	3/299	1	0.891907	0.994709	0.5737	0.0656	YRDC;SERTAD1;UNKL
BMP2K human kinase ARCHS4 coexpression	3/299	1	0.891907	0.994709	0.5737	0.0656	SLC6A6;TFEC;CTSS
CHUK human kinase ARCHS4 coexpression	3/299	1	0.891907	0.994709	0.5737	0.0656	SRXN1;TXNRD1;GSR
DSTYK human kinase ARCHS4 coexpression	3/299	1	0.891907	0.994709	0.5737	0.0656	C10ORF90;TMEM17;TBC1D7
GAK human kinase ARCHS4 coexpression	3/299	1	0.891907	0.994709	0.5737	0.0656	AKAP8L;RELB;NFKB2
PINK1 human kinase ARCHS4 coexpression	3/299	1	0.891907	0.994709	0.5737	0.0656	GABARAPL1;HSPB8;SYP
PXK human kinase ARCHS4 coexpression	3/299	1	0.891907	0.994709	0.5737	0.0656	CASP1;ARHGAP25;UNKL
RPS6KC1 human kinase ARCHS4 coexpression	3/299	1	0.891907	0.994709	0.5737	0.0656	HERC5;MAP2;DYNC1I1
SBK1 human kinase ARCHS4 coexpression	3/299	1	0.891907	0.994709	0.5737	0.0656	UCHL1;CENPV;MAP2
STK16 human kinase ARCHS4 coexpression	3/299	1	0.891907	0.994709	0.5737	0.0656	GADD45B;GBA;ATF4
STK35 human kinase ARCHS4 coexpression	3/299	1	0.891907	0.994709	0.5737	0.0656	SLC6A6;SLC1A5;ATF4
STK36 human kinase ARCHS4 coexpression	3/299	1	0.891907	0.994709	0.5737	0.0656	MAP2;ZNF300P1;ALDH1L2
TEX14 human kinase ARCHS4 coexpression	3/299	1	0.891907	0.994709	0.5737	0.0656	HERC5;KYNU;MEIOC
ULK2 human kinase ARCHS4 coexpression	3/299	1	0.891907	0.994709	0.5737	0.0656	MAP2;HSPA4L;MEIOC
ADCK1 human kinase ARCHS4 coexpression	3/299	1	0.891907	0.994709	0.5737	0.0656	TMOD1;NMNAT1;ENPP2
EEF2K human kinase ARCHS4 coexpression	3/299	1	0.891907	0.994709	0.5737	0.0656	RRAD;HSPB8;XIRP1
ATM human kinase ARCHS4 coexpression	3/299	1	0.891907	0.994709	0.5737	0.0656	IL7R;ARHGAP25;CTSS
PIK3CG human kinase ARCHS4 coexpression	3/299	1	0.891907	0.994709	0.5737	0.0656	NCF2;ARHGAP25;CTSS
AKT2 human kinase ARCHS4 coexpression	2/299	0.67	0.966527	0.994709	0.38	0.0129	AKAP8L;MAP3K10
GRK5 human kinase ARCHS4 coexpression	2/299	0.67	0.966527	0.994709	0.38	0.0129	C1S;HTRA3
LATS2 human kinase ARCHS4 coexpression	2/299	0.67	0.966527	0.994709	0.38	0.0129	ADM;HBEGF
MAST1 human kinase ARCHS4 coexpression	2/299	0.67	0.966527	0.994709	0.38	0.0129	MAP2;SYP
MAST4 human kinase ARCHS4 coexpression	2/299	0.67	0.966527	0.994709	0.38	0.0129	KCNE4;LIPH
PDPK2P human kinase ARCHS4 coexpression	2/299	0.67	0.966527	0.994709	0.38	0.0129	ABCB1;UNKL
PRKY human kinase ARCHS4 coexpression	2/299	0.67	0.966527	0.994709	0.38	0.0129	BCAS4;IL7R
RPS6KA6 human kinase ARCHS4 coexpression	2/299	0.67	0.966527	0.994709	0.38	0.0129	RPLP0P2;LIPH
CAMK4 human kinase ARCHS4 coexpression	2/299	0.67	0.966527	0.994709	0.38	0.0129	MAP2;SYP
DCLK3 human kinase ARCHS4 coexpression	2/299	0.67	0.966527	0.994709	0.38	0.0129	KCNE4;RADIL
KALRN human kinase ARCHS4 coexpression	2/299	0.67	0.966527	0.994709	0.38	0.0129	MAP2;SYP
MKNK2 human kinase ARCHS4 coexpression	2/299	0.67	0.966527	0.994709	0.38	0.0129	SYNGR2;NFKB2
SIK3 human kinase ARCHS4 coexpression	2/299	0.67	0.966527	0.994709	0.38	0.0129	VAMP1;MAP3K10
CSNK1A1L human kinase ARCHS4 coexpression	2/299	0.67	0.966527	0.994709	0.38	0.0129	IL32;FTLP3
CSNK1E human kinase ARCHS4 coexpression	2/299	0.67	0.966527	0.994709	0.38	0.0129	TMEM132A;ATF4
CSNK1G3 human kinase ARCHS4 coexpression	2/299	0.67	0.966527	0.994709	0.38	0.0129	MLLT11;IFRD1
TTBK1 human kinase ARCHS4 coexpression	2/299	0.67	0.966527	0.994709	0.38	0.0129	MAP3K10;SYP
VRK3 human kinase ARCHS4 coexpression	2/299	0.67	0.966527	0.994709	0.38	0.0129	LIPH;MEIOC
CDK10 human kinase ARCHS4 coexpression	2/299	0.67	0.966527	0.994709	0.38	0.0129	NMNAT1;SPAG4
CDK11B human kinase ARCHS4 coexpression	2/299	0.67	0.966527	0.994709	0.38	0.0129	AKAP8L;NFKB2
CDK14 human kinase ARCHS4 coexpression	2/299	0.67	0.966527	0.994709	0.38	0.0129	MAP2;SYP
CDK16 human kinase ARCHS4 coexpression	2/299	0.67	0.966527	0.994709	0.38	0.0129	SLC1A5;ATF4
CDK17 human kinase ARCHS4 coexpression	2/299	0.67	0.966527	0.994709	0.38	0.0129	PRNP;MAP2
CDK18 human kinase ARCHS4 coexpression	2/299	0.67	0.966527	0.994709	0.38	0.0129	MAP3K10;SYP
CDK2 human kinase ARCHS4 coexpression	2/299	0.67	0.966527	0.994709	0.38	0.0129	NQO1;SLC1A5
CDK4 human kinase ARCHS4 coexpression	2/299	0.67	0.966527	0.994709	0.38	0.0129	ADRM1;SLC1A5
CDKL1 human kinase ARCHS4 coexpression	2/299	0.67	0.966527	0.994709	0.38	0.0129	KCNE4;LIPH
CLK4 human kinase ARCHS4 coexpression	2/299	0.67	0.966527	0.994709	0.38	0.0129	KCNE4;TMEM182
DYRK4 human kinase ARCHS4 coexpression	2/299	0.67	0.966527	0.994709	0.38	0.0129	MEIOC;C2ORF16
GSK3A human kinase ARCHS4 coexpression	2/299	0.67	0.966527	0.994709	0.38	0.0129	AKAP8L;MAP3K10
HIPK3 human kinase ARCHS4 coexpression	2/299	0.67	0.966527	0.994709	0.38	0.0129	HSPB8;FSIP1
MAPK4 human kinase ARCHS4 coexpression	2/299	0.67	0.966527	0.994709	0.38	0.0129	MAP3K10;SYP
NLK human kinase ARCHS4 coexpression	2/299	0.67	0.966527	0.994709	0.38	0.0129	GABARAPL1;SYP
NEK3 human kinase ARCHS4 coexpression	2/299	0.67	0.966527	0.994709	0.38	0.0129	ANGPT1;ENKUR
NEK4 human kinase ARCHS4 coexpression	2/299	0.67	0.966527	0.994709	0.38	0.0129	PSAT1;ENKUR
NEK7 human kinase ARCHS4 coexpression	2/299	0.67	0.966527	0.994709	0.38	0.0129	ANKRD1;ALDH1L2
MAP2K1 human kinase ARCHS4 coexpression	2/299	0.67	0.966527	0.994709	0.38	0.0129	GABARAPL1;NFKB2
MAP3K10 human kinase ARCHS4 coexpression	2/299	0.67	0.966527	0.994709	0.38	0.0129	GOLGA7B;SYP
MAP4K2 human kinase ARCHS4 coexpression	2/299	0.67	0.966527	0.994709	0.38	0.0129	ARHGAP25;LIMD2
OXSR1 human kinase ARCHS4 coexpression	2/299	0.67	0.966527	0.994709	0.38	0.0129	SLC6A6;PPIF
PAK6 human kinase ARCHS4 coexpression	2/299	0.67	0.966527	0.994709	0.38	0.0129	SYP;DYNC1I1
TAOK3 human kinase ARCHS4 coexpression	2/299	0.67	0.966527	0.994709	0.38	0.0129	PHLDB3;ATF3
TNIK human kinase ARCHS4 coexpression	2/299	0.67	0.966527	0.994709	0.38	0.0129	HEY1;MAP2
ACVR2A human kinase ARCHS4 coexpression	2/299	0.67	0.966527	0.994709	0.38	0.0129	MLLT11;MAP2
BMPR1A human kinase ARCHS4 coexpression	2/299	0.67	0.966527	0.994709	0.38	0.0129	KCNE4;TMEM182
BMPR1B human kinase ARCHS4 coexpression	2/299	0.67	0.966527	0.994709	0.38	0.0129	LIPH;TBC1D7
BMPR2 human kinase ARCHS4 coexpression	2/299	0.67	0.966527	0.994709	0.38	0.0129	MAP2;TMTC1
LRRK1 human kinase ARCHS4 coexpression	2/299	0.67	0.966527	0.994709	0.38	0.0129	GCNT2;TMEM182
DDR1 human kinase ARCHS4 coexpression	2/299	0.67	0.966527	0.994709	0.38	0.0129	TMEM132A;HSPB1
EPHA4 human kinase ARCHS4 coexpression	2/299	0.67	0.966527	0.994709	0.38	0.0129	MAP2;SYP
EPHA6 human kinase ARCHS4 coexpression	2/299	0.67	0.966527	0.994709	0.38	0.0129	MAP2;C2ORF16
EPHB3 human kinase ARCHS4 coexpression	2/299	0.67	0.966527	0.994709	0.38	0.0129	TMEM132A;FBXL22
INSRR human kinase ARCHS4 coexpression	2/299	0.67	0.966527	0.994709	0.38	0.0129	ZFYVE27;NMNAT1
LMTK2 human kinase ARCHS4 coexpression	2/299	0.67	0.966527	0.994709	0.38	0.0129	GABARAPL1;SYP
MST1R human kinase ARCHS4 coexpression	2/299	0.67	0.966527	0.994709	0.38	0.0129	ACSL5;GCNT3
NTRK1 human kinase ARCHS4 coexpression	2/299	0.67	0.966527	0.994709	0.38	0.0129	MLLT11;HMOX1
NTRK2 human kinase ARCHS4 coexpression	2/299	0.67	0.966527	0.994709	0.38	0.0129	HEY1;MAP2
NTRK3 human kinase ARCHS4 coexpression	2/299	0.67	0.966527	0.994709	0.38	0.0129	MAP2;DYNC1I1
PTK2 human kinase ARCHS4 coexpression	2/299	0.67	0.966527	0.994709	0.38	0.0129	LIMCH1;HSPA4L
ROR1 human kinase ARCHS4 coexpression	2/299	0.67	0.966527	0.994709	0.38	0.0129	PSAT1;PRDX1
ROR2 human kinase ARCHS4 coexpression	2/299	0.67	0.966527	0.994709	0.38	0.0129	ZNF300P1;BCL2L2-PABPN1
CSNK2A1 human kinase ARCHS4 coexpression	2/299	0.67	0.966527	0.994709	0.38	0.0129	PSAT1;PRDX1
EIF2AK1 human kinase ARCHS4 coexpression	2/299	0.67	0.966527	0.994709	0.38	0.0129	AKAP8L;SLC1A5
ERN2 human kinase ARCHS4 coexpression	2/299	0.67	0.966527	0.994709	0.38	0.0129	LIPH;GCNT3
GSG2 human kinase ARCHS4 coexpression	2/299	0.67	0.966527	0.994709	0.38	0.0129	SLC1A5;ATF4
IKBKB human kinase ARCHS4 coexpression	2/299	0.67	0.966527	0.994709	0.38	0.0129	TPRA1;IL7R
MOS human kinase ARCHS4 coexpression	2/299	0.67	0.966527	0.994709	0.38	0.0129	RADIL;UNKL
NRBP2 human kinase ARCHS4 coexpression	2/299	0.67	0.966527	0.994709	0.38	0.0129	TMEM132A;SYP
PKMYT1 human kinase ARCHS4 coexpression	2/299	0.67	0.966527	0.994709	0.38	0.0129	ADRM1;SLC1A5
PLK1 human kinase ARCHS4 coexpression	2/299	0.67	0.966527	0.994709	0.38	0.0129	ADRM1;SLC1A5
POMK human kinase ARCHS4 coexpression	2/299	0.67	0.966527	0.994709	0.38	0.0129	MLLT11;ZMAT5
RPS6KL1 human kinase ARCHS4 coexpression	2/299	0.67	0.966527	0.994709	0.38	0.0129	KYNU;TMEM182
TLK2 human kinase ARCHS4 coexpression	2/299	0.67	0.966527	0.994709	0.38	0.0129	HERC5;TSPYL2
UHMK1 human kinase ARCHS4 coexpression	2/299	0.67	0.966527	0.994709	0.38	0.0129	TXNRD1;GSR
ULK3 human kinase ARCHS4 coexpression	2/299	0.67	0.966527	0.994709	0.38	0.0129	AKAP8L;LIMD2
WEE2 human kinase ARCHS4 coexpression	2/299	0.67	0.966527	0.994709	0.38	0.0129	RADIL;UNKL
WNK2 human kinase ARCHS4 coexpression	2/299	0.67	0.966527	0.994709	0.38	0.0129	MAP3K10;SYP
WNK3 human kinase ARCHS4 coexpression	2/299	0.67	0.966527	0.994709	0.38	0.0129	MLLT11;MAP2
WNK4 human kinase ARCHS4 coexpression	2/299	0.67	0.966527	0.994709	0.38	0.0129	COL27A1;OAZ3
TRPM6 human kinase ARCHS4 coexpression	2/299	0.67	0.966527	0.994709	0.38	0.0129	ACSL5;GCNT3
ATR human kinase ARCHS4 coexpression	2/299	0.67	0.966527	0.994709	0.38	0.0129	LIMCH1;DTX2
RIOK3 human kinase ARCHS4 coexpression	2/299	0.67	0.966527	0.994709	0.38	0.0129	ST6GALNAC4;CTSS
AKT1 human kinase ARCHS4 coexpression	1/299	0.33	0.994709	0.994709	0.1888	0.001	HSPB1
AKT3 human kinase ARCHS4 coexpression	1/299	0.33	0.994709	0.994709	0.1888	0.001	MAP2
CDC42BPB human kinase ARCHS4 coexpression	1/299	0.33	0.994709	0.994709	0.1888	0.001	TMEM132A
CDC42BPG human kinase ARCHS4 coexpression	1/299	0.33	0.994709	0.994709	0.1888	0.001	HSPB1
CIT human kinase ARCHS4 coexpression	1/299	0.33	0.994709	0.994709	0.1888	0.001	SYP
GRK7 human kinase ARCHS4 coexpression	1/299	0.33	0.994709	0.994709	0.1888	0.001	CD34
LATS1 human kinase ARCHS4 coexpression	1/299	0.33	0.994709	0.994709	0.1888	0.001	IFRD1
PKN1 human kinase ARCHS4 coexpression	1/299	0.33	0.994709	0.994709	0.1888	0.001	AKAP8L
PKN3 human kinase ARCHS4 coexpression	1/299	0.33	0.994709	0.994709	0.1888	0.001	SLC1A5
PRKACA human kinase ARCHS4 coexpression	1/299	0.33	0.994709	0.994709	0.1888	0.001	HSPB8
PRKCI human kinase ARCHS4 coexpression	1/299	0.33	0.994709	0.994709	0.1888	0.001	PRDX1
RPS6KA2 human kinase ARCHS4 coexpression	1/299	0.33	0.994709	0.994709	0.1888	0.001	TMTC1
CASK human kinase ARCHS4 coexpression	1/299	0.33	0.994709	0.994709	0.1888	0.001	MAP2
MARK2 human kinase ARCHS4 coexpression	1/299	0.33	0.994709	0.994709	0.1888	0.001	NCF2
MARK3 human kinase ARCHS4 coexpression	1/299	0.33	0.994709	0.994709	0.1888	0.001	AKAP8L
MELK human kinase ARCHS4 coexpression	1/299	0.33	0.994709	0.994709	0.1888	0.001	PRDX1
PRKD1 human kinase ARCHS4 coexpression	1/299	0.33	0.994709	0.994709	0.1888	0.001	LIMCH1
PSKH1 human kinase ARCHS4 coexpression	1/299	0.33	0.994709	0.994709	0.1888	0.001	POR
PSKH2 human kinase ARCHS4 coexpression	1/299	0.33	0.994709	0.994709	0.1888	0.001	MYCT1
STK11 human kinase ARCHS4 coexpression	1/299	0.33	0.994709	0.994709	0.1888	0.001	AKAP8L
TSSK1B human kinase ARCHS4 coexpression	1/299	0.33	0.994709	0.994709	0.1888	0.001	MEIOC
TSSK4 human kinase ARCHS4 coexpression	1/299	0.33	0.994709	0.994709	0.1888	0.001	NFKBIZ
CSNK1D human kinase ARCHS4 coexpression	1/299	0.33	0.994709	0.994709	0.1888	0.001	AKAP8L
CSNK1G1 human kinase ARCHS4 coexpression	1/299	0.33	0.994709	0.994709	0.1888	0.001	HSPA4L
CSNK1G2 human kinase ARCHS4 coexpression	1/299	0.33	0.994709	0.994709	0.1888	0.001	AKAP8L
CDK15 human kinase ARCHS4 coexpression	1/299	0.33	0.994709	0.994709	0.1888	0.001	HMOX1
CDK19 human kinase ARCHS4 coexpression	1/299	0.33	0.994709	0.994709	0.1888	0.001	SEL1L3
CDK3 human kinase ARCHS4 coexpression	1/299	0.33	0.994709	0.994709	0.1888	0.001	ABCB1
CDK7 human kinase ARCHS4 coexpression	1/299	0.33	0.994709	0.994709	0.1888	0.001	PRDX1
CDK8 human kinase ARCHS4 coexpression	1/299	0.33	0.994709	0.994709	0.1888	0.001	TUBA4A
CDKL4 human kinase ARCHS4 coexpression	1/299	0.33	0.994709	0.994709	0.1888	0.001	PTPRR
CLK2 human kinase ARCHS4 coexpression	1/299	0.33	0.994709	0.994709	0.1888	0.001	AKAP8L
CLK3 human kinase ARCHS4 coexpression	1/299	0.33	0.994709	0.994709	0.1888	0.001	MEIOC
GSK3B human kinase ARCHS4 coexpression	1/299	0.33	0.994709	0.994709	0.1888	0.001	MAP2
HIPK1 human kinase ARCHS4 coexpression	1/299	0.33	0.994709	0.994709	0.1888	0.001	SLC6A6
MAK human kinase ARCHS4 coexpression	1/299	0.33	0.994709	0.994709	0.1888	0.001	MEIOC
MAPK1 human kinase ARCHS4 coexpression	1/299	0.33	0.994709	0.994709	0.1888	0.001	SLC6A6
MAP3K12 human kinase ARCHS4 coexpression	1/299	0.33	0.994709	0.994709	0.1888	0.001	SYP
MAP3K15 human kinase ARCHS4 coexpression	1/299	0.33	0.994709	0.994709	0.1888	0.001	ATP6V0D2
MAP4K4 human kinase ARCHS4 coexpression	1/299	0.33	0.994709	0.994709	0.1888	0.001	COL27A1
STK24 human kinase ARCHS4 coexpression	1/299	0.33	0.994709	0.994709	0.1888	0.001	SEL1L3
STK26 human kinase ARCHS4 coexpression	1/299	0.33	0.994709	0.994709	0.1888	0.001	PSAT1
STK39 human kinase ARCHS4 coexpression	1/299	0.33	0.994709	0.994709	0.1888	0.001	PRNP
TAOK2 human kinase ARCHS4 coexpression	1/299	0.33	0.994709	0.994709	0.1888	0.001	AKAP8L
ACVR1B human kinase ARCHS4 coexpression	1/299	0.33	0.994709	0.994709	0.1888	0.001	TMEM132A
ANKK1 human kinase ARCHS4 coexpression	1/299	0.33	0.994709	0.994709	0.1888	0.001	IQCG
BRAF human kinase ARCHS4 coexpression	1/299	0.33	0.994709	0.994709	0.1888	0.001	MAP2
KSR2 human kinase ARCHS4 coexpression	1/299	0.33	0.994709	0.994709	0.1888	0.001	SYP
TESK1 human kinase ARCHS4 coexpression	1/299	0.33	0.994709	0.994709	0.1888	0.001	TOM1
TGFBR1 human kinase ARCHS4 coexpression	1/299	0.33	0.994709	0.994709	0.1888	0.001	HSCB
ABL1 human kinase ARCHS4 coexpression	1/299	0.33	0.994709	0.994709	0.1888	0.001	SLC1A5
LTK human kinase ARCHS4 coexpression	1/299	0.33	0.994709	0.994709	0.1888	0.001	LIMD2
SRMS human kinase ARCHS4 coexpression	1/299	0.33	0.994709	0.994709	0.1888	0.001	SYNGR2
TNK2 human kinase ARCHS4 coexpression	1/299	0.33	0.994709	0.994709	0.1888	0.001	MAP3K10
TYRO3 human kinase ARCHS4 coexpression	1/299	0.33	0.994709	0.994709	0.1888	0.001	SYP
AURKA human kinase ARCHS4 coexpression	1/299	0.33	0.994709	0.994709	0.1888	0.001	UNKL
AURKB human kinase ARCHS4 coexpression	1/299	0.33	0.994709	0.994709	0.1888	0.001	PRDX1
CDC7 human kinase ARCHS4 coexpression	1/299	0.33	0.994709	0.994709	0.1888	0.001	PSAT1
CSNK2A2 human kinase ARCHS4 coexpression	1/299	0.33	0.994709	0.994709	0.1888	0.001	PSAT1
EIF2AK4 human kinase ARCHS4 coexpression	1/299	0.33	0.994709	0.994709	0.1888	0.001	TMEM132A
NRBP1 human kinase ARCHS4 coexpression	1/299	0.33	0.994709	0.994709	0.1888	0.001	C2ORF16
PKDCC human kinase ARCHS4 coexpression	1/299	0.33	0.994709	0.994709	0.1888	0.001	PCOLCE2
SCYL1 human kinase ARCHS4 coexpression	1/299	0.33	0.994709	0.994709	0.1888	0.001	ADRM1
SCYL2 human kinase ARCHS4 coexpression	1/299	0.33	0.994709	0.994709	0.1888	0.001	EGR1
SCYL3 human kinase ARCHS4 coexpression	1/299	0.33	0.994709	0.994709	0.1888	0.001	LIPH
SGK494 human kinase ARCHS4 coexpression	1/299	0.33	0.994709	0.994709	0.1888	0.001	LIPH
STK32B human kinase ARCHS4 coexpression	1/299	0.33	0.994709	0.994709	0.1888	0.001	CD34
STKLD1 human kinase ARCHS4 coexpression	1/299	0.33	0.994709	0.994709	0.1888	0.001	PLA2G4C
ULK1 human kinase ARCHS4 coexpression	1/299	0.33	0.994709	0.994709	0.1888	0.001	AKAP8L
ULK4 human kinase ARCHS4 coexpression	1/299	0.33	0.994709	0.994709	0.1888	0.001	MEIOC
ADCK5 human kinase ARCHS4 coexpression	1/299	0.33	0.994709	0.994709	0.1888	0.001	TPRA1
TRPM7 human kinase ARCHS4 coexpression	1/299	0.33	0.994709	0.994709	0.1888	0.001	KYNU
PDK3 human kinase ARCHS4 coexpression	1/299	0.33	0.994709	0.994709	0.1888	0.001	PRNP
MTOR human kinase ARCHS4 coexpression	1/299	0.33	0.994709	0.994709	0.1888	0.001	SLC1A5
PIK3CA human kinase ARCHS4 coexpression	1/299	0.33	0.994709	0.994709	0.1888	0.001	NFKBIZ
PRKDC human kinase ARCHS4 coexpression	1/299	0.33	0.994709	0.994709	0.1888	0.001	SLC1A5
SMG1 human kinase ARCHS4 coexpression	1/299	0.33	0.994709	0.994709	0.1888	0.001	KYNU

## Sheet: BioPlanet_UP
BioPlanet 2019 | Upregulated DEGs | Sorted by Adjusted P-value | Bold = shown in figure
Top 20 sig. → orange | Other sig. → yellow | Bold = in figure (0) | Significant (adj.p<0.05): 89/595
Term	Overlap	Overlap (%)	P-value	Adjusted P-value	Odds Ratio	Combined Score	Genes
Interleukin-1 regulation of extracellular matrix	25/120	20.83	3.2987e-20	1.96273e-17	16.0855	721.567	CSF3;CSF2;CXCL8;TNFAIP6;RRAD;CXCL1;CXCL3;CXCL2;CXCL5;ICAM1;C3;SPP1;SERPINB2;MMP1;CCL20;TXNRD1;MMP3;SOD2;MMP10;NFKBIA;IL6;IL1B;NFKBIE;BIRC3;HBEGF
TNF-alpha effects on cytokine activity, cell motility, and apoptosis	22/135	16.3	1.5207e-15	4.52408e-13	11.7791	401.897	CSF3;TGFB2;CSF2;CXCL8;ANGPT1;TFPI2;CXCL1;TRAF1;CXCL3;SOD2;CXCL2;ICAM1;NFKB2;RELB;NFKBIA;IL6;IL1B;TNFSF8;IL7R;NFKBIE;BIRC3;HBEGF
Interleukin-5 regulation of apoptosis	20/144	13.89	6.83834e-13	1.35627e-10	9.6928	271.506	EGR1;CXCL8;HSPA6;TFPI2;CXCL1;TRAF1;SOD2;CXCL2;ICAM1;NFKB2;RELB;C3;IL6;HEY1;IL1B;NFKBIE;ATF4;NFKBIB;BIRC3;HBEGF
Oncostatin M	27/311	8.68	6.23162e-12	9.26953e-10	5.7912	149.422	CSF3;CSF2;CXCL8;C1S;RRAD;SERPINE1;CXCL1;CXCL3;CXCL2;CXCL5;ICAM1;HMOX1;TIMP1;JUNB;SERPINB2;ABCC2;CCL20;MMP1;AKR1C1;MMP3;AKR1C3;ACSL5;SOD2;PGF;MLLT11;IL6;ATF3
Thymic stromal lymphopoietin (TSLP) pathway	14/90	15.56	4.39834e-10	5.23402e-08	10.8962	234.756	CXCL8;CD82;CCL20;TNFRSF9;CXCL1;CXCL3;CLDN1;CXCL2;CXCL5;ICAM1;IL6;KYNU;IL1B;IL7R
TGF-beta regulation of extracellular matrix	30/565	5.31	5.55479e-08	5.5085e-06	3.4036	56.8614	PTPRR;TNFAIP6;C1S;SERPINE1;CXCL1;SLC7A11;CLDN1;SAT1;UCHL1;CASP1;NRCAM;JUNB;CD34;GSTM3;TGFB2;ANGPT1;AKR1C1;TXNRD1;TFPI2;PLA2G4C;AKR1C3;ASNS;IL6;BAMBI;IL1B;CTH;DDIT4;PIR;TRIB3;ATF3
Selenium pathway	10/60	16.67	7.18342e-08	6.1059e-06	11.7045	192.526	IL6;KYNU;IL1B;PRDX1;CTH;SERPINE1;GSR;SOD2;ICAM1;NFKB2
Cytokines and inflammatory response	8/35	22.86	1.13347e-07	8.43015e-06	17.2573	275.993	CSF3;TGFB2;IL6;CSF2;CXCL8;IL1B;CXCL1;CXCL2
T cell receptor regulation of apoptosis	30/603	4.98	2.2748e-07	1.50389e-05	3.1716	48.5136	CSF3;ABCB1;CSF2;CXCL8;SLC3A2;CXCL5;RELB;PRDX1;CASP1;JUNB;EGR1;NQO1;TGFB2;GADD45B;CCL20;TNFRSF9;TFPI2;TRAF1;SOD2;NFKBIA;IL6;DDIT3;IL1B;CTH;IL7R;NFKBIE;MAP3K14;ATF3;ATF4;BIRC3
BDNF signaling pathway	18/261	6.9	7.14228e-07	4.24965e-05	4.3973	62.2313	TMOD1;EGR1;NQO1;ABCB1;AKR1C1;SERPINE1;TFPI2;AKR1C3;HSPB1;ADM;IL6;DDIT3;SPP1;TIMP1;PRSS3;JUNB;ATF3;HSPA1B
RAGE pathway	9/60	15	8.30421e-07	4.49183e-05	10.2962	144.161	IL6;CXCL8;MMP1;IL1B;SERPINE1;ICAM2;ID3;TIMP1;ICAM1
NOD signaling pathway	10/85	11.76	2.03577e-06	0.00010094	7.793	102.125	NFKBIA;IL6;CXCL8;IRAK2;IL1B;CASP1;CXCL1;CXCL2;BIRC3;NFKBIB
TWEAK regulation of gene expression	6/27	22.22	5.49792e-06	0.000251636	16.5478	200.413	IL6;CXCL8;MMP1;SERPINE1;SPP1;ICAM1
TNF-alpha signaling pathway	10/101	9.9	9.79652e-06	0.000416352	6.4176	74.0171	NFKBIA;IL6;TRAF1;NFKBIE;BID;SQSTM1;MAP3K14;NFKB2;NFKBIB;BIRC3
Cytokine-cytokine receptor interaction	16/265	6.04	1.59703e-05	0.000633488	3.7902	41.8618	CSF3;TGFB2;CSF2;CXCL8;CCL20;TNFRSF9;IL20RB;CXCL1;CXCL3;CXCL2;CXCL5;IL6;IL1B;TNFSF8;IL7R;CCL26
Interleukin-4 regulation of apoptosis	16/267	5.99	1.75228e-05	0.000651629	3.7596	41.1752	TMOD1;CXCL8;GADD45B;CCL20;HSPB8;MMP3;ARHGAP25;CXCL2;IL6;DDIT4;SPP1;ID3;IL13RA2;IL7R;MAP3K14;CCL26
Epithelial cell signaling in Helicobacter pylori infection	8/68	11.76	2.17056e-05	0.000759696	7.7527	83.2482	NFKBIA;ATP6V0B;CXCL8;CXCL1;ATP6V0A4;ATP6V0D2;MAP3K14;HBEGF
AP-1 transcription factor network	8/70	11.43	2.69038e-05	0.00088932	7.5019	78.944	EGR1;IL6;CSF2;CXCL8;MMP1;TIMP1;JUNB;ATF3
Epstein-Barr virus LMP1 signaling	5/22	22.73	3.06876e-05	0.000912957	16.9879	176.532	CXCL8;CCL20;TRAF1;MAP3K14;NFKB2
Vitamin B12 metabolism	7/52	13.46	2.93642e-05	0.000912957	9.025	94.1823	IL6;IL1B;CTH;SERPINE1;SOD2;ICAM1;NFKB2
FRA pathway	6/37	16.22	3.73382e-05	0.00105792	11.2041	114.231	IL6;CXCL8;MMP1;HMOX1;JUNB;ATF4
Signal transduction through IL-1R	6/38	15.79	4.37004e-05	0.0011819	10.8534	108.948	NFKBIA;TGFB2;IL6;IRAK2;IL1B;MAP3K14
Interleukin-1 signaling pathway	10/125	8	6.2807e-05	0.00162479	5.072	49.0742	NFKBIA;IL6;CXCL8;IRAK2;IL1B;CASP1;HSPB1;SQSTM1;MAP3K14;NFKBIB
Alternative NF-kappaB pathway	3/6	50	9.79158e-05	0.00184096	57.462	530.455	MAP3K14;NFKB2;RELB
Adhesion and diapedesis of lymphocytes	4/14	28.57	7.59646e-05	0.00184096	23.044	218.578	CXCL8;ICAM2;CD34;ICAM1
Adhesion and diapedesis of granulocytes	4/15	26.67	0.000102183	0.00184096	20.948	192.486	CSF3;CXCL8;ICAM2;ICAM1
Erythrocyte differentiation pathway	4/15	26.67	0.000102183	0.00184096	20.948	192.486	CSF3;TGFB2;IL6;CSF2
Hematopoiesis regulation by cytokines	4/15	26.67	0.000102183	0.00184096	20.948	192.486	CSF3;IL6;CSF2;CXCL8
Interleukin-17 signaling pathway	4/15	26.67	0.000102183	0.00184096	20.948	192.486	CSF3;IL6;CXCL8;CD34
Oxidative stress	5/27	18.52	8.76437e-05	0.00184096	13.1237	122.604	NQO1;GSR;HMOX1;SOD2;JUNB
PERK-regulated gene expression	5/28	17.86	0.000105198	0.00184096	12.5524	114.976	CXCL8;DDIT3;ASNS;ATF3;ATF4
TWEAK signaling pathway	6/42	14.29	7.83591e-05	0.00184096	9.6455	91.1908	NFKBIA;IL6;TRAF1;RELB;NFKB2;NFKBIB
Folate metabolism	7/63	11.11	0.000103256	0.00184096	7.2482	66.5257	IL6;IL1B;CTH;SERPINE1;SOD2;ICAM1;NFKB2
Amoebiasis	9/105	8.57	8.55585e-05	0.00184096	5.4573	51.1149	TGFB2;IL6;GNA15;CSF2;CXCL8;SERPINB2;IL1B;HSPB1;CXCL1
Interleukin-1 processing	3/7	42.86	0.000169161	0.00280322	43.0943	374.259	IL1B;CASP1;NFKB2
Cells and molecules involved in local acute inflammatory response	4/17	23.53	0.000173367	0.00280322	17.7234	153.487	C3;IL6;CXCL8;ICAM1
NF-kappaB activation by non-typeable Hemophilus influenzae	5/31	16.13	0.000174318	0.00280322	11.1024	96.087	NFKBIA;TGFB2;CXCL8;IL1B;MAP3K14
Malaria	6/51	11.76	0.000236163	0.00369782	7.7129	64.4102	CSF3;TGFB2;IL6;CXCL8;IL1B;ICAM1
Interleukin-7 interactions in immune response	5/34	14.71	0.000273632	0.00417464	9.9523	81.6462	CXCL8;CXCL1;CXCL3;CXCL2;CXCL5
RANKL signaling pathway	6/54	11.11	0.000324316	0.00459447	7.2297	58.0821	NFKBIA;TRAF1;SQSTM1;ICAM1;RELB;NFKB2
Binding of chemokines to chemokine receptors	6/54	11.11	0.000324316	0.00459447	7.2297	58.0821	CXCL8;CCL20;CXCL1;CXCL3;CXCL2;CXCL5
Senescence and autophagy	8/99	8.08	0.000316674	0.00459447	5.1036	41.1229	GABARAPL1;IL6;CXCL8;SERPINB2;IL1B;SERPINE1;CXCL1;SQSTM1
Hypertrophy pathway	4/20	20	0.000338788	0.00468787	14.3981	115.043	IFRD1;ANKRD1;ATF3;HBEGF
MAPK signaling pathway	15/314	4.78	0.000391376	0.00529247	2.9425	23.0867	PTPRR;TGFB2;GADD45B;HSPA6;HSPB1;RELB;NFKB2;MAP2;DDIT3;IL1B;CASP1;MAP3K10;MAP3K14;HSPA1B;ATF4
Chagas disease	8/104	7.69	0.000442336	0.00584867	4.8365	37.3548	C3;NFKBIA;TGFB2;IL6;GNA15;CXCL8;IL1B;SERPINE1
Iron uptake and transport	5/39	12.82	0.000527653	0.00665295	8.4866	64.0489	ATP6V0B;HMOX1;ATP6V0A4;ATP6V0D2;FTL
ATF2 transcription factor network	6/59	10.17	0.000526416	0.00665295	6.546	49.4185	TGFB2;IL6;CXCL8;DDIT3;JUNB;ATF3
Regular glucocorticoid receptor pathway	7/82	8.54	0.000536708	0.00665295	5.4067	40.7128	EGR1;IL6;CSF2;CXCL8;MMP1;AFP;ICAM1
Signaling by interleukins	8/109	7.34	0.000605761	0.00735567	4.5959	34.0514	IL6;CSF2;IRAK2;IL1B;CASP1;IL7R;SQSTM1;NFKB2
Leptin influence on immune response	8/110	7.27	0.000643655	0.00765949	4.5506	33.4398	IL6;NCF2;IL1B;CXCL1;TIMP1;IL7R;CTSS;CCL26
TAK1 activates NF-kappaB by phosphorylation and activation of IKK complex	4/24	16.67	0.000703678	0.0080517	11.5161	83.5978	NFKBIA;IRAK2;NFKB2;NFKBIB
p53 signaling pathway	9/139	6.47	0.000700316	0.0080517	4.023	29.223	CD82;SERPINE1;DDIT4;CASP1;SPP1;AFP;BID;ATF3;HSPA1B
Gastrin pathway	5/44	11.36	0.000927667	0.0104144	7.3967	51.6498	CXCL8;SERPINB2;SERPINE1;BIRC3;HBEGF
Regulation of NFAT transcription factors	5/47	10.64	0.00125623	0.0138418	6.8673	45.8711	EGR1;CSF2;CXCL8;SLC3A2;JUNB
Keap1-Nrf2 pathway	3/13	23.08	0.00127982	0.0138453	17.2325	114.786	NQO1;HMOX1;GCLM
EGFR1 pathway	9/152	5.92	0.00131934	0.014018	3.6548	24.2339	TGFB2;MAP2;MMP1;SPP1;ID3;HSPB1;SQSTM1;EREG;HBEGF
Matrix metalloproteinases	4/29	13.79	0.00146969	0.015077	9.2106	60.0777	MMP1;MMP3;TIMP1;MMP10
TSH regulation of gene expression	7/97	7.22	0.00145625	0.015077	4.5021	29.4075	EGR1;CXCL8;GADD45B;ADM;NFKBIE;PGF;ICAM1
Leishmaniasis	6/72	8.33	0.00151403	0.0152686	5.2532	34.1086	C3;NFKBIA;TGFB2;NCF2;IL1B;NFKBIB
Activation of matrix metalloproteinases	4/30	13.33	0.00167298	0.0165904	8.8559	56.6168	MMP1;MMP3;TIMP1;MMP10
Amino acid transport across the plasma membrane	4/31	12.9	0.00189501	0.018186	8.5274	53.4544	SLC6A6;SLC3A2;SLC1A5;SLC7A11
CD40/CD40L signaling	4/31	12.9	0.00189501	0.018186	8.5274	53.4544	NFKBIA;TRAF1;MAP3K14;BIRC3
Amino acid biosynthesis and interconversion (transamination)	3/16	18.75	0.00241161	0.0226506	13.2537	79.8862	PSAT1;ASNS;PSPH
Unfolded protein response	6/79	7.59	0.00243637	0.0226506	4.7477	28.5682	TSPYL2;CXCL8;DDIT3;ASNS;ATF3;ATF4
Induction of apoptosis through DR3 and DR4/5 death receptors	4/34	11.76	0.00268202	0.0245508	7.6735	45.4363	NFKBIA;BID;MAP3K14;BIRC3
Cytosolic DNA-sensing pathway	5/56	8.93	0.00275772	0.0248612	5.6528	33.3141	NFKBIA;IL6;IL1B;CASP1;NFKBIB
Prion diseases	4/35	11.43	0.00298748	0.0265306	7.4256	43.1674	EGR1;PRNP;IL6;IL1B
HIV-1 Nef as negative effector of Fas and TNF	5/58	8.62	0.00321689	0.0281478	5.439	31.216	NFKBIA;TRAF1;BID;MAP3K14;BIRC3
Toll-like receptor signaling pathway regulation	8/142	5.63	0.00328399	0.0283185	3.4583	19.7767	NFKBIA;IL6;CXCL8;IRAK2;IL1B;SPP1;SQSTM1;NFKB2
TNFR2 signaling pathway	3/18	16.67	0.00342551	0.0287068	11.4854	65.1968	NFKBIA;TRAF1;MAP3K14
Nucleotide di- and triphosphate biosynthesis and interconversion	3/18	16.67	0.00342551	0.0287068	11.4854	65.1968	TXNRD1;GSR;GLRX
Interleukin-23-mediated signaling events	4/37	10.81	0.00366798	0.0294926	6.9749	39.1158	NFKBIA;IL6;IL1B;CXCL1
Latent infection of Homo sapiens with Mycobacterium tuberculosis	4/37	10.81	0.00366798	0.0294926	6.9749	39.1158	ATP6V0B;NCF2;ATP6V0A4;ATP6V0D2
Immune system signaling by interferons, interleukins, prolactin, and growth hormones	12/280	4.29	0.00357446	0.0294926	2.6068	14.6867	HERC5;EGR1;IL6;CSF2;IRAK2;IL1B;CASP1;IL7R;SQSTM1;ICAM1;NFKB2;OASL
Fas signaling pathway	7/115	6.09	0.00382144	0.0303168	3.7483	20.8674	CXCL8;MAP3K10;HSPB1;BID;MAP3K14;NFKB2;BIRC3
Interleukin-1-beta (IL-1b) processing pathway	2/6	33.33	0.00425097	0.0324273	28.6458	156.423	IL1B;CASP1
NF-kappaB activation	2/6	33.33	0.00425097	0.0324273	28.6458	156.423	NFKBIA;SQSTM1
Hematopoietic cell lineage	6/88	6.82	0.00417652	0.0324273	4.2247	23.144	CSF3;IL6;CSF2;IL1B;IL7R;CD34
ID regulation of gene expression	3/20	15	0.00466526	0.0351371	10.1331	54.3907	CXCL8;CXCL1;ICAM1
Lysosome	7/121	5.79	0.00504781	0.0375431	3.55	18.775	ATP6V0B;GBA;ATP6V0A4;CTSW;ATP6V0D2;GLA;CTSS
Cytosolic sensors of pathogen-associated DNA	3/21	14.29	0.00537399	0.0385244	9.5697	50.0129	NFKBIA;NFKB2;NFKBIB
LPA receptor mediated events	5/65	7.69	0.00525954	0.0385244	4.8027	25.2032	NFKBIA;GNA15;IL6;CXCL8;HBEGF
Phagosome	8/154	5.19	0.00535224	0.0385244	3.1721	16.5907	C3;ATP6V0B;NCF2;ATP6V0A4;ATP6V0D2;TUBA4A;CTSS;DYNC1I1
Extracellular matrix organization	6/93	6.45	0.00547009	0.0387465	3.9809	20.7342	COL27A1;PCOLCE2;MMP1;MMP3;TIMP1;MMP10
Chemokine signaling pathway	9/189	4.76	0.00567076	0.0396953	2.8981	14.99	NFKBIA;CXCL8;CCL20;CXCL1;CXCL3;CXCL2;CXCL5;NFKBIB;CCL26
Adipocytokine signaling pathway	5/67	7.46	0.00598077	0.0413786	4.6473	23.7905	NFKBIA;ACSL5;CPT1C;NFKBIE;NFKBIB
TRAF6 mediated NF-kB activation	3/22	13.64	0.00614393	0.0420188	9.0656	46.1645	NFKBIA;NFKB2;NFKBIB
Hypoxia and p53 in the cardiovascular system	3/23	13.04	0.00697636	0.0471697	8.6118	42.7598	NQO1;ABCB1;NFKBIB
Wnt interactions in lipid metabolism and immune response	4/45	8.89	0.00743071	0.0496772	5.6116	27.5089	IL32;MMP1;IL1B;CXCL1
Codeine and morphine metabolism	2/8	25	0.00775588	0.0507115	19.0952	92.7896	ABCB1;ABCC2
Dissolution of fibrin clot	2/8	25	0.00775588	0.0507115	19.0952	92.7896	SERPINB2;SERPINE1
Alpha-9 beta-1 integrin pathway	3/25	12	0.00883328	0.056514	7.8281	37.0211	CSF2;SPP1;SAT1
Basigin interactions	3/25	12	0.00883328	0.056514	7.8281	37.0211	MMP1;SLC3A2;SLC7A11
Apoptosis	10/242	4.13	0.00957944	0.0598629	2.4991	11.6162	NFKBIA;IRAK2;IL1B;CASP1;TRAF1;BID;NFKBIE;MAP3K14;NFKBIB;BIRC3
Diabetes pathways	7/137	5.11	0.00975514	0.0598629	3.1105	14.4015	TSPYL2;CXCL8;MMP1;DDIT3;ASNS;ATF3;ATF4
Benzo(a)pyrene metabolism	2/9	22.22	0.00985881	0.0598629	16.3665	75.6033	AKR1C1;AKR1C3
EGFR transactivation by gastrin	2/9	22.22	0.00985881	0.0598629	16.3665	75.6033	MMP3;HBEGF
Fibroblast growth factor 1	3/26	11.54	0.00985978	0.0598629	7.4874	34.5865	SERPINB2;BAMBI;SERPINE1
Amino acid and oligopeptide SLC transporters	4/49	8.16	0.0100153	0.0601929	5.1118	23.5327	SLC6A6;SLC3A2;SLC7A11;SLC1A5
Free radical-induced apoptosis	2/10	20	0.012184	0.0724948	14.32	63.1172	CXCL8;GSR
Transferrin endocytosis and recycling	3/29	10.34	0.0133411	0.077823	6.6225	28.5886	ATP6V0B;ATP6V0A4;ATP6V0D2
Integrin beta-2 pathway	3/29	10.34	0.0133411	0.077823	6.6225	28.5886	C3;ICAM2;ICAM1
Immune system	27/998	2.71	0.0142763	0.0824702	1.6338	6.9421	CSF2;C1S;NCF2;ICAM2;CTSS;ICAM1;OASL;HERC5;C3;IRAK2;CASP1;FBXO6;PRSS3;CD34;DYNC1I1;EGR1;NFKB2;NFKBIA;IL6;IL1B;TRIB3;IL7R;NFKBIE;SQSTM1;MAP3K14;NFKBIB;BIRC3
Tumor necrosis factor (TNF) pathway	3/30	10	0.0146375	0.0826446	6.3769	26.9369	NFKBIA;NFKB2;BIRC3
Erythropoietin-mediated neuroprotection through NF-kB	2/11	18.18	0.0147232	0.0826446	12.7282	53.6918	NFKBIA;SOD2
Osteopontin signaling	2/11	18.18	0.0147232	0.0826446	12.7282	53.6918	SPP1;MAP3K14
Alpha-V beta-3 integrin/OPN pathway	3/31	9.68	0.0160028	0.0889876	6.1488	25.4253	NFKBIA;SPP1;MAP3K14
Keratinocyte differentiation	4/57	7.02	0.0167809	0.0924503	4.3384	17.7333	NFKBIA;TRAF1;MAP3K14;BIRC3
Glycine, serine and threonine metabolism	3/32	9.38	0.0174372	0.0944884	5.9365	24.0377	PSAT1;CTH;PSPH
Activation of chaperones by ATF6 alpha	2/12	16.67	0.0174685	0.0944884	11.4548	46.3617	DDIT3;ATF4
Amino acid metabolism	8/195	4.1	0.0202142	0.108355	2.4714	9.6418	NQO1;PSAT1;KYNU;CTH;ASNS;GCLM;PSPH;OAZ3
Double stranded RNA-induced gene expression	2/13	15.38	0.0204118	0.108438	10.4129	40.5234	NFKBIA;MAP3K14
Interleukin-2 signaling pathway	23/847	2.72	0.0218896	0.11526	1.6324	6.2385	PTPRR;ABCB1;CSF2;CXCL8;SH2D2A;TXNRD1;SERPINE1;ASNS;CTSW;SLC1A5;CTSS;ICAM1;TM7SF2;IL6;MAP2;PSAT1;IL1B;CASP1;ID3;IL7R;CRYM;ATF4;BIRC3
fMLP induced chemokine gene expression in HMC-1 cells	3/35	8.57	0.0221577	0.115648	5.3791	20.4921	NFKBIA;GNA15;NCF2
Jak-STAT signaling pathway	8/199	4.02	0.0225045	0.116436	2.4191	9.1783	PTPRR;CSF3;IL6;CSF2;CXCL8;IL20RB;IL13RA2;IL7R
Innate immune system	11/319	3.45	0.0232244	0.119125	2.0688	7.7838	HERC5;C3;NFKBIA;C1S;IRAK2;CASP1;PRSS3;CTSS;NFKB2;NFKBIB;BIRC3
Interleukin-6 regulation of target genes	2/14	14.29	0.0235458	0.119741	9.5447	35.7813	TIMP1;ICAM1
Interleukin-12-mediated signaling events	4/65	6.15	0.0258636	0.130414	3.7679	13.7713	GADD45B;IL1B;RELB;NFKB2
Fibrinolysis pathway	2/15	13.33	0.0268629	0.134315	8.81	31.866	SERPINB2;SERPINE1
HIF-1 transcriptional activity in hypoxia	4/66	6.06	0.0271702	0.134719	3.7069	13.3659	ABCB1;SERPINE1;HMOX1;ADM
Adipogenesis	6/133	4.51	0.0279472	0.137426	2.7215	9.7359	IL6;GADD45B;DDIT3;SERPINE1;ID3;TRIB3
G alpha 13 pathway	4/67	5.97	0.0285156	0.139072	3.6479	12.9767	NFKBIA;MAP3K10;MAP3K14;NFKB2
CD40L signaling pathway	2/16	12.5	0.030356	0.144494	8.1803	28.5883	NFKBIA;MAP3K14
p75 neurotrophin receptor signaling via NF-kB	2/16	12.5	0.030356	0.144494	8.1803	28.5883	NFKBIA;SQSTM1
Interleukin-10 anti-inflammatory signaling pathway	2/16	12.5	0.030356	0.144494	8.1803	28.5883	IL6;HMOX1
PPAR signaling pathway	4/69	5.8	0.0313233	0.147916	3.5353	12.2441	MMP1;ACSL5;ANGPTL4;CPT1C
T cell receptor signaling pathway	6/139	4.32	0.0336495	0.157649	2.5979	8.8115	NFKBIA;CSF2;NCF2;NFKBIE;MAP3K14;NFKBIB
Complement activation, classical pathway	2/17	11.76	0.0340179	0.15813	7.6346	25.8116	C3;C1S
Mitochondrial pathway of apoptosis: multidomain Bcl-2 family	4/71	5.63	0.0342881	0.15815	3.4294	11.5673	PRNP;HSPA7;HSPA6;HSPA1B
Bladder cancer	3/42	7.14	0.0356055	0.162963	4.4121	14.7153	CXCL8;MMP1;PGF
Transmembrane transport of small molecules	13/432	3.01	0.0378173	0.170576	1.7977	5.8873	ATP6V0B;SLC13A3;ABCB1;ABCC2;SLC3A2;SLC7A11;SLC1A5;SLC6A6;HMOX1;ATP6V0A4;ATP6V0D2;SLC28A3;FTL
Downregulation of MTA-3 in ER-negative breast tumors	2/18	11.11	0.037842	0.170576	7.1571	23.4346	HSPB1;TUBA4A
RANKL regulation of apoptosis and immune response	4/74	5.41	0.039031	0.174612	3.2819	10.6447	EGR1;IL6;ICAM1;RELB
PI3K events in ERBB2 signaling	3/44	6.82	0.0400656	0.177903	4.1964	13.5008	TRIB3;EREG;HBEGF
Signaling by insulin receptor	5/109	4.59	0.0405784	0.178846	2.7646	8.8591	ATP6V0B;CAB39L;TRIB3;ATP6V0A4;ATP6V0D2
Apoptosis modulation by HSP70	2/19	10.53	0.0418215	0.182969	6.7357	21.3815	BID;HSPA1B
RIG-I/MDA5-mediated induction of interferon-alpha/beta pathways	4/76	5.26	0.0423907	0.184106	3.1905	10.0845	HERC5;NFKBIA;NFKB2;NFKBIB
4-1BB-dependent immune response	2/20	10	0.04595	0.196692	6.3612	19.5938	NFKBIA;TNFRSF9
Interleukin-3 regulation of hematopoietic cells	2/20	10	0.04595	0.196692	6.3612	19.5938	CXCL8;IL1B
Nucleotide-binding domain, leucine rich repeat containing receptor (NLR) signaling pathways	3/47	6.38	0.0472581	0.200847	3.9097	11.9329	IRAK2;CASP1;BIRC3
Peptide G-protein coupled receptors	7/192	3.65	0.0493487	0.20608	2.1796	6.5581	C3;CXCL8;CCL20;CXCL1;CXCL3;CXCL2;CXCL5
Apoptosis modulation and signaling	4/80	5	0.0495846	0.20608	3.0219	9.0781	NFKBIA;BID;MAP3K14;BIRC3
CD28-dependent PI3K/Akt signaling	2/21	9.52	0.0502212	0.20608	6.0261	18.0259	TRIB3;MAP3K14
Mitochondrial role in apoptotic signaling	2/21	9.52	0.0502212	0.20608	6.0261	18.0259	BID;BIRC3
Oxidative stress-induced gene expression via Nrf2	2/21	9.52	0.0502212	0.20608	6.0261	18.0259	POR;HMOX1
MAP kinase signaling pathway	4/81	4.94	0.0514816	0.209805	2.9825	8.8477	NFKBIA;TGFB2;MAP3K10;MAP3K14
Ceramide signaling pathway	3/49	6.12	0.052381	0.210586	3.7393	11.028	NFKBIA;BID;BIRC3
Glycerolipid metabolism	3/49	6.12	0.052381	0.210586	3.7393	11.028	DGKG;GLA;PNLIPRP3
p53 activity regulation	5/118	4.24	0.0537763	0.214744	2.5432	7.4336	CD82;GADD45B;SERPINE1;SESN2;BID
Glycosaminoglycan biosynthesis: chondroitin sulfate	2/22	9.09	0.0546289	0.216695	5.7245	16.6422	B3GAT3;CHPF2
Response to elevated platelet cytosolic calcium	4/83	4.82	0.0553931	0.218271	2.9067	8.41	TGFB2;SERPINE1;TIMP1;TUBA4A
Pathways in cancer	10/325	3.08	0.0563217	0.22047	1.8327	5.2722	NFKBIA;TGFB2;IL6;CXCL8;MMP1;TRAF1;BID;PGF;NFKB2;BIRC3
G alpha (i) signaling events	7/199	3.52	0.0576557	0.222067	2.0994	5.9901	C3;CXCL8;CCL20;CXCL1;CXCL3;CXCL2;CXCL5
Glutathione metabolism	3/51	5.88	0.0577599	0.222067	3.5832	10.2172	GSTM3;GSR;GCLM
Toll receptor cascades	6/159	3.77	0.0578494	0.222067	2.256	6.4294	NFKBIA;IRAK2;MAP3K14;CTSS;NFKB2;NFKBIB
Blood clotting cascade	2/23	8.7	0.0591672	0.22251	5.4516	15.4138	SERPINB2;SERPINE1
Interleukin-11 pathway	2/23	8.7	0.0591672	0.22251	5.4516	15.4138	TIMP1;ICAM1
Nitrogen metabolism	2/23	8.7	0.0591672	0.22251	5.4516	15.4138	CTH;ASNS
C-Myb transcription factor network	4/85	4.71	0.0594606	0.22251	2.8347	8.0006	TFEC;TOM1;CD34;BIRC3
Sulfur amino acid metabolism	2/24	8.33	0.0638304	0.235895	5.2036	14.3177	CTH;GCLM
NF-kappaB signaling pathway	2/24	8.33	0.0638304	0.235895	5.2036	14.3177	NFKBIA;MAP3K14
Neurotrophin signaling pathway	5/126	3.97	0.0673676	0.24743	2.3741	6.4043	NFKBIA;IRAK2;NFKBIE;ATF4;NFKBIB
Protein processing in the endoplasmic reticulum	6/166	3.61	0.0682705	0.24893	2.1565	5.7887	DDIT3;HSPA4L;HSPA6;FBXO6;HSPA1B;ATF4
SHC1 events in ERBB2 signaling	2/25	8	0.0686128	0.24893	4.9771	13.3349	EREG;HBEGF
Vibrio cholerae infection	3/55	5.45	0.0692614	0.249761	3.3068	8.8288	ATP6V0B;ATP6V0A4;ATP6V0D2
Selective expression of chemokine receptors during T-cell polarization	2/26	7.69	0.0735088	0.260344	4.7694	12.4499	TGFB2;CSF2
Selenoamino acid metabolism	2/26	7.69	0.0735088	0.260344	4.7694	12.4499	CTH;SEPHS2
Interleukin-27-mediated signaling events	2/26	7.69	0.0735088	0.260344	4.7694	12.4499	IL6;IL1B
Signal transduction	24/1020	2.35	0.0770972	0.271437	1.4007	3.5895	DGKG;ATP6V0B;CXCL8;CAB39L;CCL20;MMP3;ICAM2;ADM;DTX2;CXCL1;CXCL3;ARHGAP25;CXCL2;CXCL5;ICAM1;EREG;C3;NFKBIA;GNA15;HEY1;ATP6V0A4;JUNB;ATP6V0D2;HBEGF
Collecting duct acid secretion	2/27	7.41	0.0785133	0.27319	4.5784	11.6497	ATP6V0A4;ATP6V0D2
TNF/stress-related signaling	2/27	7.41	0.0785133	0.27319	4.5784	11.6497	NFKBIA;MAP3K14
Cell surface interactions at the vascular wall	4/94	4.26	0.079655	0.275551	2.55	6.4517	ANGPT1;MMP1;SLC3A2;SLC7A11
Cell adhesion molecules (CAMs)	5/133	3.76	0.0806834	0.277495	2.2435	5.6473	ICAM2;NRCAM;CLDN1;CD34;ICAM1
Caspase cascade in apoptosis	3/59	5.08	0.0817089	0.278557	3.07	7.6891	CASP1;BID;BIRC3
Transport of inorganic cations/anions and amino acids/oligopeptides	4/95	4.21	0.0820851	0.278557	2.5219	6.3047	SLC6A6;SLC3A2;SLC7A11;SLC1A5
Abacavir transmembrane transport	1/5	20	0.083333	0.278557	14.2812	35.4876	ABCB1
Sodium-coupled sulphate, di- and tri-carboxylate transporters	1/5	20	0.083333	0.278557	14.2812	35.4876	SLC13A3
Heme degradation	1/5	20	0.083333	0.278557	14.2812	35.4876	HMOX1
Interferon-gamma signaling pathway	4/97	4.12	0.0870538	0.289369	2.4674	6.0234	IL1B;CASP1;ICAM1;OASL
T cell receptor calcium pathway	2/29	6.9	0.088827	0.293623	4.2389	10.2625	CSF2;JUNB
Downstream signaling events Of B cell receptor (BCR)	4/98	4.08	0.0895917	0.294514	2.441	5.8889	NFKBIA;TRIB3;NFKBIE;NFKBIB
Shigellosis	3/62	4.84	0.0916297	0.299559	2.9135	6.9632	NFKBIA;CXCL8;NFKBIB
Activation of C3 and C5	1/6	16.67	0.0991494	0.314951	11.4244	26.4033	C3
Vitamin B6 metabolism	1/6	16.67	0.0991494	0.314951	11.4244	26.4033	PSAT1
Low-density lipoprotein (LDL) pathway during atherogenesis	1/6	16.67	0.0991494	0.314951	11.4244	26.4033	IL6
MSP/RON receptor signaling pathway	1/6	16.67	0.0991494	0.314951	11.4244	26.4033	IL1B
Multi-drug resistance factors	1/6	16.67	0.0991494	0.314951	11.4244	26.4033	ABCB1
CD28 co-stimulation	2/31	6.45	0.0995141	0.314951	3.9461	9.1055	TRIB3;MAP3K14
TGF-beta signaling pathway	6/185	3.24	0.101664	0.320052	1.9257	4.4024	TGFB2;BAMBI;SERPINE1;SPP1;JUNB;ATF3
Syndecan 2 pathway	2/33	6.06	0.110537	0.341214	3.6912	8.1294	CSF2;CXCL8
Activation of NF-kappaB in B cells	3/68	4.41	0.11286	0.341214	2.6437	5.7676	NFKBIA;NFKBIE;NFKBIB
CD8/T cell receptor downstream pathway	3/68	4.41	0.11286	0.341214	2.6437	5.7676	EGR1;TNFRSF9;JUNB
Activation of PKC through G-protein coupled receptors	1/7	14.29	0.114694	0.341214	9.5199	20.6152	NFKBIA
BAD activation and translocation to mitochondria	1/7	14.29	0.114694	0.341214	9.5199	20.6152	BID
Transport of nucleosides and free purine and pyrimidine bases across the plasma membrane	1/7	14.29	0.114694	0.341214	9.5199	20.6152	SLC28A3
Highly sodium permeable acetylcholine nicotinic receptors	1/7	14.29	0.114694	0.341214	9.5199	20.6152	CHRNE
Inactivation of BCL-2 by BH3-only proteins	1/7	14.29	0.114694	0.341214	9.5199	20.6152	BID
Negative regulation of the PI3K/Akt network	1/7	14.29	0.114694	0.341214	9.5199	20.6152	TRIB3
Neurofascin interactions	1/7	14.29	0.114694	0.341214	9.5199	20.6152	NRCAM
NrCAM interactions	1/7	14.29	0.114694	0.341214	9.5199	20.6152	NRCAM
Nuclear receptors in lipid metabolism and toxicity	2/34	5.88	0.116164	0.343867	3.5756	7.6974	ABCB1;ABCC2
Complement and coagulation cascades	3/70	4.29	0.120317	0.352654	2.5645	5.4307	C3;C1S;SERPINE1
Nucleotide metabolism	3/70	4.29	0.120317	0.352654	2.5645	5.4307	TXNRD1;GSR;GLRX
RIG-I-like receptor signaling pathway	3/71	4.23	0.124113	0.360229	2.5267	5.2721	NFKBIA;CXCL8;NFKBIB
Interleukin-6 signaling pathway	3/71	4.23	0.124113	0.360229	2.5267	5.2721	IL6;TIMP1;JUNB
Lipid metabolism regulation by peroxisome proliferator-activated receptor alpha (PPAR-alpha)	4/112	3.57	0.128659	0.363063	2.1231	4.3535	TXNRD1;ANKRD1;TRIB3;ANGPTL4
Proepithelin conversion to epithelin and wound repair control	1/8	12.5	0.129971	0.363063	8.1595	16.649	CXCL8
Cross-presentation of particulate exogenous antigens (phagosomes)	1/8	12.5	0.129971	0.363063	8.1595	16.649	NCF2
Degradation of cysteine and homocysteine	1/8	12.5	0.129971	0.363063	8.1595	16.649	CTH
Eosinophils in the chemokine network of allergy	1/8	12.5	0.129971	0.363063	8.1595	16.649	CSF2
Hydrolysis of lysophosphatidylcholine (LPC)	1/8	12.5	0.129971	0.363063	8.1595	16.649	PLA2G4C
Insulin secretion regulation by fatty acids bound to GPR40 (FFAR1)	1/8	12.5	0.129971	0.363063	8.1595	16.649	GNA15
Nicotinate metabolism	1/8	12.5	0.129971	0.363063	8.1595	16.649	NMNAT1
Myometrial relaxation and contraction pathways	5/155	3.23	0.130737	0.363498	1.9123	3.8906	IL6;IL1B;ADM;ATF3;ATF4
ERBB4 signaling events	2/38	5.26	0.139338	0.382056	3.1777	6.2627	EREG;HBEGF
p38 alpha/beta MAPK downstream pathway	2/38	5.26	0.139338	0.382056	3.1777	6.2627	DDIT3;HSPB1
Glycosphingolipid metabolism	2/38	5.26	0.139338	0.382056	3.1777	6.2627	GBA;GLA
Platelet activation, signaling and aggregation	6/205	2.93	0.14447	0.388585	1.7304	3.3478	DGKG;TGFB2;GNA15;SERPINE1;TIMP1;TUBA4A
Alpha defensins	1/9	11.11	0.144985	0.388585	7.1392	13.7867	PRSS3
Endosomal/vacuolar pathway	1/9	11.11	0.144985	0.388585	7.1392	13.7867	CTSS
Inhibition of matrix metalloproteinases	1/9	11.11	0.144985	0.388585	7.1392	13.7867	TIMP1
PI3K/AKT signalling	1/9	11.11	0.144985	0.388585	7.1392	13.7867	TRIB3
Prolactin regulation of apoptosis	4/118	3.39	0.147251	0.392461	2.0107	3.8517	EGR1;ANGPT1;HMOX1;CLDN1
Mitochondrial pathway of apoptosis: caspases	3/77	3.9	0.14775	0.392461	2.3211	4.4385	HSPB1;HSPA1B;BIRC3
Immunoregulatory interactions between a lymphoid and a non-lymphoid cell	4/119	3.36	0.150447	0.397847	1.9931	3.7753	C3;ICAM2;CD34;ICAM1
Nuclear signaling by ErbB4	2/40	5	0.151272	0.397952	3.0101	5.6852	EREG;HBEGF
Peroxisome	3/78	3.85	0.151824	0.397952	2.2901	4.3168	PRDX1;ACSL5;SOD2
Plasma membrane estrogen receptor signaling	2/41	4.88	0.157312	0.404449	2.9328	5.4243	GNA15;HBEGF
Alpha-M beta-2 integrin signaling	2/41	4.88	0.157312	0.404449	2.9328	5.4243	IL6;ICAM1
Transcriptional activity of SMAD2/SMAD3-SMAD4 heterotrimer	2/41	4.88	0.157312	0.404449	2.9328	5.4243	SERPINE1;JUNB
Graft-versus-host disease	2/41	4.88	0.157312	0.404449	2.9328	5.4243	IL6;IL1B
Abacavir transport and metabolism	1/10	10	0.15974	0.404449	6.3456	11.6392	ABCB1
Calcitonin-like ligand receptors	1/10	10	0.15974	0.404449	6.3456	11.6392	ADM
IRAK2-mediated activation of TAK1 complex	1/10	10	0.15974	0.404449	6.3456	11.6392	IRAK2
Insulin secretion regulation by acetylcholine	1/10	10	0.15974	0.404449	6.3456	11.6392	GNA15
Urokinase-type plasminogen activator (uPA) and uPAR-mediated signaling	2/42	4.76	0.163398	0.410218	2.8593	5.1799	SERPINE1;MMP3
Fatty acid metabolism	2/42	4.76	0.163398	0.410218	2.8593	5.1799	ACSL5;CPT1C
Antigen processing and presentation	3/81	3.7	0.164253	0.410632	2.2016	3.9769	HSPA6;CTSS;HSPA1B
p75 neurotrophin receptor-mediated signaling	4/124	3.23	0.166811	0.414696	1.9096	3.4199	NFKBIA;MMP3;SQSTM1;BIRC3
Porphyrin and chlorophyll metabolism	2/43	4.65	0.169524	0.414696	2.7894	4.9506	HMOX1;FTL
Drug metabolism: cytochrome P450	3/83	3.61	0.172702	0.414696	2.1464	3.7695	GSTM3;AKR1C1;AKR1C3
Alternative complement pathway	1/11	9.09	0.174242	0.414696	5.7108	9.9785	C3
B lymphocyte cell surface molecules	1/11	9.09	0.174242	0.414696	5.7108	9.9785	ICAM1
Bone mineralization regulation	1/11	9.09	0.174242	0.414696	5.7108	9.9785	SPP1
Serotonin transporter activity	1/11	9.09	0.174242	0.414696	5.7108	9.9785	IL1B
Signaling by VEGF	1/11	9.09	0.174242	0.414696	5.7108	9.9785	PGF
Cardiac protection against reactive oxygen species	1/11	9.09	0.174242	0.414696	5.7108	9.9785	SOD2
Tryptophan catabolism	1/11	9.09	0.174242	0.414696	5.7108	9.9785	KYNU
Glutathione biosynthesis and recycling	1/11	9.09	0.174242	0.414696	5.7108	9.9785	GCLM
Monocyte and its surface molecules	1/11	9.09	0.174242	0.414696	5.7108	9.9785	ICAM1
Metabolism	33/1615	2.04	0.176241	0.417782	1.2083	2.0975	DGKG;ABCB1;GBA;GLRX;SAT1;OAZ3;TM7SF2;GNA15;KYNU;ANKRD1;GCNT2;HMOX1;GCNT3;ATP6V0A4;SEPHS2;PSPH;NQO1;ATP6V0B;CHPF2;B3GAT3;GSR;TALDO1;ACSL5;ASNS;NMNAT1;PSAT1;CTH;ANGPTL4;GCLM;ATP6V0D2;ST6GALNAC4;GLA;PNLIPRP3
Small cell lung cancer	3/84	3.57	0.176972	0.417851	2.1198	3.6709	NFKBIA;TRAF1;BIRC3
Fatty acid, triacylglycerol, and ketone body metabolism	5/173	2.89	0.179854	0.422977	1.7058	2.9265	TXNRD1;ANKRD1;ACSL5;TRIB3;ANGPTL4
Integrin cell surface interactions	3/85	3.53	0.181271	0.424407	2.0938	3.5757	ICAM2;SPP1;ICAM1
HNF3B pathway	2/45	4.44	0.181889	0.424407	2.6594	4.5326	AFP;CPT1C
Hemostasis pathway	11/468	2.35	0.187377	0.431361	1.3835	2.3169	DGKG;TGFB2;GNA15;SERPINB2;ANGPT1;MMP1;SERPINE1;SLC3A2;SLC7A11;TIMP1;TUBA4A
SODD/TNFR1 signaling pathway	1/12	8.33	0.188494	0.431361	5.1913	8.6627	BIRC3
Bile salt and organic anion SLC transporters	1/12	8.33	0.188494	0.431361	5.1913	8.6627	SLC13A3
D4-GDI signaling pathway	1/12	8.33	0.188494	0.431361	5.1913	8.6627	CASP1
Toll-like receptor endosomal trafficking and processing	1/12	8.33	0.188494	0.431361	5.1913	8.6627	CTSS
ABC transporters	2/47	4.26	0.194381	0.441438	2.541	4.162	ABCB1;ABCC2
Delta Np63 pathway	2/47	4.26	0.194381	0.441438	2.541	4.162	RRAD;ADRM1
ATM pathway	2/48	4.17	0.200668	0.446252	2.4856	3.9922	NFKBIA;BID
Chondroitin sulfate/dermatan sulfate metabolism	2/48	4.17	0.200668	0.446252	2.4856	3.9922	B3GAT3;CHPF2
Intestinal immune network for IgA production	2/48	4.17	0.200668	0.446252	2.4856	3.9922	IL6;MAP3K14
CTL mediated immune response against target cells	1/13	7.69	0.202501	0.446252	4.7585	7.5993	ICAM1
T helper cell surface molecules	1/13	7.69	0.202501	0.446252	4.7585	7.5993	ICAM1
TACI and BCMA stimulation of B cell immune responses	1/13	7.69	0.202501	0.446252	4.7585	7.5993	MAP3K14
Irinotecan pathway	1/13	7.69	0.202501	0.446252	4.7585	7.5993	ABCC2
MAP kinase downregulation by phosphorylation of MEK1 by Cdk5/p35	1/13	7.69	0.202501	0.446252	4.7585	7.5993	EGR1
Interleukin-5 signaling pathway	2/49	4.08	0.206978	0.454434	2.4326	3.8317	IL6;IL1B
Natural killer cell-mediated cytotoxicity	4/137	2.92	0.212004	0.460245	1.7218	2.6707	CSF2;ICAM2;BID;ICAM1
Type II interferon signaling (interferon-gamma)	2/50	4	0.213308	0.460245	2.3818	3.6799	IL1B;ICAM1
Acetylcholine binding and downstream events	1/14	7.14	0.216267	0.460245	4.3922	6.7256	CHRNE
Platelet amyloid precursor protein pathway	1/14	7.14	0.216267	0.460245	4.3922	6.7256	SERPINE1
Porphyrin metabolism	1/14	7.14	0.216267	0.460245	4.3922	6.7256	HMOX1
Complement cascade regulation	1/14	7.14	0.216267	0.460245	4.3922	6.7256	C3
Glycosphingolipid biosynthesis: globo series	1/14	7.14	0.216267	0.460245	4.3922	6.7256	GLA
Lectin-induced complement pathway	1/14	7.14	0.216267	0.460245	4.3922	6.7256	C3
Signaling by ERBB4	3/93	3.23	0.216586	0.460245	1.9069	2.9171	TRIB3;EREG;HBEGF
Stress induction of HSP regulation	1/15	6.67	0.229796	0.483139	4.0783	5.9974	HSPB1
Validated nuclear estrogen receptor beta network	1/15	6.67	0.229796	0.483139	4.0783	5.9974	C3
Glycosphingolipid biosynthesis: ganglio series	1/15	6.67	0.229796	0.483139	4.0783	5.9974	ST6GALNAC4
Protein folding	2/53	3.77	0.2324	0.483489	2.2414	3.2708	FBXO6;TUBA4A
Amyotrophic lateral sclerosis (ALS)	2/53	3.77	0.2324	0.483489	2.2414	3.2708	CASP1;BID
JNK/MAPK pathway	2/53	3.77	0.2324	0.483489	2.2414	3.2708	MAP3K10;MAP3K14
Mitochondrial pathway of apoptosis: BH3-only Bcl-2 family	3/97	3.09	0.234752	0.486681	1.8254	2.6454	CTSW;BID;CTSS
Pantothenate and CoA biosynthesis	1/16	6.25	0.243092	0.48888	3.8062	5.3832	VNN1
Acetylation and deacetylation of RelA in the nucleus	1/16	6.25	0.243092	0.48888	3.8062	5.3832	NFKBIA
Acyl chain remodelling of phosphatidylinositol	1/16	6.25	0.243092	0.48888	3.8062	5.3832	PLA2G4C
Protein kinase A (PKA) at the centrosome	1/16	6.25	0.243092	0.48888	3.8062	5.3832	MAP2
Cell death signaling by NRIF in the nucleus	1/16	6.25	0.243092	0.48888	3.8062	5.3832	SQSTM1
Inhibitor of DNA binding (ID) signaling pathway	1/16	6.25	0.243092	0.48888	3.8062	5.3832	ID3
JNK (c-Jun kinases) phosphorylation and activation mediated by activated human TAK1	1/16	6.25	0.243092	0.48888	3.8062	5.3832	IRAK2
Other glycan degradation	1/16	6.25	0.243092	0.48888	3.8062	5.3832	GBA
Adaptive immune system	13/606	2.15	0.249358	0.48888	1.2587	1.7482	NCF2;ICAM2;CTSS;ICAM1;C3;NFKBIA;FBXO6;TRIB3;NFKBIE;CD34;MAP3K14;DYNC1I1;NFKBIB
Steroid hormone biosynthesis	2/56	3.57	0.251589	0.48888	2.1165	2.9207	AKR1C1;AKR1C3
Thromboxane A2 receptor signaling	2/56	3.57	0.251589	0.48888	2.1165	2.9207	GNA15;ICAM1
Activation of BH3-only proteins	1/17	5.88	0.256159	0.48888	3.5681	4.8596	BID
Post-chaperonin tubulin folding pathway	1/17	5.88	0.256159	0.48888	3.5681	4.8596	TUBA4A
Atypical NF-kappaB pathway	1/17	5.88	0.256159	0.48888	3.5681	4.8596	NFKBIA
Cadmium-induced DNA biosynthesis and proliferation in macrophages	1/17	5.88	0.256159	0.48888	3.5681	4.8596	NFKBIA
Sulfation biotransformation reaction	1/17	5.88	0.256159	0.48888	3.5681	4.8596	GSR
Syndecan 3 pathway	1/17	5.88	0.256159	0.48888	3.5681	4.8596	CXCL8
TAK1-mediated activation of p38 MAPK	1/17	5.88	0.256159	0.48888	3.5681	4.8596	IRAK2
Dendritic cells in regulating TH1 and TH2 development	1/17	5.88	0.256159	0.48888	3.5681	4.8596	CSF2
Energy-dependent regulation of mTOR by LKB1-AMPK	1/17	5.88	0.256159	0.48888	3.5681	4.8596	CAB39L
Estrogen metabolism	1/17	5.88	0.256159	0.48888	3.5681	4.8596	NQO1
Inflammasomes	1/17	5.88	0.256159	0.48888	3.5681	4.8596	CASP1
Insulin-like growth factor (IGF) activity regulation by insulin-like growth factor binding proteins (IGFBPs)	1/17	5.88	0.256159	0.48888	3.5681	4.8596	MMP1
Osteoclast signaling	1/17	5.88	0.256159	0.48888	3.5681	4.8596	SPP1
Signaling by ERBB2	3/102	2.94	0.257814	0.48888	1.7328	2.3488	TRIB3;EREG;HBEGF
Pathogenic Escherichia coli infection	2/57	3.51	0.257997	0.48888	2.0779	2.8152	CLDN1;TUBA4A
SHP2 signaling	2/57	3.51	0.257997	0.48888	2.0779	2.8152	IL6;ANGPT1
Signaling by the B cell receptor (BCR)	4/151	2.65	0.263929	0.493998	1.5567	2.0736	NFKBIA;TRIB3;NFKBIE;NFKBIB
SLC-mediated transmembrane transport	6/251	2.39	0.266576	0.493998	1.4022	1.8538	SLC6A6;SLC13A3;SLC3A2;SLC7A11;SLC1A5;SLC28A3
Interleukin-4 signaling pathway	3/104	2.88	0.267125	0.493998	1.6983	2.2418	NFKBIA;IL13RA2;CCL26
Activated AMPK stimulation of fatty-acid oxidation in muscle	1/18	5.56	0.269001	0.493998	3.3581	4.4093	CAB39L
Bone remodeling	1/18	5.56	0.269001	0.493998	3.3581	4.4093	NFKBIA
Serotonin receptor 4/6/7 and NR3C signaling	1/18	5.56	0.269001	0.493998	3.3581	4.4093	EGR1
Botulinum neurotoxicity	1/18	5.56	0.269001	0.493998	3.3581	4.4093	VAMP1
Sodium/chloride-dependent neurotransmitter transporters	1/18	5.56	0.269001	0.493998	3.3581	4.4093	SLC6A6
Tie2 signaling	1/18	5.56	0.269001	0.493998	3.3581	4.4093	ANGPT1
Fatty acyl-CoA biosynthesis	1/18	5.56	0.269001	0.493998	3.3581	4.4093	ACSL5
STAT3 pathway	1/19	5.26	0.281622	0.510869	3.1714	4.0187	IL6
TP53 network	1/19	5.26	0.281622	0.510869	3.1714	4.0187	BID
Tob role in T-cell activation	1/19	5.26	0.281622	0.510869	3.1714	4.0187	TGFB2
IGF-1 receptor and longevity	1/19	5.26	0.281622	0.510869	3.1714	4.0187	SOD2
Cytochrome P450 pathway	2/61	3.28	0.283632	0.512952	1.9367	2.4403	CYB5R1;POR
Apoptotic signaling in response to DNA damage	1/20	5	0.294026	0.526944	3.0043	3.6775	BID
Chondroitin sulfate biosynthesis	1/20	5	0.294026	0.526944	3.0043	3.6775	CHPF2
GATA3-mediated activation of Th2 cytokine expression	1/20	5	0.294026	0.526944	3.0043	3.6775	JUNB
O-linked glycosylation of mucins	2/63	3.17	0.296425	0.529649	1.873	2.2774	GCNT3;ST6GALNAC4
Antigen-activated B-cell receptor generation of second messengers	5/211	2.37	0.300178	0.53148	1.3884	1.6708	NFKBIA;PRDX1;NFKBIE;NFKB2;NFKBIB
Collagen biosynthesis and modifying enzymes	2/64	3.12	0.30281	0.53148	1.8427	2.2013	COL27A1;PCOLCE2
Ubiquitin-mediated degradation of phosphorylated Cdc25A	2/64	3.12	0.30281	0.53148	1.8427	2.2013	NQO1;OAZ3
Validated nuclear estrogen receptor alpha network	2/64	3.12	0.30281	0.53148	1.8427	2.2013	C3;CD82
Endothelins	2/64	3.12	0.30281	0.53148	1.8427	2.2013	GNA15;MMP1
Interferon alpha/beta signaling	2/64	3.12	0.30281	0.53148	1.8427	2.2013	EGR1;OASL
Prion pathway	1/21	4.76	0.306216	0.532744	2.8539	3.3775	PRNP
Y branching of actin filaments	1/21	4.76	0.306216	0.532744	2.8539	3.3775	PIR
p38 MK2 pathway	1/21	4.76	0.306216	0.532744	2.8539	3.3775	HSPB1
mTOR signaling pathway	3/113	2.65	0.309409	0.53673	1.5586	1.8284	CAB39L;DDIT4;PGF
Retinoblastoma protein regulation	2/66	3.03	0.315546	0.54263	1.7849	2.0588	TGFB2;CSF2
Signaling by TGF-beta receptor complex	2/66	3.03	0.315546	0.54263	1.7849	2.0588	SERPINE1;JUNB
Endochondral ossification	2/66	3.03	0.315546	0.54263	1.7849	2.0588	TGFB2;SPP1
AKT signaling pathway	1/22	4.55	0.318196	0.544042	2.7179	3.1122	NFKBIA
T cell receptor downstream signaling	1/22	4.55	0.318196	0.544042	2.7179	3.1122	NFKBIA
SIDS susceptibility pathways	2/67	2.99	0.321895	0.54879	1.7573	1.992	IL6;CXCL8
Leukocyte transendothelial migration	3/117	2.56	0.328299	0.553049	1.5036	1.6748	NCF2;CLDN1;ICAM1
Interferon signaling	4/168	2.38	0.329608	0.553049	1.3941	1.5473	HERC5;EGR1;ICAM1;OASL
Angiogenesis	1/23	4.35	0.32997	0.553049	2.5942	2.8763	ANGPT1
Signaling events mediated by PRL	1/23	4.35	0.32997	0.553049	2.5942	2.8763	EGR1
Signaling events mediated by the hedgehog family	1/23	4.35	0.32997	0.553049	2.5942	2.8763	TGFB2
Modulation of interferon signaling by chaperones	1/23	4.35	0.32997	0.553049	2.5942	2.8763	NFKBIA
Pancreatic cancer	2/70	2.86	0.340849	0.558289	1.6796	1.8077	TGFB2;PGF
Renal cell carcinoma	2/70	2.86	0.340849	0.558289	1.6796	1.8077	TGFB2;PGF
Signaling events mediated by HDAC class I	2/70	2.86	0.340849	0.558289	1.6796	1.8077	NFKBIA;SIRT4
G alpha q pathway	2/70	2.86	0.340849	0.558289	1.6796	1.8077	NFKBIA;NFKB2
MicroRNA regulation of DNA damage response	2/70	2.86	0.340849	0.558289	1.6796	1.8077	GADD45B;BID
Cholesterol biosynthesis	1/24	4.17	0.341542	0.558289	2.4813	2.6656	TM7SF2
Tumor suppressor Arf inhibits ribosomal biogenesis	1/24	4.17	0.341542	0.558289	2.4813	2.6656	NFKBIB
Endogenous Toll-like receptor signaling	1/24	4.17	0.341542	0.558289	2.4813	2.6656	IRAK2
Nicotinate and nicotinamide metabolism	1/24	4.17	0.341542	0.558289	2.4813	2.6656	NMNAT1
Viral myocarditis	2/71	2.82	0.347131	0.558334	1.6551	1.7512	BID;ICAM1
Notch signaling pathway	3/121	2.48	0.347181	0.558334	1.4523	1.5365	HEY1;DTX2;BIRC3
Corticotropin releasing hormone pathway	1/25	4	0.352914	0.558334	2.3778	2.4765	CXCL8
Fatty acid biosynthesis	1/25	4	0.352914	0.558334	2.3778	2.4765	ACSL5
Ghrelin pathway	1/25	4	0.352914	0.558334	2.3778	2.4765	CXCL8
Glutathione conjugation	1/25	4	0.352914	0.558334	2.3778	2.4765	GCLM
PIP2 hydrolysis	1/25	4	0.352914	0.558334	2.3778	2.4765	DGKG
Metapathway biotransformation	4/174	2.3	0.353083	0.558334	1.3445	1.3997	GSTM3;AKR1C1;GSR;AKR1C3
Sphingolipid metabolism	2/72	2.78	0.353394	0.558334	1.6314	1.6969	GBA;GLA
Costimulation by the CD28 family	2/72	2.78	0.353394	0.558334	1.6314	1.6969	TRIB3;MAP3K14
Myocyte adrenergic pathway	2/72	2.78	0.353394	0.558334	1.6314	1.6969	GNA15;PLA2G4C
Signaling by NOTCH1	2/73	2.74	0.359635	0.558334	1.6083	1.6448	HEY1;DTX2
Chronic myeloid leukemia	2/73	2.74	0.359635	0.558334	1.6083	1.6448	NFKBIA;TGFB2
Acyl chain remodelling of phosphatidylcholine	1/26	3.85	0.36409	0.558334	2.2826	2.3062	PLA2G4C
Steroid biosynthesis	1/26	3.85	0.36409	0.558334	2.2826	2.3062	TM7SF2
TGF-beta signaling in development	1/26	3.85	0.36409	0.558334	2.2826	2.3062	TGFB2
Termination of O-glycan biosynthesis	1/26	3.85	0.36409	0.558334	2.2826	2.3062	ST6GALNAC4
Tetrasaccharide linker sequence formation in glycosaminoglycan biosynthesis	1/26	3.85	0.36409	0.558334	2.2826	2.3062	B3GAT3
ERBB2 role in signal transduction and oncology	1/26	3.85	0.36409	0.558334	2.2826	2.3062	IL6
Galactose metabolism	1/26	3.85	0.36409	0.558334	2.2826	2.3062	GLA
Glycosaminoglycan biosynthesis: heparan sulfate	1/26	3.85	0.36409	0.558334	2.2826	2.3062	B3GAT3
Inhibition of activated T cell apoptosis by neuropeptides VIP and PACAP	1/26	3.85	0.36409	0.558334	2.2826	2.3062	NFKBIA
Interaction between L1-type proteins and ankyrins	1/26	3.85	0.36409	0.558334	2.2826	2.3062	NRCAM
Interleukin-9 regulation of target genes	1/26	3.85	0.36409	0.558334	2.2826	2.3062	JUNB
Seven transmembrane receptor signaling through beta-arrestin	2/74	2.7	0.365854	0.559596	1.5859	1.5947	NFKBIA;NFKB2
Prolactin activation of MAPK signaling	2/75	2.67	0.372049	0.564984	1.5641	1.5465	NFKBIA;NFKBIB
Pentose phosphate pathway	1/27	3.7	0.375074	0.564984	2.1947	2.1522	TALDO1
CTCF pathway	1/27	3.7	0.375074	0.564984	2.1947	2.1522	TGFB2
Cooperation of prefoldin and TriC/CCT in actin and tubulin folding	1/27	3.7	0.375074	0.564984	2.1947	2.1522	TUBA4A
VEGFR1 pathway	1/27	3.7	0.375074	0.564984	2.1947	2.1522	PGF
Glycosphingolipid biosynthesis: lacto and neolacto series	1/27	3.7	0.375074	0.564984	2.1947	2.1522	GCNT2
VEGF signaling pathway	2/76	2.63	0.378221	0.568286	1.5429	1.5001	SH2D2A;HSPB1
Disease	13/674	1.93	0.380241	0.569883	1.1252	1.088	TSPYL2;ATP6V0B;CXCL8;NCF2;MMP1;ASNS;DDIT3;VAMP1;TRIB3;ATP6V0A4;ATP6V0D2;ATF3;ATF4
Complement cascade	2/77	2.6	0.384367	0.571123	1.5223	1.4555	C3;C1S
RNA polymerase III transcription initiation From type 3 promoter	1/28	3.57	0.385868	0.571123	2.1133	2.0124	BRF2
Cell cycle: G1/S checkpoint	1/28	3.57	0.385868	0.571123	2.1133	2.0124	TGFB2
Interleukin receptor SHC signaling	1/28	3.57	0.385868	0.571123	2.1133	2.0124	CSF2
PKB-mediated events	1/28	3.57	0.385868	0.571123	2.1133	2.0124	CAB39L
ADP-ribosylation factor	1/29	3.45	0.396477	0.576929	2.0377	1.8851	NCF2
Amine compound SLC transporters	1/29	3.45	0.396477	0.576929	2.0377	1.8851	SLC6A6
Association of TriC/CCT with target proteins during biosynthesis	1/29	3.45	0.396477	0.576929	2.0377	1.8851	FBXO6
S1P/S1P3 pathway	1/29	3.45	0.396477	0.576929	2.0377	1.8851	GNA15
Influence of Ras and Rho proteins on G1 to S transition	1/29	3.45	0.396477	0.576929	2.0377	1.8851	NFKBIA
Antigen processing: cross presentation	2/79	2.53	0.396578	0.576929	1.4826	1.3712	NCF2;CTSS
p73 transcription factor network	2/79	2.53	0.396578	0.576929	1.4826	1.3712	SERPINE1;AFP
Apoptosis intrinsic pathway	1/30	3.33	0.406903	0.58339	1.9673	1.769	BID
TNFR1 signaling pathway	1/30	3.33	0.406903	0.58339	1.9673	1.769	BIRC3
Tight junction interactions	1/30	3.33	0.406903	0.58339	1.9673	1.769	CLDN1
Nectin adhesion pathway	1/30	3.33	0.406903	0.58339	1.9673	1.769	CLDN1
O-glycan biosynthesis	1/30	3.33	0.406903	0.58339	1.9673	1.769	GCNT3
Ovarian infertility genes	1/30	3.33	0.406903	0.58339	1.9673	1.769	EGR1
GPCR ligand binding	8/410	1.95	0.412258	0.586854	1.1369	1.0074	C3;CXCL8;CCL20;ADM;CXCL1;CXCL3;CXCL2;CXCL5
SMAD2/3 nuclear pathway	2/82	2.44	0.414683	0.586854	1.4267	1.2559	SERPINE1;ATF3
Activated NOTCH1 signaling in the nucleus	1/31	3.23	0.417149	0.586854	1.9016	1.6626	DTX2
Signal amplification	1/31	3.23	0.417149	0.586854	1.9016	1.6626	GNA15
Stathmin and breast cancer resistance to antimicrotubule agents	1/31	3.23	0.417149	0.586854	1.9016	1.6626	TUBA4A
Transport of vitamins, nucleosides, and related molecules	1/31	3.23	0.417149	0.586854	1.9016	1.6626	SLC28A3
One-carbon metabolism	1/31	3.23	0.417149	0.586854	1.9016	1.6626	ALDH1L2
Oxidative phosphorylation	3/136	2.21	0.417209	0.586854	1.2876	1.1255	ATP6V0B;ATP6V0A4;ATP6V0D2
T cell signal transduction	2/83	2.41	0.420658	0.59031	1.4091	1.2202	PRDX1;NFKB2
Differentiation pathway in PC12 cells	2/84	2.38	0.426602	0.595305	1.3918	1.1857	EGR1;MAP2
Alanine, aspartate and glutamate metabolism	1/32	3.12	0.427219	0.595305	1.8402	1.565	ASNS
Alpha-synuclein signaling	1/32	3.12	0.427219	0.595305	1.8402	1.565	UCHL1
TGF-beta regulation of skeletal system development	2/85	2.35	0.432513	0.601274	1.375	1.1524	TGFB2;ID3
Negative regulators of RIG-I/MDA5 signaling	1/33	3.03	0.437115	0.606255	1.7826	1.4752	HERC5
Cysteine and methionine metabolism	1/34	2.94	0.446841	0.609794	1.7285	1.3924	CTH
TOR signaling	1/34	2.94	0.446841	0.609794	1.7285	1.3924	DDIT4
EGF receptor transactivation by GPCRs in cardiac hypertrophy	1/34	2.94	0.446841	0.609794	1.7285	1.3924	NFKBIA
Fatty acid beta oxidation	1/34	2.94	0.446841	0.609794	1.7285	1.3924	ACSL5
HIF-2-alpha transcription factor network	1/34	2.94	0.446841	0.609794	1.7285	1.3924	SERPINE1
MAPK/TRK pathway	1/34	2.94	0.446841	0.609794	1.7285	1.3924	EGR1
Monoamine transport	1/34	2.94	0.446841	0.609794	1.7285	1.3924	IL1B
Prostate cancer	2/89	2.25	0.455827	0.612996	1.3115	1.0304	NFKBIA;ATF4
Primary immunodeficiency	1/35	2.86	0.456399	0.612996	1.6776	1.3159	IL7R
Arf6 signal transduction regulation	1/35	2.86	0.456399	0.612996	1.6776	1.3159	GNA15
Autophagy regulation	1/35	2.86	0.456399	0.612996	1.6776	1.3159	GABARAPL1
Ether lipid metabolism	1/35	2.86	0.456399	0.612996	1.6776	1.3159	ENPP2
Integrated cancer pathway	1/35	2.86	0.456399	0.612996	1.6776	1.3159	MMP1
Interleukin-7 signaling pathway	1/35	2.86	0.456399	0.612996	1.6776	1.3159	IL7R
SNARE interactions in vesicular transport	1/36	2.78	0.465792	0.621405	1.6296	1.245	VAMP1
GM-CSF-mediated signaling events	1/36	2.78	0.465792	0.621405	1.6296	1.245	CSF2
PI3K/PLC/TRK pathway	1/36	2.78	0.465792	0.621405	1.6296	1.245	EGR1
Lipid and lipoprotein metabolism	9/489	1.84	0.469213	0.624568	1.07	0.8097	TXNRD1;GBA;PLA2G4C;ANKRD1;ACSL5;TRIB3;ANGPTL4;GLA;TM7SF2
ALK in cardiac myocytes	1/37	2.7	0.475024	0.628635	1.5842	1.1793	TGFB2
PI3K/AKT activation	1/37	2.7	0.475024	0.628635	1.5842	1.1793	TRIB3
FSH regulation of apoptosis	5/263	1.9	0.476393	0.628635	1.1056	0.8198	ANGPT1;TFPI2;CTSW;TIMP1;EREG
Gastrin-CREB signaling pathway via PKC and MAPK	4/206	1.94	0.476495	0.628635	1.1296	0.8374	DGKG;GNA15;MMP3;HBEGF
BMAL1-CLOCK/NPAS2 activates circadian expression	1/38	2.63	0.484097	0.631768	1.5413	1.1182	SERPINE1
Striated muscle contraction	1/38	2.63	0.484097	0.631768	1.5413	1.1182	TMOD1
Trefoil factor initiation of mucosal healing	1/38	2.63	0.484097	0.631768	1.5413	1.1182	NFKBIA
Triglyceride biosynthesis	1/38	2.63	0.484097	0.631768	1.5413	1.1182	ACSL5
ERBB signaling pathway	2/94	2.13	0.484178	0.631768	1.2399	0.8993	EREG;HBEGF
FAS pathway and stress induction of heat shock protein regulation	1/39	2.56	0.493013	0.640486	1.5007	1.0613	HSPB1
GAB1 signalosome	1/39	2.56	0.493013	0.640486	1.5007	1.0613	TRIB3
Transport of glucose and other sugars, bile salts and organic acids, metal ions and amine compounds	2/96	2.08	0.495261	0.642005	1.2134	0.8526	SLC6A6;SLC13A3
FOXM1 transcription factor network	1/41	2.44	0.510387	0.660175	1.4255	0.9588	HSPA1B
Dilated cardiomyopathy	2/100	2	0.516967	0.667235	1.1636	0.7677	TGFB2;IL6
BMP receptor signaling	1/42	2.38	0.51885	0.668216	1.3907	0.9125	BAMBI
Insulin signaling pathway	5/277	1.81	0.52199	0.669755	1.048	0.6813	EGR1;RRAD;MAP3K10;TRIB3;MAP3K14
GnRH signaling pathway	2/101	1.98	0.522296	0.669755	1.1518	0.7481	ATF4;HBEGF
Beta-3 integrin cell surface interactions	1/43	2.33	0.527168	0.6731	1.3575	0.8691	SPP1
Type 1 diabetes mellitus	1/43	2.33	0.527168	0.6731	1.3575	0.8691	IL1B
MHC class II antigen presentation	2/103	1.94	0.532836	0.676281	1.1289	0.7107	CTSS;DYNC1I1
ERBB2/ERBB3 signaling events	1/44	2.27	0.535342	0.676281	1.3259	0.8285	CHRNE
Vasopressin-regulated water reabsorption	1/44	2.27	0.535342	0.676281	1.3259	0.8285	DYNC1I1
Heart development	1/44	2.27	0.535342	0.676281	1.3259	0.8285	HEY1
NCAM1 interactions	1/44	2.27	0.535342	0.676281	1.3259	0.8285	PRNP
Amino sugar and nucleotide sugar metabolism	1/45	2.22	0.543375	0.679218	1.2957	0.7903	CYB5R1
RNA polymerase III transcription	1/45	2.22	0.543375	0.679218	1.2957	0.7903	BRF2
Defensins	1/45	2.22	0.543375	0.679218	1.2957	0.7903	PRSS3
Interleukin-3 signaling pathway	1/45	2.22	0.543375	0.679218	1.2957	0.7903	CXCL8
Interleukin-3, interleukin-5, and GM-CSF signaling	1/45	2.22	0.543375	0.679218	1.2957	0.7903	CSF2
ERBB1 downstream pathway	2/106	1.89	0.548345	0.683994	1.0962	0.6586	EGR1;SH2D2A
Syndecan 1 pathway	1/46	2.17	0.551269	0.686203	1.2668	0.7544	MMP1
Regulation of transcription by NOTCH1 intracellular domain	1/47	2.13	0.559027	0.692961	1.2392	0.7207	HEY1
LKB1 signaling events	1/47	2.13	0.559027	0.692961	1.2392	0.7207	MAP2
Activation of chaperones by IRE1 alpha	1/48	2.08	0.566652	0.696607	1.2128	0.6889	TSPYL2
Post-translational regulation of adherens junction stability and disassembly	1/48	2.08	0.566652	0.696607	1.2128	0.6889	MMP3
Diurnally regulated genes with circadian orthologs	1/48	2.08	0.566652	0.696607	1.2128	0.6889	GSTM3
HES/HEY pathway	1/48	2.08	0.566652	0.696607	1.2128	0.6889	HEY1
Glycosaminoglycan metabolism	2/110	1.82	0.568458	0.697387	1.0553	0.5961	CHPF2;B3GAT3
Focal adhesion	4/233	1.72	0.573158	0.698602	0.9951	0.5539	STYK1;SPP1;PGF;BIRC3
Angiopoietin receptor Tie2-mediated signaling	1/49	2.04	0.574145	0.698602	1.1874	0.6589	ANGPT1
FoxO family signaling	1/49	2.04	0.574145	0.698602	1.1874	0.6589	SOD2
Muscle contraction	1/49	2.04	0.574145	0.698602	1.1874	0.6589	TMOD1
Type I interferon (interferon-alpha/beta) pathway	1/51	1.96	0.588746	0.71345	1.1398	0.6038	PTPRR
Metabolism of vitamins and cofactors	1/51	1.96	0.588746	0.71345	1.1398	0.6038	NMNAT1
Heparan sulfate/heparin glycosaminoglycan (HS-GAG) metabolism	1/52	1.92	0.595859	0.71914	1.1174	0.5785	B3GAT3
Mitochondrial protein import	1/52	1.92	0.595859	0.71914	1.1174	0.5785	HSCB
Androgen receptor regulation of biosynthesis and transcription	1/53	1.89	0.602848	0.724636	1.0959	0.5546	EGR1
Thrombin signaling through protease-activated receptors	1/53	1.89	0.602848	0.724636	1.0959	0.5546	GNA15
Arginine and proline metabolism	1/54	1.85	0.609717	0.729943	1.0751	0.5319	SAT1
Kit receptor signaling pathway	1/54	1.85	0.609717	0.729943	1.0751	0.5319	JUNB
Signaling by NOTCH	2/119	1.68	0.611317	0.730389	0.9737	0.4792	HEY1;DTX2
T cell receptor signaling in naive CD8+ T cells	1/55	1.82	0.616468	0.733597	1.0552	0.5104	MAP3K14
TAp63 pathway	1/55	1.82	0.616468	0.733597	1.0552	0.5104	NQO1
Signaling by PDGF	2/122	1.64	0.624865	0.742105	0.9492	0.4463	SPP1;TRIB3
Mechanism of gene regulation by peroxisome proliferators via PPAR-alpha	1/57	1.75	0.629622	0.744781	1.0174	0.4707	NFKBIA
PI3K cascade	1/57	1.75	0.629622	0.744781	1.0174	0.4707	TRIB3
Arachidonic acid metabolism	1/58	1.72	0.636029	0.749381	0.9995	0.4523	AKR1C3
Tryptophan metabolism	1/58	1.72	0.636029	0.749381	0.9995	0.4523	KYNU
Integration of energy metabolism	2/125	1.6	0.638045	0.75027	0.9259	0.4161	GNA15;TALDO1
Spliceosome	2/127	1.57	0.646628	0.758863	0.911	0.3972	HSPA6;HSPA1B
Neurotrophic factor-mediated Trk receptor signaling	1/60	1.67	0.648514	0.759228	0.9655	0.4181	SQSTM1
Androgen receptor proteolysis and transcription regulation	1/61	1.64	0.654595	0.759228	0.9494	0.4023	PRDX1
Clathrin derived vesicle budding	1/61	1.64	0.654595	0.759228	0.9494	0.4023	FTL
FGF signaling pathway	1/61	1.64	0.654595	0.759228	0.9494	0.4023	SPP1
Leptin signaling pathway	1/61	1.64	0.654595	0.759228	0.9494	0.4023	IL1B
Licensing factor removal from origins	1/61	1.64	0.654595	0.759228	0.9494	0.4023	NQO1
Circadian rhythm	1/62	1.61	0.660572	0.763185	0.9338	0.3872	SERPINE1
Colorectal cancer	1/62	1.61	0.660572	0.763185	0.9338	0.3872	TGFB2
Proteasome degradation	1/63	1.59	0.666445	0.768478	0.9187	0.3728	UCHL1
Angiotensin II-stimulated signaling through G-proteins and beta-arrestin	1/64	1.56	0.672217	0.772141	0.904	0.3591	EGR1
MAPK cascade role in angiogenesis	1/64	1.56	0.672217	0.772141	0.904	0.3591	ANGPT1
Endocytosis	3/201	1.49	0.676828	0.775662	0.862	0.3365	TGFB2;HSPA6;HSPA1B
ERK1/ERK2 MAPK pathway	1/65	1.54	0.677889	0.775662	0.8899	0.3459	PTPRR
Beta-1 integrin cell surface interactions	1/66	1.52	0.683464	0.779044	0.8761	0.3334	SPP1
Destabilization of mRNA by AUF1 (hnRNP D0)	1/66	1.52	0.683464	0.779044	0.8761	0.3334	HSPB1
T cell receptor signaling in naive CD4+ T cells	1/67	1.49	0.688942	0.783119	0.8628	0.3215	MAP3K14
Phospholipid metabolism	3/205	1.46	0.689671	0.783119	0.8448	0.3139	GBA;PLA2G4C;GLA
AMPK signaling	1/68	1.47	0.694326	0.785912	0.8499	0.31	CPT1C
Systemic lupus erythematosus	2/139	1.44	0.694772	0.785912	0.8307	0.3025	C3;C1S
NFAT involvement in hypertrophy of the heart	1/69	1.45	0.699617	0.789766	0.8373	0.2991	HBEGF
Antiviral mechanism by interferon-stimulated genes	1/70	1.43	0.704816	0.789766	0.8252	0.2887	HERC5
Signaling events mediated by VEGFR1 and VEGFR2	1/70	1.43	0.704816	0.789766	0.8252	0.2887	SH2D2A
Long-term potentiation	1/70	1.43	0.704816	0.789766	0.8252	0.2887	ATF4
NCAM signaling for neurite out-growth	1/70	1.43	0.704816	0.789766	0.8252	0.2887	PRNP
Phase II of biological oxidations: conjugation	1/71	1.41	0.709926	0.792507	0.8133	0.2786	GCLM
Rac1 cell motility signaling pathway	1/71	1.41	0.709926	0.792507	0.8133	0.2786	NCF2
Myc repressed pathway	1/73	1.37	0.719883	0.802116	0.7907	0.2599	DDIT3
E2F transcription factor network	1/74	1.35	0.724732	0.804507	0.7798	0.2511	SERPINE1
Integrins in angiogenesis	1/74	1.35	0.724732	0.804507	0.7798	0.2511	SPP1
Glycolysis and gluconeogenesis	1/75	1.33	0.729498	0.808289	0.7692	0.2426	GALM
Signaling by NGF	3/221	1.36	0.737213	0.815319	0.7821	0.2384	NFKBIA;TRIB3;SQSTM1
Transcriptional regulation of white adipocyte differentiation	1/77	1.3	0.738785	0.815542	0.7489	0.2267	ANGPTL4
Integrated breast cancer pathway	2/152	1.32	0.740689	0.815993	0.7582	0.2276	MMP1;BID
Phosphatidylinositol signaling system	1/78	1.28	0.743308	0.815993	0.7391	0.2193	DGKG
Signaling by SCF-KIT	1/78	1.28	0.743308	0.815993	0.7391	0.2193	TRIB3
Signaling events mediated by hepatocyte growth factor receptor (c-Met)	1/79	1.27	0.747753	0.816355	0.7296	0.2121	EGR1
Fc epsilon receptor I signaling pathway	1/79	1.27	0.747753	0.816355	0.7296	0.2121	CSF2
Glycerophospholipid metabolism	1/79	1.27	0.747753	0.816355	0.7296	0.2121	DGKG
Nuclear beta-catenin signaling and target gene transcription regulation	1/80	1.25	0.752122	0.81962	0.7203	0.2052	CXCL8
ATM-dependent DNA damage response	1/82	1.22	0.760634	0.82738	0.7025	0.1922	SOD2
Cell junction organization	1/84	1.19	0.768854	0.833276	0.6855	0.1802	CLDN1
ECM-receptor interaction	1/84	1.19	0.768854	0.833276	0.6855	0.1802	SPP1
MicroRNAs in cardiomyocyte hypertrophy	1/85	1.18	0.772858	0.834219	0.6773	0.1745	MAP3K14
Myc active pathway	1/85	1.18	0.772858	0.834219	0.6773	0.1745	MYCT1
Carbohydrate metabolism	3/235	1.28	0.773931	0.834219	0.7344	0.1882	CHPF2;B3GAT3;TALDO1
mRNA stability regulation by proteins that bind AU-rich elements	1/86	1.16	0.776793	0.834281	0.6693	0.169	HSPB1
Glycerophospholipid biosynthesis	1/86	1.16	0.776793	0.834281	0.6693	0.169	PLA2G4C
Mitotic G2-G2/M phases	1/87	1.15	0.78066	0.836924	0.6615	0.1638	TUBA4A
Androgen receptor signaling, proteolysis, and transcription regulation	1/88	1.14	0.78446	0.839485	0.6538	0.1587	PRDX1
Alzheimer's disease	2/169	1.18	0.79173	0.844372	0.6804	0.1589	IL1B;BID
Gap junction pathway	1/90	1.11	0.791865	0.844372	0.6391	0.1491	TUBA4A
Neural crest differentiation	1/91	1.1	0.795471	0.8467	0.6319	0.1446	NFKB2
L1CAM interactions	1/94	1.06	0.805921	0.855283	0.6115	0.1319	NRCAM
RNA polymerase I, RNA polymerase III, and mitochondrial transcription	1/95	1.05	0.809285	0.855283	0.6049	0.128	BRF2
Class B GPCRs (secretin family receptors)	1/95	1.05	0.809285	0.855283	0.6049	0.128	ADM
G-protein signaling pathways	1/95	1.05	0.809285	0.855283	0.6049	0.128	GNA15
Antigen presentation: folding, assembly, and peptide loading of class I MHC proteins	3/255	1.18	0.819	0.864016	0.6754	0.1349	NCF2;FBXO6;CTSS
Granule cell survival pathway	1/99	1.01	0.822168	0.865823	0.5801	0.1136	CXCL2
Pyrimidine metabolism	1/100	1	0.825251	0.867534	0.5742	0.1103	TXNRD1
Pancreatic secretion	1/101	0.99	0.82828	0.869183	0.5685	0.1071	PRSS3
G alpha i pathway	1/108	0.93	0.84807	0.888383	0.5311	0.0875	HBEGF
Post-translational protein modification	2/196	1.02	0.854693	0.893376	0.5849	0.0918	GCNT3;ST6GALNAC4
Signaling by EGFR in cancer	1/111	0.9	0.855839	0.893376	0.5165	0.0804	TRIB3
Protein metabolism	5/442	1.13	0.881663	0.918661	0.6467	0.0815	GCNT3;FBXO6;HSCB;ST6GALNAC4;TUBA4A
Rho GTPase cycle	1/123	0.81	0.88315	0.918661	0.4654	0.0578	ARHGAP25
G alpha (s) signaling events	1/125	0.8	0.887171	0.921233	0.4579	0.0548	ADM
Signaling by FGFR in disease	1/128	0.78	0.892945	0.925614	0.447	0.0506	TRIB3
Cell-cell communication	1/129	0.78	0.894804	0.925928	0.4435	0.0493	CLDN1
Parkinson's disease	1/131	0.76	0.898425	0.928061	0.4366	0.0468	UCHL1
Tight junction	1/133	0.75	0.901922	0.928449	0.4299	0.0444	CLDN1
Membrane trafficking	1/133	0.75	0.901922	0.928449	0.4299	0.0444	FTL
Ubiquitin-mediated proteolysis	1/136	0.74	0.906943	0.930399	0.4203	0.0411	BIRC3
NGF signaling via TRKA from the plasma membrane	1/136	0.74	0.906943	0.930399	0.4203	0.0411	TRIB3
Adrenergic pathway	1/137	0.73	0.90856	0.930453	0.4172	0.04	GNA15
Biological oxidations	1/139	0.72	0.911709	0.932073	0.4111	0.038	GCLM
EGF/EGFR signaling pathway	1/141	0.71	0.914749	0.933578	0.4052	0.0361	SH2D2A
Signaling by GPCR	12/977	1.23	0.91722	0.934496	0.6979	0.0603	C3;DGKG;GNA15;CXCL8;CCL20;MMP3;ADM;CXCL1;CXCL3;CXCL2;CXCL5;HBEGF
Neuroactive ligand-receptor interaction	2/272	0.74	0.950244	0.966487	0.4186	0.0214	CHRNE;PRSS3
Calcium signaling pathway	1/178	0.56	0.955451	0.969138	0.3199	0.0146	GNA15
Neuronal system	2/283	0.71	0.957629	0.969138	0.402	0.0174	CHRNE;VAMP1
Transcription	1/181	0.55	0.957737	0.969138	0.3145	0.0136	BRF2
Huntington's disease	1/184	0.54	0.959906	0.969684	0.3093	0.0127	SOD2
Transmission across chemical synapses	1/190	0.53	0.963916	0.972085	0.2994	0.011	CHRNE
Developmental biology	3/420	0.71	0.977228	0.982239	0.4047	0.0093	PRNP;NRCAM;ANGPTL4
Axon guidance	2/325	0.62	0.977287	0.982239	0.349	0.008	PRNP;NRCAM
Cell cycle	3/453	0.66	0.985502	0.988826	0.3744	0.0055	TGFB2;GADD45B;TUBA4A
Generic transcription pathway	2/377	0.53	0.989699	0.991365	0.2998	0.0031	SERPINE1;JUNB
Gene expression	4/968	0.41	0.999961	0.999961	0.2274	0	BRF2;SERPINE1;HSPB1;JUNB

## Sheet: GO_BioProcess_UP
GO Biological Process 2025 | Upregulated DEGs | Sorted by Adjusted P-value | Bold = shown in figure
Top 20 sig. → orange | Other sig. → yellow | Bold = in figure (3) | Significant (adj.p<0.05): 15/1738
Term	Overlap	Overlap (%)	P-value	Adjusted P-value	Odds Ratio	Combined Score	Genes
Cellular Response to Lipopolysaccharide (GO:0071222)	12/125	9.6	1.76407e-06	0.00306595	6.232	82.5609	IL6;CXCL8;IRAK2;IL1B;TNIP3;SERPINE1;ZC3H12A;MMP3;ANKRD1;CASP1;CXCL5;NFKBIB
Negative Regulation of Ferroptosis (GO:0110076)	4/8	50	5.76676e-06	0.00501131	57.6276	695.184	NQO1;HMOX1;SLC7A11;SQSTM1
Cellular Response to Molecule of Bacterial Origin (GO:0071219)	11/123	8.94	9.4618e-06	0.00548154	5.7467	66.4794	IL6;CXCL8;IL1B;TNIP3;SERPINE1;ZC3H12A;MMP3;ANKRD1;CASP1;CXCL5;NFKBIB
Regulation of Ferroptosis (GO:0110075)	4/11	36.36	2.60919e-05	0.0113369	32.925	347.487	NQO1;HMOX1;SLC7A11;SQSTM1
Cytokine-Mediated Signaling Pathway (GO:0019221)	15/255	5.88	3.96329e-05	0.0126862	3.6771	37.2704	EGR1;CSF3;CSF2;IL20RB;TRAF1;EREG;OASL;NFKBIA;IL6;IRAK2;IL1B;IL13RA2;IL7R;CCL26;BIRC3
Cellular Response to Oxidative Stress (GO:0034599)	10/121	8.26	4.7607e-05	0.0126862	5.2559	52.3093	NQO1;BRF2;SRXN1;SESN2;ZC3H12A;MMP3;GSR;SOD2;HSPA1B;ATF4
Cellular Response to Interleukin-1 (GO:0071347)	7/57	12.28	5.39029e-05	0.0126862	8.1204	79.8101	NFKBIA;EGR1;CXCL8;IRAK2;IL1B;ZC3H12A;ANKRD1
Cellular Response to Chemical Stress (GO:0062197)	9/100	9	5.83944e-05	0.0126862	5.7586	56.1368	NQO1;BRF2;SRXN1;SESN2;ZC3H12A;GSR;SOD2;HSPA1B;ATF4
Response to Unfolded Protein (GO:0006986)	6/44	13.64	0.000102433	0.019781	9.1369	83.9346	HSPB8;DNAJB4;DDIT3;HSPA4L;HSPA6;HSPB1
Response to Lipopolysaccharide (GO:0032496)	11/161	6.83	0.000114381	0.0198795	4.2825	38.8682	IL6;CXCL8;IL1B;TNIP3;SERPINE1;ZC3H12A;MMP3;ANKRD1;CASP1;CXCL5;NFKBIB
Cellular Response to Lipid (GO:0071396)	13/234	5.56	0.000226223	0.0357432	3.4433	28.903	CXCL8;SERPINE1;MMP3;AKR1C3;CXCL5;IL6;IL1B;TNIP3;ZC3H12A;ANKRD1;CASP1;HSPA1B;NFKBIB
Canonical NF-kappaB Signal Transduction (GO:0007249)	5/36	13.89	0.000360414	0.0478348	9.3093	73.8065	NFKBIA;IRAK2;RELB;NFKB2;BIRC3
Positive Regulation of Apoptotic Process (GO:0043065)	15/313	4.79	0.000378475	0.0478348	2.9526	23.2643	SLC48A1;PRNP;TGFB2;GADD45B;AKR1C3;MLLT11;IL6;DDIT3;ZC3H12A;ANKRD1;MAP3K10;NUPR1;BID;SQSTM1;ATF4
Serine Family Amino Acid Biosynthetic Process (GO:0009070)	3/9	33.33	0.000395679	0.0478348	28.7266	225.07	PSAT1;SEPHS2;PSPH
Regulation of Neuroinflammatory Response (GO:0150077)	4/21	19.05	0.000412843	0.0478348	13.5505	105.591	IL6;IL1B;MMP3;NUPR1
Positive Regulation of Neuron Apoptotic Process (GO:0043525)	5/39	12.82	0.000527653	0.0538821	8.4866	64.0489	PRNP;TGFB2;DDIT3;NUPR1;ATF4
L-serine Metabolic Process (GO:0006563)	3/10	30	0.000558043	0.0538821	24.6216	184.442	PSAT1;SDSL;PSPH
Cellular Response to UV-A (GO:0071492)	3/10	30	0.000558043	0.0538821	24.6216	184.442	MMP1;MMP3;TIMP1
Positive Regulation of Vasculature Development (GO:1904018)	8/109	7.34	0.000605761	0.0554112	4.5959	34.0514	CXCL8;IL1B;SERPINE1;ZC3H12A;HMOX1;HSPB1;ANGPTL4;CD34
Regulation of Lipid Storage (GO:0010883)	4/24	16.67	0.000703678	0.0611496	11.5161	83.5978	C3;NFKBIA;IL6;ZC3H12A
Non-Canonical NF-kappaB Signal Transduction (GO:0038061)	4/25	16	0.00082641	0.0683953	10.9672	77.8497	NFKBIA;MAP3K14;RELB;BIRC3
Antimicrobial Humoral Immune Response Mediated by Antimicrobial Peptide (GO:0061844)	8/116	6.9	0.000913149	0.0721388	4.2965	30.0696	SLC48A1;CXCL8;CCL20;CXCL1;CXCL3;CXCL2;CXCL5;CCL26
Positive Regulation of Neuroinflammatory Response (GO:0150078)	3/12	25	0.000997167	0.0753511	19.1481	132.325	IL6;IL1B;NUPR1
Antimicrobial Humoral Response (GO:0019730)	9/147	6.12	0.00104334	0.0755551	3.7882	26.0075	SLC48A1;CXCL8;CCL20;CXCL1;PRSS3;CXCL3;CXCL2;CXCL5;CCL26
Regulation of Angiogenesis (GO:0045765)	11/211	5.21	0.00114011	0.0792602	3.2037	21.7101	SLC48A1;TGFB2;IL6;CXCL8;IL1B;SERPINE1;ZC3H12A;HMOX1;HSPB1;ANGPTL4;CD34
Removal of Superoxide Radicals (GO:0019430)	3/13	23.08	0.00127982	0.0823823	17.2325	114.786	NQO1;PRDX1;SOD2
Response to UV-A (GO:0070141)	3/13	23.08	0.00127982	0.0823823	17.2325	114.786	MMP1;MMP3;TIMP1
Negative Regulation of Extrinsic Apoptotic Signaling Pathway (GO:2001237)	6/72	8.33	0.00151403	0.0878891	5.2532	34.1086	CSF2;IL1B;SERPINE1;HMOX1;HSPA1B;ICAM1
Positive Regulation of Epithelial to Mesenchymal Transition (GO:0010718)	5/49	10.2	0.00151844	0.0878891	6.5545	42.539	TGFB2;IL6;BAMBI;IL1B;GCNT2
Positive Regulation of Angiogenesis (GO:0045766)	8/126	6.35	0.00155693	0.0878891	3.9304	25.4101	CXCL8;IL1B;SERPINE1;ZC3H12A;HMOX1;HSPB1;ANGPTL4;CD34
Cellular Response to Superoxide (GO:0071451)	3/14	21.43	0.00160814	0.0878891	15.6651	100.768	NQO1;PRDX1;SOD2
Cellular Response to Cytokine Stimulus (GO:0071345)	13/289	4.5	0.00161821	0.0878891	2.7493	17.6684	EGR1;CSF3;CSF2;CXCL8;IL20RB;EREG;IL6;IL1B;ZC3H12A;ANKRD1;CASP1;IL13RA2;IL7R
Intrinsic Apoptotic Signaling Pathway in Response to Endoplasmic Reticulum Stress (GO:0070059)	4/30	13.33	0.00167298	0.0881105	8.8559	56.6168	DDIT3;TRIB3;CHAC1;ATF4
Collagen Catabolic Process (GO:0030574)	4/31	12.9	0.00189501	0.0968684	8.5274	53.4544	MMP1;MMP3;CTSS;MMP10
Inflammatory Response (GO:0006954)	12/261	4.6	0.00201648	0.100133	2.8085	17.4306	IL6;VNN1;CXCL8;TNFAIP6;IRAK2;IL1B;PLA2G4C;CASP1;ADM;CXCL5;RELB;CCL26
Negative Regulation of Protein Processing (GO:0010955)	3/16	18.75	0.00241161	0.116138	13.2537	79.8862	PRNP;SERPINE1;CHAC1
Integrated Stress Response Signaling (GO:0140467)	4/34	11.76	0.00268202	0.116138	7.6735	45.4363	HERC5;BATF2;DDIT3;ATF4
Positive Regulation of Interleukin-1 Beta Production (GO:0032731)	5/56	8.93	0.00275772	0.116138	5.6528	33.3141	EGR1;IL6;CASP1;HSPB1;TRIM16
Cellular Heat Acclimation (GO:0070370)	2/5	40	0.00286662	0.116138	38.1963	223.625	HSPA6;HSPA1B
Heat Acclimation (GO:0010286)	2/5	40	0.00286662	0.116138	38.1963	223.625	HSPA6;HSPA1B
Inflammatory Response to Wounding (GO:0090594)	2/5	40	0.00286662	0.116138	38.1963	223.625	IL6;HMOX1
Regulation of D-glucose Transmembrane Transport (GO:0010827)	3/17	17.65	0.00289124	0.116138	12.3064	71.944	C3;IL1B;TRIB3
Cellular Response to Oxygen-Containing Compound (GO:1901701)	15/384	3.91	0.0029033	0.116138	2.3757	13.8787	EGR1;PRNP;CXCL8;SERPINE1;MMP3;CXCL5;ICAM1;IL6;IL1B;TNIP3;ZC3H12A;SESN2;ANKRD1;CASP1;NFKBIB
Regulation of Interleukin-1 Beta Production (GO:0032651)	6/82	7.32	0.0029402	0.116138	4.5596	26.5793	EGR1;IL6;ZC3H12A;CASP1;HSPB1;TRIM16
Neutral Amino Acid Transport (GO:0015804)	4/36	11.11	0.00331586	0.128066	7.1932	41.0661	SLC6A6;SLC3A2;SLC1A5;SLC7A11
Response to Interleukin-1 (GO:0070555)	5/59	8.47	0.003466	0.130955	5.338	30.2382	CXCL8;IRAK2;IL1B;ZC3H12A;ANKRD1
Superoxide Metabolic Process (GO:0006801)	4/37	10.81	0.00366798	0.135637	6.9749	39.1158	NQO1;NCF2;PRDX1;SOD2
Positive Regulation of Inflammatory Response (GO:0050729)	7/115	6.09	0.00382144	0.138368	3.7483	20.8674	NFKBIA;IL6;IL1B;SERPINE1;NFKBIZ;CASP1;NUPR1
Cellular Response to Tumor Necrosis Factor (GO:0071356)	6/87	6.9	0.00394772	0.140023	4.2771	23.6719	NFKBIA;CXCL8;ZC3H12A;ANKRD1;TRAF1;BIRC3
HRI-mediated Signaling (GO:0140468)	2/6	33.33	0.00425097	0.142249	28.6458	156.423	DDIT3;ATF4
Regulation of Cell Adhesion Molecule Production (GO:0060353)	2/6	33.33	0.00425097	0.142249	28.6458	156.423	CXCL8;IL1B
Positive Regulation of Cytokine Production (GO:0001819)	13/325	4	0.00443412	0.142249	2.4276	13.1537	IL32;EGR1;CSF2;SERPINE1;EREG;C3;IL6;DDIT3;IL1B;CASP1;HMOX1;HSPA1B;ATF4
Positive Regulation of Intrinsic Apoptotic Signaling Pathway (GO:2001244)	4/39	10.26	0.00444657	0.142249	6.5756	35.6111	VNN1;DDIT3;NUPR1;BID
Positive Regulation of Interleukin-1 Production (GO:0032732)	5/63	7.94	0.00460211	0.142249	4.9688	26.7384	EGR1;IL6;CASP1;HSPB1;TRIM16
Positive Regulation of Interleukin-8 Production (GO:0032757)	5/63	7.94	0.00460211	0.142249	4.9688	26.7384	IL6;DDIT3;IL1B;SERPINE1;HSPA1B
Positive Regulation of Cell Population Proliferation (GO:0008284)	17/484	3.51	0.00464549	0.142249	2.1296	11.4396	CSF3;TGFB2;CSF2;AKR1C3;PGF;CXCL5;EREG;IL6;SERTAD1;BAMBI;IL1B;GCNT2;HMOX1;TIMP1;IL13RA2;IL7R;HBEGF
Interleukin-1-Mediated Signaling Pathway (GO:0070498)	3/20	15	0.00466526	0.142249	10.1331	54.3907	NFKBIA;IRAK2;IL1B
Granulocyte Chemotaxis (GO:0071621)	5/64	7.81	0.00492305	0.147522	4.8843	25.9546	TGFB2;CXCL8;CXCL3;CXCL5;CCL26
Negative Regulation of Cell Growth (GO:0030308)	7/121	5.79	0.00504781	0.148696	3.55	18.775	TSPYL2;SLC48A1;CDKL3;TGFB2;SESN2;OSGIN1;HSPA1B
Regulation of Oxidative Stress-Induced Intrinsic Apoptotic Signaling Pathway (GO:1902175)	3/21	14.29	0.00537399	0.155667	9.5697	50.0129	VNN1;HSPB1;SOD2
Sulfur Amino Acid Transport (GO:0000101)	2/7	28.57	0.00588371	0.161098	22.9155	117.684	SLC3A2;SLC7A11
Neurotrophin TRK Receptor Signaling Pathway (GO:0048011)	2/7	28.57	0.00588371	0.161098	22.9155	117.684	ZFYVE27;DDIT4
Nonribosomal Peptide Biosynthetic Process (GO:0019184)	2/7	28.57	0.00588371	0.161098	22.9155	117.684	CHAC1;GCLM
Positive Regulation of Cellular Process (GO:0048522)	20/622	3.22	0.00593228	0.161098	1.9477	9.9863	CSF3;TGFB2;CSF2;AKR1C3;PGF;CXCL5;EREG;C3;SLC6A6;IL6;SERTAD1;BAMBI;IL1B;ZC3H12A;GCNT2;TIMP1;NUPR1;IL13RA2;IL7R;HBEGF
Positive Regulation of p38MAPK Cascade (GO:1900745)	3/22	13.64	0.00614393	0.164	9.0656	46.1645	GADD45B;IL1B;ZC3H12A
Regulation of Peptidyl-Tyrosine Phosphorylation (GO:0050730)	4/43	9.3	0.00632222	0.164	5.9	29.8757	SLC48A1;IL6;ANGPT1;ENPP2
Neutrophil Chemotaxis (GO:0030593)	4/43	9.3	0.00632222	0.164	5.9	29.8757	TGFB2;CXCL8;CXCL3;CXCL5
Negative Regulation of Oxidative Stress-Induced Intrinsic Apoptotic Signaling Pathway (GO:1902176)	3/23	13.04	0.00697636	0.164847	8.6118	42.7598	HSPB1;SOD2;ATF4
Prostanoid Metabolic Process (GO:0006692)	3/23	13.04	0.00697636	0.164847	8.6118	42.7598	AKR1C1;AKR1C3;PTGR1
Regulation of Neuron Apoptotic Process (GO:0043523)	7/129	5.43	0.00711627	0.164847	3.3158	16.3979	EGR1;PRNP;TGFB2;DDIT3;NUPR1;SOD2;ATF4
Extracellular Matrix Disassembly (GO:0022617)	4/45	8.89	0.00743071	0.164847	5.6116	27.5089	MMP1;MMP3;CTSS;MMP10
Positive Regulation of Response to External Stimulus (GO:0032103)	8/163	4.91	0.00746526	0.164847	2.9865	14.6264	NFKBIA;SLC48A1;IL1B;SERPINE1;NFKBIZ;CASP1;EREG;CCL26
Regulation of Canonical NF-kappaB Signal Transduction (GO:0043122)	11/270	4.07	0.00747675	0.164847	2.4664	12.0753	NFKBIA;IRAK2;IL1B;TNIP3;ZC3H12A;CASP1;HMOX1;HSPB1;TRAF1;SQSTM1;BIRC3
Regulation of Cell Population Proliferation (GO:0042127)	23/769	2.99	0.00771619	0.164847	1.8105	8.8071	SLC48A1;CSF3;TGFB2;CSF2;CXCL8;TNFRSF9;AKR1C3;CXCL1;SOD2;PGF;CXCL5;EREG;IL6;SERTAD1;BAMBI;IL1B;GCNT2;TIMP1;NUPR1;IL13RA2;IL7R;HSPA1B;HBEGF
Regulation of Glial Cell Proliferation (GO:0060251)	2/8	25	0.00775588	0.164847	19.0952	92.7896	IL6;IL1B
NAD Biosynthetic Process (GO:0009435)	2/8	25	0.00775588	0.164847	19.0952	92.7896	NMNAT1;KYNU
Aminoglycoside Antibiotic Metabolic Process (GO:0030647)	2/8	25	0.00775588	0.164847	19.0952	92.7896	AKR1C1;AKR1C3
Daunorubicin Metabolic Process (GO:0044597)	2/8	25	0.00775588	0.164847	19.0952	92.7896	AKR1C1;AKR1C3
Nicotinamide Nucleotide Biosynthetic Process (GO:0019359)	2/8	25	0.00775588	0.164847	19.0952	92.7896	NMNAT1;KYNU
Regulation of Cell Killing (GO:0031341)	2/8	25	0.00775588	0.164847	19.0952	92.7896	TGFB2;ICAM1
Negative Regulation of Extrinsic Apoptotic Signaling Pathway in Absence of Ligand (GO:2001240)	3/24	12.5	0.00787246	0.164847	8.2013	39.7304	CSF2;IL1B;HSPA1B
Negative Regulation of Extrinsic Apoptotic Signaling Pathway via Death Domain Receptors (GO:1902042)	3/24	12.5	0.00787246	0.164847	8.2013	39.7304	SERPINE1;HMOX1;ICAM1
Negative Regulation of Signal Transduction in Absence of Ligand (GO:1901099)	3/24	12.5	0.00787246	0.164847	8.2013	39.7304	CSF2;IL1B;HSPA1B
Regulation of Intrinsic Apoptotic Signaling Pathway (GO:2001242)	4/46	8.7	0.00802998	0.166144	5.4777	26.4277	DDIT3;PPIF;NUPR1;BID
Chaperone Cofactor-Dependent Protein Refolding (GO:0051085)	3/25	12	0.00883328	0.175007	7.8281	37.0211	DNAJB4;HSPA6;HSPA1B
Glycosaminoglycan Biosynthetic Process (GO:0006024)	3/25	12	0.00883328	0.175007	7.8281	37.0211	B3GAT3;IL1B;GCNT2
Intracellular Signaling Cassette (GO:0141124)	13/354	3.67	0.00884684	0.175007	2.2178	10.4851	BATF2;CXCL8;RRAD;CCL20;RELB;NFKB2;NFKBIA;GNA15;IRAK2;DDIT3;MAP3K14;ATF4;BIRC3
Positive Regulation of Macromolecule Biosynthetic Process (GO:0010557)	13/355	3.66	0.00904492	0.175007	2.2112	10.4049	IL32;EGR1;TGFB2;CSF2;CXCL8;ANGPT1;IL6;DNAJA4;IL1B;ZC3H12A;CD34;HSPA1B;ATF4
Regulation of Protein Phosphorylation (GO:0001932)	7/137	5.11	0.00975514	0.175007	3.1105	14.4015	TSPYL2;C3;SLC48A1;LIMCH1;SESN2;ZC3H12A;HSPB1
Regulation of Ketone Biosynthetic Process (GO:0010566)	2/9	22.22	0.00985881	0.175007	16.3665	75.6033	EGR1;AKR1C3
Doxorubicin Metabolic Process (GO:0044598)	2/9	22.22	0.00985881	0.175007	16.3665	75.6033	AKR1C1;AKR1C3
Myeloid Dendritic Cell Differentiation (GO:0043011)	2/9	22.22	0.00985881	0.175007	16.3665	75.6033	BATF2;CSF2
Negative Regulation of Cell Adhesion Mediated by Integrin (GO:0033629)	2/9	22.22	0.00985881	0.175007	16.3665	75.6033	SLC48A1;SERPINE1
Polyketide Metabolic Process (GO:0030638)	2/9	22.22	0.00985881	0.175007	16.3665	75.6033	AKR1C1;AKR1C3
Carboxylic Acid Transport (GO:0046942)	4/49	8.16	0.0100153	0.175007	5.1118	23.5327	SLC6A6;SLC13A3;SLC3A2;SLC1A5
Cellular Component Disassembly (GO:0022411)	4/49	8.16	0.0100153	0.175007	5.1118	23.5327	MMP1;MMP3;CTSS;MMP10
Regulation of Wound Healing (GO:0061041)	4/49	8.16	0.0100153	0.175007	5.1118	23.5327	SLC48A1;SERPINE1;CLDN1;HBEGF
Neutrophil Migration (GO:1990266)	4/50	8	0.0107415	0.175007	5.0004	22.6699	TGFB2;CXCL8;CXCL3;CXCL5
Glycerophospholipid Catabolic Process (GO:0046475)	3/27	11.11	0.0109528	0.175007	7.1751	32.3894	PLA2G4C;GDPD1;ENPP2
Positive Regulation of Vascular Endothelial Growth Factor Production (GO:0010575)	3/27	11.11	0.0109528	0.175007	7.1751	32.3894	C3;IL6;IL1B
Cellular Response to Starvation (GO:0009267)	7/141	4.96	0.011314	0.175007	3.017	13.5214	GABARAPL1;SESN2;ZC3H12A;TBC1D7;MAP1LC3B2;ASNS;ATF4
Regulation of Extrinsic Apoptotic Signaling Pathway in Absence of Ligand (GO:2001239)	3/28	10.71	0.012113	0.175007	6.8877	30.3988	CSF2;IL1B;HSPA1B
Amino Acid Import Across Plasma Membrane (GO:0089718)	3/28	10.71	0.012113	0.175007	6.8877	30.3988	SLC6A6;SLC3A2;SLC1A5
Toll-Like Receptor 4 Signaling Pathway (GO:0034142)	3/28	10.71	0.012113	0.175007	6.8877	30.3988	NFKBIA;IRAK2;TNIP3
Glycosaminoglycan Metabolic Process (GO:0030203)	3/28	10.71	0.012113	0.175007	6.8877	30.3988	TNFAIP6;B3GAT3;GCNT2
Negative Regulation of Type II Interferon Production (GO:0032689)	3/28	10.71	0.012113	0.175007	6.8877	30.3988	PRNP;DDIT3;ZC3H12A
Phospholipid Catabolic Process (GO:0009395)	3/28	10.71	0.012113	0.175007	6.8877	30.3988	PLA2G4C;GDPD1;ENPP2
Regulation of Inclusion Body Assembly (GO:0090083)	2/10	20	0.012184	0.175007	14.32	63.1172	DNAJA4;HSPA1B
Cellular Response to Nitrogen Levels (GO:0043562)	2/10	20	0.012184	0.175007	14.32	63.1172	GABARAPL1;MAP1LC3B2
Cellular Response to Nitrogen Starvation (GO:0006995)	2/10	20	0.012184	0.175007	14.32	63.1172	GABARAPL1;MAP1LC3B2
Response to Corticosteroid (GO:0031960)	2/10	20	0.012184	0.175007	14.32	63.1172	IL6;AKR1C3
Serine Family Amino Acid Metabolic Process (GO:0009069)	2/10	20	0.012184	0.175007	14.32	63.1172	SEPHS2;PSPH
Heme Catabolic Process (GO:0042167)	2/10	20	0.012184	0.175007	14.32	63.1172	ABCC2;HMOX1
Induction of Positive Chemotaxis (GO:0050930)	2/10	20	0.012184	0.175007	14.32	63.1172	CXCL8;PGF
Negative Regulation of Lipid Localization (GO:1905953)	2/10	20	0.012184	0.175007	14.32	63.1172	NFKBIA;IL6
Negative Regulation of Programmed Necrotic Cell Death (GO:0062099)	2/10	20	0.012184	0.175007	14.32	63.1172	NUPR1;BIRC3
Negative Regulation of Protein Maturation (GO:1903318)	2/10	20	0.012184	0.175007	14.32	63.1172	PRNP;CHAC1
Pigment Catabolic Process (GO:0046149)	2/10	20	0.012184	0.175007	14.32	63.1172	ABCC2;HMOX1
Positive Regulation of Lipid Localization (GO:1905954)	2/10	20	0.012184	0.175007	14.32	63.1172	C3;ZC3H12A
Positive Regulation of Tumor Necrosis Factor-Mediated Signaling Pathway (GO:1903265)	2/10	20	0.012184	0.175007	14.32	63.1172	CASP1;HSPA1B
Regulation of T-helper 17 Cell Differentiation (GO:2000319)	2/10	20	0.012184	0.175007	14.32	63.1172	NFKBIZ;ZC3H12A
Positive Regulation of miRNA Metabolic Process (GO:2000630)	4/53	7.55	0.0131212	0.186923	4.6935	20.3395	EGR1;TGFB2;IL6;ZC3H12A
Regulation of Vascular Endothelial Growth Factor Production (GO:0010574)	3/29	10.34	0.0133411	0.188511	6.6225	28.5886	C3;IL6;IL1B
Regulation of Protein Ubiquitination (GO:0031396)	6/113	5.31	0.0136495	0.190157	3.2335	13.8847	BEX2;ANGPT1;TBC1D7;SQSTM1;HSPA1B;BIRC3
Positive Regulation of Chemokine Production (GO:0032722)	4/54	7.41	0.013983	0.190157	4.5994	19.6391	EGR1;IL6;IL1B;HMOX1
Regulation of Interleukin-8 Production (GO:0032677)	5/83	6.02	0.0144047	0.190157	3.691	15.6505	IL6;DDIT3;IL1B;SERPINE1;HSPA1B
Positive Regulation of Cell Differentiation (GO:0045597)	11/297	3.7	0.0145048	0.190157	2.2304	9.442	SLC6A6;CSF3;TGFB2;IL6;CSF2;BAMBI;IL1B;ZC3H12A;GCNT2;NRCAM;CD34
Cell Surface Toll-Like Receptor Signaling Pathway (GO:0140895)	3/30	10	0.0146375	0.190157	6.3769	26.9369	NFKBIA;IRAK2;TNIP3
Negative Regulation of Cytokine Production Involved in Inflammatory Response (GO:1900016)	3/30	10	0.0146375	0.190157	6.3769	26.9369	NFKBIA;ZC3H12A;HMOX1
Prostaglandin Metabolic Process (GO:0006693)	3/30	10	0.0146375	0.190157	6.3769	26.9369	AKR1C1;AKR1C3;PTGR1
Regulation of Programmed Necrotic Cell Death (GO:0062098)	2/11	18.18	0.0147232	0.190157	12.7282	53.6918	NUPR1;BIRC3
Skeletal Muscle Tissue Regeneration (GO:0043403)	2/11	18.18	0.0147232	0.190157	12.7282	53.6918	XIRP1;TMEM182
Negative Regulation of Fibrinolysis (GO:0051918)	2/11	18.18	0.0147232	0.190157	12.7282	53.6918	SLC48A1;SERPINE1
Regulation of Cell Activation (GO:0050865)	2/11	18.18	0.0147232	0.190157	12.7282	53.6918	SLC48A1;IL6
Negative Regulation of Growth (GO:0045926)	6/115	5.22	0.0147771	0.190157	3.1738	13.3766	TSPYL2;SLC48A1;TGFB2;SESN2;OSGIN1;HSPA1B
Regulation of Cytokine Production Involved in Inflammatory Response (GO:1900015)	4/55	7.27	0.01488	0.190157	4.509	18.9727	NFKBIA;IL6;ZC3H12A;HMOX1
Vascular Transport (GO:0010232)	5/84	5.95	0.0151065	0.191643	3.6441	15.2783	SLC6A6;SLC13A3;ABCC2;ABCB1;SLC1A5
Negative Regulation of Programmed Cell Death (GO:0043069)	13/382	3.4	0.0158368	0.198663	2.0465	8.4838	NQO1;ANGPT1;ASNS;HSPB1;SLC7A11;IL6;PPIF;HMOX1;ANGPTL4;NUPR1;SQSTM1;HSPA1B;BIRC3
Vacuolar Acidification (GO:0007035)	3/31	9.68	0.0160028	0.198663	6.1488	25.4253	ATP6V0B;ATP6V0A4;ATP6V0D2
Intracellular pH Reduction (GO:0051452)	3/31	9.68	0.0160028	0.198663	6.1488	25.4253	ATP6V0B;ATP6V0A4;ATP6V0D2
Transport Across Blood-Brain Barrier (GO:0150104)	5/86	5.81	0.0165778	0.204342	3.5537	14.5692	SLC6A6;SLC13A3;ABCC2;ABCB1;SLC1A5
Regulation of Extrinsic Apoptotic Signaling Pathway via Death Domain Receptors (GO:1902041)	3/32	9.38	0.0174372	0.205136	5.9365	24.0377	SERPINE1;HMOX1;ICAM1
Regulation of Macrophage Derived Foam Cell Differentiation (GO:0010743)	3/32	9.38	0.0174372	0.205136	5.9365	24.0377	NFKBIA;CSF2;IL1B
Fibrinolysis (GO:0042730)	2/12	16.67	0.0174685	0.205136	11.4548	46.3617	SERPINB2;SERPINE1
Intracellular Copper Ion Homeostasis (GO:0006878)	2/12	16.67	0.0174685	0.205136	11.4548	46.3617	COX19;PRNP
Negative Regulation of Cellular Response to Vascular Endothelial Growth Factor Stimulus (GO:1902548)	2/12	16.67	0.0174685	0.205136	11.4548	46.3617	SLC48A1;ANGPT1
Negative Regulation of Transmembrane Transport (GO:0034763)	2/12	16.67	0.0174685	0.205136	11.4548	46.3617	IL1B;OAZ3
Porphyrin-Containing Compound Catabolic Process (GO:0006787)	2/12	16.67	0.0174685	0.205136	11.4548	46.3617	ABCC2;HMOX1
Regulation of Autophagy (GO:0010506)	9/230	3.91	0.0187655	0.218889	2.3554	9.3646	UCHL1;ATP6V0B;DDIT3;ZC3H12A;HSPB1;TRIB3;NUPR1;ATP6V0D2;SQSTM1
Regulation of Cell Adhesion Mediated by Integrin (GO:0033628)	3/33	9.09	0.0189411	0.219464	5.7383	22.7605	SLC48A1;TGFB2;SERPINE1
Response to Cytokine (GO:0034097)	6/123	4.88	0.0199348	0.222775	2.9556	11.572	CSF3;IRAK2;KYNU;IL1B;TIMP1;RELB
ERBB2 Signaling Pathway (GO:0038128)	2/13	15.38	0.0204118	0.222775	10.4129	40.5234	PTPRR;EREG
Cellular Response to Arsenic-Containing Substance (GO:0071243)	2/13	15.38	0.0204118	0.222775	10.4129	40.5234	ZC3H12A;PPIF
Regulation of Vasculogenesis (GO:2001212)	2/13	15.38	0.0204118	0.222775	10.4129	40.5234	HEY1;CD34
Synaptic Vesicle Membrane Organization (GO:0048499)	2/13	15.38	0.0204118	0.222775	10.4129	40.5234	SYNGR2;SYP
Tertiary Alcohol Metabolic Process (GO:1902644)	2/13	15.38	0.0204118	0.222775	10.4129	40.5234	AKR1C1;AKR1C3
Hyaluronan Metabolic Process (GO:0030212)	2/13	15.38	0.0204118	0.222775	10.4129	40.5234	TNFAIP6;IL1B
Myeloid Dendritic Cell Activation (GO:0001773)	2/13	15.38	0.0204118	0.222775	10.4129	40.5234	BATF2;CSF2
Positive Regulation of Heterotypic Cell-Cell Adhesion (GO:0034116)	2/13	15.38	0.0204118	0.222775	10.4129	40.5234	IL1B;GCNT2
Tumor Necrosis Factor-Mediated Signaling Pathway (GO:0033209)	3/34	8.82	0.0205146	0.222775	5.5529	21.5821	NFKBIA;TRAF1;BIRC3
Regulation of Epithelial to Mesenchymal Transition (GO:0010717)	5/91	5.49	0.0206643	0.222775	3.3463	12.9814	TGFB2;IL6;BAMBI;IL1B;GCNT2
Response to Endoplasmic Reticulum Stress (GO:0034976)	8/196	4.08	0.0207705	0.222775	2.4581	9.5233	CXCL8;MMP1;DDIT3;FBXO6;TRIB3;CHAC1;ATF3;ATF4
Regulation of Reactive Oxygen Species Metabolic Process (GO:2000377)	4/61	6.56	0.0210213	0.222775	4.0331	15.5768	AKR1C1;ZC3H12A;MMP3;AKR1C3
Negative Regulation of Canonical NF-kappaB Signal Transduction (GO:0043124)	4/61	6.56	0.0210213	0.222775	4.0331	15.5768	NFKBIA;IRAK2;TNIP3;ZC3H12A
Regulation of Interleukin-17 Production (GO:0032660)	3/35	8.57	0.0221577	0.2306	5.3791	20.4921	PRNP;IL6;DDIT3
Regulation of p38MAPK Cascade (GO:1900744)	3/35	8.57	0.0221577	0.2306	5.3791	20.4921	GADD45B;IL1B;ZC3H12A
Toll-Like Receptor Signaling Pathway (GO:0002224)	3/35	8.57	0.0221577	0.2306	5.3791	20.4921	IRAK2;TNIP3;CTSS
+ Reg of Phosphatidylinositol 3-Kinase/Prot Kinase B Signal Transduction (GO:0051897)	7/162	4.32	0.0225582	0.23337	2.6055	9.879	CSF3;TGFB2;ANGPT1;IL1B;GCNT2;AKR1C3;HBEGF
Negative Regulation of Metabolic Process (GO:0009892)	4/63	6.35	0.0233661	0.239314	3.896	14.6353	DDIT3;IL1B;MMP3;ATF4
Regulation of Coagulation (GO:0050818)	2/14	14.29	0.0235458	0.239314	9.5447	35.7813	SLC48A1;SERPINE1
Positive Regulation of Acute Inflammatory Response (GO:0002675)	2/14	14.29	0.0235458	0.239314	9.5447	35.7813	IL6;IL1B
'De Novo' Post-Translational Protein Folding (GO:0051084)	3/36	8.33	0.0238706	0.23981	5.2158	19.4817	DNAJB4;HSPA6;HSPA1B
Cellular Response to Heat (GO:0034605)	3/36	8.33	0.0238706	0.23981	5.2158	19.4817	HSPA6;HMOX1;HSPA1B
Positive Regulation of Defense Response (GO:0031349)	6/130	4.62	0.0253522	0.25323	2.7878	10.2447	NFKBIA;IL1B;SERPINE1;NFKBIZ;CASP1;EREG
Regulation of Release of Cytochrome C From Mitochondria (GO:0090199)	3/37	8.11	0.0256532	0.254773	5.0622	18.5432	MLLT11;PPIF;BID
Regulation of Oxidative Phosphorylation (GO:0002082)	2/15	13.33	0.0268629	0.259376	8.81	31.866	PPIF;NUPR1
Retinal Metabolic Process (GO:0042574)	2/15	13.33	0.0268629	0.259376	8.81	31.866	AKR1C1;AKR1C3
Copper Ion Homeostasis (GO:0055070)	2/15	13.33	0.0268629	0.259376	8.81	31.866	COX19;PRNP
Glycoside Metabolic Process (GO:0016137)	2/15	13.33	0.0268629	0.259376	8.81	31.866	AKR1C1;AKR1C3
Positive Regulation of Transmembrane Transport (GO:0034764)	2/15	13.33	0.0268629	0.259376	8.81	31.866	C3;ACSL5
Glutathione Metabolic Process (GO:0006749)	3/38	7.89	0.0275054	0.264113	4.9173	17.6697	GSTM3;GSR;GCLM
Response to Molecule of Bacterial Origin (GO:0002237)	4/67	5.97	0.0285156	0.27082	3.6479	12.9767	IL6;CXCL8;IL1B;CXCL2
Negative Regulation of Cell Adhesion (GO:0007162)	4/67	5.97	0.0285156	0.27082	3.6479	12.9767	SLC48A1;ANGPT1;SERPINE1;GCNT2
Positive Regulation of Programmed Cell Death (GO:0043068)	9/248	3.63	0.028729	0.271365	2.176	7.7246	MLLT11;SLC48A1;IL6;GADD45B;ANKRD1;MAP3K10;BID;SQSTM1;ATF4
Regulation of Inflammatory Response (GO:0050727)	9/249	3.61	0.0293736	0.274785	2.1669	7.6439	NFKBIA;IL6;TNFAIP6;IL1B;SERPINE1;NFKBIZ;MMP3;CASP1;BIRC3
Regulation of Axon Extension (GO:0030516)	3/39	7.69	0.029427	0.274785	4.7805	16.8551	CDKL3;ZFYVE27;NRCAM
C21-steroid Hormone Metabolic Process (GO:0008207)	2/16	12.5	0.030356	0.274785	8.1803	28.5883	AKR1C1;AKR1C3
Regulation of Fibrinolysis (GO:0051917)	2/16	12.5	0.030356	0.274785	8.1803	28.5883	SLC48A1;SERPINE1
Mesenchyme Morphogenesis (GO:0072132)	2/16	12.5	0.030356	0.274785	8.1803	28.5883	TGFB2;HEY1
Neurotrophin Signaling Pathway (GO:0038179)	2/16	12.5	0.030356	0.274785	8.1803	28.5883	ZFYVE27;DDIT4
Positive Regulation of Lipid Storage (GO:0010884)	2/16	12.5	0.030356	0.274785	8.1803	28.5883	C3;ZC3H12A
Positive Regulation of Positive Chemotaxis (GO:0050927)	2/16	12.5	0.030356	0.274785	8.1803	28.5883	CXCL8;PGF
Hemopoiesis (GO:0030097)	5/101	4.95	0.0306861	0.276334	2.9962	10.4385	TGFB2;CSF2;IL7R;CD34;ATF4
Negative Regulation of Proteolysis (GO:0045861)	3/40	7.5	0.0314177	0.281464	4.651	16.0943	PRNP;CHAC1;TIMP1
Regulation of Endothelial Cell Chemotaxis (GO:2001026)	2/17	11.76	0.0340179	0.298916	7.6346	25.8116	SLC48A1;HSPB1
Release of Cytochrome C From Mitochondria (GO:0001836)	2/17	11.76	0.0340179	0.298916	7.6346	25.8116	SOD2;BID
Organophosphate Catabolic Process (GO:0046434)	2/17	11.76	0.0340179	0.298916	7.6346	25.8116	ENPP2;GALM
Negative Regulation of Intracellular Signal Transduction (GO:1902532)	10/297	3.37	0.0340538	0.298916	2.0145	6.8085	DGKG;NFKBIA;IRAK2;DDIT3;TNIP3;ZC3H12A;DDIT4;TBC1D7;PPIF;ARHGAP25
Positive Regulation of Intracellular Signal Transduction (GO:1902533)	18/652	2.76	0.0346179	0.302341	1.6515	5.5545	PRNP;CSF3;TGFB2;ANGPT1;AKR1C3;OASL;IL6;IRAK2;DDIT3;IL1B;GCNT2;CASP1;HMOX1;TRIM16;NUPR1;BID;HBEGF;BIRC3
Response to Hydrogen Peroxide (GO:0042542)	3/42	7.14	0.0356055	0.309411	4.4121	14.7153	IL6;PPIF;HMOX1
Regulation of Phosphatidylinositol 3-Kinase/Protein Kinase B Signal Transduction (GO:0051896)	8/219	3.65	0.0367316	0.309615	2.1876	7.228	CSF3;TGFB2;ANGPT1;DDIT3;IL1B;GCNT2;AKR1C3;HBEGF
Regulation of Apoptotic Process (GO:0042981)	19/704	2.7	0.0370545	0.309615	1.614	5.3188	SLC48A1;EGR1;BEX2;GADD45B;ANGPT1;ASNS;HSPB1;MLLT11;IL6;ANKRD1;PPIF;MAP3K10;ANGPTL4;NUPR1;BID;SQSTM1;HSPA1B;ATF4;BIRC3
Embryonic Organ Development (GO:0048568)	4/73	5.48	0.0374105	0.309615	3.3297	10.9407	TGFB2;CXCL8;HEY1;ATF4
Regulation of Epithelial Cell Migration (GO:0010632)	3/43	6.98	0.0378017	0.309615	4.3015	14.0893	PTPRR;TGFB2;ENPP2
Cellular Response to Glucose Starvation (GO:0042149)	3/43	6.98	0.0378017	0.309615	4.3015	14.0893	SESN2;ZC3H12A;ATF4
Positive Regulation of Receptor-Mediated Endocytosis (GO:0048260)	3/43	6.98	0.0378017	0.309615	4.3015	14.0893	C3;ANGPT1;SERPINE1
Regulation of Chemokine Production (GO:0032642)	3/43	6.98	0.0378017	0.309615	4.3015	14.0893	EGR1;IL6;HMOX1
NAD Metabolic Process (GO:0019674)	2/18	11.11	0.037842	0.309615	7.1571	23.4346	NMNAT1;KYNU
Regulation of Oxidoreductase Activity (GO:0051341)	2/18	11.11	0.037842	0.309615	7.1571	23.4346	IL1B;SIRT4
Synaptic Transmission, Cholinergic (GO:0007271)	2/18	11.11	0.037842	0.309615	7.1571	23.4346	NQO1;CHRNE
Glycerolipid Catabolic Process (GO:0046503)	2/18	11.11	0.037842	0.309615	7.1571	23.4346	PLA2G4C;GDPD1
Negative Regulation of Nervous System Development (GO:0051961)	2/18	11.11	0.037842	0.309615	7.1571	23.4346	IL6;IL1B
Protein Catabolic Process (GO:0030163)	5/107	4.67	0.0379447	0.309615	2.8191	9.2229	UCHL1;FBXO6;CTSW;SQSTM1;CTSS
Myeloid Leukocyte Differentiation (GO:0002573)	4/74	5.41	0.039031	0.31699	3.2819	10.6447	BATF2;CSF3;CSF2;PIR
Amino Acid Transport (GO:0006865)	3/44	6.82	0.0400656	0.322109	4.1964	13.5008	SLC6A6;SLC3A2;SLC1A5
Positive Regulation of Wound Healing (GO:0090303)	3/44	6.82	0.0400656	0.322109	4.1964	13.5008	SERPINE1;CLDN1;HBEGF
Positive Regulation of Gene Expression (GO:0010628)	13/436	2.98	0.0402174	0.322109	1.7803	5.7209	IL32;EGR1;CSF2;CXCL8;ANGPT1;EREG;IL6;DNAJA4;IL1B;ZC3H12A;CD34;HSPA1B;ATF4
Regulation of Receptor Signaling Pathway via STAT (GO:1904892)	2/19	10.53	0.0418215	0.323048	6.7357	21.3815	IL6;IL7R
Cardiac Epithelial to Mesenchymal Transition (GO:0060317)	2/19	10.53	0.0418215	0.323048	6.7357	21.3815	TGFB2;HEY1
Female Meiotic Nuclear Division (GO:0007143)	2/19	10.53	0.0418215	0.323048	6.7357	21.3815	MEIOC;EREG
Negative Regulation of Endopeptidase Activity (GO:0010951)	2/19	10.53	0.0418215	0.323048	6.7357	21.3815	SERPINE1;TIMP1
Negative Regulation of Lipid Storage (GO:0010888)	2/19	10.53	0.0418215	0.323048	6.7357	21.3815	NFKBIA;IL6
Positive Regulation of Macrophage Derived Foam Cell Differentiation (GO:0010744)	2/19	10.53	0.0418215	0.323048	6.7357	21.3815	CSF2;IL1B
Pulmonary Valve Morphogenesis (GO:0003184)	2/19	10.53	0.0418215	0.323048	6.7357	21.3815	TGFB2;HEY1
Regulation of RIG-I Signaling Pathway (GO:0039535)	2/19	10.53	0.0418215	0.323048	6.7357	21.3815	OASL;BIRC3
Positive Regulation of Protein Ubiquitination (GO:0031398)	4/76	5.26	0.0423907	0.324605	3.1905	10.0845	ANGPT1;TBC1D7;TRIB3;BIRC3
Response to Amyloid-Beta (GO:1904645)	3/45	6.67	0.0423967	0.324605	4.0963	12.9471	PRNP;MMP3;ICAM1
Negative Regulation of Cellular Process (GO:0048523)	15/531	2.82	0.0431462	0.328781	1.686	5.2992	TSPYL2;SLC48A1;TGFB2;CXCL8;ANGPT1;OSGIN1;CXCL1;SOD2;EREG;NFKBIA;IL6;IL1B;SESN2;NUPR1;HSPA1B
Positive Regulation of Cellular Component Organization (GO:0051130)	5/111	4.5	0.0433204	0.328781	2.7121	8.5137	TGFB2;MMP1;IL1B;MMP3;BID
Cellular Response to UV (GO:0034644)	4/77	5.19	0.0441299	0.331374	3.1466	9.8193	MMP1;MMP3;TIMP1;ATF4
Mononuclear Cell Differentiation (GO:1903131)	3/46	6.52	0.0447944	0.331374	4.0008	12.4252	CSF2;PIR;RELB
Positive Regulation of Chemotaxis (GO:0050921)	3/46	6.52	0.0447944	0.331374	4.0008	12.4252	IL6;HSPB1;CCL26
Regulation of Endopeptidase Activity (GO:0052548)	2/20	10	0.04595	0.331374	6.3612	19.5938	SERPINE1;TIMP1
Atrioventricular Valve Morphogenesis (GO:0003181)	2/20	10	0.04595	0.331374	6.3612	19.5938	TGFB2;HEY1
Cellular Response to Fatty Acid (GO:0071398)	2/20	10	0.04595	0.331374	6.3612	19.5938	ZC3H12A;AKR1C3
Endocardial Cushion Morphogenesis (GO:0003203)	2/20	10	0.04595	0.331374	6.3612	19.5938	TGFB2;HEY1
Xenobiotic Transport (GO:0042908)	2/20	10	0.04595	0.331374	6.3612	19.5938	ABCB1;ABCC2
Heart Trabecula Morphogenesis (GO:0061384)	2/20	10	0.04595	0.331374	6.3612	19.5938	TGFB2;HEY1
Positive Regulation of Blood Coagulation (GO:0030194)	2/20	10	0.04595	0.331374	6.3612	19.5938	SLC48A1;SERPINE1
Positive Regulation of Release of Cytochrome C From Mitochondria (GO:0090200)	2/20	10	0.04595	0.331374	6.3612	19.5938	MLLT11;BID
Purine Nucleotide Biosynthetic Process (GO:0006164)	2/20	10	0.04595	0.331374	6.3612	19.5938	NMNAT1;KYNU
Regulation of Endothelial Cell Apoptotic Process (GO:2000351)	3/47	6.38	0.0472581	0.338002	3.9097	11.9329	ANGPT1;SERPINE1;ICAM1
Positive Regulation of miRNA Transcription (GO:1902895)	3/47	6.38	0.0472581	0.338002	3.9097	11.9329	EGR1;TGFB2;IL6
Positive Regulation of Protein Modification by Small Protein Conjugation or Removal (GO:1903322)	4/79	5.06	0.0477269	0.339956	3.0624	9.3165	ANGPT1;ZC3H12A;TBC1D7;BIRC3
Negative Regulation of Cytokine Production (GO:0001818)	7/191	3.66	0.048228	0.342123	2.1916	6.6444	NFKBIA;PRNP;IL6;DDIT3;ZC3H12A;HMOX1;CD34
Intrinsic Apoptotic Signaling Pathway (GO:0097193)	5/115	4.35	0.0491311	0.346367	2.613	7.8736	MLLT11;DDIT3;TRIB3;CHAC1;ATF4
Signal Transduction in Response to DNA Damage (GO:0042770)	4/80	5	0.0495846	0.346367	3.0219	9.0781	RRAD;SESN2;FBXO6;BID
Mitophagy (GO:0000423)	3/48	6.25	0.0497872	0.346367	3.8226	11.4678	GABARAPL1;MAP1LC3B2;SQSTM1
Primary Alcohol Metabolic Process (GO:0034308)	3/48	6.25	0.0497872	0.346367	3.8226	11.4678	AKR1C1;GDPD1;AKR1C3
Endothelial Cell Proliferation (GO:0001935)	2/21	9.52	0.0502212	0.346367	6.0261	18.0259	HMOX1;CD34
Establishment of Skin Barrier (GO:0061436)	2/21	9.52	0.0502212	0.346367	6.0261	18.0259	TMEM79;CLDN1
Pulmonary Valve Development (GO:0003177)	2/21	9.52	0.0502212	0.346367	6.0261	18.0259	TGFB2;HEY1
Wound Healing (GO:0042060)	4/81	4.94	0.0514816	0.352264	2.9825	8.8477	TGFB2;HMOX1;CLDN1;EREG
Regulation of Catabolic Process (GO:0009894)	4/81	4.94	0.0514816	0.352264	2.9825	8.8477	DDIT3;HSPB1;TRIB3;NUPR1
Positive Regulation of Smooth Muscle Cell Proliferation (GO:0048661)	3/49	6.12	0.052381	0.357012	3.7393	11.028	IL6;HMOX1;EREG
Endocardial Cushion Development (GO:0003197)	2/22	9.09	0.0546289	0.369334	5.7245	16.6422	TGFB2;HEY1
Negative Regulation of Cell Development (GO:0010721)	2/22	9.09	0.0546289	0.369334	5.7245	16.6422	IL6;IL1B
Regulation of Interleukin-2 Production (GO:0032663)	3/50	6	0.0550388	0.369334	3.6596	10.6117	PRNP;IL1B;CD34
Positive Regulation of Blood Vessel Endothelial Cell Migration (GO:0043536)	3/50	6	0.0550388	0.369334	3.6596	10.6117	ANGPT1;HSPB1;HMOX1
Regulation of Protein Kinase Activity (GO:0045859)	4/83	4.82	0.0553931	0.370282	2.9067	8.41	TSPYL2;HSPB1;TRIB3;EREG
Regulation of Heterotypic Cell-Cell Adhesion (GO:0034114)	2/23	8.7	0.0591672	0.385141	5.4516	15.4138	IL1B;GCNT2
Carbohydrate Derivative Catabolic Process (GO:1901136)	2/23	8.7	0.0591672	0.385141	5.4516	15.4138	FBXO6;GALM
Dendritic Cell Differentiation (GO:0097028)	2/23	8.7	0.0591672	0.385141	5.4516	15.4138	BATF2;CSF2
Skin Epidermis Development (GO:0098773)	2/23	8.7	0.0591672	0.385141	5.4516	15.4138	TMEM79;CLDN1
Monocyte Chemotaxis (GO:0002548)	2/23	8.7	0.0591672	0.385141	5.4516	15.4138	IL6;CCL26
Negative Regulation of Peptidase Activity (GO:0010466)	2/23	8.7	0.0591672	0.385141	5.4516	15.4138	SERPINE1;TIMP1
Positive Regulation of T Cell Cytokine Production (GO:0002726)	2/23	8.7	0.0591672	0.385141	5.4516	15.4138	IL6;IL1B
Carbohydrate Metabolic Process (GO:0005975)	4/85	4.71	0.0594606	0.385607	2.8347	8.0006	B3GAT3;GCNT3;GALM;ST6GALNAC4
Negative Regulation of DNA-binding Transcription Factor Activity (GO:0043433)	5/122	4.1	0.0603534	0.388283	2.4558	6.8946	NFKBIA;ZC3H12A;ID3;MAP3K10;NUPR1
Negative Regulation of Protein Ubiquitination (GO:0031397)	3/52	5.77	0.0605436	0.388283	3.5098	9.843	BEX2;SQSTM1;HSPA1B
Positive Regulation of Reactive Oxygen Species Metabolic Process (GO:2000379)	3/52	5.77	0.0605436	0.388283	3.5098	9.843	AKR1C1;ZC3H12A;AKR1C3
Cellular Response to Mechanical Stimulus (GO:0071260)	3/53	5.66	0.0633889	0.392793	3.4395	9.4877	IL1B;CASP1;MAP3K14
Acute Inflammatory Response (GO:0002526)	2/24	8.33	0.0638304	0.392793	5.2036	14.3177	IL6;VNN1
Aminoglycan Biosynthetic Process (GO:0006023)	2/24	8.33	0.0638304	0.392793	5.2036	14.3177	B3GAT3;GCNT2
Cellular Response to Steroid Hormone Stimulus (GO:0071383)	2/24	8.33	0.0638304	0.392793	5.2036	14.3177	AKR1C3;HSPA1B
Endothelial Cell Development (GO:0001885)	2/24	8.33	0.0638304	0.392793	5.2036	14.3177	GSTM3;ICAM1
Negative Regulation of Cell Population Proliferation (GO:0008285)	11/379	2.9	0.0653862	0.392793	1.7261	4.7078	SLC48A1;TGFB2;IL6;CXCL8;IL1B;HMOX1;CXCL1;NUPR1;SOD2;HSPA1B;EREG
Regulation of Type II Interferon Production (GO:0032649)	4/88	4.55	0.0658515	0.392793	2.733	7.4347	PRNP;DDIT3;IL1B;ZC3H12A
Regulation of Smooth Muscle Cell Proliferation (GO:0048660)	3/54	5.56	0.0662952	0.392793	3.3719	9.15	IL6;HMOX1;EREG
Cellular Response to Hormone Stimulus (GO:0032870)	4/89	4.49	0.0680582	0.392793	2.7007	7.2579	AKR1C1;AKR1C3;CTSS;HSPA1B
Regulation of Membrane Protein Ectodomain Proteolysis (GO:0051043)	2/25	8	0.0686128	0.392793	4.9771	13.3349	IL1B;TIMP1
Bile Acid and Bile Salt Transport (GO:0015721)	2/25	8	0.0686128	0.392793	4.9771	13.3349	ABCC2;AKR1C1
Regulation of Protein Processing (GO:0070613)	2/25	8	0.0686128	0.392793	4.9771	13.3349	PRNP;CHAC1
Regulation of Vascular Endothelial Growth Factor Signaling Pathway (GO:1900746)	2/25	8	0.0686128	0.392793	4.9771	13.3349	SLC48A1;ANGPT1
Icosanoid Biosynthetic Process (GO:0046456)	2/25	8	0.0686128	0.392793	4.9771	13.3349	CASP1;AKR1C3
Icosanoid Metabolic Process (GO:0006690)	3/55	5.45	0.0692614	0.392793	3.3068	8.8288	PLA2G4C;CASP1;PTGR1
Negative Regulation of Apoptotic Process (GO:0043066)	13/475	2.74	0.0694339	0.392793	1.6267	4.339	ANGPT1;SERPINE1;ASNS;HSPB1;SOD2;ICAM1;IL6;ZC3H12A;PPIF;ANGPTL4;NUPR1;HSPA1B;BIRC3
Sulfur Compound Biosynthetic Process (GO:0044272)	3/56	5.36	0.0722868	0.392793	3.2443	8.5231	B3GAT3;CHAC1;GCLM
Positive Regulation of Leukocyte Chemotaxis (GO:0002690)	3/56	5.36	0.0722868	0.392793	3.2443	8.5231	IL6;SERPINE1;PGF
Regulation of Neutrophil Chemotaxis (GO:0090022)	2/26	7.69	0.0735088	0.392793	4.7694	12.4499	CXCL8;TNFAIP6
Diterpenoid Metabolic Process (GO:0016101)	2/26	7.69	0.0735088	0.392793	4.7694	12.4499	AKR1C1;AKR1C3
Glutamine Family Amino Acid Metabolic Process (GO:0009064)	2/26	7.69	0.0735088	0.392793	4.7694	12.4499	SIRT4;GCLM
Negative Regulation of Endothelial Cell Apoptotic Process (GO:2000352)	2/26	7.69	0.0735088	0.392793	4.7694	12.4499	SERPINE1;ICAM1
Negative Regulation of Fatty Acid Metabolic Process (GO:0045922)	2/26	7.69	0.0735088	0.392793	4.7694	12.4499	SIRT4;TRIB3
Negative Regulation of Lipid Biosynthetic Process (GO:0051055)	2/26	7.69	0.0735088	0.392793	4.7694	12.4499	AKR1C3;TRIB3
Positive Regulation of Nuclear Division (GO:0051785)	2/26	7.69	0.0735088	0.392793	4.7694	12.4499	IL1B;EREG
Regulation of Osteoblast Differentiation (GO:0045667)	4/92	4.35	0.0749047	0.392793	2.6082	6.7594	IL6;TNFAIP6;BAMBI;ATF4
Heart Morphogenesis (GO:0003007)	3/57	5.26	0.0753705	0.392793	3.184	8.2318	TGFB2;HEY1;ANKRD1
Regulation of Blood Vessel Endothelial Cell Migration (GO:0043535)	3/57	5.26	0.0753705	0.392793	3.184	8.2318	SLC48A1;ANGPT1;HSPB1
Positive Regulation of Cell Migration (GO:0030335)	10/344	2.91	0.0759183	0.392793	1.7268	4.4518	TGFB2;ANGPT1;IL1B;ZC3H12A;GCNT2;ENPP2;SOD2;CLDN1;HBEGF;CCL26
Positive Regulation of Protein Phosphorylation (GO:0001934)	6/171	3.51	0.0763392	0.392793	2.0906	5.3783	C3;IL6;ANGPT1;LIMCH1;ENPP2;EREG
Regulation of Epithelial Cell Proliferation (GO:0050678)	4/93	4.3	0.0772614	0.392793	2.5788	6.6032	TGFB2;ANGPT1;NUPR1;EREG
Nitrogen Compound Transport (GO:0071705)	6/172	3.49	0.0780151	0.392793	2.0779	5.3005	SLC48A1;SLC6A6;ABCC2;TOM1;SLC3A2;SLC1A5
ERBB Signaling Pathway (GO:0038127)	3/58	5.17	0.0785115	0.392793	3.126	7.9541	PTPRR;EREG;HBEGF
Cellular Response to Unfolded Protein (GO:0034620)	3/58	5.17	0.0785115	0.392793	3.126	7.9541	HSPB8;DDIT3;ATF4
Negative Regulation of Protein Modification by Small Protein Conjugation or Removal (GO:1903321)	3/58	5.17	0.0785115	0.392793	3.126	7.9541	BEX2;SQSTM1;HSPA1B
ER-nucleus Signaling Pathway (GO:0006984)	2/27	7.41	0.0785133	0.392793	4.5784	11.6497	DDIT3;ATF4
Negative Regulation of Neurogenesis (GO:0050768)	2/27	7.41	0.0785133	0.392793	4.5784	11.6497	IL6;IL1B
Positive Regulation of Lipid Metabolic Process (GO:0045834)	2/27	7.41	0.0785133	0.392793	4.5784	11.6497	IL1B;SIRT4
Positive Regulation of DNA-binding Transcription Factor Activity (GO:0051091)	6/174	3.45	0.0814291	0.392793	2.053	5.149	BEX2;IL6;DDIT3;IL1B;TRAF1;HSPA1B
Positive Regulation of Immune Response (GO:0050778)	4/95	4.21	0.0820851	0.392793	2.5219	6.3047	SLC48A1;TGFB2;AKR1C1;EREG
Reg of Epithelial to Mesenchymal Transition Inv in Endocardial Cushion Formation (GO:1905005)	1/5	20	0.083333	0.392793	14.2812	35.4876	TGFB2
ERBB2-EGFR Signaling Pathway (GO:0038134)	1/5	20	0.083333	0.392793	14.2812	35.4876	EREG
ERBB4 Signaling Pathway (GO:0038130)	1/5	20	0.083333	0.392793	14.2812	35.4876	EREG
Regulation of Glucagon Secretion (GO:0070092)	1/5	20	0.083333	0.392793	14.2812	35.4876	IL6
L-aspartate Import Across Plasma Membrane (GO:0140009)	1/5	20	0.083333	0.392793	14.2812	35.4876	SLC1A5
L-aspartate Transmembrane Transport (GO:0070778)	1/5	20	0.083333	0.392793	14.2812	35.4876	SLC1A5
Regulation of Hormone Biosynthetic Process (GO:0046885)	1/5	20	0.083333	0.392793	14.2812	35.4876	EGR1
Regulation of Long-Chain Fatty Acid Import Across Plasma Membrane (GO:0010746)	1/5	20	0.083333	0.392793	14.2812	35.4876	ACSL5
Toll Signaling Pathway (GO:0008063)	1/5	20	0.083333	0.392793	14.2812	35.4876	IRAK2
Activation of Transmembrane Receptor Protein Tyrosine Kinase Activity (GO:0007171)	1/5	20	0.083333	0.392793	14.2812	35.4876	ANGPT1
Regulation of miRNA Catabolic Process (GO:2000625)	1/5	20	0.083333	0.392793	14.2812	35.4876	ZC3H12A
Alpha-Beta T Cell Differentiation (GO:0046632)	1/5	20	0.083333	0.392793	14.2812	35.4876	TNFSF8
Aromatic Amino Acid Metabolic Process (GO:0009072)	1/5	20	0.083333	0.392793	14.2812	35.4876	KYNU
Regulation of Prostaglandin Biosynthetic Process (GO:0031392)	1/5	20	0.083333	0.392793	14.2812	35.4876	IL1B
Regulation of Transforming Growth Factor Beta2 Production (GO:0032909)	1/5	20	0.083333	0.392793	14.2812	35.4876	TGFB2
Cellular Response to Cold (GO:0070417)	1/5	20	0.083333	0.392793	14.2812	35.4876	NFKBIA
Chronic Inflammatory Response (GO:0002544)	1/5	20	0.083333	0.392793	14.2812	35.4876	VNN1
Response to Peptidoglycan (GO:0032494)	1/5	20	0.083333	0.392793	14.2812	35.4876	IL6
Dendrite Extension (GO:0097484)	1/5	20	0.083333	0.392793	14.2812	35.4876	CDKL3
Dermatan Sulfate Proteoglycan Metabolic Process (GO:0050655)	1/5	20	0.083333	0.392793	14.2812	35.4876	B3GAT3
Dopamine Biosynthetic Process (GO:0042416)	1/5	20	0.083333	0.392793	14.2812	35.4876	TGFB2
Endoplasmic Reticulum Tubular Network Formation (GO:0071787)	1/5	20	0.083333	0.392793	14.2812	35.4876	ZFYVE27
Extracellular Exosome Biogenesis (GO:0097734)	1/5	20	0.083333	0.392793	14.2812	35.4876	CD34
Uridine Transmembrane Transport (GO:0015862)	1/5	20	0.083333	0.392793	14.2812	35.4876	SLC28A3
Gamma-Aminobutyric Acid Import (GO:0051939)	1/5	20	0.083333	0.392793	14.2812	35.4876	SLC6A6
Glial Cell Migration (GO:0008347)	1/5	20	0.083333	0.392793	14.2812	35.4876	TGFB2
Glomerulus Vasculature Development (GO:0072012)	1/5	20	0.083333	0.392793	14.2812	35.4876	CD34
Xenobiotic Transport Across Blood-Brain Barrier (GO:1990962)	1/5	20	0.083333	0.392793	14.2812	35.4876	ABCC2
Hyaluronan Biosynthetic Process (GO:0030213)	1/5	20	0.083333	0.392793	14.2812	35.4876	IL1B
Intracellular Oxygen Homeostasis (GO:0032364)	1/5	20	0.083333	0.392793	14.2812	35.4876	SOD2
Leukocyte Apoptotic Process (GO:0071887)	1/5	20	0.083333	0.392793	14.2812	35.4876	IL6
Negative Regulation of T-helper 17 Type Immune Response (GO:2000317)	1/5	20	0.083333	0.392793	14.2812	35.4876	ZC3H12A
Negative Regulation of Lamellipodium Organization (GO:1902744)	1/5	20	0.083333	0.392793	14.2812	35.4876	SLC48A1
Negative Regulation of miRNA Processing (GO:1903799)	1/5	20	0.083333	0.392793	14.2812	35.4876	IL6
Negative Regulation of Trophoblast Cell Migration (GO:1901164)	1/5	20	0.083333	0.392793	14.2812	35.4876	TIMP1
Negative Regulation of Viral Life Cycle (GO:1903901)	1/5	20	0.083333	0.392793	14.2812	35.4876	IL32
Nucleoside Transport (GO:0015858)	1/5	20	0.083333	0.392793	14.2812	35.4876	SLC28A3
Pentose-Phosphate Shunt, Non-Oxidative Branch (GO:0009052)	1/5	20	0.083333	0.392793	14.2812	35.4876	TALDO1
Positive Regulation of T Cell Differentiation in Thymus (GO:0033089)	1/5	20	0.083333	0.392793	14.2812	35.4876	VNN1
Positive Regulation of T-helper 1 Cell Cytokine Production (GO:2000556)	1/5	20	0.083333	0.392793	14.2812	35.4876	IL1B
Positive Regulation of Aggrephagy (GO:1905337)	1/5	20	0.083333	0.392793	14.2812	35.4876	HSPB8
Positive Regulation of Neuroepithelial Cell Differentiation (GO:1902913)	1/5	20	0.083333	0.392793	14.2812	35.4876	SERPINE1
+ Reg of Nucleotide-Binding Domain, Leucine Rich Repeat Containing Receptor Sgnlng Pway (GO:0070426)	1/5	20	0.083333	0.392793	14.2812	35.4876	HSPA1B
Positive Regulation of Odontoblast Differentiation (GO:1901331)	1/5	20	0.083333	0.392793	14.2812	35.4876	SERPINE1
Positive Regulation of Platelet-Derived Growth Factor Receptor Signaling Pathway (GO:0010641)	1/5	20	0.083333	0.392793	14.2812	35.4876	IL1B
Positive Regulation of Unsaturated Fatty Acid Biosynthetic Process (GO:2001280)	1/5	20	0.083333	0.392793	14.2812	35.4876	IL1B
Positive Regulation of Vascular Associated Smooth Muscle Cell Differentiation (GO:1905065)	1/5	20	0.083333	0.392793	14.2812	35.4876	SOD2
Protein Targeting to Vacuole Involved in Autophagy (GO:0071211)	1/5	20	0.083333	0.392793	14.2812	35.4876	SQSTM1
Purine Nucleobase Transmembrane Transport (GO:1904823)	1/5	20	0.083333	0.392793	14.2812	35.4876	SLC28A3
Pyrimidine Nucleoside Transport (GO:0015864)	1/5	20	0.083333	0.392793	14.2812	35.4876	SLC28A3
Receptor-Mediated Virion Attachment to Host Cell (GO:0046813)	1/5	20	0.083333	0.392793	14.2812	35.4876	ICAM1
Regulation of RNA Polymerase II Regulatory Region Sequence-Specific DNA Binding (GO:1903025)	1/5	20	0.083333	0.392793	14.2812	35.4876	IL32
Regulation of T-helper 1 Cell Cytokine Production (GO:2000554)	1/5	20	0.083333	0.392793	14.2812	35.4876	IL1B
Regulation of Antigen Processing and Presentation (GO:0002577)	1/5	20	0.083333	0.392793	14.2812	35.4876	CTSS
Regulation of Blood Vessel Remodeling (GO:0060312)	1/5	20	0.083333	0.392793	14.2812	35.4876	SLC48A1
Regulation of Lipid Biosynthetic Process (GO:0046890)	2/28	7.14	0.0836211	0.392793	4.4021	10.9237	C3;SIRT4
Regulation of Protein Modification by Small Protein Conjugation or Removal (GO:1903320)	2/28	7.14	0.0836211	0.392793	4.4021	10.9237	EGR1;HSPA1B
Ventricular Septum Morphogenesis (GO:0060412)	2/28	7.14	0.0836211	0.392793	4.4021	10.9237	TGFB2;HEY1
Positive Regulation of Leukocyte Migration (GO:0002687)	2/28	7.14	0.0836211	0.392793	4.4021	10.9237	IL6;ICAM1
Negative Regulation of Intrinsic Apoptotic Signaling Pathway (GO:2001243)	3/60	5	0.0849617	0.39588	3.016	7.4361	PPIF;HSPB1;SOD2
Phosphatidylcholine Metabolic Process (GO:0046470)	3/60	5	0.0849617	0.39588	3.016	7.4361	ABHD4;PLA2G4C;ENPP2
Positive Regulation of Cell Cycle (GO:0045787)	3/60	5	0.0849617	0.39588	3.016	7.4361	TGFB2;ASNS;NUPR1
Negative Regulation of Cell Differentiation (GO:0045596)	7/220	3.18	0.0874937	0.400276	1.8904	4.6053	NFKBIA;IL6;HEY1;TNFAIP6;BAMBI;TRIB3;TMEM182
Autophagy of Mitochondrion (GO:0000422)	3/61	4.92	0.088269	0.400276	2.9639	7.1944	GABARAPL1;MAP1LC3B2;SQSTM1
Vascular Endothelial Growth Factor Receptor Signaling Pathway (GO:0048010)	2/29	6.9	0.088827	0.400276	4.2389	10.2625	HSPB1;PGF
Maintenance of Blood-Brain Barrier (GO:0035633)	2/29	6.9	0.088827	0.400276	4.2389	10.2625	IL6;CLDN1
Regulation of Blood Coagulation (GO:0030193)	2/29	6.9	0.088827	0.400276	4.2389	10.2625	SLC48A1;SERPINE1
Cellular Response to Transforming Growth Factor Beta Stimulus (GO:0071560)	4/98	4.08	0.0895917	0.400276	2.441	5.8889	TGFB2;BAMBI;ANKRD1;GCNT2
Regulation of Protein Secretion (GO:0050708)	4/99	4.04	0.092165	0.400276	2.4152	5.7582	TGFB2;IL6;IL1B;ANKRD1
L-amino Acid Transport (GO:0015807)	2/30	6.67	0.0941262	0.400276	4.0873	9.6587	SLC3A2;SLC7A11
Negative Regulation of Notch Signaling Pathway (GO:0045746)	2/30	6.67	0.0941262	0.400276	4.0873	9.6587	HEY1;CHAC1
Positive Regulation of Response to Wounding (GO:1903036)	2/30	6.67	0.0941262	0.400276	4.0873	9.6587	CLDN1;HBEGF
Positive Regulation of Peptidyl-Tyrosine Phosphorylation (GO:0050731)	3/63	4.76	0.0950429	0.400276	2.8648	6.742	IL6;ANGPT1;ENPP2
Extracellular Matrix Organization (GO:0030198)	6/182	3.3	0.0959031	0.400276	1.9589	4.5924	TGFB2;COL27A1;MMP1;MMP3;CTSS;MMP10
Positive Regulation of Binding (GO:0051099)	3/64	4.69	0.0985075	0.400276	2.8177	6.5303	BAMBI;TRIB3;CLIC2
Regulation of Entry of Bacterium Into Host Cell (GO:2000535)	1/6	16.67	0.0991494	0.400276	11.4244	26.4033	CXCL8
Regulation of Immature T Cell Proliferation in Thymus (GO:0033084)	1/6	16.67	0.0991494	0.400276	11.4244	26.4033	IL1B
PERK-mediated Unfolded Protein Response (GO:0036499)	1/6	16.67	0.0991494	0.400276	11.4244	26.4033	DDIT3
Regulation of Interleukin-1-Mediated Signaling Pathway (GO:2000659)	1/6	16.67	0.0991494	0.400276	11.4244	26.4033	IL6
Amino-Acid Betaine Metabolic Process (GO:0006577)	1/6	16.67	0.0991494	0.400276	11.4244	26.4033	CPT1C
Atrioventricular Valve Formation (GO:0003190)	1/6	16.67	0.0991494	0.400276	11.4244	26.4033	HEY1
Regulation of Protein Deubiquitination (GO:0090085)	1/6	16.67	0.0991494	0.400276	11.4244	26.4033	ZC3H12A
Regulation of Skeletal Muscle Satellite Cell Proliferation (GO:0014842)	1/6	16.67	0.0991494	0.400276	11.4244	26.4033	ANGPT1
Regulation of Synaptic Assembly at Neuromuscular Junction (GO:0008582)	1/6	16.67	0.0991494	0.400276	11.4244	26.4033	LIN7B
Regulation of Type B Pancreatic Cell Proliferation (GO:0061469)	1/6	16.67	0.0991494	0.400276	11.4244	26.4033	NUPR1
Regulation of Vascular Associated Smooth Muscle Cell Apoptotic Process (GO:1905459)	1/6	16.67	0.0991494	0.400276	11.4244	26.4033	SOD2
Dorsal Aorta Development (GO:0035907)	1/6	16.67	0.0991494	0.400276	11.4244	26.4033	HEY1
Dorsal Aorta Morphogenesis (GO:0035912)	1/6	16.67	0.0991494	0.400276	11.4244	26.4033	HEY1
Vascular Wound Healing (GO:0061042)	1/6	16.67	0.0991494	0.400276	11.4244	26.4033	CD34
Gland Morphogenesis (GO:0022612)	1/6	16.67	0.0991494	0.400276	11.4244	26.4033	TGFB2
Glutathione Biosynthetic Process (GO:0006750)	1/6	16.67	0.0991494	0.400276	11.4244	26.4033	GCLM
Heart Trabecula Formation (GO:0060347)	1/6	16.67	0.0991494	0.400276	11.4244	26.4033	HEY1
Interleukin-27-Mediated Signaling Pathway (GO:0070106)	1/6	16.67	0.0991494	0.400276	11.4244	26.4033	OASL
Keratinocyte Proliferation (GO:0043616)	1/6	16.67	0.0991494	0.400276	11.4244	26.4033	EREG
Leukotriene Transport (GO:0071716)	1/6	16.67	0.0991494	0.400276	11.4244	26.4033	ABCC2
Negative Regulation of Cardiac Muscle Cell Apoptotic Process (GO:0010667)	1/6	16.67	0.0991494	0.400276	11.4244	26.4033	NUPR1
Negative Regulation of Leukocyte Migration (GO:0002686)	1/6	16.67	0.0991494	0.400276	11.4244	26.4033	HMOX1
Negative Regulation of Lipase Activity (GO:0060192)	1/6	16.67	0.0991494	0.400276	11.4244	26.4033	ANGPTL4
Negative Regulation of Meiotic Nuclear Division (GO:0045835)	1/6	16.67	0.0991494	0.400276	11.4244	26.4033	RRAD
Negative Regulation of Membrane Protein Ectodomain Proteolysis (GO:0051045)	1/6	16.67	0.0991494	0.400276	11.4244	26.4033	TIMP1
Negative Regulation of Plasminogen Activation (GO:0010757)	1/6	16.67	0.0991494	0.400276	11.4244	26.4033	SERPINE1
Negative Regulation of Transporter Activity (GO:0032410)	1/6	16.67	0.0991494	0.400276	11.4244	26.4033	PPIF
Pantothenate Metabolic Process (GO:0015939)	1/6	16.67	0.0991494	0.400276	11.4244	26.4033	VNN1
Pharyngeal Arch Artery Morphogenesis (GO:0061626)	1/6	16.67	0.0991494	0.400276	11.4244	26.4033	TGFB2
Placenta Blood Vessel Development (GO:0060674)	1/6	16.67	0.0991494	0.400276	11.4244	26.4033	HEY1
Positive Regulation of Animal Organ Morphogenesis (GO:0110110)	1/6	16.67	0.0991494	0.400276	11.4244	26.4033	CD34
Positive Regulation of Autophagosome Maturation (GO:1901098)	1/6	16.67	0.0991494	0.400276	11.4244	26.4033	TOM1
Positive Regulation of Blood Circulation (GO:1903524)	1/6	16.67	0.0991494	0.400276	11.4244	26.4033	TGFB2
Positive Regulation of Gliogenesis (GO:0014015)	1/6	16.67	0.0991494	0.400276	11.4244	26.4033	IL6
Positive Regulation of Humoral Immune Response (GO:0002922)	1/6	16.67	0.0991494	0.400276	11.4244	26.4033	IL1B
Positive Regulation of Icosanoid Secretion (GO:0032305)	1/6	16.67	0.0991494	0.400276	11.4244	26.4033	IL1B
Positive Regulation of Interleukin-23 Production (GO:0032747)	1/6	16.67	0.0991494	0.400276	11.4244	26.4033	CSF2
Positive Regulation of Lamellipodium Morphogenesis (GO:2000394)	1/6	16.67	0.0991494	0.400276	11.4244	26.4033	ENPP2
Positive Regulation of Membrane Depolarization (GO:1904181)	1/6	16.67	0.0991494	0.400276	11.4244	26.4033	MLLT11
Regulation of Adiponectin Secretion (GO:0070163)	1/6	16.67	0.0991494	0.400276	11.4244	26.4033	IL1B
Regulation of Calcidiol 1-Monooxygenase Activity (GO:0060558)	1/6	16.67	0.0991494	0.400276	11.4244	26.4033	IL1B
Regulation of Macrophage Activation (GO:0043030)	2/31	6.45	0.0995141	0.400276	3.9461	9.1055	IL6;ZC3H12A
Regulation of Protein Modification Process (GO:0031399)	2/31	6.45	0.0995141	0.400276	3.9461	9.1055	SESN2;HSPB1
Negative Regulation of MAP Kinase Activity (GO:0043407)	2/31	6.45	0.0995141	0.400276	3.9461	9.1055	UCHL1;IL1B
Negative Regulation of Blood Coagulation (GO:0030195)	2/31	6.45	0.0995141	0.400276	3.9461	9.1055	SERPINB2;SERPINE1
Phosphatidic Acid Biosynthetic Process (GO:0006654)	2/31	6.45	0.0995141	0.400276	3.9461	9.1055	DGKG;LIPH
Negative Regulation of Cell Migration (GO:0030336)	6/184	3.26	0.0997235	0.400276	1.9367	4.4647	PTPRR;LIMCH1;DNAJA4;SERPINE1;HMOX1;TIMP1
Regulation of Phosphorylation (GO:0042325)	3/65	4.62	0.102023	0.40856	2.7721	6.3274	SESN2;HSPB1;EREG
Apoptotic Mitochondrial Changes (GO:0008637)	2/32	6.25	0.104986	0.413564	3.8144	8.5974	BID;SOD2
Response to Steroid Hormone (GO:0048545)	2/32	6.25	0.104986	0.413564	3.8144	8.5974	TGFB2;HSPA1B
Negative Regulation of Fat Cell Differentiation (GO:0045599)	2/32	6.25	0.104986	0.413564	3.8144	8.5974	IL6;TRIB3
Regulation of miRNA Transcription (GO:1902893)	3/66	4.55	0.105587	0.413564	2.7279	6.133	EGR1;TGFB2;IL6
Regulation of Neurogenesis (GO:0050767)	3/66	4.55	0.105587	0.413564	2.7279	6.133	IL6;HEY1;IL1B
Positive Regulation of Protein-Containing Complex Assembly (GO:0031334)	4/105	3.81	0.108325	0.413564	2.271	5.0476	CSF2;MMP1;MMP3;BID
Regulation of Protein Serine/Threonine Kinase Activity (GO:0071900)	3/67	4.48	0.1092	0.413564	2.6852	5.9465	HERC5;SERTAD1;TRIB3
Heme Metabolic Process (GO:0042168)	2/33	6.06	0.110537	0.413564	3.6912	8.1294	ABCC2;HMOX1
Regulation of Macroautophagy (GO:0016241)	4/106	3.77	0.111136	0.413564	2.2486	4.9403	UCHL1;ATP6V0B;SESN2;ATP6V0D2
Extrinsic Apoptotic Signaling Pathway (GO:0097191)	3/68	4.41	0.11286	0.413564	2.6437	5.7676	MLLT11;TGFB2;BID
ATF6-mediated Unfolded Protein Response (GO:0036500)	1/7	14.29	0.114694	0.413564	9.5199	20.6152	DDIT3
ER Overload Response (GO:0006983)	1/7	14.29	0.114694	0.413564	9.5199	20.6152	DDIT3
Regulation of Glutamate Receptor Signaling Pathway (GO:1900449)	1/7	14.29	0.114694	0.413564	9.5199	20.6152	PRNP
L-tryptophan Catabolic Process (GO:0006569)	1/7	14.29	0.114694	0.413564	9.5199	20.6152	KYNU
L-tryptophan Metabolic Process (GO:0006568)	1/7	14.29	0.114694	0.413564	9.5199	20.6152	KYNU
Regulation of Leukocyte Proliferation (GO:0070663)	1/7	14.29	0.114694	0.413564	9.5199	20.6152	CSF2
T Follicular Helper Cell Differentiation (GO:0061470)	1/7	14.29	0.114694	0.413564	9.5199	20.6152	IL6
Regulation of Neuromuscular Junction Development (GO:1904396)	1/7	14.29	0.114694	0.413564	9.5199	20.6152	LIN7B
Regulation of Nucleotide-Binding Oligomerization Domain Containing 2 Signaling Pathway (GO:0070432)	1/7	14.29	0.114694	0.413564	9.5199	20.6152	HSPA1B
Cellular Response to Granulocyte Macrophage Colony-Stimulating Factor Stimulus (GO:0097011)	1/7	14.29	0.114694	0.413564	9.5199	20.6152	CSF2
Cellular Response to Interleukin-7 (GO:0098761)	1/7	14.29	0.114694	0.413564	9.5199	20.6152	IL7R
Cellular Response to Nitric Oxide (GO:0071732)	1/7	14.29	0.114694	0.413564	9.5199	20.6152	MMP3
Cellular Response to Reactive Nitrogen Species (GO:1902170)	1/7	14.29	0.114694	0.413564	9.5199	20.6152	MMP3
Cellular Response to Thyroid Hormone Stimulus (GO:0097067)	1/7	14.29	0.114694	0.413564	9.5199	20.6152	CTSS
Response to Granulocyte Macrophage Colony-Stimulating Factor (GO:0097012)	1/7	14.29	0.114694	0.413564	9.5199	20.6152	CSF2
Dendritic Spine Maintenance (GO:0097062)	1/7	14.29	0.114694	0.413564	9.5199	20.6152	PRNP
tRNA Aminoacylation for Mitochondrial Protein Translation (GO:0070127)	1/7	14.29	0.114694	0.413564	9.5199	20.6152	GARS1
Thyroid Hormone Transport (GO:0070327)	1/7	14.29	0.114694	0.413564	9.5199	20.6152	SLC3A2
Gamma-Aminobutyric Acid Transport (GO:0015812)	1/7	14.29	0.114694	0.413564	9.5199	20.6152	SLC6A6
Glyceraldehyde-3-Phosphate Metabolic Process (GO:0019682)	1/7	14.29	0.114694	0.413564	9.5199	20.6152	TALDO1
Interleukin-7-Mediated Signaling Pathway (GO:0038111)	1/7	14.29	0.114694	0.413564	9.5199	20.6152	IL7R
Lens Fiber Cell Development (GO:0070307)	1/7	14.29	0.114694	0.413564	9.5199	20.6152	ATF4
Leukocyte Aggregation (GO:0070486)	1/7	14.29	0.114694	0.413564	9.5199	20.6152	IL1B
Locomotor Rhythm (GO:0045475)	1/7	14.29	0.114694	0.413564	9.5199	20.6152	EGR1
Maintenance of Lens Transparency (GO:0036438)	1/7	14.29	0.114694	0.413564	9.5199	20.6152	GCNT2
Negative Regulation of Fatty Acid Oxidation (GO:0046322)	1/7	14.29	0.114694	0.413564	9.5199	20.6152	SIRT4
Nucleobase-Containing Small Molecule Interconversion (GO:0015949)	1/7	14.29	0.114694	0.413564	9.5199	20.6152	GLRX
Platelet Activating Factor Metabolic Process (GO:0046469)	1/7	14.29	0.114694	0.413564	9.5199	20.6152	PLA2G4C
Positive Regulation of T-helper 2 Cell Cytokine Production (GO:2000553)	1/7	14.29	0.114694	0.413564	9.5199	20.6152	IL6
Positive Regulation of Apoptotic Cell Clearance (GO:2000427)	1/7	14.29	0.114694	0.413564	9.5199	20.6152	C3
Positive Regulation of Cardiac Epithelial to Mesenchymal Transition (GO:0062043)	1/7	14.29	0.114694	0.413564	9.5199	20.6152	TGFB2
+ Reg of Endoplasmic Reticulum Stress-Induced Intrinsic Apoptotic Sgnlng Pway (GO:1902237)	1/7	14.29	0.114694	0.413564	9.5199	20.6152	DDIT3
Positive Regulation of Epithelial Cell Apoptotic Process (GO:1904037)	1/7	14.29	0.114694	0.413564	9.5199	20.6152	IL6
Positive Regulation of Extracellular Matrix Disassembly (GO:0090091)	1/7	14.29	0.114694	0.413564	9.5199	20.6152	IL6
Positive Regulation of Microtubule Nucleation (GO:0090063)	1/7	14.29	0.114694	0.413564	9.5199	20.6152	HSPA1B
Positive Regulation of Monocyte Chemotactic Protein-1 Production (GO:0071639)	1/7	14.29	0.114694	0.413564	9.5199	20.6152	IL1B
Regulation of Aggrephagy (GO:1905335)	1/7	14.29	0.114694	0.413564	9.5199	20.6152	HSPB8
Regulation of Cellular Extravasation (GO:0002691)	1/7	14.29	0.114694	0.413564	9.5199	20.6152	ICAM1
Regulation of Developmental Growth (GO:0048638)	2/34	5.88	0.116164	0.415999	3.5756	7.6974	NRCAM;LIN7B
Regulation of Response to Biotic Stimulus (GO:0002831)	2/34	5.88	0.116164	0.415999	3.5756	7.6974	HERC5;BIRC3
Regulation of Ras Protein Signal Transduction (GO:0046578)	2/34	5.88	0.116164	0.415999	3.5756	7.6974	TGFB2;SQSTM1
Phospholipid Metabolic Process (GO:0006644)	3/69	4.35	0.116566	0.415999	2.6035	5.5958	PLPP5;PLA2G4C;ENPP2
Positive Regulation of Intracellular Protein Transport (GO:0090316)	3/69	4.35	0.116566	0.415999	2.6035	5.5958	B3GAT3;IL1B;ZC3H12A
Negative Regulation of TOR Signaling (GO:0032007)	3/70	4.29	0.120317	0.419868	2.5645	5.4307	SESN2;DDIT4;TBC1D7
Positive Regulation of Apoptotic Signaling Pathway (GO:2001235)	3/70	4.29	0.120317	0.419868	2.5645	5.4307	DDIT3;NUPR1;BID
Cellular Response to Hydrogen Peroxide (GO:0070301)	2/35	5.71	0.121861	0.419868	3.4671	7.2978	IL6;PPIF
Regulation of Vasculature Development (GO:1901342)	2/35	5.71	0.121861	0.419868	3.4671	7.2978	IL6;HMOX1
Smoothened Signaling Pathway (GO:0007224)	2/35	5.71	0.121861	0.419868	3.4671	7.2978	TMEM17;MAP3K10
Positive Regulation of Mitotic Nuclear Division (GO:0045840)	2/35	5.71	0.121861	0.419868	3.4671	7.2978	IL1B;EREG
Glycerophospholipid Biosynthetic Process (GO:0046474)	4/110	3.64	0.122695	0.419868	2.1633	4.5388	DGKG;ABHD4;LIPH;PLA2G4C
Cellular Response to Reactive Oxygen Species (GO:0034614)	3/71	4.23	0.124113	0.419868	2.5267	5.2721	IL6;MMP3;PPIF
External Encapsulating Structure Organization (GO:0045229)	4/111	3.6	0.125662	0.419868	2.143	4.4449	COL27A1;MMP1;MMP3;MMP10
Extracellular Structure Organization (GO:0043062)	4/111	3.6	0.125662	0.419868	2.143	4.4449	COL27A1;MMP1;MMP3;MMP10
Cellular Response to Amyloid-Beta (GO:1904646)	2/36	5.56	0.127625	0.419868	3.3649	6.9273	PRNP;ICAM1
Cellular Response to Vascular Endothelial Growth Factor Stimulus (GO:0035924)	2/36	5.56	0.127625	0.419868	3.3649	6.9273	HSPB1;PGF
Negative Regulation of Plasma Membrane Bounded Cell Projection Assembly (GO:0120033)	2/36	5.56	0.127625	0.419868	3.3649	6.9273	SLC48A1;TBC1D7
Negative Regulation of Smooth Muscle Cell Proliferation (GO:0048662)	2/36	5.56	0.127625	0.419868	3.3649	6.9273	HMOX1;SOD2
Phosphatidic Acid Metabolic Process (GO:0046473)	2/36	5.56	0.127625	0.419868	3.3649	6.9273	DGKG;LIPH
Positive Regulation of Epithelial Cell Migration (GO:0010634)	2/36	5.56	0.127625	0.419868	3.3649	6.9273	TGFB2;ENPP2
Autophagosome Assembly (GO:0000045)	3/72	4.17	0.127951	0.419868	2.49	5.1196	GABARAPL1;TOM1;MAP1LC3B2
Regulation of G Protein-Coupled Receptor Signaling Pathway (GO:0008277)	3/72	4.17	0.127951	0.419868	2.49	5.1196	C3;CXCL8;SYP
Regulation of Endothelial Cell Development (GO:1901550)	1/8	12.5	0.129971	0.419868	8.1595	16.649	IL1B
Regulation of Epidermis Development (GO:0045682)	1/8	12.5	0.129971	0.419868	8.1595	16.649	TMEM79
Regulation of Epithelial Cell Apoptotic Process (GO:1904035)	1/8	12.5	0.129971	0.419868	8.1595	16.649	NUPR1
Regulation of Extent of Cell Growth (GO:0061387)	1/8	12.5	0.129971	0.419868	8.1595	16.649	NRCAM
Regulation of Gap Junction Assembly (GO:1903596)	1/8	12.5	0.129971	0.419868	8.1595	16.649	IL1B
Regulation of Interleukin-23 Production (GO:0032667)	1/8	12.5	0.129971	0.419868	8.1595	16.649	CSF2
Aromatic Amino Acid Transport (GO:0015801)	1/8	12.5	0.129971	0.419868	8.1595	16.649	SLC3A2
Autophagosome-Lysosome Fusion (GO:0061909)	1/8	12.5	0.129971	0.419868	8.1595	16.649	TOM1
Cardioblast Differentiation (GO:0010002)	1/8	12.5	0.129971	0.419868	8.1595	16.649	TGFB2
Regulation of Urine Volume (GO:0035809)	1/8	12.5	0.129971	0.419868	8.1595	16.649	ADM
Chondroitin Sulfate Proteoglycan Biosynthetic Process (GO:0050650)	1/8	12.5	0.129971	0.419868	8.1595	16.649	B3GAT3
Chondroitin Sulfate Proteoglycan Metabolic Process (GO:0050654)	1/8	12.5	0.129971	0.419868	8.1595	16.649	B3GAT3
Response to Thyroid Hormone (GO:0097066)	1/8	12.5	0.129971	0.419868	8.1595	16.649	CTSS
Response to Vitamin (GO:0033273)	1/8	12.5	0.129971	0.419868	8.1595	16.649	KYNU
Dicarboxylic Acid Biosynthetic Process (GO:0043650)	1/8	12.5	0.129971	0.419868	8.1595	16.649	KYNU
Synapse Pruning (GO:0098883)	1/8	12.5	0.129971	0.419868	8.1595	16.649	C3
Galactose Catabolic Process (GO:0019388)	1/8	12.5	0.129971	0.419868	8.1595	16.649	GALM
Ventricular Trabecula Myocardium Morphogenesis (GO:0003222)	1/8	12.5	0.129971	0.419868	8.1595	16.649	TGFB2
Vitamin K Metabolic Process (GO:0042373)	1/8	12.5	0.129971	0.419868	8.1595	16.649	NQO1
Glutamine Transport (GO:0006868)	1/8	12.5	0.129971	0.419868	8.1595	16.649	SLC1A5
Kynurenine Metabolic Process (GO:0070189)	1/8	12.5	0.129971	0.419868	8.1595	16.649	KYNU
Lipid Phosphorylation (GO:0046834)	1/8	12.5	0.129971	0.419868	8.1595	16.649	DGKG
Multi-Pass Transmembrane Protein Insertion Into ER Membrane (GO:0160063)	1/8	12.5	0.129971	0.419868	8.1595	16.649	RAB5IF
Negative Regulation of Nitric Oxide Biosynthetic Process (GO:0045019)	1/8	12.5	0.129971	0.419868	8.1595	16.649	ZC3H12A
Negative Regulation of Nitric Oxide Metabolic Process (GO:1904406)	1/8	12.5	0.129971	0.419868	8.1595	16.649	ZC3H12A
- Reg of Oxidative Stress-Induced Neuron Intrinsic Apoptotic Sgnlng Pway (GO:1903377)	1/8	12.5	0.129971	0.419868	8.1595	16.649	ATF4
Negative Regulation of Ryanodine-Sensitive Calcium-Release Channel Activity (GO:0060315)	1/8	12.5	0.129971	0.419868	8.1595	16.649	CLIC2
Neuronal Ion Channel Clustering (GO:0045161)	1/8	12.5	0.129971	0.419868	8.1595	16.649	NRCAM
+ Reg of Blood Vessel Endothelial Cell Proliferation Inv in Sprouting Angiogenesis (GO:1903589)	1/8	12.5	0.129971	0.419868	8.1595	16.649	HMOX1
Positive Regulation of Immune Response to Tumor Cell (GO:0002839)	1/8	12.5	0.129971	0.419868	8.1595	16.649	SLC48A1
Positive Regulation of Membrane Invagination (GO:1905155)	1/8	12.5	0.129971	0.419868	8.1595	16.649	C3
Proline Transport (GO:0015824)	1/8	12.5	0.129971	0.419868	8.1595	16.649	SLC3A2
Protein Localization to Perinuclear Region of Cytoplasm (GO:1905719)	1/8	12.5	0.129971	0.419868	8.1595	16.649	SQSTM1
Negative Regulation of Cellular Response to Growth Factor Stimulus (GO:0090288)	3/73	4.11	0.131831	0.422736	2.4543	4.9729	TNFAIP6;BAMBI;HTRA3
Negative Regulation of Epithelial Cell Proliferation (GO:0050680)	3/73	4.11	0.131831	0.422736	2.4543	4.9729	TGFB2;NUPR1;EREG
Positive Regulation of Protein Transport (GO:0051222)	3/73	4.11	0.131831	0.422736	2.4543	4.9729	TGFB2;B3GAT3;ANKRD1
Regulation of MAP Kinase Activity (GO:0043405)	3/73	4.11	0.131831	0.422736	2.4543	4.9729	UCHL1;IL1B;TRIB3
Negative Regulation of Endothelial Cell Migration (GO:0010596)	2/37	5.41	0.133452	0.42493	3.2686	6.5831	SLC48A1;DNAJA4
Positive Regulation of Myeloid Cell Differentiation (GO:0045639)	2/37	5.41	0.133452	0.42493	3.2686	6.5831	CSF3;HSPA1B
Regulation of Interleukin-6 Production (GO:0032675)	4/114	3.51	0.134743	0.42493	2.0842	4.1776	IL6;IL1B;ZC3H12A;EREG
DNA Damage Checkpoint Signaling (GO:0000077)	2/38	5.26	0.139338	0.42493	3.1777	6.2627	RRAD;FBXO6
L-alpha-amino Acid Transmembrane Transport (GO:1902475)	2/38	5.26	0.139338	0.42493	3.1777	6.2627	SLC3A2;SLC7A11
O-glycan Processing (GO:0016266)	2/38	5.26	0.139338	0.42493	3.1777	6.2627	GCNT3;ST6GALNAC4
Ventricular Septum Development (GO:0003281)	2/38	5.26	0.139338	0.42493	3.1777	6.2627	TGFB2;HEY1
Positive Regulation of Protein Binding (GO:0032092)	2/38	5.26	0.139338	0.42493	3.1777	6.2627	BAMBI;TRIB3
Positive Regulation of Receptor Signaling Pathway via JAK-STAT (GO:0046427)	2/38	5.26	0.139338	0.42493	3.1777	6.2627	IL6;IL7R
Regulation of Fat Cell Differentiation (GO:0045598)	3/75	4	0.139713	0.42493	2.3858	4.6957	IL6;ZC3H12A;TRIB3
Positive Regulation of Secretion by Cell (GO:1903532)	3/75	4	0.139713	0.42493	2.3858	4.6957	TGFB2;IL1B;ANKRD1
Transforming Growth Factor Beta Receptor Signaling Pathway (GO:0007179)	3/76	3.95	0.143713	0.42493	2.353	4.5648	TGFB2;BAMBI;GCNT2
Positive Regulation of Protein Localization to Membrane (GO:1905477)	3/76	3.95	0.143713	0.42493	2.353	4.5648	PRNP;TNFAIP6;SQSTM1
Regulation of Notch Signaling Pathway (GO:0008593)	3/76	3.95	0.143713	0.42493	2.353	4.5648	TGFB2;HEY1;CHAC1
Regulation of Complement-Dependent Cytotoxicity (GO:1903659)	1/9	11.11	0.144985	0.42493	7.1392	13.7867	TGFB2
Regulation of Dendritic Spine Maintenance (GO:1902950)	1/9	11.11	0.144985	0.42493	7.1392	13.7867	PRNP
Golgi Lumen Acidification (GO:0061795)	1/9	11.11	0.144985	0.42493	7.1392	13.7867	ATP6V0B
L-leucine Transport (GO:0015820)	1/9	11.11	0.144985	0.42493	7.1392	13.7867	SLC3A2
SNARE Complex Assembly (GO:0035493)	1/9	11.11	0.144985	0.42493	7.1392	13.7867	VAMP1
Regulation of Leukocyte Mediated Cytotoxicity (GO:0001910)	1/9	11.11	0.144985	0.42493	7.1392	13.7867	ICAM1
T-helper 17 Cell Lineage Commitment (GO:0072540)	1/9	11.11	0.144985	0.42493	7.1392	13.7867	IL6
[2Fe-2S] Cluster Assembly (GO:0044571)	1/9	11.11	0.144985	0.42493	7.1392	13.7867	HSCB
Aggrephagy (GO:0035973)	1/9	11.11	0.144985	0.42493	7.1392	13.7867	SQSTM1
Regulation of Odontoblast Differentiation (GO:1901329)	1/9	11.11	0.144985	0.42493	7.1392	13.7867	SERPINE1
Regulation of Translation in Response to Endoplasmic Reticulum Stress (GO:0036490)	1/9	11.11	0.144985	0.42493	7.1392	13.7867	SESN2
Regulation of Transmembrane Transporter Activity (GO:0022898)	1/9	11.11	0.144985	0.42493	7.1392	13.7867	PPIF
Regulation of Vascular Wound Healing (GO:0061043)	1/9	11.11	0.144985	0.42493	7.1392	13.7867	SERPINE1
Chloride Ion Homeostasis (GO:0055064)	1/9	11.11	0.144985	0.42493	7.1392	13.7867	SLC12A8
Serine Family Amino Acid Catabolic Process (GO:0009071)	1/9	11.11	0.144985	0.42493	7.1392	13.7867	SDSL
Hormone Transport (GO:0009914)	1/9	11.11	0.144985	0.42493	7.1392	13.7867	SLC3A2
Intestinal Cholesterol Absorption (GO:0030299)	1/9	11.11	0.144985	0.42493	7.1392	13.7867	AKR1C1
Mitochondrial Respirasome Assembly (GO:0097250)	1/9	11.11	0.144985	0.42493	7.1392	13.7867	RAB5IF
Monoatomic Anion Homeostasis (GO:0055081)	1/9	11.11	0.144985	0.42493	7.1392	13.7867	SLC12A8
Myeloid Leukocyte Mediated Immunity (GO:0002444)	1/9	11.11	0.144985	0.42493	7.1392	13.7867	IL6
Negative Regulation of T-helper Cell Differentiation (GO:0045623)	1/9	11.11	0.144985	0.42493	7.1392	13.7867	ZC3H12A
Negative Regulation of Bone Resorption (GO:0045779)	1/9	11.11	0.144985	0.42493	7.1392	13.7867	IL6
Negative Regulation of Hormone Secretion (GO:0046888)	1/9	11.11	0.144985	0.42493	7.1392	13.7867	IL1B
Negative Regulation of Muscle Cell Differentiation (GO:0051148)	1/9	11.11	0.144985	0.42493	7.1392	13.7867	HEY1
Negative Regulation of Necroptotic Process (GO:0060546)	1/9	11.11	0.144985	0.42493	7.1392	13.7867	BIRC3
Negative Regulation of Release of Sequestered Calcium Ion Into Cytosol (GO:0051280)	1/9	11.11	0.144985	0.42493	7.1392	13.7867	CLIC2
Negative Regulation of Striated Muscle Cell Apoptotic Process (GO:0010664)	1/9	11.11	0.144985	0.42493	7.1392	13.7867	NUPR1
Neuron Remodeling (GO:0016322)	1/9	11.11	0.144985	0.42493	7.1392	13.7867	C3
Positive Regulation of Cardiocyte Differentiation (GO:1905209)	1/9	11.11	0.144985	0.42493	7.1392	13.7867	TGFB2
Positive Regulation of Epidermis Development (GO:0045684)	1/9	11.11	0.144985	0.42493	7.1392	13.7867	TMEM79
Positive Regulation of Mitochondrial Membrane Permeability (GO:0035794)	1/9	11.11	0.144985	0.42493	7.1392	13.7867	PPIF
Positive Regulation of Phagocytosis, Engulfment (GO:0060100)	1/9	11.11	0.144985	0.42493	7.1392	13.7867	C3
Positive Regulation of Tissue Remodeling (GO:0034105)	1/9	11.11	0.144985	0.42493	7.1392	13.7867	SLC48A1
Positive Regulation of Vasculogenesis (GO:2001214)	1/9	11.11	0.144985	0.42493	7.1392	13.7867	CD34
Progesterone Metabolic Process (GO:0042448)	1/9	11.11	0.144985	0.42493	7.1392	13.7867	AKR1C3
Purine Nucleobase Transport (GO:0006863)	1/9	11.11	0.144985	0.42493	7.1392	13.7867	SLC28A3
Regulation of Calcium Ion Import Across Plasma Membrane (GO:1905664)	1/9	11.11	0.144985	0.42493	7.1392	13.7867	PRNP
Positive Regulation of Interleukin-6 Production (GO:0032755)	3/77	3.9	0.14775	0.431579	2.3211	4.4385	IL6;IL1B;EREG
Regulation of BMP Signaling Pathway (GO:0030510)	3/77	3.9	0.14775	0.431579	2.3211	4.4385	TNFAIP6;BAMBI;HTRA3
Negative Regulation of Protein Secretion (GO:0050709)	2/40	5	0.151272	0.432679	3.0101	5.6852	IL1B;SIRT4
Regulation of Protein Binding (GO:0043393)	3/78	3.85	0.151824	0.432679	2.2901	4.3168	BAMBI;XIRP1;TRIB3
Positive Regulation of Macroautophagy (GO:0016239)	3/78	3.85	0.151824	0.432679	2.2901	4.3168	HSPB8;SESN2;TOM1
Regulation of Protein Import Into Nucleus (GO:0042306)	2/41	4.88	0.157312	0.432679	2.9328	5.4243	NFKBIA;ZC3H12A
Visual System Development (GO:0150063)	2/41	4.88	0.157312	0.432679	2.9328	5.4243	C3;TGFB2
Negative Regulation of DNA Metabolic Process (GO:0051053)	2/41	4.88	0.157312	0.432679	2.9328	5.4243	TSPYL2;ANKRD1
Negative Regulation of Kinase Activity (GO:0033673)	2/41	4.88	0.157312	0.432679	2.9328	5.4243	HSPB1;TRIB3
Odontogenesis (GO:0042476)	2/41	4.88	0.157312	0.432679	2.9328	5.4243	TGFB2;TUFT1
Positive Regulation of Actin Filament Polymerization (GO:0030838)	2/41	4.88	0.157312	0.432679	2.9328	5.4243	CSF3;CCL26
Regulation of Complement Activation (GO:0030449)	1/10	10	0.15974	0.432679	6.3456	11.6392	IL1B
Regulation of Lamellipodium Morphogenesis (GO:2000392)	1/10	10	0.15974	0.432679	6.3456	11.6392	ENPP2
T-helper 17 Cell Differentiation (GO:0072539)	1/10	10	0.15974	0.432679	6.3456	11.6392	IL6
Regulation of Monocyte Chemotactic Protein-1 Production (GO:0071637)	1/10	10	0.15974	0.432679	6.3456	11.6392	IL1B
Angiogenesis Involved in Wound Healing (GO:0060055)	1/10	10	0.15974	0.432679	6.3456	11.6392	CD34
Regulation of Phagocytosis, Engulfment (GO:0060099)	1/10	10	0.15974	0.432679	6.3456	11.6392	C3
Atrial Septum Morphogenesis (GO:0060413)	1/10	10	0.15974	0.432679	6.3456	11.6392	TGFB2
Basement Membrane Organization (GO:0071711)	1/10	10	0.15974	0.432679	6.3456	11.6392	CTSS
Branched-Chain Amino Acid Transport (GO:0015803)	1/10	10	0.15974	0.432679	6.3456	11.6392	SLC3A2
Cellular Response to Prostaglandin Stimulus (GO:0071379)	1/10	10	0.15974	0.432679	6.3456	11.6392	AKR1C3
Cytolysis by Host of Symbiont Cells (GO:0051838)	1/10	10	0.15974	0.432679	6.3456	11.6392	SLC48A1
Embryonic Appendage Morphogenesis (GO:0035113)	1/10	10	0.15974	0.432679	6.3456	11.6392	TGFB2
tRNA Threonylcarbamoyladenosine Metabolic Process (GO:0070525)	1/10	10	0.15974	0.432679	6.3456	11.6392	YRDC
Erythrose 4-Phosphate/Phosphoenolpyruvate Family Amino Acid Catabolic Process (GO:1902222)	1/10	10	0.15974	0.432679	6.3456	11.6392	KYNU
Ether Lipid Biosynthetic Process (GO:0008611)	1/10	10	0.15974	0.432679	6.3456	11.6392	PLA2G4C
Galactose Metabolic Process (GO:0006012)	1/10	10	0.15974	0.432679	6.3456	11.6392	GALM
miRNA Catabolic Process (GO:0010587)	1/10	10	0.15974	0.432679	6.3456	11.6392	ZC3H12A
Modulation by Symbiont of Entry Into Host (GO:0052372)	1/10	10	0.15974	0.432679	6.3456	11.6392	CXCL8
Negative Regulation by Host of Viral Genome Replication (GO:0044828)	1/10	10	0.15974	0.432679	6.3456	11.6392	ZC3H12A
Negative Regulation of T-helper 17 Cell Differentiation (GO:2000320)	1/10	10	0.15974	0.432679	6.3456	11.6392	ZC3H12A
Negative Regulation of Activated T Cell Proliferation (GO:0046007)	1/10	10	0.15974	0.432679	6.3456	11.6392	PRNP
Negative Regulation of Autophagosome Assembly (GO:1902902)	1/10	10	0.15974	0.432679	6.3456	11.6392	NUPR1
Negative Regulation of Cholesterol Transport (GO:0032375)	1/10	10	0.15974	0.432679	6.3456	11.6392	NFKBIA
Negative Regulation of Inclusion Body Assembly (GO:0090084)	1/10	10	0.15974	0.432679	6.3456	11.6392	HSPA1B
Negative Regulation of Interferon-Beta Production (GO:0032688)	1/10	10	0.15974	0.432679	6.3456	11.6392	RELB
Negative Regulation of Interleukin-17 Production (GO:0032700)	1/10	10	0.15974	0.432679	6.3456	11.6392	PRNP
Negative Regulation of Protein Import Into Nucleus (GO:0042308)	1/10	10	0.15974	0.432679	6.3456	11.6392	NFKBIA
Negative Regulation of Smooth Muscle Cell Differentiation (GO:0051151)	1/10	10	0.15974	0.432679	6.3456	11.6392	HEY1
Negative Regulation of Systemic Arterial Blood Pressure (GO:0003085)	1/10	10	0.15974	0.432679	6.3456	11.6392	SOD2
Negative Regulation of Vascular Endothelial Growth Factor Signaling Pathway (GO:1900747)	1/10	10	0.15974	0.432679	6.3456	11.6392	SLC48A1
Neuron Projection Fasciculation (GO:0106030)	1/10	10	0.15974	0.432679	6.3456	11.6392	NRCAM
Positive Regulation of RIG-I Signaling Pathway (GO:1900246)	1/10	10	0.15974	0.432679	6.3456	11.6392	OASL
Positive Regulation of T-helper 17 Cell Differentiation (GO:2000321)	1/10	10	0.15974	0.432679	6.3456	11.6392	NFKBIZ
Positive Regulation of Cell Morphogenesis (GO:0010770)	1/10	10	0.15974	0.432679	6.3456	11.6392	CDKL3
Positive Regulation of Hemostasis (GO:1900048)	1/10	10	0.15974	0.432679	6.3456	11.6392	SERPINE1
Regulation of T-helper 2 Cell Cytokine Production (GO:2000551)	1/10	10	0.15974	0.432679	6.3456	11.6392	IL6
Regulation of Amyloid Precursor Protein Biosynthetic Process (GO:0042984)	1/10	10	0.15974	0.432679	6.3456	11.6392	NECAB3
Response to Tumor Necrosis Factor (GO:0034612)	3/80	3.75	0.160076	0.432679	2.2303	4.0862	CXCL8;ZC3H12A;ANKRD1
Regulation of TOR Signaling (GO:0032006)	3/80	3.75	0.160076	0.432679	2.2303	4.0862	SESN2;DDIT4;TBC1D7
Lipid Metabolic Process (GO:0006629)	7/259	2.7	0.161855	0.43556	1.5946	2.9038	DGKG;PLPP5;TPRA1;LIPH;PLA2G4C;AKR1C3;CPT1C
Regulation of Glycolytic Process (GO:0006110)	2/42	4.76	0.163398	0.43556	2.8593	5.1799	UCHL1;NUPR1
Notch Signaling Pathway (GO:0007219)	2/42	4.76	0.163398	0.43556	2.8593	5.1799	HEY1;DTX2
Regulation of Receptor-Mediated Endocytosis (GO:0048259)	2/42	4.76	0.163398	0.43556	2.8593	5.1799	C3;SERPINE1
Cardiac Ventricle Morphogenesis (GO:0003208)	2/42	4.76	0.163398	0.43556	2.8593	5.1799	TGFB2;HEY1
Digestive Tract Development (GO:0048565)	2/42	4.76	0.163398	0.43556	2.8593	5.1799	TGFB2;CXCL8
Keratinocyte Differentiation (GO:0030216)	2/42	4.76	0.163398	0.43556	2.8593	5.1799	AKR1C3;EREG
Lipid Catabolic Process (GO:0016042)	2/42	4.76	0.163398	0.43556	2.8593	5.1799	LIPH;ENPP2
Positive Regulation of Receptor Signaling Pathway via STAT (GO:1904894)	2/42	4.76	0.163398	0.43556	2.8593	5.1799	IL6;IL7R
Positive Regulation of JNK Cascade (GO:0046330)	3/81	3.7	0.164253	0.436358	2.2016	3.9769	GADD45B;IL1B;MAP3K10
Positive Regulation of Organelle Organization (GO:0010638)	3/81	3.7	0.164253	0.436358	2.2016	3.9769	MLLT11;TOM1;BID
mRNA Transcription (GO:0009299)	2/43	4.65	0.169524	0.436358	2.7894	4.9506	EREG;ATF4
Negative Regulation of Organelle Assembly (GO:1902116)	2/43	4.65	0.169524	0.436358	2.7894	4.9506	TBC1D7;NUPR1
Negative Regulation of Protein Phosphorylation (GO:0001933)	3/83	3.61	0.172702	0.436358	2.1464	3.7695	ZC3H12A;HSPB1;TRIB3
Regulation of T Cell Proliferation (GO:0042129)	3/83	3.61	0.172702	0.436358	2.1464	3.7695	IL6;IL1B;TNFSF8
Regulation of Protein-Containing Complex Assembly (GO:0043254)	4/126	3.17	0.173528	0.436358	1.8781	3.2893	SLC48A1;MMP1;MMP3;BID
Regulation of Glycoprotein Biosynthetic Process (GO:0010559)	1/11	9.09	0.174242	0.436358	5.7108	9.9785	NECAB3
MyD88-independent Toll-Like Receptor Signaling Pathway (GO:0002756)	1/11	9.09	0.174242	0.436358	5.7108	9.9785	TNIP3
Regulation of Mitochondrial Depolarization (GO:0051900)	1/11	9.09	0.174242	0.436358	5.7108	9.9785	MLLT11
Regulation of Smooth Muscle Cell Differentiation (GO:0051150)	1/11	9.09	0.174242	0.436358	5.7108	9.9785	HEY1
Carnitine Metabolic Process (GO:0009437)	1/11	9.09	0.174242	0.436358	5.7108	9.9785	CPT1C
Catecholamine Biosynthetic Process (GO:0042423)	1/11	9.09	0.174242	0.436358	5.7108	9.9785	TGFB2
Cellular Response to L-leucine (GO:0071233)	1/11	9.09	0.174242	0.436358	5.7108	9.9785	SESN2
Cellular Response to Leucine Starvation (GO:1990253)	1/11	9.09	0.174242	0.436358	5.7108	9.9785	SESN2
Response to L-leucine (GO:0043201)	1/11	9.09	0.174242	0.436358	5.7108	9.9785	SESN2
Response to Nitric Oxide (GO:0071731)	1/11	9.09	0.174242	0.436358	5.7108	9.9785	MMP3
Endosomal Lumen Acidification (GO:0048388)	1/11	9.09	0.174242	0.436358	5.7108	9.9785	ATP6V0B
Tricarboxylic Acid Metabolic Process (GO:0072350)	1/11	9.09	0.174242	0.436358	5.7108	9.9785	SIRT4
Hematopoietic Stem Cell Proliferation (GO:0071425)	1/11	9.09	0.174242	0.436358	5.7108	9.9785	CD34
Intestinal Lipid Absorption (GO:0098856)	1/11	9.09	0.174242	0.436358	5.7108	9.9785	AKR1C1
Monocyte Differentiation (GO:0030224)	1/11	9.09	0.174242	0.436358	5.7108	9.9785	PIR
Negative Regulation of D-glucose Transmembrane Transport (GO:0010829)	1/11	9.09	0.174242	0.436358	5.7108	9.9785	IL1B
Negative Regulation of Bone Remodeling (GO:0046851)	1/11	9.09	0.174242	0.436358	5.7108	9.9785	IL6
Negative Regulation of calcineurin-NFAT Signaling Cascade (GO:0070885)	1/11	9.09	0.174242	0.436358	5.7108	9.9785	PRNP
Negative Regulation of Calcineurin-Mediated Signaling (GO:0106057)	1/11	9.09	0.174242	0.436358	5.7108	9.9785	PRNP
Negative Regulation of Epithelial Cell Apoptotic Process (GO:1904036)	1/11	9.09	0.174242	0.436358	5.7108	9.9785	NUPR1
Negative Regulation of Glycolytic Process (GO:0045820)	1/11	9.09	0.174242	0.436358	5.7108	9.9785	NUPR1
Negative Regulation of Heart Contraction (GO:0045822)	1/11	9.09	0.174242	0.436358	5.7108	9.9785	ZC3H12A
Negative Regulation of Purine Nucleotide Catabolic Process (GO:0033122)	1/11	9.09	0.174242	0.436358	5.7108	9.9785	NUPR1
Neuron Projection Maintenance (GO:1990535)	1/11	9.09	0.174242	0.436358	5.7108	9.9785	PRNP
Pentose-Phosphate Shunt (GO:0006098)	1/11	9.09	0.174242	0.436358	5.7108	9.9785	TALDO1
Phosphatidylethanolamine Acyl-Chain Remodeling (GO:0036152)	1/11	9.09	0.174242	0.436358	5.7108	9.9785	PLA2G4C
Positive Regulation of Execution Phase of Apoptosis (GO:1900119)	1/11	9.09	0.174242	0.436358	5.7108	9.9785	ZC3H12A
Positive Regulation of Gene Expression via Chromosomal CpG Island Demethylation (GO:0044029)	1/11	9.09	0.174242	0.436358	5.7108	9.9785	EGR1
Positive Regulation of mRNA Metabolic Process (GO:1903313)	1/11	9.09	0.174242	0.436358	5.7108	9.9785	ZC3H12A
Positive Regulation of Platelet Aggregation (GO:1901731)	1/11	9.09	0.174242	0.436358	5.7108	9.9785	IL6
Positive Regulation of Smooth Muscle Cell Apoptotic Process (GO:0034393)	1/11	9.09	0.174242	0.436358	5.7108	9.9785	SOD2
Positive Regulation of Vascular Endothelial Growth Factor Receptor Signaling Pathway (GO:0030949)	1/11	9.09	0.174242	0.436358	5.7108	9.9785	IL1B
Primary Alcohol Catabolic Process (GO:0034310)	1/11	9.09	0.174242	0.436358	5.7108	9.9785	AKR1C3
Regulation of T Cell Mediated Immunity (GO:0002709)	1/11	9.09	0.174242	0.436358	5.7108	9.9785	IL1B
Regulation of Cardiac Muscle Cell Apoptotic Process (GO:0010665)	1/11	9.09	0.174242	0.436358	5.7108	9.9785	NUPR1
Positive Regulation of MAPK Cascade (GO:0043410)	9/362	2.49	0.175485	0.438718	1.4646	2.5488	TGFB2;IL6;GADD45B;ANGPT1;IL1B;ZC3H12A;GCNT2;MAP3K10;ICAM1
Regulated Exocytosis (GO:0045055)	2/44	4.55	0.175689	0.438718	2.7229	4.7352	SYNGR2;TMEM79
Monocarboxylic Acid Metabolic Process (GO:0032787)	4/127	3.15	0.176921	0.441159	1.8627	3.2263	VNN1;KYNU;AKR1C1;CPT1C
Long-Chain Fatty Acid Metabolic Process (GO:0001676)	3/85	3.53	0.181271	0.442706	2.0938	3.5757	PLA2G4C;ACSL5;PTGR1
Regulation of Nervous System Development (GO:0051960)	2/45	4.44	0.181889	0.442706	2.6594	4.5326	HEY1;IL1B
Regulation of Nitric Oxide Biosynthetic Process (GO:0045428)	2/45	4.44	0.181889	0.442706	2.6594	4.5326	IL1B;ZC3H12A
Negative Regulation of BMP Signaling Pathway (GO:0030514)	2/45	4.44	0.181889	0.442706	2.6594	4.5326	TNFAIP6;HTRA3
Negative Regulation of Biosynthetic Process (GO:0009890)	2/45	4.44	0.181889	0.442706	2.6594	4.5326	IL6;ZC3H12A
Regulation of Cell Growth (GO:0001558)	6/222	2.7	0.186298	0.442706	1.5928	2.6766	TSPYL2;SLC48A1;TGFB2;SESN2;OSGIN1;HSPA1B
Regulation of Cyclin-Dependent Protein Serine/Threonine Kinase Activity (GO:0000079)	2/46	4.35	0.18812	0.442706	2.5989	4.3418	HERC5;SERTAD1
Regulation of Osteoclast Differentiation (GO:0045670)	2/46	4.35	0.18812	0.442706	2.5989	4.3418	TM4SF19;TNFAIP6
Development of Primary Male Sexual Characteristics (GO:0046546)	2/46	4.35	0.18812	0.442706	2.5989	4.3418	TGFB2;AKR1C3
Macromolecule Catabolic Process (GO:0009057)	2/46	4.35	0.18812	0.442706	2.5989	4.3418	UCHL1;SQSTM1
Male Gonad Development (GO:0008584)	2/46	4.35	0.18812	0.442706	2.5989	4.3418	TGFB2;AKR1C3
Negative Regulation of Protein Serine/Threonine Kinase Activity (GO:0071901)	2/46	4.35	0.18812	0.442706	2.5989	4.3418	UCHL1;IL1B
Positive Regulation of Nucleocytoplasmic Transport (GO:0046824)	2/46	4.35	0.18812	0.442706	2.5989	4.3418	IL1B;ZC3H12A
NADPH Regeneration (GO:0006740)	1/12	8.33	0.188494	0.442706	5.1913	8.6627	ALDH1L2
Regulation of Leukocyte Adhesion to Vascular Endothelial Cell (GO:1904994)	1/12	8.33	0.188494	0.442706	5.1913	8.6627	IL6
T-helper Cell Lineage Commitment (GO:0002295)	1/12	8.33	0.188494	0.442706	5.1913	8.6627	IL6
Alanine Transport (GO:0032328)	1/12	8.33	0.188494	0.442706	5.1913	8.6627	SLC6A6
Regulation of Myoblast Fusion (GO:1901739)	1/12	8.33	0.188494	0.442706	5.1913	8.6627	TMEM182
Axonal Fasciculation (GO:0007413)	1/12	8.33	0.188494	0.442706	5.1913	8.6627	NRCAM
Regulation of Short-Term Neuronal Synaptic Plasticity (GO:0048172)	1/12	8.33	0.188494	0.442706	5.1913	8.6627	SYP
Reg of Single Stranded Viral RNA Replication via Double Stranded DNA Intermediate (GO:0045091)	1/12	8.33	0.188494	0.442706	5.1913	8.6627	CXCL8
Cellular Component Maintenance (GO:0043954)	1/12	8.33	0.188494	0.442706	5.1913	8.6627	PRNP
Regulation of Transforming Growth Factor Beta Production (GO:0071634)	1/12	8.33	0.188494	0.442706	5.1913	8.6627	TGFB2
Regulation of Tube Diameter (GO:0035296)	1/12	8.33	0.188494	0.442706	5.1913	8.6627	GCLM
Endothelium Development (GO:0003158)	1/12	8.33	0.188494	0.442706	5.1913	8.6627	CD34
tRNA 5'-Leader Removal (GO:0001682)	1/12	8.33	0.188494	0.442706	5.1913	8.6627	RPP25L
Vascular Process in Circulatory System (GO:0003018)	1/12	8.33	0.188494	0.442706	5.1913	8.6627	GCLM
Glutamine Metabolic Process (GO:0006541)	1/12	8.33	0.188494	0.442706	5.1913	8.6627	SIRT4
Glycerolipid Metabolic Process (GO:0046486)	1/12	8.33	0.188494	0.442706	5.1913	8.6627	DGKG
Granulocyte Differentiation (GO:0030851)	1/12	8.33	0.188494	0.442706	5.1913	8.6627	CSF3
Interleukin-6-Mediated Signaling Pathway (GO:0070102)	1/12	8.33	0.188494	0.442706	5.1913	8.6627	IL6
Negative Regulation of Chemotaxis (GO:0050922)	1/12	8.33	0.188494	0.442706	5.1913	8.6627	SLC48A1
Negative Regulation of Hemostasis (GO:1900047)	1/12	8.33	0.188494	0.442706	5.1913	8.6627	SERPINE1
Negative Regulation of Macrophage Derived Foam Cell Differentiation (GO:0010745)	1/12	8.33	0.188494	0.442706	5.1913	8.6627	NFKBIA
Negative Regulation of Vascular Permeability (GO:0043116)	1/12	8.33	0.188494	0.442706	5.1913	8.6627	ANGPT1
Positive Regulation of T-helper 1 Type Immune Response (GO:0002827)	1/12	8.33	0.188494	0.442706	5.1913	8.6627	IL1B
Positive Regulation of T-helper Cell Differentiation (GO:0045624)	1/12	8.33	0.188494	0.442706	5.1913	8.6627	NFKBIZ
Positive Regulation of Cellular Extravasation (GO:0002693)	1/12	8.33	0.188494	0.442706	5.1913	8.6627	ICAM1
Positive Regulation of Granulocyte Macrophage Colony-Stimulating Factor Production (GO:0032725)	1/12	8.33	0.188494	0.442706	5.1913	8.6627	IL1B
Potassium Ion Export Across Plasma Membrane (GO:0097623)	1/12	8.33	0.188494	0.442706	5.1913	8.6627	KCNE4
Proteinogenic Amino Acid Metabolic Process (GO:0170039)	1/12	8.33	0.188494	0.442706	5.1913	8.6627	PSPH
Regulation of T Cell Differentiation in Thymus (GO:0033081)	1/12	8.33	0.188494	0.442706	5.1913	8.6627	VNN1
Regulation of Astrocyte Differentiation (GO:0048710)	1/12	8.33	0.188494	0.442706	5.1913	8.6627	IL6
Defense Response to Gram-negative Bacterium (GO:0050829)	3/87	3.45	0.189953	0.444929	2.0438	3.3946	IL6;SERPINE1;ADM
Positive Regulation of Biosynthetic Process (GO:0009891)	3/87	3.45	0.189953	0.444929	2.0438	3.3946	EGR1;IL1B;SIRT4
Proteolysis (GO:0006508)	8/321	2.49	0.192035	0.449202	1.467	2.4206	MMP1;HTRA3;MMP3;CASP1;FBXO6;CTSW;PRSS3;CTSS
Regulation of Response to External Stimulus (GO:0032101)	4/132	3.03	0.194213	0.449846	1.7895	2.9326	HERC5;SLC48A1;CASP1;BIRC3
Regulation of Endothelial Cell Migration (GO:0010594)	3/88	3.41	0.194333	0.449846	2.0196	3.3085	ANGPT1;DNAJA4;ZC3H12A
Positive Regulation of Endothelial Cell Migration (GO:0010595)	3/88	3.41	0.194333	0.449846	2.0196	3.3085	ANGPT1;ZC3H12A;HSPB1
DNA Integrity Checkpoint Signaling (GO:0031570)	2/47	4.26	0.194381	0.449846	2.541	4.162	RRAD;FBXO6
Cell Surface Receptor Signaling Pathway via JAK-STAT (GO:0007259)	2/47	4.26	0.194381	0.449846	2.541	4.162	IL6;CSF2
Monoatomic Anion Transport (GO:0006820)	2/47	4.26	0.194381	0.449846	2.541	4.162	PACC1;CLIC2
Negative Regulation of Cold-Induced Thermogenesis (GO:0120163)	2/47	4.26	0.194381	0.449846	2.541	4.162	DDIT3;ATF4
Positive Regulation of Cytokine-Mediated Signaling Pathway (GO:0001961)	2/47	4.26	0.194381	0.449846	2.541	4.162	CASP1;HSPA1B
Cellular Response to Chemokine (GO:1990869)	2/48	4.17	0.200668	0.45006	2.4856	3.9922	ZC3H12A;CCL26
Endoplasmic Reticulum Unfolded Protein Response (GO:0030968)	2/48	4.17	0.200668	0.45006	2.4856	3.9922	DDIT3;ATF4
Erythrocyte Differentiation (GO:0030218)	2/48	4.17	0.200668	0.45006	2.4856	3.9922	HSCB;SLC1A5
Hexose Metabolic Process (GO:0019318)	2/48	4.17	0.200668	0.45006	2.4856	3.9922	GALM;FUOM
L-amino Acid Catabolic Process (GO:0170035)	1/13	7.69	0.202501	0.45006	4.7585	7.5993	SDSL
MyD88-dependent Toll-Like Receptor Signaling Pathway (GO:0002755)	1/13	7.69	0.202501	0.45006	4.7585	7.5993	IRAK2
Regulation of Long-Term Neuronal Synaptic Plasticity (GO:0048169)	1/13	7.69	0.202501	0.45006	4.7585	7.5993	SYP
Regulation of Pattern Recognition Receptor Signaling Pathway (GO:0062207)	1/13	7.69	0.202501	0.45006	4.7585	7.5993	BIRC3
Atrial Septum Development (GO:0003283)	1/13	7.69	0.202501	0.45006	4.7585	7.5993	TGFB2
Atrioventricular Valve Development (GO:0003171)	1/13	7.69	0.202501	0.45006	4.7585	7.5993	TGFB2
Regulation of Retinoic Acid Receptor Signaling Pathway (GO:0048385)	1/13	7.69	0.202501	0.45006	4.7585	7.5993	TRIM16
Cardiac Right Ventricle Morphogenesis (GO:0003215)	1/13	7.69	0.202501	0.45006	4.7585	7.5993	TGFB2
Cardiocyte Differentiation (GO:0035051)	1/13	7.69	0.202501	0.45006	4.7585	7.5993	TGFB2
Response to Progesterone (GO:0032570)	1/13	7.69	0.202501	0.45006	4.7585	7.5993	TGFB2
Secondary Palate Development (GO:0062009)	1/13	7.69	0.202501	0.45006	4.7585	7.5993	TGFB2
Embryonic Hemopoiesis (GO:0035162)	1/13	7.69	0.202501	0.45006	4.7585	7.5993	HSCB
Granulocyte Activation (GO:0036230)	1/13	7.69	0.202501	0.45006	4.7585	7.5993	CXCL8
Lipid Droplet Formation (GO:0140042)	1/13	7.69	0.202501	0.45006	4.7585	7.5993	PLA2G4C
Mature B Cell Differentiation Involved in Immune Response (GO:0002313)	1/13	7.69	0.202501	0.45006	4.7585	7.5993	IL6
Modified Amino Acid Biosynthetic Process (GO:0042398)	1/13	7.69	0.202501	0.45006	4.7585	7.5993	GCLM
Negative Regulation of DNA Replication (GO:0008156)	1/13	7.69	0.202501	0.45006	4.7585	7.5993	TSPYL2
Negative Regulation of Ras Protein Signal Transduction (GO:0046580)	1/13	7.69	0.202501	0.45006	4.7585	7.5993	TGFB2
Negative Regulation of Toll-Like Receptor 4 Signaling Pathway (GO:0034144)	1/13	7.69	0.202501	0.45006	4.7585	7.5993	SQSTM1
Nucleotide Metabolic Process (GO:0009117)	1/13	7.69	0.202501	0.45006	4.7585	7.5993	NMNAT1
Positive Regulation of T-helper 17 Type Immune Response (GO:2000318)	1/13	7.69	0.202501	0.45006	4.7585	7.5993	NFKBIZ
Positive Regulation of Cellular Respiration (GO:1901857)	1/13	7.69	0.202501	0.45006	4.7585	7.5993	NUPR1
Positive Regulation of Coagulation (GO:0050820)	1/13	7.69	0.202501	0.45006	4.7585	7.5993	SERPINE1
Positive Regulation of Protein Export From Nucleus (GO:0046827)	1/13	7.69	0.202501	0.45006	4.7585	7.5993	IL1B
Positive Regulation of Type 2 Immune Response (GO:0002830)	1/13	7.69	0.202501	0.45006	4.7585	7.5993	IL6
Programmed Necrotic Cell Death (GO:0097300)	1/13	7.69	0.202501	0.45006	4.7585	7.5993	PPIF
Protein Deacetylation (GO:0006476)	1/13	7.69	0.202501	0.45006	4.7585	7.5993	SIRT4
Chloride Transport (GO:0006821)	3/90	3.33	0.203166	0.450962	1.973	3.1444	PACC1;CLIC2;SLC12A8
Negative Regulation of Signal Transduction (GO:0009968)	7/277	2.53	0.203463	0.451045	1.4869	2.3676	SLC48A1;CXCL8;HEY1;ANGPT1;IL1B;CHAC1;SQSTM1
Activation of Protein Kinase Activity (GO:0032147)	2/49	4.08	0.206978	0.454621	2.4326	3.8317	TGFB2;ANGPT1
Epidermal Growth Factor Receptor Signaling Pathway (GO:0007173)	2/49	4.08	0.206978	0.454621	2.4326	3.8317	EREG;HBEGF
Negative Regulation of TORC1 Signaling (GO:1904262)	2/49	4.08	0.206978	0.454621	2.4326	3.8317	SESN2;TBC1D7
Negative Regulation of Small GTPase Mediated Signal Transduction (GO:0051058)	2/49	4.08	0.206978	0.454621	2.4326	3.8317	TGFB2;ARHGAP25
Calcium-Mediated Signaling (GO:0019722)	3/91	3.3	0.207618	0.454621	1.9505	3.0662	GNA15;CXCL8;CCL20
Protein O-linked Glycosylation (GO:0006493)	3/91	3.3	0.207618	0.454621	1.9505	3.0662	GCNT3;TMTC1;ST6GALNAC4
Regulation of Tumor Necrosis Factor-Mediated Signaling Pathway (GO:0010803)	2/50	4	0.213308	0.454621	2.3818	3.6799	CASP1;HSPA1B
Lipid Modification (GO:0030258)	2/50	4	0.213308	0.454621	2.3818	3.6799	DGKG;PLPP5
Positive Regulation of Cell-Cell Adhesion (GO:0022409)	2/50	4	0.213308	0.454621	2.3818	3.6799	IL1B;GCNT2
Regulation of Extracellular Matrix Disassembly (GO:0010715)	1/14	7.14	0.216267	0.454621	4.3922	6.7256	IL6
L-amino Acid Metabolic Process (GO:0170033)	1/14	7.14	0.216267	0.454621	4.3922	6.7256	PSPH
Regulation of Granulocyte Macrophage Colony-Stimulating Factor Production (GO:0032645)	1/14	7.14	0.216267	0.454621	4.3922	6.7256	IL1B
Regulation of Leukocyte Migration (GO:0002685)	1/14	7.14	0.216267	0.454621	4.3922	6.7256	HMOX1
Regulation of Macrophage Cytokine Production (GO:0010935)	1/14	7.14	0.216267	0.454621	4.3922	6.7256	TGFB2
Acidic Amino Acid Transport (GO:0015800)	1/14	7.14	0.216267	0.454621	4.3922	6.7256	SLC6A6
Acute-Phase Response (GO:0006953)	1/14	7.14	0.216267	0.454621	4.3922	6.7256	IL6
Regulation of Platelet-Derived Growth Factor Receptor Signaling Pathway (GO:0010640)	1/14	7.14	0.216267	0.454621	4.3922	6.7256	IL1B
Regulation of Trophoblast Cell Migration (GO:1901163)	1/14	7.14	0.216267	0.454621	4.3922	6.7256	TIMP1
Response to Chemokine (GO:1990868)	1/14	7.14	0.216267	0.454621	4.3922	6.7256	ZC3H12A
tRNA 5'-End Processing (GO:0099116)	1/14	7.14	0.216267	0.454621	4.3922	6.7256	RPP25L
Fucosylation (GO:0036065)	1/14	7.14	0.216267	0.454621	4.3922	6.7256	FUOM
Vascular Endothelial Growth Factor Signaling Pathway (GO:0038084)	1/14	7.14	0.216267	0.454621	4.3922	6.7256	PGF
Icosanoid Transport (GO:0071715)	1/14	7.14	0.216267	0.454621	4.3922	6.7256	ABCC2
miRNA Metabolic Process (GO:0010586)	1/14	7.14	0.216267	0.454621	4.3922	6.7256	ZC3H12A
Myotube Cell Development (GO:0014904)	1/14	7.14	0.216267	0.454621	4.3922	6.7256	TMEM182
Negative Regulation by Host of Viral Process (GO:0044793)	1/14	7.14	0.216267	0.454621	4.3922	6.7256	ZC3H12A
Negative Regulation of ATP Metabolic Process (GO:1903579)	1/14	7.14	0.216267	0.454621	4.3922	6.7256	NUPR1
Negative Regulation of ATP-dependent Activity (GO:0032780)	1/14	7.14	0.216267	0.454621	4.3922	6.7256	PPIF
Negative Regulation of Coagulation (GO:0050819)	1/14	7.14	0.216267	0.454621	4.3922	6.7256	SERPINE1
Negative Regulation of Epithelial Cell Migration (GO:0010633)	1/14	7.14	0.216267	0.454621	4.3922	6.7256	PTPRR
Negative Regulation of Fatty Acid Biosynthetic Process (GO:0045717)	1/14	7.14	0.216267	0.454621	4.3922	6.7256	TRIB3
Negative Regulation of Muscle Cell Apoptotic Process (GO:0010656)	1/14	7.14	0.216267	0.454621	4.3922	6.7256	ZC3H12A
Negative Regulation of Smooth Muscle Cell Migration (GO:0014912)	1/14	7.14	0.216267	0.454621	4.3922	6.7256	SERPINE1
Neutrophil Mediated Immunity (GO:0002446)	1/14	7.14	0.216267	0.454621	4.3922	6.7256	IL6
Phosphatidylcholine Acyl-Chain Remodeling (GO:0036151)	1/14	7.14	0.216267	0.454621	4.3922	6.7256	PLA2G4C
+ Reg of Adaptive Imm Resp Based on Som Recomb of Imm Rcptrs Built Frm IgSF Domains (GO:0002824)	1/14	7.14	0.216267	0.454621	4.3922	6.7256	IL1B
Positive Regulation of Endothelial Cell Chemotaxis (GO:2001028)	1/14	7.14	0.216267	0.454621	4.3922	6.7256	HSPB1
Positive Regulation of Long-Term Synaptic Potentiation (GO:1900273)	1/14	7.14	0.216267	0.454621	4.3922	6.7256	SQSTM1
Positive Regulation of Protein-Containing Complex Disassembly (GO:0043243)	1/14	7.14	0.216267	0.454621	4.3922	6.7256	TOM1
Protein Homotrimerization (GO:0070207)	1/14	7.14	0.216267	0.454621	4.3922	6.7256	SLC1A5
Regulation of Actin Filament Organization (GO:0110053)	1/14	7.14	0.216267	0.454621	4.3922	6.7256	CSF3
Regulation of Insulin Secretion (GO:0050796)	3/93	3.23	0.216586	0.454621	1.9069	2.9171	IL6;IL1B;SIRT4
Negative Regulation of Angiogenesis (GO:0016525)	3/93	3.23	0.216586	0.454621	1.9069	2.9171	SLC48A1;TGFB2;SERPINE1
Positive Regulation of Cellular Component Biogenesis (GO:0044089)	3/93	3.23	0.216586	0.454621	1.9069	2.9171	MMP1;MMP3;BID
Autophagosome Maturation (GO:0097352)	2/51	3.92	0.219657	0.457203	2.3331	3.5362	GABARAPL1;MAP1LC3B2
Cardiac Muscle Tissue Development (GO:0048738)	2/51	3.92	0.219657	0.457203	2.3331	3.5362	HEY1;ANKRD1
Epithelial to Mesenchymal Transition (GO:0001837)	2/51	3.92	0.219657	0.457203	2.3331	3.5362	TGFB2;HEY1
Inorganic Anion Transport (GO:0015698)	2/51	3.92	0.219657	0.457203	2.3331	3.5362	PACC1;CLIC2
Myofibril Assembly (GO:0030239)	2/51	3.92	0.219657	0.457203	2.3331	3.5362	TMOD1;ANKRD1
Organic Hydroxy Compound Transport (GO:0015850)	2/51	3.92	0.219657	0.457203	2.3331	3.5362	ABCC2;AKR1C1
Proton Transmembrane Transport (GO:1902600)	2/51	3.92	0.219657	0.457203	2.3331	3.5362	ATP6V0B;ATP6V0A4
Regulation of Immune Response (GO:0050776)	3/94	3.19	0.2211	0.459106	1.8859	2.846	TGFB2;AKR1C1;BIRC3
Positive Regulation of Phosphorylation (GO:0042327)	3/94	3.19	0.2211	0.459106	1.8859	2.846	C3;LIMCH1;EREG
Endosome Organization (GO:0007032)	2/52	3.85	0.226022	0.464401	2.2863	3.4	ATP6V0B;SQSTM1
Regulation of Cell Development (GO:0060284)	2/52	3.85	0.226022	0.464401	2.2863	3.4	HEY1;IL1B
Regulation of Execution Phase of Apoptosis (GO:1900117)	1/15	6.67	0.229796	0.464401	4.0783	5.9974	ZC3H12A
Regulation of Fatty Acid Oxidation (GO:0046320)	1/15	6.67	0.229796	0.464401	4.0783	5.9974	SIRT4
L-glutamate Transmembrane Transport (GO:0015813)	1/15	6.67	0.229796	0.464401	4.0783	5.9974	SLC7A11
Regulation of Microglial Cell Activation (GO:1903978)	1/15	6.67	0.229796	0.464401	4.0783	5.9974	IL6
Regulation of Nitric-Oxide Synthase Activity (GO:0050999)	1/15	6.67	0.229796	0.464401	4.0783	5.9974	IL1B
Autophagy of Peroxisome (GO:0030242)	1/15	6.67	0.229796	0.464401	4.0783	5.9974	SQSTM1
Regulation of Response to Endoplasmic Reticulum Stress (GO:1905897)	1/15	6.67	0.229796	0.464401	4.0783	5.9974	NUPR1
Centromere Complex Assembly (GO:0034508)	1/15	6.67	0.229796	0.464401	4.0783	5.9974	CENPV
Ceramide Transport (GO:0035627)	1/15	6.67	0.229796	0.464401	4.0783	5.9974	ABCB1
Defense Response to Protozoan (GO:0042832)	1/15	6.67	0.229796	0.464401	4.0783	5.9974	BATF2
Dicarboxylic Acid Catabolic Process (GO:0043649)	1/15	6.67	0.229796	0.464401	4.0783	5.9974	ALDH1L2
Ganglioside Biosynthetic Process (GO:0001574)	1/15	6.67	0.229796	0.464401	4.0783	5.9974	ST6GALNAC4
Membrane Repolarization During Action Potential (GO:0086011)	1/15	6.67	0.229796	0.464401	4.0783	5.9974	KCNE4
Multicellular Organismal-Level Iron Ion Homeostasis (GO:0060586)	1/15	6.67	0.229796	0.464401	4.0783	5.9974	HMOX1
Negative Regulation of Axon Extension (GO:0030517)	1/15	6.67	0.229796	0.464401	4.0783	5.9974	CDKL3
Negative Regulation of Macrophage Activation (GO:0043031)	1/15	6.67	0.229796	0.464401	4.0783	5.9974	ZC3H12A
Nitric Oxide Biosynthetic Process (GO:0006809)	1/15	6.67	0.229796	0.464401	4.0783	5.9974	NQO1
Pexophagy (GO:0000425)	1/15	6.67	0.229796	0.464401	4.0783	5.9974	SQSTM1
Positive Regulation of Membrane Protein Ectodomain Proteolysis (GO:0051044)	1/15	6.67	0.229796	0.464401	4.0783	5.9974	IL1B
Protein Trimerization (GO:0070206)	1/15	6.67	0.229796	0.464401	4.0783	5.9974	SLC1A5
Proteinogenic Amino Acid Catabolic Process (GO:0170040)	1/15	6.67	0.229796	0.464401	4.0783	5.9974	SDSL
Regulation of Focal Adhesion Assembly (GO:0051893)	2/53	3.77	0.2324	0.467489	2.2414	3.2708	SLC48A1;LIMCH1
Unsaturated Fatty Acid Metabolic Process (GO:0033559)	2/53	3.77	0.2324	0.467489	2.2414	3.2708	PLA2G4C;PTGR1
Negative Regulation of Immune System Process (GO:0002683)	2/53	3.77	0.2324	0.467489	2.2414	3.2708	HMOX1;SQSTM1
Negative Regulation of Protein Catabolic Process (GO:0042177)	2/53	3.77	0.2324	0.467489	2.2414	3.2708	NQO1;TIMP1
Regulation of Organelle Organization (GO:0033043)	3/97	3.09	0.234752	0.471533	1.8254	2.6454	CENPV;TOM1;SQSTM1
Gonad Development (GO:0008406)	2/54	3.7	0.238788	0.471533	2.1981	3.1481	TGFB2;AKR1C3
Defense Response to Gram-positive Bacterium (GO:0050830)	3/98	3.06	0.239336	0.471533	1.8061	2.5825	IL6;IL1B;ADM
Positive Regulation of Proteasomal Protein Catabolic Process (GO:1901800)	3/98	3.06	0.239336	0.471533	1.8061	2.5825	TRIB3;NUPR1;HSPA1B
Positive Regulation of Protein Modification Process (GO:0031401)	3/98	3.06	0.239336	0.471533	1.8061	2.5825	C3;EGR1;LIMCH1
Regulation of Establishment of Endothelial Barrier (GO:1903140)	1/16	6.25	0.243092	0.471533	3.8062	5.3832	IL1B
L-glutamate Import (GO:0051938)	1/16	6.25	0.243092	0.471533	3.8062	5.3832	SLC7A11
Regulation of Plasminogen Activation (GO:0010755)	1/16	6.25	0.243092	0.471533	3.8062	5.3832	SERPINE1
Regulation of Response to Cytokine Stimulus (GO:0060759)	1/16	6.25	0.243092	0.471533	3.8062	5.3832	IRAK2
Regulation of Ryanodine-Sensitive Calcium-Release Channel Activity (GO:0060314)	1/16	6.25	0.243092	0.471533	3.8062	5.3832	CLIC2
Regulation of Viral Life Cycle (GO:1903900)	1/16	6.25	0.243092	0.471533	3.8062	5.3832	IL32
Establishment of Protein Localization to Endoplasmic Reticulum (GO:0072599)	1/16	6.25	0.243092	0.471533	3.8062	5.3832	ZFAND2A
Thyroid Hormone Metabolic Process (GO:0042403)	1/16	6.25	0.243092	0.471533	3.8062	5.3832	CRYM
Triglyceride Catabolic Process (GO:0019433)	1/16	6.25	0.243092	0.471533	3.8062	5.3832	PNLIPRP3
Ubiquinone Metabolic Process (GO:0006743)	1/16	6.25	0.243092	0.471533	3.8062	5.3832	NQO1
Glycolipid Metabolic Process (GO:0006664)	1/16	6.25	0.243092	0.471533	3.8062	5.3832	ST6GALNAC4
Lipopolysaccharide-Mediated Signaling Pathway (GO:0031663)	1/16	6.25	0.243092	0.471533	3.8062	5.3832	IRAK2
Male Meiosis I (GO:0007141)	1/16	6.25	0.243092	0.471533	3.8062	5.3832	MEIOC
Membrane Lipid Metabolic Process (GO:0006643)	1/16	6.25	0.243092	0.471533	3.8062	5.3832	ST6GALNAC4
Microtubule-Based Transport (GO:0099111)	1/16	6.25	0.243092	0.471533	3.8062	5.3832	DYNC1I1
Modified Amino Acid Transport (GO:0072337)	1/16	6.25	0.243092	0.471533	3.8062	5.3832	SLC7A11
Negative Regulation of Amyloid-Beta Formation (GO:1902430)	1/16	6.25	0.243092	0.471533	3.8062	5.3832	PRNP
Negative Regulation of Cytokine Production Involved in Immune Response (GO:0002719)	1/16	6.25	0.243092	0.471533	3.8062	5.3832	TGFB2
Negative Regulation of Myoblast Differentiation (GO:0045662)	1/16	6.25	0.243092	0.471533	3.8062	5.3832	TMEM182
Negative Regulation of Release of Cytochrome C From Mitochondria (GO:0090201)	1/16	6.25	0.243092	0.471533	3.8062	5.3832	PPIF
Negative Regulation of Synaptic Transmission (GO:0050805)	1/16	6.25	0.243092	0.471533	3.8062	5.3832	IL1B
Positive Regulation of Keratinocyte Differentiation (GO:0045618)	1/16	6.25	0.243092	0.471533	3.8062	5.3832	TRIM16
Positive Regulation of Stress-Activated MAPK Cascade (GO:0032874)	1/16	6.25	0.243092	0.471533	3.8062	5.3832	TGFB2
Positive Regulation of Stress-Activated Protein Kinase Signaling Cascade (GO:0070304)	1/16	6.25	0.243092	0.471533	3.8062	5.3832	TGFB2
Protein O-linked Mannosylation (GO:0035269)	1/16	6.25	0.243092	0.471533	3.8062	5.3832	TMTC1
Regulation of Autophagosome Maturation (GO:1901096)	1/16	6.25	0.243092	0.471533	3.8062	5.3832	TOM1
Reg of Blood Vessel Endothelial Cell Proliferation Inv in Sprouting Angiogenesis (GO:1903587)	1/16	6.25	0.243092	0.471533	3.8062	5.3832	HMOX1
Negative Regulation of Multicellular Organismal Process (GO:0051241)	6/243	2.47	0.243522	0.47159	1.4501	2.0484	PTPRR;DDIT3;IL1B;ADM;TIMP1;ATF4
Positive Regulation of Autophagy (GO:0010508)	3/99	3.03	0.243935	0.47159	1.7872	2.5215	SESN2;ZC3H12A;SQSTM1
Positive Regulation of Protein Catabolic Process (GO:0045732)	3/99	3.03	0.243935	0.47159	1.7872	2.5215	IL1B;NUPR1;OAZ3
Regulation of Peptide Hormone Secretion (GO:0090276)	2/55	3.64	0.245186	0.472114	2.1566	3.0316	IL6;IL1B
Regulation of Receptor Signaling Pathway via JAK-STAT (GO:0046425)	2/55	3.64	0.245186	0.472114	2.1566	3.0316	IL6;IL7R
Cell Surface Receptor Signaling Pathway via STAT (GO:0097696)	2/55	3.64	0.245186	0.472114	2.1566	3.0316	IL6;CSF2
Epidermal Cell Differentiation (GO:0009913)	2/56	3.57	0.251589	0.472114	2.1165	2.9207	AKR1C3;EREG
Receptor Internalization (GO:0031623)	2/56	3.57	0.251589	0.472114	2.1165	2.9207	CXCL8;ADM
mRNA Metabolic Process (GO:0016071)	3/101	2.97	0.253175	0.472114	1.7505	2.4047	AKAP8L;HSPA1B;EREG
3'-UTR-mediated mRNA Destabilization (GO:0061158)	1/17	5.88	0.256159	0.472114	3.5681	4.8596	ZC3H12A
G Protein-Coupled Acetylcholine Receptor Signaling Pathway (GO:0007213)	1/17	5.88	0.256159	0.472114	3.5681	4.8596	GNA15
Regulation of Leukocyte Chemotaxis (GO:0002688)	1/17	5.88	0.256159	0.472114	3.5681	4.8596	IL6
Regulation of Mitochondrial Membrane Permeability (GO:0046902)	1/17	5.88	0.256159	0.472114	3.5681	4.8596	PPIF
Aromatic Amino Acid Family Catabolic Process (GO:0009074)	1/17	5.88	0.256159	0.472114	3.5681	4.8596	KYNU
Regulation of Protein Sumoylation (GO:0033233)	1/17	5.88	0.256159	0.472114	3.5681	4.8596	EGR1
Carboxylic Acid Biosynthetic Process (GO:0046394)	1/17	5.88	0.256159	0.472114	3.5681	4.8596	CASP1
Cell Junction Maintenance (GO:0034331)	1/17	5.88	0.256159	0.472114	3.5681	4.8596	CLDN1
Cellular Response to Copper Ion (GO:0071280)	1/17	5.88	0.256159	0.472114	3.5681	4.8596	PRNP
Regulation of Ubiquitin-Protein Transferase Activity (GO:0051438)	1/17	5.88	0.256159	0.472114	3.5681	4.8596	TRIB3
Regulation of Ventricular Cardiac Muscle Cell Membrane Repolarization (GO:0060307)	1/17	5.88	0.256159	0.472114	3.5681	4.8596	KCNE4
Cytoskeleton-Dependent Intracellular Transport (GO:0030705)	1/17	5.88	0.256159	0.472114	3.5681	4.8596	DYNC1I1
Defense Response to Symbiont (GO:0140546)	1/17	5.88	0.256159	0.472114	3.5681	4.8596	PRSS3
Ventricular Cardiac Muscle Cell Action Potential (GO:0086005)	1/17	5.88	0.256159	0.472114	3.5681	4.8596	KCNE4
Gliogenesis (GO:0042063)	1/17	5.88	0.256159	0.472114	3.5681	4.8596	TGFB2
Heparan Sulfate Proteoglycan Biosynthetic Process (GO:0015012)	1/17	5.88	0.256159	0.472114	3.5681	4.8596	B3GAT3
Innate Immune Response-Activating Signaling Pathway (GO:0002758)	1/17	5.88	0.256159	0.472114	3.5681	4.8596	CASP1
Killing by Host of Symbiont Cells (GO:0051873)	1/17	5.88	0.256159	0.472114	3.5681	4.8596	SLC48A1
Long-Chain fatty-acyl-CoA Biosynthetic Process (GO:0035338)	1/17	5.88	0.256159	0.472114	3.5681	4.8596	ACSL5
Lymphocyte Migration (GO:0072676)	1/17	5.88	0.256159	0.472114	3.5681	4.8596	CCL20
Membrane Lipid Catabolic Process (GO:0046466)	1/17	5.88	0.256159	0.472114	3.5681	4.8596	ENPP2
Modified Amino Acid Catabolic Process (GO:0042219)	1/17	5.88	0.256159	0.472114	3.5681	4.8596	CHAC1
Muscle Tissue Morphogenesis (GO:0060415)	1/17	5.88	0.256159	0.472114	3.5681	4.8596	ANKRD1
Negative Regulation of Amyloid Precursor Protein Catabolic Process (GO:1902992)	1/17	5.88	0.256159	0.472114	3.5681	4.8596	PRNP
Negative Regulation of Cation Transmembrane Transport (GO:1904063)	1/17	5.88	0.256159	0.472114	3.5681	4.8596	PPIF
Negative Regulation of Chemokine Production (GO:0032682)	1/17	5.88	0.256159	0.472114	3.5681	4.8596	IL6
Negative Regulation of Intracellular Protein Transport (GO:0090317)	1/17	5.88	0.256159	0.472114	3.5681	4.8596	NFKBIA
Negative Regulation of Vascular Associated Smooth Muscle Cell Proliferation (GO:1904706)	1/17	5.88	0.256159	0.472114	3.5681	4.8596	SOD2
Neuron Projection Organization (GO:0106027)	1/17	5.88	0.256159	0.472114	3.5681	4.8596	PRNP
Positive Regulation of Cell Adhesion Mediated by Integrin (GO:0033630)	1/17	5.88	0.256159	0.472114	3.5681	4.8596	TGFB2
Positive Regulation of Cell Migration Involved in Sprouting Angiogenesis (GO:0090050)	1/17	5.88	0.256159	0.472114	3.5681	4.8596	HMOX1
Positive Regulation of Dendrite Morphogenesis (GO:0050775)	1/17	5.88	0.256159	0.472114	3.5681	4.8596	CDKL3
Positive Regulation of Leukocyte Adhesion to Vascular Endothelial Cell (GO:1904996)	1/17	5.88	0.256159	0.472114	3.5681	4.8596	IL6
Positive Regulation of Leukocyte Proliferation (GO:0070665)	1/17	5.88	0.256159	0.472114	3.5681	4.8596	CSF2
Positive Regulation of Transcription Regulatory Region DNA Binding (GO:2000679)	1/17	5.88	0.256159	0.472114	3.5681	4.8596	IL32
Protein Autoprocessing (GO:0016540)	1/17	5.88	0.256159	0.472114	3.5681	4.8596	CASP1
Protein Mannosylation (GO:0035268)	1/17	5.88	0.256159	0.472114	3.5681	4.8596	TMTC1
Reg of Cardiac Muscle Contraction by Reg of the Release of Sequestered Calcium Ion (GO:0010881)	1/17	5.88	0.256159	0.472114	3.5681	4.8596	CLIC2
Defense Response to Virus (GO:0051607)	5/198	2.53	0.25718	0.473495	1.4829	2.0138	IL6;DDIT4;CASP1;MAP3K14;OASL
Glucose Metabolic Process (GO:0006006)	2/57	3.51	0.257997	0.473995	2.0779	2.8152	GALM;ATF4
Myeloid Cell Differentiation (GO:0030099)	2/57	3.51	0.257997	0.473995	2.0779	2.8152	CSF2;SLC1A5
Positive Regulation of Cell Motility (GO:2000147)	6/249	2.41	0.260759	0.478563	1.4139	1.9005	IL1B;GCNT2;SOD2;CLDN1;HBEGF;CCL26
Regulation of Defense Response (GO:0031347)	3/103	2.91	0.262464	0.479511	1.7154	2.2945	HERC5;CASP1;BIRC3
Regulation of Mitotic Nuclear Division (GO:0007088)	2/58	3.45	0.264407	0.479511	2.0407	2.7147	IL1B;EREG
Sprouting Angiogenesis (GO:0002040)	2/58	3.45	0.264407	0.479511	2.0407	2.7147	ANGPT1;PGF
Regulation of Cytoplasmic Pattern Recognition Receptor Signaling Pathway (GO:0039531)	1/18	5.56	0.269001	0.479511	3.3581	4.4093	BIRC3
Regulation of Defense Response to Virus (GO:0050688)	1/18	5.56	0.269001	0.479511	3.3581	4.4093	HERC5
Regulation of Integrin-Mediated Signaling Pathway (GO:2001044)	1/18	5.56	0.269001	0.479511	3.3581	4.4093	TIMP1
Regulation of Lymphocyte Proliferation (GO:0050670)	1/18	5.56	0.269001	0.479511	3.3581	4.4093	TNFSF8
Regulation of Microtubule Nucleation (GO:0010968)	1/18	5.56	0.269001	0.479511	3.3581	4.4093	HSPA1B
Aorta Morphogenesis (GO:0035909)	1/18	5.56	0.269001	0.479511	3.3581	4.4093	HEY1
Cardiac Atrium Morphogenesis (GO:0003209)	1/18	5.56	0.269001	0.479511	3.3581	4.4093	TGFB2
Regulation of Steroid Biosynthetic Process (GO:0050810)	1/18	5.56	0.269001	0.479511	3.3581	4.4093	EGR1
Embryo Development Ending in Birth or Egg Hatching (GO:0009792)	1/18	5.56	0.269001	0.479511	3.3581	4.4093	TGFB2
Endoplasmic Reticulum Tubular Network Organization (GO:0071786)	1/18	5.56	0.269001	0.479511	3.3581	4.4093	ZFYVE27
Transepithelial Transport (GO:0070633)	1/18	5.56	0.269001	0.479511	3.3581	4.4093	ABCC2
Negative Regulation of Insulin Secretion (GO:0046676)	1/18	5.56	0.269001	0.479511	3.3581	4.4093	SIRT4
Negative Regulation of Nucleocytoplasmic Transport (GO:0046823)	1/18	5.56	0.269001	0.479511	3.3581	4.4093	NFKBIA
Negative Regulation of Reproductive Process (GO:2000242)	1/18	5.56	0.269001	0.479511	3.3581	4.4093	TIMP1
Neuron Maturation (GO:0042551)	1/18	5.56	0.269001	0.479511	3.3581	4.4093	C3
Nucleobase-Containing Small Molecule Metabolic Process (GO:0055086)	1/18	5.56	0.269001	0.479511	3.3581	4.4093	GLRX
Nucleotide Biosynthetic Process (GO:0009165)	1/18	5.56	0.269001	0.479511	3.3581	4.4093	NMNAT1
Pharyngeal System Development (GO:0060037)	1/18	5.56	0.269001	0.479511	3.3581	4.4093	TGFB2
Positive Regulation of Cytokine Production Involved in Inflammatory Response (GO:1900017)	1/18	5.56	0.269001	0.479511	3.3581	4.4093	IL6
Positive Regulation of Focal Adhesion Assembly (GO:0051894)	1/18	5.56	0.269001	0.479511	3.3581	4.4093	SLC48A1
Positive Regulation of Homotypic Cell-Cell Adhesion (GO:0034112)	1/18	5.56	0.269001	0.479511	3.3581	4.4093	IL6
Positive Regulation of Lymphocyte Migration (GO:2000403)	1/18	5.56	0.269001	0.479511	3.3581	4.4093	CCL20
Positive Regulation of Ubiquitin-Protein Transferase Activity (GO:0051443)	1/18	5.56	0.269001	0.479511	3.3581	4.4093	TRIB3
Regulation of Acute Inflammatory Response (GO:0002673)	1/18	5.56	0.269001	0.479511	3.3581	4.4093	IL6
Regulation of Amyloid Precursor Protein Catabolic Process (GO:1902991)	1/18	5.56	0.269001	0.479511	3.3581	4.4093	PRNP
Negative Regulation of Macromolecule Biosynthetic Process (GO:0010558)	5/202	2.48	0.270261	0.481264	1.4525	1.9004	TGFB2;CXCL8;ZC3H12A;ANKRD1;CD34
Cellular Response to Calcium Ion (GO:0071277)	2/59	3.39	0.270818	0.481762	2.0048	2.6189	PPIF;AKR1C3
Positive Regulation of Multicellular Organismal Process (GO:0051240)	9/407	2.21	0.271135	0.481834	1.296	1.6915	TGFB2;IL6;ANGPT1;BAMBI;IL1B;SERPINE1;GCNT2;TRIM16;EREG
Positive Regulation of ERK1 and ERK2 Cascade (GO:0070374)	4/153	2.61	0.271544	0.482021	1.5356	2.0019	ANGPT1;IL1B;GCNT2;ICAM1
Positive Regulation of NF-kappaB Transcription Factor Activity (GO:0051092)	3/105	2.86	0.271796	0.482021	1.6815	2.1906	IL1B;TRAF1;HSPA1B
Positive Regulation of Canonical NF-kappaB Signal Transduction (GO:0043123)	5/204	2.45	0.276855	0.483655	1.4378	1.8465	IRAK2;IL1B;CASP1;HMOX1;BIRC3
Response to Reactive Oxygen Species (GO:0000302)	2/60	3.33	0.277227	0.483655	1.9701	2.5275	MMP3;HMOX1
Response to Type II Interferon (GO:0034341)	2/60	3.33	0.277227	0.483655	1.9701	2.5275	KYNU;CASP1
Negative Regulation of Protein Kinase Activity (GO:0006469)	2/60	3.33	0.277227	0.483655	1.9701	2.5275	HSPB1;TRIB3
Neuron Migration (GO:0001764)	2/60	3.33	0.277227	0.483655	1.9701	2.5275	DDIT4;NRCAM
Positive Regulation of Signal Transduction (GO:0009967)	6/256	2.34	0.281258	0.483655	1.3738	1.7426	C3;PRNP;TGFB2;IL6;IL1B;IL7R
Regulation of Smooth Muscle Cell Migration (GO:0014910)	1/19	5.26	0.281622	0.483655	3.1714	4.0187	SERPINE1
Response to Acidic pH (GO:0010447)	1/19	5.26	0.281622	0.483655	3.1714	4.0187	CTSS
Response to Fibroblast Growth Factor (GO:0071774)	1/19	5.26	0.281622	0.483655	3.1714	4.0187	CXCL8
Signaling Receptor Ligand Precursor Processing (GO:0140448)	1/19	5.26	0.281622	0.483655	3.1714	4.0187	CASP1
Dopamine Metabolic Process (GO:0042417)	1/19	5.26	0.281622	0.483655	3.1714	4.0187	TGFB2
Embryonic Digestive Tract Development (GO:0048566)	1/19	5.26	0.281622	0.483655	3.1714	4.0187	TGFB2
Superoxide Anion Generation (GO:0042554)	1/19	5.26	0.281622	0.483655	3.1714	4.0187	NCF2
Eosinophil Chemotaxis (GO:0048245)	1/19	5.26	0.281622	0.483655	3.1714	4.0187	CCL26
Eosinophil Migration (GO:0072677)	1/19	5.26	0.281622	0.483655	3.1714	4.0187	CCL26
Glycoprotein Catabolic Process (GO:0006516)	1/19	5.26	0.281622	0.483655	3.1714	4.0187	FBXO6
Limb Morphogenesis (GO:0035108)	1/19	5.26	0.281622	0.483655	3.1714	4.0187	TGFB2
Membrane Repolarization (GO:0086009)	1/19	5.26	0.281622	0.483655	3.1714	4.0187	KCNE4
Negative Regulation of Calcium Ion Transmembrane Transporter Activity (GO:1901020)	1/19	5.26	0.281622	0.483655	3.1714	4.0187	CLIC2
Negative Regulation of Lipid Catabolic Process (GO:0050995)	1/19	5.26	0.281622	0.483655	3.1714	4.0187	IL1B
Negative Regulation of Peptide Hormone Secretion (GO:0090278)	1/19	5.26	0.281622	0.483655	3.1714	4.0187	SIRT4
Negative Regulation of Reactive Oxygen Species Metabolic Process (GO:2000378)	1/19	5.26	0.281622	0.483655	3.1714	4.0187	MMP3
Neutrophil Activation (GO:0042119)	1/19	5.26	0.281622	0.483655	3.1714	4.0187	CXCL8
Nucleoside Phosphate Biosynthetic Process (GO:1901293)	1/19	5.26	0.281622	0.483655	3.1714	4.0187	NMNAT1
Positive Regulation of Axon Extension (GO:0045773)	1/19	5.26	0.281622	0.483655	3.1714	4.0187	ZFYVE27
Positive Regulation of Cation Transmembrane Transport (GO:1904064)	1/19	5.26	0.281622	0.483655	3.1714	4.0187	CTSS
Positive Regulation of Glycolytic Process (GO:0045821)	1/19	5.26	0.281622	0.483655	3.1714	4.0187	UCHL1
Positive Regulation of Neutrophil Chemotaxis (GO:0090023)	1/19	5.26	0.281622	0.483655	3.1714	4.0187	CXCL8
Positive Regulation of Purine Nucleotide Catabolic Process (GO:0033123)	1/19	5.26	0.281622	0.483655	3.1714	4.0187	UCHL1
Positive Regulation of Small Molecule Metabolic Process (GO:0062013)	1/19	5.26	0.281622	0.483655	3.1714	4.0187	ADM
Positive Regulation of Stem Cell Differentiation (GO:2000738)	1/19	5.26	0.281622	0.483655	3.1714	4.0187	TGFB2
Regulation of Centriole Replication (GO:0046599)	1/19	5.26	0.281622	0.483655	3.1714	4.0187	C10ORF90
Vesicle Organization (GO:0016050)	2/61	3.28	0.283632	0.486626	1.9367	2.4403	CD34;SQSTM1
ATP Metabolic Process (GO:0046034)	2/62	3.23	0.290032	0.493736	1.9043	2.357	NMNAT1;HSPA1B
Organic Cation Transport (GO:0015695)	2/62	3.23	0.290032	0.493736	1.9043	2.357	SLC6A6;SLC3A2
Regulation of Collagen Biosynthetic Process (GO:0032965)	1/20	5	0.294026	0.493736	3.0043	3.6775	IL6
T Cell Migration (GO:0072678)	1/20	5	0.294026	0.493736	3.0043	3.6775	CCL26
Ameboidal-Type Cell Migration (GO:0001667)	1/20	5	0.294026	0.493736	3.0043	3.6775	CENPV
Regulation of Necroptotic Process (GO:0060544)	1/20	5	0.294026	0.493736	3.0043	3.6775	BIRC3
Bicarbonate Transport (GO:0015701)	1/20	5	0.294026	0.493736	3.0043	3.6775	CYB5R1
Cardiac Ventricle Development (GO:0003231)	1/20	5	0.294026	0.493736	3.0043	3.6775	HEY1
Striated Muscle Cell Differentiation (GO:0051146)	1/20	5	0.294026	0.493736	3.0043	3.6775	POPDC3
Transport Along Microtubule (GO:0010970)	1/20	5	0.294026	0.493736	3.0043	3.6775	DYNC1I1
Ganglioside Metabolic Process (GO:0001573)	1/20	5	0.294026	0.493736	3.0043	3.6775	ST6GALNAC4
Glutamate Metabolic Process (GO:0006536)	1/20	5	0.294026	0.493736	3.0043	3.6775	GCLM
High-Density Lipoprotein Particle Remodeling (GO:0034375)	1/20	5	0.294026	0.493736	3.0043	3.6775	PNLIPRP3
Hydrogen Peroxide Catabolic Process (GO:0042744)	1/20	5	0.294026	0.493736	3.0043	3.6775	PRDX1
Leukotriene Metabolic Process (GO:0006691)	1/20	5	0.294026	0.493736	3.0043	3.6775	PTGR1
Lysosomal Lumen Acidification (GO:0007042)	1/20	5	0.294026	0.493736	3.0043	3.6775	ATP6V0B
Positive Regulation of RNA Metabolic Process (GO:0051254)	1/20	5	0.294026	0.493736	3.0043	3.6775	IL1B
Positive Regulation of Ion Transmembrane Transporter Activity (GO:0032414)	1/20	5	0.294026	0.493736	3.0043	3.6775	CTSS
Positive Regulation of Monocyte Chemotaxis (GO:0090026)	1/20	5	0.294026	0.493736	3.0043	3.6775	SERPINE1
Positive Regulation of Monooxygenase Activity (GO:0032770)	1/20	5	0.294026	0.493736	3.0043	3.6775	IL1B
Positive Regulation of Osteoclast Differentiation (GO:0045672)	1/20	5	0.294026	0.493736	3.0043	3.6775	TM4SF19
Positive Regulation of Protein Targeting to Membrane (GO:0090314)	1/20	5	0.294026	0.493736	3.0043	3.6775	PRNP
Retinoid Metabolic Process (GO:0001523)	2/64	3.12	0.30281	0.502573	1.8427	2.2013	AKR1C1;AKR1C3
Cellular Response to Metal Ion (GO:0071248)	3/112	2.68	0.304691	0.502573	1.573	1.8694	PRNP;PPIF;AKR1C3
Regulation of Epithelial Cell Differentiation (GO:0030856)	1/21	4.76	0.306216	0.502573	2.8539	3.3775	APOLD1
NADP Metabolic Process (GO:0006739)	1/21	4.76	0.306216	0.502573	2.8539	3.3775	ALDH1L2
Regulation of Systemic Arterial Blood Pressure (GO:0003073)	1/21	4.76	0.306216	0.502573	2.8539	3.3775	ADM
Response to Copper Ion (GO:0046688)	1/21	4.76	0.306216	0.502573	2.8539	3.3775	PRNP
Vasodilation (GO:0042311)	1/21	4.76	0.306216	0.502573	2.8539	3.3775	SOD2
Intrinsic Apoptotic Signaling Pathway in Response to DNA Damage by P53 Class Mediator (GO:0042771)	1/21	4.76	0.306216	0.502573	2.8539	3.3775	DDIT4
Long-Term Memory (GO:0007616)	1/21	4.76	0.306216	0.502573	2.8539	3.3775	PRNP
Lymphocyte Chemotaxis (GO:0048247)	1/21	4.76	0.306216	0.502573	2.8539	3.3775	CCL26
Myoblast Differentiation (GO:0045445)	1/21	4.76	0.306216	0.502573	2.8539	3.3775	XIRP1
Negative Regulation of Amide Metabolic Process (GO:0034249)	1/21	4.76	0.306216	0.502573	2.8539	3.3775	PRNP
Negative Regulation of Biomineral Tissue Development (GO:0070168)	1/21	4.76	0.306216	0.502573	2.8539	3.3775	HEY1
Negative Regulation of Cation Channel Activity (GO:2001258)	1/21	4.76	0.306216	0.502573	2.8539	3.3775	CLIC2
Negative Regulation of Cilium Assembly (GO:1902018)	1/21	4.76	0.306216	0.502573	2.8539	3.3775	TBC1D7
Negative Regulation of Leukocyte Activation (GO:0002695)	1/21	4.76	0.306216	0.502573	2.8539	3.3775	ZC3H12A
Peripheral Nervous System Development (GO:0007422)	1/21	4.76	0.306216	0.502573	2.8539	3.3775	GSTM3
Positive Regulation of Epidermal Cell Differentiation (GO:0045606)	1/21	4.76	0.306216	0.502573	2.8539	3.3775	TRIM16
Positive Regulation of Extracellular Matrix Organization (GO:1903055)	1/21	4.76	0.306216	0.502573	2.8539	3.3775	IL6
Positive Regulation of Granulocyte Chemotaxis (GO:0071624)	1/21	4.76	0.306216	0.502573	2.8539	3.3775	CXCL8
Positive Regulation of Lipid Catabolic Process (GO:0050996)	1/21	4.76	0.306216	0.502573	2.8539	3.3775	IL1B
Regulation of Cardiac Muscle Cell Membrane Repolarization (GO:0099623)	1/21	4.76	0.306216	0.502573	2.8539	3.3775	KCNE4
Regulation of Cell-Substrate Junction Assembly (GO:0090109)	1/21	4.76	0.306216	0.502573	2.8539	3.3775	LIMCH1
Macroautophagy (GO:0016236)	4/162	2.47	0.306228	0.502573	1.4475	1.713	GABARAPL1;TOM1;MAP1LC3B2;SQSTM1
Regulation of Extrinsic Apoptotic Signaling Pathway (GO:2001236)	2/65	3.08	0.309184	0.504092	1.8133	2.1285	TRAF1;BID
Anterior/Posterior Pattern Specification (GO:0009952)	2/65	3.08	0.309184	0.504092	1.8133	2.1285	HEY1;DDIT3
Cellular Response to Virus (GO:0098586)	2/65	3.08	0.309184	0.504092	1.8133	2.1285	IL6;ZC3H12A
Glycerophospholipid Metabolic Process (GO:0006650)	2/65	3.08	0.309184	0.504092	1.8133	2.1285	PLA2G4C;GDPD1
Negative Regulation of NF-kappaB Transcription Factor Activity (GO:0032088)	2/65	3.08	0.309184	0.504092	1.8133	2.1285	NFKBIA;ZC3H12A
Pattern Recognition Receptor Signaling Pathway (GO:0002221)	2/65	3.08	0.309184	0.504092	1.8133	2.1285	CASP1;CTSS
Positive Regulation of T Cell Proliferation (GO:0042102)	2/65	3.08	0.309184	0.504092	1.8133	2.1285	IL6;IL1B
Transforming Growth Factor Beta Receptor Superfamily Signaling Pathway (GO:0141091)	3/114	2.63	0.31413	0.509701	1.5445	1.7884	TGFB2;BAMBI;GCNT2
Cell-Cell Junction Organization (GO:0045216)	2/66	3.03	0.315546	0.509701	1.7849	2.0588	TGFB2;CLDN1
Regulation of Viral Genome Replication (GO:0045069)	2/66	3.03	0.315546	0.509701	1.7849	2.0588	CXCL8;OASL
Negative Regulation of Viral Process (GO:0048525)	2/66	3.03	0.315546	0.509701	1.7849	2.0588	IL32;OASL
Protein-Containing Complex Disassembly (GO:0032984)	2/66	3.03	0.315546	0.509701	1.7849	2.0588	GABARAPL1;MAP1LC3B2
Regulation of Interleukin-4 Production (GO:0032673)	1/22	4.55	0.318196	0.509701	2.7179	3.1122	DDIT3
Regulation of Mitotic Spindle Assembly (GO:1901673)	1/22	4.55	0.318196	0.509701	2.7179	3.1122	HSPA1B
Alpha-Amino Acid Catabolic Process (GO:1901606)	1/22	4.55	0.318196	0.509701	2.7179	3.1122	CRYM
Anterior/Posterior Axis Specification (GO:0009948)	1/22	4.55	0.318196	0.509701	2.7179	3.1122	DDIT3
Diacylglycerol Metabolic Process (GO:0046339)	1/22	4.55	0.318196	0.509701	2.7179	3.1122	DGKG
tRNA Aminoacylation (GO:0043039)	1/22	4.55	0.318196	0.509701	2.7179	3.1122	GARS1
Heparan Sulfate Proteoglycan Metabolic Process (GO:0030201)	1/22	4.55	0.318196	0.509701	2.7179	3.1122	B3GAT3
Negative Regulation of T Cell Receptor Signaling Pathway (GO:0050860)	1/22	4.55	0.318196	0.509701	2.7179	3.1122	PRNP
Negative Regulation of Cell Communication (GO:0010648)	1/22	4.55	0.318196	0.509701	2.7179	3.1122	IL1B
Neuron Apoptotic Process (GO:0051402)	1/22	4.55	0.318196	0.509701	2.7179	3.1122	BID
Nitric Oxide Metabolic Process (GO:0046209)	1/22	4.55	0.318196	0.509701	2.7179	3.1122	NQO1
Positive Regulation of Heart Contraction (GO:0045823)	1/22	4.55	0.318196	0.509701	2.7179	3.1122	TGFB2
Regulation of Calcium Ion Import (GO:0090279)	1/22	4.55	0.318196	0.509701	2.7179	3.1122	PRNP
Regulation of Cardiac Muscle Contraction by Calcium Ion Signaling (GO:0010882)	1/22	4.55	0.318196	0.509701	2.7179	3.1122	CLIC2
Protein Processing (GO:0016485)	3/115	2.61	0.318852	0.509811	1.5306	1.7495	CASP1;PRSS3;CTSS
Regulation of JNK Cascade (GO:0046328)	3/115	2.61	0.318852	0.509811	1.5306	1.7495	GADD45B;IL1B;MAP3K10
Neurogenesis (GO:0022008)	2/67	2.99	0.321895	0.514204	1.7573	1.992	TGFB2;CHAC1
Protein Complex Oligomerization (GO:0051259)	3/116	2.59	0.323575	0.516413	1.517	1.7117	AKR1C1;ZC3H12A;CLDN1
Protein-Containing Complex Assembly (GO:0065003)	7/323	2.17	0.324091	0.516762	1.2674	1.4281	ANGPT1;ZC3H12A;ADRM1;CASP1;VAMP1;TRAF1;CLDN1
T-helper Cell Differentiation (GO:0042093)	1/23	4.35	0.32997	0.518994	2.5942	2.8763	IL6
Cellular Response to Interleukin-6 (GO:0071354)	1/23	4.35	0.32997	0.518994	2.5942	2.8763	IL6
Xenobiotic Catabolic Process (GO:0042178)	1/23	4.35	0.32997	0.518994	2.5942	2.8763	GSTM3
Iron-Sulfur Cluster Assembly (GO:0016226)	1/23	4.35	0.32997	0.518994	2.5942	2.8763	HSCB
Long-Chain fatty-acyl-CoA Metabolic Process (GO:0035336)	1/23	4.35	0.32997	0.518994	2.5942	2.8763	ACSL5
Metallo-Sulfur Cluster Assembly (GO:0031163)	1/23	4.35	0.32997	0.518994	2.5942	2.8763	HSCB
Modulation by Host of Viral Genome Replication (GO:0044827)	1/23	4.35	0.32997	0.518994	2.5942	2.8763	ZC3H12A
Negative Regulation of Cell Junction Assembly (GO:1901889)	1/23	4.35	0.32997	0.518994	2.5942	2.8763	IL1B
Negative Regulation of Interleukin-2 Production (GO:0032703)	1/23	4.35	0.32997	0.518994	2.5942	2.8763	PRNP
Negative Regulation of Neuron Differentiation (GO:0045665)	1/23	4.35	0.32997	0.518994	2.5942	2.8763	HEY1
Negative Regulation of Osteoclast Differentiation (GO:0045671)	1/23	4.35	0.32997	0.518994	2.5942	2.8763	TNFAIP6
Positive Regulation of DNA Replication (GO:0045740)	1/23	4.35	0.32997	0.518994	2.5942	2.8763	EREG
Positive Regulation of Cell-Substrate Junction Organization (GO:0150117)	1/23	4.35	0.32997	0.518994	2.5942	2.8763	SLC48A1
Positive Regulation of Phosphate Metabolic Process (GO:0045937)	1/23	4.35	0.32997	0.518994	2.5942	2.8763	EREG
Protein Targeting to ER (GO:0045047)	1/23	4.35	0.32997	0.518994	2.5942	2.8763	ZFAND2A
Cellular Response to Nitrogen Compound (GO:1901699)	4/169	2.37	0.333517	0.523824	1.3856	1.5215	EGR1;PRNP;SESN2;ICAM1
Defense Response to Bacterium (GO:0042742)	5/221	2.26	0.333987	0.523824	1.3235	1.4514	IL6;IL1B;SERPINE1;CASP1;ADM
Autophagosome Organization (GO:1905037)	2/69	2.9	0.334548	0.523824	1.7047	1.8666	GABARAPL1;MAP1LC3B2
Cell Junction Organization (GO:0034330)	2/69	2.9	0.334548	0.523824	1.7047	1.8666	TGFB2;CLDN1
Skin Development (GO:0043588)	2/69	2.9	0.334548	0.523824	1.7047	1.8666	AKR1C3;EREG
Positive Regulation of Cell Cycle Process (GO:0090068)	3/119	2.52	0.337744	0.525309	1.4775	1.6038	CENPV;IL1B;EREG
Regulation of ERK1 and ERK2 Cascade (GO:0070372)	5/223	2.24	0.340796	0.525309	1.3112	1.4115	PTPRR;ANGPT1;IL1B;GCNT2;ICAM1
Amide Biosynthetic Process (GO:0043604)	2/70	2.86	0.340849	0.525309	1.6796	1.8077	CHAC1;GCLM
Spermatid Development (GO:0007286)	2/70	2.86	0.340849	0.525309	1.6796	1.8077	MEIOC;IQCG
Positive Regulation of Endothelial Cell Proliferation (GO:0001938)	2/70	2.86	0.340849	0.525309	1.6796	1.8077	HMOX1;CCL26
Regulation of Release of Sequestered Calcium Ion Into Cytosol by Sarcoplasmic Reticulum (GO:0010880)	1/24	4.17	0.341542	0.525309	2.4813	2.6656	CLIC2
Cellular Response to Acetylcholine (GO:1905145)	1/24	4.17	0.341542	0.525309	2.4813	2.6656	CHRNE
Response to dsRNA (GO:0043331)	1/24	4.17	0.341542	0.525309	2.4813	2.6656	SLC3A2
Response to Ketone (GO:1901654)	1/24	4.17	0.341542	0.525309	2.4813	2.6656	TGFB2
Secondary Alcohol Biosynthetic Process (GO:1902653)	1/24	4.17	0.341542	0.525309	2.4813	2.6656	TM7SF2
Vesicle Transport Along Microtubule (GO:0047496)	1/24	4.17	0.341542	0.525309	2.4813	2.6656	DYNC1I1
Macrophage Differentiation (GO:0030225)	1/24	4.17	0.341542	0.525309	2.4813	2.6656	CSF2
Mitochondrial Cytochrome C Oxidase Assembly (GO:0033617)	1/24	4.17	0.341542	0.525309	2.4813	2.6656	COX19
Myotube Differentiation (GO:0014902)	1/24	4.17	0.341542	0.525309	2.4813	2.6656	TMEM182
Negative Regulation of Response to Wounding (GO:1903035)	1/24	4.17	0.341542	0.525309	2.4813	2.6656	SERPINE1
Outflow Tract Septum Morphogenesis (GO:0003148)	1/24	4.17	0.341542	0.525309	2.4813	2.6656	TGFB2
Positive Regulation of JUN Kinase Activity (GO:0043507)	1/24	4.17	0.341542	0.525309	2.4813	2.6656	MAP3K10
Positive Regulation of Receptor Internalization (GO:0002092)	1/24	4.17	0.341542	0.525309	2.4813	2.6656	ANGPT1
Potassium Ion Homeostasis (GO:0055075)	1/24	4.17	0.341542	0.525309	2.4813	2.6656	SLC12A8
Regulation of Cholesterol Transport (GO:0032374)	1/24	4.17	0.341542	0.525309	2.4813	2.6656	NFKBIA
Negative Regulation of Catabolic Process (GO:0009895)	3/120	2.5	0.342463	0.526261	1.4648	1.5697	NQO1;IL1B;NUPR1
Positive Regulation of Proteasomal Ubiquitin-Dependent Protein Catabolic Process (GO:0032436)	2/71	2.82	0.347131	0.531051	1.6551	1.7512	TRIB3;HSPA1B
Positive Regulation of Protein Polymerization (GO:0032273)	2/71	2.82	0.347131	0.531051	1.6551	1.7512	CSF3;CCL26
Regulation of Actin Filament Polymerization (GO:0030833)	2/71	2.82	0.347131	0.531051	1.6551	1.7512	CSF3;CCL26
- Reg of Transmembrane Receptor Prot Serine/Threonine Kinase Sgnlng Pway (GO:0090101)	3/122	2.46	0.351895	0.531051	1.4401	1.504	TNFAIP6;BAMBI;HTRA3
Amino Acid Metabolic Process (GO:0006520)	1/25	4	0.352914	0.531051	2.3778	2.4765	PRNP
Antigen Processing and Presentation of Exogenous Peptide Antigen via MHC Class II (GO:0019886)	1/25	4	0.352914	0.531051	2.3778	2.4765	CTSS
Regulation of Protein Export From Nucleus (GO:0046825)	1/25	4	0.352914	0.531051	2.3778	2.4765	IL1B
Regulation of Protein Targeting to Membrane (GO:0090313)	1/25	4	0.352914	0.531051	2.3778	2.4765	PRNP
Cardiac Conduction System Development (GO:0003161)	1/25	4	0.352914	0.531051	2.3778	2.4765	HEY1
Regulation of Toll-Like Receptor Signaling Pathway (GO:0034121)	1/25	4	0.352914	0.531051	2.3778	2.4765	BIRC3
Response to Glucocorticoid (GO:0051384)	1/25	4	0.352914	0.531051	2.3778	2.4765	IL6
Cholesterol Biosynthetic Process (GO:0006695)	1/25	4	0.352914	0.531051	2.3778	2.4765	TM7SF2
Epithelial Cell Development (GO:0002064)	1/25	4	0.352914	0.531051	2.3778	2.4765	TMEM79
Vesicle Cytoskeletal Trafficking (GO:0099518)	1/25	4	0.352914	0.531051	2.3778	2.4765	DYNC1I1
Lipid Translocation (GO:0034204)	1/25	4	0.352914	0.531051	2.3778	2.4765	ABCB1
Meiosis I (GO:0007127)	1/25	4	0.352914	0.531051	2.3778	2.4765	MEIOC
Negative Regulation of Axonogenesis (GO:0050771)	1/25	4	0.352914	0.531051	2.3778	2.4765	CDKL3
Negative Regulation of Catalytic Activity (GO:0043086)	1/25	4	0.352914	0.531051	2.3778	2.4765	TIMP1
Negative Regulation of Interleukin-1 Beta Production (GO:0032691)	1/25	4	0.352914	0.531051	2.3778	2.4765	ZC3H12A
Negative Regulation of Non-Canonical NF-kappaB Signal Transduction (GO:1901223)	1/25	4	0.352914	0.531051	2.3778	2.4765	ZC3H12A
Positive Regulation of Interleukin-17 Production (GO:0032740)	1/25	4	0.352914	0.531051	2.3778	2.4765	IL6
Positive Regulation of Neutrophil Migration (GO:1902624)	1/25	4	0.352914	0.531051	2.3778	2.4765	CXCL8
Regulation of B Cell Activation (GO:0050864)	1/25	4	0.352914	0.531051	2.3778	2.4765	IL6
Regulation of Biomineral Tissue Development (GO:0070167)	1/25	4	0.352914	0.531051	2.3778	2.4765	HEY1
Monocarboxylic Acid Transport (GO:0015718)	2/72	2.78	0.353394	0.531313	1.6314	1.6969	ABCC2;AKR1C1
Establishment of Protein Localization to Membrane (GO:0090150)	2/73	2.74	0.359635	0.538543	1.6083	1.6448	GOLGA7B;BID
Regulation of DNA Replication (GO:0006275)	2/73	2.74	0.359635	0.538543	1.6083	1.6448	TSPYL2;EREG
Reg of Endoplasmic Reticulum Stress-Induced Intrinsic Apoptotic Sgnlng Pway (GO:1902235)	1/26	3.85	0.36409	0.538543	2.2826	2.3062	DDIT3
Regulation of Fatty Acid Biosynthetic Process (GO:0042304)	1/26	3.85	0.36409	0.538543	2.2826	2.3062	TRIB3
Regulation of Lipid Catabolic Process (GO:0050994)	1/26	3.85	0.36409	0.538543	2.2826	2.3062	IL1B
Acylglycerol Homeostasis (GO:0055090)	1/26	3.85	0.36409	0.538543	2.2826	2.3062	ANGPTL4
Regulation of Platelet Aggregation (GO:0090330)	1/26	3.85	0.36409	0.538543	2.2826	2.3062	IL6
Regulation of Vascular Endothelial Growth Factor Receptor Signaling Pathway (GO:0030947)	1/26	3.85	0.36409	0.538543	2.2826	2.3062	IL1B
Cellular Response to Topologically Incorrect Protein (GO:0035967)	1/26	3.85	0.36409	0.538543	2.2826	2.3062	HSPB8
Cellular Response to Xenobiotic Stimulus (GO:0071466)	1/26	3.85	0.36409	0.538543	2.2826	2.3062	IL1B
Dendritic Spine Organization (GO:0097061)	1/26	3.85	0.36409	0.538543	2.2826	2.3062	PRNP
Fat-Soluble Vitamin Metabolic Process (GO:0006775)	1/26	3.85	0.36409	0.538543	2.2826	2.3062	NQO1
fatty-acyl-CoA Biosynthetic Process (GO:0046949)	1/26	3.85	0.36409	0.538543	2.2826	2.3062	ACSL5
Negative Regulation of DNA Biosynthetic Process (GO:2000279)	1/26	3.85	0.36409	0.538543	2.2826	2.3062	ANKRD1
Negative Regulation of Macroautophagy (GO:0016242)	1/26	3.85	0.36409	0.538543	2.2826	2.3062	NUPR1
Negative Regulation of Protein Localization to Nucleus (GO:1900181)	1/26	3.85	0.36409	0.538543	2.2826	2.3062	NFKBIA
Positive Regulation of T Cell Migration (GO:2000406)	1/26	3.85	0.36409	0.538543	2.2826	2.3062	CCL20
Positive Regulation of Interleukin-2 Production (GO:0032743)	1/26	3.85	0.36409	0.538543	2.2826	2.3062	IL1B
Regulation of T Cell Migration (GO:2000404)	1/26	3.85	0.36409	0.538543	2.2826	2.3062	CCL20
Positive Regulation of Cytoskeleton Organization (GO:0051495)	2/74	2.7	0.365854	0.540692	1.5859	1.5947	CSF3;CCL26
Positive Regulation of Protein Localization to Nucleus (GO:1900182)	2/75	2.67	0.372049	0.546419	1.5641	1.5465	SESN2;ZC3H12A
Regulation of Kinase Activity (GO:0043549)	1/27	3.7	0.375074	0.546419	2.1947	2.1522	TSPYL2
Regulation of Lysosomal Lumen pH (GO:0035751)	1/27	3.7	0.375074	0.546419	2.1947	2.1522	ATP6V0B
Regulation of Myeloid Cell Differentiation (GO:0045637)	1/27	3.7	0.375074	0.546419	2.1947	2.1522	CSF3
Antigen Processing and Presentation of Peptide Antigen via MHC Class II (GO:0002495)	1/27	3.7	0.375074	0.546419	2.1947	2.1522	CTSS
Regulation of Transcription by RNA Polymerase III (GO:0006359)	1/27	3.7	0.375074	0.546419	2.1947	2.1522	BRF2
Respiratory Chain Complex IV Assembly (GO:0008535)	1/27	3.7	0.375074	0.546419	2.1947	2.1522	COX19
Dicarboxylic Acid Transport (GO:0006835)	1/27	3.7	0.375074	0.546419	2.1947	2.1522	SLC13A3
Striated Muscle Cell Development (GO:0055002)	1/27	3.7	0.375074	0.546419	2.1947	2.1522	TMOD1
Zymogen Activation (GO:0031638)	1/27	3.7	0.375074	0.546419	2.1947	2.1522	PRSS3
in Utero Embryonic Development (GO:0001701)	1/27	3.7	0.375074	0.546419	2.1947	2.1522	PTPRR
Nuclear-Transcribed mRNA Catabolic Process, Nonsense-Mediated Decay (GO:0000184)	1/27	3.7	0.375074	0.546419	2.1947	2.1522	ZC3H12A
Peptide Hormone Secretion (GO:0030072)	1/27	3.7	0.375074	0.546419	2.1947	2.1522	IL6
Phagocytosis, Engulfment (GO:0006911)	1/27	3.7	0.375074	0.546419	2.1947	2.1522	ARHGAP25
Plasma Membrane Invagination (GO:0099024)	1/27	3.7	0.375074	0.546419	2.1947	2.1522	ARHGAP25
Positive Regulation of Erythrocyte Differentiation (GO:0045648)	1/27	3.7	0.375074	0.546419	2.1947	2.1522	HSPA1B
Regulation of Cation Channel Activity (GO:2001257)	1/27	3.7	0.375074	0.546419	2.1947	2.1522	CTSS
Negative Regulation of MAPK Cascade (GO:0043409)	3/127	2.36	0.375394	0.546428	1.3816	1.3537	PTPRR;UCHL1;IL1B
Regulation of Neuron Differentiation (GO:0045664)	2/76	2.63	0.378221	0.549162	1.5429	1.5001	HEY1;NRCAM
Positive Regulation of Protein Secretion (GO:0050714)	2/76	2.63	0.378221	0.549162	1.5429	1.5001	TGFB2;ANKRD1
Protein Deubiquitination (GO:0016579)	2/76	2.63	0.378221	0.549162	1.5429	1.5001	UCHL1;ZC3H12A
Regulation of Non-Canonical NF-kappaB Signal Transduction (GO:1901222)	2/77	2.6	0.384367	0.552421	1.5223	1.4555	IL1B;ZC3H12A
Positive Regulation of Lymphocyte Proliferation (GO:0050671)	2/77	2.6	0.384367	0.552421	1.5223	1.4555	IL6;IL1B
Acylglycerol Catabolic Process (GO:0046464)	1/28	3.57	0.385868	0.552421	2.1133	2.0124	PNLIPRP3
Regulation of Monocyte Chemotaxis (GO:0090025)	1/28	3.57	0.385868	0.552421	2.1133	2.0124	SERPINE1
Regulation of Toll-Like Receptor 4 Signaling Pathway (GO:0034143)	1/28	3.57	0.385868	0.552421	2.1133	2.0124	SQSTM1
Sterol Biosynthetic Process (GO:0016126)	1/28	3.57	0.385868	0.552421	2.1133	2.0124	TM7SF2
Establishment of Endothelial Barrier (GO:0061028)	1/28	3.57	0.385868	0.552421	2.1133	2.0124	ICAM1
Hydrogen Peroxide Metabolic Process (GO:0042743)	1/28	3.57	0.385868	0.552421	2.1133	2.0124	PRDX1
Negative Regulation of Signaling (GO:0023057)	1/28	3.57	0.385868	0.552421	2.1133	2.0124	IL1B
Positive Regulation of ATP Metabolic Process (GO:1903580)	1/28	3.57	0.385868	0.552421	2.1133	2.0124	UCHL1
Positive Regulation of G Protein-Coupled Receptor Signaling Pathway (GO:0045745)	1/28	3.57	0.385868	0.552421	2.1133	2.0124	C3
Positive Regulation of Fibroblast Proliferation (GO:0048146)	1/28	3.57	0.385868	0.552421	2.1133	2.0124	EREG
Positive Regulation of Mitotic Cell Cycle (GO:0045931)	1/28	3.57	0.385868	0.552421	2.1133	2.0124	ASNS
Positive Regulation of Response to Endoplasmic Reticulum Stress (GO:1905898)	1/28	3.57	0.385868	0.552421	2.1133	2.0124	DDIT3
Primary Neural Tube Formation (GO:0014020)	1/28	3.57	0.385868	0.552421	2.1133	2.0124	TGFB2
Regulation of DNA Biosynthetic Process (GO:2000278)	1/28	3.57	0.385868	0.552421	2.1133	2.0124	ANKRD1
Regulation of Calcium Ion Transmembrane Transport (GO:1903169)	1/28	3.57	0.385868	0.552421	2.1133	2.0124	PRNP
Positive Regulation of Catabolic Process (GO:0009896)	4/183	2.19	0.388282	0.55542	1.2763	1.2074	IL1B;ZC3H12A;SQSTM1;OAZ3
Fatty Acid Metabolic Process (GO:0006631)	3/130	2.31	0.389415	0.556582	1.3488	1.2721	ACSL5;CPT1C;PNLIPRP3
Cell Chemotaxis (GO:0060326)	2/78	2.56	0.390486	0.557654	1.5021	1.4126	CCL20;HBEGF
Regulation of Tumor Necrosis Factor Production (GO:0032680)	3/131	2.29	0.394072	0.561281	1.3382	1.2462	IL6;ZC3H12A;HSPB1
Regulation of Dendrite Morphogenesis (GO:0048814)	1/29	3.45	0.396477	0.561281	2.0377	1.8851	CDKL3
Regulation of Long-Term Synaptic Potentiation (GO:1900271)	1/29	3.45	0.396477	0.561281	2.0377	1.8851	SQSTM1
Regulation of Platelet Activation (GO:0010543)	1/29	3.45	0.396477	0.561281	2.0377	1.8851	SLC48A1
Regulation of Supramolecular Fiber Organization (GO:1902903)	1/29	3.45	0.396477	0.561281	2.0377	1.8851	CSF3
Tube Closure (GO:0060606)	1/29	3.45	0.396477	0.561281	2.0377	1.8851	TGFB2
Negative Regulation of Interleukin-1 Production (GO:0032692)	1/29	3.45	0.396477	0.561281	2.0377	1.8851	ZC3H12A
Negative Regulation of Wound Healing (GO:0061045)	1/29	3.45	0.396477	0.561281	2.0377	1.8851	SERPINE1
Positive Regulation of Defense Response to Virus by Host (GO:0002230)	1/29	3.45	0.396477	0.561281	2.0377	1.8851	ZC3H12A
Positive Regulation of Protein Import Into Nucleus (GO:0042307)	1/29	3.45	0.396477	0.561281	2.0377	1.8851	ZC3H12A
RNA Catabolic Process (GO:0006401)	2/79	2.53	0.396578	0.561281	1.4826	1.3712	ZC3H12A;HSPA1B
Circulatory System Development (GO:0072359)	3/132	2.27	0.39872	0.563503	1.3278	1.2209	POPDC3;TGFB2;HEY1
Cholesterol Homeostasis (GO:0042632)	2/80	2.5	0.402643	0.563503	1.4635	1.3313	AKR1C1;PNLIPRP3
Negative Regulation of Cellular Component Organization (GO:0051129)	2/80	2.5	0.402643	0.563503	1.4635	1.3313	DNAJA4;HSPA1B
Proteolysis Involved in Protein Catabolic Process (GO:0051603)	2/80	2.5	0.402643	0.563503	1.4635	1.3313	CTSW;CTSS
Regulation of Keratinocyte Differentiation (GO:0045616)	1/30	3.33	0.406903	0.563503	1.9673	1.769	TRIM16
T Cell Activation Involved in Immune Response (GO:0002286)	1/30	3.33	0.406903	0.563503	1.9673	1.769	ICAM1
Regulation of Mitochondrion Organization (GO:0010821)	1/30	3.33	0.406903	0.563503	1.9673	1.769	SQSTM1
Cardiac Muscle Tissue Morphogenesis (GO:0055008)	1/30	3.33	0.406903	0.563503	1.9673	1.769	ANKRD1
Cellular Response to Acid Chemical (GO:0071229)	1/30	3.33	0.406903	0.563503	1.9673	1.769	SESN2
Regulation of Transmembrane Transport (GO:0034762)	1/30	3.33	0.406903	0.563503	1.9673	1.769	TRIB3
Regulation of Vasoconstriction (GO:0019229)	1/30	3.33	0.406903	0.563503	1.9673	1.769	ADM
Glycosphingolipid Biosynthetic Process (GO:0006688)	1/30	3.33	0.406903	0.563503	1.9673	1.769	ST6GALNAC4
Hexose Biosynthetic Process (GO:0019319)	1/30	3.33	0.406903	0.563503	1.9673	1.769	ATF4
Negative Regulation of Antigen Receptor-Mediated Signaling Pathway (GO:0050858)	1/30	3.33	0.406903	0.563503	1.9673	1.769	PRNP
Negative Regulation of Cell-Matrix Adhesion (GO:0001953)	1/30	3.33	0.406903	0.563503	1.9673	1.769	SERPINE1
Neural Tube Closure (GO:0001843)	1/30	3.33	0.406903	0.563503	1.9673	1.769	TGFB2
Positive Regulation of Calcium-Mediated Signaling (GO:0050850)	1/30	3.33	0.406903	0.563503	1.9673	1.769	PRNP
Positive Regulation of Catalytic Activity (GO:0043085)	1/30	3.33	0.406903	0.563503	1.9673	1.769	B3GAT3
Positive Regulation of Cation Channel Activity (GO:2001259)	1/30	3.33	0.406903	0.563503	1.9673	1.769	CTSS
Positive Regulation of Interleukin-10 Production (GO:0032733)	1/30	3.33	0.406903	0.563503	1.9673	1.769	IL6
Positive Regulation of Microtubule Polymerization (GO:0031116)	1/30	3.33	0.406903	0.563503	1.9673	1.769	HSPA1B
Positive Regulation of Nitric Oxide Biosynthetic Process (GO:0045429)	1/30	3.33	0.406903	0.563503	1.9673	1.769	IL1B
Positive Regulation of Peptidyl-Serine Phosphorylation (GO:0033138)	1/30	3.33	0.406903	0.563503	1.9673	1.769	IL6
Protein Insertion Into ER Membrane (GO:0045048)	1/30	3.33	0.406903	0.563503	1.9673	1.769	RAB5IF
Pyroptotic Inflammatory Response (GO:0070269)	1/30	3.33	0.406903	0.563503	1.9673	1.769	CASP1
Regulation of Bone Resorption (GO:0045124)	1/30	3.33	0.406903	0.563503	1.9673	1.769	IL6
Regulation of Chemotaxis (GO:0050920)	1/30	3.33	0.406903	0.563503	1.9673	1.769	CCL26
Sterol Homeostasis (GO:0055092)	2/81	2.47	0.408678	0.564164	1.4449	1.2929	AKR1C1;PNLIPRP3
Negative Regulation of Cell Cycle (GO:0045786)	2/81	2.47	0.408678	0.564164	1.4449	1.2929	TSPYL2;NUPR1
Negative Regulation of Neuron Apoptotic Process (GO:0043524)	2/81	2.47	0.408678	0.564164	1.4449	1.2929	SOD2;ATF4
Protein Modification by Small Protein Removal (GO:0070646)	2/81	2.47	0.408678	0.564164	1.4449	1.2929	UCHL1;ZC3H12A
Mitochondrion Organization (GO:0007005)	3/135	2.22	0.412603	0.567296	1.2974	1.1485	SIRT4;BID;RAB5IF
Negative Regulation of Blood Vessel Morphogenesis (GO:2000181)	2/82	2.44	0.414683	0.567296	1.4267	1.2559	SLC48A1;TGFB2
Positive Regulation of Tumor Necrosis Factor Production (GO:0032760)	2/82	2.44	0.414683	0.567296	1.4267	1.2559	IL6;HSPB1
Regulation of Immunoglobulin Production (GO:0002637)	1/31	3.23	0.417149	0.567296	1.9016	1.6626	IL6
Activation of GTPase Activity (GO:0090630)	1/31	3.23	0.417149	0.567296	1.9016	1.6626	TBC1D7
Antigen Processing and Presentation of Exogenous Peptide Antigen (GO:0002478)	1/31	3.23	0.417149	0.567296	1.9016	1.6626	CTSS
Artery Morphogenesis (GO:0048844)	1/31	3.23	0.417149	0.567296	1.9016	1.6626	TGFB2
Regulation of Spindle Assembly (GO:0090169)	1/31	3.23	0.417149	0.567296	1.9016	1.6626	HSPA1B
Regulation of Stress-Activated MAPK Cascade (GO:0032872)	1/31	3.23	0.417149	0.567296	1.9016	1.6626	TGFB2
Regulation of Transcription by RNA Polymerase I (GO:0006356)	1/31	3.23	0.417149	0.567296	1.9016	1.6626	ATF4
Chromosome Condensation (GO:0030261)	1/31	3.23	0.417149	0.567296	1.9016	1.6626	AKAP8L
Leukocyte Cell-Cell Adhesion (GO:0007159)	1/31	3.23	0.417149	0.567296	1.9016	1.6626	ICAM1
Mesenchymal Cell Migration (GO:0090497)	1/31	3.23	0.417149	0.567296	1.9016	1.6626	RADIL
Negative Regulation of Carbohydrate Metabolic Process (GO:0045912)	1/31	3.23	0.417149	0.567296	1.9016	1.6626	NUPR1
Negative Regulation of Insulin Receptor Signaling Pathway (GO:0046627)	1/31	3.23	0.417149	0.567296	1.9016	1.6626	IL1B
Positive Regulation of D-glucose Transmembrane Transport (GO:0010828)	1/31	3.23	0.417149	0.567296	1.9016	1.6626	C3
Positive Regulation of Lamellipodium Organization (GO:1902745)	1/31	3.23	0.417149	0.567296	1.9016	1.6626	ENPP2
Positive Regulation of Nitric Oxide Metabolic Process (GO:1904407)	1/31	3.23	0.417149	0.567296	1.9016	1.6626	IL1B
Regulation of Centrosome Duplication (GO:0010824)	1/31	3.23	0.417149	0.567296	1.9016	1.6626	C10ORF90
Organophosphate Metabolic Process (GO:0019637)	2/83	2.41	0.420658	0.571621	1.4091	1.2202	PLPP5;PLA2G4C
Generation of Neurons (GO:0048699)	4/192	2.08	0.423222	0.572038	1.2146	1.0444	TGFB2;DDIT4;ID3;NRCAM
Monoatomic Cation Homeostasis (GO:0055080)	2/84	2.38	0.426602	0.572038	1.3918	1.1857	HMOX1;SLC12A8
DNA Damage Response, Signal Transduction by P53 Class Mediator (GO:0030330)	1/32	3.12	0.427219	0.572038	1.8402	1.565	SESN2
Regulation of Lamellipodium Assembly (GO:0010591)	1/32	3.12	0.427219	0.572038	1.8402	1.565	SLC48A1
Bile Acid Metabolic Process (GO:0008206)	1/32	3.12	0.427219	0.572038	1.8402	1.565	AKR1C1
Response to Amino Acid (GO:0043200)	1/32	3.12	0.427219	0.572038	1.8402	1.565	SESN2
Response to Estrogen (GO:0043627)	1/32	3.12	0.427219	0.572038	1.8402	1.565	GSTM3
Sphingolipid Catabolic Process (GO:0030149)	1/32	3.12	0.427219	0.572038	1.8402	1.565	ENPP2
Extrinsic Apoptotic Signaling Pathway via Death Domain Receptors (GO:0008625)	1/32	3.12	0.427219	0.572038	1.8402	1.565	BID
Lipid Droplet Organization (GO:0034389)	1/32	3.12	0.427219	0.572038	1.8402	1.565	PLA2G4C
Membrane Depolarization (GO:0051899)	1/32	3.12	0.427219	0.572038	1.8402	1.565	CHRNE
Mitochondrial Membrane Organization (GO:0007006)	1/32	3.12	0.427219	0.572038	1.8402	1.565	PPIF
Negative Regulation of Cellular Response to Insulin Stimulus (GO:1900077)	1/32	3.12	0.427219	0.572038	1.8402	1.565	IL1B
Negative Regulation of Interleukin-6 Production (GO:0032715)	1/32	3.12	0.427219	0.572038	1.8402	1.565	ZC3H12A
Non-Motile Cilium Assembly (GO:1905515)	1/32	3.12	0.427219	0.572038	1.8402	1.565	TMEM17
Positive Regulation of Locomotion (GO:0040017)	1/32	3.12	0.427219	0.572038	1.8402	1.565	CCL26
Protein Targeting to Vacuole (GO:0006623)	1/32	3.12	0.427219	0.572038	1.8402	1.565	SQSTM1
Purine Ribonucleoside Triphosphate Metabolic Process (GO:0009205)	1/32	3.12	0.427219	0.572038	1.8402	1.565	HSPA1B
Regulation of Cell Migration Involved in Sprouting Angiogenesis (GO:0090049)	1/32	3.12	0.427219	0.572038	1.8402	1.565	HMOX1
Membraneless Organelle Assembly (GO:0140694)	3/139	2.16	0.430954	0.576597	1.259	1.0597	TMOD1;PLA2G4C;SQSTM1
Actomyosin Structure Organization (GO:0031032)	2/85	2.35	0.432513	0.576905	1.375	1.1524	TMOD1;ANKRD1
Negative Regulation of Transforming Growth Factor Beta Receptor Signaling Pathway (GO:0030512)	2/85	2.35	0.432513	0.576905	1.375	1.1524	BAMBI;HTRA3
Positive Regulation of Endocytosis (GO:0045807)	2/85	2.35	0.432513	0.576905	1.375	1.1524	C3;SERPINE1
Positive Regulation of Tumor Necrosis Factor Superfamily Cytokine Production (GO:1903557)	2/85	2.35	0.432513	0.576905	1.375	1.1524	IL6;HSPB1
Actin Filament Bundle Assembly (GO:0051017)	1/33	3.03	0.437115	0.579044	1.7826	1.4752	LIMD2
Signal Release From Synapse (GO:0099643)	1/33	3.03	0.437115	0.579044	1.7826	1.4752	LIN7B
Ventricular Cardiac Muscle Tissue Morphogenesis (GO:0055010)	1/33	3.03	0.437115	0.579044	1.7826	1.4752	TGFB2
Negative Regulation of Developmental Growth (GO:0048640)	1/33	3.03	0.437115	0.579044	1.7826	1.4752	CDKL3
Negative Regulation of Lipid Metabolic Process (GO:0045833)	1/33	3.03	0.437115	0.579044	1.7826	1.4752	IL1B
Positive Regulation of Notch Signaling Pathway (GO:0045747)	1/33	3.03	0.437115	0.579044	1.7826	1.4752	TGFB2
Regulation of Activated T Cell Proliferation (GO:0046006)	1/33	3.03	0.437115	0.579044	1.7826	1.4752	PRNP
Regulation of Amyloid-Beta Formation (GO:1902003)	1/33	3.03	0.437115	0.579044	1.7826	1.4752	PRNP
Regulation of calcineurin-NFAT Signaling Cascade (GO:0070884)	1/33	3.03	0.437115	0.579044	1.7826	1.4752	PRNP
Regulation of Innate Immune Response (GO:0045088)	2/86	2.33	0.438392	0.580293	1.3585	1.1203	EREG;BIRC3
Plasma Membrane Bounded Cell Projection Organization (GO:0120036)	3/141	2.13	0.440053	0.582049	1.2406	1.0184	IL6;ZFYVE27;IQCG
Regulation of Endothelial Cell Proliferation (GO:0001936)	2/87	2.3	0.444238	0.583478	1.3425	1.0893	ANGPT1;CCL26
Regulation of Cell Adhesion (GO:0030155)	3/142	2.11	0.444582	0.583478	1.2316	0.9984	SLC48A1;CXCL8;ANGPT1
Regulation of Cell Migration (GO:0030334)	9/479	1.88	0.444805	0.583478	1.0934	0.8858	LIMCH1;IL1B;SERPINE1;GCNT2;ENPP2;SOD2;CLDN1;HBEGF;CCL26
JNK Cascade (GO:0007254)	1/34	2.94	0.446841	0.583478	1.7285	1.3924	MAP3K10
Actin Filament Bundle Organization (GO:0061572)	1/34	2.94	0.446841	0.583478	1.7285	1.3924	LIMD2
Cellular Response to Osmotic Stress (GO:0071470)	1/34	2.94	0.446841	0.583478	1.7285	1.3924	CASP1
Response to Exogenous dsRNA (GO:0043330)	1/34	2.94	0.446841	0.583478	1.7285	1.3924	SLC3A2
Sarcomere Organization (GO:0045214)	1/34	2.94	0.446841	0.583478	1.7285	1.3924	ANKRD1
Triglyceride Homeostasis (GO:0070328)	1/34	2.94	0.446841	0.583478	1.7285	1.3924	ANGPTL4
Liver Development (GO:0001889)	1/34	2.94	0.446841	0.583478	1.7285	1.3924	IL6
Negative Regulation of Blood Vessel Endothelial Cell Migration (GO:0043537)	1/34	2.94	0.446841	0.583478	1.7285	1.3924	SLC48A1
Phospholipid Dephosphorylation (GO:0046839)	1/34	2.94	0.446841	0.583478	1.7285	1.3924	PLPP5
Positive Regulation of Carbohydrate Metabolic Process (GO:0045913)	1/34	2.94	0.446841	0.583478	1.7285	1.3924	UCHL1
Positive Regulation of Establishment of Protein Localization (GO:1904951)	1/34	2.94	0.446841	0.583478	1.7285	1.3924	PRNP
Positive Regulation of Transcription by RNA Polymerase I (GO:0045943)	1/34	2.94	0.446841	0.583478	1.7285	1.3924	ATF4
Regulation of JUN Kinase Activity (GO:0043506)	1/34	2.94	0.446841	0.583478	1.7285	1.3924	MAP3K10
Regulation of Cardiac Muscle Contraction (GO:0055117)	1/34	2.94	0.446841	0.583478	1.7285	1.3924	ZC3H12A
Protein Homooligomerization (GO:0051260)	3/143	2.1	0.449096	0.585907	1.2227	0.9788	AKR1C1;SLC1A5;SOD2
T Cell Receptor Signaling Pathway (GO:0050852)	2/88	2.27	0.450049	0.585907	1.3268	1.0593	NFKBIZ;ZC3H12A
Positive Regulation of Protein Kinase Activity (GO:0045860)	2/88	2.27	0.450049	0.585907	1.3268	1.0593	TGFB2;EREG
Positive Regulation of Ubiquitin-Dependent Protein Catabolic Process (GO:2000060)	2/88	2.27	0.450049	0.585907	1.3268	1.0593	TRIB3;HSPA1B
Acetylcholine Receptor Signaling Pathway (GO:0095500)	1/35	2.86	0.456399	0.588443	1.6776	1.3159	CHRNE
Regulation of Neuronal Synaptic Plasticity (GO:0048168)	1/35	2.86	0.456399	0.588443	1.6776	1.3159	SYP
Response to Transforming Growth Factor Beta (GO:0071559)	1/35	2.86	0.456399	0.588443	1.6776	1.3159	ANKRD1
Skeletal Muscle Organ Development (GO:0060538)	1/35	2.86	0.456399	0.588443	1.6776	1.3159	POPDC3
Substrate Adhesion-Dependent Cell Spreading (GO:0034446)	1/35	2.86	0.456399	0.588443	1.6776	1.3159	RADIL
Negative Regulation of Myeloid Leukocyte Differentiation (GO:0002762)	1/35	2.86	0.456399	0.588443	1.6776	1.3159	TNFAIP6
Negative Regulation of Osteoblast Differentiation (GO:0045668)	1/35	2.86	0.456399	0.588443	1.6776	1.3159	TNFAIP6
Neural Crest Cell Migration (GO:0001755)	1/35	2.86	0.456399	0.588443	1.6776	1.3159	RADIL
Neurotransmitter Secretion (GO:0007269)	1/35	2.86	0.456399	0.588443	1.6776	1.3159	LIN7B
Phospholipid Translocation (GO:0045332)	1/35	2.86	0.456399	0.588443	1.6776	1.3159	ABCB1
Platelet Aggregation (GO:0070527)	1/35	2.86	0.456399	0.588443	1.6776	1.3159	HSPB1
Positive Regulation of Axonogenesis (GO:0050772)	1/35	2.86	0.456399	0.588443	1.6776	1.3159	ZFYVE27
Positive Regulation of Mononuclear Cell Migration (GO:0071677)	1/35	2.86	0.456399	0.588443	1.6776	1.3159	SERPINE1
Mitochondrial Respiratory Chain Complex Assembly (GO:0033108)	2/90	2.22	0.461569	0.594668	1.2965	1.0024	COX19;RAB5IF
DNA-templated Transcription (GO:0006351)	4/203	1.97	0.465222	0.597452	1.1468	0.8776	PIR;EREG;ATF4;NFKBIB
Carboxylic Acid Metabolic Process (GO:0019752)	1/36	2.78	0.465792	0.597452	1.6296	1.245	SIRT4
Embryonic Limb Morphogenesis (GO:0030326)	1/36	2.78	0.465792	0.597452	1.6296	1.245	TGFB2
tRNA Aminoacylation for Protein Translation (GO:0006418)	1/36	2.78	0.465792	0.597452	1.6296	1.245	GARS1
Peptidyl-Threonine Phosphorylation (GO:0018107)	1/36	2.78	0.465792	0.597452	1.6296	1.245	MAP3K10
Positive Regulation of Immune Effector Process (GO:0002699)	1/36	2.78	0.465792	0.597452	1.6296	1.245	IL1B
Positive Regulation of Metabolic Process (GO:0009893)	3/147	2.04	0.467001	0.598471	1.1885	0.905	AKR1C1;ZC3H12A;AKR1C3
ERAD Pathway (GO:0036503)	2/91	2.2	0.467276	0.598471	1.2819	0.9753	MMP1;FBXO6
Regulation of Cell Cycle (GO:0051726)	6/318	1.89	0.469966	0.601473	1.0973	0.8286	TSPYL2;BEX2;TGFB2;GADD45B;NUPR1;BIRC3
Sensory Perception of Mechanical Stimulus (GO:0050954)	2/92	2.17	0.472946	0.604387	1.2676	0.9491	ATP6V0A4;CRYM
Positive Regulation of Response to Stimulus (GO:0048584)	2/92	2.17	0.472946	0.604387	1.2676	0.9491	TGFB2;AKR1C1
Anterograde Axonal Transport (GO:0008089)	1/37	2.7	0.475024	0.604387	1.5842	1.1793	HSPB1
Regulation of Receptor Internalization (GO:0002090)	1/37	2.7	0.475024	0.604387	1.5842	1.1793	ANGPT1
Cardiac Muscle Cell Action Potential Involved in Contraction (GO:0086002)	1/37	2.7	0.475024	0.604387	1.5842	1.1793	KCNE4
Intrinsic Apoptotic Signaling Pathway by P53 Class Mediator (GO:0072332)	1/37	2.7	0.475024	0.604387	1.5842	1.1793	DDIT4
Muscle Cell Differentiation (GO:0042692)	1/37	2.7	0.475024	0.604387	1.5842	1.1793	POPDC3
Regulation of Cellular Component Biogenesis (GO:0044087)	1/37	2.7	0.475024	0.604387	1.5842	1.1793	SLC48A1
Cellular Response to Growth Factor Stimulus (GO:0071363)	3/150	2	0.480259	0.609681	1.1641	0.8538	CXCL8;ANKRD1;HSPB1
Phosphate-Containing Compound Metabolic Process (GO:0006796)	3/150	2	0.480259	0.609681	1.1641	0.8538	PLPP5;PLA2G4C;GALM
Regulation of Defense Response to Virus by Host (GO:0050691)	1/38	2.63	0.484097	0.609681	1.5413	1.1182	ZC3H12A
Regulation of Erythrocyte Differentiation (GO:0045646)	1/38	2.63	0.484097	0.609681	1.5413	1.1182	HSPA1B
Regulation of Intracellular Protein Transport (GO:0033157)	1/38	2.63	0.484097	0.609681	1.5413	1.1182	B3GAT3
Aortic Valve Morphogenesis (GO:0003180)	1/38	2.63	0.484097	0.609681	1.5413	1.1182	HEY1
Regulation of Peptidyl-Serine Phosphorylation (GO:0033135)	1/38	2.63	0.484097	0.609681	1.5413	1.1182	IL6
Regulation of Vascular Associated Smooth Muscle Cell Proliferation (GO:1904705)	1/38	2.63	0.484097	0.609681	1.5413	1.1182	SOD2
Striated Muscle Tissue Development (GO:0014706)	1/38	2.63	0.484097	0.609681	1.5413	1.1182	POPDC3
mRNA Transcription by RNA Polymerase II (GO:0042789)	1/38	2.63	0.484097	0.609681	1.5413	1.1182	ATF4
Male Meiotic Nuclear Division (GO:0007140)	1/38	2.63	0.484097	0.609681	1.5413	1.1182	MEIOC
Negative Regulation of Transport (GO:0051051)	1/38	2.63	0.484097	0.609681	1.5413	1.1182	YRDC
Neuron Projection Extension (GO:1990138)	1/38	2.63	0.484097	0.609681	1.5413	1.1182	CDKL3
Positive Regulation of Immunoglobulin Production (GO:0002639)	1/38	2.63	0.484097	0.609681	1.5413	1.1182	IL6
Response to Calcium Ion (GO:0051592)	2/95	2.11	0.489738	0.61634	1.2265	0.8756	PPIF;AKR1C3
Protein Metabolic Process (GO:0019538)	11/614	1.79	0.492287	0.616444	1.0406	0.7374	CDKL3;UCHL1;NECAB3;MMP1;HTRA3;MMP3;CASP1;FBXO6;PRSS3;SQSTM1;CTSS
SCF-dependent Proteasomal Ubiquitin-Dependent Protein Catabolic Process (GO:0031146)	1/39	2.56	0.493013	0.616444	1.5007	1.0613	FBXO6
Vacuolar Transport (GO:0007034)	1/39	2.56	0.493013	0.616444	1.5007	1.0613	ATP6V0D2
Negative Regulation of G Protein-Coupled Receptor Signaling Pathway (GO:0045744)	1/39	2.56	0.493013	0.616444	1.5007	1.0613	CXCL8
Negative Regulation of T Cell Proliferation (GO:0042130)	1/39	2.56	0.493013	0.616444	1.5007	1.0613	PRNP
Negative Regulation of Cell-Substrate Adhesion (GO:0010812)	1/39	2.56	0.493013	0.616444	1.5007	1.0613	GCNT2
Positive Regulation of SMAD Protein Signal Transduction (GO:0060391)	1/39	2.56	0.493013	0.616444	1.5007	1.0613	TGFB2
Positive Regulation of Extrinsic Apoptotic Signaling Pathway (GO:2001238)	1/39	2.56	0.493013	0.616444	1.5007	1.0613	BID
Positive Regulation of Transferase Activity (GO:0051347)	1/39	2.56	0.493013	0.616444	1.5007	1.0613	TRIB3
Regulation of Signal Transduction (GO:0009966)	4/211	1.9	0.495077	0.618364	1.1021	0.7748	TSPYL2;PRNP;IRAK2;TIMP1
Sensory Perception of Sound (GO:0007605)	2/96	2.08	0.495261	0.618364	1.2134	0.8526	ATP6V0A4;CRYM
Muscle Contraction (GO:0006936)	2/97	2.06	0.500745	0.620702	1.2006	0.8304	TMOD1;CHRNE
Regulation of TORC1 Signaling (GO:1903432)	2/97	2.06	0.500745	0.620702	1.2006	0.8304	SESN2;TBC1D7
Regulation of Cytokine-Mediated Signaling Pathway (GO:0001959)	1/40	2.5	0.501776	0.620702	1.4621	1.0083	IRAK2
Cellular Response to Amino Acid Stimulus (GO:0071230)	1/40	2.5	0.501776	0.620702	1.4621	1.0083	SESN2
Constitutive Heterochromatin Formation (GO:0140719)	1/40	2.5	0.501776	0.620702	1.4621	1.0083	CENPV
Establishment of Protein Localization to Extracellular Region (GO:0035592)	1/40	2.5	0.501776	0.620702	1.4621	1.0083	NECAB3
Female Gamete Generation (GO:0007292)	1/40	2.5	0.501776	0.620702	1.4621	1.0083	EREG
Positive Regulation of Cytokinesis (GO:0032467)	1/40	2.5	0.501776	0.620702	1.4621	1.0083	CENPV
Positive Regulation of Lipid Biosynthetic Process (GO:0046889)	1/40	2.5	0.501776	0.620702	1.4621	1.0083	SIRT4
Positive Regulation of Proteolysis Involved in Protein Catabolic Process (GO:1903052)	1/40	2.5	0.501776	0.620702	1.4621	1.0083	NUPR1
Regulation of DNA Recombination (GO:0000018)	1/40	2.5	0.501776	0.620702	1.4621	1.0083	IL7R
Regulation of T Cell Receptor Signaling Pathway (GO:0050856)	1/40	2.5	0.501776	0.620702	1.4621	1.0083	PRNP
Regulation of Apoptotic Signaling Pathway (GO:2001233)	1/40	2.5	0.501776	0.620702	1.4621	1.0083	TRAF1
Positive Regulation of Hydrolase Activity (GO:0051345)	2/98	2.04	0.506191	0.625274	1.188	0.8088	TBC1D7;CCL26
Positive Regulation of Supramolecular Fiber Organization (GO:1902905)	2/98	2.04	0.506191	0.625274	1.188	0.8088	CSF3;CCL26
Regulation of Heart Rate by Cardiac Conduction (GO:0086091)	1/41	2.44	0.510387	0.626893	1.4255	0.9588	KCNE4
RNA Stabilization (GO:0043489)	1/41	2.44	0.510387	0.626893	1.4255	0.9588	MEIOC
Regulation of Mitotic Spindle Organization (GO:0060236)	1/41	2.44	0.510387	0.626893	1.4255	0.9588	HSPA1B
Regulation of Monoatomic Ion Transmembrane Transporter Activity (GO:0032412)	1/41	2.44	0.510387	0.626893	1.4255	0.9588	PPIF
Aortic Valve Development (GO:0003176)	1/41	2.44	0.510387	0.626893	1.4255	0.9588	HEY1
Negative Regulation of Type I Interferon Production (GO:0032480)	1/41	2.44	0.510387	0.626893	1.4255	0.9588	RELB
Organelle Transport Along Microtubule (GO:0072384)	1/41	2.44	0.510387	0.626893	1.4255	0.9588	DYNC1I1
Positive Regulation of Immune System Process (GO:0002684)	1/41	2.44	0.510387	0.626893	1.4255	0.9588	TGFB2
Actin Filament Organization (GO:0007015)	3/158	1.9	0.514826	0.631301	1.1036	0.7327	TMOD1;XIRP1;ARHGAP25
Acylglycerol Metabolic Process (GO:0006639)	1/42	2.38	0.51885	0.631301	1.3907	0.9125	DGKG
Blood Vessel Diameter Maintenance (GO:0097746)	1/42	2.38	0.51885	0.631301	1.3907	0.9125	GCLM
Ceramide Biosynthetic Process (GO:0046513)	1/42	2.38	0.51885	0.631301	1.3907	0.9125	ST6GALNAC4
Defense Response to Fungus (GO:0050832)	1/42	2.38	0.51885	0.631301	1.3907	0.9125	SLC48A1
Skeletal Muscle Tissue Development (GO:0007519)	1/42	2.38	0.51885	0.631301	1.3907	0.9125	POPDC3
Type I Interferon-Mediated Signaling Pathway (GO:0060337)	1/42	2.38	0.51885	0.631301	1.3907	0.9125	OASL
Heterophilic Cell-Cell Adhesion via Plasma Membrane Cell Adhesion Molecules (GO:0007157)	1/42	2.38	0.51885	0.631301	1.3907	0.9125	ICAM1
Positive Regulation of Neuron Differentiation (GO:0045666)	1/42	2.38	0.51885	0.631301	1.3907	0.9125	NRCAM
Potassium Ion Import Across Plasma Membrane (GO:1990573)	1/42	2.38	0.51885	0.631301	1.3907	0.9125	SLC12A8
Protein Destabilization (GO:0031648)	1/42	2.38	0.51885	0.631301	1.3907	0.9125	PRNP
Regulation of Chromosome Organization (GO:0033044)	1/42	2.38	0.51885	0.631301	1.3907	0.9125	CENPV
Epithelium Development (GO:0060429)	3/159	1.89	0.519061	0.631301	1.0964	0.719	TGFB2;AKR1C1;CD34
Neuron Development (GO:0048666)	3/159	1.89	0.519061	0.631301	1.0964	0.719	TGFB2;IL6;ZFYVE27
Skeletal System Development (GO:0001501)	3/160	1.88	0.523276	0.635982	1.0894	0.7055	TGFB2;COL27A1;PRDX1
Cell Cycle G2/M Phase Transition (GO:0044839)	1/43	2.33	0.527168	0.637147	1.3575	0.8691	AKAP8L
Cellular Response to Type I Interferon (GO:0071357)	1/43	2.33	0.527168	0.637147	1.3575	0.8691	OASL
Mitochondrial Transport (GO:0006839)	1/43	2.33	0.527168	0.637147	1.3575	0.8691	PPIF
Negative Regulation of mRNA Catabolic Process (GO:1902373)	1/43	2.33	0.527168	0.637147	1.3575	0.8691	MEIOC
Neural Crest Cell Development (GO:0014032)	1/43	2.33	0.527168	0.637147	1.3575	0.8691	RADIL
Positive Regulation of Myeloid Leukocyte Differentiation (GO:0002763)	1/43	2.33	0.527168	0.637147	1.3575	0.8691	TM4SF19
Positive Regulation of Production of Molecular Mediator of Immune Response (GO:0002702)	1/43	2.33	0.527168	0.637147	1.3575	0.8691	IL6
Positive Regulation of Stress Fiber Assembly (GO:0051496)	1/43	2.33	0.527168	0.637147	1.3575	0.8691	LIMCH1
Supramolecular Fiber Organization (GO:0097435)	6/339	1.77	0.531957	0.642489	1.027	0.6482	TMOD1;TGFB2;TNFAIP6;XIRP1;BID;ARHGAP25
Response to Amino Acid Starvation (GO:1990928)	1/44	2.27	0.535342	0.642558	1.3259	0.8285	SESN2
Substantia Nigra Development (GO:0021762)	1/44	2.27	0.535342	0.642558	1.3259	0.8285	RRAD
Water-Soluble Vitamin Metabolic Process (GO:0006767)	1/44	2.27	0.535342	0.642558	1.3259	0.8285	VNN1
Negative Regulation of Organelle Organization (GO:0010639)	1/44	2.27	0.535342	0.642558	1.3259	0.8285	PPIF
Negative Regulation of Protein Modification Process (GO:0031400)	1/44	2.27	0.535342	0.642558	1.3259	0.8285	ZC3H12A
Peptidyl-Threonine Modification (GO:0018210)	1/44	2.27	0.535342	0.642558	1.3259	0.8285	MAP3K10
Positive Regulation of Cell Division (GO:0051781)	1/44	2.27	0.535342	0.642558	1.3259	0.8285	CENPV
Positive Regulation of Response to Biotic Stimulus (GO:0002833)	1/44	2.27	0.535342	0.642558	1.3259	0.8285	EREG
Regulation of Autophagosome Assembly (GO:2000785)	1/44	2.27	0.535342	0.642558	1.3259	0.8285	NUPR1
Regulation of Actin Cytoskeleton Organization (GO:0032956)	2/104	1.92	0.538046	0.645358	1.1178	0.6928	SLC48A1;CSF3
Cellular Response to Ketone (GO:1901655)	1/45	2.22	0.543375	0.649955	1.2957	0.7903	AKR1C3
Collagen Fibril Organization (GO:0030199)	1/45	2.22	0.543375	0.649955	1.2957	0.7903	TGFB2
Endothelial Cell Migration (GO:0043542)	1/45	2.22	0.543375	0.649955	1.2957	0.7903	PRSS3
Positive Regulation of Cell-Matrix Adhesion (GO:0001954)	1/45	2.22	0.543375	0.649955	1.2957	0.7903	SLC48A1
Steroid Metabolic Process (GO:0008202)	2/106	1.89	0.548345	0.654891	1.0962	0.6586	AKR1C1;AKR1C3
Regulation of Fibroblast Proliferation (GO:0048145)	1/46	2.17	0.551269	0.654891	1.2668	0.7544	EREG
Regulation of Interleukin-10 Production (GO:0032653)	1/46	2.17	0.551269	0.654891	1.2668	0.7544	IL6
Regulation of Transport (GO:0051049)	1/46	2.17	0.551269	0.654891	1.2668	0.7544	YRDC
Homotypic Cell-Cell Adhesion (GO:0034109)	1/46	2.17	0.551269	0.654891	1.2668	0.7544	HSPB1
- Reg of Phosphatidylinositol 3-Kinase/Prot Kinase B Signal Transduction (GO:0051898)	1/46	2.17	0.551269	0.654891	1.2668	0.7544	DDIT3
Neurotransmitter Transport (GO:0006836)	1/46	2.17	0.551269	0.654891	1.2668	0.7544	LIN7B
Regulation of Calcium-Mediated Signaling (GO:0050848)	1/46	2.17	0.551269	0.654891	1.2668	0.7544	PRNP
Regulation of Cell-Cell Adhesion (GO:0022407)	1/46	2.17	0.551269	0.654891	1.2668	0.7544	PTPRR
Regulation of Cell-Substrate Adhesion (GO:0010810)	1/46	2.17	0.551269	0.654891	1.2668	0.7544	GCNT2
Dephosphorylation (GO:0016311)	2/107	1.87	0.553434	0.656566	1.0857	0.6423	PLPP5;PTPRR
Positive Regulation of Cell Growth (GO:0030307)	2/107	1.87	0.553434	0.656566	1.0857	0.6423	TGFB2;ZFYVE27
Regulation of mRNA Catabolic Process (GO:0061013)	1/47	2.13	0.559027	0.657368	1.2392	0.7207	ZC3H12A
Bicellular Tight Junction Assembly (GO:0070830)	1/47	2.13	0.559027	0.657368	1.2392	0.7207	CLDN1
Cardiac Conduction (GO:0061337)	1/47	2.13	0.559027	0.657368	1.2392	0.7207	KCNE4
Cellular Defense Response (GO:0006968)	1/47	2.13	0.559027	0.657368	1.2392	0.7207	NCF2
Cellular Response to Amino Acid Starvation (GO:0034198)	1/47	2.13	0.559027	0.657368	1.2392	0.7207	SESN2
Cellular Response to Radiation (GO:0071478)	1/47	2.13	0.559027	0.657368	1.2392	0.7207	RRAD
Cellular Response to Type II Interferon (GO:0071346)	1/47	2.13	0.559027	0.657368	1.2392	0.7207	CASP1
Chemokine-Mediated Signaling Pathway (GO:0070098)	1/47	2.13	0.559027	0.657368	1.2392	0.7207	CCL26
Chromosome Organization (GO:0051276)	1/47	2.13	0.559027	0.657368	1.2392	0.7207	CENPV
Stem Cell Differentiation (GO:0048863)	1/47	2.13	0.559027	0.657368	1.2392	0.7207	TGFB2
Positive Regulation of T Cell Mediated Immunity (GO:0002711)	1/47	2.13	0.559027	0.657368	1.2392	0.7207	IL1B
Positive Regulation of mRNA Catabolic Process (GO:0061014)	1/47	2.13	0.559027	0.657368	1.2392	0.7207	ZC3H12A
Positive Regulation of Pattern Recognition Receptor Signaling Pathway (GO:0062208)	1/47	2.13	0.559027	0.657368	1.2392	0.7207	OASL
Regulation of Proteasomal Ubiquitin-Dependent Protein Catabolic Process (GO:0032434)	2/109	1.83	0.563491	0.660967	1.0653	0.611	TRIB3;HSPA1B
Regulation of Macromolecule Biosynthetic Process (GO:0010556)	3/170	1.76	0.564279	0.660967	1.0236	0.5857	SLC48A1;ZC3H12A;NFKBIZ
Negative Regulation of RNA Biosynthetic Process (GO:1902679)	8/470	1.7	0.56507	0.660967	0.9862	0.5629	CSF2;HEY1;NMNAT1;DDIT3;ID3;MAP3K10;TRIB3;EREG
Blood Circulation (GO:0008015)	1/48	2.08	0.566652	0.660967	1.2128	0.6889	GCLM
Natural Killer Cell Activation (GO:0030101)	1/48	2.08	0.566652	0.660967	1.2128	0.6889	PRDX1
Negative Regulation of Tumor Necrosis Factor Production (GO:0032720)	1/48	2.08	0.566652	0.660967	1.2128	0.6889	ZC3H12A
Negative Regulation of Viral Genome Replication (GO:0045071)	1/48	2.08	0.566652	0.660967	1.2128	0.6889	OASL
Oligosaccharide Metabolic Process (GO:0009311)	1/48	2.08	0.566652	0.660967	1.2128	0.6889	ST6GALNAC4
Positive Regulation of Innate Immune Response (GO:0045089)	1/48	2.08	0.566652	0.660967	1.2128	0.6889	EREG
Positive Regulation of Kinase Activity (GO:0033674)	1/48	2.08	0.566652	0.660967	1.2128	0.6889	EREG
Positive Regulation of Leukocyte Cell-Cell Adhesion (GO:1903039)	1/48	2.08	0.566652	0.660967	1.2128	0.6889	IL6
Positive Regulation of Osteoblast Differentiation (GO:0045669)	1/48	2.08	0.566652	0.660967	1.2128	0.6889	IL6
Cell-Cell Adhesion via Plasma-Membrane Adhesion Molecules (GO:0098742)	3/171	1.75	0.56826	0.662398	1.0175	0.5751	TGFB2;CLDN1;ICAM1
Apoptotic Process (GO:0006915)	4/232	1.72	0.569755	0.663696	0.9995	0.5623	IL1B;DDIT4;MAP3K10;BID
Positive Regulation of GTPase Activity (GO:0043547)	2/111	1.8	0.573384	0.665687	1.0456	0.5816	TBC1D7;CCL26
Positive Regulation of T Cell Activation (GO:0050870)	2/111	1.8	0.573384	0.665687	1.0456	0.5816	IL6;IL1B
Regulation of Insulin Receptor Signaling Pathway (GO:0046626)	1/49	2.04	0.574145	0.665687	1.1874	0.6589	IL1B
Arachidonate Metabolic Process (GO:0019369)	1/49	2.04	0.574145	0.665687	1.1874	0.6589	PLA2G4C
mRNA Catabolic Process (GO:0006402)	1/49	2.04	0.574145	0.665687	1.1874	0.6589	HSPA1B
Positive Regulation of Intracellular Transport (GO:0032388)	1/49	2.04	0.574145	0.665687	1.1874	0.6589	B3GAT3
Proteoglycan Biosynthetic Process (GO:0030166)	1/49	2.04	0.574145	0.665687	1.1874	0.6589	B3GAT3
Cell Surface Receptor Protein Tyrosine Kinase Signaling Pathway (GO:0007169)	5/296	1.69	0.580963	0.669757	0.9786	0.5314	ZFYVE27;ANGPT1;DDIT4;HSPB1;PGF
Triglyceride Metabolic Process (GO:0006641)	1/50	2	0.581509	0.669757	1.1631	0.6306	PNLIPRP3
Negative Regulation of ERK1 and ERK2 Cascade (GO:0070373)	1/50	2	0.581509	0.669757	1.1631	0.6306	PTPRR
Negative Regulation of Phosphorylation (GO:0042326)	1/50	2	0.581509	0.669757	1.1631	0.6306	ZC3H12A
Negative Regulation of Protein Binding (GO:0032091)	1/50	2	0.581509	0.669757	1.1631	0.6306	XIRP1
Negative Regulation of Tumor Necrosis Factor Superfamily Cytokine Production (GO:1903556)	1/50	2	0.581509	0.669757	1.1631	0.6306	ZC3H12A
Positive Regulation of Developmental Growth (GO:0048639)	1/50	2	0.581509	0.669757	1.1631	0.6306	ZFYVE27
Positive Regulation of Fat Cell Differentiation (GO:0045600)	1/50	2	0.581509	0.669757	1.1631	0.6306	ZC3H12A
Positive Regulation of Lymphocyte Activation (GO:0051251)	1/50	2	0.581509	0.669757	1.1631	0.6306	IL6
Positive Regulation of Non-Canonical NF-kappaB Signal Transduction (GO:1901224)	1/50	2	0.581509	0.669757	1.1631	0.6306	IL1B
Lipid Transport (GO:0006869)	2/113	1.77	0.583114	0.67116	1.0267	0.5538	ABCC2;AKR1C1
Antigen Receptor-Mediated Signaling Pathway (GO:0050851)	2/114	1.75	0.587917	0.674072	1.0174	0.5404	ZC3H12A;NFKBIZ
Regulation of Interferon-Beta Production (GO:0032648)	1/51	1.96	0.588746	0.674072	1.1398	0.6038	RELB
Regulation of Lipid Metabolic Process (GO:0019216)	1/51	1.96	0.588746	0.674072	1.1398	0.6038	IL1B
Carboxylic Acid Transmembrane Transport (GO:1905039)	1/51	1.96	0.588746	0.674072	1.1398	0.6038	SLC13A3
Transcription Initiation-Coupled Chromatin Remodeling (GO:0045815)	1/51	1.96	0.588746	0.674072	1.1398	0.6038	EGR1
Macromolecule Glycosylation (GO:0043413)	1/51	1.96	0.588746	0.674072	1.1398	0.6038	GCNT2
Negative Regulation of Cell Projection Organization (GO:0031345)	1/51	1.96	0.588746	0.674072	1.1398	0.6038	PRNP
Positive Regulation of Actin Filament Bundle Assembly (GO:0032233)	1/51	1.96	0.588746	0.674072	1.1398	0.6038	LIMCH1
Signal Transduction by P53 Class Mediator (GO:0072331)	1/52	1.92	0.595859	0.679529	1.1174	0.5785	SESN2
Determination of Left/Right Symmetry (GO:0007368)	1/52	1.92	0.595859	0.679529	1.1174	0.5785	ENKUR
Glycoprotein Metabolic Process (GO:0009100)	1/52	1.92	0.595859	0.679529	1.1174	0.5785	FBXO6
Intrinsic Apoptotic Signaling Pathway in Response to DNA Damage (GO:0008630)	1/52	1.92	0.595859	0.679529	1.1174	0.5785	DDIT4
Positive Regulation of TORC1 Signaling (GO:1904263)	1/52	1.92	0.595859	0.679529	1.1174	0.5785	SESN2
Positive Regulation of Proteolysis (GO:0045862)	1/52	1.92	0.595859	0.679529	1.1174	0.5785	IL1B
Regulation of Intracellular Signal Transduction (GO:1902531)	5/302	1.66	0.598767	0.682398	0.9585	0.4916	IL1B;AKR1C3;HSPB1;TRAF1;SQSTM1
Regulation of Release of Sequestered Calcium Ion Into Cytosol (GO:0051279)	1/53	1.89	0.602848	0.6857	1.0959	0.5546	CLIC2
Cellular Response to Ionizing Radiation (GO:0071479)	1/53	1.89	0.602848	0.6857	1.0959	0.5546	RRAD
Positive Regulation of B Cell Activation (GO:0050871)	1/53	1.89	0.602848	0.6857	1.0959	0.5546	IL6
Positive Regulation of Epithelial Cell Proliferation (GO:0050679)	2/118	1.69	0.60672	0.689314	0.9822	0.4908	CLDN1;CCL26
Neuron Differentiation (GO:0030182)	3/181	1.66	0.606818	0.689314	0.9598	0.4795	TGFB2;DDIT4;ID3
Apical Junction Assembly (GO:0043297)	1/54	1.85	0.609717	0.691252	1.0751	0.5319	CLDN1
Tight Junction Assembly (GO:0120192)	1/54	1.85	0.609717	0.691252	1.0751	0.5319	CLDN1
mRNA Destabilization (GO:0061157)	1/54	1.85	0.609717	0.691252	1.0751	0.5319	ZC3H12A
MAPK Cascade (GO:0000165)	2/119	1.68	0.611317	0.692614	0.9737	0.4792	MAP3K10;MAP3K14
Regulation of Transforming Growth Factor Beta Receptor Signaling Pathway (GO:0017015)	2/120	1.67	0.615874	0.696633	0.9654	0.4679	BAMBI;HTRA3
Dicarboxylic Acid Metabolic Process (GO:0043648)	1/55	1.82	0.616468	0.696633	1.0552	0.5104	GCLM
Interferon-Mediated Signaling Pathway (GO:0140888)	1/55	1.82	0.616468	0.696633	1.0552	0.5104	OASL
Positive Regulation of Protein Localization to Plasma Membrane (GO:1903078)	1/55	1.82	0.616468	0.696633	1.0552	0.5104	SQSTM1
Proteasomal Protein Catabolic Process (GO:0010498)	6/372	1.61	0.622569	0.701393	0.9328	0.442	UCHL1;MMP1;DDIT3;ZFAND2A;FBXO6;FBXL22
Regulation of Proteasomal Protein Catabolic Process (GO:0061136)	1/56	1.79	0.623102	0.701393	1.0359	0.49	NUPR1
Regulation of Protein Localization to Nucleus (GO:1900180)	1/56	1.79	0.623102	0.701393	1.0359	0.49	SESN2
Cellular Response to Alcohol (GO:0097306)	1/56	1.79	0.623102	0.701393	1.0359	0.49	AKR1C3
Cellular Response to Fibroblast Growth Factor Stimulus (GO:0044344)	1/56	1.79	0.623102	0.701393	1.0359	0.49	CXCL8
Response to Peptide Hormone (GO:0043434)	1/56	1.79	0.623102	0.701393	1.0359	0.49	TRIM16
mRNA Stabilization (GO:0048255)	1/57	1.75	0.629622	0.707358	1.0174	0.4707	MEIOC
Memory (GO:0007613)	1/57	1.75	0.629622	0.707358	1.0174	0.4707	PRNP
Positive Regulation of Protein Localization to Cell Periphery (GO:1904377)	1/57	1.75	0.629622	0.707358	1.0174	0.4707	SQSTM1
Regulation of Myoblast Differentiation (GO:0045661)	1/58	1.72	0.636029	0.711337	0.9995	0.4523	TMEM182
Eye Development (GO:0001654)	1/58	1.72	0.636029	0.711337	0.9995	0.4523	TGFB2
Intracellular Iron Ion Homeostasis (GO:0006879)	1/58	1.72	0.636029	0.711337	0.9995	0.4523	HMOX1
Mesenchymal Cell Differentiation (GO:0048762)	1/58	1.72	0.636029	0.711337	0.9995	0.4523	TGFB2
Muscle Organ Development (GO:0007517)	1/58	1.72	0.636029	0.711337	0.9995	0.4523	HBEGF
Positive Regulation of Type II Interferon Production (GO:0032729)	1/58	1.72	0.636029	0.711337	0.9995	0.4523	IL1B
Purine Ribonucleotide Metabolic Process (GO:0009150)	1/58	1.72	0.636029	0.711337	0.9995	0.4523	HSPA1B
Renal System Development (GO:0072001)	1/59	1.69	0.642326	0.71703	0.9822	0.4348	TGFB2
Protein Homotetramerization (GO:0051289)	1/59	1.69	0.642326	0.71703	0.9822	0.4348	SOD2
Calcium Ion Transport (GO:0006816)	2/126	1.59	0.642357	0.71703	0.9184	0.4065	SLC3A2;MCOLN2
Regulation of Anatomical Structure Morphogenesis (GO:0022603)	2/127	1.57	0.646628	0.721335	0.911	0.3972	IL6;HMOX1
Response to Retinoic Acid (GO:0032526)	1/60	1.67	0.648514	0.721586	0.9655	0.4181	TRIM16
Post-Transcriptional Regulation of Gene Expression (GO:0010608)	1/60	1.67	0.648514	0.721586	0.9655	0.4181	GCNT2
Protein Secretion (GO:0009306)	1/60	1.67	0.648514	0.721586	0.9655	0.4181	NECAB3
Regulation of SMAD Protein Signal Transduction (GO:0060390)	1/60	1.67	0.648514	0.721586	0.9655	0.4181	TGFB2
Phospholipid Transport (GO:0015914)	1/61	1.64	0.654595	0.727886	0.9494	0.4023	ABCB1
Regulation of Protein Catabolic Process (GO:0042176)	2/129	1.55	0.65505	0.727926	0.8966	0.3793	NQO1;OAZ3
Endomembrane System Organization (GO:0010256)	3/196	1.53	0.66023	0.732657	0.8846	0.3672	SYNGR2;SYP;SQSTM1
Antiviral Innate Immune Response (GO:0140374)	1/62	1.61	0.660572	0.732657	0.9338	0.3872	OASL
protein-DNA Complex Assembly (GO:0065004)	1/62	1.61	0.660572	0.732657	0.9338	0.3872	CENPV
Regulation of Gene Expression (GO:0010468)	18/1127	1.6	0.666348	0.738593	0.9205	0.3737	IL32;SLC48A1;EGR1;TGFB2;CSF2;CXCL8;ANGPT1;NFKB2;IL6;DNAJA4;DDIT3;IL1B;ZC3H12A;NFKBIZ;GCNT2;CD34;HSPA1B;ATF4
Epithelial Cell Differentiation (GO:0030855)	2/132	1.52	0.667382	0.739266	0.8758	0.3542	TGFB2;AKR1C1
Regulation of Synapse Assembly (GO:0051963)	1/64	1.56	0.672217	0.742257	0.904	0.3591	LIN7B
Monocarboxylic Acid Biosynthetic Process (GO:0072330)	1/64	1.56	0.672217	0.742257	0.904	0.3591	PNLIPRP3
Positive Regulation of T Cell Differentiation (GO:0045582)	1/64	1.56	0.672217	0.742257	0.904	0.3591	VNN1
Positive Regulation of Neurogenesis (GO:0050769)	1/64	1.56	0.672217	0.742257	0.904	0.3591	CDKL3
Positive Regulation of Phagocytosis (GO:0050766)	1/64	1.56	0.672217	0.742257	0.904	0.3591	C3
Transcription by RNA Polymerase II (GO:0006366)	3/200	1.5	0.673557	0.743265	0.8664	0.3424	ADRM1;PIR;ATF4
Potassium Ion Transmembrane Transport (GO:0071805)	2/134	1.49	0.675404	0.743795	0.8624	0.3384	KCNE4;SLC12A8
Regulation of GTPase Activity (GO:0043087)	2/134	1.49	0.675404	0.743795	0.8624	0.3384	TBC1D7;CCL26
Regulation of Cell Differentiation (GO:0045595)	3/201	1.49	0.676828	0.743795	0.862	0.3365	SLC6A6;HEY1;ATF4
Chloride Transmembrane Transport (GO:1902476)	1/65	1.54	0.677889	0.743795	0.8899	0.3459	SLC12A8
Negative Regulation of Autophagy (GO:0010507)	1/65	1.54	0.677889	0.743795	0.8899	0.3459	NUPR1
Positive Regulation of Cell Junction Assembly (GO:1901890)	1/65	1.54	0.677889	0.743795	0.8899	0.3459	SLC48A1
Positive Regulation of Organelle Assembly (GO:1902117)	1/65	1.54	0.677889	0.743795	0.8899	0.3459	CSF2
Protein Targeting to Membrane (GO:0006612)	1/65	1.54	0.677889	0.743795	0.8899	0.3459	GOLGA7B
Regulation of Cell-Matrix Adhesion (GO:0001952)	1/65	1.54	0.677889	0.743795	0.8899	0.3459	LIMCH1
Positive Regulation of Protein Metabolic Process (GO:0051247)	3/202	1.49	0.680075	0.745723	0.8576	0.3307	IL6;IL1B;OAZ3
Protein Targeting (GO:0006605)	2/136	1.47	0.683268	0.747552	0.8494	0.3235	GOLGA7B;ZFAND2A
Receptor-Mediated Endocytosis (GO:0006898)	2/136	1.47	0.683268	0.747552	0.8494	0.3235	CXCL8;ADM
Negative Regulation of Binding (GO:0051100)	1/66	1.52	0.683464	0.747552	0.8761	0.3334	XIRP1
Positive Regulation of MAP Kinase Activity (GO:0043406)	1/66	1.52	0.683464	0.747552	0.8761	0.3334	MAP3K10
Chordate Embryonic Development (GO:0043009)	1/67	1.49	0.688942	0.752597	0.8628	0.3215	PTPRR
Negative Regulation of Cytokine-Mediated Signaling Pathway (GO:0001960)	1/67	1.49	0.688942	0.752597	0.8628	0.3215	IL6
Action Potential (GO:0001508)	1/68	1.47	0.694326	0.756576	0.8499	0.31	KCNE4
Cholesterol Metabolic Process (GO:0008203)	1/68	1.47	0.694326	0.756576	0.8499	0.31	TM7SF2
Regulation of T Cell Activation (GO:0050863)	1/68	1.47	0.694326	0.756576	0.8499	0.31	TNFSF8
Regulation of Cell Communication (GO:0010646)	1/68	1.47	0.694326	0.756576	0.8499	0.31	TSPYL2
Negative Regulation of Cell Motility (GO:2000146)	2/139	1.44	0.694772	0.756588	0.8307	0.3025	LIMCH1;SERPINE1
Regulation of Translational Initiation (GO:0006446)	1/69	1.45	0.699617	0.761386	0.8373	0.2991	HSPB1
Proteasome-Mediated Ubiquitin-Dependent Protein Catabolic Process (GO:0043161)	5/340	1.47	0.700966	0.762377	0.8481	0.3013	UCHL1;DDIT3;ZFAND2A;FBXO6;FBXL22
Positive Regulation of DNA-templated Transcription (GO:0045893)	20/1274	1.57	0.701425	0.762399	0.903	0.3202	EGR1;BEX2;CSF3;TGFB2;AKAP8L;RELB;NFKB2;MLLT11;NFKBIA;IL6;HEY1;BAMBI;DDIT3;IL1B;ZC3H12A;TFEC;TRIM16;SQSTM1;ATF3;ATF4
Regulation of Heart Contraction (GO:0008016)	1/70	1.43	0.704816	0.764571	0.8252	0.2887	TGFB2
Fatty Acid Biosynthetic Process (GO:0006633)	1/70	1.43	0.704816	0.764571	0.8252	0.2887	PNLIPRP3
Peptidyl-Serine Phosphorylation (GO:0018105)	1/70	1.43	0.704816	0.764571	0.8252	0.2887	MAP3K10
Intracellular Monoatomic Cation Homeostasis (GO:0030003)	3/210	1.43	0.705183	0.764571	0.8241	0.2879	COX19;PRNP;HMOX1
Response to Ionizing Radiation (GO:0010212)	1/71	1.41	0.709926	0.768276	0.8133	0.2786	RRAD
tRNA Modification (GO:0006400)	1/71	1.41	0.709926	0.768276	0.8133	0.2786	YRDC
Phagocytosis (GO:0006909)	1/71	1.41	0.709926	0.768276	0.8133	0.2786	ARHGAP25
Kidney Development (GO:0001822)	1/72	1.39	0.714948	0.772688	0.8018	0.2691	TGFB2
Monoatomic Anion Transmembrane Transport (GO:0098656)	1/72	1.39	0.714948	0.772688	0.8018	0.2691	SLC12A8
Organelle Assembly (GO:0070925)	5/346	1.45	0.715336	0.772688	0.8329	0.279	GABARAPL1;TMEM17;MAP1LC3B2;CD34;SQSTM1
Protein Glycosylation (GO:0006486)	2/145	1.38	0.716746	0.77373	0.7956	0.265	GCNT2;GCNT3
Positive Regulation of TOR Signaling (GO:0032008)	1/73	1.37	0.719883	0.776576	0.7907	0.2599	SESN2
Negative Regulation of Protein Metabolic Process (GO:0051248)	2/146	1.37	0.720277	0.776576	0.79	0.2592	PRNP;NQO1
Negative Regulation of Transcription by RNA Polymerase II (GO:0000122)	11/732	1.5	0.721615	0.777536	0.8649	0.2822	NFKBIA;PRNP;HEY1;DDIT3;DNAJB4;TFEC;ID3;TRIB3;CRYM;ATF3;ATF4
Positive Regulation of Transcription by RNA Polymerase II (GO:0045944)	15/983	1.53	0.723788	0.779395	0.8775	0.2837	EGR1;BEX2;CSF3;AKAP8L;RELB;NFKB2;NFKBIA;IL6;HEY1;DDIT3;ZC3H12A;TFEC;SQSTM1;ATF3;ATF4
Sensory Organ Development (GO:0007423)	1/74	1.35	0.724732	0.779446	0.7798	0.2511	TGFB2
Negative Regulation of Apoptotic Signaling Pathway (GO:2001234)	1/74	1.35	0.724732	0.779446	0.7798	0.2511	PPIF
Regulation of Cold-Induced Thermogenesis (GO:0120161)	2/148	1.35	0.727227	0.781645	0.7791	0.2482	DDIT3;ATF4
Regulation of Stress Fiber Assembly (GO:0051492)	1/75	1.33	0.729498	0.783118	0.7692	0.2426	LIMCH1
Peptidyl-Serine Modification (GO:0018209)	1/75	1.33	0.729498	0.783118	0.7692	0.2426	MAP3K10
Glycoprotein Biosynthetic Process (GO:0009101)	1/76	1.32	0.734182	0.787173	0.7589	0.2345	GCNT2
Lymphocyte Differentiation (GO:0030098)	1/76	1.32	0.734182	0.787173	0.7589	0.2345	RELB
DNA Damage Response (GO:0006974)	6/421	1.43	0.736682	0.789367	0.8206	0.2508	RRAD;DDIT3;ZC3H12A;SIRT4;FBXO6;BID
Positive Regulation of RNA Biosynthetic Process (GO:1902680)	8/555	1.44	0.744864	0.797643	0.8293	0.2443	MLLT11;EGR1;IL6;BAMBI;DDIT3;IL1B;TRIM16;ATF4
Negative Regulation of Response to External Stimulus (GO:0032102)	2/154	1.3	0.747206	0.799259	0.7482	0.218	TNFAIP6;SERPINE1
Sphingolipid Metabolic Process (GO:0006665)	1/79	1.27	0.747753	0.799259	0.7296	0.2121	ENPP2
Positive Regulation of Growth (GO:0045927)	1/79	1.27	0.747753	0.799259	0.7296	0.2121	TGFB2
Regulation of mRNA Stability (GO:0043488)	1/80	1.25	0.752122	0.803434	0.7203	0.2052	MEIOC
Negative Regulation of DNA-templated Transcription (GO:0045892)	15/1006	1.49	0.755215	0.806045	0.8561	0.2403	PRNP;CSF2;EREG;NFKBIA;HEY1;NMNAT1;DDIT3;DNAJB4;TFEC;ID3;MAP3K10;TRIB3;CRYM;ATF3;ATF4
Negative Regulation of Gene Expression (GO:0010629)	5/364	1.37	0.755493	0.806045	0.7904	0.2216	TGFB2;CXCL8;ZC3H12A;CD34;HSPA1B
Regulation of Cytokinesis (GO:0032465)	1/81	1.23	0.756415	0.80636	0.7113	0.1986	CENPV
Regulation of Small GTPase Mediated Signal Transduction (GO:0051056)	2/157	1.27	0.756717	0.80636	0.7336	0.2045	SQSTM1;ARHGAP25
Protein Maturation (GO:0051604)	2/158	1.27	0.759818	0.809046	0.7288	0.2002	CASP1;CTSS
Response to Insulin (GO:0032868)	1/82	1.22	0.760634	0.809046	0.7025	0.1922	TRIB3
Inorganic Anion Transmembrane Transport (GO:0098661)	1/82	1.22	0.760634	0.809046	0.7025	0.1922	SLC12A8
Regulation of Cilium Assembly (GO:1902017)	1/83	1.2	0.76478	0.812462	0.6939	0.1861	TBC1D7
Protein Tetramerization (GO:0051262)	1/83	1.2	0.76478	0.812462	0.6939	0.1861	SOD2
Macromolecule Modification (GO:0043412)	1/84	1.19	0.768854	0.815295	0.6855	0.1802	CDKL3
Positive Regulation of Synaptic Transmission (GO:0050806)	1/84	1.19	0.768854	0.815295	0.6855	0.1802	SQSTM1
+ Reg of Transmembrane Receptor Prot Serine/Threonine Kinase Sgnlng Pway (GO:0090100)	1/84	1.19	0.768854	0.815295	0.6855	0.1802	TGFB2
Monoatomic Cation Transmembrane Transport (GO:0098655)	4/304	1.32	0.772212	0.818044	0.7568	0.1956	SLC6A6;ATP6V0B;ATP6V0A4;MCOLN2
Cell Morphogenesis Involved in Neuron Differentiation (GO:0048667)	1/85	1.18	0.772858	0.818044	0.6773	0.1745	NRCAM
Peptidyl-Lysine Modification (GO:0018205)	1/85	1.18	0.772858	0.818044	0.6773	0.1745	SIRT4
Regulation of Organelle Assembly (GO:1902115)	1/86	1.16	0.776793	0.821708	0.6693	0.169	C10ORF90
Inorganic Cation Transmembrane Transport (GO:0098662)	4/307	1.3	0.778729	0.823255	0.7492	0.1874	SLC6A6;ATP6V0B;ATP6V0A4;MCOLN2
Calcium Ion Transmembrane Transport (GO:0070588)	1/87	1.15	0.78066	0.823793	0.6615	0.1638	MCOLN2
Sodium Ion Transmembrane Transport (GO:0035725)	1/87	1.15	0.78066	0.823793	0.6615	0.1638	SLC6A6
Synapse Assembly (GO:0007416)	1/87	1.15	0.78066	0.823793	0.6615	0.1638	NRCAM
Nuclear-Transcribed mRNA Catabolic Process (GO:0000956)	1/89	1.12	0.788195	0.830735	0.6464	0.1538	ZC3H12A
Positive Regulation of Canonical Wnt Signaling Pathway (GO:0090263)	1/89	1.12	0.788195	0.830735	0.6464	0.1538	BAMBI
Regulation of Protein Localization to Plasma Membrane (GO:1903076)	1/90	1.11	0.791865	0.833592	0.6391	0.1491	SQSTM1
Protein Dephosphorylation (GO:0006470)	1/90	1.11	0.791865	0.833592	0.6391	0.1491	PTPRR
Brain Development (GO:0007420)	2/170	1.18	0.794438	0.835794	0.6764	0.1556	DDIT4;NRCAM
Heart Development (GO:0007507)	2/171	1.17	0.797114	0.837504	0.6723	0.1525	POPDC3;TGFB2
Protein Modification by Small Protein Conjugation (GO:0032446)	4/316	1.27	0.797399	0.837504	0.7272	0.1646	HERC5;C10ORF90;TRIM47;DTX2
Positive Regulation of Developmental Process (GO:0051094)	3/245	1.22	0.797508	0.837504	0.7037	0.1592	SLC6A6;TMEM79;ENPP2
RNA Splicing (GO:0008380)	1/92	1.09	0.799015	0.837569	0.625	0.1402	ZMAT5
Glucose Homeostasis (GO:0042593)	1/92	1.09	0.799015	0.837569	0.625	0.1402	IL6
Positive Regulation of Cell Adhesion (GO:0045785)	1/92	1.09	0.799015	0.837569	0.625	0.1402	TGFB2
Regulation of Cytokine Production (GO:0001817)	2/172	1.16	0.79976	0.837661	0.6683	0.1493	IL6;EREG
Ubiquitin-Dependent Protein Catabolic Process (GO:0006511)	6/455	1.32	0.800067	0.837661	0.7571	0.1689	HERC5;UCHL1;DDIT3;ZFAND2A;SQSTM1;FBXL22
Membrane Organization (GO:0061024)	2/173	1.16	0.802375	0.839571	0.6644	0.1463	SYNGR2;SYP
Cellular Response to Peptide Hormone Stimulus (GO:0071375)	1/94	1.06	0.805921	0.842268	0.6115	0.1319	TRIB3
Lipid Biosynthetic Process (GO:0008610)	1/94	1.06	0.805921	0.842268	0.6115	0.1319	PNLIPRP3
B Cell Activation (GO:0042113)	1/96	1.04	0.81259	0.847708	0.5985	0.1242	C3
Sodium Ion Transport (GO:0006814)	1/96	1.04	0.81259	0.847708	0.5985	0.1242	SLC6A6
Regulation of Actin Filament-Based Process (GO:0032970)	1/96	1.04	0.81259	0.847708	0.5985	0.1242	SLC48A1
Inorganic Cation Import Across Plasma Membrane (GO:0098659)	1/97	1.03	0.815839	0.850586	0.5923	0.1205	SLC12A8
Response to UV (GO:0009411)	1/100	1	0.825251	0.859884	0.5742	0.1103	ATF4
Cell Junction Assembly (GO:0034329)	1/101	0.99	0.82828	0.862523	0.5685	0.1071	NRCAM
Chemical Synaptic Transmission (GO:0007268)	3/260	1.15	0.829001	0.862756	0.6621	0.1242	NQO1;CHRNE;LIN7B
Phospholipase C-activating G Protein-Coupled Receptor Signaling Pathway (GO:0007200)	1/102	0.98	0.831258	0.86407	0.5628	0.104	GNA15
Positive Regulation of Protein Localization (GO:1903829)	1/102	0.98	0.831258	0.86407	0.5628	0.104	SESN2
Organic Anion Transport (GO:0015711)	1/105	0.95	0.839884	0.872515	0.5465	0.0954	CYB5R1
Axon Development (GO:0061564)	1/107	0.93	0.845389	0.877186	0.5361	0.09	NRCAM
Cell-Matrix Adhesion (GO:0007160)	1/107	0.93	0.845389	0.877186	0.5361	0.09	CD34
Cellular Response to Insulin Stimulus (GO:0032869)	1/108	0.93	0.84807	0.878395	0.5311	0.0875	TRIB3
Positive Regulation of DNA Metabolic Process (GO:0051054)	1/108	0.93	0.84807	0.878395	0.5311	0.0875	EREG
Positive Regulation of Translation (GO:0045727)	1/108	0.93	0.84807	0.878395	0.5311	0.0875	IL6
Regulation of Programmed Cell Death (GO:0043067)	2/195	1.03	0.852709	0.882673	0.588	0.0937	BEX2;BIRC3
Negative Regulation of Developmental Process (GO:0051093)	1/111	0.9	0.855839	0.884859	0.5165	0.0804	HEY1
Regulation of Cellular Response to Stress (GO:0080135)	1/111	0.9	0.855839	0.884859	0.5165	0.0804	NUPR1
Cellular Component Assembly (GO:0022607)	3/277	1.08	0.859537	0.888155	0.6205	0.0939	ZFYVE27;TRAF1;LIMD2
Protein Localization to Membrane (GO:0072657)	2/199	1.01	0.860501	0.888622	0.5759	0.0865	ZFYVE27;BID
Positive Regulation of Wnt Signaling Pathway (GO:0030177)	1/114	0.88	0.863212	0.890892	0.5027	0.0739	BAMBI
Regulation of Translation (GO:0006417)	2/201	1	0.864254	0.891438	0.5701	0.0832	IL6;HSPB1
Positive Regulation of Cell Projection Organization (GO:0031346)	1/115	0.87	0.865585	0.892282	0.4983	0.0719	CDKL3
Regulation of DNA Metabolic Process (GO:0051052)	1/116	0.86	0.867917	0.894155	0.4939	0.07	IL7R
Modulation of Chemical Synaptic Transmission (GO:0050804)	1/117	0.85	0.870209	0.895455	0.4897	0.0681	IL1B
Negative Regulation of Canonical Wnt Signaling Pathway (GO:0090090)	1/117	0.85	0.870209	0.895455	0.4897	0.0681	DDIT3
Neuron Projection Development (GO:0031175)	2/206	0.97	0.873236	0.898038	0.556	0.0754	IL6;ZFYVE27
Central Nervous System Development (GO:0007417)	3/288	1.04	0.876659	0.900155	0.5962	0.0785	C3;DDIT4;NRCAM
Modification-Dependent Protein Catabolic Process (GO:0019941)	2/208	0.96	0.876674	0.900155	0.5505	0.0725	HERC5;SQSTM1
Mitotic Sister Chromatid Segregation (GO:0000070)	1/120	0.83	0.876849	0.900155	0.4772	0.0627	AKAP8L
Negative Regulation of Defense Response (GO:0031348)	1/121	0.83	0.878986	0.901285	0.4732	0.061	TNFAIP6
Negative Regulation of Inflammatory Response (GO:0050728)	1/121	0.83	0.878986	0.901285	0.4732	0.061	TNFAIP6
Protein Ubiquitination (GO:0016567)	4/369	1.08	0.882977	0.904101	0.6199	0.0772	HERC5;C10ORF90;TRIM47;DTX2
Protein-Containing Complex Organization (GO:0043933)	1/123	0.81	0.88315	0.904101	0.4654	0.0578	TRAF1
Protein Stabilization (GO:0050821)	2/212	0.94	0.883293	0.904101	0.5399	0.067	C10ORF90;HSPA1B
Regulation of Mitotic Cell Cycle (GO:0007346)	1/124	0.81	0.885178	0.905497	0.4616	0.0563	ASNS
Regulation of Cell Motility (GO:2000145)	1/126	0.79	0.88913	0.908933	0.4542	0.0534	ENPP2
Regulation of Canonical Wnt Signaling Pathway (GO:0060828)	2/216	0.93	0.889582	0.908933	0.5297	0.062	BAMBI;DDIT3
RNA Biosynthetic Process (GO:0032774)	1/128	0.78	0.892945	0.911833	0.447	0.0506	NFKBIB
Neuron Projection Guidance (GO:0097485)	1/132	0.76	0.900189	0.91815	0.4333	0.0456	NRCAM
Protein Localization to Plasma Membrane (GO:0072659)	1/132	0.76	0.900189	0.91815	0.4333	0.0456	ZFYVE27
Regulation of RNA Biosynthetic Process (GO:2001141)	5/465	1.08	0.906182	0.923721	0.6137	0.0605	CXCL8;DDIT3;IL1B;ATF4;NFKB2
Protein Localization to Cell Periphery (GO:1990778)	1/136	0.74	0.906943	0.923955	0.4203	0.0411	ZFYVE27
Cilium Organization (GO:0044782)	2/230	0.87	0.909205	0.925716	0.4968	0.0473	TMEM17;IQCG
Regulation of Cytoskeleton Organization (GO:0051493)	1/139	0.72	0.911709	0.927722	0.4111	0.038	SLC48A1
Protein Autophosphorylation (GO:0046777)	1/140	0.71	0.913242	0.928739	0.4081	0.037	MAP3K10
Synapse Organization (GO:0050808)	1/144	0.69	0.919116	0.934166	0.3966	0.0335	NRCAM
Negative Regulation of Wnt Signaling Pathway (GO:0030178)	1/146	0.68	0.921902	0.93645	0.3911	0.0318	DDIT3
Axon Guidance (GO:0007411)	1/152	0.66	0.9297	0.943819	0.3755	0.0274	NRCAM
Adenylate Cyclase-Activating G Protein-Coupled Receptor Signaling Pathway (GO:0007189)	1/153	0.65	0.930922	0.944508	0.373	0.0267	ADM
Neuron Projection Morphogenesis (GO:0048812)	1/157	0.64	0.935601	0.948702	0.3634	0.0242	NRCAM
Regulation of Cellular Component Organization (GO:0051128)	1/159	0.63	0.937821	0.950398	0.3587	0.023	SLC48A1
Regulation of MAPK Cascade (GO:0043408)	2/260	0.77	0.940795	0.952856	0.4384	0.0268	IL6;IL1B
Protein Localization (GO:0008104)	3/371	0.81	0.95632	0.968016	0.4597	0.0205	ANGPT1;XIRP1;SQSTM1
Metal Ion Transport (GO:0030001)	1/180	0.56	0.956988	0.968129	0.3163	0.0139	SLC3A2
RNA Processing (GO:0006396)	2/291	0.69	0.962329	0.9727	0.3907	0.015	ZMAT5;AKAP8L
Small GTPase-mediated Signal Transduction (GO:0007264)	1/188	0.53	0.962626	0.9727	0.3026	0.0115	RRAD
Anterograde Trans-Synaptic Signaling (GO:0098916)	1/189	0.53	0.963276	0.972792	0.301	0.0113	CHRNE
Phosphorylation (GO:0016310)	2/298	0.67	0.966028	0.975004	0.3814	0.0132	DGKG;IRAK2
Nervous System Development (GO:0007399)	4/480	0.83	0.967541	0.975278	0.4726	0.0156	PRNP;NRCAM;CXCL1;CHAC1
DNA Metabolic Process (GO:0006259)	2/302	0.66	0.967983	0.975278	0.3762	0.0122	RRAD;FBXO6
DNA Repair (GO:0006281)	2/302	0.66	0.967983	0.975278	0.3762	0.0122	RRAD;FBXO6
Axonogenesis (GO:0007409)	1/200	0.5	0.969731	0.976394	0.2842	0.0087	NRCAM
Protein Transport (GO:0015031)	2/308	0.65	0.970713	0.976394	0.3687	0.011	NECAB3;TOM1
Adenylate Cyclase-Modulating G Protein-Coupled Receptor Signaling Pathway (GO:0007188)	1/202	0.5	0.970776	0.976394	0.2814	0.0083	ADM
Protein Polyubiquitination (GO:0000209)	1/228	0.44	0.981502	0.986611	0.2488	0.0046	C10ORF90
Translation (GO:0006412)	1/232	0.43	0.98276	0.987304	0.2444	0.0043	GARS1
Protein Modification Process (GO:0036211)	4/545	0.73	0.985633	0.989619	0.4144	0.006	CDKL3;PTPRR;IRAK2;GCNT2
Cilium Assembly (GO:0060271)	1/247	0.4	0.986762	0.99018	0.2294	0.0031	TMEM17
Protein Phosphorylation (GO:0006468)	2/373	0.54	0.989046	0.991899	0.3031	0.0033	IRAK2;MAP3K10
Gene Expression (GO:0010467)	2/381	0.52	0.990314	0.992598	0.2966	0.0029	CASP1;NFKBIB
Plasma Membrane Bounded Cell Projection Assembly (GO:0120031)	1/277	0.36	0.992199	0.993915	0.2041	0.0016	TMEM17
Regulation of DNA-templated Transcription (GO:0006355)	24/2139	1.12	0.993385	0.994529	0.62	0.0041	EGR1;BATF2;BRF2;CSF2;SOD2;EREG;NFKB2;MLLT11;IL6;HEY1;NMNAT1;BAMBI;DDIT3;IL1B;TNIP3;TFEC;ANKRD1;HMOX1;ID3;MAP3K10;TRIB3;TRIM16;ATF3;ATF4
Regulation of Transcription by RNA Polymerase II (GO:0006357)	25/2250	1.11	0.995232	0.995805	0.612	0.0029	BEX2;CSF3;AKAP8L;RELB;HEY1;DNAJB4;ZC3H12A;ANKRD1;HMOX1;CRYM;EGR1;BATF2;PRNP;SOD2;NFKB2;NFKBIA;IL6;DDIT3;TNIP3;TFEC;ID3;TRIB3;SQSTM1;ATF3;ATF4
Organelle Organization (GO:0006996)	2/437	0.46	0.995947	0.995947	0.2576	0.001	SIRT4;IQCG

## Sheet: KEGG_UP
KEGG 2026 | Upregulated DEGs | Sorted by Adjusted P-value | Bold = shown in figure
Top 20 sig. → orange | Other sig. → yellow | Bold = in figure (0) | Significant (adj.p<0.05): 37/244
Term	Overlap	Overlap (%)	P-value	Adjusted P-value	Odds Ratio	Combined Score	Genes
RHEUMATOID ARTHRITIS	17/92	18.48	3.12218e-13	7.61812e-11	13.5309	389.623	ATP6V0B;TGFB2;CXCL8;CSF2;ANGPT1;MMP1;CCL20;MMP3;CXCL1;CXCL3;CXCL2;CXCL5;ICAM1;IL6;IL1B;ATP6V0A4;ATP6V0D2
LEGIONELLOSIS	12/56	21.43	1.62134e-10	1.97803e-08	16.0614	362.066	C3;NFKBIA;IL6;CXCL8;IL1B;HSPA6;CASP1;CXCL1;CXCL3;CXCL2;HSPA1B;NFKB2
TNF SIGNALING PATHWAY	15/118	12.71	1.9105e-09	1.55387e-07	8.6284	173.223	CSF2;CCL20;MMP3;CXCL1;TRAF1;CXCL3;CXCL2;CXCL5;ICAM1;NFKBIA;IL6;IL1B;MAP3K14;ATF4;BIRC3
IL-17 SIGNALING PATHWAY	13/93	13.98	7.16917e-09	4.37319e-07	9.5811	179.68	CSF3;CXCL8;CSF2;MMP1;CCL20;MMP3;CXCL1;CXCL3;CXCL2;CXCL5;NFKBIA;IL6;IL1B
NF-KAPPA B SIGNALING PATHWAY	13/104	12.5	2.84956e-08	1.39059e-06	8.4182	146.255	CXCL8;GADD45B;CXCL1;TRAF1;CXCL3;CXCL2;ICAM1;NFKB2;RELB;NFKBIA;IL1B;MAP3K14;BIRC3
LIPID AND ATHEROSCLEROSIS	18/214	8.41	3.6429e-08	1.48145e-06	5.465	93.6038	CXCL8;NCF2;MMP1;HSPA6;MMP3;CXCL1;CXCL3;SOD2;CXCL2;ICAM1;NFKBIA;IL6;DDIT3;IL1B;CASP1;BID;HSPA1B;ATF4
AMOEBIASIS	12/100	12	1.54617e-07	5.3895e-06	8.0127	125.658	TGFB2;IL6;GNA15;CSF2;CXCL8;PRDX1;IL1B;AKR1C1;HSPB1;CXCL1;CXCL3;CXCL2
EPITHELIAL CELL SIGNALING IN HELICOBACTER PYLORI INFECTION	10/70	14.29	3.24439e-07	9.8954e-06	9.7488	145.658	NFKBIA;ATP6V0B;CXCL8;CXCL1;ATP6V0A4;CXCL3;CXCL2;ATP6V0D2;MAP3K14;HBEGF
FERROPTOSIS	8/41	19.51	4.20483e-07	1.13998e-05	14.1153	207.238	PRNP;MAP1LC3B2;HMOX1;ACSL5;SLC3A2;SLC7A11;GCLM;FTL
CYTOKINE-CYTOKINE RECEPTOR INTERACTION	18/296	6.08	4.28498e-06	0.000104553	3.8368	47.4241	IL32;CSF3;TGFB2;CSF2;CXCL8;CCL20;TNFRSF9;IL20RB;CXCL1;CXCL3;CXCL2;CXCL5;IL6;IL1B;TNFSF8;IL13RA2;IL7R;CCL26
MAPK SIGNALING PATHWAY	17/296	5.74	1.66539e-05	0.000369413	3.5994	39.6042	PTPRR;TGFB2;GADD45B;ANGPT1;HSPA6;PLA2G4C;HSPB1;PGF;EREG;RELB;NFKB2;DDIT3;IL1B;MAP3K10;MAP3K14;HSPA1B;ATF4
APOPTOSIS	11/136	8.09	2.45049e-05	0.000498266	5.1456	54.6293	NFKBIA;GADD45B;DDIT3;CTSW;TRAF1;BID;MAP3K14;TUBA4A;CTSS;ATF4;BIRC3
CORONAVIRUS DISEASE - COVID-19	14/230	6.09	4.93715e-05	0.000926665	3.8065	37.7453	CSF3;CSF2;CXCL8;C1S;MMP1;AKR1C1;MMP3;C3;NFKBIA;IL6;IL1B;CASP1;HBEGF;NFKBIB
VIRAL PROTEIN INTERACTION WITH CYTOKINE AND CYTOKINE RECEPTOR	9/99	9.09	5.39455e-05	0.000940193	5.8229	57.2249	IL6;CXCL8;CCL20;IL20RB;CXCL1;CXCL3;CXCL2;CXCL5;CCL26
NOD-LIKE RECEPTOR SIGNALING PATHWAY	12/185	6.49	9.28754e-05	0.00151077	4.0581	37.6766	NFKBIA;GABARAPL1;IL6;CXCL8;IL1B;CASP1;MAP1LC3B2;CXCL1;CXCL3;CXCL2;NFKBIB;BIRC3
ALCOHOLIC LIVER DISEASE	10/140	7.14	0.00016183	0.00246791	4.4834	39.135	C3;NFKBIA;IL6;CXCL8;IL1B;CXCL1;CPT1C;CXCL3;MAP3K14;CXCL2
MALARIA	6/50	12	0.000211413	0.0030344	7.8886	66.7507	CSF3;TGFB2;IL6;CXCL8;IL1B;ICAM1
PERTUSSIS	7/77	9.09	0.000365326	0.0049522	5.7944	45.8609	C3;IL6;CXCL8;C1S;IL1B;CASP1;CXCL5
CHAGAS DISEASE	8/103	7.77	0.000414419	0.00532201	4.8877	38.0686	C3;NFKBIA;TGFB2;IL6;GNA15;CXCL8;IL1B;SERPINE1
KAPOSI SARCOMA-ASSOCIATED HERPESVIRUS INFECTION	11/195	5.64	0.000597008	0.0072835	3.4851	25.872	C3;NFKBIA;IL6;CSF2;CXCL8;MAP1LC3B2;CXCL1;BID;CXCL3;CXCL2;ICAM1
INFLUENZA A	10/171	5.85	0.000795661	0.00883088	3.6144	25.7932	NFKBIA;IL6;CXCL8;IL1B;CASP1;PRSS3;BID;BCL2L2-PABPN1;ICAM1;NFKBIB
PRION DISEASE	13/268	4.85	0.000818674	0.00883088	2.979	21.174	EGR1;PRNP;NCF2;AKR1C1;HSPA6;ADRM1;TUBA4A;IL6;DDIT3;IL1B;PPIF;HSPA1B;ATF4
EPSTEIN-BARR VIRUS INFECTION	11/203	5.42	0.000832419	0.00883088	3.3385	23.6741	NFKBIA;IL6;GADD45B;ADRM1;BID;NFKBIE;MAP3K14;ICAM1;RELB;NFKB2;NFKBIB
TUBERCULOSIS	10/179	5.59	0.00112785	0.0114665	3.4418	23.3613	C3;TGFB2;IL6;ATP6V0B;IRAK2;IL1B;ATP6V0A4;BID;ATP6V0D2;CTSS
TRANSCRIPTIONAL MISREGULATION IN CANCER	10/189	5.29	0.00169426	0.0163001	3.2479	20.7232	IL6;CSF2;CXCL8;GADD45B;DDIT3;NFKBIZ;MMP3;NUPR1;TRAF1;BIRC3
AGE-RAGE SIGNALING PATHWAY IN DIABETIC COMPLICATIONS	7/100	7	0.00173689	0.0163001	4.3562	27.6868	EGR1;TGFB2;IL6;CXCL8;IL1B;SERPINE1;ICAM1
LEISHMANIASIS	6/76	7.89	0.00200038	0.0180775	4.952	30.7736	C3;NFKBIA;TGFB2;NCF2;IL1B;NFKBIB
C-TYPE LECTIN RECEPTOR SIGNALING PATHWAY	7/104	6.73	0.00217442	0.0189485	4.1757	25.6015	NFKBIA;IL6;IL1B;CASP1;MAP3K14;NFKB2;RELB
OSTEOCLAST DIFFERENTIATION	8/134	5.97	0.00229528	0.019312	3.6793	22.359	NFKBIA;TGFB2;NCF2;IL1B;SQSTM1;MAP3K14;NFKB2;RELB
TOXOPLASMOSIS	7/109	6.42	0.00283577	0.0230642	3.97	23.286	NFKBIA;TGFB2;HSPA6;PPIF;HSPA1B;NFKBIB;BIRC3
GLUTATHIONE METABOLISM	5/59	8.47	0.003466	0.0272808	5.338	30.2382	PRNP;GSTM3;GSR;CHAC1;GCLM
PHAGOSOME	8/151	5.3	0.00476103	0.0360499	3.2391	17.3205	C3;ATP6V0B;NCF2;ATP6V0A4;ATP6V0D2;TUBA4A;CTSS;DYNC1I1
HUMAN T-CELL LEUKEMIA VIRUS 1 INFECTION	10/219	4.57	0.0048756	0.0360499	2.7774	14.7855	NFKBIA;EGR1;TGFB2;IL6;CSF2;MAP3K14;ICAM1;ATF4;RELB;NFKB2
CHEMICAL CARCINOGENESIS - REACTIVE OXYGEN SPECIES	10/222	4.5	0.00535639	0.03844	2.7377	14.3166	NFKBIA;GSTM3;NQO1;NCF2;AKR1C1;AKR1C3;PPIF;HMOX1;SOD2;MAP3K14
CHEMOKINE SIGNALING PATHWAY	9/191	4.71	0.00606461	0.042279	2.8659	14.6314	NFKBIA;CXCL8;CCL20;CXCL1;CXCL3;CXCL2;CXCL5;NFKBIB;CCL26
HEMATOPOIETIC CELL LINEAGE	6/97	6.19	0.00669878	0.0454029	3.8051	19.0478	CSF3;IL6;CSF2;IL1B;IL7R;CD34
ADIPOCYTOKINE SIGNALING PATHWAY	5/70	7.14	0.00718899	0.0474085	4.4321	21.8735	NFKBIA;ACSL5;CPT1C;NFKBIE;NFKBIB
P53 SIGNALING PATHWAY	5/75	6.67	0.00956471	0.060281	4.1145	19.1311	CD82;GADD45B;SERPINE1;SESN2;BID
PATHWAYS IN CANCER	17/525	3.24	0.010073	0.060281	1.9535	8.982	GSTM3;NQO1;TGFB2;CXCL8;GADD45B;MMP1;TXNRD1;TRAF1;PGF;NFKB2;NFKBIA;IL6;HEY1;HMOX1;BID;IL7R;BIRC3
FLUID SHEAR STRESS AND ATHEROSCLEROSIS	7/138	5.07	0.0101292	0.060281	3.0866	14.1747	GSTM3;NQO1;NCF2;IL1B;HMOX1;SQSTM1;ICAM1
MEASLES	7/138	5.07	0.0101292	0.060281	3.0866	14.1747	NFKBIA;IL6;IL1B;HSPA6;BID;HSPA1B;NFKBIB
CYSTEINE AND METHIONINE METABOLISM	4/51	7.84	0.0115009	0.0668148	4.8937	21.8522	PRNP;PSAT1;SDSL;GCLM
CYTOSOLIC DNA-SENSING PATHWAY	5/82	6.1	0.0137252	0.0778823	3.7391	16.0353	NFKBIA;IL6;IL1B;CASP1;NFKBIB
COMPLEMENT AND COAGULATION CASCADES	5/87	5.75	0.0173479	0.0962022	3.5102	14.2314	C3;SERPINB2;C1S;AKR1C1;SERPINE1
CELLULAR SENESCENCE	7/156	4.49	0.0187797	0.101828	2.7112	10.777	TGFB2;IL6;CXCL8;GADD45B;RRAD;SERPINE1;SQSTM1
NECROPTOSIS	7/158	4.43	0.0199858	0.106011	2.675	10.4667	IL1B;PLA2G4C;CASP1;BID;SQSTM1;FTL;BIRC3
PATHOGENIC ESCHERICHIA COLI INFECTION	8/198	4.04	0.0219155	0.113774	2.432	9.2915	NFKBIA;IL6;CXCL8;IL1B;CASP1;CLDN1;TUBA4A;NFKBIB
SHIGELLOSIS	9/242	3.72	0.0250692	0.125188	2.2328	8.2302	C3;NFKBIA;CSF2;CXCL8;IL1B;CASP1;MAP1LC3B2;SQSTM1;NFKBIB
FOXO SIGNALING PATHWAY	6/130	4.62	0.0253522	0.125188	2.7878	10.2447	GABARAPL1;TGFB2;IL6;GADD45B;IL7R;SOD2
AFRICAN TRYPANOSOMIASIS	3/37	8.11	0.0256532	0.125188	5.0622	18.5432	IL6;IL1B;ICAM1
GLYCINE, SERINE AND THREONINE METABOLISM	3/38	7.89	0.0275054	0.131594	4.9173	17.6697	PSAT1;SDSL;PSPH
BLADDER CANCER	3/40	7.5	0.0314177	0.147422	4.651	16.0943	CXCL8;MMP1;HBEGF
SELENOCOMPOUND METABOLISM	2/17	11.76	0.0340179	0.156611	7.6346	25.8116	TXNRD1;SEPHS2
TH17 CELL DIFFERENTIATION	5/106	4.72	0.0366683	0.165686	2.8471	9.4121	NFKBIA;IL6;IL1B;NFKBIE;NFKBIB
HIF-1 SIGNALING PATHWAY	5/110	4.55	0.0419358	0.184702	2.7381	8.6842	IL6;ANGPT1;SERPINE1;HMOX1;TIMP1
PPAR SIGNALING PATHWAY	4/76	5.26	0.0423907	0.184702	3.1905	10.0845	MMP1;ACSL5;ANGPTL4;CPT1C
GLYCOSAMINOGLYCAN BIOSYNTHESIS - CHONDROITIN SULFATE / DERMATAN SULFATE	2/21	9.52	0.0502212	0.214681	6.0261	18.0259	CHPF2;B3GAT3
NON-ALCOHOLIC FATTY LIVER DISEASE	6/154	3.9	0.0510308	0.214681	2.3328	6.9409	IL6;CXCL8;DDIT3;IL1B;BID;ATF4
VIBRIO CHOLERAE INFECTION	3/49	6.12	0.052381	0.216626	3.7393	11.028	ATP6V0B;ATP6V0A4;ATP6V0D2
T CELL RECEPTOR SIGNALING PATHWAY	5/119	4.2	0.0553795	0.221518	2.5208	7.294	NFKBIA;CSF2;NFKBIE;MAP3K14;NFKBIB
NEUROTROPHIN SIGNALING PATHWAY	5/119	4.2	0.0553795	0.221518	2.5208	7.294	NFKBIA;IRAK2;NFKBIE;ATF4;NFKBIB
ETHER LIPID METABOLISM	3/51	5.88	0.0577599	0.227313	3.5832	10.2172	PLA2G4C;ENPP2;GDPD1
HEPATITIS B	6/161	3.73	0.0607226	0.235179	2.2267	6.2379	NFKBIA;TGFB2;IL6;CXCL8;BID;ATF4
SALMONELLA INFECTION	8/244	3.28	0.061716	0.235292	1.9533	5.4404	NFKBIA;IL6;CXCL8;IL1B;CASP1;DYNC1I1;TUBA4A;BIRC3
PATHWAYS OF NEURODEGENERATION - MULTIPLE DISEASES	13/469	2.77	0.0642228	0.241082	1.6486	4.5261	PRNP;ADRM1;MAP1LC3B2;TUBA4A;UCHL1;IL6;DDIT3;IL1B;PPIF;MAP3K10;BID;SQSTM1;ATF4
PD-L1 EXPRESSION AND PD-1 CHECKPOINT PATHWAY IN CANCER	4/88	4.55	0.0658515	0.243451	2.733	7.4347	NFKBIA;BATF2;NFKBIE;NFKBIB
HEPATOCELLULAR CARCINOMA	6/166	3.61	0.0682705	0.248607	2.1565	5.7887	GSTM3;NQO1;TGFB2;GADD45B;TXNRD1;HMOX1
JAK-STAT SIGNALING PATHWAY	6/167	3.59	0.0698426	0.248607	2.143	5.7037	CSF3;IL6;CSF2;IL20RB;IL13RA2;IL7R
GNRH SIGNALING PATHWAY	4/90	4.44	0.0703028	0.248607	2.6692	7.0865	EGR1;PLA2G4C;ATF4;HBEGF
SMALL CELL LUNG CANCER	4/92	4.35	0.0749047	0.261096	2.6082	6.7594	NFKBIA;GADD45B;TRAF1;BIRC3
PROTEIN PROCESSING IN ENDOPLASMIC RETICULUM	6/171	3.51	0.0763392	0.262349	2.0906	5.3783	DDIT3;HSPA4L;HSPA6;FBXO6;HSPA1B;ATF4
COLLECTING DUCT ACID SECRETION	2/27	7.41	0.0785133	0.263055	4.5784	11.6497	ATP6V0A4;ATP6V0D2
LYSOSOME	5/132	3.79	0.0787008	0.263055	2.2612	5.7483	ATP6V0B;ATP6V0A4;CTSW;ATP6V0D2;CTSS
VEGF SIGNALING PATHWAY	3/59	5.08	0.0817089	0.269418	3.07	7.6891	SH2D2A;PLA2G4C;HSPB1
LONGEVITY REGULATING PATHWAY - MULTIPLE SPECIES	3/60	5	0.0849617	0.276409	3.016	7.4361	HSPA6;SOD2;HSPA1B
YERSINIA INFECTION	5/138	3.62	0.0909911	0.292129	2.1586	5.174	NFKBIA;IL6;CXCL8;IL1B;CASP1
HERPES SIMPLEX VIRUS 1 INFECTION	6/181	3.31	0.0940229	0.29355	1.9702	4.6579	C3;NFKBIA;IL6;IL1B;BID;BIRC3
ARACHIDONIC ACID METABOLISM	3/63	4.76	0.0950429	0.29355	2.8648	6.742	PLA2G4C;AKR1C3;PTGR1
INFLAMMATORY BOWEL DISEASE	3/63	4.76	0.0950429	0.29355	2.8648	6.742	TGFB2;IL6;IL1B
MITOPHAGY - ANIMAL	4/101	3.96	0.0974159	0.294249	2.3651	5.5079	GABARAPL1;MAP1LC3B2;SQSTM1;ATF4
GLYCEROLIPID METABOLISM	3/64	4.69	0.0985075	0.294249	2.8177	6.5303	DGKG;PLPP5;PNLIPRP3
VITAMIN B6 METABOLISM	1/6	16.67	0.0991494	0.294249	11.4244	26.4033	PSAT1
PROTEIN DIGESTION AND ABSORPTION	4/102	3.92	0.100093	0.294249	2.3409	5.3879	COL27A1;SLC3A2;SLC1A5;PRSS3
VIRAL CARCINOGENESIS	6/185	3.24	0.101664	0.295308	1.9257	4.4024	C3;NFKBIA;TRAF1;ATP6V0D2;ATF4;NFKB2
MUCIN TYPE O-GLYCAN BIOSYNTHESIS	2/32	6.25	0.104986	0.297867	3.8144	8.5974	GCNT3;ST6GALNAC4
APOPTOSIS - MULTIPLE SPECIES	2/32	6.25	0.104986	0.297867	3.8144	8.5974	BID;BIRC3
TOLL-LIKE RECEPTOR SIGNALING PATHWAY	4/109	3.67	0.119758	0.335873	2.1841	4.6352	NFKBIA;IL6;CXCL8;IL1B
RIG-I-LIKE RECEPTOR SIGNALING PATHWAY	3/71	4.23	0.124113	0.34413	2.5267	5.2721	NFKBIA;CXCL8;NFKBIB
MTOR SIGNALING PATHWAY	5/154	3.25	0.128208	0.351493	1.9252	3.9545	CAB39L;SESN2;DDIT4;TBC1D7;SLC3A2
CELL ADHESION MOLECULE (CAM) INTERACTION	5/155	3.23	0.130737	0.354442	1.9123	3.8906	ICAM2;NRCAM;CLDN1;CD34;ICAM1
NICOTINATE AND NICOTINAMIDE METABOLISM	2/37	5.41	0.133452	0.357827	3.2686	6.5831	NMNAT1;SIRT4
CHRONIC MYELOID LEUKEMIA	3/76	3.95	0.143713	0.381151	2.353	4.5648	NFKBIA;TGFB2;GADD45B
ANTIGEN PROCESSING AND PRESENTATION	3/78	3.85	0.151824	0.394095	2.2901	4.3168	HSPA6;CTSS;HSPA1B
SYNAPTIC VESICLE CYCLE	3/78	3.85	0.151824	0.394095	2.2901	4.3168	ATP6V0B;ATP6V0A4;ATP6V0D2
GRAFT-VERSUS-HOST DISEASE	2/42	4.76	0.163398	0.415303	2.8593	5.1799	IL6;IL1B
FATTY ACID DEGRADATION	2/42	4.76	0.163398	0.415303	2.8593	5.1799	ACSL5;CPT1C
B CELL RECEPTOR SIGNALING PATHWAY	3/82	3.66	0.168462	0.42376	2.1737	3.8714	NFKBIA;NFKBIE;NFKBIB
PEROXISOME	3/83	3.61	0.172702	0.427684	2.1464	3.7695	PRDX1;ACSL5;SOD2
RELAXIN SIGNALING PATHWAY	4/126	3.17	0.173528	0.427684	1.8781	3.2893	NFKBIA;GNA15;MMP1;ATF4
ABC TRANSPORTERS	2/45	4.44	0.181889	0.438999	2.6594	4.5326	ABCB1;ABCC2
COLORECTAL CANCER	3/86	3.49	0.185598	0.438999	2.0685	3.4837	TGFB2;GADD45B;EREG
PORPHYRIN METABOLISM	2/46	4.35	0.18812	0.438999	2.5989	4.3418	HMOX1;FTL
UBIQUINONE AND OTHER TERPENOID-QUINONE BIOSYNTHESIS	1/12	8.33	0.188494	0.438999	5.1913	8.6627	NQO1
HUMAN CYTOMEGALOVIRUS INFECTION	6/223	2.69	0.188895	0.438999	1.5854	2.6422	NFKBIA;IL6;CXCL8;IL1B;BID;ATF4
LONGEVITY REGULATING PATHWAY	3/87	3.45	0.189953	0.438999	2.0438	3.3946	SESN2;SOD2;ATF4
NATURAL KILLER CELL MEDIATED CYTOTOXICITY	4/131	3.05	0.190713	0.438999	1.8037	2.9887	CSF2;ICAM2;BID;ICAM1
INTESTINAL IMMUNE NETWORK FOR IGA PRODUCTION	2/47	4.26	0.194381	0.443261	2.541	4.162	IL6;MAP3K14
ESTROGEN SIGNALING PATHWAY	4/135	2.96	0.204832	0.462768	1.7482	2.772	HSPA6;HSPA1B;ATF4;HBEGF
TH1 AND TH2 CELL DIFFERENTIATION	3/91	3.3	0.207618	0.464759	1.9505	3.0662	NFKBIA;NFKBIE;NFKBIB
OVARIAN STEROIDOGENESIS	2/51	3.92	0.219657	0.48724	2.3331	3.5362	PLA2G4C;AKR1C3
STAPHYLOCOCCUS AUREUS INFECTION	3/95	3.16	0.225633	0.495986	1.8653	2.7771	C3;C1S;ICAM1
GLYCOSPHINGOLIPID BIOSYNTHESIS - GANGLIO SERIES	1/15	6.67	0.229796	0.500626	4.0783	5.9974	ST6GALNAC4
GLYCEROPHOSPHOLIPID METABOLISM	3/102	2.94	0.257814	0.55214	1.7328	2.3488	DGKG;PLPP5;PLA2G4C
PROSTATE CANCER	3/103	2.91	0.262464	0.55214	1.7154	2.2945	NFKBIA;MMP3;ATF4
MINERAL ABSORPTION	2/58	3.45	0.264407	0.55214	2.0407	2.7147	HMOX1;FTL
SYSTEMIC LUPUS ERYTHEMATOSUS	3/104	2.88	0.267125	0.55214	1.6983	2.2418	C3;C1S;AKR1C1
COBALAMIN TRANSPORT AND METABOLISM	1/18	5.56	0.269001	0.55214	3.3581	4.4093	PRDX1
FATTY ACID BIOSYNTHESIS	1/18	5.56	0.269001	0.55214	3.3581	4.4093	ACSL5
PI3K-AKT SIGNALING PATHWAY	8/355	2.25	0.271008	0.55214	1.3209	1.7246	CSF3;IL6;ANGPT1;DDIT4;IL7R;PGF;EREG;ATF4
INTEGRIN SIGNALING	4/153	2.61	0.271544	0.55214	1.5356	2.0019	C3;ICAM2;PGF;ICAM1
INSULIN RESISTANCE	3/107	2.8	0.281162	0.564552	1.649	2.0923	NFKBIA;IL6;TRIB3
AMYOTROPHIC LATERAL SCLEROSIS	8/362	2.21	0.288343	0.564552	1.2943	1.6096	DDIT3;ADRM1;CASP1;MAP1LC3B2;BID;SQSTM1;TUBA4A;ATF4
NOTCH SIGNALING PATHWAY	2/62	3.23	0.290032	0.564552	1.9043	2.357	HEY1;DTX2
TGF-BETA SIGNALING PATHWAY	3/109	2.75	0.290558	0.564552	1.6178	1.9995	TGFB2;BAMBI;ID3
BIOSYNTHESIS OF VARIOUS NUCLEOTIDE SUGARS	1/20	5	0.294026	0.564552	3.0043	3.6775	CYB5R1
STEROID BIOSYNTHESIS	1/20	5	0.294026	0.564552	3.0043	3.6775	TM7SF2
NEUTROPHIL EXTRACELLULAR TRAP FORMATION	4/159	2.52	0.294603	0.564552	1.4757	1.8035	C3;NCF2;PPIF;CASP1
STEROID HORMONE BIOSYNTHESIS	2/63	3.17	0.296425	0.564552	1.873	2.2774	AKR1C1;AKR1C3
MICRORNAS IN CANCER	4/160	2.5	0.298472	0.564552	1.4662	1.7728	TGFB2;ABCB1;DDIT4;HMOX1
PARKINSON DISEASE	6/263	2.28	0.302106	0.566036	1.3359	1.599	UCHL1;DDIT3;ADRM1;PPIF;TUBA4A;ATF4
PARATHYROID HORMONE SYNTHESIS, SECRETION AND ACTION	3/112	2.68	0.304691	0.566036	1.573	1.8694	EGR1;ATF4;HBEGF
PANTOTHENATE AND COA BIOSYNTHESIS	1/21	4.76	0.306216	0.566036	2.8539	3.3775	VNN1
LEUKOCYTE TRANSENDOTHELIAL MIGRATION	3/116	2.59	0.323575	0.588883	1.517	1.7117	NCF2;CLDN1;ICAM1
AUTOPHAGY - ANIMAL	4/167	2.4	0.325702	0.588883	1.4027	1.5735	GABARAPL1;DDIT4;MAP1LC3B2;SQSTM1
FC EPSILON RI SIGNALING PATHWAY	2/68	2.94	0.32823	0.588883	1.7306	1.928	CSF2;PLA2G4C
VIRAL MYOCARDITIS	2/68	2.94	0.32823	0.588883	1.7306	1.928	BID;ICAM1
ALZHEIMER DISEASE	8/379	2.11	0.331487	0.590386	1.2339	1.3624	IL6;DDIT3;IL1B;ADRM1;PPIF;BID;TUBA4A;ATF4
GLYCOSAMINOGLYCAN BIOSYNTHESIS - HEPARAN SULFATE / HEPARIN	1/24	4.17	0.341542	0.603885	2.4813	2.6656	B3GAT3
THYROID HORMONE SYNTHESIS	2/71	2.82	0.347131	0.609353	1.6551	1.7512	GSR;ATF4
ALPHA-LINOLENIC ACID METABOLISM	1/26	3.85	0.36409	0.634557	2.2826	2.3062	PLA2G4C
FOLATE BIOSYNTHESIS	1/27	3.7	0.375074	0.649063	2.1947	2.1522	AKR1C3
METABOLISM OF XENOBIOTICS BY CYTOCHROME P450	2/76	2.63	0.378221	0.6499	1.5429	1.5001	GSTM3;AKR1C1
PANCREATIC CANCER	2/77	2.6	0.384367	0.653832	1.5223	1.4555	TGFB2;GADD45B
GLYCOSPHINGOLIPID BIOSYNTHESIS - LACTO AND NEOLACTO SERIES	1/28	3.57	0.385868	0.653832	2.1133	2.0124	GCNT2
FOLATE TRANSPORT AND METABOLISM	1/29	3.45	0.396477	0.667175	2.0377	1.8851	ABCC2
PENTOSE PHOSPHATE PATHWAY	1/30	3.33	0.406903	0.672626	1.9673	1.769	TALDO1
LINOLEIC ACID METABOLISM	1/30	3.33	0.406903	0.672626	1.9673	1.769	PLA2G4C
OXIDATIVE PHOSPHORYLATION	3/134	2.24	0.407986	0.672626	1.3074	1.1721	ATP6V0B;ATP6V0A4;ATP6V0D2
ERBB SIGNALING PATHWAY	2/83	2.41	0.420658	0.685798	1.4091	1.2202	EREG;HBEGF
APELIN SIGNALING PATHWAY	3/138	2.17	0.426385	0.685798	1.2684	1.0812	EGR1;SERPINE1;MAP1LC3B2
GALACTOSE METABOLISM	1/32	3.12	0.427219	0.685798	1.8402	1.565	GALM
AUTOPHAGY - OTHER	1/32	3.12	0.427219	0.685798	1.8402	1.565	GABARAPL1
SNARE INTERACTIONS IN VESICULAR TRANSPORT	1/33	3.03	0.437115	0.697098	1.7826	1.4752	VAMP1
BILE SECRETION	2/88	2.27	0.450049	0.707752	1.3268	1.0593	ABCC2;ABCB1
GASTRIC CANCER	3/146	2.05	0.462548	0.707752	1.1969	0.9228	TGFB2;ABCB1;GADD45B
BREAST CANCER	3/146	2.05	0.462548	0.707752	1.1969	0.9228	GADD45B;HEY1;NFKB2
DIABETIC CARDIOMYOPATHY	4/203	1.97	0.465222	0.707752	1.1468	0.8776	TGFB2;NCF2;GSR;PPIF
ALANINE, ASPARTATE AND GLUTAMATE METABOLISM	1/36	2.78	0.465792	0.707752	1.6296	1.245	ASNS
ONE CARBON POOL BY FOLATE	1/36	2.78	0.465792	0.707752	1.6296	1.245	ALDH1L2
THYROID CANCER	1/36	2.78	0.465792	0.707752	1.6296	1.245	GADD45B
PHOSPHOLIPASE D SIGNALING PATHWAY	3/147	2.04	0.467001	0.707752	1.1885	0.905	DGKG;CXCL8;PLA2G4C
PRIMARY IMMUNODEFICIENCY	1/38	2.63	0.484097	0.729133	1.5413	1.1182	IL7R
INFLAMMATORY MEDIATOR REGULATION OF TRP CHANNELS	2/97	2.06	0.500745	0.74404	1.2006	0.8304	IL1B;PLA2G4C
HIPPO SIGNALING PATHWAY	3/155	1.94	0.502004	0.74404	1.1255	0.7756	TGFB2;SERPINE1;BIRC3
CHOLINE METABOLISM IN CANCER	2/98	2.04	0.506191	0.74404	1.188	0.8088	DGKG;PLA2G4C
HYPERTROPHIC CARDIOMYOPATHY	2/98	2.04	0.506191	0.74404	1.188	0.8088	TGFB2;IL6
HEPATITIS C	3/158	1.9	0.514826	0.749109	1.1036	0.7327	NFKBIA;BID;CLDN1
TYPE I DIABETES MELLITUS	1/42	2.38	0.51885	0.749109	1.3907	0.9125	IL1B
TRYPTOPHAN METABOLISM	1/42	2.38	0.51885	0.749109	1.3907	0.9125	KYNU
VASOPRESSIN-REGULATED WATER REABSORPTION	1/43	2.33	0.527168	0.756641	1.3575	0.8691	DYNC1I1
GLUCAGON SIGNALING PATHWAY	2/104	1.92	0.538046	0.767737	1.1178	0.6928	CPT1C;ATF4
AMINOACYL-TRNA BIOSYNTHESIS	1/45	2.22	0.543375	0.770834	1.2957	0.7903	GARS1
PROTEASOME	1/46	2.17	0.551269	0.777512	1.2668	0.7544	ADRM1
VIRION - HEPATITIS VIRUSES	1/47	2.13	0.559027	0.783924	1.2392	0.7207	CLDN1
CYTOSKELETON IN MUSCLE CELLS	4/230	1.74	0.562905	0.78485	1.0084	0.5795	TMOD1;COL27A1;ANKRD1;XIRP1
COCAINE ADDICTION	1/48	2.08	0.566652	0.785586	1.2128	0.6889	ATF4
CHOLESTEROL METABOLISM	1/51	1.96	0.588746	0.811605	1.1398	0.6038	ANGPTL4
HUNTINGTON DISEASE	5/303	1.65	0.601692	0.824792	0.9552	0.4853	ADRM1;PPIF;MAP3K10;SOD2;TUBA4A
AMPK SIGNALING PATHWAY	2/121	1.65	0.62039	0.845671	0.9572	0.457	CAB39L;CPT1C
ENDOMETRIAL CANCER	1/58	1.72	0.636029	0.862173	0.9995	0.4523	GADD45B
LONG-TERM DEPRESSION	1/59	1.69	0.642326	0.865898	0.9822	0.4348	PLA2G4C
BASAL CELL CARCINOMA	1/62	1.61	0.660572	0.883764	0.9338	0.3872	GADD45B
VASCULAR SMOOTH MUSCLE CONTRACTION	2/131	1.53	0.663311	0.883764	0.8826	0.3623	PLA2G4C;ADM
CORTISOL SYNTHESIS AND SECRETION	1/63	1.59	0.666445	0.883764	0.9187	0.3728	ATF4
HUMAN PAPILLOMAVIRUS INFECTION	5/328	1.52	0.670751	0.88449	0.8802	0.3515	ATP6V0B;HEY1;ATP6V0A4;ATP6V0D2;OASL
GLYCOLYSIS / GLUCONEOGENESIS	1/65	1.54	0.677889	0.88449	0.8899	0.3459	GALM
LONG-TERM POTENTIATION	1/65	1.54	0.677889	0.88449	0.8899	0.3459	ATF4
RENAL CELL CARCINOMA	1/66	1.52	0.683464	0.88449	0.8761	0.3334	TGFB2
ACUTE MYELOID LEUKEMIA	1/67	1.49	0.688942	0.88449	0.8628	0.3215	CSF2
AMPHETAMINE ADDICTION	1/67	1.49	0.688942	0.88449	0.8628	0.3215	ATF4
CENTRAL CARBON METABOLISM IN CANCER	1/68	1.47	0.694326	0.88449	0.8499	0.31	SLC1A5
CHEMICAL CARCINOGENESIS - DNA ADDUCTS	1/69	1.45	0.699617	0.88449	0.8373	0.2991	GSTM3
DRUG METABOLISM - CYTOCHROME P450	1/69	1.45	0.699617	0.88449	0.8373	0.2991	GSTM3
SPINOCEREBELLAR ATAXIA	2/143	1.4	0.709573	0.885519	0.807	0.2769	ADRM1;PPIF
NON-SMALL CELL LUNG CANCER	1/71	1.41	0.709926	0.885519	0.8133	0.2786	GADD45B
SPLICEOSOME	2/144	1.39	0.713178	0.885519	0.8013	0.2708	HSPA6;HSPA1B
MELANOMA	1/72	1.39	0.714948	0.885519	0.8018	0.2691	GADD45B
ADRENERGIC SIGNALING IN CARDIOMYOCYTES	2/148	1.35	0.727227	0.89446	0.7791	0.2482	POPDC3;ATF4
GLIOMA	1/75	1.33	0.729498	0.89446	0.7692	0.2426	GADD45B
RIBOSOME BIOGENESIS IN EUKARYOTES	1/76	1.32	0.734182	0.895702	0.7589	0.2345	RPP25L
IGSF CAM SIGNALING	4/294	1.36	0.749405	0.898699	0.7833	0.226	ICAM2;NRCAM;TUBA4A;ICAM1
DRUG METABOLISM - OTHER ENZYMES	1/81	1.23	0.756415	0.898699	0.7113	0.1986	GSTM3
INSULIN SECRETION	1/81	1.23	0.756415	0.898699	0.7113	0.1986	ATF4
EFFEROCYTOSIS	2/157	1.27	0.756717	0.898699	0.7336	0.2045	CASP1;CPT1C
CELL CYCLE	2/157	1.27	0.756717	0.898699	0.7336	0.2045	TGFB2;GADD45B
THERMOGENESIS	3/229	1.31	0.758737	0.898699	0.7541	0.2082	COX19;ACSL5;CPT1C
RAS SIGNALING PATHWAY	3/231	1.3	0.763891	0.900432	0.7474	0.2013	ANGPT1;PLA2G4C;PGF
CGMP-PKG SIGNALING PATHWAY	2/161	1.24	0.768917	0.901999	0.715	0.1879	PPIF;ATF4
GAP JUNCTION	1/85	1.18	0.772858	0.902284	0.6773	0.1745	TUBA4A
GABAERGIC SYNAPSE	1/86	1.16	0.776793	0.90256	0.6693	0.169	GABARAPL1
TIGHT JUNCTION	2/169	1.18	0.79173	0.915304	0.6804	0.1589	CLDN1;TUBA4A
ALDOSTERONE SYNTHESIS AND SECRETION	1/92	1.09	0.799015	0.915304	0.625	0.1402	ATF4
ADHERENS JUNCTION	1/92	1.09	0.799015	0.915304	0.625	0.1402	RADIL
ENDOCYTOSIS	3/248	1.21	0.804169	0.916903	0.695	0.1515	ZFYVE27;HSPA6;HSPA1B
CALCIUM SIGNALING PATHWAY	3/250	1.2	0.808507	0.917562	0.6893	0.1465	GNA15;PPIF;MCOLN2
PHOSPHATIDYLINOSITOL SIGNALING SYSTEM	1/98	1.02	0.819031	0.920225	0.5861	0.117	DGKG
FC GAMMA R-MEDIATED PHAGOCYTOSIS	1/98	1.02	0.819031	0.920225	0.5861	0.117	PLA2G4C
PANCREATIC SECRETION	1/99	1.01	0.822168	0.920225	0.5801	0.1136	PRSS3
MRNA SURVEILLANCE PATHWAY	1/102	0.98	0.831258	0.924943	0.5628	0.104	BCL2L2-PABPN1
DILATED CARDIOMYOPATHY	1/103	0.97	0.834183	0.924943	0.5573	0.101	TGFB2
MOTOR PROTEINS	2/190	1.05	0.842413	0.924943	0.6038	0.1035	TUBA4A;DYNC1I1
CHEMICAL CARCINOGENESIS - RECEPTOR ACTIVATION	2/195	1.03	0.852709	0.924943	0.588	0.0937	GSTM3;ATF4
SEROTONERGIC SYNAPSE	1/111	0.9	0.855839	0.924943	0.5165	0.0804	PLA2G4C
CHOLINERGIC SYNAPSE	1/111	0.9	0.855839	0.924943	0.5165	0.0804	ATF4
PROTEOGLYCANS IN CANCER	2/197	1.02	0.856653	0.924943	0.5819	0.09	TGFB2;HBEGF
GLUTAMATERGIC SYNAPSE	1/112	0.89	0.85834	0.924943	0.5118	0.0782	PLA2G4C
FOCAL ADHESION	2/199	1.01	0.860501	0.924943	0.5759	0.0865	PGF;BIRC3
GROWTH HORMONE SYNTHESIS, SECRETION AND ACTION	1/118	0.85	0.872461	0.925084	0.4854	0.0662	ATF4
NEUROACTIVE LIGAND-RECEPTOR INTERACTION	4/366	1.09	0.879132	0.925084	0.6252	0.0805	C3;CHRNE;ADM;PRSS3
HUMAN IMMUNODEFICIENCY VIRUS 1 INFECTION	2/210	0.95	0.880025	0.925084	0.5452	0.0697	NFKBIA;BID
RAP1 SIGNALING PATHWAY	2/210	0.95	0.880025	0.925084	0.5452	0.0697	ANGPT1;PGF
SPHINGOLIPID SIGNALING PATHWAY	1/123	0.81	0.88315	0.925084	0.4654	0.0578	BID
CORNIFIED ENVELOPE FORMATION	2/214	0.93	0.886478	0.925084	0.5348	0.0644	TMEM79;CLDN1
PLATELET ACTIVATION	1/125	0.8	0.887171	0.925084	0.4579	0.0548	PLA2G4C
DOPAMINERGIC SYNAPSE	1/131	0.76	0.898425	0.928886	0.4366	0.0468	ATF4
CAMP SIGNALING PATHWAY	2/222	0.9	0.898431	0.928886	0.5151	0.0552	NFKBIA;POPDC3
SIGNALING PATHWAYS REGULATING PLURIPOTENCY OF STEM CELLS	1/141	0.71	0.914749	0.939328	0.4052	0.0361	ID3
UBIQUITIN MEDIATED PROTEOLYSIS	1/142	0.7	0.91623	0.939328	0.4023	0.0352	BIRC3
CUSHING SYNDROME	1/151	0.66	0.928456	0.94251	0.378	0.0281	ATF4
OXYTOCIN SIGNALING PATHWAY	1/152	0.66	0.9297	0.94251	0.3755	0.0274	PLA2G4C
ALCOHOLISM	1/153	0.65	0.930922	0.94251	0.373	0.0267	ATF4
WNT SIGNALING PATHWAY	1/170	0.59	0.948734	0.956575	0.3352	0.0176	BAMBI
HORMONE SIGNALING	1/218	0.46	0.977943	0.981502	0.2604	0.0058	GNA15
REGULATION OF ACTIN CYTOSKELETON	1/228	0.44	0.981502	0.981502	0.2488	0.0046	AKR1C1

## Sheet: MSigDB_Hallmark_UP
MSigDB Hallmark 2020 | Upregulated DEGs | Sorted by Adjusted P-value | Bold = shown in figure
Top 20 sig. → orange | Other sig. → yellow | Bold = in figure (4) | Significant (adj.p<0.05): 17/46
Term	Overlap	Overlap (%)	P-value	Adjusted P-value	Odds Ratio	Combined Score	Genes
TNF-alpha Signaling via NF-kB	31/200	15.5	9.30017e-21	4.27808e-19	11.3833	525.046	CSF2;TNFAIP6;SERPINE1;CXCL1;CXCL3;SAT1;CXCL2;ICAM1;RELB;KYNU;DNAJB4;ZC3H12A;JUNB;EGR1;SERPINB2;GADD45B;CCL20;TNFRSF9;TRAF1;SOD2;NFKB2;NFKBIA;YRDC;IL6;IL1B;NFKBIE;IL7R;SQSTM1;ATF3;HBEGF;BIRC3
mTORC1 Signaling	22/200	11	5.78046e-12	1.32951e-10	7.4528	192.854	TXNRD1;IFRD1;GSR;ASNS;GLRX;SLC7A11;SLC1A5;TUBA4A;TM7SF2;MLLT11;SLC6A6;PSAT1;DDIT3;PRDX1;CTH;DDIT4;TRIB3;NUPR1;SQSTM1;GLA;PSPH;NFKBIB
Apoptosis	19/161	11.8	4.83325e-11	7.41099e-10	8.0089	190.234	TGFB2;GADD45B;GSR;HSPB1;SOD2;SAT1;EREG;IL6;GNA15;DDIT3;IL1B;CTH;CASP1;HMOX1;TIMP1;BID;SQSTM1;ATF3;BIRC3
Reactive Oxygen Species Pathway	11/49	22.45	5.56979e-10	6.40526e-09	17.0018	362.283	NQO1;PRNP;SRXN1;PRDX1;TXNRD1;GSR;GLRX;SOD2;GCLM;JUNB;FTL
Inflammatory Response	19/200	9.5	2.0237e-09	1.86181e-08	6.2707	125.528	CSF3;CXCL8;CD82;TNFAIP6;CCL20;TNFRSF9;SERPINE1;ADRM1;ADM;ICAM1;EREG;NFKBIA;IL6;GNA15;IRAK2;IL1B;TIMP1;IL7R;HBEGF
KRAS Signaling Up	18/200	9	1.27181e-08	9.75051e-08	5.8896	107.075	PTPRR;ABCB1;CSF2;CAB39L;CCL20;ANXA10;GLRX;TRAF1;CTSS;MMP10;EREG;YRDC;IL1B;SPP1;ANGPTL4;IL7R;HBEGF;BIRC3
UV Response Up	16/158	10.13	1.55701e-08	1.02317e-07	6.6828	120.143	ABCB1;RRAD;ASNS;SOD2;CXCL2;TUBA4A;ICAM1;NFKBIA;CYB5R1;IL6;PPIF;HMOX1;BID;JUNB;SQSTM1;ATF3
p53 Pathway	17/200	8.5	7.51702e-08	4.32229e-07	5.5149	90.4631	TSPYL2;CD82;ABHD4;RRAD;HSPA4L;OSGIN1;SLC3A2;SLC7A11;SAT1;DDIT3;DDIT4;CASP1;HMOX1;TRIB3;NUPR1;ATF3;HBEGF
Xenobiotic Metabolism	16/200	8	4.16681e-07	2.1297e-06	5.1463	75.6039	NQO1;GABARAPL1;TGFB2;ABCC2;SERPINE1;GSR;AKR1C3;SLC1A5;PTGR1;SLC6A6;POR;VNN1;SERTAD1;KYNU;GCNT2;HMOX1
Hypoxia	13/200	6.5	4.67227e-05	0.000179104	4.0765	40.6477	SERPINE1;ADM;GLRX;PGF;SLC6A6;IL6;DDIT3;DDIT4;GCNT2;HMOX1;ANGPTL4;ATF3;TMEM45A
Complement	13/200	6.5	4.67227e-05	0.000179104	4.0765	40.6477	DGKG;SERPINB2;C1S;SERPINE1;TFPI2;CXCL1;CTSS;C3;IL6;KYNU;CASP1;TIMP1;PRSS3
Epithelial Mesenchymal Transition	13/200	6.5	4.67227e-05	0.000179104	4.0765	40.6477	IL32;CXCL8;GADD45B;PCOLCE2;MMP1;SERPINE1;TFPI2;MMP3;CXCL1;SAT1;IL6;SPP1;TIMP1
IL-2/STAT5 Signaling	12/199	6.03	0.000184652	0.000653383	3.7516	32.2527	PRNP;GABARAPL1;ABCB1;SYNGR2;CSF2;GADD45B;TNFRSF9;NFKBIZ;SPP1;GALM;SLC1A5;TRAF1
Coagulation	9/138	6.52	0.00066485	0.00218451	4.0544	29.6618	C3;SERPINB2;C1S;MMP1;SERPINE1;TFPI2;MMP3;TIMP1;MMP10
Unfolded Protein Response	8/113	7.08	0.000768949	0.00235811	4.42	31.6932	TSPYL2;PSAT1;DNAJA4;DDIT4;ASNS;CHAC1;ATF3;ATF4
IL-6/JAK/STAT3 Signaling	6/87	6.9	0.00394772	0.0113497	4.2771	23.6719	IL6;CSF2;IL1B;HMOX1;CXCL1;CXCL3
Interferon Gamma Response	9/200	4.5	0.00810389	0.0219282	2.7296	13.1442	NFKBIA;BATF2;IL6;TNFAIP6;C1S;CASP1;SOD2;ICAM1;OASL
Adipogenesis	8/200	4	0.0231045	0.0559372	2.4064	9.0667	C3;POR;ANGPT1;HSPB8;ENPP2;TALDO1;ANGPTL4;SLC1A5
Glycolysis	8/200	4	0.0231045	0.0559372	2.4064	9.0667	CHPF2;B3GAT3;CTH;DDIT4;SPAG4;TALDO1;GLRX;ANGPTL4
PI3K/AKT/mTOR Signaling	5/105	4.76	0.0354187	0.081463	2.8757	9.6064	CAB39L;DDIT3;TRIB3;SQSTM1;NFKBIB
Cholesterol Homeostasis	4/74	5.41	0.039031	0.0837736	3.2819	10.6447	FBXO6;TRIB3;ATF3;TM7SF2
Apical Surface	3/44	6.82	0.0400656	0.0837736	4.1964	13.5008	GSTM3;HSPB1;ATP6V0A4
Myogenesis	7/200	3.5	0.0589088	0.112909	2.0884	5.9138	NQO1;PRNP;SYNGR2;GADD45B;HSPB8;IFRD1;HBEGF
Allograft Rejection	7/200	3.5	0.0589088	0.112909	2.0884	5.9138	TGFB2;IL6;IL1B;TIMP1;CTSS;ICAM1;EREG
TGF-beta Signaling	3/54	5.56	0.0662952	0.121983	3.3719	9.15	SERPINE1;ID3;JUNB
Spermatogenesis	5/135	3.7	0.0847279	0.148314	2.2087	5.4518	GSTM3;HSPA4L;TALDO1;IL13RA2;OAZ3
Interferon Alpha Response	4/97	4.12	0.0870538	0.148314	2.4674	6.0234	BATF2;C1S;CASP1;OASL
Pperoxisome	4/104	3.85	0.105548	0.1734	2.2938	5.1579	ABCB1;PRDX1;ACSL5;SOD2
Hedgehog Signaling	2/36	5.56	0.127625	0.195692	3.3649	6.9273	HEY1;NRCAM
Angiogenesis	2/36	5.56	0.127625	0.195692	3.3649	6.9273	SPP1;TIMP1
Androgen Response	3/100	3	0.248548	0.367584	1.7687	2.4622	GSR;ADRM1;SAT1
Estrogen Response Late	5/200	2.5	0.263702	0.367584	1.4676	1.9562	HSPB8;HSPA4L;TFPI2;PPIF;GLA
heme Metabolism	5/200	2.5	0.263702	0.367584	1.4676	1.9562	C3;ASNS;SLC7A11;CLIC2;GCLM
Notch Signaling	1/32	3.12	0.427219	0.578002	1.8402	1.565	DTX2
Apical Junction	4/200	2	0.453865	0.596508	1.1646	0.92	ICAM2;TRAF1;CD34;ICAM1
Fatty Acid Metabolism	3/158	1.9	0.514826	0.645057	1.1036	0.7327	GABARAPL1;VNN1;ACSL5
Wnt-beta Catenin Signaling	1/42	2.38	0.51885	0.645057	1.3907	0.9125	HEY1
Bile Acid Metabolism	2/112	1.79	0.57827	0.700011	1.036	0.5675	ACSL5;GCLM
Estrogen Response Early	3/200	1.5	0.673557	0.794452	0.8664	0.3424	HSPB8;PPIF;GLA
DNA Repair	2/150	1.33	0.73403	0.844135	0.7685	0.2376	BRF2;ADRM1
Protein Secretion	1/96	1.04	0.81259	0.911687	0.5985	0.1242	GLA
Oxidative Phosphorylation	2/200	1	0.862389	0.922556	0.573	0.0848	POR;ATP6V0B
KRAS Signaling Dn	2/200	1	0.862389	0.922556	0.573	0.0848	TGFB2;SERPINB2
UV Response Dn	1/144	0.69	0.919116	0.960894	0.3966	0.0335	SERPINE1
Mitotic Spindle	1/199	0.5	0.969194	0.969731	0.2857	0.0089	TUBA4A
Myc Targets V1	1/200	0.5	0.969731	0.969731	0.2842	0.0087	IFRD1

## Sheet: Panther_UP
PANTHER 2016 | Upregulated DEGs | Sorted by Adjusted P-value | Bold = shown in figure
Top 20 sig. → orange | Other sig. → yellow | Bold = in figure (0) | Significant (adj.p<0.05): 3/52
Term	Overlap	Overlap (%)	P-value	Adjusted P-value	Odds Ratio	Combined Score	Genes
Plasminogen activating cascade Homo sapiens P00050	4/15	26.67	0.000102183	0.00369705	20.948	192.486	SERPINB2;MMP1;SERPINE1;MMP3
CCKR signaling map ST Homo sapiens P06959	11/165	6.67	0.000142194	0.00369705	4.1704	36.9431	NFKBIA;CXCL8;SERPINB2;SERPINE1;MMP3;HSPB1;CXCL1;MAP3K14;CXCL2;BIRC3;HBEGF
Apoptosis signaling pathway Homo sapiens P00006	8/102	7.84	0.00038795	0.00672447	4.94	38.8016	NFKBIA;HSPA6;MAP3K14;ATF3;ATF4;NFKB2;BIRC3;RELB
Serine glycine biosynthesis Homo sapiens P02776	2/6	33.33	0.00425097	0.0552627	28.6458	156.423	PSAT1;PSPH
Inflammation mediated by chemokine and cytokine signaling pathway Homo sapiens P00031	7/188	3.72	0.0449638	0.439528	2.2282	6.9117	GNA15;CXCL8;CCL20;JUNB;NFKB2;RELB;CCL26
Toll receptor signaling pathway Homo sapiens P00054	3/49	6.12	0.052381	0.439528	3.7393	11.028	NFKBIA;NFKBIE;NFKB2
Synaptic vesicle trafficking Homo sapiens P05734	2/23	8.7	0.0591672	0.439528	5.4516	15.4138	VAMP1;SYP
Asparagine and aspartate biosynthesis Homo sapiens P02730	1/5	20	0.083333	0.541665	14.2812	35.4876	ASNS
2-arachidonoylglycerol biosynthesis Homo sapiens P05726	1/6	16.67	0.0991494	0.545926	11.4244	26.4033	LIPH
p38 MAPK pathway Homo sapiens P05918	2/32	6.25	0.104986	0.545926	3.8144	8.5974	HSPB1;MAP3K10
p53 pathway Homo sapiens P00059	3/71	4.23	0.124113	0.557352	2.5267	5.2721	CD82;GADD45B;SERPINE1
Pentose phosphate pathway Homo sapiens P02762	1/8	12.5	0.129971	0.557352	8.1595	16.649	TALDO1
Blood coagulation Homo sapiens P00011	2/38	5.26	0.139338	0.557352	3.1777	6.2627	SERPINB2;SERPINE1
Beta3 adrenergic receptor signaling pathway Homo sapiens P04379	1/11	9.09	0.174242	0.574358	5.7108	9.9785	VAMP1
Interleukin signaling pathway Homo sapiens P00036	3/86	3.49	0.185598	0.574358	2.0685	3.4837	IL6;CXCL8;IL13RA2
TGF-beta signaling pathway Homo sapiens P00052	3/88	3.41	0.194333	0.574358	2.0196	3.3085	TGFB2;BAMBI;JUNB
Angiogenesis Homo sapiens P00005	4/142	2.82	0.230229	0.574358	1.659	2.4365	ANGPT1;SH2D2A;PLA2G4C;HSPB1
VEGF signaling pathway Homo sapiens P00056	2/54	3.7	0.238788	0.574358	2.1981	3.1481	SH2D2A;HSPB1
5HT3 type receptor mediated signaling pathway Homo sapiens P04375	1/16	6.25	0.243092	0.574358	3.8062	5.3832	VAMP1
5HT4 type receptor mediated signaling pathway Homo sapiens P04376	1/16	6.25	0.243092	0.574358	3.8062	5.3832	VAMP1
B cell activation Homo sapiens P00010	2/57	3.51	0.257997	0.574358	2.0779	2.8152	NFKBIA;NFKB2
Opioid prodynorphin pathway Homo sapiens P05916	1/18	5.56	0.269001	0.574358	3.3581	4.4093	VAMP1
Opioid proenkephalin pathway Homo sapiens P05915	1/18	5.56	0.269001	0.574358	3.3581	4.4093	VAMP1
Opioid proopiomelanocortin pathway Homo sapiens P05917	1/18	5.56	0.269001	0.574358	3.3581	4.4093	VAMP1
Nicotinic acetylcholine receptor signaling pathway Homo sapiens P00044	2/68	2.94	0.32823	0.574358	1.7306	1.928	CHRNE;VAMP1
Metabotropic glutamate receptor group I pathway Homo sapiens P00041	1/23	4.35	0.32997	0.574358	2.5942	2.8763	GNA15
Alpha adrenergic receptor signaling pathway Homo sapiens P00002	1/23	4.35	0.32997	0.574358	2.5942	2.8763	VAMP1
Oxidative stress response Homo sapiens P00046	1/24	4.17	0.341542	0.574358	2.4813	2.6656	DDIT3
Adrenaline and noradrenaline biosynthesis Homo sapiens P00001	1/25	4	0.352914	0.574358	2.3778	2.4765	VAMP1
T cell activation Homo sapiens P00053	2/73	2.74	0.359635	0.574358	1.6083	1.6448	NFKBIA;NFKB2
Beta2 adrenergic receptor signaling pathway Homo sapiens P04378	1/28	3.57	0.385868	0.574358	2.1133	2.0124	VAMP1
Beta1 adrenergic receptor signaling pathway Homo sapiens P04377	1/28	3.57	0.385868	0.574358	2.1133	2.0124	VAMP1
General transcription regulation Homo sapiens P00023	1/28	3.57	0.385868	0.574358	2.1133	2.0124	BRF2
5HT1 type receptor mediated signaling pathway Homo sapiens P04373	1/29	3.45	0.396477	0.574358	2.0377	1.8851	VAMP1
Metabotropic glutamate receptor group II pathway Homo sapiens P00040	1/30	3.33	0.406903	0.574358	1.9673	1.769	VAMP1
Cortocotropin releasing factor receptor signaling pathway Homo sapiens P04380	1/30	3.33	0.406903	0.574358	1.9673	1.769	VAMP1
Parkinson disease Homo sapiens P00049	2/81	2.47	0.408678	0.574358	1.4449	1.2929	UCHL1;HSPA6
Notch signaling pathway Homo sapiens P00045	1/38	2.63	0.484097	0.640917	1.5413	1.1182	HEY1
Muscarinic acetylcholine receptor 2 and 4 signaling pathway Homo sapiens P00043	1/39	2.56	0.493013	0.640917	1.5007	1.0613	VAMP1
Oxytocin receptor mediated signaling pathway Homo sapiens P04391	1/39	2.56	0.493013	0.640917	1.5007	1.0613	VAMP1
Thyrotropin-releasing hormone receptor signaling pathway Homo sapiens P04394	1/41	2.44	0.510387	0.642386	1.4255	0.9588	VAMP1
Muscarinic acetylcholine receptor 1 and 3 signaling pathway Homo sapiens P00042	1/42	2.38	0.51885	0.642386	1.3907	0.9125	VAMP1
Ionotropic glutamate receptor pathway Homo sapiens P00037	1/45	2.22	0.543375	0.651145	1.2957	0.7903	VAMP1
5HT2 type receptor mediated signaling pathway Homo sapiens P04374	1/46	2.17	0.551269	0.651145	1.2668	0.7544	VAMP1
EGF receptor signaling pathway Homo sapiens P00018	2/109	1.83	0.563491	0.651145	1.0653	0.611	EREG;HBEGF
Dopamine receptor mediated signaling pathway Homo sapiens P05912	1/52	1.92	0.595859	0.673579	1.1174	0.5785	VAMP1
Metabotropic glutamate receptor group III pathway Homo sapiens P00039	1/54	1.85	0.609717	0.674581	1.0751	0.5319	VAMP1
Huntington disease Homo sapiens P00029	2/124	1.61	0.633692	0.6865	0.9336	0.4259	MAP3K10;DYNC1I1
Alzheimer disease-presenilin pathway Homo sapiens P00004	1/99	1.01	0.822168	0.872505	0.5801	0.1136	MMP1
Heterotrimeric G-protein signaling pathway-Gq alpha and Go alpha mediated pathway Homo sapiens P00027	1/106	0.94	0.84266	0.876367	0.5413	0.0927	GNA15
Integrin signalling pathway Homo sapiens P00034	1/156	0.64	0.934462	0.952785	0.3657	0.0248	COL27A1
Wnt signaling pathway Homo sapiens P00057	1/278	0.36	0.992335	0.992335	0.2034	0.0016	GNA15

## Sheet: Reactome_UP
Reactome Pathways 2024 | Upregulated DEGs | Sorted by Adjusted P-value | Bold = shown in figure
Top 20 sig. → orange | Other sig. → yellow | Bold = in figure (4) | Significant (adj.p<0.05): 20/756
Term	Overlap	Overlap (%)	P-value	Adjusted P-value	Odds Ratio	Combined Score	Genes
NFE2L2 Regulating Anti-Oxidant Detoxification Enzymes	9/19	47.37	9.67075e-12	7.31108e-09	52.6205	1334.56	NQO1;SRXN1;TXNRD1;PRDX1;GSR;HMOX1;SLC7A11;GCLM;ATF4
Signaling by Interleukins	27/452	5.97	2.42169e-08	6.03007e-06	3.8417	67.3694	CSF3;CXCL8;IL20RB;CXCL1;CXCL2;ICAM1;IRAK2;CASP1;HMOX1;TIMP1;IL13RA2;JUNB;IL32;SERPINB2;CCL20;MMP1;MMP3;ADRM1;TALDO1;SOD2;NFKB2;NFKBIA;IL6;IL1B;IL7R;SQSTM1;NFKBIB
Cytokine Signaling in Immune System	37/776	4.77	2.45746e-08	6.03007e-06	3.0749	53.8776	CSF3;CXCL8;IL20RB;CXCL1;CXCL2;ICAM1;RELB;OASL;HERC5;IRAK2;CASP1;HMOX1;TIMP1;IL13RA2;JUNB;IL32;EGR1;SERPINB2;CCL20;MMP1;TNFRSF9;MMP3;ADRM1;TALDO1;SOD2;TUBA4A;NFKB2;NFKBIA;IL6;IL1B;TNFSF8;IL7R;SQSTM1;MAP3K14;HSPA1B;NFKBIB;BIRC3
Nuclear Events Mediated by NFE2L2	12/87	13.79	3.19051e-08	6.03007e-06	9.4078	162.383	NQO1;SRXN1;PRDX1;TXNRD1;ADRM1;GSR;TALDO1;HMOX1;SLC7A11;GCLM;SQSTM1;ATF4
Interleukin-10 Signaling	9/46	19.57	7.65211e-08	1.157e-05	14.2022	232.713	CSF3;IL6;CXCL8;CCL20;IL1B;CXCL1;TIMP1;CXCL2;ICAM1
Response of EIF2AK1 (HRI) to Heme Deficiency	6/15	40	1.10731e-07	1.3952e-05	38.6352	618.788	DDIT3;ASNS;TRIB3;CHAC1;ATF3;ATF4
KEAP1-NFE2L2 Pathway	13/119	10.92	1.44229e-07	1.55767e-05	7.2214	113.751	NQO1;SRXN1;TXNRD1;ADRM1;GSR;TALDO1;SLC7A11;PRDX1;SESN2;HMOX1;GCLM;SQSTM1;ATF4
Cellular Response to Chemical Stress	15/202	7.43	2.44371e-06	0.000214781	4.7321	61.1486	NQO1;SRXN1;NCF2;TXNRD1;GSR;ADRM1;TALDO1;SLC7A11;SOD2;PRDX1;SESN2;HMOX1;GCLM;SQSTM1;ATF4
Cellular Responses to Stress	33/787	4.19	2.55691e-06	0.000214781	2.6514	34.1411	CXCL8;SRXN1;NCF2;HSPB8;HSPA4L;SLC7A11;PRDX1;SESN2;HMOX1;CHAC1;DYNC1I1;TSPYL2;NQO1;ATP6V0B;HSPA7;TXNRD1;GSR;HSPA6;ADRM1;TALDO1;ASNS;SOD2;TUBA4A;IL6;DNAJA4;DDIT3;TRIB3;GCLM;ATP6V0D2;SQSTM1;ATF3;HSPA1B;ATF4
Cellular Responses to Stimuli	35/887	3.95	4.8346e-06	0.000365495	2.4917	30.4976	CXCL8;SRXN1;NCF2;HSPB8;HSPA4L;ADM;SLC7A11;PRDX1;SESN2;HMOX1;CHAC1;DYNC1I1;TSPYL2;NQO1;ATP6V0B;HSPA7;TXNRD1;GSR;HSPA6;ADRM1;TALDO1;ASNS;SOD2;TUBA4A;NFKBIA;IL6;DNAJA4;DDIT3;TRIB3;GCLM;ATP6V0D2;SQSTM1;ATF3;HSPA1B;ATF4
Interleukin-4 and Interleukin-13 Signaling	10/112	8.93	2.44131e-05	0.00167785	5.7223	60.7728	IL6;CXCL8;MMP1;IL1B;MMP3;HMOX1;TIMP1;IL13RA2;JUNB;ICAM1
Immune System	61/2150	2.84	6.44677e-05	0.00406147	1.8061	17.4278	CSF3;CXCL8;TNFAIP6;NCF2;ICAM2;CXCL1;CXCL2;CTSS;ICAM1;OASL;HERC5;TOM1;CASP1;FBXO6;TIMP1;PRSS3;IL13RA2;JUNB;CD34;UNKL;ATP6V0B;SERPINB2;MMP1;MMP3;TALDO1;TUBA4A;PLPP5;CRISPLD2;IL1B;TRIB3;ATP6V0D2;SQSTM1;FTL;BIRC3;C1S;IL20RB;FBXL22;RELB;C3;IRAK2;HMOX1;ATP6V0A4;DYNC1I1;IL32;EGR1;CCL20;TNFRSF9;HSPA6;ADRM1;SOD2;NFKB2;NFKBIA;IL6;VNN1;TNFSF8;IL7R;NFKBIE;MAP3K14;GLA;HSPA1B;NFKBIB
Cell Recruitment (Pro-Inflammatory Response)	5/27	18.52	8.76437e-05	0.00473276	13.1237	122.604	C3;IL1B;CASP1;HMOX1;NFKB2
Purinergic Signaling in Leishmaniasis Infection	5/27	18.52	8.76437e-05	0.00473276	13.1237	122.604	C3;IL1B;CASP1;HMOX1;NFKB2
ATF4 Activates Genes in Response to Endoplasmic Reticulum Stress	5/28	17.86	0.000105198	0.00530196	12.5524	114.976	CXCL8;DDIT3;ASNS;ATF3;ATF4
PERK Regulates Gene Expression	5/33	15.15	0.00023671	0.0111845	10.3083	86.0606	CXCL8;DDIT3;ASNS;ATF3;ATF4
Detoxification of Reactive Oxygen Species	5/36	13.89	0.000360414	0.0160278	9.3093	73.8065	NCF2;PRDX1;TXNRD1;GSR;SOD2
Interleukin-1 Processing	3/9	33.33	0.000395679	0.0166185	28.7266	225.07	IL1B;CASP1;NFKB2
Chemokine Receptors Bind Chemokines	6/57	10.53	0.000436369	0.0173629	6.8034	52.6381	CXCL8;CCL20;CXCL1;CXCL3;CXCL2;CXCL5
TNFR2 Non-Canonical NF-kB Pathway	7/88	7.95	0.000820828	0.0310273	5.0047	35.5592	TNFRSF9;ADRM1;TNFSF8;MAP3K14;BIRC3;RELB;NFKB2
Metabolism of Amino Acids and Derivatives	15/358	4.19	0.00148198	0.0533514	2.5592	16.6718	NQO1;TXNRD1;GSR;ADRM1;ASNS;SLC3A2;SDSL;SAT1;OAZ3;PSAT1;KYNU;CTH;CRYM;SEPHS2;PSPH
Interleukin-1 Signaling	7/102	6.86	0.00194615	0.0668768	4.2641	26.616	NFKBIA;IRAK2;IL1B;ADRM1;SQSTM1;NFKB2;NFKBIB
Activation of Matrix Metalloproteinases	4/33	12.12	0.00239868	0.0755585	7.9385	47.8918	MMP1;MMP3;TIMP1;MMP10
Amino Acid Transport Across the Plasma Membrane	4/33	12.12	0.00239868	0.0755585	7.9385	47.8918	SLC6A6;SLC3A2;SLC1A5;SLC7A11
RIP-mediated NFkB Activation via ZBP1	3/17	17.65	0.00289124	0.0840683	12.3064	71.944	NFKBIA;NFKB2;NFKBIB
The NLRP3 Inflammasome	3/17	17.65	0.00289124	0.0840683	12.3064	71.944	CASP1;HMOX1;NFKB2
Interleukin-1 Family Signaling	8/140	5.71	0.00301054	0.084295	3.511	20.3837	NFKBIA;IRAK2;IL1B;ADRM1;CASP1;SQSTM1;NFKB2;NFKBIB
ROS and RNS Production in Phagocytes	4/36	11.11	0.00331586	0.0895283	7.1932	41.0661	ATP6V0B;NCF2;ATP6V0A4;ATP6V0D2
Iron Uptake and Transport	5/59	8.47	0.003466	0.0903552	5.338	30.2382	ATP6V0B;HMOX1;ATP6V0A4;ATP6V0D2;FTL
CLEC7A (Dectin-1) Signaling	6/87	6.9	0.00394772	0.0976783	4.2771	23.6719	NFKBIA;IL1B;ADRM1;MAP3K14;RELB;NFKB2
Nucleotide-binding Domain, Leucine Rich Repeat Containing Receptor (NLR) Signaling Pathways	5/61	8.2	0.00400533	0.0976783	5.1468	28.411	IRAK2;CASP1;HMOX1;BIRC3;NFKB2
Uptake and Function of Diphtheria Toxin	2/6	33.33	0.00425097	0.100429	28.6458	156.423	TXNRD1;HBEGF
NGF-stimulated Transcription	4/39	10.26	0.00444657	0.101867	6.5756	35.6111	EGR1;RRAD;ID3;JUNB
ZBP1(DAI) Mediated Induction of Type I IFNs	3/21	14.29	0.00537399	0.119492	9.5697	50.0129	NFKBIA;NFKB2;NFKBIB
Regulation of IGF Transport and Uptake by Insulin-like Growth Factor Binding Proteins (IGFBPs)	7/124	5.65	0.00576185	0.122175	3.4584	17.8332	C3;IL6;MMP1;TMEM132A;SPP1;TIMP1;AFP
IkBA Variant Leads to EDA-ID	2/7	28.57	0.00588371	0.122175	22.9155	117.684	NFKBIA;NFKB2
Unfolded Protein Response (UPR)	6/95	6.32	0.00606178	0.122175	3.891	19.8666	TSPYL2;CXCL8;DDIT3;ASNS;ATF3;ATF4
Extracellular Matrix Organization	12/300	4	0.0061411	0.122175	2.4233	12.3413	TGFB2;COL27A1;PCOLCE2;MMP1;SERPINE1;MMP3;ICAM2;SPP1;TIMP1;CTSS;MMP10;ICAM1
Cellular Response to Starvation	8/161	4.97	0.00694902	0.134704	3.0259	15.0359	ATP6V0B;DDIT3;SESN2;ASNS;TRIB3;ATP6V0D2;ATF3;ATF4
TAK1-dependent IKK and NF-kappa-B Activation	4/45	8.89	0.00743071	0.134904	5.6116	27.5089	NFKBIA;IRAK2;NFKB2;NFKBIB
C-type Lectin Receptors (CLRs)	7/131	5.34	0.0077193	0.134904	3.262	15.8665	NFKBIA;IL1B;ADRM1;ICAM2;MAP3K14;NFKB2;RELB
Signaling by Overexpressed Wild-Type EGFR in Cancer	2/8	25	0.00775588	0.134904	19.0952	92.7896	EREG;HBEGF
Inhibition of Signaling by Overexpressed EGFR	2/8	25	0.00775588	0.134904	19.0952	92.7896	EREG;HBEGF
NIK-->noncanonical NF-kB Signaling	4/46	8.7	0.00802998	0.134904	5.4777	26.4277	ADRM1;MAP3K14;RELB;NFKB2
Metabolism of Polyamines	4/46	8.7	0.00802998	0.134904	5.4777	26.4277	NQO1;ADRM1;SAT1;OAZ3
Basigin Interactions	3/25	12	0.00883328	0.139124	7.8281	37.0211	MMP1;SLC3A2;SLC7A11
Inflammasomes	3/25	12	0.00883328	0.139124	7.8281	37.0211	CASP1;HMOX1;NFKB2
TRAF6 Mediated NF-kB Activation	3/25	12	0.00883328	0.139124	7.8281	37.0211	NFKBIA;NFKB2;NFKBIB
Innate Immune System	31/1149	2.7	0.009306	0.140214	1.6369	7.6561	TNFAIP6;C1S;NCF2;ICAM2;CXCL1;CTSS;RELB;HERC5;C3;IRAK2;TOM1;CASP1;HMOX1;ATP6V0A4;PRSS3;ATP6V0B;HSPA6;ADRM1;NFKB2;NFKBIA;PLPP5;VNN1;CRISPLD2;IL1B;ATP6V0D2;MAP3K14;GLA;HSPA1B;FTL;NFKBIB;BIRC3
Atorvastatin ADME	2/9	22.22	0.00985881	0.140214	16.3665	75.6033	ABCB1;ABCC2
EGFR Transactivation by Gastrin	2/9	22.22	0.00985881	0.140214	16.3665	75.6033	MMP3;HBEGF
EGFR Interacts With Phospholipase C-gamma	2/9	22.22	0.00985881	0.140214	16.3665	75.6033	EREG;HBEGF
Serine Biosynthesis	2/9	22.22	0.00985881	0.140214	16.3665	75.6033	PSAT1;PSPH
Dectin-1 Mediated Noncanonical NF-kB Signaling	4/49	8.16	0.0100153	0.140214	5.1118	23.5327	ADRM1;MAP3K14;RELB;NFKB2
Post-translational Protein Phosphorylation	6/107	5.61	0.0106292	0.146103	3.4266	15.5711	C3;IL6;TMEM132A;SPP1;TIMP1;AFP
ATF6 (ATF6-alpha) Activates Chaperone Genes	2/10	20	0.012184	0.158812	14.32	63.1172	DDIT3;ATF4
PI3K Events in ERBB4 Signaling	2/10	20	0.012184	0.158812	14.32	63.1172	EREG;HBEGF
Prednisone ADME	2/10	20	0.012184	0.158812	14.32	63.1172	ABCB1;AKR1C1
Activation of NF-kappaB in B Cells	4/54	7.41	0.013983	0.179172	4.5994	19.6391	NFKBIA;ADRM1;NFKBIE;NFKBIB
Insulin Receptor Recycling	3/30	10	0.0146375	0.181409	6.3769	26.9369	ATP6V0B;ATP6V0A4;ATP6V0D2
Interconversion of Nucleotide Di- and Triphosphates	3/30	10	0.0146375	0.181409	6.3769	26.9369	TXNRD1;GSR;GLRX
HSP90 Chaperone Cycle for Steroid Hormone Receptors (SHR) in the Presence of Ligand	4/56	7.14	0.0158125	0.192034	4.4221	18.3381	DNAJA4;TUBA4A;DYNC1I1;HSPA1B
Transferrin Endocytosis and Recycling	3/31	9.68	0.0160028	0.192034	6.1488	25.4253	ATP6V0B;ATP6V0A4;ATP6V0D2
TP53 Regulates Metabolic Genes	5/86	5.81	0.0165778	0.195825	3.5537	14.5692	PRDX1;TXNRD1;SESN2;DDIT4;GSR
ATF6 (ATF6-alpha) Activates Chaperones	2/12	16.67	0.0174685	0.200093	11.4548	46.3617	DDIT3;ATF4
SUMOylation of Immune Response Proteins	2/12	16.67	0.0174685	0.200093	11.4548	46.3617	NFKBIA;NFKB2
NF-kB Is Activated and Signals Survival	2/13	15.38	0.0204118	0.214324	10.4129	40.5234	NFKBIA;SQSTM1
Dissolution of Fibrin Clot	2/13	15.38	0.0204118	0.214324	10.4129	40.5234	SERPINB2;SERPINE1
ERBB2 Activates PTK6 Signaling	2/13	15.38	0.0204118	0.214324	10.4129	40.5234	EREG;HBEGF
GRB2 Events in EGFR Signaling	2/13	15.38	0.0204118	0.214324	10.4129	40.5234	EREG;HBEGF
Glutathione Synthesis and Recycling	2/13	15.38	0.0204118	0.214324	10.4129	40.5234	CHAC1;GCLM
Synthesis of Bile Acids and Bile Salts via 24-Hydroxycholesterol	2/13	15.38	0.0204118	0.214324	10.4129	40.5234	AKR1C1;AKR1C3
Nuclear Events (Kinase and Transcription Factor Activation)	4/61	6.56	0.0210213	0.2177	4.0331	15.5768	EGR1;RRAD;ID3;JUNB
SHC1 Events in EGFR Signaling	2/14	14.29	0.0235458	0.229849	9.5447	35.7813	EREG;HBEGF
SHC1 Events in ERBB4 Signaling	2/14	14.29	0.0235458	0.229849	9.5447	35.7813	EREG;HBEGF
Synthesis of Bile Acids and Bile Salts via 27-Hydroxycholesterol	2/14	14.29	0.0235458	0.229849	9.5447	35.7813	AKR1C1;AKR1C3
Tryptophan Catabolism	2/14	14.29	0.0235458	0.229849	9.5447	35.7813	KYNU;SLC3A2
Platelet Degranulation	6/128	4.69	0.0237145	0.229849	2.8337	10.6029	CYB5R1;TGFB2;SERPINE1;CTSW;TIMP1;TUBA4A
NOD1 2 Signaling Pathway	3/37	8.11	0.0256532	0.23651	5.0622	18.5432	IRAK2;CASP1;BIRC3
Gene and Protein Expression by JAK-STAT Signaling After Interleukin-12 Stimulation	3/37	8.11	0.0256532	0.23651	5.0622	18.5432	SERPINB2;TALDO1;SOD2
Glutathione Conjugation	3/37	8.11	0.0256532	0.23651	5.0622	18.5432	GSTM3;CHAC1;GCLM
HSF1-dependent Transactivation	3/37	8.11	0.0256532	0.23651	5.0622	18.5432	HSPB8;HSPA6;HSPA1B
ERBB2 Regulates Cell Motility	2/15	13.33	0.0268629	0.244679	8.81	31.866	EREG;HBEGF
Regulation of Ornithine Decarboxylase (ODC)	3/38	7.89	0.0275054	0.247549	4.9173	17.6697	NQO1;ADRM1;OAZ3
Response to Elevated Platelet Cytosolic Ca2+	6/133	4.51	0.0279472	0.248565	2.7215	9.7359	CYB5R1;TGFB2;SERPINE1;CTSW;TIMP1;TUBA4A
Downstream Signaling Events of B Cell Receptor (BCR)	4/68	5.88	0.0298999	0.254931	3.5907	12.6031	NFKBIA;ADRM1;NFKBIE;NFKBIB
p75NTR Signals via NF-kB	2/16	12.5	0.030356	0.254931	8.1803	28.5883	NFKBIA;SQSTM1
PI3K Events in ERBB2 Signaling	2/16	12.5	0.030356	0.254931	8.1803	28.5883	EREG;HBEGF
GRB2 Events in ERBB2 Signaling	2/16	12.5	0.030356	0.254931	8.1803	28.5883	EREG;HBEGF
Heme Degradation	2/16	12.5	0.030356	0.254931	8.1803	28.5883	ABCC2;HMOX1
Cellular Response to Heat Stress	5/101	4.95	0.0306861	0.254931	2.9962	10.4385	HSPA7;HSPB8;HSPA4L;HSPA6;HSPA1B
GAB1 Signalosome	2/17	11.76	0.0340179	0.276533	7.6346	25.8116	EREG;HBEGF
TNF Receptor Superfamily (TNFSF) Members Mediating Non-Canonical NF-kB Pathway	2/17	11.76	0.0340179	0.276533	7.6346	25.8116	MAP3K14;BIRC3
Degradation of the Extracellular Matrix	6/140	4.29	0.0346678	0.278817	2.5784	8.6684	MMP1;MMP3;SPP1;TIMP1;CTSS;MMP10
Response of EIF2AK4 (GCN2) to Amino Acid Deficiency	5/106	4.72	0.0366683	0.288763	2.8471	9.4121	DDIT3;ASNS;TRIB3;ATF3;ATF4
Toll Like Receptor 3 (TLR3) Cascade	5/106	4.72	0.0366683	0.288763	2.8471	9.4121	NFKBIA;IRAK2;NFKB2;NFKBIB;BIRC3
Mitochondrial Unfolded Protein Response (UPRmt)	2/18	11.11	0.037842	0.291924	7.1571	23.4346	SOD2;HSPA1B
Gastrin-CREB Signalling Pathway via PKC and MAPK	2/18	11.11	0.037842	0.291924	7.1571	23.4346	MMP3;HBEGF
Uptake and Actions of Bacterial Toxins	3/44	6.82	0.0400656	0.305956	4.1964	13.5008	TXNRD1;VAMP1;HBEGF
MyD88-independent TLR4 Cascade	5/110	4.55	0.0419358	0.313896	2.7381	8.6842	NFKBIA;IRAK2;NFKB2;NFKBIB;BIRC3
TRIF (TICAM1)-mediated TLR4 Signaling	5/110	4.55	0.0419358	0.313896	2.7381	8.6842	NFKBIA;IRAK2;NFKB2;NFKBIB;BIRC3
Interleukin-12 Signaling	3/46	6.52	0.0447944	0.332005	4.0008	12.4252	SERPINB2;TALDO1;SOD2
Vitamin B5 (Pantothenate) Metabolism	2/20	10	0.04595	0.332242	6.3612	19.5938	VNN1;ENPP2
Signaling by Receptor Tyrosine Kinases	15/536	2.8	0.0461327	0.332242	1.6693	5.1353	EGR1;ATP6V0B;COL27A1;RRAD;NCF2;SH2D2A;PGF;EREG;SPP1;ID3;TRIB3;ATP6V0A4;JUNB;ATP6V0D2;HBEGF
Metabolism	48/2181	2.2	0.0461447	0.332242	1.3276	4.0838	COX19;ABHD4;GDPD1;GLRX;SLC3A2;HSCB;SDSL;SAT1;ALDH1L2;OAZ3;TM7SF2;GNA15;LIPH;KYNU;ANKRD1;ENPP2;HMOX1;CHAC1;PRSS3;CRYM;SEPHS2;PSPH;RAB5IF;GSTM3;NQO1;ABCC2;CHPF2;B3GAT3;AKR1C1;TXNRD1;GSR;PLA2G4C;ADRM1;SIRT4;AKR1C3;TALDO1;ACSL5;ASNS;PTGR1;POR;VNN1;NMNAT1;PSAT1;CTH;TRIB3;ANGPTL4;GCLM;GLA
Transport of Small Molecules	19/724	2.62	0.0467751	0.333604	1.5666	4.7975	ATP6V0B;SLC13A3;ABCB1;ABCC2;ADRM1;SLC3A2;SLC7A11;SLC1A5;BEST3;MCOLN2;CYB5R1;SLC6A6;HMOX1;ATP6V0A4;ANGPTL4;CLIC2;ATP6V0D2;SLC28A3;FTL
CD209 (DC-SIGN) Signaling	2/21	9.52	0.0502212	0.351548	6.0261	18.0259	ICAM2;RELB
Digestion	2/21	9.52	0.0502212	0.351548	6.0261	18.0259	PIR;PNLIPRP3
Signaling by Insulin Receptor	4/82	4.88	0.0534178	0.362276	2.9441	8.6252	ATP6V0B;TRIB3;ATP6V0A4;ATP6V0D2
Neurodegenerative Diseases	2/22	9.09	0.0546289	0.362276	5.7245	16.6422	PRDX1;SOD2
Deregulated CDK5 Triggers Multiple Neurodegenerative Pathways in Alzheimer's Disease Models	2/22	9.09	0.0546289	0.362276	5.7245	16.6422	PRDX1;SOD2
SHC1 Events in ERBB2 Signaling	2/22	9.09	0.0546289	0.362276	5.7245	16.6422	EREG;HBEGF
Signaling by ERBB2 TMD JMD Mutants	2/22	9.09	0.0546289	0.362276	5.7245	16.6422	EREG;HBEGF
Insertion of Tail-Anchored Proteins Into the Endoplasmic Reticulum Membrane	2/22	9.09	0.0546289	0.362276	5.7245	16.6422	PRNP;HMOX1
Regulation of HSF1-mediated Heat Shock Response	4/83	4.82	0.0553931	0.36415	2.9067	8.41	HSPA7;HSPA4L;HSPA6;HSPA1B
Peptide Ligand-Binding Receptors	7/198	3.54	0.0564192	0.364555	2.1105	6.0675	C3;CXCL8;CCL20;CXCL1;CXCL3;CXCL2;CXCL5
Metabolism of Vitamins and Cofactors	7/198	3.54	0.0564192	0.364555	2.1105	6.0675	VNN1;NMNAT1;AKR1C1;AKR1C3;ENPP2;PRSS3;ALDH1L2
Synthesis of Bile Acids and Bile Salts via 7Alpha-Hydroxycholesterol	2/23	8.7	0.0591672	0.379071	5.4516	15.4138	AKR1C1;AKR1C3
DDX58 IFIH1-mediated Induction of Interferon-Alpha Beta	4/86	4.65	0.0615525	0.391039	2.7999	7.8059	HERC5;NFKBIA;NFKB2;NFKBIB
Other Interleukin Signaling	2/24	8.33	0.0638304	0.395539	5.2036	14.3177	IL32;CSF3
CD28 Dependent PI3K Akt Signaling	2/24	8.33	0.0638304	0.395539	5.2036	14.3177	TRIB3;MAP3K14
Estrogen-dependent Nuclear Events Downstream of ESR-membrane Signaling	2/24	8.33	0.0638304	0.395539	5.2036	14.3177	EREG;HBEGF
SARS-CoV-1 Activates Modulates Innate Immune Responses	3/54	5.56	0.0662952	0.407473	3.3719	9.15	NFKBIA;IRAK2;CASP1
Defective Intrinsic Pathway for Apoptosis	2/25	8	0.0686128	0.409075	4.9771	13.3349	PRDX1;SOD2
Signaling by EGFR in Cancer	2/25	8	0.0686128	0.409075	4.9771	13.3349	EREG;HBEGF
Signaling by ERBB2 KD Mutants	2/25	8	0.0686128	0.409075	4.9771	13.3349	EREG;HBEGF
Metabolism of Water-Soluble Vitamins and Cofactors	5/127	3.94	0.0691891	0.409075	2.3545	6.2887	VNN1;NMNAT1;ENPP2;PRSS3;ALDH1L2
Amino Acids Regulate mTORC1	3/55	5.45	0.0692614	0.409075	3.3068	8.8288	ATP6V0B;SESN2;ATP6V0D2
Collagen Formation	4/90	4.44	0.0703028	0.412007	2.6692	7.0865	COL27A1;PCOLCE2;MMP3;CTSS
Interleukin-12 Family Signaling	3/56	5.36	0.0722868	0.420376	3.2443	8.5231	SERPINB2;TALDO1;SOD2
Digestion and Absorption	2/26	7.69	0.0735088	0.421005	4.7694	12.4499	PIR;PNLIPRP3
Signaling by ERBB2 in Cancer	2/26	7.69	0.0735088	0.421005	4.7694	12.4499	EREG;HBEGF
Attenuation Phase	2/27	7.41	0.0785133	0.439011	4.5784	11.6497	HSPA6;HSPA1B
Pyroptosis	2/27	7.41	0.0785133	0.439011	4.5784	11.6497	IL1B;CASP1
Signaling by TGF-beta Receptor Complex	4/94	4.26	0.079655	0.439011	2.55	6.4517	TGFB2;BAMBI;SERPINE1;JUNB
Toll-like Receptor Cascades	6/174	3.45	0.0814291	0.439011	2.053	5.149	NFKBIA;IRAK2;CTSS;NFKB2;NFKBIB;BIRC3
Abacavir Transmembrane Transport	1/5	20	0.083333	0.439011	14.2812	35.4876	ABCB1
NFE2L2 Regulating ER-stress Associated Genes	1/5	20	0.083333	0.439011	14.2812	35.4876	ATF4
Alternative Complement Activation	1/5	20	0.083333	0.439011	14.2812	35.4876	C3
Regulation of HMOX1 Expression and Activity	1/5	20	0.083333	0.439011	14.2812	35.4876	HMOX1
Sodium-coupled Sulphate, Di- and Tri-Carboxylate Transporters	1/5	20	0.083333	0.439011	14.2812	35.4876	SLC13A3
The IPAF Inflammasome	1/5	20	0.083333	0.439011	14.2812	35.4876	CASP1
Threonine Catabolism	1/5	20	0.083333	0.439011	14.2812	35.4876	SDSL
Metabolism of Porphyrins	2/28	7.14	0.0836211	0.439011	4.4021	10.9237	ABCC2;HMOX1
Platelet Activation, Signaling and Aggregation	8/262	3.05	0.0850415	0.442689	1.8132	4.4689	DGKG;CYB5R1;TGFB2;GNA15;SERPINE1;CTSW;TIMP1;TUBA4A
Assembly of Collagen Fibrils and Other Multimeric Structures	3/61	4.92	0.088269	0.442689	2.9639	7.1944	COL27A1;MMP3;CTSS
Regulated Necrosis	3/61	4.92	0.088269	0.442689	2.9639	7.1944	IL1B;CASP1;BIRC3
Acyl Chain Remodelling of PE	2/29	6.9	0.088827	0.442689	4.2389	10.2625	ABHD4;PLA2G4C
Downregulation of ERBB2 Signaling	2/29	6.9	0.088827	0.442689	4.2389	10.2625	EREG;HBEGF
TNFs Bind Their Physiological Receptors	2/29	6.9	0.088827	0.442689	4.2389	10.2625	TNFRSF9;TNFSF8
MyD88 Cascade Initiated on Plasma Membrane	4/98	4.08	0.0895917	0.442689	2.441	5.8889	NFKBIA;IRAK2;NFKB2;NFKBIB
Toll Like Receptor 10 (TLR10) Cascade	4/98	4.08	0.0895917	0.442689	2.441	5.8889	NFKBIA;IRAK2;NFKB2;NFKBIB
Toll Like Receptor 5 (TLR5) Cascade	4/98	4.08	0.0895917	0.442689	2.441	5.8889	NFKBIA;IRAK2;NFKB2;NFKBIB
HSF1 Activation	2/30	6.67	0.0941262	0.458608	4.0873	9.6587	HSPA6;HSPA1B
Collagen Degradation	3/64	4.69	0.0985075	0.458608	2.8177	6.5303	MMP1;MMP3;MMP10
Cytosolic Sensors of Pathogen-Associated DNA	3/64	4.69	0.0985075	0.458608	2.8177	6.5303	NFKBIA;NFKB2;NFKBIB
Biosynthesis of Lipoxins (LX)	1/6	16.67	0.0991494	0.458608	11.4244	26.4033	PTGR1
CLEC7A Inflammasome Pathway	1/6	16.67	0.0991494	0.458608	11.4244	26.4033	IL1B
RUNX3 Regulates Immune Response and Cell Migration	1/6	16.67	0.0991494	0.458608	11.4244	26.4033	SPP1
GDP-fucose Biosynthesis	1/6	16.67	0.0991494	0.458608	11.4244	26.4033	FUOM
Toxicity of Botulinum Toxin Type D (botD)	1/6	16.67	0.0991494	0.458608	11.4244	26.4033	VAMP1
Toxicity of Botulinum Toxin Type F (botF)	1/6	16.67	0.0991494	0.458608	11.4244	26.4033	VAMP1
EGFR Downregulation	2/31	6.45	0.0995141	0.458608	3.9461	9.1055	EREG;HBEGF
Ion Channel Transport	6/184	3.26	0.0997235	0.458608	1.9367	4.4647	ATP6V0B;ATP6V0A4;CLIC2;BEST3;ATP6V0D2;MCOLN2
TRAF6 Mediated Induction of NFkB and MAP Kinases Upon TLR7 8 or 9 Activation	4/102	3.92	0.100093	0.458608	2.3409	5.3879	NFKBIA;IRAK2;NFKB2;NFKBIB
MyD88 Dependent Cascade Initiated on Endosome	4/103	3.88	0.102804	0.468191	2.3171	5.2713	NFKBIA;IRAK2;NFKB2;NFKBIB
Nuclear Signaling by ERBB4	2/32	6.25	0.104986	0.473817	3.8144	8.5974	EREG;HBEGF
Regulation of Expression and Function of Type II Classical Cadherins	2/33	6.06	0.110537	0.473817	3.6912	8.1294	ZC3H12A;ANGPTL4
Regulation of Homotypic Cell-Cell Adhesion	2/33	6.06	0.110537	0.473817	3.6912	8.1294	ZC3H12A;ANGPTL4
Synthesis of Bile Acids and Bile Salts	2/33	6.06	0.110537	0.473817	3.6912	8.1294	AKR1C1;AKR1C3
TNFR1-induced NF-kappa-B Signaling Pathway	2/33	6.06	0.110537	0.473817	3.6912	8.1294	TRAF1;BIRC3
Toll Like Receptor 4 (TLR4) Cascade	5/148	3.38	0.113523	0.473817	2.0066	4.3658	NFKBIA;IRAK2;NFKB2;NFKBIB;BIRC3
Toll Like Receptor 7 8 (TLR7 8) Cascade	4/107	3.74	0.113978	0.473817	2.2267	4.8358	NFKBIA;IRAK2;NFKB2;NFKBIB
Transport of Inorganic Cations Anions and Amino Acids Oligopeptides	4/107	3.74	0.113978	0.473817	2.2267	4.8358	SLC6A6;SLC3A2;SLC1A5;SLC7A11
Activation of C3 and C5	1/7	14.29	0.114694	0.473817	9.5199	20.6152	C3
Neurofascin Interactions	1/7	14.29	0.114694	0.473817	9.5199	20.6152	NRCAM
NrCAM Interactions	1/7	14.29	0.114694	0.473817	9.5199	20.6152	NRCAM
PTK6 Promotes HIF1A Stabilization	1/7	14.29	0.114694	0.473817	9.5199	20.6152	HBEGF
DEx H-box Helicases Activate Type I IFN and Inflammatory Cytokines Production	1/7	14.29	0.114694	0.473817	9.5199	20.6152	NFKB2
Regulation of CDH19 Expression and Function	1/7	14.29	0.114694	0.473817	9.5199	20.6152	ZC3H12A
Digestion of Dietary Lipid	1/7	14.29	0.114694	0.473817	9.5199	20.6152	PNLIPRP3
Glycerophospholipid Catabolism	1/7	14.29	0.114694	0.473817	9.5199	20.6152	GDPD1
Highly Sodium Permeable Postsynaptic Acetylcholine Nicotinic Receptors	1/7	14.29	0.114694	0.473817	9.5199	20.6152	CHRNE
Signaling by VEGF	4/108	3.7	0.116852	0.48011	2.2052	4.7342	NCF2;SH2D2A;TRIB3;PGF
Drug ADME	4/109	3.67	0.119758	0.489389	2.1841	4.6352	ABCB1;ABCC2;AKR1C1;SLC28A3
CD28 Co-Stimulation	2/35	5.71	0.121861	0.490036	3.4671	7.2978	TRIB3;MAP3K14
Diseases Associated With the TLR Signaling Cascade	2/35	5.71	0.121861	0.490036	3.4671	7.2978	NFKBIA;NFKB2
Diseases of Immune System	2/35	5.71	0.121861	0.490036	3.4671	7.2978	NFKBIA;NFKB2
Toll Like Receptor 9 (TLR9) Cascade	4/110	3.64	0.122695	0.490778	2.1633	4.5388	NFKBIA;IRAK2;NFKB2;NFKBIB
Neutrophil Degranulation	12/478	2.51	0.125922	0.493758	1.4839	3.0748	C3;VNN1;TNFAIP6;CRISPLD2;HSPA6;TOM1;CXCL1;PRSS3;GLA;CTSS;HSPA1B;FTL
SMAD2 SMAD3 SMAD4 Heterotrimer Regulates Transcription	2/36	5.56	0.127625	0.493758	3.3649	6.9273	SERPINE1;JUNB
SARS-CoV-1-host Interactions	4/112	3.57	0.128659	0.493758	2.1231	4.3535	NFKBIA;IRAK2;SERPINE1;CASP1
NFE2L2 Regulates Pentose Phosphate Pathway Genes	1/8	12.5	0.129971	0.493758	8.1595	16.649	TALDO1
Cross-presentation of Particulate Exogenous Antigens (Phagosomes)	1/8	12.5	0.129971	0.493758	8.1595	16.649	NCF2
Fatty Acids Bound to GPR40 (FFAR1) Regulate Insulin Secretion	1/8	12.5	0.129971	0.493758	8.1595	16.649	GNA15
TGFBR3 Regulates TGF-beta Signaling	1/8	12.5	0.129971	0.493758	8.1595	16.649	TGFB2
Metabolism of Ingested SeMet, Sec, MeSec Into H2Se	1/8	12.5	0.129971	0.493758	8.1595	16.649	CTH
VEGF Binds to VEGFR Leading to Receptor Dimerization	1/8	12.5	0.129971	0.493758	8.1595	16.649	PGF
VEGF Ligand-Receptor Interactions	1/8	12.5	0.129971	0.493758	8.1595	16.649	PGF
SARS-CoV-1 Infection	5/157	3.18	0.135861	0.513289	1.8869	3.7665	NFKBIA;IRAK2;SERPINE1;CASP1;ST6GALNAC4
MyD88 MAL(TIRAP) Cascade Initiated on Plasma Membrane	4/115	3.48	0.137828	0.513289	2.0654	4.093	NFKBIA;IRAK2;NFKB2;NFKBIB
Signaling by NTRK1 (TRKA)	4/115	3.48	0.137828	0.513289	2.0654	4.093	EGR1;RRAD;ID3;JUNB
Toll Like Receptor TLR6 TLR2 Cascade	4/115	3.48	0.137828	0.513289	2.0654	4.093	NFKBIA;IRAK2;NFKB2;NFKBIB
Extra-nuclear Estrogen Signaling	3/75	4	0.139713	0.517021	2.3858	4.6957	MMP3;EREG;HBEGF
PPARA Activates Gene Expression	4/117	3.42	0.144082	0.517021	2.0286	3.9301	TXNRD1;ANKRD1;TRIB3;ANGPTL4
Abacavir ADME	1/9	11.11	0.144985	0.517021	7.1392	13.7867	ABCB1
BH3-only Proteins Associate With and Inactivate Anti-Apoptotic BCL-2 Members	1/9	11.11	0.144985	0.517021	7.1392	13.7867	BID
CD163 Mediating an Anti-Inflammatory Response	1/9	11.11	0.144985	0.517021	7.1392	13.7867	IL6
Phase 3 - Rapid Repolarisation	1/9	11.11	0.144985	0.517021	7.1392	13.7867	KCNE4
RHO GTPases Activate Rhotekin and Rhophilins	1/9	11.11	0.144985	0.517021	7.1392	13.7867	LIN7B
Hydrolysis of LPC	1/9	11.11	0.144985	0.517021	7.1392	13.7867	PLA2G4C
MAPK1 (ERK2) Activation	1/9	11.11	0.144985	0.517021	7.1392	13.7867	IL6
Signaling by TGFB Family Members	5/161	3.11	0.146372	0.517776	1.8381	3.5322	TGFB2;BAMBI;SERPINE1;TIMP1;JUNB
Toll Like Receptor 2 (TLR2) Cascade	4/118	3.39	0.147251	0.517776	2.0107	3.8517	NFKBIA;IRAK2;NFKB2;NFKBIB
Toll Like Receptor TLR1 TLR2 Cascade	4/118	3.39	0.147251	0.517776	2.0107	3.8517	NFKBIA;IRAK2;NFKB2;NFKBIB
Regulation of Lipid Metabolism by PPARalpha	4/119	3.36	0.150447	0.526563	1.9931	3.7753	TXNRD1;ANKRD1;TRIB3;ANGPTL4
Acetylcholine Regulates Insulin Secretion	1/10	10	0.15974	0.533495	6.3456	11.6392	GNA15
Alpha-defensins	1/10	10	0.15974	0.533495	6.3456	11.6392	PRSS3
Calcitonin-like Ligand Receptors	1/10	10	0.15974	0.533495	6.3456	11.6392	ADM
HuR (ELAVL1) Binds and Stabilizes mRNA	1/10	10	0.15974	0.533495	6.3456	11.6392	ENPP2
IRAK2 Mediated Activation of TAK1 Complex	1/10	10	0.15974	0.533495	6.3456	11.6392	IRAK2
MAPK3 (ERK1) Activation	1/10	10	0.15974	0.533495	6.3456	11.6392	IL6
Maturation of Protein 3A 9683673	1/10	10	0.15974	0.533495	6.3456	11.6392	ST6GALNAC4
Maturation of Protein 3A 9694719	1/10	10	0.15974	0.533495	6.3456	11.6392	ST6GALNAC4
Uptake of Dietary Cobalamins Into Enterocytes	1/10	10	0.15974	0.533495	6.3456	11.6392	PRSS3
PKR-mediated Signaling	3/80	3.75	0.160076	0.533495	2.2303	4.0862	HERC5;TUBA4A;HSPA1B
Selenoamino Acid Metabolism	4/122	3.28	0.16019	0.533495	1.9421	3.5568	TXNRD1;CTH;GSR;SEPHS2
Aggrephagy	2/43	4.65	0.169524	0.555736	2.7894	4.9506	DYNC1I1;TUBA4A
Assembly and Cell Surface Presentation of NMDA Receptors	2/43	4.65	0.169524	0.555736	2.7894	4.9506	LIN7B;TUBA4A
OAS Antiviral Response	1/11	9.09	0.174242	0.555736	5.7108	9.9785	OASL
Pexophagy	1/11	9.09	0.174242	0.555736	5.7108	9.9785	SQSTM1
Regulation of CDH11 Function	1/11	9.09	0.174242	0.555736	5.7108	9.9785	ANGPTL4
Ribavirin ADME	1/11	9.09	0.174242	0.555736	5.7108	9.9785	SLC28A3
Free Fatty Acids Regulate Insulin Secretion	1/11	9.09	0.174242	0.555736	5.7108	9.9785	GNA15
TGFBR3 PTM Regulation	1/11	9.09	0.174242	0.555736	5.7108	9.9785	TIMP1
Interleukin-6 Signaling	1/11	9.09	0.174242	0.555736	5.7108	9.9785	IL6
Bile Acid and Bile Salt Metabolism	2/44	4.55	0.175689	0.555736	2.7229	4.7352	AKR1C1;AKR1C3
Retinoid Metabolism and Transport	2/44	4.55	0.175689	0.555736	2.7229	4.7352	AKR1C1;AKR1C3
TP53 Regulates Transcription of Cell Death Genes	2/44	4.55	0.175689	0.555736	2.7229	4.7352	CASP1;BID
Integrin Cell Surface Interactions	3/85	3.53	0.181271	0.568808	2.0938	3.5757	ICAM2;SPP1;ICAM1
G Alpha (I) Signalling Events	8/316	2.53	0.181326	0.568808	1.4912	2.5461	C3;GNA15;CXCL8;CCL20;CXCL1;CXCL3;CXCL2;CXCL5
Aspartate and Asparagine Metabolism	1/12	8.33	0.188494	0.572295	5.1913	8.6627	ASNS
O2 CO2 Exchange in Erythrocytes	1/12	8.33	0.188494	0.572295	5.1913	8.6627	CYB5R1
Presynaptic Nicotinic Acetylcholine Receptors	1/12	8.33	0.188494	0.572295	5.1913	8.6627	CHRNE
Endosomal Vacuolar Pathway	1/12	8.33	0.188494	0.572295	5.1913	8.6627	CTSS
[truncated: 511 more rows]

[truncated: 11 more sheets: WikiPathways_UP, ARCHS4_Kinases_DN, BioPlanet_DN, GO_BioProcess_DN, GO_CellComp_DN, GO_MolFunc_DN, KEA_DN, MGI_Phenotype_DN, MSigDB_Hallmark_DN, NCI_Nature_DN, Reactome_DN]
