# Supplementary material
Source: Research Square preprint supplement (doi:10.21203/rs.3.rs-9577216/v1)

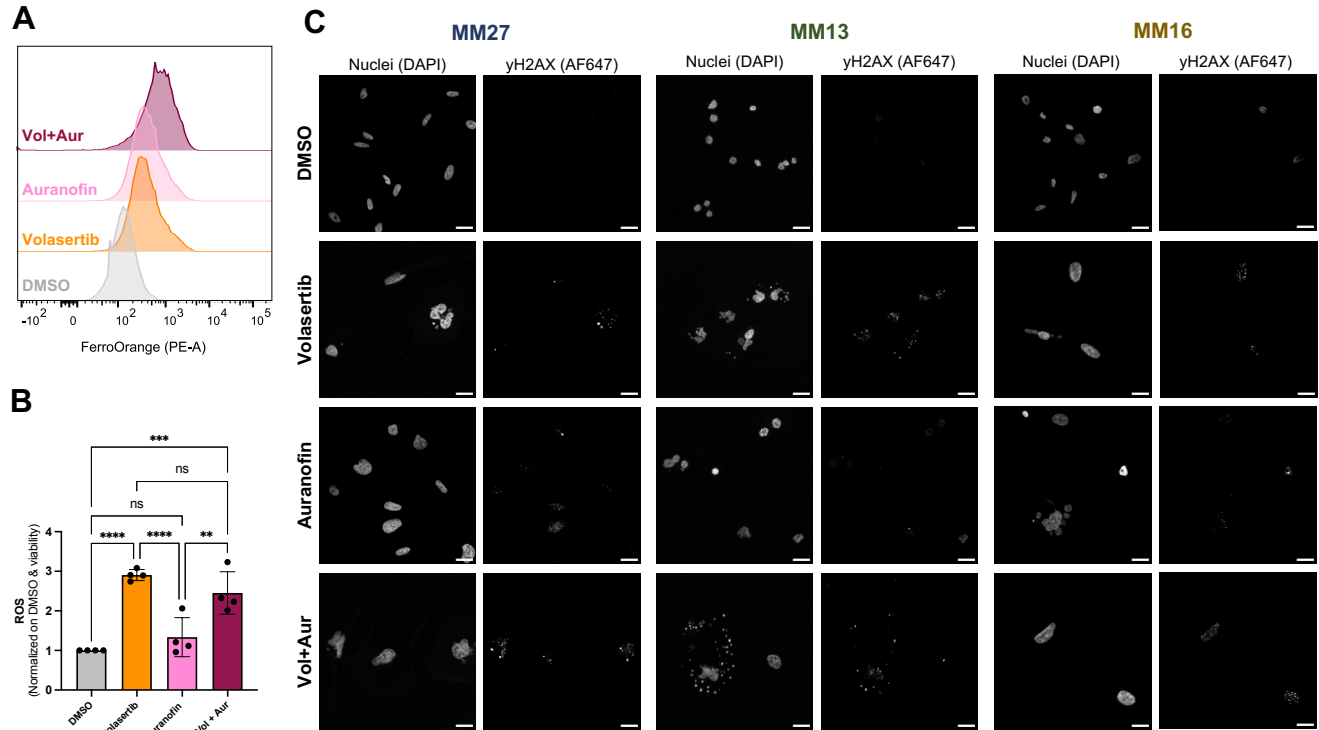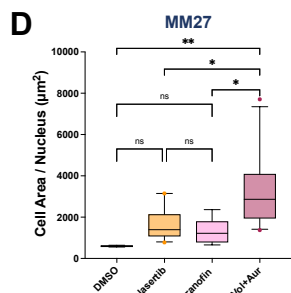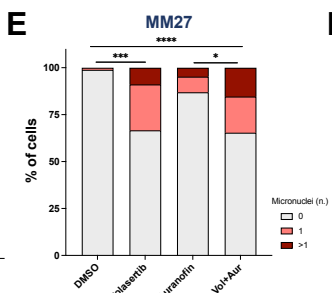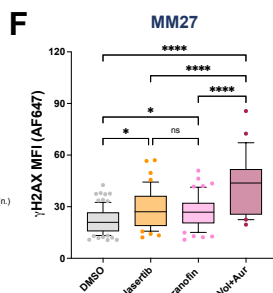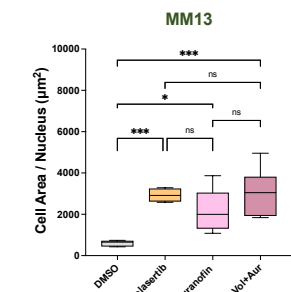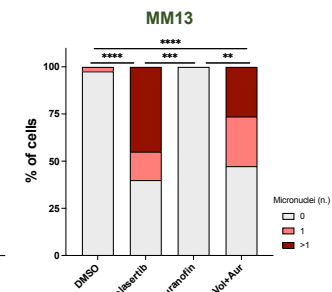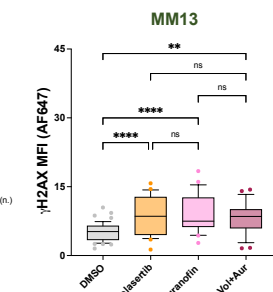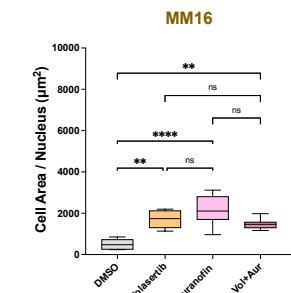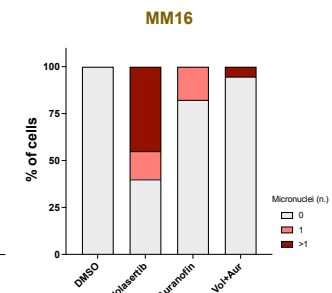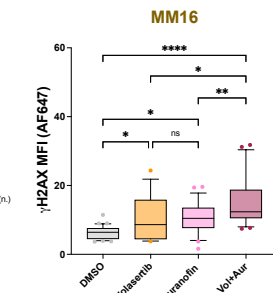

Supplement: Supplementary file 1 [file 1259c05cc109f81b8b55c53c.pdf]

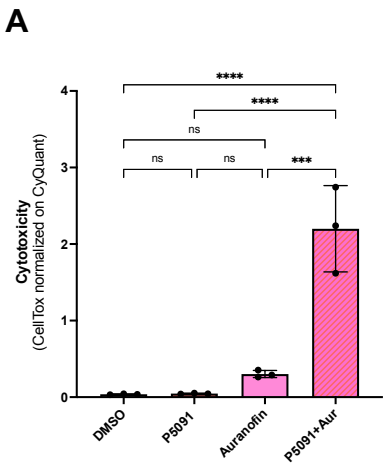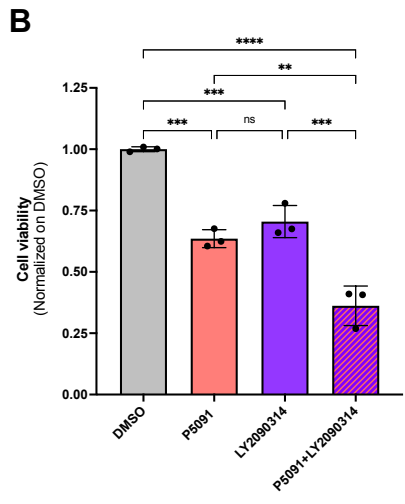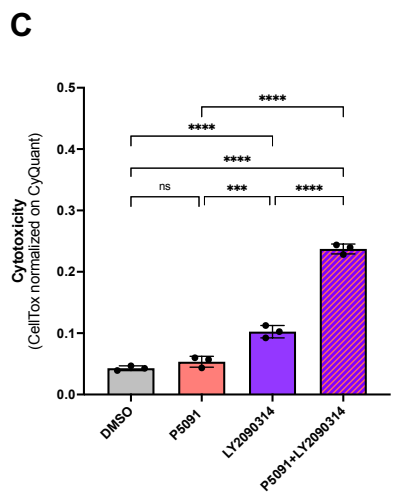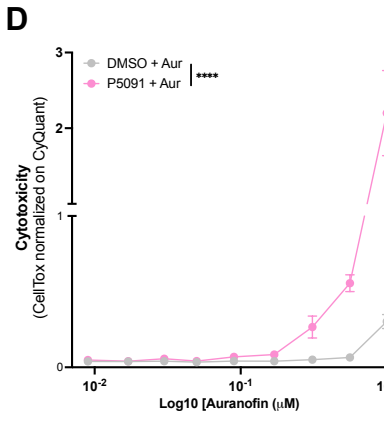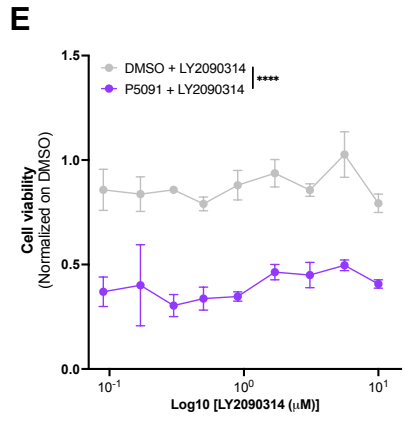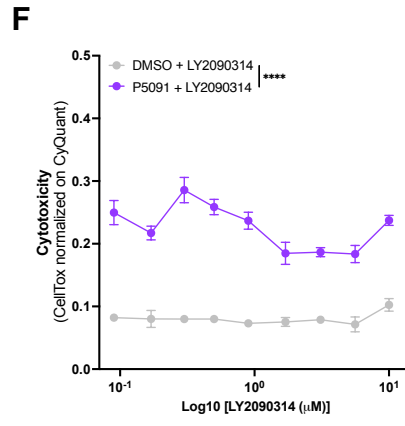

Supplement: Supplementary file 2 [file 6dbb1b6f426024ed999d1e2e.pdf]

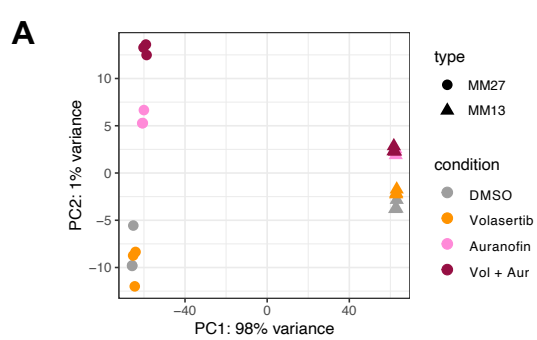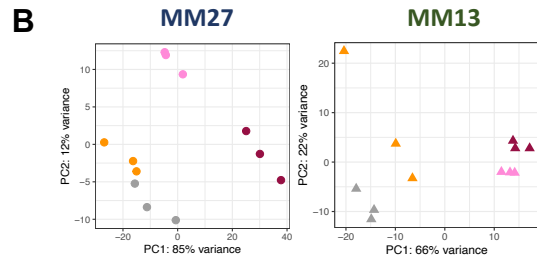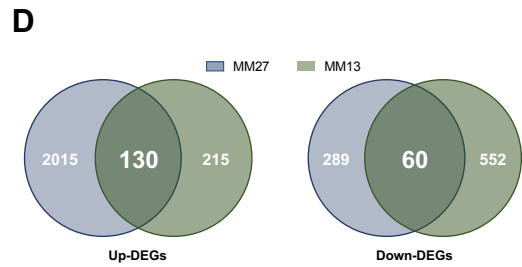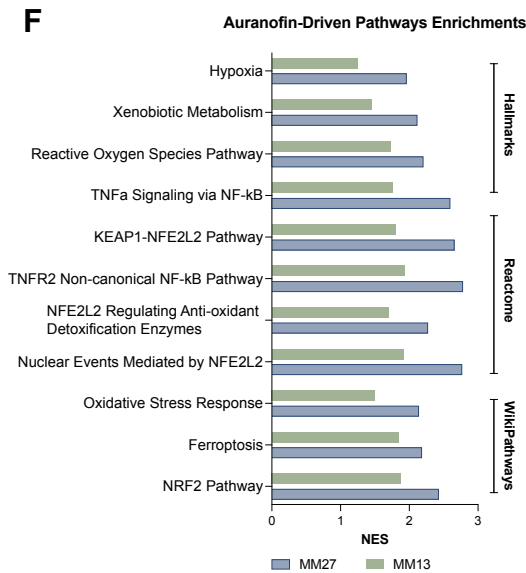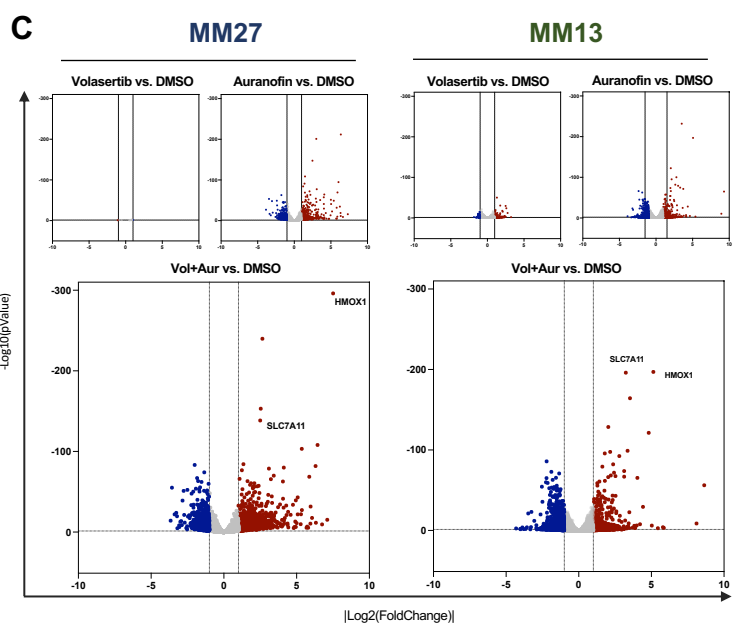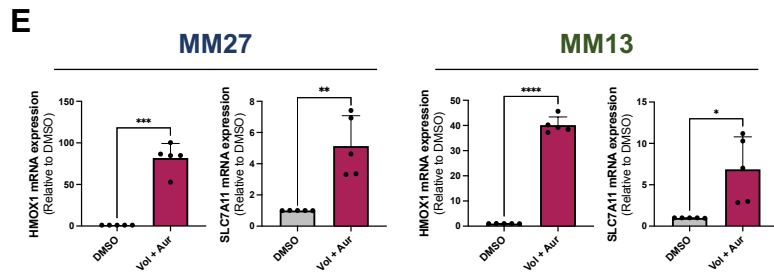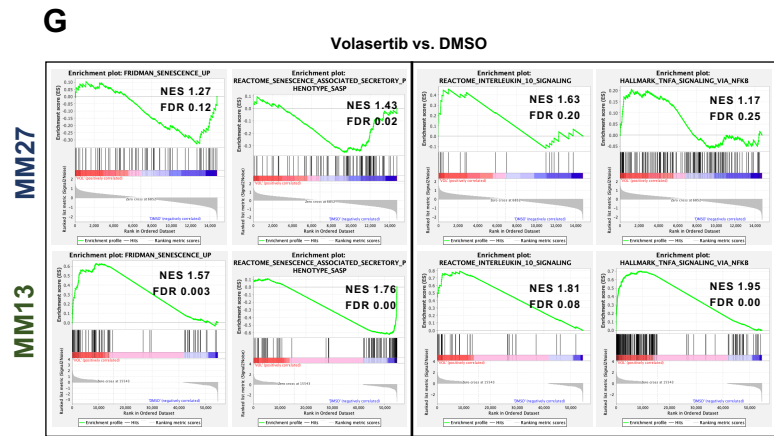

Supplement: Supplementary file 4 [file 7685db241770360b8d6cad14.pdf]

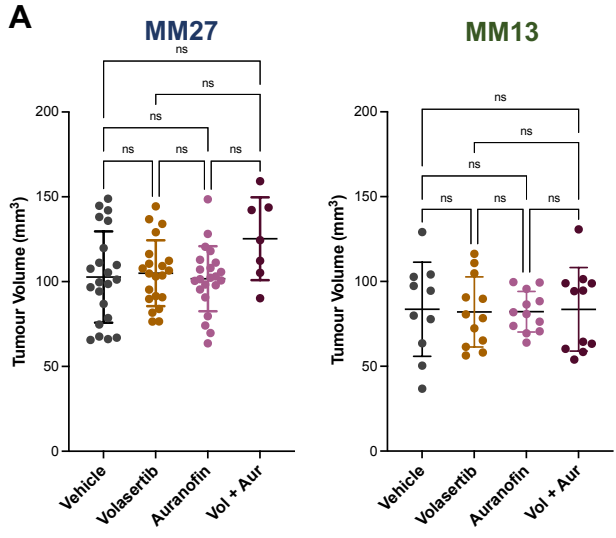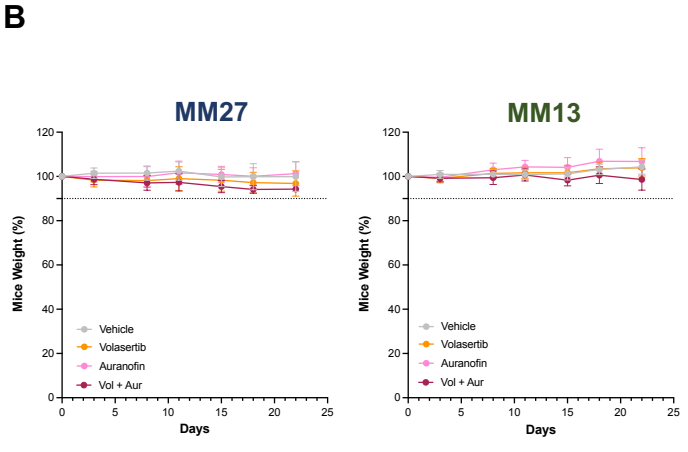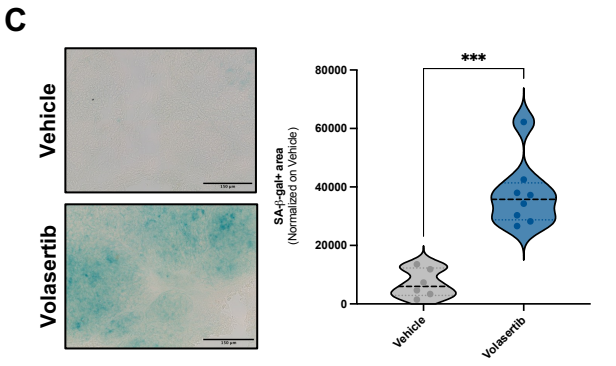

Supplement: Supplementary file 5 [file 7d0c1052735fc621694696cd.pdf]

**A**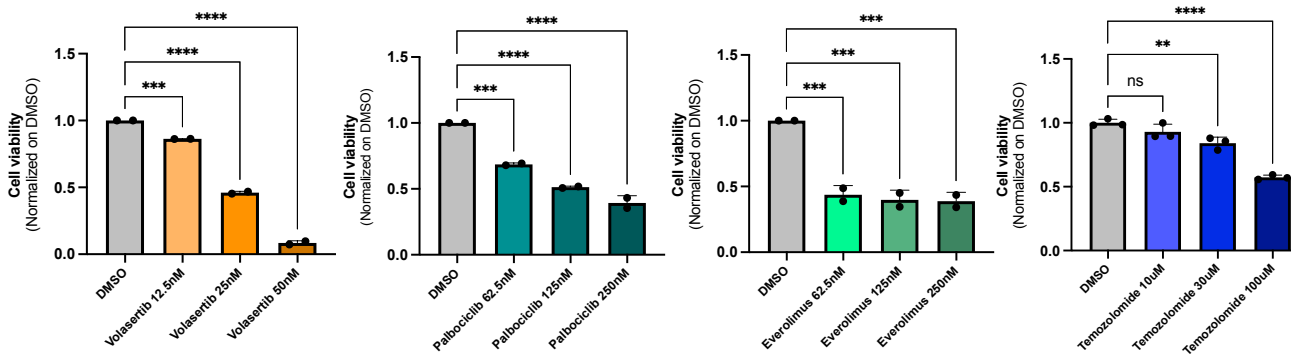**B**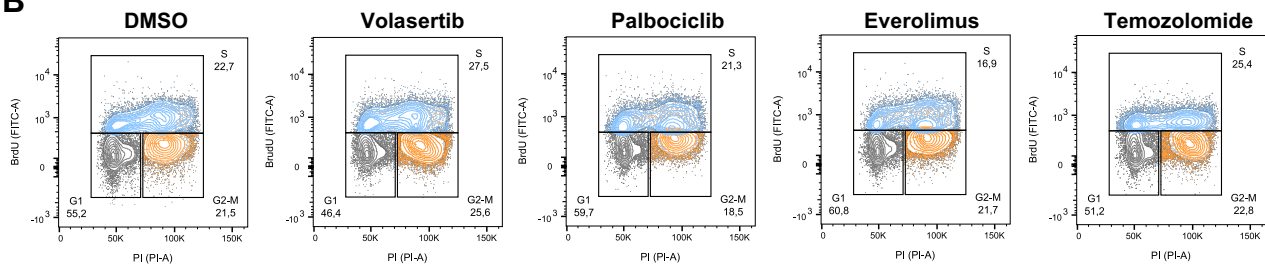

Supplement: Supplementary file 7 [file d41c34416b216f24f372ee88.pdf]

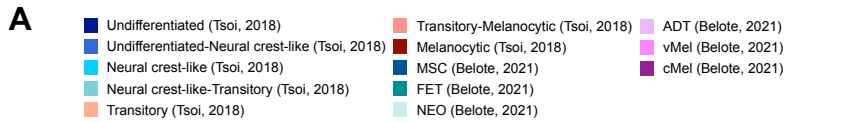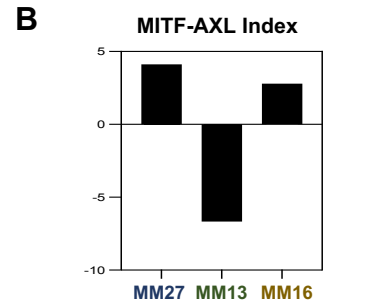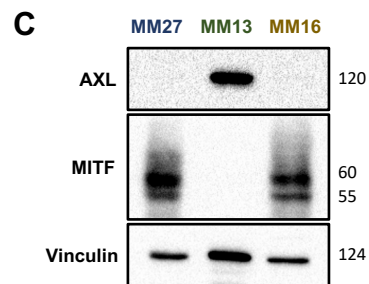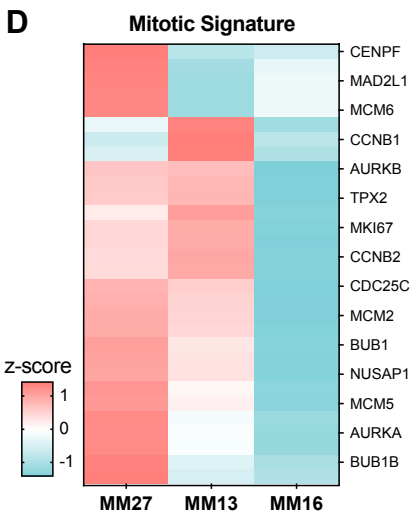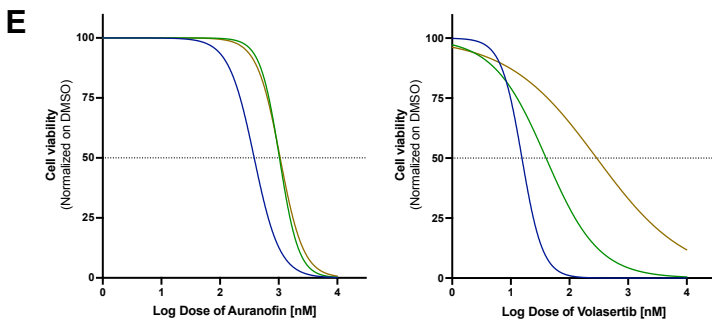

| PDX  | Mutation | IC50 Range Aur (nM) | IC50 Range Vol (nM) |
|------|----------|---------------------|---------------------|
| MM27 | BRAF     | 351.7 - 414.4       | 14.62-16.39         |
| MM13 | NRAS     | 969.5 - 1090        | 33.1-48.28          |
| MM16 | NRAS     | 892.2 - 1248        | 206.2-412.4         |

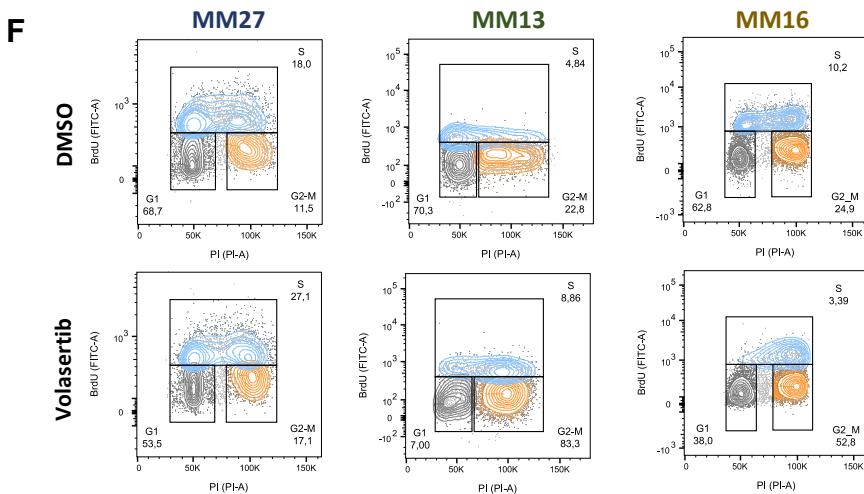

Supplement: Supplementary file 8 [file d752712761745449734356d7.pdf]
